# Supplementary material for: Large-scale hypomethylated blocks associated with Epstein-Barr virus–induced B-cell immortalization
Source: HighWire-hosted journal article supplement (doi:10.1101/gr.157743.113), 2013-09-25
Supplement: Supplemental_Data1_blocks_.xlsx [file Supplemental_Data1_blocks_.xlsx]

## Sheet: Transformation
chr	start	end	n	meanDiff	group1.mean	group2.mean	tstat.sd	direction	fwer
chr5	21975708	30486800	41473	-0.287536	0.53863	0.826166	0.0316431	hypo	0
chr16	58771669	65154361	34184	-0.285851	0.525149	0.811	0.0319377	hypo	0
chr7	79769950	86776753	33729	-0.279287	0.550924	0.830211	0.0313059	hypo	0
chr11	36534470	43328065	32370	-0.290067	0.518661	0.808729	0.0317164	hypo	0
chr9	7803478	14311857	33482	-0.276551	0.539071	0.815622	0.0320375	hypo	0
chr4	178371382	183367687	32489	-0.260024	0.561311	0.821335	0.0305553	hypo	0
chr3	75907464	81545671	30644	-0.273747	0.546783	0.820531	0.0323632	hypo	0
chr5	162952552	167716688	30499	-0.272128	0.55136	0.823488	0.0323028	hypo	0
chr4	62074650	68300447	27177	-0.281179	0.526277	0.807456	0.0297473	hypo	0
chr1	237208732	241653592	31615	-0.26169	0.560775	0.822466	0.0326804	hypo	0
chr1	186429580	192954582	29851	-0.269121	0.553193	0.822314	0.0320516	hypo	0
chr2	122530032	127416684	26948	-0.276123	0.542282	0.818405	0.0303787	hypo	0
chr10	106405463	111617846	27224	-0.262816	0.537374	0.80019	0.0293663	hypo	0
chr8	12623461	17028548	29171	-0.259974	0.553541	0.813516	0.032694	hypo	0
chr16	5319040	8636894	29735	-0.253997	0.535254	0.789251	0.0324343	hypo	0
chr8	136472275	140714133	27703	-0.266022	0.534297	0.800318	0.0324744	hypo	0
chr18	61648370	66346362	25490	-0.269967	0.550992	0.820959	0.0309207	hypo	0
chr3	81832887	87285562	26155	-0.269635	0.548887	0.818521	0.0319538	hypo	0
chr2	75941892	80527128	22570	-0.275835	0.530983	0.806817	0.0299377	hypo	0
chr7	144511674	148391262	24443	-0.26168	0.569291	0.830971	0.0309184	hypo	0
chr2	49472260	53891840	21927	-0.285834	0.536618	0.822453	0.0308327	hypo	0
chr4	134076411	139095133	22154	-0.278989	0.539258	0.818247	0.0310227	hypo	0
chr12	125678073	128750714	24279	-0.252891	0.543251	0.796142	0.031	hypo	0
chr18	35070120	39530063	22428	-0.278978	0.538064	0.817042	0.0316419	hypo	0
chr21	22371380	26593931	23338	-0.256383	0.581105	0.837488	0.0300395	hypo	0
chr14	82016529	85992756	20364	-0.292881	0.524806	0.817687	0.03086	hypo	0
chr9	27582867	32413219	22168	-0.26951	0.535027	0.804537	0.0309145	hypo	0
chr13	103680988	107144140	22323	-0.262539	0.570249	0.832788	0.0306964	hypo	0
chr2	80534743	84653209	19561	-0.292915	0.530079	0.822994	0.0301333	hypo	0
chr2	139358281	143620111	20955	-0.274632	0.548588	0.823221	0.0303109	hypo	0
chr8	33456603	37428685	22253	-0.267323	0.537214	0.804537	0.0322043	hypo	0
chr11	96438151	100551572	20154	-0.286888	0.532704	0.819591	0.0312852	hypo	0
chr4	31837662	36055419	19277	-0.287109	0.539799	0.826908	0.0303204	hypo	0
chr2	114740841	118571009	20301	-0.271483	0.532673	0.804156	0.0301365	hypo	0
chr10	8107417	11052796	20078	-0.263915	0.572167	0.836082	0.0288872	hypo	0
chr10	65396696	69524182	19500	-0.278308	0.538526	0.816833	0.0298408	hypo	0
chr13	88331621	91993937	18052	-0.296766	0.537797	0.834563	0.0295638	hypo	0
chr9	15560765	19045881	22095	-0.256925	0.571086	0.828011	0.031902	hypo	0
chr13	53428820	57714816	19510	-0.282786	0.521681	0.804467	0.0310257	hypo	0
chr3	5268789	8722686	19915	-0.280438	0.546055	0.826493	0.0315918	hypo	0
chr4	27015780	30716726	18760	-0.281904	0.525519	0.807423	0.0301175	hypo	0
chr11	22856470	27353754	20353	-0.275173	0.52675	0.801923	0.0320101	hypo	0
chr9	119467210	123145673	20709	-0.266	0.521862	0.787862	0.0314958	hypo	0
chr13	64415558	68476201	18856	-0.281164	0.558403	0.839567	0.0302712	hypo	0
chr1	79125497	83598063	22007	-0.262792	0.564757	0.827549	0.0332617	hypo	0
chr5	10765741	14104718	20314	-0.272516	0.544493	0.817008	0.0319908	hypo	0
chr10	82307959	85901671	18605	-0.273685	0.534412	0.808097	0.029394	hypo	0
chr13	68490395	72434347	18667	-0.286428	0.545921	0.832348	0.031423	hypo	0
chr20	58635946	60545649	21957	-0.224439	0.593627	0.818066	0.0290805	hypo	0
chr8	2339720	4846464	23207	-0.239742	0.57577	0.815512	0.0337474	hypo	0
chr6	66029309	70380358	18830	-0.280023	0.524661	0.804684	0.0319647	hypo	0
chr5	102626087	106711511	18473	-0.280657	0.547379	0.828036	0.0312507	hypo	0
chr8	48983649	52734398	21961	-0.24775	0.563693	0.811443	0.0333899	hypo	0
chr4	160287189	164028655	18170	-0.266199	0.548983	0.815183	0.0298832	hypo	0
chr4	187894699	190490314	20633	-0.242491	0.578987	0.821478	0.0315116	hypo	0
chr17	49379278	53033574	18307	-0.282985	0.516796	0.799781	0.0323566	hypo	0
chr12	16194639	19587865	17885	-0.266917	0.55566	0.822578	0.0303907	hypo	0
chr18	25761709	29206013	17532	-0.274168	0.540452	0.814619	0.0305144	hypo	0
chr11	131563109	133936574	20644	-0.242524	0.544232	0.786757	0.0322365	hypo	0
chr13	92021697	95199054	16824	-0.281692	0.54692	0.828612	0.0303855	hypo	0
chr13	80921519	84449607	15800	-0.290492	0.542775	0.833267	0.0299414	hypo	0
chr14	97413380	99707216	18874	-0.253318	0.549135	0.802453	0.0314535	hypo	0
chr21	19221651	22370778	16715	-0.282931	0.545899	0.82883	0.0314369	hypo	0
chr8	110626129	114440939	16961	-0.290945	0.522918	0.813863	0.0328553	hypo	0
chrX	31286853	37048954	28950	-0.237149	0.53013	0.767279	0.0460404	hypo	0
chr4	95584784	99173052	16430	-0.276802	0.551912	0.828714	0.0311006	hypo	0
chr6	161653497	163821759	19385	-0.240974	0.615201	0.856175	0.0317252	hypo	0
chr15	86342957	89002267	16748	-0.263802	0.527673	0.791475	0.0304562	hypo	0
chr7	66815718	69058543	19293	-0.234784	0.595601	0.830384	0.0312859	hypo	0
chr1	193251723	197048247	17452	-0.262961	0.574445	0.837407	0.0317301	hypo	0
chr4	115520086	119193304	15785	-0.274929	0.549269	0.824198	0.0307524	hypo	0
chr7	51469813	54285999	15470	-0.284222	0.518521	0.802744	0.0312943	hypo	0
chr14	24908117	28220301	15763	-0.274189	0.511656	0.785845	0.0308718	hypo	0
chr10	77169176	79395247	14765	-0.282997	0.549925	0.832922	0.0301453	hypo	0
chr2	145283123	148594783	15582	-0.276873	0.589345	0.866219	0.0307899	hypo	0
chr3	115380439	118928627	17435	-0.260749	0.541727	0.802476	0.032716	hypo	0
chr3	93850165	97484044	15855	-0.279655	0.541082	0.820737	0.032496	hypo	0
chr7	12735409	15723239	16087	-0.279842	0.543194	0.823036	0.0334869	hypo	0
chr14	78354087	80973061	15401	-0.265499	0.536305	0.801805	0.0301112	hypo	0
chr4	166260978	169159155	14579	-0.276641	0.548063	0.824704	0.0297701	hypo	0
chr1	47918060	50878482	16370	-0.261657	0.532793	0.79445	0.0319966	hypo	0
chr2	21178237	23603267	14187	-0.281723	0.526372	0.808095	0.0296849	hypo	0
chr6	21670252	24356007	16440	-0.258951	0.581628	0.840579	0.0318675	hypo	0
chr11	79159315	82544461	16369	-0.2667	0.535395	0.802096	0.0331098	hypo	0
chr8	104517640	107662538	16080	-0.265968	0.558348	0.824316	0.0321776	hypo	0
chr13	61151595	64290620	14353	-0.265299	0.541817	0.807116	0.0299389	hypo	0
chr21	30857589	33025926	16135	-0.2331	0.604224	0.837325	0.0297614	hypo	0
chr18	48729425	51654556	15334	-0.25873	0.537313	0.796043	0.0320168	hypo	0
chr14	42086150	45357947	13853	-0.276444	0.559997	0.836441	0.0308417	hypo	0
chr20	52830853	54938914	13525	-0.26649	0.525191	0.791682	0.029339	hypo	0
chr2	33832460	36581458	14075	-0.264029	0.557142	0.821172	0.0302762	hypo	0
chr6	101853874	105174018	14321	-0.276177	0.527111	0.803288	0.0321767	hypo	0
chr4	91051022	94746891	15784	-0.249907	0.593106	0.843014	0.0337137	hypo	0
chr10	131997036	133381232	16060	-0.229799	0.580713	0.810511	0.030584	hypo	0
chr21	40824457	42535252	14048	-0.26638	0.539907	0.806287	0.0311685	hypo	0
chr11	89952963	92883841	13582	-0.283214	0.521064	0.804279	0.0318158	hypo	0
chr3	20241543	23241768	14193	-0.271938	0.548953	0.820892	0.0319428	hypo	0
chr5	3606087	5418265	14931	-0.257848	0.548619	0.806466	0.0320839	hypo	0
chr12	72667071	75768307	12876	-0.280021	0.527541	0.807562	0.0304293	hypo	0
chr8	82760134	86011476	14103	-0.274989	0.535942	0.810931	0.0327778	hypo	0
chr2	103350518	105460768	13186	-0.26711	0.566224	0.833334	0.0299572	hypo	0
chr15	96963350	98963890	14133	-0.26475	0.524008	0.788759	0.0322502	hypo	0
chr6	122800835	125584929	13928	-0.280598	0.527122	0.80772	0.034111	hypo	0
chr6	53668031	56707758	14745	-0.254294	0.564467	0.818761	0.0321406	hypo	0
chr2	40014537	42322834	12864	-0.275732	0.55517	0.830901	0.0304523	hypo	0
chr14	86003570	88430408	12766	-0.282032	0.541655	0.823687	0.0308274	hypo	0
chr6	38682907	41015202	16479	-0.226108	0.571961	0.798068	0.0321104	hypo	0
chr3	33911971	36923391	13482	-0.276474	0.548685	0.825159	0.032182	hypo	0
chr2	228431401	230618165	14400	-0.250072	0.557788	0.80786	0.0311042	hypo	0
chr15	53100895	55476050	12227	-0.28709	0.528074	0.815164	0.0303189	hypo	0
chr10	33628102	35283854	13481	-0.249068	0.589535	0.838603	0.0294042	hypo	0
chr7	8484710	10976436	11513	-0.305305	0.51563	0.820936	0.0308356	hypo	0
chr2	166818380	169312544	12996	-0.271189	0.569935	0.841124	0.0312021	hypo	0
chr11	126270769	128308607	15007	-0.236197	0.567209	0.803406	0.0309979	hypo	0
chr7	70162278	71796958	15072	-0.240452	0.591857	0.832309	0.0320892	hypo	0
chr1	104303555	107591995	14348	-0.262131	0.549457	0.811587	0.0334703	hypo	0
chr20	40327940	42076822	12375	-0.268449	0.523334	0.791783	0.029339	hypo	0
chr2	187544524	190295300	12537	-0.276753	0.54505	0.821802	0.0309606	hypo	0
chr2	204403662	206545776	13749	-0.247488	0.592216	0.839704	0.0300117	hypo	0
chr6	91300886	94129281	13095	-0.279236	0.525148	0.804384	0.0325124	hypo	0
chr4	44730851	47455435	12065	-0.273949	0.532123	0.806072	0.0295323	hypo	0
chr2	1752134	3151325	15070	-0.222384	0.610251	0.832635	0.0301014	hypo	0
chr13	84455475	86760091	11425	-0.297969	0.538015	0.835984	0.0307931	hypo	0
chr5	82776145	85580153	12889	-0.274704	0.539141	0.813845	0.0321408	hypo	0
chr5	159937617	162858716	14133	-0.257792	0.540415	0.798207	0.0339378	hypo	0
chr17	68169851	70108795	12255	-0.285321	0.541228	0.826549	0.0319468	hypo	0
chr3	108394902	111253401	13984	-0.250185	0.56952	0.819705	0.031922	hypo	0
chr16	25285145	27205996	14291	-0.245419	0.545798	0.791217	0.0323189	hypo	0
chr2	220474296	222432111	12639	-0.26092	0.570476	0.831396	0.0303726	hypo	0
chr4	22520252	24470142	11761	-0.274542	0.546128	0.82067	0.0297171	hypo	0
chr6	76467183	79576588	12849	-0.274228	0.522015	0.796243	0.0329303	hypo	0
chr18	67964378	70208357	13213	-0.259365	0.550451	0.809815	0.0317394	hypo	0
chr16	82207214	83837890	13625	-0.250411	0.552532	0.802943	0.0316706	hypo	0
chr10	35934002	38107457	12961	-0.246054	0.57124	0.817294	0.0298419	hypo	0
chr4	126241871	128694731	11322	-0.283974	0.532222	0.816196	0.0300163	hypo	0
chr18	39664654	42253947	11529	-0.285176	0.535831	0.821006	0.0309322	hypo	0
chr3	58492294	61172723	16222	-0.20868	0.650905	0.859585	0.0317357	hypo	0
chr12	85674225	88432108	11849	-0.27548	0.537529	0.813009	0.0310593	hypo	0
chr1	55689815	57885630	12844	-0.263644	0.557841	0.821484	0.0322722	hypo	0
chr6	164182855	166072878	13418	-0.254668	0.564638	0.819306	0.0324546	hypo	0
chr1	163316276	165564456	13134	-0.255863	0.531944	0.787806	0.0321012	hypo	0
chrX	25042394	29464238	20632	-0.234621	0.521827	0.756448	0.0461945	hypo	0
chr8	68262037	70585460	13268	-0.254027	0.562752	0.816779	0.0328946	hypo	0
chr12	77463484	79941817	11953	-0.263894	0.559062	0.822956	0.0307052	hypo	0
chr4	130021991	132577735	11372	-0.272711	0.547347	0.820058	0.0304053	hypo	0
chr6	8439486	10379814	12281	-0.268244	0.551838	0.820082	0.0323589	hypo	0
chr12	60184756	62640062	10229	-0.302896	0.513121	0.816018	0.0302923	hypo	0
chr5	115915414	118316184	12311	-0.260638	0.578335	0.838973	0.0314405	hypo	0
chr2	211337738	213731470	11758	-0.261785	0.54439	0.806175	0.0303893	hypo	0
chr3	164915073	167388397	10739	-0.298506	0.534427	0.832933	0.0316516	hypo	0
chr10	86257959	88124205	10890	-0.271417	0.526403	0.79782	0.0293469	hypo	0
chr2	163215837	165477388	11082	-0.277869	0.540008	0.817877	0.0308819	hypo	0
chr20	6024469	7963527	10933	-0.273328	0.519472	0.7928	0.0298149	hypo	0
chr7	77652637	79758009	10999	-0.279287	0.54528	0.824567	0.0305459	hypo	0
chr2	129078971	130722437	12840	-0.236065	0.588246	0.824311	0.0303514	hypo	0
chr18	7123081	8605661	11996	-0.259588	0.579812	0.8394	0.0312965	hypo	0
chr6	139701089	142467428	13637	-0.237437	0.615744	0.853182	0.0326609	hypo	0
chr15	25689475	27211186	13316	-0.239319	0.556942	0.796261	0.0322464	hypo	0
chr14	45724030	48139463	10536	-0.287009	0.5372	0.824208	0.0305337	hypo	0
chr12	22841443	25048722	12854	-0.246965	0.614511	0.861476	0.0332091	hypo	0
chr9	104332950	106855012	11300	-0.272899	0.518728	0.791627	0.0319274	hypo	0
chr7	3345473	4622202	13859	-0.213768	0.643958	0.857727	0.0305362	hypo	0
chr13	107227064	108864250	11463	-0.258037	0.549856	0.807893	0.03056	hypo	0
chr3	188160427	190227812	13264	-0.232195	0.617499	0.849693	0.0321795	hypo	0
chr1	208137540	209926854	12143	-0.252864	0.560719	0.813583	0.0322751	hypo	0
chr8	20165447	21624068	11290	-0.266937	0.554676	0.821613	0.0318836	hypo	0
chr2	58476162	60561140	11529	-0.248196	0.615459	0.863655	0.0303399	hypo	0
chr4	18032276	20249878	10527	-0.272007	0.533647	0.805655	0.0306774	hypo	0
chr10	55264026	57388631	9931	-0.280565	0.530032	0.810597	0.0299791	hypo	0
chr7	108222639	110699342	10766	-0.266	0.555803	0.821803	0.030542	hypo	0
chr9	74982182	77111667	11024	-0.261049	0.570497	0.831545	0.0309975	hypo	0
chr9	117410267	119439280	11197	-0.252395	0.562298	0.814693	0.0304334	hypo	0
chr20	50819234	52172854	10893	-0.24565	0.574434	0.820084	0.0289899	hypo	0
chr10	128766390	129846928	11051	-0.245852	0.577224	0.823075	0.029552	hypo	0
chr3	143731793	146245198	11008	-0.26966	0.554963	0.824623	0.0323141	hypo	0
chr4	59789825	62061317	9745	-0.286592	0.530007	0.816599	0.0304171	hypo	0
chr17	31261069	32904845	11531	-0.256728	0.517981	0.774709	0.0324183	hypo	0
chr16	78162228	79629353	15182	-0.188572	0.683203	0.871775	0.0311043	hypo	0
chr5	143194524	145478224	11011	-0.264639	0.563699	0.828338	0.0318674	hypo	0
chr18	30351010	32555060	10790	-0.26405	0.531185	0.795235	0.0313021	hypo	0
chr4	20746227	22514608	9723	-0.274642	0.529269	0.803911	0.0294607	hypo	0
chr13	58213946	60237179	9987	-0.276844	0.551101	0.827945	0.0306229	hypo	0
chr3	69160364	71112657	12435	-0.233333	0.60084	0.834173	0.0324139	hypo	0
chr3	88222796	90504813	10448	-0.276237	0.551411	0.827648	0.0320668	hypo	0
chr8	4854787	6257405	11456	-0.25415	0.562722	0.816872	0.0324248	hypo	0
chr8	39368347	41163156	12046	-0.238437	0.571767	0.810204	0.0323083	hypo	0
chr1	17770508	18955543	12591	-0.219995	0.537481	0.757476	0.0312707	hypo	0
chr5	151210673	153373097	10213	-0.273199	0.515271	0.78847	0.031607	hypo	0
chr11	83002200	85336240	10832	-0.259128	0.573293	0.832421	0.0318587	hypo	0
chr3	28390795	30642073	11134	-0.25598	0.583006	0.838986	0.0325944	hypo	0
chr12	115178205	116705125	11938	-0.221497	0.590917	0.812414	0.0302805	hypo	0
chr15	95021108	96593052	10780	-0.244642	0.559595	0.804237	0.0301932	hypo	0
chr18	57650488	59558647	10774	-0.255152	0.569895	0.825047	0.03172	hypo	0
chr2	3640011	5018638	10796	-0.248301	0.561734	0.810034	0.0308288	hypo	0
chr5	18749838	20694413	9681	-0.282971	0.546914	0.829885	0.0315005	hypo	0
chr15	23680691	25567801	12767	-0.216772	0.558281	0.775053	0.0320785	hypo	0
chr5	7909855	9543644	9996	-0.267517	0.53635	0.803867	0.030942	hypo	0
chr11	28360019	30605361	10168	-0.270621	0.52467	0.795291	0.0318664	hypo	0
chr5	145892030	147763558	10377	-0.269286	0.543578	0.812864	0.0325236	hypo	0
chr1	4717300	5926752	12135	-0.228011	0.55995	0.787961	0.0321123	hypo	0
chr7	30828783	32526764	11111	-0.240731	0.553876	0.794606	0.0312418	hypo	0
chr9	137338460	138365215	14347	-0.186243	0.615084	0.801327	0.0312611	hypo	0
chr7	45967465	47609949	11597	-0.227045	0.603986	0.831031	0.0312943	hypo	0
chr7	33178804	34961128	10133	-0.260786	0.571171	0.831957	0.0313966	hypo	0
chr10	43954199	45435744	10741	-0.233065	0.561983	0.795048	0.030012	hypo	0
chr3	73524994	75429829	9945	-0.272564	0.523426	0.79599	0.0324873	hypo	0
chr2	133108945	134873256	10929	-0.243544	0.561272	0.804816	0.0320171	hypo	0
chr3	64672851	66170242	10340	-0.263451	0.552452	0.815903	0.0325521	hypo	0
chr3	162545420	164908131	9575	-0.284828	0.522512	0.807339	0.0326196	hypo	0
chr2	192572176	194689205	9779	-0.268325	0.564153	0.832477	0.0316318	hypo	0
chr2	55926078	58099381	9826	-0.262079	0.554974	0.817052	0.0309568	hypo	0
chr8	92811562	94707472	10164	-0.265148	0.552639	0.817787	0.0326203	hypo	0
chr1	176181396	178059929	10053	-0.258821	0.531773	0.790594	0.0311948	hypo	0
chr2	12866170	14772268	9863	-0.261236	0.544409	0.805644	0.0312012	hypo	0
chr10	1977910	3104880	10877	-0.223896	0.59503	0.818925	0.0295676	hypo	0
chr2	137141738	139225135	10107	-0.248647	0.556107	0.804754	0.0309865	hypo	0
chr4	170688829	172542240	9566	-0.259199	0.569159	0.828358	0.0302438	hypo	0
chr3	24036152	25638098	9721	-0.267355	0.550751	0.818107	0.0315991	hypo	0
chr13	108944818	110433991	11186	-0.222785	0.599101	0.821886	0.0305267	hypo	0
chr2	153618806	155552590	8918	-0.279672	0.522689	0.802361	0.0305332	hypo	0
chr20	37681944	39311450	9305	-0.266439	0.542793	0.809232	0.0308264	hypo	0
chr2	217561701	219078115	10605	-0.228973	0.588079	0.817052	0.0300901	hypo	0
chr17	10637652	11874905	10380	-0.248348	0.559098	0.807446	0.031681	hypo	0
chrX	3855730	6142234	13397	-0.276337	0.546755	0.823092	0.0454707	hypo	0
chr20	13797787	16006776	13002	-0.20205	0.640939	0.842989	0.0336361	hypo	0
chr16	73103677	74322939	11069	-0.22704	0.601126	0.828165	0.0312243	hypo	0
chr14	48148429	50031558	8784	-0.27822	0.535624	0.813844	0.0304816	hypo	0
chr7	117854191	119912912	8647	-0.286907	0.513772	0.800679	0.0311033	hypo	0
chr10	20110259	21461111	8586	-0.272732	0.563026	0.835758	0.0294231	hypo	0
chr18	913003	2539090	8777	-0.275864	0.53122	0.807085	0.0302386	hypo	0
chr16	65159414	66458043	9192	-0.274478	0.518835	0.793314	0.0317055	hypo	0
chr22	48973799	49869669	12847	-0.197111	0.624115	0.821226	0.0323292	hypo	0
chr18	75772068	76729287	12263	-0.200665	0.634878	0.835543	0.0311527	hypo	0
chr7	40176368	41736255	9741	-0.26249	0.598266	0.860756	0.0326024	hypo	0
chr4	7077860	7962605	12166	-0.191668	0.583006	0.774673	0.0293688	hypo	0
chr3	101914459	104128717	9956	-0.258363	0.563351	0.821714	0.0326414	hypo	0
chr16	79636265	80997544	10669	-0.236216	0.600345	0.836561	0.0319174	hypo	0
chr9	22010690	23821313	9092	-0.268801	0.532201	0.801002	0.0308612	hypo	0
chr15	93575928	94761115	10085	-0.233521	0.575274	0.808795	0.0299222	hypo	0
chr2	225915431	227654602	9127	-0.261919	0.557215	0.819134	0.0304855	hypo	0
chr10	79798230	80825352	8575	-0.26195	0.558485	0.820436	0.0285558	hypo	0
chr5	14876157	16446505	9612	-0.26159	0.540026	0.801616	0.0322575	hypo	0
chr3	54160638	55510396	9601	-0.261181	0.539869	0.801049	0.0321655	hypo	0
chr4	175246429	177236968	11055	-0.235406	0.600403	0.835809	0.034035	hypo	0
chr2	121200646	122039529	10176	-0.228553	0.581093	0.809645	0.0301405	hypo	0
chr7	124581494	126518214	8687	-0.271956	0.542531	0.814488	0.0304646	hypo	0
chr9	23830755	25668977	8379	-0.28732	0.518409	0.805729	0.0312787	hypo	0
chr3	172546930	174156886	8255	-0.294892	0.52702	0.821912	0.0318062	hypo	0
chr9	84564014	86231954	8967	-0.270951	0.568547	0.839498	0.0320587	hypo	0
chr15	27220051	28337570	9359	-0.252982	0.564855	0.817837	0.0312434	hypo	0
chr18	24241846	25753672	8560	-0.274655	0.545867	0.820522	0.0307913	hypo	0
chr7	87856717	89749214	8007	-0.289494	0.523352	0.812846	0.0305903	hypo	0
chr16	75706045	77220706	9356	-0.260262	0.549404	0.809666	0.0320869	hypo	0
chr12	97351804	98891522	8831	-0.251912	0.548413	0.800325	0.029388	hypo	0
chr1	30028252	31196669	9429	-0.251075	0.512993	0.764068	0.0314584	hypo	0
chr5	61943933	64016495	9034	-0.265419	0.519445	0.784863	0.0326779	hypo	0
chr15	60890502	62143482	9818	-0.230577	0.612322	0.842899	0.0304295	hypo	0
chr2	16330080	17832107	9054	-0.260078	0.553561	0.813639	0.032265	hypo	0
chr6	18257508	19835873	9031	-0.261728	0.539597	0.801325	0.0319916	hypo	0
chr12	40607460	42471378	9126	-0.245351	0.571037	0.816388	0.0308938	hypo	0
chr18	72999575	74061128	9750	-0.230757	0.591176	0.821933	0.0306366	hypo	0
chr20	18741820	19993383	9491	-0.232308	0.591245	0.823552	0.0304068	hypo	0
chr8	87572999	89338316	8094	-0.295952	0.532522	0.828474	0.0327555	hypo	0
chr6	47600036	49408516	8094	-0.286882	0.525811	0.812694	0.0315708	hypo	0
chr4	42665375	44450234	7765	-0.275913	0.53086	0.806773	0.0292692	hypo	0
chr11	20630635	22357287	8294	-0.27907	0.502928	0.781998	0.0316209	hypo	0
chr4	16239724	17479634	8058	-0.269621	0.564908	0.834529	0.0296411	hypo	0
chr2	198657943	200319670	8071	-0.273257	0.531615	0.804872	0.0304237	hypo	0
chrX	92085712	95309674	11619	-0.285704	0.511548	0.797252	0.0454775	hypo	0
chr11	15019621	16624541	8269	-0.277134	0.525461	0.802595	0.0318785	hypo	0
chr4	72057616	73912092	8142	-0.263048	0.554609	0.817657	0.0297004	hypo	0
chr7	135806105	137528143	9313	-0.234661	0.574985	0.809645	0.0303768	hypo	0
chr10	129951963	130830071	9045	-0.233154	0.566058	0.799213	0.029463	hypo	0
chr11	102972111	104806570	8913	-0.257171	0.581778	0.838949	0.0319407	hypo	0
chr12	58343707	59991177	7989	-0.271011	0.544096	0.815106	0.0301694	hypo	0
chr10	25021132	26497144	9403	-0.237582	0.567577	0.80516	0.0315857	hypo	0
chr1	215796379	217305758	8522	-0.270844	0.541323	0.812167	0.0322258	hypo	0
chr10	127601844	128615884	8499	-0.24922	0.564574	0.813794	0.0298802	hypo	0
chr2	7053393	8366234	10293	-0.204094	0.645083	0.849177	0.0294752	hypo	0
chr6	114295460	116265829	8473	-0.271369	0.531892	0.803261	0.0325015	hypo	0
chr20	8119930	9484784	7996	-0.260696	0.571703	0.832398	0.0297856	hypo	0
chr4	124528892	126230599	7695	-0.273629	0.554043	0.827672	0.0299186	hypo	0
chr12	90355824	92398984	9390	-0.229413	0.617262	0.846675	0.0303421	hypo	0
chr3	191125028	192630223	9079	-0.250766	0.564211	0.814978	0.0327479	hypo	0
chr18	5899786	7112698	9444	-0.229731	0.61089	0.840621	0.03086	hypo	0
chr17	71313035	72195847	10445	-0.218685	0.590178	0.808863	0.0327467	hypo	0
chr19	30722213	31837116	10865	-0.249269	0.560387	0.809656	0.0383134	hypo	0
chr13	36054303	37387318	8913	-0.246675	0.563326	0.810001	0.0318751	hypo	0
chr7	157491052	158378722	11972	-0.179869	0.651302	0.831171	0.0309658	hypo	0
chr3	661684	2134048	7670	-0.294851	0.51984	0.814692	0.0324668	hypo	0
chr1	14145862	15245973	10008	-0.223972	0.584512	0.808484	0.0323219	hypo	0
chr18	70539342	71811792	8363	-0.251211	0.577749	0.82896	0.0301457	hypo	0
chr7	131242180	132257448	8426	-0.250238	0.547364	0.797603	0.0303507	hypo	0
chr6	127848799	129889879	10404	-0.238555	0.596129	0.834683	0.037431	hypo	0
chr16	51193143	52576656	8518	-0.262471	0.507006	0.769477	0.0325124	hypo	0
chr20	11876698	13198791	7182	-0.281105	0.530328	0.811433	0.0293789	hypo	0
chr4	156685862	158137638	7592	-0.274026	0.551646	0.825671	0.0303857	hypo	0
chr21	17263419	18745773	7319	-0.28263	0.550485	0.833115	0.0300927	hypo	0
chrX	85310230	88454221	12359	-0.254671	0.505799	0.760469	0.0457168	hypo	0
chr10	72650795	73488988	8810	-0.226666	0.586789	0.813455	0.0294137	hypo	0
chr12	129461942	130387499	8801	-0.240351	0.564172	0.804523	0.0310785	hypo	0
chr5	1890219	2738416	10380	-0.206857	0.598917	0.805774	0.0315034	hypo	0
chr16	9222302	10380785	9591	-0.223459	0.553597	0.777056	0.0315558	hypo	0
chr5	135524242	137000481	8120	-0.262662	0.528014	0.790676	0.0314268	hypo	0
chr2	155557450	157178513	7303	-0.287573	0.531009	0.818582	0.0311487	hypo	0
chr2	209231504	210864526	7743	-0.26315	0.55323	0.816379	0.0302517	hypo	0
chr12	83989282	85665837	7249	-0.281394	0.507323	0.788718	0.0301859	hypo	0
chr3	10358672	11312723	9262	-0.228247	0.551537	0.779785	0.0313922	hypo	0
chr2	5797557	6992886	9188	-0.224572	0.589588	0.81416	0.0310358	hypo	0
chr14	39908884	42069642	8950	-0.253296	0.556265	0.809561	0.0350711	hypo	0
chr4	172577224	174070433	7798	-0.256242	0.581375	0.837617	0.0298877	hypo	0
chr10	28970487	30020943	8791	-0.229486	0.600785	0.830271	0.0311874	hypo	0
chr3	62367178	63801579	8129	-0.260351	0.532491	0.792841	0.0318275	hypo	0
chr7	50516965	51447105	8628	-0.244444	0.570447	0.814891	0.0324107	hypo	0
chr20	10658615	11866032	6877	-0.280776	0.53661	0.817386	0.029077	hypo	0
chr1	72757765	74661518	7736	-0.287159	0.525355	0.812514	0.0341735	hypo	0
chr12	118857931	120029973	8497	-0.238705	0.527973	0.766678	0.0307937	hypo	0
chr7	155608107	156402265	9451	-0.210652	0.613783	0.824435	0.0302368	hypo	0
chr2	236409836	237069517	9369	-0.205735	0.629333	0.835069	0.0294805	hypo	0
chr3	174969703	176726239	8611	-0.271001	0.564288	0.835288	0.0378165	hypo	0
chr3	177066476	178737588	9391	-0.224237	0.622674	0.846911	0.0322148	hypo	0
chr14	62269883	63833929	8571	-0.23804	0.568506	0.806546	0.031224	hypo	0
chr4	149370507	150995458	7093	-0.284766	0.536215	0.82098	0.0313537	hypo	0
chr1	68977053	70607754	7006	-0.294439	0.516548	0.810986	0.0319405	hypo	0
chr10	116856408	118028685	6800	-0.278245	0.529976	0.808221	0.0292751	hypo	0
chr22	34323838	35644360	8788	-0.236834	0.554029	0.790864	0.0325501	hypo	0
chr20	23976599	24933874	8055	-0.238128	0.581052	0.819179	0.0300262	hypo	0
chr19	28324477	29690832	9614	-0.256779	0.528069	0.784848	0.0382505	hypo	0
chr15	92398895	93347728	8736	-0.230022	0.588224	0.818245	0.0316872	hypo	0
chr9	80955787	82182391	7133	-0.277402	0.57498	0.852381	0.0309062	hypo	0
chr13	86910472	88320333	6690	-0.287923	0.543811	0.831734	0.0300526	hypo	0
chr15	33020369	34153203	8954	-0.214203	0.619602	0.833805	0.0300808	hypo	0
chr4	158146129	159601603	7221	-0.266047	0.531817	0.797864	0.0302325	hypo	0
chr1	101878940	103785121	8108	-0.254483	0.538173	0.792656	0.0326766	hypo	0
chr22	27152321	28065973	8881	-0.228315	0.557743	0.786058	0.0321469	hypo	0
chr10	18972054	20104124	6549	-0.284569	0.537925	0.822494	0.0295125	hypo	0
chr3	139118041	140645802	8182	-0.25285	0.546617	0.799466	0.0333213	hypo	0
chr16	13000643	14009816	7849	-0.253239	0.559703	0.812942	0.0316828	hypo	0
chr13	101327917	102564402	8064	-0.235155	0.575955	0.81111	0.0303727	hypo	0
chr21	38897422	39866588	7935	-0.239329	0.544777	0.784106	0.0306437	hypo	0
chr10	58126555	59954796	7978	-0.253886	0.544294	0.79818	0.033348	hypo	0
chrX	143559043	145883086	11557	-0.24823	0.508855	0.757085	0.0456878	hypo	0
chr12	2166985	2897882	7993	-0.235485	0.582825	0.818311	0.0302664	hypo	0
chr1	157109703	158976876	9874	-0.210654	0.600073	0.810726	0.0338865	hypo	0
chr8	31042106	32401484	7412	-0.266013	0.520989	0.787001	0.031708	hypo	0
chr1	98522934	100173293	7598	-0.267615	0.548079	0.815694	0.0329721	hypo	0
chr20	57624189	58510853	8819	-0.209537	0.570943	0.78048	0.0304219	hypo	0
chr12	52503517	53398088	8255	-0.229647	0.538869	0.768515	0.0312838	hypo	0
chr11	55660779	57080643	7383	-0.263702	0.512035	0.775737	0.0317742	hypo	0
chr7	94290398	95751189	7684	-0.245128	0.587673	0.832801	0.0306438	hypo	0
chr1	95717178	97185232	7088	-0.278092	0.538893	0.816985	0.0323478	hypo	0
chr17	5490092	6345806	8670	-0.221651	0.570797	0.792448	0.0314561	hypo	0
chr22	47581567	48481906	9774	-0.194777	0.628423	0.8232	0.0311802	hypo	0
chr14	33410628	34418110	6919	-0.264969	0.570395	0.835365	0.030167	hypo	0
chr8	97355080	98620950	7208	-0.267718	0.576763	0.844481	0.031831	hypo	0
chr13	34532138	36039877	7801	-0.252179	0.586441	0.838621	0.0335278	hypo	0
chr6	155747334	156983473	8471	-0.224502	0.625364	0.849866	0.031708	hypo	0
chr4	142574592	144097825	6689	-0.260788	0.572745	0.833533	0.0289879	hypo	0
chr10	23987517	25007320	7592	-0.232913	0.589044	0.821957	0.029635	hypo	0
chr2	214172734	215576127	6703	-0.262729	0.565671	0.8284	0.0294075	hypo	0
chr1	7026017	7760717	8720	-0.214247	0.602738	0.816985	0.0313011	hypo	0
chr8	114449475	116428577	9233	-0.214198	0.624733	0.838931	0.0334503	hypo	0
chr3	147144980	148706488	7215	-0.261142	0.546932	0.808074	0.03159	hypo	0
chr19	31848907	32838136	8726	-0.26426	0.557381	0.821641	0.0388078	hypo	0
chr5	2758275	3586335	8777	-0.214675	0.579299	0.793974	0.0317592	hypo	0
chr11	70246518	70957357	9988	-0.185277	0.626121	0.811398	0.0314058	hypo	0
chr2	29353221	30363690	7373	-0.235958	0.580728	0.816686	0.029592	hypo	0
chrX	140788747	143163055	11238	-0.238866	0.531783	0.770649	0.0458528	hypo	0
chr2	947834	1744847	8628	-0.201229	0.625856	0.827085	0.0299465	hypo	0
chr5	119804943	121292088	6442	-0.288423	0.526888	0.815312	0.0320941	hypo	0
chr15	46002291	47386460	6345	-0.28387	0.511662	0.795532	0.0311676	hypo	0
chr11	114318068	115368210	6926	-0.262556	0.548837	0.811393	0.0315352	hypo	0
chr11	115380433	116441462	8350	-0.218457	0.550509	0.768966	0.0316321	hypo	0
chr8	107748775	109091878	6999	-0.266109	0.5634	0.829509	0.0321438	hypo	0
chr8	77931001	79428962	6401	-0.288101	0.519586	0.807688	0.0318592	hypo	0
chr4	4874374	5708295	6545	-0.260311	0.575147	0.835458	0.0297147	hypo	0
chr6	64457264	66010973	6489	-0.28974	0.537039	0.826779	0.0328129	hypo	0
chr6	97733744	99270703	7040	-0.265081	0.535317	0.800398	0.0326041	hypo	0
chr6	94136310	95679923	6458	-0.281534	0.526786	0.80832	0.0316519	hypo	0
chr13	74715378	76048466	7110	-0.239735	0.59297	0.832705	0.0297269	hypo	0
chr16	86609637	87306878	9317	-0.193356	0.599612	0.792968	0.0315408	hypo	0
chr13	96746278	97875580	6564	-0.265724	0.544704	0.810428	0.0306831	hypo	0
chr9	89567506	90526556	7538	-0.23272	0.580826	0.813546	0.0309267	hypo	0
chr8	58056007	59321176	7584	-0.242217	0.593718	0.835935	0.0328069	hypo	0
chr14	38071776	39486072	6529	-0.26744	0.510785	0.778225	0.0310821	hypo	0
chr4	11440244	12635369	5991	-0.277585	0.542949	0.820534	0.029381	hypo	0
chr3	154044955	155456694	6870	-0.274461	0.561092	0.835554	0.0339406	hypo	0
chr5	58338574	59865055	7562	-0.236409	0.616651	0.85306	0.031927	hypo	0
chr11	121504164	122584750	7595	-0.235001	0.570345	0.805346	0.0317093	hypo	0
chr3	161094726	162525583	6164	-0.294335	0.520684	0.815019	0.0321486	hypo	0
chr8	23573383	24768669	6967	-0.256398	0.553334	0.809733	0.0317206	hypo	0
chr12	81336782	82741445	6228	-0.274779	0.510986	0.785765	0.030799	hypo	0
chr1	152090542	153508685	7428	-0.244069	0.526111	0.770179	0.0327105	hypo	0
chr12	13258451	14386969	7369	-0.231445	0.584472	0.815917	0.0305427	hypo	0
chr12	70765777	72002311	6545	-0.260036	0.557986	0.818022	0.0305918	hypo	0
chr4	30726849	31818539	5905	-0.281637	0.547383	0.82902	0.0299307	hypo	0
chr4	13634688	14998715	6829	-0.240541	0.592764	0.833305	0.0298527	hypo	0
chr10	112840675	113910939	6057	-0.270251	0.529756	0.800007	0.0295764	hypo	0
chr3	55523316	56585519	6861	-0.257644	0.56072	0.818365	0.0323431	hypo	0
chr6	168844646	169609871	8631	-0.20842	0.627329	0.835749	0.0326146	hypo	0
chr4	111562518	113057188	6804	-0.251464	0.556347	0.807811	0.0310428	hypo	0
chr5	50689009	52085951	6374	-0.272352	0.52042	0.792772	0.0314119	hypo	0
chr5	169732975	170732494	7047	-0.24498	0.55593	0.80091	0.0313082	hypo	0
chr3	67717746	69028594	6843	-0.256069	0.546775	0.802844	0.0316767	hypo	0
chr1	245139709	246025436	9974	-0.170799	0.685571	0.85637	0.0309346	hypo	0
chr17	14211717	15161171	7288	-0.241738	0.590972	0.832709	0.0321789	hypo	0
chr1	231755581	232725837	7444	-0.235857	0.616902	0.852758	0.032219	hypo	0
chr12	5547566	6336082	7385	-0.231277	0.576717	0.807993	0.0314624	hypo	0
chr18	21981655	22926703	6709	-0.241224	0.588797	0.830021	0.0301365	hypo	0
chr12	99125862	100417522	6956	-0.235867	0.560626	0.796493	0.0308856	hypo	0
chr10	6277142	7194912	8031	-0.192109	0.630453	0.822562	0.0288683	hypo	0
chr10	60273643	61458869	6011	-0.26788	0.532832	0.800712	0.0307412	hypo	0
chr1	71547398	72747200	5503	-0.304134	0.543146	0.847281	0.0312204	hypo	0
chr2	107508054	108442308	5393	-0.294921	0.540254	0.835175	0.0297862	hypo	0
chr14	100845817	101535084	8621	-0.187221	0.626595	0.813816	0.0305674	hypo	0
chr10	118034031	118886914	6788	-0.232069	0.566439	0.798508	0.0302591	hypo	0
chr21	28222286	29227019	5649	-0.283819	0.516921	0.80074	0.0305672	hypo	0
chr3	2148010	3169547	7047	-0.243145	0.581671	0.824816	0.0327557	hypo	0
chr5	96522142	98102397	6330	-0.261971	0.55765	0.819622	0.0315505	hypo	0
chr4	58436390	59738686	5621	-0.282398	0.525066	0.807464	0.0303395	hypo	0
chr8	119129962	120647300	8217	-0.224287	0.610152	0.834439	0.0368336	hypo	0
chr6	46129344	47377536	7254	-0.227081	0.603492	0.830573	0.0313726	hypo	0
chr8	89341939	90756064	5706	-0.28905	0.522769	0.81182	0.0314322	hypo	0
chr6	146285476	147516853	6381	-0.263373	0.55196	0.815333	0.0321645	hypo	0
chr15	91569789	92398253	6109	-0.258502	0.546014	0.804515	0.0305861	hypo	0
chr6	50819870	52123884	6215	-0.269592	0.54225	0.811843	0.0321333	hypo	0
chr7	121956645	123168395	5648	-0.283372	0.516459	0.799831	0.0307495	hypo	0
chr1	76274532	77563963	6739	-0.250113	0.580915	0.831028	0.0326838	hypo	0
chr21	36423927	37403632	7213	-0.213458	0.625727	0.839185	0.029566	hypo	0
chrX	120120740	122707244	10310	-0.23175	0.525251	0.757001	0.0460404	hypo	0
chr17	53558861	54666106	6446	-0.259539	0.576895	0.836434	0.0324283	hypo	0
chr20	55209494	55835350	7753	-0.200059	0.557958	0.758017	0.0300176	hypo	0
chr13	76430089	77557825	5923	-0.262506	0.563342	0.825848	0.0301765	hypo	0
chr15	47397795	48441133	6023	-0.258139	0.562199	0.820338	0.0309543	hypo	0
chr7	152566700	153402798	6540	-0.250282	0.555438	0.80572	0.0322237	hypo	0
chr3	134521350	135852025	7236	-0.221829	0.612084	0.833913	0.0313789	hypo	0
chr10	114716438	115431610	6772	-0.216128	0.62066	0.836788	0.028622	hypo	0
chr5	44827861	46405241	7056	-0.243962	0.509556	0.753518	0.0347101	hypo	0
chr6	119782235	121421359	6830	-0.24175	0.601278	0.843029	0.0325503	hypo	0
chr5	168010148	168724841	6173	-0.256303	0.579916	0.836219	0.0311716	hypo	0
chr3	18492650	19973234	6697	-0.238527	0.611935	0.850462	0.0313747	hypo	0
chr14	29253122	30393546	6087	-0.263594	0.549985	0.813579	0.0323107	hypo	0
chr11	4386449	5610803	6579	-0.244757	0.565223	0.80998	0.032109	hypo	0
chr13	37638575	38913355	6305	-0.254345	0.54956	0.803904	0.0325189	hypo	0
chr18	74965084	75721165	6929	-0.22251	0.584692	0.807202	0.0306964	hypo	0
chr8	126449445	127568549	7273	-0.219988	0.607553	0.827541	0.0317703	hypo	0
chr11	130791399	131561584	6331	-0.245117	0.5314	0.776517	0.0311105	hypo	0
chr1	3995360	4705822	7559	-0.215511	0.580761	0.796272	0.0330498	hypo	0
chr15	62687656	63337058	6255	-0.237632	0.62246	0.860092	0.0298163	hypo	0
chr5	17599579	18702635	5615	-0.275365	0.567057	0.842422	0.0309966	hypo	0
chrX	136660387	138768249	9263	-0.245614	0.516675	0.762289	0.0456864	hypo	0
chr18	66391642	67500494	6269	-0.244545	0.574683	0.819228	0.0309666	hypo	0
chr5	91686377	92902953	5632	-0.276537	0.535804	0.812341	0.0313255	hypo	0
chr9	108545341	109616874	5499	-0.279386	0.574128	0.853513	0.0311453	hypo	0
chr11	78289979	79146308	6181	-0.25339	0.548386	0.801776	0.0318465	hypo	0
chr2	65666216	66649928	6126	-0.238801	0.596378	0.835179	0.0295443	hypo	0
chr4	86406373	87808380	7137	-0.209826	0.635777	0.845604	0.0316781	hypo	0
chr8	122659496	123787261	6411	-0.25622	0.578789	0.835009	0.0335384	hypo	0
chr9	25684137	26826141	5540	-0.277276	0.531672	0.808948	0.0313323	hypo	0
chr8	46839402	48101154	8323	-0.19316	0.552087	0.745247	0.0329082	hypo	0
chr5	124349157	125788271	7043	-0.233304	0.621282	0.854586	0.0338263	hypo	0
chr9	110403491	111260176	5567	-0.269798	0.580258	0.850055	0.0310728	hypo	0
chr1	57891420	58934675	5991	-0.257627	0.566742	0.824369	0.0318742	hypo	0
chr8	76324354	77585067	5678	-0.27838	0.535207	0.813587	0.033002	hypo	0
chr12	3071082	3717653	7742	-0.189202	0.587003	0.776204	0.0304686	hypo	0
chr2	71672568	72365120	5883	-0.242774	0.564585	0.80736	0.0296128	hypo	0
chr4	70161708	71557171	6018	-0.247393	0.550225	0.797618	0.0323604	hypo	0
chr11	105957571	107142307	5799	-0.259311	0.534975	0.794286	0.0314964	hypo	0
chr6	71998992	73304128	6207	-0.239882	0.568264	0.808146	0.031245	hypo	0
chr2	194701676	196088791	5720	-0.268135	0.567459	0.835594	0.0327647	hypo	0
chr6	81066601	82453153	5293	-0.285628	0.528498	0.814126	0.03211	hypo	0
chr6	153455993	154489369	5724	-0.264587	0.5391	0.803687	0.0322281	hypo	0
chr8	64134999	65280217	5396	-0.279439	0.532737	0.812176	0.0318689	hypo	0
chr8	18082653	18866601	6143	-0.242215	0.608451	0.850666	0.031473	hypo	0
chr3	181449775	182452329	6513	-0.234617	0.605075	0.839691	0.0327243	hypo	0
chr5	173403525	174145323	6634	-0.221314	0.559668	0.780982	0.0313258	hypo	0
chr1	87923243	89141395	6514	-0.22293	0.643838	0.866767	0.0309214	hypo	0
chr4	104126321	105618859	5803	-0.241083	0.551834	0.792917	0.0300376	hypo	0
chr22	43582443	44201810	7309	-0.196583	0.613425	0.810008	0.030623	hypo	0
chr6	74405621	75909433	6403	-0.245589	0.573087	0.818675	0.0347369	hypo	0
chr20	56286732	56804158	5915	-0.223376	0.582996	0.806371	0.0283289	hypo	0
chr12	88585054	89738851	5515	-0.254406	0.567516	0.821922	0.0300687	hypo	0
chr11	134284332	134946283	6018	-0.242398	0.548272	0.790671	0.0316193	hypo	0
chr4	177263488	178228653	5620	-0.242012	0.565031	0.807044	0.0293968	hypo	0
chr8	62630044	63923529	6236	-0.255318	0.560832	0.81615	0.0354975	hypo	0
chr5	30499749	31394188	5109	-0.280144	0.529083	0.809227	0.0310331	hypo	0
chr12	105774372	106630786	5716	-0.241317	0.575288	0.816605	0.0298145	hypo	0
chr17	64304417	65065113	8153	-0.190008	0.652464	0.842472	0.0339468	hypo	0
chr15	38859048	39870801	5998	-0.230861	0.589761	0.820622	0.0301314	hypo	0
chr10	62569204	63634889	6044	-0.223769	0.608255	0.832024	0.0295372	hypo	0
chr10	54076087	55253571	5754	-0.26005	0.55817	0.81822	0.0336086	hypo	0
chr20	21697688	22541981	5102	-0.264286	0.527808	0.792094	0.0295606	hypo	0
chr12	130652740	131197698	7122	-0.198647	0.606371	0.805018	0.030999	hypo	0
chr12	42984691	44116367	5949	-0.236235	0.585428	0.821663	0.0309285	hypo	0
chr10	121713634	122602736	5804	-0.238705	0.566805	0.80551	0.0305672	hypo	0
chr10	122713980	123356514	5749	-0.230778	0.576631	0.807409	0.0292684	hypo	0
chr5	39086384	40390631	6795	-0.209122	0.63477	0.843892	0.0314767	hypo	0
chr6	49521360	50674062	5277	-0.282632	0.516319	0.798951	0.0333037	hypo	0
chr5	65491152	66458592	6022	-0.2403	0.611462	0.851761	0.0321415	hypo	0
chr6	112418513	113864427	7053	-0.220393	0.624703	0.845096	0.0346624	hypo	0
chr12	33056609	34318497	5391	-0.252285	0.526701	0.778986	0.0307102	hypo	0
chr7	11213378	12249152	4990	-0.281643	0.536544	0.818187	0.0314436	hypo	0
chr5	155188903	156270057	5849	-0.253029	0.562747	0.815777	0.0332997	hypo	0
chr11	104831868	105862615	5248	-0.267489	0.562256	0.829745	0.0311521	hypo	0
chr9	87287865	88157269	5888	-0.23379	0.596088	0.829879	0.0306265	hypo	0
chr5	129248269	130482369	5161	-0.277468	0.56893	0.846399	0.0322261	hypo	0
chr5	100280589	101621149	5563	-0.251273	0.577801	0.829074	0.0315475	hypo	0
chr13	25919953	26620737	5933	-0.230738	0.579032	0.80977	0.0309703	hypo	0
chr9	128730105	129372603	7262	-0.186143	0.624155	0.810298	0.0302169	hypo	0
chr6	147835299	148659168	6019	-0.242102	0.592067	0.834169	0.0326502	hypo	0
chr7	114691035	115847787	5287	-0.253186	0.595302	0.848488	0.0299817	hypo	0
chrX	126537465	128645833	8142	-0.251513	0.500214	0.751728	0.0458497	hypo	0
chr10	52548284	53455778	4665	-0.275273	0.530287	0.80556	0.0289836	hypo	0
chr18	3667064	4448097	5619	-0.242714	0.563403	0.806117	0.0311371	hypo	0
chr9	73352986	74294787	5021	-0.267955	0.540417	0.808372	0.0305182	hypo	0
chr9	83278990	84211305	4954	-0.284346	0.552905	0.837251	0.0327001	hypo	0
chr1	247581030	248587454	6010	-0.235309	0.576432	0.811741	0.0323477	hypo	0
chr4	132883604	134064754	4747	-0.286131	0.534818	0.820949	0.0312939	hypo	0
chr20	16724664	17544771	5224	-0.24124	0.520291	0.761532	0.0289842	hypo	0
chr2	5118838	5764690	4941	-0.263759	0.550121	0.81388	0.029756	hypo	0
chr14	37140045	38051914	4977	-0.271932	0.526412	0.798344	0.0316759	hypo	0
chr18	42318212	43407176	6897	-0.197169	0.658553	0.855722	0.0311143	hypo	0
chr2	185635325	187113673	5916	-0.236405	0.614574	0.850978	0.0347143	hypo	0
chr2	235863589	236407294	6018	-0.217904	0.589365	0.807269	0.0302774	hypo	0
chr12	117802119	118449108	5833	-0.223538	0.564049	0.787587	0.0298169	hypo	0
chr5	72921738	73928619	6488	-0.206048	0.62654	0.832589	0.0306278	hypo	0
chrX	124342634	126527305	8062	-0.246909	0.49421	0.741119	0.0456521	hypo	0
chr12	44254322	45568298	6477	-0.201143	0.641891	0.843033	0.0300083	hypo	0
chr10	306992	842042	7979	-0.156755	0.680753	0.837508	0.0289062	hypo	0
chr8	116678190	117645480	5519	-0.259255	0.582427	0.841682	0.0330412	hypo	0
chr20	9497982	10385127	5166	-0.245932	0.544928	0.79086	0.0297206	hypo	0
chr15	35850914	36862014	5303	-0.252398	0.576026	0.828423	0.0311852	hypo	0
chr4	79864993	80931921	4709	-0.267564	0.573594	0.841158	0.0292655	hypo	0
chr22	26132052	26818443	6059	-0.221523	0.559117	0.78064	0.0315043	hypo	0
chr7	123394803	124466215	5121	-0.25718	0.535073	0.792253	0.0310465	hypo	0
chr12	19706515	20521746	4715	-0.269901	0.559675	0.829576	0.0300911	hypo	0
chr5	5503292	6355710	6716	-0.195972	0.624399	0.820371	0.0310602	hypo	0
chr1	181456281	182360634	5692	-0.235581	0.569018	0.8046	0.0320622	hypo	0
chr20	46535467	47120165	5243	-0.23404	0.589861	0.823901	0.0291995	hypo	0
chr18	53259916	54269488	5964	-0.228176	0.635728	0.863904	0.0328011	hypo	0
chr2	237471312	237988856	5618	-0.224017	0.60791	0.831927	0.0297838	hypo	0
chr9	91152525	91914883	5631	-0.231809	0.564526	0.796334	0.031037	hypo	0
chr16	49319717	49888169	6192	-0.21925	0.575403	0.794654	0.0326656	hypo	0
chr6	696752	1310892	6219	-0.211052	0.596581	0.807633	0.0312492	hypo	0
chr8	72750400	73920255	6104	-0.22242	0.542942	0.765362	0.0326232	hypo	0
chr1	2999417	3493083	7939	-0.166043	0.642181	0.808224	0.031804	hypo	0
chr1	233470816	234345908	6005	-0.225091	0.58118	0.806271	0.0324525	hypo	0
chr4	84463533	85402408	4892	-0.254342	0.548454	0.802796	0.0300104	hypo	0
chr2	184093036	185462737	5580	-0.260532	0.576889	0.837421	0.0378708	hypo	0
chr6	121763394	122738978	5037	-0.258821	0.560378	0.819199	0.0313808	hypo	0
chr4	147576357	148539101	5033	-0.244117	0.55876	0.802877	0.029756	hypo	0
chr15	37402676	38358319	4633	-0.274752	0.544647	0.819399	0.0307501	hypo	0
chr5	174165462	174867870	5212	-0.254889	0.53645	0.791339	0.0325442	hypo	0
chr8	129218622	130584481	6857	-0.195367	0.665865	0.861231	0.0324147	hypo	0
chr12	128756280	129269187	5390	-0.228685	0.560807	0.789492	0.0299493	hypo	0
chr7	29001560	29716370	5271	-0.247204	0.578283	0.825487	0.0320441	hypo	0
chr11	123614581	124490178	5043	-0.254127	0.558727	0.812853	0.0315131	hypo	0
chr8	134589353	135467572	5437	-0.239427	0.610329	0.849756	0.0316987	hypo	0
chr2	238008714	238593050	6133	-0.200022	0.595658	0.79568	0.0303547	hypo	0
chr14	94567628	95231990	5595	-0.226001	0.56056	0.786561	0.0310818	hypo	0
chr12	111182643	111802043	6983	-0.177909	0.632851	0.81076	0.030828	hypo	0
chr8	133854799	134508974	6019	-0.215193	0.611947	0.82714	0.0321518	hypo	0
chr7	116864987	117831805	5367	-0.233597	0.574228	0.807825	0.0312081	hypo	0
chr1	36930362	37500423	5507	-0.234539	0.521771	0.756311	0.0320352	hypo	0
chr11	108821945	109857862	4946	-0.255263	0.555347	0.81061	0.0311573	hypo	0
chr7	48141448	48895249	4216	-0.28446	0.551144	0.835605	0.0297578	hypo	0
chr2	165699370	166638072	4783	-0.251531	0.593194	0.844725	0.0300247	hypo	0
chr21	29427843	30246621	4140	-0.289091	0.543833	0.832924	0.0298804	hypo	0
chr7	25222516	25892029	4618	-0.261351	0.570779	0.832131	0.0301371	hypo	0
chr17	12053173	12894917	7139	-0.19122	0.639141	0.830362	0.0346765	hypo	0
chr13	110445313	110953493	5257	-0.224595	0.575805	0.8004	0.0294971	hypo	0
chr13	72445974	73277193	4253	-0.282024	0.543966	0.82599	0.0301124	hypo	0
chr5	127532398	128428849	4683	-0.266492	0.546268	0.81276	0.0314234	hypo	0
chr4	85507750	86396434	4659	-0.257303	0.594086	0.851389	0.0305278	hypo	0
chr6	12347764	13251302	6469	-0.194005	0.635727	0.829732	0.0314395	hypo	0
chr4	120996009	121990076	4591	-0.264244	0.542856	0.8071	0.0307307	hypo	0
chr1	33960901	34632123	5202	-0.248129	0.548016	0.796145	0.0325409	hypo	0
chr4	5714711	6197949	5728	-0.20067	0.579865	0.780535	0.0289635	hypo	0
chr2	100111669	100696827	5132	-0.225222	0.687595	0.912817	0.0292096	hypo	0
chr4	100876131	101956418	4925	-0.23723	0.612977	0.850207	0.0296253	hypo	0
chr2	150428090	151337636	4529	-0.268108	0.531791	0.7999	0.0310434	hypo	0
chr4	90037589	91047852	5242	-0.233205	0.600765	0.83397	0.0315044	hypo	0
chr15	71408645	72114997	5553	-0.21644	0.595942	0.812383	0.0306345	hypo	0
chr16	54326507	54959945	5359	-0.235506	0.545058	0.780564	0.0326767	hypo	0
chr2	240328960	240783667	5590	-0.204217	0.630077	0.834294	0.029143	hypo	0
chr16	86034906	86527760	6286	-0.196853	0.550219	0.747071	0.0316611	hypo	0
chrX	80634521	82754218	7516	-0.243829	0.492174	0.736003	0.0469778	hypo	0
chr6	63000814	64273917	6130	-0.211859	0.636445	0.848304	0.0335801	hypo	0
chr8	75274521	76313115	4801	-0.267147	0.555446	0.822593	0.0331911	hypo	0
chr20	45324668	45832488	5350	-0.212269	0.583203	0.795473	0.0294369	hypo	0
chr10	13943101	14546563	5783	-0.194702	0.623666	0.818367	0.0290883	hypo	0
chr9	1056172	2012772	5442	-0.215133	0.597237	0.812369	0.0299987	hypo	0
chr7	48964913	49811801	4109	-0.285955	0.499488	0.785443	0.0302593	hypo	0
chr1	60329515	61236419	4460	-0.273751	0.551484	0.825235	0.0315307	hypo	0
chr2	223807547	224616773	4938	-0.235577	0.572419	0.807996	0.030077	hypo	0
chr15	58020831	58841813	6018	-0.195067	0.626092	0.821159	0.0303321	hypo	0
chr10	126852074	127403197	4859	-0.229459	0.595217	0.824676	0.0287845	hypo	0
chr1	210519657	211427129	5550	-0.222591	0.617604	0.840194	0.0319292	hypo	0
chr1	64135451	64929502	5175	-0.234217	0.598005	0.832222	0.0314141	hypo	0
chr3	158549925	159476233	4437	-0.275988	0.538756	0.814744	0.0317147	hypo	0
chr9	19414775	20359368	5382	-0.218495	0.606692	0.825187	0.0304852	hypo	0
chr3	64018099	64668011	4629	-0.259579	0.549927	0.809506	0.031051	hypo	0
chr9	94189897	94789261	5700	-0.205264	0.621006	0.82627	0.030318	hypo	0
chr8	96287471	97154668	4764	-0.259617	0.56767	0.827287	0.0322382	hypo	0
chr13	47368615	48498974	5523	-0.210947	0.626414	0.837362	0.0301628	hypo	0
chr11	119603890	120199969	5873	-0.206326	0.544916	0.751241	0.0318544	hypo	0
chr10	30028484	30592478	5048	-0.226094	0.5935	0.819594	0.0303704	hypo	0
chr3	61554474	62348949	6486	-0.220379	0.628948	0.849327	0.0386888	hypo	0
chr12	108239138	108906480	4783	-0.238753	0.518477	0.75723	0.0303858	hypo	0
chr4	144839296	145906024	4750	-0.238956	0.596854	0.83581	0.0301644	hypo	0
chr5	66514700	67500566	5193	-0.225361	0.640886	0.866247	0.030913	hypo	0
chr11	117281553	117744208	5434	-0.216463	0.59483	0.811293	0.0310852	hypo	0
chr4	187118358	187637929	5508	-0.213913	0.625554	0.839468	0.0312553	hypo	0
chr1	115321064	116200878	4804	-0.250481	0.553583	0.804064	0.0323668	hypo	0
chrX	97954523	99658998	6423	-0.267337	0.494112	0.761449	0.0454878	hypo	0
chr22	33090251	33695640	5329	-0.221822	0.58992	0.811742	0.0316847	hypo	0
chr2	222443760	223153665	4399	-0.263442	0.531024	0.794467	0.0314766	hypo	0
chr7	112582664	113719805	4758	-0.25197	0.542581	0.794552	0.0329928	hypo	0
chr10	91541599	92619517	4885	-0.232536	0.582412	0.814948	0.0306096	hypo	0
chr13	22660384	23488633	5779	-0.197276	0.637318	0.834593	0.031288	hypo	0
chr2	118884088	119590621	4816	-0.236506	0.517603	0.754109	0.0307412	hypo	0
chr11	101110859	101979175	4672	-0.25424	0.535306	0.789546	0.0321392	hypo	0
chr14	22008624	22891835	5309	-0.209946	0.58607	0.796017	0.0299372	hypo	0
chr13	29392734	30080734	4741	-0.234437	0.569936	0.804373	0.029953	hypo	0
chr20	31446183	31934457	4874	-0.218374	0.612971	0.831345	0.0286521	hypo	0
chr4	186453166	187024587	5680	-0.194871	0.626365	0.821236	0.0302015	hypo	0
chr12	29938066	30774973	4415	-0.255093	0.538392	0.793485	0.0306358	hypo	0
chrX	67778038	69346119	7662	-0.222711	0.531957	0.754668	0.0464781	hypo	0
chr11	130189611	130732130	5021	-0.228286	0.582859	0.811145	0.0312398	hypo	0
chr13	40328901	41231800	6691	-0.1769	0.667035	0.843935	0.0329635	hypo	0
chr16	17568614	18196549	4870	-0.235328	0.590344	0.825672	0.0311905	hypo	0
chr9	116363299	116918066	5183	-0.222327	0.591961	0.814288	0.0320804	hypo	0
chr2	151347358	152108762	4212	-0.258658	0.562198	0.820856	0.0298036	hypo	0
chr1	34632868	35319705	4774	-0.240865	0.538913	0.779778	0.0316662	hypo	0
chr8	121830363	122654961	4633	-0.256673	0.57245	0.829123	0.0326052	hypo	0
chr10	61668068	62538861	5377	-0.204441	0.646036	0.850477	0.030273	hypo	0
chr16	34188403	35285707	5881	-0.205606	0.462308	0.667914	0.0334445	hypo	0
chr5	43713930	44795796	4185	-0.271461	0.527594	0.799055	0.0312335	hypo	0
chr21	27547804	28213746	4224	-0.255452	0.566063	0.821515	0.0296101	hypo	0
chr3	167978009	168866124	4246	-0.278928	0.548997	0.827925	0.0326987	hypo	0
chr14	28324438	29223516	3959	-0.293818	0.496371	0.790189	0.0324362	hypo	0
chr1	214842213	215733176	4454	-0.266278	0.530845	0.797123	0.0326653	hypo	0
chr2	235357695	235858041	4509	-0.245107	0.574475	0.819582	0.0307985	hypo	0
chr11	112119611	112827578	4569	-0.249563	0.5511	0.800662	0.0320447	hypo	0
chr4	184720007	185184717	5144	-0.207171	0.604376	0.811547	0.029679	hypo	0
chr1	213456644	214152805	4706	-0.241278	0.55978	0.801058	0.031482	hypo	0
chr2	66812813	67616749	3833	-0.283423	0.542356	0.825778	0.0301884	hypo	0
chr8	65502787	66502917	5386	-0.233454	0.593971	0.827424	0.0365382	hypo	0
chr6	44414487	45337446	5602	-0.211444	0.649568	0.861012	0.0335201	hypo	0
chr1	68158569	68943315	4971	-0.23387	0.575014	0.808884	0.0324222	hypo	0
chr7	69074017	70058763	6954	-0.153947	0.730083	0.884029	0.0299327	hypo	0
chr5	90683521	91635548	4143	-0.280623	0.538745	0.819369	0.0329487	hypo	0
chr15	81624343	82334984	4639	-0.246496	0.606535	0.853031	0.0325428	hypo	0
chr5	41945734	42944030	4554	-0.244962	0.562425	0.807387	0.0313707	hypo	0
chr7	38943510	39598030	4595	-0.235719	0.596046	0.831765	0.0304415	hypo	0
chr13	26980586	27569474	5185	-0.209303	0.568735	0.778038	0.0307648	hypo	0
chr15	100376069	100881078	5290	-0.19922	0.605331	0.804552	0.0296739	hypo	0
chr14	96197231	96745518	4946	-0.217396	0.552658	0.770055	0.0304327	hypo	0
chr22	28322482	29066939	4687	-0.249357	0.632147	0.881504	0.0332718	hypo	0
chr10	4226001	4867996	4893	-0.207521	0.644953	0.852474	0.0288787	hypo	0
chr8	71590800	72457777	4097	-0.276562	0.530131	0.806693	0.0320447	hypo	0
chr15	69752294	70340613	5144	-0.205212	0.623528	0.82874	0.0298226	hypo	0
chr18	9962603	10453434	4601	-0.235972	0.59007	0.826042	0.0309659	hypo	0
chr9	88949075	89555964	4364	-0.246501	0.566772	0.813274	0.0305951	hypo	0
chr2	180874448	181860922	4408	-0.245482	0.568554	0.814036	0.0312733	hypo	0
chr3	152899078	153837706	4805	-0.241142	0.606439	0.847581	0.0334926	hypo	0
chr10	130840746	131260729	4311	-0.234514	0.608579	0.843093	0.028927	hypo	0
chr9	113029994	113795287	4565	-0.231057	0.586105	0.817162	0.0302831	hypo	0
chr5	118874254	119800468	3954	-0.272766	0.549226	0.821993	0.0309152	hypo	0
chr10	18221642	18804118	4841	-0.206714	0.641358	0.848072	0.0286865	hypo	0
chr4	109603844	110346509	4416	-0.233032	0.594446	0.827478	0.0297806	hypo	0
chr7	121043519	121939490	4395	-0.249371	0.553264	0.802635	0.0317479	hypo	0
chr1	228786646	229393474	5240	-0.210061	0.611131	0.821192	0.0319365	hypo	0
chr17	9484134	10017067	6280	-0.179424	0.650986	0.83041	0.0331229	hypo	0
chr17	12926411	13499479	4510	-0.247247	0.569844	0.817091	0.0322749	hypo	0
chr17	77080220	77462337	5832	-0.186777	0.560773	0.747549	0.0316576	hypo	0
chrX	22123554	23348222	7211	-0.219652	0.582669	0.80232	0.0459856	hypo	0
chr5	154356662	155138547	4182	-0.260996	0.531108	0.792104	0.0315908	hypo	0
chr9	103240200	104149072	4418	-0.24342	0.552023	0.795443	0.0314347	hypo	0
chr4	139167242	139936680	4596	-0.223286	0.600389	0.823675	0.0299737	hypo	0
chr3	156900117	157811165	4443	-0.256298	0.5543	0.810598	0.0331956	hypo	0
chr2	30858903	31453922	4762	-0.247655	0.60901	0.856665	0.0350186	hypo	0
chr20	49578474	50029124	4855	-0.20301	0.586531	0.789541	0.0288508	hypo	0
chr1	118507849	119519568	4519	-0.243427	0.565903	0.809329	0.032578	hypo	0
chr6	168374430	168837538	6418	-0.172925	0.640672	0.813597	0.0326192	hypo	0
chr5	132446520	132944151	4414	-0.237917	0.604467	0.842384	0.0306146	hypo	0
chr4	36330107	37240231	4218	-0.245402	0.570531	0.815933	0.030499	hypo	0
chr9	80040627	80643209	4349	-0.240711	0.578251	0.818961	0.0308452	hypo	0
chrX	65844483	67729199	6904	-0.238718	0.516119	0.754837	0.0484454	hypo	0
chr5	40843941	41726081	4179	-0.254263	0.542671	0.796933	0.0314466	hypo	0
chr5	38261619	38938667	4894	-0.223868	0.563598	0.787466	0.0329587	hypo	0
chr5	9548971	10201658	4267	-0.248095	0.542744	0.790838	0.0312126	hypo	0
chr18	4455443	5227538	3841	-0.271967	0.507368	0.779335	0.0312809	hypo	0
chr1	218528337	219376080	4661	-0.236844	0.585974	0.822818	0.0327835	hypo	0
chr2	177206861	178074857	5242	-0.194061	0.622535	0.816596	0.0302581	hypo	0
chr13	73638096	74282899	4555	-0.22548	0.642867	0.868346	0.0309011	hypo	0
chr12	37989822	39190514	4874	-0.225095	0.517025	0.74212	0.0337042	hypo	0
chr11	30612451	31387319	3803	-0.281247	0.533467	0.814715	0.0322397	hypo	0
chr12	7353854	8065967	5241	-0.189428	0.643149	0.832577	0.0297645	hypo	0
chr8	142970142	143377342	5447	-0.195503	0.615241	0.810744	0.0323276	hypo	0
chr3	174165382	174960247	3946	-0.289769	0.553882	0.843651	0.0365638	hypo	0
chr1	159033386	159878721	4638	-0.231378	0.570993	0.802371	0.0323078	hypo	0
chr5	56561879	57323410	3975	-0.267845	0.557782	0.825627	0.0320922	hypo	0
chr5	122948153	123985948	5331	-0.190561	0.68048	0.87104	0.0307063	hypo	0
chr8	26489660	27135762	4405	-0.237004	0.547125	0.784129	0.0315068	hypo	0
chr5	157290134	158121148	5541	-0.182424	0.662901	0.845325	0.0306215	hypo	0
chr5	31558384	32091233	5677	-0.184948	0.66884	0.853788	0.03214	hypo	0
chr10	123740686	124130568	4546	-0.211521	0.583287	0.794809	0.0292003	hypo	0
chr19	42932465	43958271	5703	-0.224167	0.57724	0.801406	0.0391003	hypo	0
chr4	55528029	56206230	3950	-0.248206	0.554859	0.803065	0.0302308	hypo	0
chr3	13495997	13915960	4650	-0.223908	0.570926	0.794834	0.0319174	hypo	0
chr2	18017753	18729531	3798	-0.263492	0.514031	0.777522	0.0310417	hypo	0
chr4	24591643	25121971	4390	-0.220582	0.591442	0.812024	0.029726	hypo	0
chr10	28039253	28590001	3762	-0.255729	0.609748	0.865476	0.0296416	hypo	0
chr8	135850157	136469090	3864	-0.272185	0.512885	0.78507	0.0325036	hypo	0
chr18	22934697	23583986	4080	-0.24245	0.595551	0.838001	0.0304136	hypo	0
chr4	174458355	175131538	3851	-0.251913	0.532742	0.784654	0.0298976	hypo	0
chr8	131376285	132049442	4561	-0.232716	0.586655	0.819371	0.0327863	hypo	0
chr15	80481760	80990887	4306	-0.238126	0.574837	0.812963	0.0318748	hypo	0
chr1	20242169	20822511	5319	-0.193913	0.565633	0.759546	0.0320055	hypo	0
chr9	86624773	87280256	4671	-0.215824	0.62146	0.837285	0.0311097	hypo	0
chr3	3218776	3837245	3781	-0.274773	0.551954	0.826727	0.0323119	hypo	0
chr13	43678090	44356858	4095	-0.232554	0.611862	0.844416	0.0294232	hypo	0
chr9	3595464	4294037	4665	-0.208705	0.62852	0.837225	0.0302874	hypo	0
chr3	98622653	99528116	3873	-0.260053	0.539185	0.799239	0.0313032	hypo	0
chr6	126687675	127583794	3770	-0.272875	0.523258	0.796133	0.032331	hypo	0
chr10	125226148	125749778	4799	-0.19645	0.570389	0.766838	0.0293399	hypo	0
chr6	4142198	4771192	4828	-0.208543	0.62872	0.837263	0.0313386	hypo	0
chr8	79779022	80671577	4241	-0.241733	0.5794	0.821134	0.0320964	hypo	0
chr2	176050748	176789882	3979	-0.247514	0.590543	0.838056	0.030921	hypo	0
chr6	16774024	17392384	4784	-0.212124	0.618997	0.831121	0.0318301	hypo	0
chr14	104689991	105113744	5475	-0.181041	0.597842	0.778882	0.0314207	hypo	0
chr9	77783902	78505104	3495	-0.278883	0.540023	0.818906	0.031068	hypo	0
chr1	204547894	205049167	4760	-0.212964	0.597967	0.810931	0.0320777	hypo	0
chr5	32719559	33435148	3588	-0.281175	0.531813	0.812988	0.0316836	hypo	0
chr7	42277296	42930888	3656	-0.27469	0.522874	0.797564	0.0318456	hypo	0
chr4	141690975	142554128	4328	-0.22739	0.59434	0.82173	0.031294	hypo	0
chrX	147042208	148553819	6511	-0.228515	0.563379	0.791893	0.0467225	hypo	0
chr6	150396518	150917858	4583	-0.219308	0.612474	0.831782	0.0316427	hypo	0
chr1	185324007	186280672	4678	-0.217834	0.638369	0.856203	0.0318765	hypo	0
chr7	113731380	114516705	3732	-0.264981	0.569762	0.834743	0.0310603	hypo	0
chr3	192636024	193303926	4085	-0.249262	0.576806	0.826068	0.0321958	hypo	0
chr7	20839354	21462238	4068	-0.240649	0.608664	0.849313	0.0310357	hypo	0
chr2	101196365	101617769	4302	-0.219006	0.611051	0.830057	0.0299186	hypo	0
chr1	65900659	66757185	4090	-0.24386	0.579026	0.822887	0.0316988	hypo	0
chr13	111973993	112353880	5226	-0.180568	0.640041	0.820609	0.0300026	hypo	0
chr3	187468211	188140660	5106	-0.211013	0.629953	0.840967	0.0360849	hypo	0
chr8	943517	1341048	5277	-0.197132	0.666861	0.863994	0.033558	hypo	0
chr6	152627607	153286705	4231	-0.242482	0.580908	0.823391	0.0326858	hypo	0
chr16	48664794	49306737	3773	-0.265804	0.485544	0.751347	0.032028	hypo	0
chr9	82439915	83267212	4055	-0.248615	0.615295	0.86391	0.0319254	hypo	0
chrX	150602091	151847013	6082	-0.23767	0.516535	0.754205	0.0459569	hypo	0
chr10	15907510	16473984	3744	-0.2436	0.586544	0.830144	0.0292228	hypo	0
chr3	106283996	107142481	4605	-0.213865	0.620555	0.834421	0.0316334	hypo	0
chr7	153851926	154270498	3761	-0.252511	0.551271	0.803783	0.0306332	hypo	0
chr7	103094739	103765937	3777	-0.251262	0.541743	0.793005	0.0312654	hypo	0
chr5	109204023	110065253	3836	-0.259151	0.577505	0.836656	0.0320664	hypo	0
chr2	109503695	109943980	4852	-0.19132	0.634598	0.825919	0.0303323	hypo	0
chr8	52833608	53475435	4718	-0.215851	0.623789	0.83964	0.0329486	hypo	0
chr2	67640940	68274383	3457	-0.269288	0.55622	0.825508	0.0300371	hypo	0
chr1	175196538	175868778	4377	-0.223901	0.609927	0.833828	0.0318938	hypo	0
chrX	112093512	113517474	6193	-0.227913	0.588105	0.816018	0.0455223	hypo	0
chr6	96051921	96950294	3874	-0.254416	0.536174	0.79059	0.0319476	hypo	0
chrX	115732556	117474898	6369	-0.229055	0.521272	0.750327	0.0478144	hypo	0
chr16	77248997	77752865	3936	-0.246151	0.55962	0.805771	0.0315223	hypo	0
chr16	19898786	20447723	4488	-0.222499	0.547625	0.770123	0.0328594	hypo	0
chr18	52209328	52928042	4313	-0.225295	0.610388	0.835683	0.0328256	hypo	0
chr5	67593894	68381390	4696	-0.200294	0.655229	0.855523	0.0304481	hypo	0
chr4	148657412	149359364	4930	-0.18364	0.680931	0.864571	0.0293906	hypo	0
chr7	15730346	16455332	3877	-0.263047	0.578724	0.841772	0.0338866	hypo	0
chr13	38944333	39584403	3790	-0.245532	0.565071	0.810603	0.0304098	hypo	0
chr1	224809871	225571353	4118	-0.240945	0.590504	0.831449	0.0322653	hypo	0
chr18	29719659	30345177	4004	-0.238049	0.595467	0.833516	0.031945	hypo	0
chr7	41742795	42272203	4297	-0.214761	0.615657	0.830418	0.0301144	hypo	0
chr17	63561722	64188251	4316	-0.232203	0.623506	0.855709	0.0330229	hypo	0
chr4	74148105	75027836	4249	-0.215895	0.58611	0.802005	0.0302522	hypo	0
chr9	78507787	79000396	3610	-0.261593	0.574949	0.836541	0.0310239	hypo	0
chr20	22565168	23029313	3246	-0.273879	0.497809	0.771688	0.0291345	hypo	0
chr17	67576771	68161779	3625	-0.271127	0.571142	0.84227	0.0323524	hypo	0
chr10	100212422	100987513	3623	-0.250809	0.556836	0.807645	0.0298724	hypo	0
chr2	182790913	183574249	3804	-0.250687	0.593504	0.844191	0.0314117	hypo	0
chr1	217809816	218456003	3836	-0.250461	0.54278	0.793241	0.0315111	hypo	0
chr8	56021549	56644951	3963	-0.243973	0.564146	0.808119	0.0317875	hypo	0
chr1	199080135	199997499	4836	-0.20519	0.661094	0.866284	0.0329138	hypo	0
chr8	17168987	17656192	4891	-0.202387	0.605849	0.808236	0.0327106	hypo	0
chr3	25835784	26659583	3682	-0.267324	0.545508	0.812831	0.0325103	hypo	0
chr3	180715794	181412888	3473	-0.281582	0.547026	0.828608	0.0324354	hypo	0
chr2	102336765	103009015	5211	-0.172888	0.6487	0.821588	0.0299882	hypo	0
chr4	82415777	83262561	4359	-0.218178	0.612604	0.830783	0.0317166	hypo	0
chr6	45394736	46072873	4609	-0.20671	0.628616	0.835326	0.0316776	hypo	0
chr4	12654025	13355576	3788	-0.231162	0.604535	0.835697	0.0289551	hypo	0
chr2	88355715	88855672	4483	-0.200574	0.624967	0.825541	0.0303381	hypo	0
chr3	40580037	41234252	3722	-0.25153	0.60226	0.85379	0.0309812	hypo	0
chr1	61550242	62137370	4343	-0.21909	0.626321	0.84541	0.0316652	hypo	0
chr5	53816335	54466394	4007	-0.243019	0.575034	0.818054	0.0330225	hypo	0
chr13	31742098	32416777	4175	-0.240257	0.592771	0.833028	0.0351946	hypo	0
chr5	35236135	36096072	4551	-0.213172	0.58985	0.803022	0.032869	hypo	0
chr13	78342658	79163084	4119	-0.229424	0.572318	0.801743	0.0317428	hypo	0
chr1	53804007	54205718	4378	-0.214706	0.615854	0.83056	0.0313401	hypo	0
chr8	55380808	56009335	3702	-0.258019	0.549605	0.807624	0.0319749	hypo	0
chr12	83093112	83977743	4535	-0.198905	0.645323	0.844228	0.0298759	hypo	0
chr4	75491200	76396118	4003	-0.218582	0.603721	0.822303	0.0291222	hypo	0
chr14	53651130	54417561	4044	-0.224159	0.593614	0.817772	0.030361	hypo	0
chr11	45206327	45683216	4133	-0.22971	0.533022	0.762732	0.0322728	hypo	0
chr3	186855292	187454937	3955	-0.235511	0.57935	0.814861	0.0311717	hypo	0
chr12	21806988	22482333	3950	-0.231155	0.569047	0.800202	0.030575	hypo	0
chrX	42903327	44198351	6292	-0.218665	0.586892	0.805557	0.0463786	hypo	0
chr18	43850422	44336496	4249	-0.211078	0.589963	0.801041	0.0304114	hypo	0
chr3	131235275	132129745	4241	-0.219039	0.580133	0.799172	0.0313241	hypo	0
chr1	170639140	171452158	4252	-0.220699	0.601825	0.822523	0.0318324	hypo	0
chr1	242528635	243119779	4072	-0.226952	0.572227	0.799179	0.0312792	hypo	0
chr2	173495595	174213055	4937	-0.178559	0.671416	0.849976	0.0297471	hypo	0
chr3	146265715	147071564	3488	-0.279074	0.522216	0.801291	0.0331904	hypo	0
chr17	70122475	70647619	5440	-0.179687	0.597995	0.777682	0.0333195	hypo	0
chr8	132053336	132909777	3877	-0.262899	0.514438	0.777337	0.0352	hypo	0
chr20	23412620	23961205	3227	-0.264788	0.533866	0.798654	0.0293469	hypo	0
chr12	100975253	101674763	3951	-0.226763	0.567491	0.794254	0.0311347	hypo	0
chr18	57026984	57547737	4306	-0.207754	0.592587	0.800341	0.0307785	hypo	0
chr6	145164891	146008990	4099	-0.224628	0.622543	0.847171	0.031518	hypo	0
chr2	157447318	158177488	3477	-0.250526	0.560988	0.811515	0.0300003	hypo	0
chr14	90872369	91221605	3887	-0.222084	0.627772	0.849856	0.0296943	hypo	0
chr13	80119766	80910440	4014	-0.215081	0.636853	0.851933	0.0298471	hypo	0
chr5	128456187	129229988	3339	-0.277857	0.53783	0.815688	0.0326286	hypo	0
chr14	101539213	101921195	4065	-0.21642	0.581417	0.797836	0.030781	hypo	0
chr17	38817306	39421309	4185	-0.218296	0.61102	0.829317	0.0320948	hypo	0
chr14	72407681	72914479	3468	-0.247701	0.571328	0.819029	0.0298542	hypo	0
chr9	112088147	112669015	4379	-0.206537	0.560338	0.766875	0.0317843	hypo	0
chr3	123686438	124301778	3434	-0.26026	0.541085	0.801345	0.0312484	hypo	0
chr1	222999033	223535234	3970	-0.223915	0.619291	0.843206	0.0310351	hypo	0
chr4	154717529	155410356	3748	-0.227443	0.558325	0.785767	0.0299365	hypo	0
chr3	50667875	51416355	3832	-0.232818	0.613096	0.845915	0.031213	hypo	0
chr11	44751833	45161405	3940	-0.224193	0.569627	0.793819	0.0309558	hypo	0
chr5	89823442	90569382	4098	-0.216785	0.620602	0.837387	0.0315483	hypo	0
chr3	190236749	190969872	4307	-0.208125	0.631342	0.839466	0.0315443	hypo	0
chr6	100068487	100894990	3877	-0.236116	0.551081	0.787197	0.0323459	hypo	0
chr7	140776626	141253910	3623	-0.240043	0.571806	0.811848	0.0306638	hypo	0
chr9	101020539	101468086	3815	-0.227908	0.601486	0.829394	0.0306573	hypo	0
chr11	120387117	120895487	5263	-0.169087	0.639604	0.808691	0.0315335	hypo	0
chrX	145905098	146992087	5191	-0.251882	0.523111	0.774993	0.0460861	hypo	0
chr2	291790	668936	4445	-0.195803	0.627257	0.82306	0.0309987	hypo	0
chr6	159593010	160086437	3814	-0.234573	0.581477	0.81605	0.0317389	hypo	0
chr2	19562525	20094745	3498	-0.238707	0.546278	0.784984	0.029363	hypo	0
chr12	66743838	67457089	3814	-0.220425	0.639269	0.859695	0.0298639	hypo	0
chr7	141487942	142047882	3481	-0.248937	0.566091	0.815028	0.0306257	hypo	0
chr7	28450946	28989859	4220	-0.20187	0.62592	0.82779	0.0303282	hypo	0
chr5	171694854	172067042	4229	-0.205055	0.625557	0.830611	0.0310021	hypo	0
chr5	113701511	114501404	3659	-0.255531	0.548512	0.804042	0.0340296	hypo	0
chr2	239361488	239753060	3977	-0.206718	0.61813	0.824848	0.029325	hypo	0
chr5	170847387	171267211	4239	-0.208891	0.624325	0.833216	0.031869	hypo	0
chr11	19739775	20175909	3439	-0.260798	0.557436	0.818234	0.0324169	hypo	0
chr19	57134100	57614630	5369	-0.200158	0.580872	0.78103	0.0382696	hypo	0
chr5	7399136	7849326	3505	-0.249404	0.559867	0.80927	0.0313003	hypo	0
chr7	103863899	104574331	3962	-0.220839	0.573879	0.794718	0.0317998	hypo	0
chrX	109577141	110918306	5664	-0.231333	0.516001	0.747334	0.0469173	hypo	0
chr4	57897077	58425651	3248	-0.253123	0.533111	0.786234	0.0294118	hypo	0
chr3	126712571	127174444	4297	-0.206406	0.583507	0.789913	0.0319252	hypo	0
chr11	35843761	36299415	3876	-0.225087	0.595384	0.820471	0.0315699	hypo	0
chr5	112935105	113693993	3475	-0.255653	0.520869	0.776522	0.0324865	hypo	0
chr12	39202714	39998704	4177	-0.202187	0.613833	0.81602	0.0310038	hypo	0
chr9	14674132	15294984	3885	-0.2191	0.619978	0.839079	0.0309298	hypo	0
chr21	33246374	33636842	3673	-0.224137	0.59647	0.820607	0.0298585	hypo	0
chr12	80338035	81103868	3522	-0.240698	0.564795	0.805492	0.0309116	hypo	0
chr12	25542911	26106422	3384	-0.247439	0.591207	0.838647	0.030623	hypo	0
chr7	154370704	154725990	4106	-0.205273	0.591979	0.797252	0.0308272	hypo	0
chrX	104141571	105509615	5094	-0.247222	0.48257	0.729792	0.0456536	hypo	0
chr3	26662406	27404677	3417	-0.265798	0.540413	0.806211	0.0332618	hypo	0
chr17	58770860	59471150	5464	-0.159221	0.751159	0.91038	0.0317851	hypo	0
chr11	10909482	11632236	5207	-0.201815	0.616483	0.818297	0.042495	hypo	0
chr18	33878477	34359701	3535	-0.237443	0.607603	0.845046	0.0308262	hypo	0
chr6	62179113	62991555	3343	-0.282183	0.594089	0.876272	0.035127	hypo	0
chr11	129247192	129726385	3789	-0.228091	0.569149	0.79724	0.0318004	hypo	0
chr1	184048691	184660236	4031	-0.213164	0.628181	0.841345	0.0315844	hypo	0
chr5	177677906	178005192	4605	-0.182652	0.646788	0.82944	0.0308816	hypo	0
chr18	44790918	45340028	3672	-0.227163	0.541783	0.768946	0.0310047	hypo	0
chr3	132445423	133144004	3533	-0.241425	0.58193	0.823355	0.0316497	hypo	0
chr9	92997258	93509880	3414	-0.240257	0.605061	0.845319	0.0301196	hypo	0
chr7	43154686	43635074	3851	-0.215312	0.606776	0.822088	0.0307031	hypo	0
chr12	63328849	63951824	3040	-0.272045	0.526807	0.798852	0.0309696	hypo	0
chrX	50024277	51410800	5582	-0.229373	0.522235	0.751609	0.0471902	hypo	0
chr5	60928418	61519935	3360	-0.246139	0.590012	0.836151	0.0304818	hypo	0
chr6	133570934	134176428	3326	-0.260923	0.53895	0.799873	0.0323701	hypo	0
chr13	39626250	40226031	3655	-0.220575	0.612314	0.832888	0.0299015	hypo	0
chr3	38580430	39088032	3453	-0.244841	0.573243	0.818084	0.0312964	hypo	0
chr6	28955957	29593913	3627	-0.232069	0.563891	0.795961	0.0313576	hypo	0
chr19	13326891	13837155	5485	-0.188893	0.602264	0.791157	0.0385836	hypo	0
chr3	87307518	88075357	3552	-0.236315	0.580202	0.816516	0.0312364	hypo	0
chr4	3572794	3883076	4683	-0.170615	0.55238	0.722996	0.0302909	hypo	0
chr2	174251909	174766711	3914	-0.198908	0.649211	0.848119	0.0289754	hypo	0
chr17	63098841	63554210	4420	-0.192418	0.605124	0.797542	0.0318152	hypo	0
chr4	78870800	79568698	3861	-0.206739	0.604944	0.811683	0.030019	hypo	0
chr5	158716148	159394150	4447	-0.186044	0.65799	0.844034	0.0311027	hypo	0
chr1	90502945	91169487	3307	-0.256945	0.575639	0.832584	0.0318291	hypo	0
chr5	81607225	82333116	3961	-0.211237	0.636765	0.848002	0.0316148	hypo	0
chr8	25374499	25894120	3660	-0.231147	0.554772	0.785919	0.0317069	hypo	0
chr7	111214579	111840751	3987	-0.203947	0.65551	0.859457	0.0305925	hypo	0
chr12	107720780	108076354	3132	-0.253673	0.595481	0.849153	0.0298314	hypo	0
chr7	27874301	28444836	4207	-0.19411	0.667538	0.861648	0.0313853	hypo	0
chr4	107268491	107954247	2780	-0.276877	0.541073	0.81795	0.0290543	hypo	0
chr8	53859103	54563462	3559	-0.243065	0.564874	0.807939	0.0336595	hypo	0
chr10	53462326	54066458	2893	-0.265171	0.55722	0.822391	0.0292641	hypo	0
chr2	180137570	180802492	3289	-0.236387	0.589394	0.82578	0.0294498	hypo	0
chr10	48300663	48664287	3070	-0.250882	0.565973	0.816854	0.029525	hypo	0
chr2	72378979	73048513	3229	-0.245373	0.641202	0.886575	0.0299943	hypo	0
chr8	10196002	10580258	4452	-0.189142	0.634902	0.824043	0.0319394	hypo	0
chr6	2295441	2759913	4466	-0.186223	0.663856	0.85008	0.0317344	hypo	0
chr5	6773636	7287873	3414	-0.252238	0.539498	0.791736	0.0333445	hypo	0
chr17	10105534	10556601	4189	-0.201382	0.631527	0.832908	0.0320362	hypo	0
chr14	66217112	66950800	4121	-0.205041	0.648067	0.853108	0.0331225	hypo	0
chr5	85602885	86351956	3162	-0.263056	0.552611	0.815666	0.0314321	hypo	0
chr2	161262909	161929141	3344	-0.234916	0.595239	0.830155	0.0299418	hypo	0
chr22	48511046	48883304	4742	-0.173794	0.640503	0.814297	0.0314876	hypo	0
chr14	30396580	31026921	3212	-0.249091	0.554985	0.804075	0.0308519	hypo	0
chr7	138277308	138662221	4315	-0.182342	0.684785	0.867127	0.0299785	hypo	0
chr5	148208041	148722741	3456	-0.240108	0.567108	0.807217	0.0323549	hypo	0
chr4	165200798	165876604	3652	-0.222002	0.584601	0.806603	0.0316132	hypo	0
chr11	12251682	12691678	3297	-0.246072	0.568135	0.814206	0.0311881	hypo	0
chr13	44463098	45010510	3855	-0.205585	0.607919	0.813504	0.0307733	hypo	0
chr13	102571575	103044565	2796	-0.277488	0.526103	0.803591	0.0299582	hypo	0
chr18	61085853	61633401	3631	-0.217208	0.589254	0.806463	0.0307735	hypo	0
chr8	9767304	10187014	4050	-0.203984	0.649397	0.85338	0.0321287	hypo	0
chr9	79082675	79624766	4275	-0.187365	0.630029	0.817394	0.0312061	hypo	0
chr16	54974739	55356083	3179	-0.254384	0.531697	0.78608	0.031325	hypo	0
chr3	194414495	194788511	4193	-0.194496	0.655554	0.850049	0.0316101	hypo	0
chr2	26631499	26988409	3871	-0.195237	0.605102	0.800339	0.029338	hypo	0
chr4	40759892	41213037	4307	-0.176397	0.681992	0.858389	0.0294141	hypo	0
chr8	117889961	118527858	3256	-0.25079	0.547061	0.797851	0.0318019	hypo	0
chr8	127569711	128244559	4131	-0.206161	0.646228	0.852389	0.0327704	hypo	0
chr1	221067374	221834152	4095	-0.19564	0.660666	0.856305	0.0309083	hypo	0
chr2	234771223	235213189	3676	-0.208867	0.592442	0.801309	0.0303474	hypo	0
chr2	33173149	33667625	3879	-0.197129	0.672416	0.869545	0.0296282	hypo	0
chr21	16440319	17100007	3851	-0.201242	0.635584	0.836826	0.0303457	hypo	0
chr10	119314744	119753094	3538	-0.209677	0.572445	0.782122	0.0289231	hypo	0
chr4	152043690	152597837	3672	-0.206243	0.636662	0.842905	0.0297498	hypo	0
chr8	142441955	142745592	3970	-0.205881	0.535673	0.741554	0.0318903	hypo	0
chrX	96866359	97942203	4425	-0.263292	0.566871	0.830164	0.0453386	hypo	0
chr4	155667648	156275835	2898	-0.256922	0.540692	0.797614	0.0289825	hypo	0
chr9	106911168	107507456	3029	-0.261849	0.571224	0.833074	0.0311658	hypo	0
chr2	119617641	120086805	3793	-0.205611	0.58061	0.786222	0.0309219	hypo	0
chr6	134642356	135192075	4023	-0.196765	0.673751	0.870516	0.0310085	hypo	0
chr2	48761422	49449886	3803	-0.234701	0.589441	0.824142	0.0375829	hypo	0
chr1	17381830	17738668	4089	-0.194203	0.607488	0.801692	0.0312607	hypo	0
chr14	76848441	77223899	3654	-0.207413	0.609199	0.816612	0.0299799	hypo	0
chr13	22252620	22644698	3745	-0.200748	0.634591	0.835338	0.0301488	hypo	0
chr11	86061529	86667175	3598	-0.22155	0.597574	0.819124	0.031911	hypo	0
chr16	47745165	48270948	3873	-0.202194	0.619498	0.821692	0.0309951	hypo	0
chr15	29209978	29556290	3851	-0.19466	0.642505	0.837166	0.029747	hypo	0
chr18	47929195	48340709	3062	-0.244276	0.55533	0.799606	0.0297557	hypo	0
chr12	20928184	21587445	2725	-0.272055	0.533677	0.805732	0.0295866	hypo	0
chr1	203301017	203731928	3911	-0.198289	0.626755	0.825043	0.0312982	hypo	0
chr8	133027841	133486043	3357	-0.232881	0.563501	0.796382	0.0312112	hypo	0
chr9	38076946	38539584	3659	-0.207486	0.594819	0.802305	0.0305215	hypo	0
chr3	168874377	169375110	2911	-0.270695	0.537776	0.808471	0.0317433	hypo	0
chr15	89202524	89630067	4023	-0.183844	0.622699	0.806542	0.0297449	hypo	0
chr11	57591570	58274412	3433	-0.230628	0.577487	0.808115	0.0322415	hypo	0
chr4	6272697	6583379	3987	-0.182462	0.548774	0.731236	0.0293415	hypo	0
chr16	52584641	53083843	3019	-0.258034	0.535438	0.793472	0.031395	hypo	0
chr15	32018306	32445252	3110	-0.23783	0.553471	0.7913	0.0299188	hypo	0
chr5	141741518	142143732	3830	-0.197174	0.633307	0.830481	0.0304531	hypo	0
chr2	105978963	106354592	3568	-0.209672	0.618105	0.827777	0.0310331	hypo	0
chr5	121417469	122039873	3276	-0.239531	0.598012	0.837543	0.031868	hypo	0
chr2	14780952	15327700	3412	-0.22064	0.612153	0.832792	0.0304214	hypo	0
chr5	86713621	87432598	2859	-0.275779	0.519334	0.795113	0.0320851	hypo	0
chr2	162283655	162925351	3072	-0.248122	0.554834	0.802955	0.0312709	hypo	0
chr2	158738293	159308862	2737	-0.271402	0.560413	0.831816	0.0301872	hypo	0
chr3	136729643	137469716	3423	-0.236421	0.550368	0.786789	0.0329829	hypo	0
chr2	108519679	109056608	2796	-0.260892	0.565138	0.826031	0.0296044	hypo	0
chr10	57396435	58105712	2889	-0.265343	0.5224	0.787743	0.0314846	hypo	0
chr4	41364964	41747095	2759	-0.25875	0.558267	0.817017	0.0289898	hypo	0
chr6	135825467	136549525	4013	-0.190756	0.688833	0.879589	0.0312661	hypo	0
chr3	17838268	18464559	3394	-0.224485	0.611777	0.836263	0.0309392	hypo	0
chr11	19269341	19726481	3153	-0.247971	0.543164	0.791135	0.0323137	hypo	0
chr20	4207112	4661291	2961	-0.241514	0.548455	0.789969	0.0296657	hypo	0
chr2	237090083	237442879	3338	-0.218187	0.603705	0.821892	0.0301033	hypo	0
chr10	94838335	95247618	3692	-0.188591	0.64409	0.832681	0.0285449	hypo	0
chr18	47351345	47791962	3335	-0.221784	0.574032	0.795817	0.030544	hypo	0
chr7	96814831	97487610	3554	-0.221397	0.588474	0.809871	0.0327648	hypo	0
chr3	37496670	37899666	3032	-0.256519	0.563395	0.819913	0.0324593	hypo	0
chr11	87039020	87687005	2822	-0.285718	0.542407	0.828125	0.0335516	hypo	0
chrX	82770178	84253215	5278	-0.213895	0.525501	0.739396	0.0467146	hypo	0
chr12	5156409	5537969	2820	-0.264714	0.54836	0.813074	0.0312852	hypo	0
chr11	69140050	69450783	3793	-0.197731	0.63364	0.831371	0.0310068	hypo	0
chr18	34506789	35060417	3949	-0.194453	0.620828	0.815281	0.0320694	hypo	0
chr7	19185668	19744443	2700	-0.277155	0.541784	0.818939	0.0310033	hypo	0
chr10	131409994	131754611	4851	-0.143355	0.744741	0.888097	0.0288611	hypo	0
chr10	4869954	5455561	3195	-0.231537	0.564661	0.796198	0.031432	hypo	0
chr13	112765229	113132077	4193	-0.172598	0.617764	0.790363	0.0298396	hypo	0
chr12	55387431	56099972	3360	-0.214798	0.598453	0.813251	0.029953	hypo	0
chr18	11149972	11615006	3407	-0.212665	0.612315	0.82498	0.0300884	hypo	0
chr8	92156826	92801376	2761	-0.281428	0.540617	0.822045	0.0322582	hypo	0
chr4	54330746	54861095	3219	-0.216143	0.615916	0.832058	0.0288394	hypo	0
chr2	15780991	16077883	3084	-0.231629	0.609858	0.841488	0.0297118	hypo	0
chr12	114405016	114831546	2803	-0.25295	0.483907	0.736857	0.0294702	hypo	0
chr1	168245447	169067798	4515	-0.186776	0.655475	0.842251	0.0358341	hypo	0
chr1	83647527	84546474	3656	-0.213017	0.623475	0.836492	0.0324262	hypo	0
chr12	15137669	15700393	3135	-0.228814	0.572682	0.801497	0.0300563	hypo	0
chrX	113819564	114789171	4706	-0.237166	0.531085	0.768251	0.0467648	hypo	0
chr16	50830354	51180006	3128	-0.239793	0.522973	0.762766	0.0316664	hypo	0
chr7	61967209	62678828	3525	-0.213481	0.451042	0.664523	0.0319093	hypo	0
chr9	124467253	124853552	3865	-0.188854	0.684277	0.873131	0.0306581	hypo	0
chr2	31460339	32060336	3188	-0.223746	0.594164	0.817909	0.0303594	hypo	0
chr17	39432305	39819919	3439	-0.221069	0.560337	0.781406	0.0320976	hypo	0
chr15	49930818	50570494	3226	-0.225399	0.612682	0.838081	0.030702	hypo	0
chr6	86718451	87515596	2553	-0.301442	0.484304	0.785746	0.0324775	hypo	0
chr6	118039224	118781544	3427	-0.223933	0.575087	0.79902	0.0325955	hypo	0
chr6	14734061	15232361	5172	-0.142086	0.74022	0.882305	0.0309586	hypo	0
chr13	50706970	51413300	4086	-0.171522	0.680834	0.852356	0.0297351	hypo	0
chr6	166081820	166416491	3708	-0.205706	0.545614	0.75132	0.0327346	hypo	0
chr8	1356252	1647262	3906	-0.193452	0.668483	0.861935	0.0319557	hypo	0
chr15	73349861	73840217	3397	-0.210929	0.599969	0.810898	0.0306476	hypo	0
chr15	99198342	99549975	4000	-0.174309	0.659236	0.833545	0.0295377	hypo	0
chr7	142502191	142956294	3016	-0.236776	0.600055	0.836832	0.0306115	hypo	0
chr5	34408585	34899622	3506	-0.208302	0.614823	0.823125	0.0314144	hypo	0
chr2	170947932	171565581	4019	-0.17424	0.662211	0.836451	0.0298772	hypo	0
chr2	241072860	241384185	3842	-0.185816	0.607296	0.793112	0.0309421	hypo	0
chr22	45108680	45399900	4238	-0.168561	0.648249	0.81681	0.0304124	hypo	0
chr3	152192301	152874059	3810	-0.195723	0.644457	0.840179	0.0318855	hypo	0
chr3	66556382	67044733	3465	-0.214068	0.633487	0.847555	0.0318294	hypo	0
chr2	191891154	192484754	4028	-0.18604	0.657061	0.843101	0.0326103	hypo	0
chr1	37507288	37923788	3268	-0.222243	0.527031	0.749274	0.0311881	hypo	0
chr9	109626400	110037401	2763	-0.263001	0.586868	0.849869	0.0315124	hypo	0
chr16	77766630	78128869	3281	-0.232362	0.573132	0.805494	0.0331718	hypo	0
chr21	47060986	47391590	3809	-0.187298	0.667263	0.854561	0.0305433	hypo	0
chr12	1104974	1630078	4743	-0.144267	0.769726	0.913993	0.0292659	hypo	0
chr5	178486470	178770960	3750	-0.191611	0.643123	0.834734	0.0307479	hypo	0
chr11	61241984	61560970	4187	-0.178809	0.563549	0.742357	0.0328682	hypo	0
chr8	60035730	60869564	3931	-0.185231	0.692095	0.877326	0.0312348	hypo	0
chr9	77123530	77558282	3131	-0.224613	0.615439	0.840052	0.0304662	hypo	0
chr3	155683975	156231265	3289	-0.219096	0.625223	0.844319	0.0309239	hypo	0
chr7	45155152	45613143	3224	-0.224497	0.568589	0.793087	0.0313489	hypo	0
chr1	70912867	71509330	2795	-0.270174	0.557128	0.827303	0.0327225	hypo	0
chr8	32691500	33247638	2953	-0.247626	0.58182	0.829446	0.0317495	hypo	0
chr7	47617978	47997701	4056	-0.17842	0.67356	0.851979	0.0314088	hypo	0
chr11	2425819	2800921	4306	-0.166997	0.663996	0.830993	0.0312902	hypo	0
chr22	36925919	37252478	3928	-0.182304	0.579702	0.762006	0.0312039	hypo	0
chr8	109512213	110192239	3150	-0.236193	0.596405	0.832597	0.0326563	hypo	0
chr4	183374783	183729934	3183	-0.213878	0.63316	0.847038	0.0296627	hypo	0
chr11	128762103	129237584	3431	-0.232979	0.595416	0.828395	0.0348574	hypo	0
chr4	55100710	55521379	2633	-0.260762	0.560703	0.821465	0.029914	hypo	0
chr4	88387194	88923823	3023	-0.228436	0.599695	0.828131	0.0304159	hypo	0
chr12	112951198	113343431	2935	-0.234983	0.567937	0.80292	0.0299431	hypo	0
chr8	124827217	125375894	3717	-0.192793	0.653484	0.846278	0.0311377	hypo	0
chrX	131656372	132541856	4862	-0.220063	0.554335	0.774397	0.0471243	hypo	0
chr16	55691767	56219456	2761	-0.264619	0.529822	0.794441	0.0324041	hypo	0
chr14	95242719	95551329	3162	-0.221321	0.588441	0.809762	0.0305476	hypo	0
chr8	57363089	57869144	2893	-0.252972	0.565005	0.817977	0.0319454	hypo	0
chr15	57608310	57992640	3501	-0.195797	0.647855	0.843652	0.0299727	hypo	0
chr10	1178979	1496058	3830	-0.175549	0.64153	0.817079	0.0295833	hypo	0
chr6	85488360	86160151	3006	-0.254912	0.525672	0.780584	0.0340223	hypo	0
chr2	224832345	225266178	3144	-0.214321	0.609811	0.824132	0.0294704	hypo	0
chr12	65642632	66130880	2731	-0.250872	0.568484	0.819356	0.0303659	hypo	0
chr1	63330567	63781139	3320	-0.212336	0.623319	0.835656	0.0307683	hypo	0
chr2	8971592	9342046	3440	-0.197753	0.637082	0.834835	0.0301091	hypo	0
chr4	102339026	103179053	3954	-0.167396	0.708208	0.875603	0.0290518	hypo	0
chr11	125040089	125358851	3441	-0.207672	0.574726	0.782398	0.0313949	hypo	0
chr21	40201551	40549239	3375	-0.20176	0.59916	0.80092	0.0301554	hypo	0
chr16	84227010	84511645	3968	-0.17696	0.633757	0.810717	0.0309475	hypo	0
chr11	119256247	119597532	3455	-0.20651	0.57614	0.78265	0.0319193	hypo	0
chr5	174965225	175293732	3439	-0.201129	0.577925	0.779054	0.030651	hypo	0
chr9	72381261	72871680	2720	-0.258498	0.548893	0.80739	0.0315728	hypo	0
chr9	7183234	7788534	3323	-0.208519	0.628164	0.836684	0.0306435	hypo	0
chr20	20720617	21076144	3150	-0.202951	0.599573	0.802523	0.028344	hypo	0
chr8	86841010	87350206	2830	-0.265375	0.55275	0.818125	0.0335809	hypo	0
chr7	36007457	36402702	3437	-0.204195	0.62724	0.831436	0.0316105	hypo	0
chr15	77835099	78108562	3130	-0.216713	0.559942	0.776655	0.0306952	hypo	0
chr15	66187973	66540569	3456	-0.193689	0.608699	0.802388	0.0298584	hypo	0
chr16	27773698	28099473	3682	-0.190208	0.615147	0.805354	0.0311701	hypo	0
chr7	35302241	35671098	2645	-0.254797	0.561245	0.816043	0.0300503	hypo	0
chr5	52104283	52769309	3308	-0.218034	0.605971	0.824005	0.032635	hypo	0
chr1	22426869	22779268	3997	-0.175787	0.600403	0.77619	0.0314813	hypo	0
chr1	2686290	2984255	3976	-0.178347	0.62581	0.804158	0.0320545	hypo	0
chr4	20258952	20697846	2565	-0.257504	0.559078	0.816582	0.0297138	hypo	0
chr13	79238379	79883906	3352	-0.200928	0.628643	0.829571	0.0303932	hypo	0
chr12	28694746	29298505	2912	-0.231166	0.589916	0.821082	0.0307222	hypo	0
chr11	112836577	113180810	2696	-0.257382	0.552125	0.809507	0.0313404	hypo	0
chr1	227187866	227741251	3297	-0.214733	0.617275	0.832008	0.0320708	hypo	0
chr3	150997595	151586859	3145	-0.24572	0.60051	0.84623	0.0364723	hypo	0
chr17	32909869	33284308	2841	-0.244657	0.493415	0.738072	0.0313337	hypo	0
chr13	98116385	98622645	3156	-0.205577	0.62658	0.832157	0.0291736	hypo	0
chr4	164592975	165180689	2726	-0.240212	0.576243	0.816455	0.0293973	hypo	0
chr7	23730103	24324592	3098	-0.2176	0.593676	0.811276	0.0303941	hypo	0
chr5	37843959	38258631	2796	-0.251257	0.556206	0.807462	0.0317514	hypo	0
chr19	33884986	34306045	5211	-0.16474	0.625497	0.790237	0.0388046	hypo	0
chr9	35118014	35601693	3224	-0.209164	0.632156	0.84132	0.030755	hypo	0
chr6	33827611	34109443	3245	-0.212537	0.58508	0.797617	0.0312372	hypo	0
chr5	57767208	58329440	2993	-0.235222	0.584594	0.819816	0.0327187	hypo	0
chr2	107131467	107496238	2717	-0.250954	0.556663	0.807617	0.0319727	hypo	0
chr1	162001155	162465374	3230	-0.217509	0.597937	0.815446	0.0323248	hypo	0
chr12	34376092	34856628	4179	-0.177495	0.515922	0.693417	0.0343119	hypo	0
chr13	98798728	99096409	3563	-0.187629	0.68365	0.871278	0.0305513	hypo	0
chrX	123407548	124336679	4437	-0.228479	0.545656	0.774135	0.0465352	hypo	0
chr7	18595385	19145530	3049	-0.222944	0.670655	0.893599	0.0309163	hypo	0
chr4	152666351	153241235	4148	-0.153658	0.671892	0.82555	0.0292659	hypo	0
chr13	23502021	23896624	3118	-0.211494	0.625643	0.837137	0.0304617	hypo	0
chr6	3462940	3742755	2848	-0.238478	0.605596	0.844074	0.0311874	hypo	0
chr11	6763613	7518873	3925	-0.180759	0.620229	0.800988	0.0334411	hypo	0
chr14	34422891	34899491	3179	-0.205881	0.609071	0.814952	0.0303144	hypo	0
chr3	184099881	184425321	3819	-0.182266	0.587621	0.769887	0.0326668	hypo	0
chr6	57211137	58024500	3529	-0.196431	0.551405	0.747836	0.0317305	hypo	0
chr1	38515845	38989593	3810	-0.181859	0.606733	0.788592	0.0325341	hypo	0
chr10	3220262	3503803	3530	-0.174548	0.669657	0.844205	0.0286075	hypo	0
chr20	23035033	23326498	2586	-0.239196	0.577147	0.816343	0.028778	hypo	0
chr9	71874792	72326698	3003	-0.21663	0.587748	0.804378	0.0303056	hypo	0
chr1	201125111	201435205	3071	-0.220642	0.546425	0.767067	0.0318548	hypo	0
chrX	11930970	12808318	4672	-0.208966	0.559659	0.768625	0.045793	hypo	0
chr11	17411043	17737620	2994	-0.225772	0.551895	0.777667	0.031887	hypo	0
chr10	1505860	1776483	3783	-0.160093	0.64239	0.802483	0.028407	hypo	0
chr14	59111170	59647040	3317	-0.196447	0.656008	0.852455	0.0307288	hypo	0
chr5	94052063	94793074	4004	-0.170739	0.666042	0.836781	0.0326455	hypo	0
chr1	204046425	204347359	3094	-0.218954	0.555524	0.774477	0.0321306	hypo	0
chr11	69788554	70045982	3508	-0.190848	0.559432	0.75028	0.0316131	hypo	0
chr14	73006685	73356593	3329	-0.189165	0.674817	0.863982	0.0296096	hypo	0
chr16	16856655	17397383	4592	-0.144774	0.716417	0.861191	0.0317499	hypo	0
chr2	169745940	170216350	2818	-0.221462	0.614141	0.835603	0.0295783	hypo	0
chr11	110590204	111161116	3242	-0.207786	0.63885	0.846636	0.0320029	hypo	0
chr11	102435399	102927677	3057	-0.212712	0.608566	0.821277	0.0307456	hypo	0
chr6	160555255	161032593	3190	-0.209962	0.584681	0.794643	0.0318873	hypo	0
chr1	116385830	116913832	3289	-0.220263	0.617586	0.837849	0.0354434	hypo	0
chr14	59965810	60550117	2920	-0.220434	0.574535	0.79497	0.0307129	hypo	0
chr19	56219660	56587126	4159	-0.192848	0.622686	0.815534	0.038098	hypo	0
chr4	25426174	25747753	3215	-0.190097	0.677569	0.867667	0.0290668	hypo	0
chr6	105853433	106428853	3674	-0.181414	0.657158	0.838572	0.0321377	hypo	0
chr7	55088287	55428283	3369	-0.187369	0.624607	0.811976	0.0301661	hypo	0
chr4	121996549	122585006	2952	-0.213481	0.59209	0.805571	0.030878	hypo	0
chr3	30664060	31229651	3258	-0.203576	0.618478	0.822054	0.0324142	hypo	0
chr8	9016133	9404207	3505	-0.186375	0.660191	0.846566	0.0311774	hypo	0
chr22	36059615	36422279	2844	-0.224814	0.643314	0.868128	0.0304629	hypo	0
chr12	113919879	114250201	3237	-0.201596	0.530533	0.732129	0.0317393	hypo	0
chr9	138396303	138695507	3721	-0.16834	0.623742	0.792082	0.029896	hypo	0
chrX	78689434	79912180	4102	-0.23642	0.501929	0.73835	0.0468345	hypo	0
chr10	21465348	21779918	3035	-0.200224	0.663864	0.864088	0.0291524	hypo	0
chr4	169247878	169750294	3559	-0.175362	0.655734	0.831096	0.0302847	hypo	0
chr3	27773355	28278553	2520	-0.259505	0.58279	0.842295	0.0314589	hypo	0
chr4	140627068	141068392	3725	-0.161376	0.65419	0.815566	0.0289263	hypo	0
chr10	16864983	17239233	2869	-0.217746	0.640208	0.857953	0.0304789	hypo	0
chr13	110961691	111209268	3584	-0.170942	0.615607	0.786549	0.0294884	hypo	0
chr7	92990290	93624796	2935	-0.227027	0.584878	0.811905	0.032437	hypo	0
chr3	11893035	12325388	3098	-0.21178	0.619535	0.831315	0.0318107	hypo	0
chr4	184023257	184320686	2753	-0.219512	0.623178	0.84269	0.0291901	hypo	0
chr1	113668728	114226195	3225	-0.20963	0.636711	0.846341	0.032796	hypo	0
chr12	20525186	20915899	2266	-0.281544	0.547007	0.828551	0.0310287	hypo	0
chr14	100152050	100436721	3294	-0.1874	0.594383	0.781783	0.0300337	hypo	0
chr1	29573316	29877087	2647	-0.24302	0.523589	0.766609	0.031306	hypo	0
chr2	127456896	127782552	2659	-0.230317	0.554591	0.784907	0.0298076	hypo	0
chr2	216302651	216798392	3234	-0.198776	0.639581	0.838356	0.0315138	hypo	0
chr7	90895466	91484669	2516	-0.249746	0.575053	0.824799	0.0306733	hypo	0
chr5	111508157	112051201	3132	-0.204722	0.618911	0.823633	0.0313904	hypo	0
chr20	2127340	2436924	3081	-0.187939	0.640584	0.828523	0.0280799	hypo	0
chr7	158791614	159128488	3391	-0.186466	0.597816	0.784282	0.0308012	hypo	0
chr11	113936878	114266901	3078	-0.209112	0.579089	0.7882	0.0318598	hypo	0
chr11	64137224	64408614	3340	-0.192125	0.617052	0.809177	0.0314536	hypo	0
chr7	101010213	101288601	3328	-0.183976	0.634937	0.818913	0.0300244	hypo	0
chr1	23041795	23340833	3121	-0.204566	0.609406	0.813972	0.0312195	hypo	0
chr4	107960826	108545469	2407	-0.251987	0.576043	0.828031	0.029754	hypo	0
chr10	15415967	15756331	2829	-0.207975	0.591855	0.79983	0.0289563	hypo	0
chr5	16623333	16933407	3515	-0.181634	0.670856	0.852489	0.0312815	hypo	0
chr1	166221629	166803665	2525	-0.254943	0.558874	0.813817	0.0317841	hypo	0
chr4	113744817	114370637	3748	-0.163266	0.682712	0.845978	0.0301496	hypo	0
chr3	73123180	73522686	3277	-0.193154	0.639844	0.832998	0.0310636	hypo	0
chr8	19178067	19668942	4149	-0.16269	0.666569	0.829259	0.0337945	hypo	0
chr13	46105317	46526241	3156	-0.19455	0.646084	0.840634	0.0301756	hypo	0
chr9	140728549	141033403	3363	-0.183216	0.649703	0.832919	0.0306351	hypo	0
chr6	142542098	143063292	2853	-0.227396	0.603325	0.830721	0.0320711	hypo	0
chr2	111438850	111872054	3395	-0.175476	0.643367	0.818843	0.0294212	hypo	0
chr4	109097253	109538797	2725	-0.217688	0.619836	0.837523	0.029791	hypo	0
chr6	14219110	14717167	4201	-0.149648	0.694973	0.844621	0.0311675	hypo	0
chrX	29643211	30530791	4808	-0.194371	0.581296	0.775666	0.0464527	hypo	0
chr18	10656287	11146876	4049	-0.180527	0.649421	0.829948	0.0372661	hypo	0
chr8	81495917	81978555	3297	-0.204984	0.622767	0.827751	0.0350875	hypo	0
chr1	78515861	79114976	2656	-0.237517	0.556892	0.794409	0.0313599	hypo	0
chr11	12700357	13026750	2720	-0.23523	0.532903	0.768133	0.0322419	hypo	0
chr2	172974960	173364233	3035	-0.197058	0.587119	0.784176	0.0298427	hypo	0
chr6	82962854	83608673	2835	-0.237153	0.572813	0.809966	0.0343158	hypo	0
chrX	90182268	92075668	3483	-0.263841	0.536067	0.799908	0.0457506	hypo	0
chr19	54058038	54449670	5169	-0.148359	0.656921	0.805281	0.0382173	hypo	0
chr6	169616021	169979248	3401	-0.188131	0.663199	0.851329	0.0320665	hypo	0
chr5	149437576	149729432	3146	-0.199069	0.603859	0.802928	0.0315775	hypo	0
chr4	52916851	53457338	2448	-0.240592	0.566205	0.806797	0.0294265	hypo	0
chr4	15072692	15593201	2989	-0.200198	0.653872	0.85407	0.0302257	hypo	0
chr9	111272496	111625991	2404	-0.253163	0.58828	0.841443	0.0304042	hypo	0
chr20	50417671	50716047	3480	-0.16456	0.694609	0.859169	0.0287489	hypo	0
chr14	70253521	70651043	2948	-0.206075	0.606473	0.812548	0.0308228	hypo	0
chr8	118555288	119094328	3607	-0.177144	0.705048	0.882192	0.0319414	hypo	0
chr18	19440579	19743570	2780	-0.211694	0.639945	0.851639	0.029604	hypo	0
chr3	148893565	149369021	3331	-0.187022	0.66168	0.848702	0.0314047	hypo	0
chr10	99532008	99788720	2467	-0.228307	0.53482	0.763128	0.0285474	hypo	0
chr4	129238417	129725627	3209	-0.178596	0.687039	0.865635	0.0288837	hypo	0
chr2	28615209	28967489	3384	-0.175983	0.655117	0.8311	0.0304711	hypo	0
chr10	133431503	133677340	3013	-0.18928	0.590604	0.779884	0.0288273	hypo	0
chr6	90587911	90995664	3093	-0.207308	0.611899	0.819207	0.0329308	hypo	0
chr7	151332264	151569003	3376	-0.176408	0.672335	0.848744	0.0303632	hypo	0
chr8	140719564	141104203	5099	-0.120354	0.777394	0.897748	0.0310263	hypo	0
chr12	124514401	124807492	3740	-0.155239	0.673138	0.828377	0.0294315	hypo	0
chr15	79226856	79601804	3264	-0.191108	0.58548	0.776588	0.0328018	hypo	0
chr5	70954999	71500631	3472	-0.183912	0.624381	0.808293	0.0324948	hypo	0
chr14	54426793	54859664	2614	-0.227718	0.55994	0.787659	0.0304264	hypo	0
chr12	131366051	131700390	4153	-0.148742	0.664511	0.813253	0.0318465	hypo	0
chr3	104291265	105076751	3773	-0.201845	0.643543	0.845388	0.0391618	hypo	0
chr1	178066188	178511379	2829	-0.218609	0.620308	0.838918	0.0316595	hypo	0
chr20	39322191	39630493	2382	-0.237072	0.57318	0.810252	0.0287521	hypo	0
chr14	56594040	57038971	2874	-0.214801	0.613394	0.828194	0.0322669	hypo	0
chr14	93846456	94254499	3111	-0.189853	0.625351	0.815204	0.0302277	hypo	0
chr22	25057519	25343787	3115	-0.192266	0.640174	0.83244	0.0306963	hypo	0
chr5	134383650	134665523	2584	-0.230733	0.599818	0.83055	0.0307396	hypo	0
chr2	215682192	216172150	2985	-0.197554	0.653592	0.851147	0.0307327	hypo	0
chr5	112362982	112842643	3330	-0.196884	0.625171	0.822056	0.0341742	hypo	0
chr12	29546736	29927213	2380	-0.246503	0.579714	0.826217	0.0309128	hypo	0
chr8	55078296	55368041	2717	-0.222842	0.583094	0.805936	0.0312167	hypo	0
chr4	120467867	120978426	2390	-0.233872	0.582861	0.816733	0.0288013	hypo	0
chr1	75604331	76190666	2645	-0.238177	0.536091	0.774269	0.0330799	hypo	0
chr15	79732132	80130135	2542	-0.224925	0.613917	0.838842	0.0297615	hypo	0
chr13	99246603	99702594	4419	-0.130196	0.734168	0.864365	0.0297978	hypo	0
chr7	21545689	21930528	2682	-0.216533	0.640045	0.856578	0.0300849	hypo	0
chr7	17987752	18570631	3299	-0.175205	0.672028	0.847233	0.030233	hypo	0
chr2	178493130	178974212	2532	-0.239457	0.58639	0.825847	0.0319246	hypo	0
chr11	62696864	63255152	2521	-0.242295	0.562826	0.805122	0.0318849	hypo	0
chr10	134607378	134899638	4459	-0.127079	0.67243	0.799509	0.0293981	hypo	0
chr17	13508724	13921824	2805	-0.232094	0.626558	0.858652	0.034625	hypo	0
chr12	130391771	130643781	3313	-0.18445	0.551465	0.735915	0.032493	hypo	0
chr14	92641055	92994837	3747	-0.151647	0.655939	0.807586	0.0296617	hypo	0
chr15	60305128	60637976	2406	-0.24656	0.589934	0.836494	0.0316002	hypo	0
chr8	19709100	20051018	2475	-0.245095	0.581434	0.82653	0.0323036	hypo	0
chr10	43316761	43625064	2787	-0.203907	0.561995	0.765902	0.0303225	hypo	0
chr10	79403713	79730797	3174	-0.183695	0.655891	0.839586	0.0311574	hypo	0
chr10	95662853	96070435	2644	-0.208953	0.609929	0.818882	0.0294717	hypo	0
chr3	39854862	40342844	2245	-0.270134	0.573302	0.843436	0.0322387	hypo	0
chr11	113198072	113599284	2845	-0.212432	0.596675	0.809107	0.0319744	hypo	0
chr8	1924324	2180425	3738	-0.165511	0.618521	0.784032	0.0328189	hypo	0
chr10	33282067	33620825	2998	-0.187739	0.636858	0.824597	0.0299908	hypo	0
chr3	3844604	4344087	2251	-0.272159	0.570311	0.84247	0.0328953	hypo	0
chr22	33970649	34309500	3516	-0.181083	0.691407	0.87249	0.0340665	hypo	0
chr1	179338572	179805370	2956	-0.203364	0.583629	0.786993	0.0319922	hypo	0
chrX	8706771	9302627	3936	-0.220559	0.598007	0.818565	0.0462196	hypo	0
chrX	20455588	21408556	3590	-0.243748	0.499685	0.743433	0.0467959	hypo	0
chr10	71565406	71810525	2128	-0.253793	0.539409	0.793202	0.0287798	hypo	0
chr12	131788206	132136919	3180	-0.178906	0.621877	0.800783	0.0304462	hypo	0
chr13	45155907	45488384	2816	-0.195841	0.678084	0.873925	0.029396	hypo	0
chr3	42854339	43272495	2999	-0.215749	0.598818	0.814567	0.0357681	hypo	0
chr12	47025944	47597610	2897	-0.192394	0.643122	0.835516	0.0296003	hypo	0
chr8	141651356	142038456	3273	-0.178374	0.703792	0.882166	0.0311961	hypo	0
chr18	54680521	55091920	2819	-0.200409	0.586762	0.787171	0.0304076	hypo	0
chr5	16939458	17209750	2802	-0.206165	0.644347	0.850512	0.0310941	hypo	0
chr9	27057474	27519024	3242	-0.175377	0.674107	0.849484	0.0303944	hypo	0
chr11	122949223	123295670	3447	-0.172053	0.650787	0.822841	0.0320403	hypo	0
chr5	172759631	173037063	2474	-0.228096	0.577427	0.805524	0.0304436	hypo	0
chr1	201510758	201799255	2623	-0.225065	0.580452	0.805517	0.0323574	hypo	0
chr3	50394808	50604613	2381	-0.240923	0.527567	0.76849	0.0309536	hypo	0
chr6	117056035	117580321	2313	-0.252681	0.518284	0.770965	0.031654	hypo	0
chr11	125773384	126047979	2977	-0.194732	0.627149	0.821881	0.031366	hypo	0
chr5	57333832	57750453	2071	-0.284039	0.55868	0.842718	0.03221	hypo	0
chr2	85286883	85539215	2825	-0.19512	0.613358	0.808478	0.0305171	hypo	0
chr3	100480614	101037475	2742	-0.210786	0.626519	0.837305	0.0313787	hypo	0
chr10	116237050	116595382	2902	-0.182319	0.629329	0.811648	0.0296304	hypo	0
chr8	91066094	91601877	2382	-0.24332	0.587049	0.830369	0.0316524	hypo	0
chr11	33377944	33718369	2642	-0.215155	0.611766	0.826921	0.0313111	hypo	0
chr12	68091432	68689425	3314	-0.161495	0.701759	0.863253	0.0292465	hypo	0
chr14	32969006	33399915	2322	-0.253796	0.580481	0.834278	0.0330125	hypo	0
chr1	229805614	230200298	2981	-0.187939	0.671613	0.859552	0.0306863	hypo	0
chr15	59984596	60286612	2339	-0.234262	0.587712	0.821974	0.0302638	hypo	0
chrX	111033635	111907450	3660	-0.228045	0.564822	0.792867	0.0463316	hypo	0
chr4	111123639	111532308	2575	-0.207363	0.62107	0.828433	0.02985	hypo	0
chr2	206573331	206851425	2610	-0.209247	0.634005	0.843252	0.0308897	hypo	0
chr3	129931672	130382352	2419	-0.233772	0.576484	0.810256	0.0314278	hypo	0
chr3	138668233	139051770	2482	-0.232354	0.551705	0.78406	0.0323315	hypo	0
chr1	62506303	62894466	3712	-0.151059	0.702466	0.853525	0.031257	hypo	0
chr12	64243640	64582509	2367	-0.228103	0.649701	0.877804	0.029949	hypo	0
chr7	54390658	54805414	2445	-0.24091	0.530827	0.771737	0.0336667	hypo	0
chr21	35019164	35269821	2585	-0.20145	0.68925	0.8907	0.0289869	hypo	0
chr18	70212023	70532386	2427	-0.220322	0.587212	0.807533	0.0298728	hypo	0
chr8	43122755	43806112	2933	-0.2025	0.451643	0.654144	0.0339575	hypo	0
chr14	57283891	57670905	2614	-0.209693	0.571946	0.781639	0.0305652	hypo	0
chr20	50156085	50381502	2967	-0.172691	0.645891	0.818582	0.0289123	hypo	0
chr14	56156365	56578495	2610	-0.210229	0.655433	0.865662	0.0309742	hypo	0
chr4	83417793	83715526	2455	-0.214937	0.635874	0.850811	0.0300317	hypo	0
chr12	110032649	110284426	2989	-0.179382	0.591973	0.771355	0.0304152	hypo	0
chr20	44049104	44418243	2297	-0.22027	0.573003	0.793273	0.0284193	hypo	0
chrX	57842737	58574806	3743	-0.218194	0.489834	0.708028	0.0460367	hypo	0
chr7	20394117	20816186	2625	-0.203321	0.637023	0.840344	0.0300962	hypo	0
chr12	102617589	103341964	3635	-0.142567	0.657942	0.800509	0.0291742	hypo	0
chr15	29566547	29858907	2587	-0.205328	0.627013	0.832341	0.0299011	hypo	0
chr2	84704135	85104196	2210	-0.236236	0.609089	0.845325	0.0296775	hypo	0
chr1	222174700	222641501	2585	-0.227213	0.603777	0.83099	0.0332961	hypo	0
chr6	130686200	131158886	2582	-0.216513	0.633537	0.850049	0.0319814	hypo	0
chr11	9772995	10313882	3489	-0.15736	0.728779	0.886139	0.0314601	hypo	0
chr20	524791	811060	2881	-0.183034	0.553686	0.73672	0.0314087	hypo	0
chr4	10118285	10437503	2120	-0.247914	0.541845	0.789759	0.0301085	hypo	0
chr13	57747727	58201039	1905	-0.283632	0.528244	0.811876	0.0309087	hypo	0
chr20	833512	1093802	2227	-0.22813	0.572673	0.800803	0.029175	hypo	0
chr15	51312014	51779934	3237	-0.16203	0.635174	0.797204	0.0299453	hypo	0
chr2	160798377	161261109	2987	-0.17828	0.658811	0.837091	0.0303473	hypo	0
chr6	84942855	85469841	2260	-0.25651	0.536839	0.793349	0.0333004	hypo	0
chr13	112504092	112706919	2715	-0.195227	0.611335	0.806562	0.0305662	hypo	0
chr1	197178360	197735261	2647	-0.249623	0.629244	0.878867	0.0410316	hypo	0
chr12	51826765	52206775	2592	-0.207309	0.633873	0.841182	0.0311301	hypo	0
chr1	64939632	65297798	2345	-0.240372	0.614109	0.854481	0.0322462	hypo	0
chr5	98921171	99380453	1981	-0.278467	0.522321	0.800788	0.031561	hypo	0
chr5	21522963	21935146	2210	-0.241306	0.573384	0.81469	0.030427	hypo	0
chr1	112533649	112934572	2217	-0.251193	0.507875	0.759068	0.0325637	hypo	0
chr22	45835434	46059950	3089	-0.173044	0.638108	0.811152	0.0306108	hypo	0
chr7	137712271	138139500	2871	-0.181536	0.680263	0.861799	0.0298078	hypo	0
chr7	282690	554652	4009	-0.131593	0.675235	0.806828	0.0303232	hypo	0
chr10	120104891	120429135	2442	-0.209144	0.546881	0.756025	0.0291789	hypo	0
chr1	74673341	75174567	2345	-0.231661	0.593222	0.824882	0.0313968	hypo	0
chr17	61046358	61510073	2867	-0.195354	0.683102	0.878456	0.0322736	hypo	0
chr3	120474659	121133210	2429	-0.228998	0.580607	0.809605	0.0320029	hypo	0
chr4	114832537	115512445	2795	-0.196971	0.616192	0.813163	0.0318247	hypo	0
chr9	2849626	3224012	2258	-0.243408	0.569031	0.812439	0.0318979	hypo	0
chr9	92679169	92983425	2380	-0.218796	0.607825	0.826621	0.0300088	hypo	0
chr10	23012136	23457884	3160	-0.165944	0.691572	0.857516	0.0307601	hypo	0
chr9	95905524	96196759	3038	-0.180847	0.637916	0.818763	0.0322808	hypo	0
chr2	99352050	99712882	2804	-0.185318	0.647068	0.832386	0.0300709	hypo	0
chr7	119926910	120583689	3288	-0.170244	0.643655	0.813899	0.0328583	hypo	0
chr2	158283353	158729158	2654	-0.194829	0.650764	0.845593	0.0302625	hypo	0
chr14	51752526	52113617	2340	-0.227761	0.605699	0.833459	0.0310614	hypo	0
chr20	29804018	30097945	2563	-0.194609	0.543384	0.737993	0.029191	hypo	0
chr1	15485331	15738532	3203	-0.166826	0.636719	0.803545	0.030943	hypo	0
chr1	94383422	94699267	2332	-0.234728	0.584616	0.819344	0.0319971	hypo	0
chr18	74241423	74521892	3661	-0.14182	0.685202	0.827022	0.0302559	hypo	0
chr16	12669396	12994994	3487	-0.154797	0.698394	0.85319	0.0312982	hypo	0
chr13	100312810	100607185	3239	-0.175257	0.677596	0.852852	0.0345428	hypo	0
chr10	12859812	13144874	2842	-0.182291	0.63838	0.82067	0.0305772	hypo	0
chr5	52984058	53600665	3664	-0.142871	0.75871	0.90158	0.0304147	hypo	0
chr1	8088004	8372311	3630	-0.149338	0.687279	0.836617	0.0317627	hypo	0
chr17	76426443	76660529	3641	-0.146145	0.708576	0.85472	0.0309666	hypo	0
chr1	119741921	120175489	2528	-0.212193	0.611911	0.824104	0.0317958	hypo	0
chr18	45664506	45932546	2169	-0.235823	0.543777	0.7796	0.0299816	hypo	0
chr5	132952281	133259911	2511	-0.208959	0.600215	0.809174	0.0307585	hypo	0
chr2	11055687	11289296	2533	-0.197609	0.618933	0.816542	0.0296588	hypo	0
chr20	16021240	16548383	3631	-0.133594	0.748014	0.881608	0.0284233	hypo	0
chr11	34493458	34901315	2584	-0.206404	0.644371	0.850775	0.0312283	hypo	0
chr9	98283854	98627374	3327	-0.152791	0.689867	0.842657	0.0298836	hypo	0
chr9	2203758	2617187	2328	-0.223854	0.596709	0.820563	0.03071	hypo	0
chr13	19450128	19945386	2576	-0.200045	0.55039	0.750435	0.030446	hypo	0
chr2	200336657	200707263	2340	-0.228306	0.599693	0.827999	0.0323004	hypo	0
chr15	69118423	69449518	2501	-0.198872	0.602746	0.801618	0.0292733	hypo	0
chr2	69244323	69533879	2091	-0.240618	0.589044	0.829662	0.0299879	hypo	0
chr7	93632031	94128975	2728	-0.193535	0.635165	0.8287	0.0311053	hypo	0
chr3	41289217	41923751	3456	-0.15112	0.755994	0.907114	0.030824	hypo	0
chr15	84329240	84828041	2563	-0.213016	0.621473	0.834489	0.0331133	hypo	0
chr6	99392062	99790365	2293	-0.233884	0.573566	0.80745	0.0317709	hypo	0
chr4	81963339	82386152	2272	-0.233679	0.59545	0.829129	0.0317213	hypo	0
chr20	44755794	44986687	2571	-0.193181	0.501787	0.694968	0.0295871	hypo	0
chr15	67004979	67324128	3029	-0.171573	0.645421	0.816994	0.0312556	hypo	0
chr21	43005688	43184667	2553	-0.200227	0.597982	0.79821	0.0308256	hypo	0
chr5	93449814	93942310	2440	-0.212125	0.684414	0.896539	0.0308388	hypo	0
chr2	9350330	9542215	2361	-0.211084	0.66496	0.876045	0.0300221	hypo	0
chr15	74430960	74669259	2471	-0.210455	0.55735	0.767806	0.032319	hypo	0
chr1	108019895	108499133	2679	-0.209098	0.623255	0.832353	0.0332459	hypo	0
chr6	80259207	80707462	2461	-0.225108	0.570763	0.795871	0.0334653	hypo	0
chr6	131461568	131897496	2399	-0.219027	0.664291	0.883318	0.0312229	hypo	0
chr4	77229194	77604728	2579	-0.200287	0.62171	0.821997	0.0310994	hypo	0
chr2	113522090	113929954	2927	-0.168944	0.641226	0.81017	0.0295938	hypo	0
chr11	5737911	6227168	2262	-0.229087	0.589632	0.818718	0.0308809	hypo	0
chr5	107011406	107634957	3460	-0.152034	0.736113	0.888147	0.0310724	hypo	0
chr2	239832051	240075788	3543	-0.140406	0.742309	0.882715	0.0296731	hypo	0
chr7	12256982	12718768	2569	-0.215345	0.59566	0.811005	0.0336881	hypo	0
chr18	47017357	47304579	2574	-0.196108	0.598174	0.794282	0.0306726	hypo	0
chr11	59589407	60127908	2837	-0.180517	0.66449	0.845007	0.0306468	hypo	0
chr2	18757500	19188268	2267	-0.252662	0.601767	0.854429	0.0349711	hypo	0
chr10	106108772	106394728	1881	-0.252448	0.545443	0.797891	0.028618	hypo	0
chr12	70204247	70649448	2354	-0.213734	0.624695	0.838429	0.0305739	hypo	0
chr6	138433562	138719518	2206	-0.243834	0.609494	0.853328	0.0327107	hypo	0
chr14	88469959	88783951	2178	-0.228604	0.593422	0.822027	0.0302522	hypo	0
chr2	70531659	70776786	1832	-0.262385	0.562131	0.824516	0.0289626	hypo	0
chr8	94940176	95362689	2857	-0.182008	0.633949	0.815957	0.0313265	hypo	0
chr5	78992554	79387616	2828	-0.184293	0.667815	0.852108	0.0318139	hypo	0
chr9	125138922	125576394	2450	-0.218598	0.608103	0.826701	0.033275	hypo	0
chr4	190506269	190804498	2500	-0.191432	0.489166	0.680598	0.0289734	hypo	0
chr21	39870109	40104813	2100	-0.240033	0.579563	0.819596	0.0309931	hypo	0
chr18	8708732	9005150	2730	-0.18356	0.653382	0.836943	0.0303928	hypo	0
chr3	179690027	180315011	2881	-0.192026	0.610501	0.802527	0.0337612	hypo	0
chr8	29396378	29909908	3714	-0.138288	0.721824	0.860112	0.0313525	hypo	0
chr1	210030061	210401411	2097	-0.258863	0.560946	0.819809	0.0331402	hypo	0
chrX	17771386	18370122	3437	-0.218572	0.574822	0.793394	0.0460062	hypo	0
chr7	36491810	36887915	2757	-0.176154	0.677906	0.85406	0.0295737	hypo	0
chr6	133144268	133561948	2299	-0.244335	0.571852	0.816187	0.0348468	hypo	0
chr15	62362768	62678523	2390	-0.205898	0.614307	0.820205	0.0303431	hypo	0
chr1	181077293	181453022	2722	-0.187541	0.553359	0.7409	0.0314234	hypo	0
chr2	110251529	110494481	2448	-0.198583	0.632191	0.830775	0.0300786	hypo	0
chr1	92354372	92707138	2723	-0.185558	0.67789	0.863448	0.0308559	hypo	0
chr4	123285552	123741202	2407	-0.197334	0.642414	0.839748	0.0290373	hypo	0
chr8	22563927	22827803	2945	-0.173883	0.631218	0.805101	0.0313792	hypo	0
chr11	32127881	32445632	2483	-0.204025	0.624305	0.82833	0.0311567	hypo	0
chrX	132556889	133289457	3661	-0.209788	0.578189	0.787977	0.0472126	hypo	0
chr11	94981305	95504784	2773	-0.184382	0.681074	0.865456	0.0314283	hypo	0
chrX	10193759	10738213	3308	-0.229474	0.545586	0.77506	0.0469703	hypo	0
chr4	7966744	8157495	2969	-0.158531	0.603947	0.762478	0.0288188	hypo	0
chr6	15668433	16128345	3416	-0.148175	0.704588	0.852764	0.0310375	hypo	0
chr11	92938809	93389127	2553	-0.19979	0.627964	0.827754	0.0315317	hypo	0
chr19	34312867	34621229	2840	-0.220737	0.57473	0.795467	0.0387089	hypo	0
chr7	27292772	27649729	2437	-0.201231	0.668916	0.870146	0.0302339	hypo	0
chr18	13222799	13455605	2815	-0.175054	0.661575	0.836628	0.0308841	hypo	0
chr8	685789	936949	3202	-0.171197	0.642879	0.814077	0.0347293	hypo	0
chr2	43048311	43355864	3092	-0.152945	0.648494	0.801439	0.0292548	hypo	0
chr15	73982156	74213450	2025	-0.233989	0.51901	0.752999	0.02929	hypo	0
chr5	50270591	50673453	1952	-0.264887	0.535673	0.80056	0.0322538	hypo	0
chr4	68612615	69059462	2165	-0.220167	0.615072	0.835239	0.0296437	hypo	0
chr19	29709534	30013848	2766	-0.222489	0.530204	0.752693	0.0383661	hypo	0
chr12	30913655	31195451	2229	-0.222453	0.577362	0.799815	0.0315275	hypo	0
chr1	18976852	19223079	2835	-0.180136	0.542273	0.722409	0.0320159	hypo	0
chr1	91492588	91964714	2514	-0.205918	0.609544	0.815462	0.0327216	hypo	0
chr1	214166465	214447498	2168	-0.234222	0.555197	0.789419	0.0319566	hypo	0
chr6	108888048	109159652	2232	-0.223983	0.650305	0.874287	0.0314175	hypo	0
chr5	176084557	176329339	3329	-0.149787	0.557228	0.707016	0.0314228	hypo	0
chr1	171774327	172494846	3497	-0.145897	0.698144	0.84404	0.0317347	hypo	0
chr16	24231308	24546648	2632	-0.190517	0.611079	0.801596	0.0318978	hypo	0
chr1	242083600	242424067	2866	-0.177093	0.648998	0.826091	0.0318286	hypo	0
chr20	36787801	37035200	2526	-0.181895	0.615934	0.79783	0.0289955	hypo	0
chr14	89292814	89622370	2375	-0.203332	0.621891	0.825223	0.0303807	hypo	0
chr10	115941882	116159469	2251	-0.201623	0.625311	0.826935	0.0287975	hypo	0
chr4	56920179	57208209	2156	-0.223148	0.675785	0.898933	0.0304363	hypo	0
chr2	196595210	196966529	2021	-0.232185	0.61441	0.846595	0.0294562	hypo	0
chr9	93661310	93948841	2729	-0.175598	0.655517	0.831115	0.0303215	hypo	0
chr8	144107231	144336424	3256	-0.15445	0.635322	0.789772	0.0318465	hypo	0
chr8	38329826	38613938	2627	-0.189317	0.617862	0.807179	0.0314782	hypo	0
chr3	97691693	98225202	2361	-0.218437	0.596745	0.815182	0.0326223	hypo	0
chr16	55368643	55689492	2149	-0.24908	0.510953	0.760032	0.0349534	hypo	0
chr1	86183496	86815945	2756	-0.183812	0.636676	0.820488	0.032474	hypo	0
chr15	29866600	30110345	2237	-0.214839	0.601263	0.816102	0.0305333	hypo	0
chr20	20041295	20340074	2254	-0.200271	0.633237	0.833507	0.0287538	hypo	0
chr13	95961670	96293645	2836	-0.166528	0.643128	0.809655	0.0297937	hypo	0
chr9	32574833	32949628	2388	-0.208232	0.565992	0.774225	0.0315985	hypo	0
chr14	24047154	24413432	2083	-0.225134	0.58935	0.814484	0.029633	hypo	0
chr6	19843813	20176252	2623	-0.194153	0.64228	0.836433	0.0322546	hypo	0
chr5	134881821	135168829	2305	-0.21359	0.552835	0.766425	0.0314159	hypo	0
chr9	21397029	21798600	2063	-0.234938	0.55602	0.790957	0.0310005	hypo	0
chr20	47915057	48095815	2002	-0.223701	0.55296	0.776661	0.0287119	hypo	0
chr12	75904412	76418863	3151	-0.165629	0.680677	0.846306	0.0337148	hypo	0
chr21	37803756	38064064	2885	-0.169134	0.646602	0.815736	0.0312828	hypo	0
chr5	139132009	139415676	2539	-0.197487	0.532769	0.730257	0.032174	hypo	0
chr10	13396988	13625442	2722	-0.168973	0.659413	0.828386	0.0295795	hypo	0
chr7	49814502	50180345	1949	-0.249163	0.526988	0.776151	0.0316432	hypo	0
chr5	33485577	33928320	2693	-0.18016	0.635944	0.816104	0.0310103	hypo	0
chr7	16797770	17327281	2955	-0.159457	0.7026	0.862057	0.0299912	hypo	0
chr15	68577488	68868264	2583	-0.18186	0.593099	0.774959	0.0303661	hypo	0
chr4	89538760	90024895	2744	-0.1757	0.698648	0.874348	0.0314946	hypo	0
chr17	66603280	67032890	2877	-0.174303	0.666751	0.841054	0.0321419	hypo	0
chr1	61248455	61540381	2134	-0.230296	0.541483	0.771779	0.0316299	hypo	0
chr2	20556568	20858713	3113	-0.146184	0.664017	0.810201	0.0293554	hypo	0
chr16	3937551	4163865	3484	-0.138292	0.708239	0.846531	0.0310433	hypo	0
chr10	133800805	133995422	2778	-0.162955	0.614426	0.777381	0.029201	hypo	0
chr6	8108555	8416470	2256	-0.216865	0.629746	0.846612	0.0318426	hypo	0
chr9	101570380	101862280	2629	-0.186095	0.639833	0.825928	0.0322387	hypo	0
chr11	123307163	123593791	2801	-0.181298	0.636938	0.818236	0.0343027	hypo	0
chr12	63032249	63325748	2266	-0.210108	0.640632	0.85074	0.0313329	hypo	0
chr3	46035653	46535087	3306	-0.147078	0.66446	0.811538	0.0314848	hypo	0
chr8	143826742	144094410	2600	-0.188168	0.616936	0.805104	0.0318406	hypo	0
chr10	71339886	71554474	1890	-0.241202	0.543867	0.785069	0.0300684	hypo	0
chr10	120520273	120785433	2283	-0.1945	0.633491	0.827991	0.0287077	hypo	0
chr21	46713257	46925951	3190	-0.143533	0.642994	0.786526	0.0299115	hypo	0
chr6	125682607	126065290	2086	-0.231921	0.579634	0.811555	0.0314106	hypo	0
chr3	13128881	13322657	2517	-0.189034	0.608984	0.798018	0.030897	hypo	0
chr17	21128563	21399028	3463	-0.140746	0.539912	0.680658	0.031646	hypo	0
chr6	148669945	149060913	3394	-0.142838	0.694004	0.836842	0.0315563	hypo	0
chr22	25445743	25673066	2323	-0.206662	0.579104	0.785766	0.0317069	hypo	0
chr2	175551945	175863308	2300	-0.197099	0.629159	0.826258	0.0296869	hypo	0
chr7	26442823	26697878	2292	-0.202314	0.664471	0.866785	0.0301808	hypo	0
chr12	3987113	4263469	2739	-0.16645	0.63322	0.799671	0.0297683	hypo	0
chr5	89012055	89692919	2923	-0.159909	0.713398	0.873307	0.030495	hypo	0
chr5	36250563	36601039	2138	-0.222395	0.608827	0.831222	0.0313509	hypo	0
chr3	150487715	150804900	2122	-0.225614	0.612849	0.838462	0.0316134	hypo	0
chr20	1436913	1780107	2127	-0.202783	0.584645	0.787428	0.0284021	hypo	0
chr5	98323392	98726467	2167	-0.218773	0.603884	0.822656	0.0312755	hypo	0
chr1	117211368	117584750	2844	-0.167892	0.666969	0.834861	0.0316045	hypo	0
chr12	124252653	124452273	2691	-0.165656	0.718413	0.884069	0.0292435	hypo	0
chr17	72210660	72424022	3017	-0.163591	0.614592	0.778184	0.0327804	hypo	0
chr11	44345356	44580581	2054	-0.228002	0.550089	0.778091	0.030786	hypo	0
chr13	30428389	30690249	2342	-0.199474	0.630306	0.829781	0.0310706	hypo	0
chr1	44882843	45094600	2178	-0.214477	0.611721	0.826198	0.0308337	hypo	0
chr9	74603484	74973278	2868	-0.158597	0.688888	0.847486	0.0299149	hypo	0
chr3	15915624	16302213	2476	-0.196677	0.656538	0.853215	0.0321678	hypo	0
chr1	162801557	163214989	2192	-0.227745	0.58334	0.811085	0.0333156	hypo	0
chr11	88080180	88567143	2237	-0.213151	0.582464	0.795615	0.0314865	hypo	0
chr2	120147720	120434343	2472	-0.177478	0.613782	0.79126	0.0290298	hypo	0
chr3	60321	612051	3460	-0.170652	0.636346	0.806998	0.0407029	hypo	0
chr1	172578962	173168780	2699	-0.171629	0.666742	0.838371	0.0306354	hypo	0
chr6	132277858	132710153	2280	-0.209522	0.630175	0.839697	0.0318657	hypo	0
chr7	73269115	73497002	2672	-0.173395	0.655282	0.828677	0.0310832	hypo	0
chr1	112312243	112531177	1849	-0.260848	0.536608	0.797456	0.0326421	hypo	0
chr18	13765522	14079526	2335	-0.203409	0.592406	0.795815	0.0320361	hypo	0
chr4	25925290	26313215	3357	-0.129897	0.727205	0.857102	0.0289834	hypo	0
chr8	18874848	19168353	2357	-0.205277	0.620833	0.82611	0.0322052	hypo	0
chr5	76387073	76722442	2376	-0.203171	0.642934	0.846105	0.0329345	hypo	0
chr16	10579284	10836231	2852	-0.167298	0.65808	0.825378	0.0319878	hypo	0
chr15	96597834	96863627	2211	-0.199739	0.593071	0.79281	0.0293659	hypo	0
chr19	27731847	28257164	2806	-0.20384	0.473927	0.677767	0.0380745	hypo	0
chr17	60806054	61040461	2290	-0.206438	0.645663	0.852101	0.0315924	hypo	0
chr17	3148787	3481336	2614	-0.185722	0.647902	0.833625	0.032942	hypo	0
chr12	72318260	72664897	1750	-0.251111	0.544245	0.795356	0.0292793	hypo	0
chr13	95367905	95662131	2109	-0.210996	0.610057	0.821054	0.0297571	hypo	0
chr14	58341002	58665740	1985	-0.233192	0.550284	0.783476	0.031052	hypo	0
chr21	45882936	46121992	2696	-0.162609	0.652258	0.814867	0.0292849	hypo	0
chrX	6147962	6648392	2989	-0.227248	0.605113	0.832361	0.045382	hypo	0
chr10	124139965	124360189	2069	-0.207429	0.545736	0.753165	0.0287766	hypo	0
chr1	15256356	15474440	2929	-0.172179	0.660598	0.832777	0.0347631	hypo	0
chr4	37248181	37603381	2252	-0.203786	0.580897	0.784683	0.0322882	hypo	0
chr3	39463590	39844749	1995	-0.23512	0.581675	0.816795	0.0317144	hypo	0
chr1	200015576	200359087	2949	-0.160632	0.677358	0.83799	0.0320026	hypo	0
chr15	101839656	102028613	2766	-0.163398	0.63875	0.802148	0.0307626	hypo	0
chr10	46959737	47152957	2032	-0.213165	0.53182	0.744985	0.0290391	hypo	0
chr3	71128280	71432454	2894	-0.164883	0.669965	0.834848	0.0322972	hypo	0
chr15	101195528	101454780	2757	-0.158501	0.637998	0.796499	0.0293057	hypo	0
chrX	7906030	8501669	2952	-0.229039	0.617695	0.846734	0.0453386	hypo	0
chr3	149697005	150087007	2323	-0.202297	0.642211	0.844508	0.0316614	hypo	0
chr12	54955747	55335930	2031	-0.216509	0.591531	0.80804	0.0295675	hypo	0
chrX	41791654	42717775	3910	-0.182197	0.645384	0.82758	0.0478359	hypo	0
chr12	47614336	48031492	2559	-0.174018	0.680572	0.85459	0.030301	hypo	0
chr6	101337154	101841055	2033	-0.247619	0.550689	0.798308	0.0342509	hypo	0
chr8	62057579	62610926	3069	-0.178202	0.661409	0.839612	0.0386569	hypo	0
chr10	5504138	5703225	2644	-0.163808	0.670904	0.834712	0.0294241	hypo	0
chr2	11621095	11808962	2439	-0.179631	0.650573	0.830204	0.0296884	hypo	0
chr10	7566866	7789305	2466	-0.17265	0.672514	0.845164	0.0290033	hypo	0
chr9	90756202	90999361	2170	-0.208913	0.630033	0.838946	0.0306309	hypo	0
chr4	187650577	187880312	1943	-0.237506	0.590374	0.82788	0.0323833	hypo	0
chr8	27701658	27951793	2437	-0.193563	0.591914	0.785477	0.0322835	hypo	0
chr8	133494224	133779942	1836	-0.264432	0.549365	0.813797	0.0341028	hypo	0
chr2	207319482	207625198	1981	-0.215959	0.599235	0.815194	0.0291958	hypo	0
chr17	77824019	78005716	3005	-0.154218	0.661101	0.815319	0.0317322	hypo	0
chr17	8930162	9152986	2850	-0.160123	0.689259	0.849382	0.0310582	hypo	0
chr1	42244067	42637497	2692	-0.170652	0.640608	0.81126	0.0317693	hypo	0
chr10	1777557	1977704	2004	-0.218351	0.598069	0.81642	0.0309641	hypo	0
chr3	142846548	143516113	3676	-0.123818	0.755047	0.878866	0.0311237	hypo	0
chr17	72486978	72731910	2604	-0.177694	0.59396	0.771654	0.0317872	hypo	0
chr4	94756779	95131075	1806	-0.248926	0.574439	0.823365	0.0307694	hypo	0
chr9	133815188	133996846	2549	-0.172191	0.616391	0.788582	0.0301521	hypo	0
chr2	98705532	98962874	2160	-0.19639	0.664724	0.861114	0.0290201	hypo	0
chr15	98971800	99187464	2228	-0.205052	0.608902	0.813954	0.0322122	hypo	0
chr3	31692900	31992759	2493	-0.192032	0.689944	0.881976	0.0337046	hypo	0
chr10	97078752	97317295	2079	-0.199696	0.66087	0.860566	0.0284486	hypo	0
chr5	147819490	148186249	1914	-0.245509	0.557149	0.802658	0.0323382	hypo	0
chr8	66942395	67335826	2532	-0.1826	0.608857	0.791457	0.032032	hypo	0
chr6	138731963	139008845	2574	-0.178102	0.684556	0.862658	0.0318073	hypo	0
chr7	38433840	38757678	2029	-0.221047	0.618997	0.840043	0.0310681	hypo	0
chr11	55076447	55627749	2103	-0.23989	0.453385	0.693275	0.0370067	hypo	0
chr3	137493275	137877141	2179	-0.22097	0.58101	0.801981	0.0335037	hypo	0
chr8	25045462	25275679	2130	-0.2139	0.640812	0.854712	0.0315296	hypo	0
chr2	739779	942792	2339	-0.182422	0.640265	0.822688	0.029775	hypo	0
chr17	29889494	30177419	2535	-0.180113	0.679181	0.859294	0.0315689	hypo	0
chr3	14730913	14985323	2356	-0.19233	0.619273	0.811603	0.0313896	hypo	0
chr13	24475786	24731313	2305	-0.19116	0.631857	0.823018	0.0308818	hypo	0
chr4	9801872	10064338	2162	-0.195916	0.630052	0.825968	0.0297063	hypo	0
chr9	135285018	135452310	2466	-0.180097	0.601397	0.781493	0.0307786	hypo	0
chr2	16087221	16279578	1925	-0.231477	0.597699	0.829176	0.0316491	hypo	0
chr7	107647563	108090625	2735	-0.160973	0.662786	0.823759	0.0308301	hypo	0
chr19	41333251	41765897	3056	-0.185957	0.613844	0.799801	0.0394971	hypo	0
chr6	42185003	42417724	2243	-0.199498	0.661123	0.860621	0.0310621	hypo	0
chr11	35256957	35632672	2498	-0.183206	0.601454	0.78466	0.0322819	hypo	0
chr11	76781242	77037319	2437	-0.18909	0.626762	0.815852	0.0327466	hypo	0
chr12	185491	383971	2413	-0.182108	0.605729	0.787837	0.0309663	hypo	0
chr7	157213396	157401872	2974	-0.143575	0.690897	0.834473	0.0297256	hypo	0
chr12	65180147	65549662	2110	-0.202924	0.595738	0.798662	0.030254	hypo	0
chr7	17394262	17826489	2344	-0.185602	0.673864	0.859467	0.0302096	hypo	0
chr15	30119700	30368815	2101	-0.203856	0.608857	0.812714	0.0299171	hypo	0
chr7	98248474	98473387	2620	-0.16699	0.615012	0.782003	0.0306854	hypo	0
chr3	123335302	123597735	1981	-0.226018	0.613406	0.839424	0.0313942	hypo	0
chrX	103504079	104127170	2832	-0.233648	0.514725	0.748373	0.0462522	hypo	0
chr5	135175288	135482664	2329	-0.210425	0.561119	0.771545	0.0348424	hypo	0
chr4	10905813	11423290	2959	-0.13944	0.708234	0.847674	0.0287892	hypo	0
chr12	107389942	107709034	1913	-0.224493	0.595534	0.820027	0.0303687	hypo	0
chr2	131484953	131714447	2471	-0.17479	0.602847	0.777637	0.0306797	hypo	0
chr21	44866331	45072081	2246	-0.186263	0.658345	0.844609	0.0295307	hypo	0
chr1	244224999	244506858	3027	-0.144847	0.699891	0.844738	0.0307031	hypo	0
chr14	97039705	97262593	2332	-0.182508	0.599236	0.781744	0.0303253	hypo	0
chr1	97299662	97881773	2794	-0.159345	0.708993	0.868338	0.0311058	hypo	0
chrX	39141831	39670488	3472	-0.18999	0.587108	0.777098	0.0465514	hypo	0
chr10	93173851	93552512	2021	-0.205665	0.627349	0.833013	0.0295038	hypo	0
chr4	119764335	120130064	2107	-0.194136	0.651693	0.84583	0.0287507	hypo	0
chr11	13989610	14291844	1774	-0.25791	0.567182	0.825092	0.0324038	hypo	0
chr10	98735569	98946238	2485	-0.163052	0.634735	0.797786	0.028607	hypo	0
chr6	83919784	84414186	2229	-0.202617	0.616557	0.819174	0.0322941	hypo	0
chr1	95012631	95382189	2720	-0.17189	0.645249	0.817139	0.0337715	hypo	0
chr20	52531755	52824352	2727	-0.148011	0.639286	0.787297	0.0285168	hypo	0
chr17	15167095	15405249	2267	-0.202181	0.633889	0.83607	0.0324095	hypo	0
chr6	152133187	152443687	1956	-0.241857	0.649717	0.891574	0.033605	hypo	0
chr1	165886556	166208917	1863	-0.23829	0.536035	0.774325	0.0315521	hypo	0
chr17	142	232655	3008	-0.149454	0.656366	0.80582	0.0321094	hypo	0
chr8	82201366	82561003	1901	-0.234471	0.598424	0.832895	0.0318913	hypo	0
chr5	101638179	102085456	1935	-0.227069	0.599825	0.826894	0.0313035	hypo	0
chr11	50324379	50783540	2111	-0.221986	0.40024	0.622227	0.0335698	hypo	0
chr1	39041784	39324393	2334	-0.191787	0.576	0.767787	0.031923	hypo	0
chr1	16305690	16551541	2938	-0.149947	0.604109	0.754056	0.0312496	hypo	0
chr20	62722867	62880127	2150	-0.192206	0.618438	0.810644	0.0300799	hypo	0
chr5	141036168	141254431	2138	-0.204963	0.511599	0.716562	0.0315072	hypo	0
chr14	36345190	36770712	2602	-0.162982	0.651361	0.814343	0.030151	hypo	0
chr16	81132342	81340622	2691	-0.162418	0.660158	0.822575	0.0312391	hypo	0
chr5	95343284	95885547	2751	-0.157947	0.662446	0.820393	0.0308175	hypo	0
chr10	15217356	15411504	2270	-0.17862	0.660954	0.839574	0.0289109	hypo	0
chr7	3134645	3338107	2278	-0.185455	0.625718	0.811173	0.0305155	hypo	0
chr9	113801759	114114939	1817	-0.243566	0.588912	0.832478	0.0318824	hypo	0
chr10	124376761	124593935	1677	-0.247108	0.547887	0.794995	0.0297858	hypo	0
chrX	61682332	62348171	2769	-0.234713	0.454538	0.68925	0.0466073	hypo	0
chr18	5303177	5540258	1743	-0.245917	0.593961	0.839878	0.0308968	hypo	0
chr20	43274924	43513773	2356	-0.170762	0.586613	0.757376	0.0291189	hypo	0
chr2	200844500	201166732	1830	-0.236185	0.606097	0.842282	0.0312613	hypo	0
chr22	33700318	33966256	2768	-0.154155	0.720253	0.874408	0.030545	hypo	0
chr1	170032161	170493457	1968	-0.230495	0.568349	0.798844	0.0329691	hypo	0
chr7	98035423	98245438	2196	-0.195252	0.615382	0.810634	0.0306613	hypo	0
chr4	15853976	16080128	1998	-0.203682	0.627999	0.831681	0.0293492	hypo	0
chr7	20415	231950	2535	-0.165066	0.658906	0.823972	0.030074	hypo	0
chr8	32410520	32679883	1675	-0.260551	0.522346	0.782897	0.0315345	hypo	0
chr3	42274465	42594019	2230	-0.19676	0.571962	0.768722	0.0315959	hypo	0
chr22	46757734	46928745	2904	-0.14754	0.698617	0.846156	0.0309441	hypo	0
chr1	205202574	205424310	2353	-0.180992	0.558546	0.739538	0.0306869	hypo	0
chr9	136453904	136621653	2383	-0.176724	0.596367	0.77309	0.0304165	hypo	0
chr2	103017499	103335499	2111	-0.193872	0.624308	0.81818	0.0296229	hypo	0
chr5	20939066	21271412	1684	-0.255583	0.586193	0.841776	0.0310852	hypo	0
chr9	84309108	84532813	1976	-0.216779	0.667791	0.884571	0.0310015	hypo	0
chr11	3075726	3267624	2494	-0.174783	0.61372	0.788503	0.0316362	hypo	0
chr7	71804786	72032171	1929	-0.214238	0.632082	0.84632	0.0299126	hypo	0
chr1	219786701	220142158	2086	-0.22738	0.562106	0.789485	0.0352914	hypo	0
chr16	22827567	23082824	1971	-0.219907	0.565667	0.785574	0.031517	hypo	0
chr15	81016678	81229200	2041	-0.201538	0.612876	0.814414	0.0300786	hypo	0
chr1	13774053	13990397	2435	-0.174847	0.617595	0.792442	0.0308688	hypo	0
chr6	82468999	82860785	1785	-0.246045	0.588572	0.834617	0.0319723	hypo	0
chrX	139596279	140077642	2927	-0.216377	0.567785	0.784162	0.0458215	hypo	0
chr1	54962101	55179810	2093	-0.216	0.622855	0.838855	0.0340179	hypo	0
chr6	151819857	152124075	2215	-0.198291	0.649299	0.84759	0.0319934	hypo	0
chr13	31317076	31614347	2708	-0.155064	0.670002	0.825067	0.031192	hypo	0
chr4	81194889	81945121	3199	-0.162623	0.694124	0.856747	0.0391593	hypo	0
chr11	113752292	113927894	1837	-0.248406	0.576917	0.825323	0.0337276	hypo	0
chr20	61924889	62141636	3367	-0.119049	0.612799	0.731848	0.0294359	hypo	0
chr6	3282204	3451896	2226	-0.191679	0.648071	0.839749	0.0310094	hypo	0
chr16	84822988	85004780	2844	-0.149434	0.661517	0.810951	0.0309947	hypo	0
chr2	95879877	96063326	1943	-0.206672	0.61828	0.824952	0.0295775	hypo	0
chr19	46520915	46844703	2731	-0.191892	0.56172	0.753612	0.0382848	hypo	0
chr2	197119995	197498888	2344	-0.174052	0.65102	0.825071	0.029768	hypo	0
chr3	114871483	115377761	2340	-0.209655	0.607767	0.817423	0.0365213	hypo	0
chr17	74789866	74987217	2681	-0.161439	0.621975	0.783414	0.031757	hypo	0
chr22	17852595	18066242	2591	-0.161993	0.706835	0.868828	0.0306787	hypo	0
chr3	171196796	171528799	2255	-0.190114	0.654251	0.844365	0.0316891	hypo	0
chr2	159830414	160088046	2220	-0.181774	0.670501	0.852276	0.029541	hypo	0
chr4	100022814	100473679	1915	-0.214234	0.612318	0.826552	0.0304756	hypo	0
chr10	125919495	126098008	2135	-0.18579	0.622944	0.808734	0.0297167	hypo	0
chr9	96437977	96707335	2119	-0.2051	0.57962	0.78472	0.0329178	hypo	0
chr20	1878646	2081907	1947	-0.203882	0.595283	0.799165	0.0298642	hypo	0
chr1	202999512	203235304	2103	-0.208591	0.55361	0.762201	0.0326859	hypo	0
chr6	25542182	25958338	2572	-0.1724	0.683572	0.855972	0.0338276	hypo	0
chr18	277076	498061	2041	-0.207064	0.605731	0.812795	0.0316026	hypo	0
chr1	110952287	111180515	2020	-0.208161	0.547817	0.755978	0.0314324	hypo	0
chr18	5630889	5887777	1560	-0.267076	0.536891	0.803968	0.0310109	hypo	0
chr4	78085596	78434796	1724	-0.231769	0.587528	0.819297	0.0296007	hypo	0
chr11	94289237	94692077	2652	-0.200708	0.615806	0.816514	0.0409087	hypo	0
chr11	66634338	66875524	3228	-0.131361	0.671868	0.803229	0.0318324	hypo	0
chr4	164092879	164410755	1842	-0.216209	0.566323	0.782532	0.0300078	hypo	0
chr3	125807397	126072919	2322	-0.201277	0.573278	0.774555	0.0356072	hypo	0
chr2	202648720	202895552	2235	-0.177431	0.64428	0.82171	0.0297088	hypo	0
chr10	126679940	126838030	2491	-0.155603	0.693255	0.848858	0.0287614	hypo	0
chr11	58355176	58853932	2527	-0.166832	0.629303	0.796135	0.0314395	hypo	0
chr8	1774135	1920872	2486	-0.168946	0.677852	0.846798	0.0314841	hypo	0
chrX	45712913	46308681	2911	-0.209564	0.599718	0.809282	0.0457162	hypo	0
chr6	3756505	3996873	2538	-0.164267	0.692796	0.857063	0.0312291	hypo	0
chr2	241767465	241937756	2099	-0.191004	0.587287	0.778291	0.0304439	hypo	0
chr16	19135256	19418116	2429	-0.171819	0.630741	0.802561	0.0313289	hypo	0
chr14	104393307	104600166	2227	-0.177283	0.628532	0.805815	0.0296827	hypo	0
chr17	65393809	65711681	3663	-0.121922	0.771303	0.893225	0.0333759	hypo	0
chr18	18829077	19086479	2053	-0.19765	0.667844	0.865493	0.0303877	hypo	0
chr15	68874763	69070937	1960	-0.202905	0.59661	0.799515	0.0300206	hypo	0
chr2	19225305	19540812	1609	-0.252016	0.589892	0.841908	0.0305932	hypo	0
chr19	8950351	9242289	2846	-0.182625	0.615843	0.798468	0.0392175	hypo	0
chr7	126533828	126889015	1492	-0.276127	0.508953	0.78508	0.0315771	hypo	0
chr9	124259619	124460968	2313	-0.178718	0.564353	0.743071	0.0321148	hypo	0
chr12	10026857	10363533	2493	-0.156721	0.640416	0.797138	0.0294109	hypo	0
chr11	100560824	100992525	2427	-0.186045	0.669739	0.855784	0.0346741	hypo	0
chr2	9778102	9980851	2547	-0.152727	0.659798	0.812524	0.029352	hypo	0
chr2	234471390	234743771	1966	-0.199197	0.627651	0.826848	0.0294472	hypo	0
chr4	156302140	156587655	1699	-0.226634	0.59274	0.819374	0.0292754	hypo	0
chr11	72150685	72381853	2055	-0.200328	0.563417	0.763745	0.0310698	hypo	0
chr21	44077708	44253887	2498	-0.154133	0.651888	0.806021	0.0289946	hypo	0
chr7	95953934	96301716	1713	-0.23005	0.615414	0.845464	0.0296672	hypo	0
chr1	230830858	231038471	2181	-0.191313	0.65407	0.845383	0.0318698	hypo	0
chr15	73091925	73338509	1837	-0.224426	0.569244	0.793671	0.0314904	hypo	0
chr3	53530097	53778874	2251	-0.18818	0.663857	0.852038	0.0322833	hypo	0
chr14	81691682	81942802	2035	-0.19596	0.612508	0.808468	0.0304144	hypo	0
chr12	94150105	94496055	2302	-0.182411	0.637406	0.819817	0.0317669	hypo	0
chr14	57882034	58331189	2149	-0.216853	0.581909	0.798762	0.0356641	hypo	0
chr1	219414650	219769693	1907	-0.22348	0.619233	0.842713	0.0321367	hypo	0
chr13	49150610	49547260	2193	-0.180339	0.656766	0.837105	0.0304054	hypo	0
chrX	95319693	95939705	2607	-0.229948	0.570479	0.800427	0.0453386	hypo	0
chr2	135210686	135464420	2183	-0.178264	0.714341	0.892605	0.0295608	hypo	0
chr10	119803242	120058575	1834	-0.209236	0.58641	0.795646	0.0294223	hypo	0
chr16	20935355	21167066	2281	-0.180477	0.705385	0.885862	0.0315737	hypo	0
chr1	66903915	67210097	1722	-0.239477	0.56893	0.808407	0.0315403	hypo	0
chr15	83884848	84113398	1915	-0.208381	0.556537	0.764918	0.0311922	hypo	0
chr6	43742274	43965578	2110	-0.195059	0.639383	0.834442	0.031567	hypo	0
chr4	1478710	1678562	2926	-0.129861	0.684218	0.814079	0.0292619	hypo	0
chr11	31850034	32107324	1865	-0.216063	0.592082	0.808145	0.0310863	hypo	0
chr21	10698079	10975052	2225	-0.199354	0.471172	0.670526	0.0343988	hypo	0
chr1	11355649	11538384	2266	-0.176282	0.60619	0.782472	0.030711	hypo	0
chr4	8637032	8798927	2257	-0.171276	0.625018	0.796294	0.0301229	hypo	0
chr7	116168906	116500914	2068	-0.19806	0.637427	0.835487	0.0323478	hypo	0
chr2	54956913	55189546	1862	-0.209964	0.691427	0.90139	0.0301029	hypo	0
chr5	55781546	56107908	2205	-0.186629	0.66544	0.85207	0.0320169	hypo	0
chr22	31091895	31311197	2381	-0.177994	0.660973	0.838967	0.0328466	hypo	0
chr17	699949	876670	3021	-0.133873	0.701363	0.835237	0.0312225	hypo	0
chr2	70783603	71013596	1831	-0.22008	0.583651	0.803731	0.0318555	hypo	0
chr6	136612269	136872730	2017	-0.209358	0.639341	0.848699	0.034481	hypo	0
chr11	68863603	69066071	2415	-0.164897	0.662523	0.82742	0.0307796	hypo	0
chr15	81299619	81604544	2294	-0.170909	0.60855	0.779459	0.0312086	hypo	0
chr19	22039756	22560075	2395	-0.218887	0.599169	0.818057	0.0410861	hypo	0
chrX	107399906	107966030	2400	-0.245269	0.498342	0.743612	0.0458485	hypo	0
chr13	25546703	25812958	2305	-0.167636	0.610429	0.778065	0.0302558	hypo	0
chr10	17276397	17490918	1762	-0.219535	0.612766	0.8323	0.0308193	hypo	0
chr5	87602669	87954174	1738	-0.225602	0.607636	0.833238	0.0306566	hypo	0
chr16	1037160	1276286	3550	-0.113646	0.636381	0.750027	0.0315105	hypo	0
chr20	43731360	43988696	2017	-0.184924	0.568591	0.753515	0.0299494	hypo	0
chr21	42544312	42748365	2197	-0.186708	0.642793	0.829501	0.0329536	hypo	0
chr16	71202550	71473540	2218	-0.183969	0.565069	0.749038	0.0323406	hypo	0
chr3	46602166	46884688	2312	-0.177553	0.625065	0.802618	0.0325969	hypo	0
chr1	120262111	120537762	1797	-0.223737	0.647349	0.871086	0.0316699	hypo	0
chr20	46294541	46453347	1982	-0.182156	0.633941	0.816097	0.0284992	hypo	0
chr20	42946358	43102742	1808	-0.204901	0.619004	0.823905	0.0297765	hypo	0
chr15	69458974	69711404	1939	-0.193911	0.636281	0.830192	0.0295127	hypo	0
chr4	26442191	26813155	2160	-0.17089	0.692056	0.862946	0.0289912	hypo	0
chr3	126198800	126419875	1974	-0.215138	0.563917	0.779055	0.0350161	hypo	0
chr2	208035918	208365384	2142	-0.172496	0.665424	0.83792	0.029185	hypo	0
chr12	116720133	116944196	2582	-0.14736	0.705161	0.852521	0.0300274	hypo	0
chr7	134367087	134689662	2432	-0.154699	0.687025	0.841725	0.0296884	hypo	0
chr9	97227415	97483670	2421	-0.158626	0.675667	0.834293	0.0307031	hypo	0
chr6	6012831	6409575	2458	-0.172886	0.645403	0.818288	0.0335651	hypo	0
chr14	65174031	65382007	1994	-0.193751	0.60184	0.795591	0.0309561	hypo	0
chr6	155321494	155564496	2723	-0.145359	0.722126	0.867485	0.0313972	hypo	0
chr1	92005622	92344381	2679	-0.146756	0.695635	0.842391	0.0311869	hypo	0
chr3	122997037	123162447	1897	-0.205637	0.615993	0.821629	0.0310253	hypo	0
chrX	14055925	14695174	2689	-0.217144	0.522919	0.740063	0.046875	hypo	0
chr6	110134132	110484292	2197	-0.181336	0.654189	0.835525	0.0318908	hypo	0
chr22	35847531	36046164	2345	-0.164057	0.623473	0.78753	0.0308367	hypo	0
chr12	95911666	96181216	2227	-0.174482	0.646505	0.820987	0.0317796	hypo	0
chr11	73960226	74296334	2315	-0.17436	0.648222	0.822582	0.0327589	hypo	0
chr9	116922840	117101295	2004	-0.223648	0.612727	0.836375	0.0368608	hypo	0
chr20	34947126	35119992	1940	-0.187754	0.605229	0.792983	0.0291207	hypo	0
chr1	77691626	78023604	2077	-0.186598	0.618297	0.804895	0.0310328	hypo	0
chr8	143539876	143735514	2192	-0.182488	0.597205	0.779693	0.0325934	hypo	0
chr8	10703340	10872515	1826	-0.218018	0.579069	0.797087	0.0323507	hypo	0
chr9	73035781	73316749	2032	-0.182553	0.66248	0.845032	0.0297582	hypo	0
chr6	17714070	17980838	2280	-0.169341	0.72482	0.89416	0.0310161	hypo	0
chr2	12459951	12856242	2563	-0.141521	0.719524	0.861045	0.0291066	hypo	0
chr19	51610538	51847053	2343	-0.202855	0.54921	0.752065	0.0381465	hypo	0
chr11	13035654	13286336	1669	-0.237444	0.561683	0.799127	0.0326581	hypo	0
chr22	44733591	44890928	2019	-0.191335	0.630692	0.822027	0.0312952	hypo	0
chr6	52547326	52857624	1683	-0.230171	0.600136	0.830307	0.0314242	hypo	0
chrX	107984262	108848883	2827	-0.201333	0.531902	0.733235	0.0458985	hypo	0
chr16	57844347	58014898	1934	-0.200668	0.607456	0.808124	0.031707	hypo	0
chr5	55427959	55775382	2381	-0.160403	0.700133	0.860537	0.0308945	hypo	0
chr2	75429088	75875210	2488	-0.157391	0.643303	0.800693	0.0335502	hypo	0
chr3	44067688	44375270	2076	-0.186694	0.651352	0.838047	0.0313625	hypo	0
chr8	25910879	26172276	2141	-0.18206	0.605572	0.787632	0.0315385	hypo	0
chr3	140774491	141035122	2009	-0.198404	0.600664	0.799068	0.0328616	hypo	0
chr2	36832026	37064561	1892	-0.19475	0.653456	0.848206	0.0300808	hypo	0
chr18	45465003	45661619	1747	-0.212768	0.577547	0.790315	0.0306599	hypo	0
chr17	75687628	75871544	2373	-0.161798	0.652457	0.814255	0.031151	hypo	0
chr5	168731859	169013108	1490	-0.264369	0.512675	0.777044	0.0322613	hypo	0
chr6	17398308	17589516	1867	-0.207102	0.644351	0.851453	0.0316016	hypo	0
chr18	21203003	21443395	2142	-0.176495	0.649306	0.8258	0.031074	hypo	0
chrX	117876631	118376524	3170	-0.184517	0.591108	0.775625	0.04776	hypo	0
chr3	14241289	14442426	2112	-0.186194	0.632046	0.81824	0.0321019	hypo	0
chr14	61466593	61783920	2145	-0.180467	0.617341	0.797808	0.0317352	hypo	0
chr12	69329483	69625782	2021	-0.179659	0.677616	0.857275	0.0298019	hypo	0
chr8	102227861	102500879	2020	-0.194803	0.643017	0.837821	0.0326394	hypo	0
chr7	105327621	105512990	1693	-0.216043	0.650035	0.866078	0.0299094	hypo	0
chr5	72254004	72523220	1908	-0.198911	0.596195	0.795106	0.0316044	hypo	0
chr12	32557583	32826322	2281	-0.159228	0.70369	0.862918	0.0301006	hypo	0
chr7	54831452	55082289	1849	-0.198733	0.584774	0.783507	0.0301436	hypo	0
chr3	134289912	134511762	1508	-0.251149	0.545516	0.796665	0.0311377	hypo	0
chrX	130221707	130816340	2556	-0.218047	0.524494	0.742541	0.0460517	hypo	0
chr16	88116566	88389266	2870	-0.134617	0.701829	0.836446	0.0317875	hypo	0
chrX	44985413	45591808	2546	-0.216962	0.589027	0.805989	0.0455098	hypo	0
chr8	124557661	124775297	1786	-0.210626	0.627081	0.837706	0.0311465	hypo	0
chr21	35529076	35745568	1913	-0.184163	0.654968	0.839132	0.0292971	hypo	0
chr5	1113992	1289089	2801	-0.134752	0.658642	0.793395	0.0314425	hypo	0
chr1	22862984	23037137	2194	-0.173587	0.56175	0.735337	0.0316987	hypo	0
chr3	67053892	67416303	1803	-0.218659	0.612701	0.83136	0.0337289	hypo	0
chr22	19515340	19699430	2283	-0.172031	0.657672	0.829702	0.0343288	hypo	0
chr10	64581329	64885888	1979	-0.173047	0.68313	0.856177	0.0285167	hypo	0
chr10	105445310	105664095	2312	-0.152023	0.641186	0.793209	0.0300198	hypo	0
chr1	21811623	21995778	2321	-0.164612	0.567852	0.732464	0.0320358	hypo	0
chr1	183116075	183383264	2111	-0.18003	0.649938	0.829968	0.0319078	hypo	0
chr7	135353875	135601480	2110	-0.169809	0.693677	0.863487	0.0299487	hypo	0
chr8	59578572	60021962	2843	-0.131603	0.736942	0.868545	0.0312832	hypo	0
chr6	167795600	167942003	1754	-0.211986	0.615131	0.827117	0.0310862	hypo	0
chr17	35084064	35287349	2244	-0.165745	0.57572	0.741465	0.0310935	hypo	0
chr1	75227318	75589317	1370	-0.270686	0.534286	0.804972	0.0311404	hypo	0
chr1	147099959	147396752	1815	-0.214601	0.59462	0.809221	0.0326865	hypo	0
chr11	60234338	60612210	2597	-0.141947	0.684236	0.826183	0.0310632	hypo	0
chr12	114889856	115100154	1703	-0.211564	0.535032	0.746596	0.0304906	hypo	0
chr8	120891075	121134236	2050	-0.183893	0.661159	0.845052	0.0316738	hypo	0
chr5	80260117	80540551	2232	-0.168766	0.689143	0.857909	0.0315063	hypo	0
chr18	20140595	20503614	1926	-0.188202	0.637493	0.825695	0.0306391	hypo	0
chr10	28594621	28805222	1793	-0.191976	0.65256	0.844536	0.0292262	hypo	0
chr8	77597747	77869144	1614	-0.229369	0.594808	0.824176	0.0312571	hypo	0
chr9	509870	749913	2205	-0.16681	0.670619	0.83743	0.0313509	hypo	0
chr1	11542986	11703809	1906	-0.197989	0.561958	0.759947	0.0320289	hypo	0
chr3	32190099	32428483	2031	-0.18427	0.615949	0.800219	0.0317557	hypo	0
chr8	74968538	75223321	1796	-0.205857	0.635102	0.840958	0.0313096	hypo	0
chr3	61232189	61535918	1847	-0.213001	0.615397	0.828398	0.0335529	hypo	0
chr12	11342690	11760087	2157	-0.197064	0.631272	0.828336	0.03617	hypo	0
chr5	178773219	178941004	2055	-0.178112	0.641694	0.819806	0.0309951	hypo	0
chr2	73152263	73392863	2406	-0.14342	0.67801	0.82143	0.0293992	hypo	0
chr2	46530560	46757379	1923	-0.179252	0.638987	0.818239	0.0294778	hypo	0
chrX	40039419	40415493	3010	-0.177695	0.631911	0.809606	0.0454772	hypo	0
chr8	121142355	121404361	1512	-0.241417	0.603883	0.8453	0.031093	hypo	0
chr6	30889078	31114108	2292	-0.169066	0.630237	0.799303	0.0335726	hypo	0
chr17	75496912	75683552	2351	-0.156226	0.654212	0.810437	0.031434	hypo	0
chr9	117157157	117345201	1919	-0.189822	0.616044	0.805866	0.0317235	hypo	0
chr2	27073017	27240404	1702	-0.207092	0.611628	0.81872	0.0302727	hypo	0
chr7	96337050	96619889	1423	-0.258381	0.545002	0.803382	0.031772	hypo	0
chr9	132935818	133072994	1926	-0.184142	0.611083	0.795225	0.0305139	hypo	0
chr6	87525656	87861024	1544	-0.240514	0.570939	0.811453	0.0322426	hypo	0
chr11	70964364	71141459	1941	-0.188525	0.623487	0.812012	0.0317651	hypo	0
chr11	93549260	93853053	1635	-0.225873	0.5812	0.807074	0.0320685	hypo	0
chr6	167041555	167253427	2859	-0.127256	0.694529	0.821785	0.0314584	hypo	0
chr22	18286836	18463142	2514	-0.14503	0.758534	0.903564	0.0316181	hypo	0
chr8	101974805	102182801	2007	-0.184128	0.640377	0.824505	0.0318542	hypo	0
chr5	106730574	107002503	1815	-0.196205	0.653902	0.850107	0.0306942	hypo	0
chr2	45402155	45613016	1686	-0.199881	0.63367	0.833551	0.0290748	hypo	0
chrX	16896546	17391399	2627	-0.204065	0.584927	0.788991	0.0465949	hypo	0
chr9	34672583	34957254	1627	-0.214331	0.541892	0.756223	0.0304099	hypo	0
chr12	9110085	9435138	2042	-0.171591	0.684529	0.85612	0.0305044	hypo	0
chr19	22848922	23253403	2114	-0.213317	0.603099	0.816416	0.0389984	hypo	0
chr10	98078127	98268907	1862	-0.180402	0.630013	0.810415	0.029155	hypo	0
chr5	6384289	6591710	2194	-0.167496	0.643587	0.811084	0.0324941	hypo	0
chr1	43926391	44111718	2145	-0.167532	0.659005	0.826537	0.0312737	hypo	0
chr7	154800005	154982579	1803	-0.197634	0.593214	0.790848	0.0312625	hypo	0
chrX	74565100	75353562	2313	-0.236112	0.512454	0.748566	0.0474406	hypo	0
chr6	168042987	168219624	2606	-0.145239	0.647255	0.792493	0.0337298	hypo	0
chr7	106511741	106801022	2051	-0.171116	0.694826	0.865942	0.0310308	hypo	0
chr1	24521222	24736281	2329	-0.154099	0.677598	0.831697	0.031315	hypo	0
chr3	160477039	160813427	1682	-0.230834	0.638103	0.868937	0.0339802	hypo	0
chr16	22577627	22820637	1573	-0.227595	0.577804	0.805399	0.0311554	hypo	0
chr15	37180553	37387387	1472	-0.236794	0.584908	0.821703	0.030477	hypo	0
chrX	38184955	38640472	2449	-0.219219	0.557393	0.776613	0.0466944	hypo	0
chr8	142825558	142957928	1640	-0.220416	0.548042	0.768458	0.0315242	hypo	0
chr1	156895796	157092613	1697	-0.210727	0.602663	0.813389	0.0310975	hypo	0
chr2	207662534	207946632	1576	-0.21429	0.62736	0.84165	0.0293789	hypo	0
chr4	146105237	146398623	1505	-0.221421	0.636735	0.858156	0.0291471	hypo	0
chr21	34155038	34391254	1936	-0.178153	0.650924	0.829077	0.0302705	hypo	0
chr8	60879753	61192862	1688	-0.212363	0.65511	0.867473	0.0314877	hypo	0
chr9	14349686	14577586	1692	-0.206456	0.587042	0.793498	0.0304861	hypo	0
chr22	44900424	45066616	2067	-0.173979	0.603885	0.777864	0.0317606	hypo	0
chr1	214508244	214771989	2215	-0.181746	0.652104	0.83385	0.035954	hypo	0
chr4	77614059	77864733	1733	-0.196698	0.624105	0.820803	0.030432	hypo	0
chr14	51304590	51555520	2049	-0.171723	0.643647	0.81537	0.0318757	hypo	0
chr20	17663275	17865367	2108	-0.152173	0.685456	0.837628	0.0282152	hypo	0
chr18	12438727	12653998	1903	-0.177423	0.727352	0.904775	0.0297122	hypo	0
chr18	56430835	56653516	2571	-0.135265	0.721746	0.857012	0.0311036	hypo	0
chr13	52386736	52580720	1747	-0.206728	0.622728	0.829457	0.0334494	hypo	0
chr4	56416343	56721099	1788	-0.196886	0.600326	0.797213	0.0317771	hypo	0
chr13	111572374	111818659	2144	-0.158394	0.628025	0.786418	0.0300009	hypo	0
chr1	217316513	217607187	1602	-0.225022	0.597954	0.822976	0.0318597	hypo	0
chrX	2852366	3258783	2222	-0.231599	0.57945	0.811049	0.0453909	hypo	0
chr13	43168661	43460200	1746	-0.188717	0.668417	0.857133	0.0290839	hypo	0
chr20	21505230	21680165	1403	-0.229262	0.533404	0.762666	0.0285753	hypo	0
chr1	93846959	94145014	2180	-0.16323	0.708139	0.871369	0.0320765	hypo	0
chr8	104091128	104380717	1829	-0.196351	0.596734	0.793085	0.0325608	hypo	0
chr15	70772236	71050272	2089	-0.164002	0.606867	0.770869	0.0309226	hypo	0
chr6	154836981	155048172	1959	-0.177709	0.691914	0.869623	0.0309183	hypo	0
chr18	19757219	19928299	1584	-0.219922	0.567118	0.78704	0.031156	hypo	0
chr16	49897081	50055322	1552	-0.225412	0.608879	0.834291	0.0313656	hypo	0
chr10	11795921	11957914	2376	-0.134001	0.72544	0.859441	0.0283442	hypo	0
chr12	100737413	100964045	1588	-0.214321	0.630586	0.844907	0.0305782	hypo	0
chr16	56231288	56388177	1509	-0.233512	0.584563	0.818075	0.031669	hypo	0
chr3	170602219	171026086	2558	-0.136638	0.720574	0.857212	0.031204	hypo	0
chr6	149081967	149389689	2578	-0.135591	0.729089	0.86468	0.0313271	hypo	0
chr21	47404303	47599455	2298	-0.14669	0.685502	0.832192	0.0303824	hypo	0
chr18	19931103	20139049	1376	-0.253135	0.550359	0.803494	0.0315981	hypo	0
chrX	7264906	7623828	1920	-0.263515	0.566957	0.830472	0.0453386	hypo	0
chr17	2757914	2901708	2126	-0.162592	0.709844	0.872436	0.0310421	hypo	0
chr9	37903827	38064150	1878	-0.183956	0.643533	0.82749	0.0311353	hypo	0
chr6	132036880	132268964	1481	-0.243061	0.599938	0.842999	0.0332909	hypo	0
chr3	56836113	57103240	2232	-0.160873	0.666101	0.826974	0.0324828	hypo	0
chr10	50387987	50599522	1704	-0.187446	0.614926	0.802372	0.0287274	hypo	0
chr22	44212766	44351139	1818	-0.189137	0.565261	0.754398	0.0308972	hypo	0
chr16	15491308	15682637	2036	-0.169213	0.701401	0.870614	0.0311285	hypo	0
chr3	53928200	54153301	1540	-0.231639	0.566576	0.798216	0.0323477	hypo	0
chr7	140182101	140337869	1941	-0.170143	0.6869	0.857043	0.0299632	hypo	0
chr6	13822686	14068867	1911	-0.182854	0.645339	0.828192	0.0319634	hypo	0
chr17	79009388	79167539	2515	-0.139708	0.697184	0.836893	0.031785	hypo	0
chr12	103895738	104155501	1787	-0.183901	0.643259	0.82716	0.0298282	hypo	0
chr3	9008307	9214614	1861	-0.183686	0.65397	0.837656	0.0309591	hypo	0
chr13	33784655	34087594	1966	-0.167062	0.68726	0.854322	0.030089	hypo	0
chr3	185353519	185535888	1697	-0.201468	0.64606	0.847528	0.0309932	hypo	0
chr22	40061918	40346397	2555	-0.132009	0.69291	0.824919	0.0305127	hypo	0
chr12	66225841	66515485	1970	-0.18708	0.605695	0.792775	0.0334432	hypo	0
chr7	132261610	132462214	1588	-0.211065	0.617924	0.828989	0.0305242	hypo	0
chr12	117630038	117796023	1832	-0.189548	0.609841	0.799389	0.0324317	hypo	0
chr3	27530843	27754830	1770	-0.1962	0.658729	0.854929	0.0317841	hypo	0
chr10	27837202	28028206	1395	-0.224409	0.619774	0.844183	0.0284629	hypo	0
chr8	8259920	8553814	2742	-0.126994	0.753276	0.88027	0.0316659	hypo	0
chr8	24814579	25036206	1649	-0.218833	0.529789	0.748622	0.0336172	hypo	0
chr2	217384973	217550886	1687	-0.190762	0.595478	0.78624	0.0295347	hypo	0
chr22	32363825	32593838	1700	-0.205419	0.592784	0.798203	0.0328016	hypo	0
chr1	236767362	236955051	1927	-0.177036	0.64851	0.825546	0.0311822	hypo	0
chr2	10595	256680	1679	-0.193059	0.60621	0.799269	0.0298594	hypo	0
chr7	16465671	16680565	1479	-0.239151	0.616426	0.855577	0.0330943	hypo	0
chr11	117886465	118081770	1942	-0.17628	0.630314	0.806594	0.0316072	hypo	0
chr3	12334455	12522688	1589	-0.216385	0.641985	0.85837	0.0320458	hypo	0
chr7	98745392	98920600	1969	-0.164603	0.70335	0.867953	0.0298233	hypo	0
chr10	64001582	64288334	1642	-0.191557	0.606405	0.797962	0.0291619	hypo	0
chr1	10860465	11055665	2692	-0.129649	0.635238	0.764886	0.0322971	hypo	0
chr1	67906841	68143727	1835	-0.193171	0.641304	0.834476	0.0332544	hypo	0
chr11	76386672	76564758	1707	-0.198596	0.584349	0.782945	0.0314952	hypo	0
chr5	110464714	110819840	1853	-0.184101	0.639755	0.823856	0.0315025	hypo	0
chr2	153196492	153500481	2280	-0.154254	0.70595	0.860204	0.0327075	hypo	0
chr20	57093627	57219991	1644	-0.192518	0.608594	0.801112	0.0294471	hypo	0
chr10	23742983	23978022	1364	-0.235223	0.590037	0.82526	0.0301455	hypo	0
chr5	126566079	126845829	1654	-0.201303	0.629894	0.831198	0.0313502	hypo	0
chr12	109597365	109743710	1814	-0.185014	0.707516	0.892529	0.0316816	hypo	0
chr1	203865351	204042912	1526	-0.216104	0.629954	0.846058	0.0305902	hypo	0
chr15	34881622	35142646	1689	-0.20549	0.584552	0.790042	0.0323993	hypo	0
chr2	109955553	110109221	1965	-0.174235	0.663519	0.837754	0.0320792	hypo	0
chr22	32904362	33050763	1667	-0.200009	0.644086	0.844095	0.0310946	hypo	0
chr5	122434444	122682334	1539	-0.220691	0.599279	0.819969	0.0321641	hypo	0
chr10	123358317	123497478	1578	-0.192657	0.599875	0.792533	0.0284758	hypo	0
chr13	113623755	113758817	2163	-0.145827	0.707919	0.853746	0.0295085	hypo	0
chr21	46534562	46676808	1625	-0.193848	0.62488	0.818728	0.0297835	hypo	0
chr3	14533057	14688345	1754	-0.195175	0.572142	0.767317	0.0325239	hypo	0
chr5	169513463	169695526	1449	-0.224756	0.620503	0.845258	0.0305156	hypo	0
chr9	111889232	112077957	1810	-0.182522	0.648028	0.830551	0.0309786	hypo	0
chr14	91979239	92280824	1818	-0.178367	0.667696	0.846063	0.0309037	hypo	0
chr12	96958953	97297001	1798	-0.175208	0.658702	0.83391	0.0296159	hypo	0
chr7	24333190	24622135	1876	-0.186779	0.630361	0.81714	0.034128	hypo	0
chr2	20255345	20439475	1929	-0.164656	0.633387	0.798043	0.0300391	hypo	0
chr2	183653344	183980356	2006	-0.16216	0.668287	0.830448	0.0311238	hypo	0
chr10	113945069	114136132	1507	-0.204098	0.616322	0.82042	0.0290257	hypo	0
chr11	27748895	28028228	1441	-0.230921	0.572845	0.803766	0.0315142	hypo	0
chr7	143599055	143883804	1544	-0.233768	0.613122	0.846891	0.0348522	hypo	0
chr18	11692524	11846551	1624	-0.200366	0.614304	0.81467	0.0311331	hypo	0
chr11	62109548	62309107	2352	-0.141741	0.673074	0.814815	0.0317317	hypo	0
chr15	84125449	84318165	1381	-0.239785	0.607616	0.847401	0.0328139	hypo	0
chr1	85168607	85402426	1809	-0.181125	0.653177	0.834302	0.0310649	hypo	0
chr14	90532284	90720609	1569	-0.201094	0.608704	0.809798	0.0302902	hypo	0
chr15	48651008	48933652	1903	-0.174874	0.708848	0.883721	0.0325714	hypo	0
chr11	58954379	59310016	2055	-0.161248	0.645256	0.806505	0.0318058	hypo	0
chr14	94256930	94404513	1512	-0.20587	0.586053	0.791923	0.0296434	hypo	0
chr1	230411057	230556947	1745	-0.184733	0.622986	0.807719	0.0305907	hypo	0
chr5	110077206	110412889	1503	-0.220276	0.559523	0.779799	0.0314881	hypo	0
chr1	220451377	220698617	1540	-0.221228	0.601497	0.822726	0.0323905	hypo	0
chr17	59539198	59750482	1773	-0.191205	0.646774	0.837979	0.0322231	hypo	0
chr5	141492509	141693636	1979	-0.169219	0.674421	0.843639	0.032164	hypo	0
chr5	75026623	75377224	1615	-0.206918	0.625663	0.83258	0.0321728	hypo	0
chrX	106454849	106871032	2171	-0.222054	0.532991	0.755044	0.0459989	hypo	0
chr20	48811745	48963524	1962	-0.151603	0.655466	0.807068	0.0285254	hypo	0
chr16	50406596	50577474	1468	-0.225499	0.58406	0.80956	0.0318254	hypo	0
chr4	8235216	8370739	1887	-0.165906	0.634937	0.800843	0.0298025	hypo	0
chr7	105522787	105696628	1456	-0.219288	0.606364	0.825652	0.0313882	hypo	0
chr5	126898088	127276266	2084	-0.172514	0.679283	0.851797	0.0337969	hypo	0
chr20	56057331	56194383	1773	-0.167657	0.589529	0.757186	0.0284163	hypo	0
chr17	17216358	17384884	2010	-0.16152	0.666692	0.828212	0.0310518	hypo	0
chr7	133655329	133974618	2089	-0.14988	0.73369	0.88357	0.0300647	hypo	0
chr9	132428923	132561065	2022	-0.155223	0.610772	0.765995	0.0301556	hypo	0
chr6	71669560	71996914	1495	-0.225937	0.588412	0.81435	0.0330977	hypo	0
chr7	4856186	5005585	2133	-0.148779	0.667929	0.816708	0.0308388	hypo	0
chr2	159520662	159721859	1458	-0.207999	0.647936	0.855936	0.0290851	hypo	0
chr11	1599669	1775499	2159	-0.149682	0.609784	0.759466	0.0311648	hypo	0
chr10	50186415	50377046	1441	-0.204572	0.632731	0.837304	0.0283381	hypo	0
chr7	45617099	45764861	1373	-0.235198	0.615387	0.850585	0.0314014	hypo	0
chr3	133541489	133738873	1699	-0.202353	0.593786	0.796139	0.0342764	hypo	0
chr16	54144389	54313558	1728	-0.188407	0.643707	0.832114	0.0314142	hypo	0
chr14	74771221	74954132	1691	-0.181943	0.653739	0.835682	0.029799	hypo	0
chr20	49207387	49347212	1760	-0.169542	0.649179	0.818721	0.0295365	hypo	0
chr20	4001791	4203087	2037	-0.14839	0.620731	0.769122	0.0299201	hypo	0
chr8	72475846	72742028	1335	-0.245988	0.540562	0.78655	0.0323792	hypo	0
chr17	56169164	56397312	1980	-0.164978	0.634522	0.7995	0.031751	hypo	0
chr10	50824842	51022871	1820	-0.182615	0.563765	0.74638	0.0324545	hypo	0
chr6	137539644	137807623	1919	-0.168911	0.644582	0.813493	0.0316457	hypo	0
chr1	166949790	167183579	1752	-0.186582	0.607822	0.794404	0.0319321	hypo	0
chr20	5300585	5505450	1319	-0.232395	0.563184	0.795579	0.0307596	hypo	0
chr4	2267024	2411187	2057	-0.147387	0.678376	0.825763	0.0296815	hypo	0
chr15	42268570	42449878	1984	-0.151813	0.662807	0.81462	0.0292485	hypo	0
chr18	71965296	72160663	1850	-0.172091	0.62752	0.799612	0.0314456	hypo	0
chr13	27849819	27996673	1580	-0.194065	0.630778	0.824843	0.0302224	hypo	0
chr2	208895002	209100488	1796	-0.168354	0.6567	0.825054	0.0294957	hypo	0
chr12	132823363	132997027	2689	-0.114033	0.671098	0.785131	0.0302956	hypo	0
chr1	85749807	86039298	1660	-0.194476	0.621814	0.81629	0.0314369	hypo	0
chr5	927334	1103325	2531	-0.125538	0.665998	0.791536	0.0312591	hypo	0
chr15	63580643	63790704	2172	-0.139734	0.695183	0.834917	0.0299984	hypo	0
chr7	8199202	8471963	1641	-0.192082	0.624861	0.816943	0.0306969	hypo	0
chr1	146775226	147069094	1588	-0.204158	0.610135	0.814293	0.0319146	hypo	0
chr17	54678657	54859624	1534	-0.222985	0.585808	0.808793	0.0340788	hypo	0
chr8	30052224	30239900	1647	-0.192167	0.677885	0.870052	0.0310448	hypo	0
chr9	88648644	88871431	1837	-0.171437	0.684467	0.855904	0.0315279	hypo	0
chr2	60791776	60975385	1744	-0.180908	0.657702	0.83861	0.0308372	hypo	0
chr21	43675224	43874625	2821	-0.108378	0.70454	0.812918	0.0300958	hypo	0
chr1	86863100	87161237	1491	-0.220214	0.629853	0.850067	0.0326988	hypo	0
chr5	1642875	1794157	1973	-0.158161	0.614941	0.773102	0.0307622	hypo	0
chr2	201453135	201672370	1578	-0.190407	0.634141	0.824548	0.0299245	hypo	0
chr22	32602722	32778940	1548	-0.200727	0.630166	0.830893	0.0307772	hypo	0
chr15	39875482	40065154	1313	-0.232442	0.625873	0.858315	0.0300575	hypo	0
chr10	45500581	45849976	1592	-0.194359	0.636614	0.830973	0.0311982	hypo	0
chr15	35281693	35669389	2451	-0.12427	0.757353	0.881623	0.0300108	hypo	0
chr2	150187737	150419026	1257	-0.254112	0.578844	0.832956	0.0317558	hypo	0
chr15	56038230	56278898	1818	-0.173562	0.685713	0.859275	0.0311218	hypo	0
chr6	41073435	41334779	1676	-0.189904	0.627832	0.817736	0.0316444	hypo	0
chr20	61667059	61803065	2193	-0.138752	0.596937	0.735689	0.0309179	hypo	0
chr11	18817451	19134696	1447	-0.239256	0.542126	0.781382	0.0352653	hypo	0
chr5	71852978	72105467	1378	-0.230332	0.623025	0.853357	0.0320966	hypo	0
chr4	183844939	184016330	1398	-0.210284	0.632355	0.84264	0.0293108	hypo	0
chr1	101012153	101347878	1465	-0.218044	0.603893	0.821937	0.031788	hypo	0
chr9	127180537	127398300	2227	-0.134814	0.699439	0.834253	0.029794	hypo	0
chr1	230564793	230773961	1305	-0.241844	0.558821	0.800665	0.0315634	hypo	0
chr10	96533881	96970192	1275	-0.239744	0.582354	0.822098	0.0306931	hypo	0
[truncated: 8,566 more rows]

## Sheet: Activation
chr	start	end	n	meanDiff	group1.mean	group2.mean	tstat.sd	direction	fwer
chr6	90749142	90810288	416	-0.112115	0.756518	0.868633	0.0225288	hypo	1
chr7	22690692	22785356	649	-0.0707243	0.742244	0.812968	0.0232366	hypo	2
chr1	160555804	160642715	537	-0.0797174	0.68937	0.769088	0.0269644	hypo	2
chr6	26015394	26043626	567	-0.0721137	0.378277	0.450391	0.0254712	hypo	8
chr15	80251702	80291586	476	-0.0799579	0.734263	0.814221	0.0241677	hypo	5
chr2	89123653	89188491	387	-0.104438	0.543267	0.647705	0.0269417	hypo	1
chr3	119264803	119309177	389	-0.103279	0.64294	0.746218	0.0272942	hypo	4
chr9	132772665	132808250	399	-0.0951081	0.546724	0.641832	0.0279451	hypo	7
chr3	121778711	121828662	333	-0.0995719	0.673253	0.772825	0.0244667	hypo	1
chr4	57366692	57405376	413	-0.0741539	0.697159	0.771313	0.0230322	hypo	6
chr20	30442157	30468569	302	-0.109965	0.527522	0.637487	0.0260342	hypo	6
chr8	27215484	27266566	433	-0.068837	0.627063	0.6959	0.0239036	hypo	4
chr15	65156028	65190831	376	-0.071736	0.718122	0.789858	0.0216918	hypo	8
chr7	99088458	99103686	318	-0.0946041	0.476526	0.57113	0.0248496	hypo	9
chr18	46443528	46467294	359	-0.0692998	0.677293	0.746592	0.0212272	hypo	9
chr5	150450001	150479584	347	-0.0987399	0.548297	0.647037	0.0294221	hypo	8
chr18	60813926	60837464	286	-0.0996879	0.625859	0.725547	0.0240961	hypo	8
chr7	5582350	5605740	442	-0.066653	0.519621	0.586273	0.025459	hypo	9
chr2	97529773	97548173	262	-0.122798	0.530647	0.653445	0.0277951	hypo	8
chr17	22019332	22036350	205	-0.20076	0.260976	0.461736	0.0371957	hypo	2
chr1	28190952	28208952	314	-0.0888687	0.561062	0.649931	0.0246687	hypo	9
chr7	756595	775491	272	-0.0944126	0.743308	0.83772	0.0226051	hypo	9
chr13	99942701	99973880	262	-0.112742	0.676049	0.78879	0.0254509	hypo	5
chr19	7750016	7773511	331	-0.125535	0.568769	0.694304	0.0372069	hypo	4
chr12	48339668	48365146	319	-0.0863938	0.641127	0.727521	0.0245842	hypo	9
chr13	77543946	77576247	365	-0.0599059	0.667035	0.726941	0.0197315	hypo	8
chr9	132420504	132438078	272	-0.0926093	0.678719	0.771329	0.0228817	hypo	9
chr21	45568236	45590412	374	-0.0669276	0.498268	0.565195	0.0228444	hypo	9
chr10	134747318	134768926	316	-0.0771372	0.666481	0.743618	0.0221653	hypo	9
chr3	57533810	57548522	241	-0.0977752	0.547128	0.644903	0.021717	hypo	9
chr7	66196965	66215097	274	-0.0937355	0.606003	0.699738	0.0243419	hypo	9
chr4	147074588	147104164	225	-0.0933872	0.686766	0.780154	0.0198328	hypo	8
chr17	8822200	8861566	369	-0.0781218	0.73947	0.817592	0.0272971	hypo	6
chr2	9761263	9783425	295	-0.079408	0.64579	0.725198	0.0220453	hypo	9
chr14	95761500	95794128	379	-0.0827615	0.705961	0.788722	0.0300882	hypo	8
chr4	2928843	2943401	304	-0.0690791	0.59577	0.664849	0.0199865	hypo	9
chr12	92844707	92903666	374	-0.0671196	0.688038	0.755157	0.0242467	hypo	5
chr7	150703293	150722510	306	-0.0813878	0.479721	0.561109	0.024282	hypo	9
chr14	89480374	89501692	238	-0.0993538	0.654706	0.75406	0.0231165	hypo	9
chr11	117796033	117824525	288	-0.0926379	0.738082	0.83072	0.0263432	hypo	8
chr8	28193794	28215393	318	-0.0834306	0.680611	0.764042	0.0255245	hypo	9
chr21	34629559	34646200	217	-0.115163	0.637279	0.752441	0.0244523	hypo	9
chr7	134845437	134879659	388	-0.0619151	0.69229	0.754205	0.0235103	hypo	8
chr10	70578783	70596363	246	-0.107419	0.670127	0.777545	0.0253352	hypo	9
chr11	118977879	119002692	366	-0.0904026	0.617104	0.707507	0.0330583	hypo	9
chr5	111071265	111110397	294	-0.0744855	0.671853	0.746338	0.0216101	hypo	6
chr7	102979249	102996550	227	-0.100949	0.458185	0.559135	0.0229092	hypo	9
chr12	121966412	121981716	181	-0.129035	0.475421	0.604456	0.0234172	hypo	9
chr9	126087993	126114598	373	-0.0800425	0.594218	0.67426	0.0298064	hypo	9
chr15	34620435	34641591	290	-0.0819993	0.475803	0.557802	0.0239874	hypo	9
chr3	33828193	33847989	225	-0.114024	0.601212	0.715236	0.0255707	hypo	9
chr4	140214329	140226934	217	-0.0995404	0.417477	0.517018	0.0220211	hypo	9
chr2	68860491	68885888	232	-0.0914957	0.685922	0.777418	0.0214352	hypo	9
chr8	142093713	142117515	396	-0.0674001	0.645206	0.712606	0.0277174	hypo	9
chr5	10551132	10572296	295	-0.085752	0.518814	0.604566	0.0261583	hypo	9
chr8	141103494	141118413	293	-0.0726878	0.691847	0.764535	0.0217581	hypo	9
chr12	52613685	52637522	221	-0.100902	0.652806	0.753708	0.0228676	hypo	8
chr13	99153826	99181554	380	-0.0504497	0.77675	0.8272	0.0196768	hypo	9
chr16	30585543	30602008	254	-0.13256	0.638055	0.770615	0.035275	hypo	9
chr11	68599687	68612870	330	-0.0832591	0.333329	0.416588	0.028606	hypo	9
chr14	103363039	103381808	372	-0.0657496	0.734883	0.800632	0.0255705	hypo	9
chr13	42958435	42999181	250	-0.0760422	0.795467	0.871509	0.0196768	hypo	6
chr3	16544264	16569289	216	-0.114165	0.411185	0.525351	0.0254411	hypo	7
chr1	247516214	247544762	330	-0.0690768	0.753735	0.822812	0.0236572	hypo	8
chr16	57372003	57402586	292	-0.0859356	0.711319	0.797254	0.0260109	hypo	8
chr3	13680662	13700665	317	-0.101874	0.617636	0.71951	0.0332338	hypo	9
chr16	11269129	11294180	344	-0.0776008	0.801351	0.878952	0.0278134	hypo	9
chr13	33105476	33123653	186	-0.107536	0.605801	0.713337	0.0213038	hypo	9
chr9	133545402	133572313	380	-0.0712862	0.593296	0.664583	0.0287236	hypo	9
chr21	40131833	40162526	299	-0.0665979	0.679254	0.745852	0.0210946	hypo	8
chr9	136682122	136699700	244	-0.0876711	0.773878	0.861549	0.0226866	hypo	9
chr3	66600653	66644162	357	-0.0558122	0.813776	0.869588	0.0214414	hypo	7
chr1	226065325	226080119	229	-0.099614	0.504172	0.603786	0.0248947	hypo	9
chr15	44997513	45023184	307	-0.0758105	0.415387	0.491198	0.0253293	hypo	9
chr13	113612362	113629468	273	-0.0675939	0.709525	0.777119	0.0201974	hypo	9
chr9	139692111	139711679	339	-0.0822832	0.545858	0.628141	0.0310644	hypo	9
chr6	37513468	37531878	232	-0.0992686	0.588508	0.687776	0.0262188	hypo	9
chr12	112981413	113023497	384	-0.0538017	0.800756	0.854558	0.0228451	hypo	8
chr12	111048589	111065880	231	-0.0923423	0.607457	0.6998	0.0238778	hypo	9
chr21	27533217	27550793	214	-0.104736	0.48809	0.592826	0.0249362	hypo	9
chr3	4501834	4527436	242	-0.0884628	0.690842	0.779305	0.0236502	hypo	9
chr11	58935927	58958248	224	-0.13376	0.637892	0.771652	0.0336601	hypo	6
chr1	112129317	112165742	265	-0.0863967	0.64228	0.728676	0.0254535	hypo	6
chr7	143546	158086	212	0.0932555	0.723647	0.630391	0.0225081	hyper	9
chr6	138181217	138199405	196	-0.130864	0.384796	0.51566	0.0290448	hypo	7
chr15	75224289	75248429	336	-0.0671125	0.61639	0.683502	0.0255684	hypo	9
chr14	100619064	100636710	225	-0.0852406	0.585533	0.670773	0.0217046	hypo	9
chr10	64566947	64579993	247	-0.086064	0.254598	0.340662	0.024734	hypo	9
chr10	131253717	131271706	241	-0.107007	0.686595	0.793602	0.028709	hypo	9
chr4	144269866	144320304	317	-0.0545475	0.711985	0.766533	0.0196469	hypo	6
chr8	110973516	111012281	314	-0.0612141	0.689658	0.750873	0.0218362	hypo	8
chr11	34251990	34272453	228	-0.0949004	0.718676	0.813576	0.0246326	hypo	9
chr19	2246396	2265405	343	-0.124626	0.47464	0.599266	0.0483887	hypo	8
chr4	154648077	154704317	370	-0.0498114	0.765078	0.814889	0.0209346	hypo	6
chr17	38071945	38092463	262	-0.0992924	0.665367	0.764659	0.0299265	hypo	9
chr2	102010582	102030624	228	-0.0821961	0.673754	0.755951	0.0215707	hypo	9
chr1	228216213	228240614	283	-0.0733713	0.699174	0.772545	0.0238147	hypo	9
chr13	50677130	50701957	278	-0.0634074	0.468921	0.532328	0.02015	hypo	9
chr7	127766759	127785074	195	-0.0986564	0.53704	0.635697	0.0220957	hypo	9
chr9	134598853	134616179	242	-0.0844767	0.405862	0.490339	0.0236317	hypo	9
chr5	118689638	118719507	254	-0.0853167	0.601692	0.687008	0.0245344	hypo	8
chr9	37395627	37413368	214	-0.0919648	0.656805	0.74877	0.0227406	hypo	9
chr1	39021847	39048198	286	-0.0831814	0.668153	0.751334	0.0274098	hypo	9
chr5	14199068	14219946	200	-0.0934331	0.67325	0.766683	0.021625	hypo	9
chr22	39533446	39550673	271	-0.0976069	0.547542	0.645149	0.0304549	hypo	9
chr14	51280984	51304681	275	-0.0761044	0.499684	0.575788	0.0247582	hypo	9
chr12	11906666	11934851	301	-0.0666448	0.67631	0.742955	0.0232885	hypo	8
chr14	67702780	67719375	189	-0.104364	0.51166	0.616024	0.0233642	hypo	9
chr7	1085667	1104711	347	-0.075063	0.603387	0.678451	0.0305217	hypo	9
chr1	32808528	32834589	315	-0.0774626	0.608107	0.685569	0.0286487	hypo	9
chr3	54104508	54131290	238	-0.0783907	0.694886	0.773277	0.0219657	hypo	9
chr2	223521556	223544601	196	-0.095161	0.6176	0.712761	0.022274	hypo	9
chr2	12159477	12203573	331	-0.0581191	0.696748	0.754868	0.0228067	hypo	6
chr22	37665711	37684885	289	-0.074341	0.663661	0.738002	0.0254911	hypo	9
chr15	90725007	90744233	294	-0.0708795	0.589894	0.660773	0.0248354	hypo	9
chr1	89449459	89475129	228	-0.0878572	0.577145	0.665002	0.0238814	hypo	9
chr17	7887786	7907671	268	-0.0853741	0.660249	0.745623	0.0272579	hypo	9
chr6	138230842	138272174	264	-0.0720864	0.683848	0.755934	0.0228938	hypo	7
chr12	52419150	52435112	251	-0.0887911	0.433127	0.521918	0.02804	hypo	9
chr20	61630555	61644483	324	-0.0924815	0.442675	0.535156	0.0371683	hypo	9
chr14	52305022	52337033	245	-0.0734317	0.582889	0.656321	0.0217046	hypo	8
chr20	43989978	44005812	274	-0.0729987	0.500391	0.573389	0.0241713	hypo	9
chr2	231779013	231799668	227	-0.0878301	0.787299	0.875129	0.0236851	hypo	9
chr6	13417399	13438954	242	-0.0829279	0.66634	0.749268	0.0242052	hypo	9
chr20	47381483	47406121	321	-0.0692195	0.691684	0.760904	0.0268413	hypo	9
chr13	30560894	30597880	358	-0.0452862	0.840241	0.885528	0.0196768	hypo	8
chr4	146005812	146028787	196	-0.0991074	0.483373	0.58248	0.0234731	hypo	8
chr7	107293761	107315063	189	-0.12013	0.594833	0.714963	0.0279613	hypo	9
chr1	33168125	33198482	290	-0.0713635	0.698655	0.770019	0.0256306	hypo	8
chr17	73255958	73275414	317	-0.095104	0.51876	0.613864	0.0380137	hypo	9
chr15	51463130	51495128	255	-0.0685463	0.735807	0.804353	0.0217317	hypo	8
chr14	105751179	105769561	293	-0.0703503	0.604675	0.675026	0.0262105	hypo	9
chr3	195628125	195646727	273	-0.0796014	0.567997	0.647599	0.0269181	hypo	9
chr15	31622135	31640589	236	-0.0779929	0.583242	0.661235	0.0230123	hypo	9
chr2	242476887	242492714	275	-0.0846722	0.67789	0.762562	0.029945	hypo	9
chr2	120386428	120423883	296	-0.0572423	0.761054	0.818296	0.0211133	hypo	8
chr15	63402580	63419114	166	-0.103256	0.710106	0.813362	0.0213936	hypo	9
chr10	135199188	135212681	236	-0.0781335	0.58495	0.663084	0.0233698	hypo	9
chr6	17980934	17995138	181	-0.105493	0.489013	0.594506	0.0244638	hypo	9
chr15	102184644	102198176	211	-0.0879367	0.553519	0.641455	0.0232692	hypo	9
chr4	144432943	144445872	186	-0.0911504	0.558918	0.650068	0.0216219	hypo	9
chr9	136925900	136942217	239	-0.0763046	0.416064	0.492369	0.0229441	hypo	9
chr14	77417498	77430700	214	-0.080678	0.561045	0.641723	0.0218149	hypo	9
chr6	30494579	30513912	209	-0.099077	0.680012	0.779089	0.0266399	hypo	9
chr15	72475580	72494954	247	-0.0792823	0.71279	0.792072	0.0252644	hypo	9
chr8	142030387	142051145	310	-0.0596646	0.656521	0.716186	0.0234917	hypo	9
chr9	139615688	139632141	271	-0.0724881	0.593694	0.666182	0.0249126	hypo	9
chr3	49886780	49901889	206	-0.110252	0.674728	0.784981	0.028679	hypo	9
chr9	100809533	100829541	197	-0.109511	0.700194	0.809705	0.0268322	hypo	9
chr19	47621827	47636171	234	0.124703	0.784896	0.660192	0.0371027	hyper	9
chr18	48398795	48411744	172	-0.119737	0.541947	0.661683	0.0258565	hypo	9
chr2	25632606	25652389	206	-0.0810836	0.702111	0.783195	0.0212251	hypo	9
chr1	13815211	13835972	299	-0.0677918	0.712124	0.779916	0.0257924	hypo	9
chr10	6195204	6212377	243	-0.0724015	0.7047	0.777102	0.0224181	hypo	9
chr4	39172461	39192344	222	-0.0733669	0.596006	0.669373	0.0209046	hypo	9
chr17	80179566	80194100	232	-0.0926115	0.503502	0.596114	0.0274729	hypo	9
chr13	88158301	88238592	348	-0.0442601	0.801983	0.846243	0.0196768	hypo	3
chr14	50081280	50100016	311	-0.082684	0.413139	0.495823	0.0327639	hypo	9
chr3	5224689	5238674	212	-0.0817868	0.366808	0.448595	0.0222299	hypo	9
chr3	4877766	4917347	340	-0.0688166	0.749855	0.818672	0.030176	hypo	8
chr4	160643787	160711210	315	-0.0484007	0.78504	0.83344	0.0195167	hypo	5
chr17	29228986	29248221	281	-0.0938376	0.658631	0.752468	0.0340093	hypo	9
chr2	200809835	200833310	197	-0.114989	0.612372	0.72736	0.028649	hypo	7
chr4	114880087	114916807	192	-0.0793293	0.645555	0.724884	0.0195167	hypo	8
chr20	60873704	60885052	261	-0.121697	0.625842	0.747539	0.0407432	hypo	9
chr2	216864372	216879917	202	-0.0812824	0.569052	0.650335	0.0211997	hypo	9
chr11	200639	213171	258	-0.0871135	0.476615	0.563729	0.0290024	hypo	9
chr1	212843053	212866411	223	-0.114069	0.670589	0.784658	0.0328336	hypo	7
chr17	80368815	80382878	249	-0.10017	0.63152	0.731691	0.0316344	hypo	9
chr11	9280663	9295569	197	-0.0967403	0.680067	0.776807	0.024633	hypo	9
chr12	51656363	51671554	190	-0.10124	0.653768	0.755008	0.0247402	hypo	9
chr7	55623360	55643802	237	-0.102408	0.458076	0.560484	0.0311819	hypo	9
chr1	8368407	8381107	216	-0.0880807	0.620834	0.708915	0.0247367	hypo	9
chr4	75839930	75869471	239	-0.0924323	0.602972	0.695405	0.0286022	hypo	8
chr3	51987287	52005978	199	-0.0938583	0.542831	0.63669	0.0243299	hypo	9
chr5	180244178	180264633	236	-0.0957936	0.607994	0.703788	0.0296972	hypo	9
chr4	99570953	99588968	203	-0.0936216	0.445249	0.53887	0.0248533	hypo	9
chr2	238873690	238884469	188	0.106255	0.661876	0.555621	0.0262497	hyper	9
chr11	118748792	118766120	203	-0.0970957	0.54004	0.637136	0.0256806	hypo	9
chr6	143154169	143193727	271	-0.0636221	0.60251	0.666132	0.0225288	hypo	8
chr1	198120334	198134171	170	-0.106798	0.406282	0.513079	0.0237626	hypo	9
chr10	6090562	6114386	276	-0.0818075	0.553649	0.635457	0.0293981	hypo	9
chr5	148923920	148936249	241	-0.0905803	0.416778	0.507359	0.0298265	hypo	9
chr12	1760355	1779985	236	-0.0923325	0.696915	0.789247	0.0286685	hypo	9
chr6	27796147	27809074	231	-0.0939354	0.312934	0.406869	0.029321	hypo	9
chr1	22133818	22149812	212	-0.0988125	0.721748	0.820561	0.027022	hypo	9
chr8	22764699	22783024	231	-0.0713682	0.725666	0.797034	0.0217581	hypo	9
chr10	104667042	104682939	265	-0.113685	0.435673	0.549358	0.0396769	hypo	9
chr14	22441027	22485992	289	-0.0568564	0.79205	0.848907	0.0217381	hypo	6
chr20	61572338	61588377	278	-0.0625926	0.689024	0.751616	0.0230714	hypo	9
chr3	192914548	192961240	250	-0.0685522	0.734565	0.803117	0.0230101	hypo	4
chr1	40831199	40855749	194	-0.115746	0.467579	0.583325	0.0303488	hypo	7
chr8	119619420	119650288	259	-0.0659513	0.683099	0.749051	0.0226499	hypo	8
chr14	68718034	68755300	235	-0.0833848	0.624584	0.707969	0.0263153	hypo	8
chr9	37643774	37663070	188	-0.120466	0.639889	0.760354	0.0300617	hypo	9
chr11	14903195	14926728	231	-0.0901315	0.460396	0.550528	0.0285537	hypo	9
chr10	92737140	92769690	207	-0.0897772	0.704394	0.794171	0.024659	hypo	7
chr20	47657215	47670468	196	-0.0926636	0.577393	0.670056	0.0240504	hypo	9
chr15	93343986	93358603	284	-0.0777329	0.543822	0.621555	0.0296249	hypo	9
chr15	101446477	101469674	322	-0.0732471	0.567608	0.640855	0.0317086	hypo	9
chr19	18659344	18674416	255	-0.123338	0.706025	0.829363	0.0419433	hypo	9
chr4	154987054	155041644	247	-0.0590238	0.784189	0.843213	0.0195167	hypo	6
chr1	19097381	19123256	281	-0.0636925	0.689742	0.753434	0.0239801	hypo	9
chr3	11188412	11204842	155	-0.105181	0.596409	0.701591	0.0218152	hypo	9
chr17	56589416	56617544	275	-0.0960415	0.456838	0.552879	0.0356362	hypo	8
chr3	190027076	190070399	265	-0.061885	0.72762	0.789505	0.0220361	hypo	7
chr6	36740042	36759146	236	-0.0712619	0.734434	0.805696	0.0226572	hypo	9
chr1	226836225	226855707	266	-0.0660453	0.672466	0.738511	0.023695	hypo	9
chr21	26927133	26953271	219	-0.104879	0.47543	0.580309	0.0303127	hypo	8
chr9	132076097	132091366	240	-0.0823624	0.708132	0.790495	0.0269646	hypo	9
chr10	124414391	124450496	275	-0.058189	0.810779	0.868968	0.0216393	hypo	8
chr16	3062269	3074184	244	-0.0812841	0.458633	0.539917	0.0270128	hypo	9
chr10	69636507	69650101	213	-0.0751987	0.639614	0.714813	0.0217173	hypo	9
chr20	23822183	23870713	306	-0.0549389	0.751634	0.806573	0.0228557	hypo	6
chr14	70447444	70485996	310	-0.0516897	0.802927	0.854617	0.0217979	hypo	8
chr16	10966259	10984442	243	-0.0821816	0.310597	0.392778	0.0274377	hypo	9
chr5	131699957	131725365	277	-0.1061	0.694666	0.800766	0.0389022	hypo	8
chr1	145399740	145428375	268	-0.0748701	0.637425	0.712295	0.0273526	hypo	8
chr15	74208740	74230545	232	-0.0935706	0.549491	0.643062	0.0291541	hypo	9
chr11	65873471	65905040	314	-0.057625	0.715244	0.772869	0.0247298	hypo	8
chr17	26675567	26692365	201	-0.103742	0.658595	0.762337	0.0287653	hypo	9
chr3	46496340	46520656	217	-0.0746629	0.776702	0.851365	0.0223693	hypo	9
chr5	40675050	40688324	207	-0.0844276	0.18689	0.271318	0.0243262	hypo	9
chr5	79768624	79794458	233	-0.0671643	0.663243	0.730407	0.0216186	hypo	9
chr4	46982941	47014677	225	-0.0624168	0.624194	0.68661	0.0195171	hypo	8
chr21	39400388	39437178	266	-0.0570524	0.798126	0.855179	0.0210946	hypo	8
chr10	50743940	50761730	213	-0.103717	0.548159	0.651877	0.0311746	hypo	9
chr1	215724560	215748452	181	-0.107073	0.676832	0.783905	0.0267525	hypo	8
chr6	15391541	15418741	271	-0.0620451	0.752435	0.81448	0.0233725	hypo	9
chr15	41792303	41805296	269	-0.0850361	0.377807	0.462843	0.032211	hypo	9
chr10	134307640	134325345	275	-0.0577403	0.782516	0.840257	0.0221208	hypo	9
chr7	42909000	42939080	150	-0.112015	0.573765	0.68578	0.0236326	hypo	5
chr13	34633322	34695275	312	-0.0450167	0.835403	0.880419	0.0196768	hypo	5
chr10	120920331	120936478	243	-0.0726114	0.681065	0.753677	0.0248911	hypo	9
chr2	27528835	27546932	244	-0.0628688	0.679903	0.742772	0.0215552	hypo	9
chr10	11306769	11322680	223	-0.0799242	0.791577	0.871501	0.0248094	hypo	9
chr11	30601481	30617041	140	-0.135369	0.455043	0.590412	0.0267832	hypo	9
chr21	44815709	44828203	243	-0.0616934	0.691078	0.752771	0.0210946	hypo	9
chr10	126373244	126391581	255	-0.0812322	0.723563	0.804795	0.0288553	hypo	9
chr4	146395387	146413335	184	-0.135327	0.491765	0.627093	0.0344965	hypo	7
chr13	108909310	108930653	173	-0.0807271	0.694678	0.775405	0.0196768	hypo	9
chr7	105691218	105713411	252	-0.0705017	0.610818	0.68132	0.0249841	hypo	9
chr1	156246792	156265321	238	-0.122605	0.614429	0.737034	0.0417222	hypo	8
chr11	130022668	130037054	184	-0.0962427	0.658725	0.754967	0.0249796	hypo	9
chr15	65588696	65602836	245	-0.0618445	0.565535	0.627379	0.0214311	hypo	9
chr18	33066179	33087557	224	-0.0632906	0.640862	0.704152	0.0200453	hypo	9
chr1	3488016	3505443	226	-0.077656	0.730667	0.808323	0.0251391	hypo	9
chr4	76592944	76610641	257	-0.0581011	0.607302	0.665403	0.0210769	hypo	9
chr4	141340413	141364852	159	-0.0884283	0.619087	0.707515	0.0199219	hypo	9
chr11	56920586	56960469	284	-0.0617253	0.676305	0.738031	0.0249085	hypo	7
chr6	168218972	168236312	244	-0.0974714	0.452297	0.549768	0.0336255	hypo	9
chr12	124239850	124254749	213	-0.0787746	0.694468	0.773243	0.0237808	hypo	9
chr9	107723909	107741427	194	-0.0825159	0.713472	0.795988	0.0227956	hypo	9
chr6	28043125	28063691	210	0.101315	0.718332	0.617017	0.0312164	hyper	9
chr13	49103235	49128356	232	-0.0843536	0.622773	0.707126	0.0276598	hypo	9
chr4	123834437	123853201	191	-0.0786846	0.517467	0.596151	0.0217515	hypo	9
chr1	27145899	27163722	188	-0.101239	0.687995	0.789233	0.0271552	hypo	9
chr10	93637845	93652756	188	-0.111918	0.602598	0.714516	0.0298993	hypo	9
chr14	21143346	21160003	279	-0.0544518	0.388661	0.443113	0.0217046	hypo	9
chr13	114601248	114623105	257	-0.0535297	0.802904	0.856433	0.0196768	hypo	9
chr11	46839739	46860269	163	-0.121507	0.771857	0.893364	0.0288794	hypo	9
chr6	100427134	100465710	212	-0.0835901	0.668263	0.751853	0.0252308	hypo	6
chr2	224794906	224821308	247	-0.0600535	0.620495	0.680548	0.0213787	hypo	9
chr2	64440005	64464756	220	-0.0684132	0.749832	0.818245	0.0215448	hypo	9
chr2	242622337	242634012	246	-0.092568	0.579823	0.672391	0.0326662	hypo	9
chr12	65535370	65567750	247	-0.0759467	0.641663	0.71761	0.0273473	hypo	8
chr1	85445913	85472941	230	-0.0751778	0.419156	0.494333	0.0249648	hypo	8
chr6	16465211	16497894	251	-0.067748	0.811517	0.879265	0.0244736	hypo	8
chr20	43588785	43604274	194	-0.0828105	0.425194	0.508005	0.0233523	hypo	9
chr1	27332176	27352233	265	-0.0714604	0.721153	0.792613	0.0273213	hypo	9
chr11	65115866	65130037	213	-0.0847148	0.668319	0.753033	0.026185	hypo	9
chr17	73117887	73135277	265	-0.123467	0.695852	0.819319	0.0471428	hypo	9
chr22	24980305	24993416	201	-0.13019	0.61857	0.74876	0.0384054	hypo	9
chr12	7791740	7818635	282	-0.0559625	0.757961	0.813924	0.022991	hypo	9
chr15	101778606	101799678	285	-0.0705915	0.550245	0.620837	0.0292454	hypo	9
chr8	27461589	27480451	233	-0.075475	0.613287	0.688762	0.0258276	hypo	9
chr9	93949652	93967360	201	-0.126628	0.485115	0.611743	0.0370539	hypo	8
chr22	22711085	22753974	279	-0.0653099	0.681159	0.746469	0.0266813	hypo	7
chr21	44489815	44501579	278	-0.0606655	0.52654	0.587206	0.0247227	hypo	9
chr14	104088126	104102416	237	-0.123946	0.510262	0.634209	0.0429444	hypo	9
chr6	14063539	14089920	212	-0.0771889	0.720522	0.797711	0.0237829	hypo	9
chr11	63431525	63443322	191	-0.0887963	0.627429	0.716225	0.0249369	hypo	9
chr14	24419288	24480538	223	-0.0826244	0.689335	0.771959	0.0272033	hypo	3
chr5	90566105	90581817	164	-0.0942232	0.524922	0.619146	0.0228019	hypo	9
chr1	76059876	76098363	209	-0.0772979	0.548028	0.625326	0.0237006	hypo	6
chr12	779300	800027	251	-0.0617147	0.75371	0.815425	0.0227522	hypo	9
chr1	15244664	15260508	196	-0.103196	0.626476	0.729672	0.0291595	hypo	9
chr15	53393828	53444665	249	-0.0581354	0.756544	0.814679	0.0213518	hypo	6
chr17	74440003	74455966	200	-0.161246	0.634936	0.796182	0.0462969	hypo	4
chr1	235525364	235538477	182	-0.0900433	0.711744	0.801788	0.0241415	hypo	9
chr15	93268945	93289103	202	-0.0719916	0.7808	0.852792	0.0215754	hypo	9
chr5	176912723	176935142	304	-0.0903843	0.58568	0.676065	0.0406141	hypo	9
chr1	107673552	107697938	184	-0.0950692	0.51917	0.614239	0.025924	hypo	9
chr8	41499603	41516360	208	-0.0705042	0.576167	0.646671	0.0217581	hypo	9
chr1	201349627	201374776	265	-0.0830221	0.69663	0.779652	0.0326711	hypo	9
chr5	134886803	134904427	195	-0.0797858	0.654443	0.734229	0.0234813	hypo	9
chr10	49877947	49902697	202	-0.0789963	0.547633	0.62663	0.0237626	hypo	9
chr11	123294623	123307767	185	-0.103784	0.525634	0.629418	0.0287004	hypo	9
chr4	164409626	164428327	180	-0.0805662	0.591725	0.672291	0.0217647	hypo	9
chr1	34511337	34542368	231	-0.068264	0.735209	0.803473	0.0235113	hypo	8
chr8	129073711	129095863	195	-0.0747185	0.779152	0.853871	0.0217581	hypo	9
chr7	85547128	85611482	273	-0.0537995	0.778863	0.832663	0.0219556	hypo	5
chr7	105312114	105327472	177	-0.0853165	0.611724	0.69704	0.0226747	hypo	9
chr20	2092337	2114735	243	-0.0628728	0.826549	0.889422	0.0228557	hypo	9
chr1	27696406	27716242	234	-0.0832331	0.65829	0.741523	0.0299389	hypo	9
chr6	31365546	31386296	230	-0.0974218	0.528906	0.626328	0.0329667	hypo	9
chr5	154027074	154042981	206	-0.0702196	0.668183	0.738403	0.0217824	hypo	9
chr10	120781805	120796052	187	-0.0835874	0.55307	0.636657	0.0233396	hypo	9
chr18	59843660	59861307	213	-0.0746314	0.435852	0.510484	0.0239527	hypo	9
chr15	40757267	40773529	157	-0.0995091	0.606562	0.706071	0.0236901	hypo	9
chr1	36176409	36193289	205	-0.0917082	0.618631	0.710339	0.0281587	hypo	9
chr13	97317350	97364611	245	-0.053206	0.775206	0.828412	0.0197323	hypo	6
chr11	12901718	12920161	211	-0.077171	0.769681	0.846852	0.0246763	hypo	9
chr5	60033776	60080180	255	-0.0735078	0.79356	0.867067	0.0283315	hypo	4
chr5	180684644	180696563	195	-0.080807	0.575683	0.656491	0.0239829	hypo	9
chr16	14372234	14386800	201	-0.0954157	0.619687	0.715102	0.0291666	hypo	9
chr7	631523	647079	277	-0.0612266	0.65256	0.713787	0.0257405	hypo	9
chr6	147161580	147188291	196	-0.0760835	0.776288	0.852372	0.0226032	hypo	9
chr13	29093734	29114104	259	-0.0819761	0.495303	0.577279	0.0320093	hypo	9
chr2	85814114	85827864	213	-0.0759874	0.486699	0.562686	0.0251454	hypo	9
chr10	15481477	15510335	247	-0.0590357	0.756025	0.815061	0.0222734	hypo	9
chr15	89968415	89986159	202	-0.0730726	0.646484	0.719557	0.0223898	hypo	9
chr1	2989270	3001939	262	-0.084637	0.567833	0.65247	0.033885	hypo	9
chr2	106482637	106496795	197	-0.0699073	0.821951	0.891858	0.0210406	hypo	9
chr4	148643125	148658450	192	-0.0987029	0.567267	0.66597	0.0286685	hypo	9
chr22	39650670	39664543	209	-0.0797534	0.731763	0.811517	0.0254913	hypo	9
chr12	48389621	48402054	186	-0.105184	0.291486	0.39667	0.0309636	hypo	9
chr1	226870068	226891037	190	-0.0885043	0.616898	0.705402	0.0263847	hypo	9
chr3	16465324	16487619	191	-0.0784045	0.762226	0.840631	0.0227375	hypo	9
chr10	105028520	105043821	170	-0.084871	0.447835	0.532706	0.022202	hypo	9
chr12	69315966	69339418	188	-0.0960256	0.646403	0.742428	0.0276069	hypo	8
chr7	33096149	33111840	188	-0.157617	0.456394	0.614011	0.0453674	hypo	4
chr2	107491382	107508054	196	-0.092765	0.355342	0.448108	0.0287153	hypo	9
chr6	167557522	167572194	212	-0.0748284	0.753485	0.828314	0.0242441	hypo	9
chr3	22389544	22423379	194	-0.103516	0.664531	0.768047	0.0304201	hypo	7
chr6	36092428	36107485	221	-0.0731001	0.648351	0.721451	0.0246803	hypo	9
chr22	22296337	22313442	186	-0.121774	0.583534	0.705308	0.034085	hypo	9
chr2	101304828	101340293	256	-0.0533986	0.808281	0.861679	0.0210406	hypo	8
chr20	35963320	35981582	210	-0.0706915	0.682117	0.752808	0.0228557	hypo	9
chr2	85167563	85188089	224	-0.0681643	0.8029	0.871064	0.0238995	hypo	9
chr12	101797594	101813338	182	-0.0820979	0.485854	0.567952	0.0231309	hypo	9
chr15	74667336	74692415	260	-0.0786855	0.544786	0.623471	0.03121	hypo	9
chr3	11883285	11901234	231	-0.0705437	0.575002	0.645545	0.0250926	hypo	9
chr4	22028920	22099328	286	-0.0447848	0.766119	0.810904	0.0198901	hypo	3
chr7	35481909	35511184	220	-0.0793044	0.728249	0.807554	0.0268321	hypo	8
chr10	44151444	44170902	189	-0.0766604	0.667255	0.743915	0.022559	hypo	9
chr15	93639838	93660424	248	-0.0565042	0.752619	0.809123	0.0217923	hypo	9
chr6	35478485	35498416	260	-0.0558468	0.76943	0.825277	0.0225671	hypo	9
chr5	133367239	133384457	209	-0.0687531	0.812771	0.881524	0.0223	hypo	9
chr6	37747197	37765131	211	-0.0713274	0.69632	0.767647	0.0233712	hypo	9
chr22	38132957	38147369	185	-0.0884391	0.659265	0.747704	0.0254911	hypo	9
chr1	220259760	220274385	215	-0.0799106	0.553584	0.633495	0.026589	hypo	9
chr14	74311450	74322715	178	-0.0822795	0.632261	0.71454	0.0229342	hypo	9
chr11	131551967	131564914	204	-0.0815175	0.655581	0.737099	0.0262545	hypo	9
chr1	157004122	157033116	230	-0.0666173	0.677483	0.744101	0.023899	hypo	8
chr10	126475956	126488003	188	-0.0806611	0.56493	0.645591	0.0243034	hypo	9
chr16	30564027	30578120	226	-0.0903212	0.592339	0.68266	0.0326348	hypo	9
chr10	126097379	126113906	215	-0.0892077	0.67338	0.762588	0.0299773	hypo	9
chr18	32053268	32089387	204	-0.0625318	0.658213	0.720745	0.0200453	hypo	8
chr9	99374444	99389811	218	-0.0818065	0.576629	0.658435	0.0278103	hypo	9
chr3	65563584	65586789	196	-0.069662	0.725834	0.795496	0.021458	hypo	9
chr12	6852989	6868356	224	-0.0670474	0.704918	0.771965	0.023731	hypo	9
chr15	53246609	53288605	243	-0.055832	0.792325	0.848157	0.0213518	hypo	7
chr10	63800145	63822715	190	-0.086434	0.601367	0.687801	0.0259553	hypo	9
chr4	55376485	55415394	235	-0.0526484	0.774255	0.826904	0.0195218	hypo	8
chr13	28531385	28542114	257	-0.0505687	0.163262	0.213831	0.0206233	hypo	9
chr21	43530849	43543328	209	-0.0647216	0.53015	0.594872	0.0214609	hypo	9
chr21	26759901	26803075	233	-0.0579861	0.777253	0.835239	0.0214381	hypo	7
chr5	180670513	180680689	206	-0.0779006	0.409458	0.487359	0.0261128	hypo	9
chr16	66724566	66737918	166	-0.101398	0.593342	0.69474	0.0268113	hypo	9
chr7	1623376	1641964	268	-0.0647157	0.751263	0.815979	0.02764	hypo	9
chr14	100031525	100049302	265	-0.0516043	0.752041	0.803645	0.0217046	hypo	9
chr16	31211550	31226317	217	-0.0758697	0.518961	0.594831	0.0262071	hypo	9
chr12	109008549	109025314	196	-0.0743965	0.691981	0.766377	0.0232253	hypo	9
chr17	62215402	62231333	255	-0.111625	0.521653	0.633278	0.0455092	hypo	9
chr11	58870058	58892258	149	-0.13367	0.612316	0.745987	0.0325372	hypo	6
chr9	132198326	132217570	224	-0.0693028	0.568584	0.637887	0.0251235	hypo	9
chr4	177236320	177250832	177	-0.0809672	0.50019	0.581157	0.0233125	hypo	9
chr15	74715008	74730978	199	-0.112832	0.405819	0.518651	0.0355515	hypo	9
chr6	90866715	90902018	220	-0.0640248	0.689241	0.753266	0.0225288	hypo	8
chr2	233291541	233306704	205	-0.0899535	0.747045	0.836998	0.0296393	hypo	9
chr14	57255268	57271596	203	-0.0668735	0.267454	0.334327	0.0217718	hypo	9
chr4	185736911	185755853	242	-0.0864241	0.585357	0.671781	0.0336734	hypo	9
chr2	11613067	11632040	225	-0.0624904	0.674033	0.736524	0.02292	hypo	9
chr9	122932974	122966232	240	-0.0602137	0.757774	0.817988	0.0231918	hypo	8
chr3	69764804	69793010	238	-0.0713681	0.657799	0.729167	0.0270903	hypo	8
chr2	208186699	208210312	186	-0.0702658	0.798591	0.868856	0.0210406	hypo	9
chr7	108156286	108173372	202	-0.0917666	0.611757	0.703523	0.0300969	hypo	9
chr3	13960947	13988144	193	-0.0698641	0.735506	0.80537	0.0218045	hypo	8
chr16	89472809	89490271	267	-0.0615981	0.76017	0.821768	0.0265799	hypo	9
chr1	11792924	11807759	216	-0.0986355	0.591818	0.690454	0.0338994	hypo	9
chr18	54963416	55006708	261	-0.0477606	0.797124	0.844884	0.0201811	hypo	7
chr15	100037806	100055360	211	-0.0706808	0.506178	0.576859	0.0244177	hypo	9
chr1	173164798	173201082	169	-0.0859281	0.676597	0.762525	0.0235113	hypo	6
chr21	42435892	42450542	203	-0.0641736	0.738126	0.8023	0.0210946	hypo	9
chr1	208037749	208052013	173	-0.0839863	0.556949	0.640935	0.0235557	hypo	9
chr13	100066474	100084078	266	-0.0765908	0.6009	0.677491	0.0330899	hypo	9
chr2	227644184	227666256	230	-0.0818487	0.500376	0.582225	0.0302311	hypo	9
chr18	72915972	72926862	209	-0.0641149	0.311149	0.375264	0.0218745	hypo	9
chr16	8615405	8632425	227	-0.084519	0.665058	0.749577	0.0312879	hypo	9
chr12	58152612	58165961	212	-0.0658989	0.320214	0.386113	0.0227528	hypo	9
chr4	81942295	81973351	224	-0.0545649	0.586192	0.640756	0.0198834	hypo	8
chr1	16290483	16308813	221	-0.102169	0.592593	0.694763	0.0366466	hypo	9
chr1	2803437	2818169	224	-0.0654016	0.815987	0.881389	0.0238432	hypo	9
chr13	29384974	29408168	191	-0.0947374	0.585223	0.67996	0.030133	hypo	9
chr16	10865451	10883737	208	-0.0766081	0.795001	0.87161	0.0260109	hypo	9
chr6	161149080	161182043	200	-0.0738478	0.699588	0.773436	0.0245172	hypo	8
chr16	84000906	84016824	201	-0.0832143	0.77353	0.856744	0.027427	hypo	9
chr4	153036760	153086566	274	-0.0435898	0.776918	0.820508	0.0195167	hypo	6
chr20	22659019	22681066	229	-0.0622724	0.74343	0.805702	0.0233268	hypo	9
chr1	8010522	8021337	170	0.0959655	0.64139	0.545425	0.0273316	hyper	9
chr9	123679846	123699548	255	-0.10877	0.465494	0.574265	0.0459154	hypo	9
chr4	151932798	151946176	183	-0.0900366	0.458869	0.548905	0.028383	hypo	9
chr2	218774740	218796528	235	-0.0588734	0.79697	0.855844	0.0228351	hypo	9
chr10	69983527	69998819	192	-0.122396	0.612928	0.735324	0.0384179	hypo	9
chr17	79863158	79877134	237	-0.0733557	0.634098	0.707454	0.0285453	hypo	9
chr10	114777936	114796478	198	-0.0665663	0.829069	0.895635	0.0216161	hypo	9
chr1	183989560	184018677	170	-0.0954569	0.569545	0.665002	0.0269482	hypo	8
chr21	39037989	39058753	197	-0.0667903	0.754891	0.821681	0.0215198	hypo	9
chr10	26559970	26586107	246	-0.0536889	0.824516	0.878205	0.0216879	hypo	9
chr14	71100624	71114333	148	-0.099453	0.511994	0.611447	0.0243013	hypo	9
chr7	851878	865928	229	-0.095537	0.610071	0.705608	0.0370755	hypo	9
chr8	140634267	140648978	222	-0.059544	0.768021	0.827565	0.0217581	hypo	9
chr6	51410500	51461960	245	-0.0558502	0.798202	0.854052	0.0225288	hypo	6
chr15	41188806	41202764	218	-0.071949	0.601547	0.673496	0.0259683	hypo	9
chr18	45834709	45863725	268	-0.0504109	0.805838	0.856249	0.0223298	hypo	9
chr3	188002426	188027191	213	-0.0613429	0.807918	0.869261	0.0216246	hypo	9
chr5	140850869	140861242	182	-0.0757697	0.440083	0.515853	0.0228213	hypo	9
chr4	143746741	143781036	213	-0.0707953	0.604742	0.675538	0.0249831	hypo	8
chr2	148596051	148609924	155	-0.102713	0.423676	0.526388	0.027062	hypo	9
chr4	2837476	2853554	213	-0.055731	0.483445	0.539176	0.0197295	hypo	9
chr3	106946847	106966941	189	-0.0683345	0.679579	0.747913	0.0214414	hypo	9
chr14	55514465	55531369	225	-0.0850971	0.707504	0.792601	0.0315746	hypo	9
chr11	62780509	62802879	255	-0.0617692	0.745674	0.807443	0.0261454	hypo	9
chr4	40202846	40218067	180	-0.0697703	0.60536	0.67513	0.02093	hypo	9
chr18	60841818	60862554	187	-0.065975	0.780866	0.846841	0.0205582	hypo	9
chr2	219078091	219092616	182	-0.110003	0.443396	0.553399	0.0331681	hypo	9
chr15	90925157	90944043	203	-0.0649661	0.693386	0.758352	0.0219439	hypo	9
chr10	3794204	3807520	176	-0.073798	0.725693	0.799491	0.0216178	hypo	9
chr4	120527900	120558742	235	-0.0585135	0.618281	0.676794	0.0228107	hypo	8
chr14	23441467	23455615	187	-0.088331	0.510923	0.599254	0.0276024	hypo	9
chr11	45385391	45401068	204	-0.0786658	0.674984	0.75365	0.0266958	hypo	9
chr2	242794112	242812316	261	-0.0824264	0.63376	0.716186	0.0362436	hypo	9
chr2	238601311	238613840	216	-0.117933	0.392976	0.510909	0.0442564	hypo	9
chr1	67182617	67220064	266	-0.0551157	0.678231	0.733346	0.0246	hypo	8
chr13	110063829	110090647	187	-0.0638401	0.759631	0.823471	0.0200028	hypo	9
chr5	171874702	171889742	220	-0.0734181	0.69144	0.764858	0.02707	hypo	9
chr6	45709446	45754519	281	-0.0477231	0.829974	0.877697	0.0225288	hypo	6
chr21	45605264	45618845	246	-0.0517795	0.816026	0.867806	0.0214333	hypo	9
chr2	241848816	241861910	191	-0.0746299	0.68379	0.75842	0.0238428	hypo	9
chr19	51142759	51162846	248	-0.0895091	0.568684	0.658193	0.037344	hypo	9
chr7	73887641	73901453	207	-0.0649591	0.69136	0.756319	0.0227026	hypo	9
chr14	70006405	70024923	224	-0.0660854	0.728292	0.794378	0.0249142	hypo	9
chr9	131094207	131108669	198	-0.111006	0.654214	0.765219	0.03829	hypo	9
chr2	234842372	234859188	179	-0.0764685	0.701361	0.77783	0.0231744	hypo	9
chr2	81867577	81924489	244	-0.0752225	0.709049	0.784272	0.0304931	hypo	4
chr19	15078986	15094114	194	-0.122783	0.708484	0.831267	0.0398191	hypo	9
chr21	43835234	43850772	204	-0.0616033	0.745545	0.807148	0.0212882	hypo	9
chr6	99785388	99804967	208	-0.0971157	0.556608	0.653723	0.0343244	hypo	9
chr1	9477737	9490681	223	-0.0801852	0.52591	0.606095	0.0305838	hypo	9
chr6	2854097	2868771	172	-0.0865323	0.628774	0.715306	0.0260617	hypo	9
chr16	2053532	2066774	226	-0.0826866	0.528124	0.61081	0.032443	hypo	9
chr10	134115618	134128366	242	-0.0610581	0.685702	0.74676	0.0250476	hypo	9
chr6	43602094	43613954	223	-0.0832093	0.588774	0.671983	0.0308963	hypo	9
chr3	184291250	184303832	195	-0.069726	0.734353	0.804079	0.0234128	hypo	9
chr11	45949771	45963469	189	-0.0782666	0.568531	0.646797	0.0252133	hypo	9
chr20	44743359	44762026	235	-0.0662913	0.656608	0.722899	0.0264363	hypo	9
chr4	109461314	109488663	171	-0.0670739	0.72407	0.791144	0.0195167	hypo	8
chr2	25380604	25396071	229	-0.0688332	0.565832	0.634665	0.0268926	hypo	9
chr17	46981777	46996305	203	-0.12229	0.66104	0.78333	0.041855	hypo	9
chr3	65332237	65351331	165	-0.0844896	0.698645	0.783134	0.0236077	hypo	9
chr9	127043480	127054985	213	-0.0644917	0.569842	0.634333	0.0233718	hypo	9
chr15	93612361	93622589	190	-0.0661631	0.62713	0.693293	0.0214551	hypo	9
chr18	73422330	73451979	254	-0.0467163	0.818478	0.865195	0.0202384	hypo	8
chr12	98840409	98859752	203	-0.0657079	0.805969	0.871677	0.0227522	hypo	9
chr8	128989238	129006526	176	-0.072474	0.742857	0.815331	0.0217669	hypo	9
chr7	152451404	152466935	111	-0.117643	0.600933	0.718576	0.0222054	hypo	9
chr1	15474548	15484857	180	-0.0765239	0.425536	0.50206	0.0235113	hypo	9
chr8	23525228	23544039	187	-0.0731708	0.669471	0.742642	0.0236604	hypo	9
chr9	37366255	37383875	209	-0.0782467	0.592988	0.671235	0.027927	hypo	9
chr3	178779999	178798685	208	-0.141349	0.606386	0.747735	0.0497728	hypo	7
chr14	100525725	100541128	186	-0.0683105	0.473339	0.541649	0.0217046	hypo	9
chr11	2546477	2558887	227	-0.0635177	0.685766	0.749283	0.0246326	hypo	9
chr10	22758239	22768612	163	-0.108499	0.454983	0.563482	0.0306501	hypo	9
chr1	249187677	249209308	164	-0.0869534	0.632007	0.718961	0.024395	hypo	9
chr8	82589423	82608588	188	-0.0920564	0.712623	0.804679	0.0291497	hypo	9
chr2	25433225	25445014	188	-0.0715173	0.643744	0.715261	0.02341	hypo	9
chr14	58310645	58352469	229	-0.069162	0.647581	0.716743	0.0271375	hypo	7
chr10	101406217	101423507	169	0.0786541	0.695009	0.616355	0.02282	hyper	9
chr12	46552549	46582774	177	-0.0779575	0.746582	0.82454	0.0236109	hypo	8
chr11	1903280	1919332	211	-0.0712197	0.558788	0.630008	0.0257677	hypo	9
chr10	5631706	5649088	260	-0.048355	0.791903	0.840258	0.0216161	hypo	9
chr6	27524488	27535710	224	-0.0650097	0.493651	0.558661	0.0250902	hypo	9
chr19	10663611	10674874	211	-0.10873	0.614312	0.723042	0.039812	hypo	9
chr1	10739980	10754441	189	-0.113911	0.649271	0.763182	0.0369199	hypo	9
chr12	4423625	4435022	199	-0.0909164	0.551591	0.642507	0.0312449	hypo	9
chr20	56165729	56181768	219	-0.0634712	0.710829	0.774301	0.0240537	hypo	9
chr5	36235325	36249771	150	-0.113995	0.51714	0.631136	0.0302115	hypo	9
chr2	129269239	129286863	205	-0.0596504	0.806369	0.866019	0.0211512	hypo	9
chr5	173039880	173053409	168	-0.0788895	0.630022	0.708912	0.0232375	hypo	9
chr1	7760984	7777273	164	-0.136103	0.626917	0.76302	0.0377307	hypo	9
chr7	75501226	75514764	193	-0.0657768	0.738895	0.804672	0.0219585	hypo	9
chr16	2259836	2272599	226	-0.0960436	0.529167	0.625211	0.0375211	hypo	9
chr11	102406408	102436979	189	-0.0753977	0.72798	0.803378	0.0246719	hypo	8
chr19	54481207	54495749	215	-0.101585	0.548912	0.650496	0.037972	hypo	9
chr3	128740156	128753849	191	-0.0981969	0.714713	0.81291	0.0327676	hypo	9
chr10	18727351	18747093	200	-0.0660259	0.802513	0.868539	0.0228705	hypo	9
chr1	205299706	205317795	224	-0.0668165	0.660302	0.727118	0.0262618	hypo	9
chr22	19414560	19427698	208	-0.0826677	0.418476	0.501144	0.0299621	hypo	9
chr19	1541518	1552117	214	-0.104695	0.671621	0.776317	0.0390361	hypo	9
chr1	206954876	206972860	172	-0.0788075	0.696653	0.77546	0.0237078	hypo	9
chr2	8971592	8984463	173	-0.0695984	0.780717	0.850316	0.0210406	hypo	9
chr3	33138980	33159152	219	-0.0709639	0.611695	0.682659	0.027329	hypo	9
chr10	128183205	128205354	228	-0.0542223	0.811209	0.865431	0.0216161	hypo	9
chr17	38690155	38705760	204	-0.0788225	0.701866	0.780689	0.0283332	hypo	9
chr10	97441844	97460797	186	-0.0672339	0.685476	0.75271	0.0218616	hypo	9
chr1	238093736	238116278	191	-0.0703561	0.795714	0.866071	0.0235113	hypo	9
chr9	138362142	138376346	222	-0.0732025	0.60486	0.678063	0.0286041	hypo	9
chr9	132688760	132702786	148	-0.0875294	0.798306	0.885835	0.0226865	hypo	9
chr13	27494584	27518639	240	-0.0731338	0.729855	0.802989	0.0309394	hypo	9
chr7	50174362	50200477	207	-0.0618259	0.714692	0.776518	0.0225879	hypo	9
chr11	67976611	67987966	193	-0.107394	0.46515	0.572544	0.0364683	hypo	9
chr17	58030841	58051067	229	-0.094525	0.603136	0.697661	0.0381349	hypo	9
chr18	56875533	56898895	200	-0.0868266	0.597763	0.68459	0.0301749	hypo	9
chr2	228322057	228339071	190	-0.103684	0.57365	0.677335	0.0357072	hypo	9
chr3	20215772	20242594	228	-0.0713368	0.594535	0.665872	0.0290092	hypo	9
chr18	24753153	24776474	137	-0.0829566	0.666563	0.749519	0.0200506	hypo	9
chr1	244075627	244090903	191	-0.0699539	0.649844	0.719798	0.0235815	hypo	9
chr13	25255905	25269993	182	-0.0717001	0.653246	0.724946	0.0236046	hypo	9
chr6	167361631	167372501	174	-0.103249	0.4681	0.571349	0.0318354	hypo	9
chr2	110948166	110973431	190	-0.0773297	0.639296	0.716626	0.0261492	hypo	9
chr11	102955235	102980569	203	-0.074672	0.637474	0.712146	0.0265317	hypo	9
chr13	43552052	43574251	210	-0.0680132	0.653686	0.721699	0.0251718	hypo	9
chr11	7257754	7284513	196	-0.0766463	0.552239	0.628885	0.0268575	hypo	9
chr5	123331834	123378354	249	-0.0489864	0.833665	0.882651	0.0216101	hypo	6
chr3	124293575	124313221	166	-0.0768031	0.642472	0.719275	0.0229154	hypo	9
chr7	44269984	44285311	211	-0.0585951	0.828632	0.887227	0.0219558	hypo	9
chr6	43143951	43156703	170	-0.0875168	0.672279	0.759796	0.026056	hypo	9
chr1	204478242	204489872	217	-0.0609838	0.492629	0.553613	0.0235114	hypo	9
chr15	26169374	26190298	203	-0.0620149	0.767242	0.829257	0.0223145	hypo	9
chr8	138381532	138421245	216	-0.056721	0.770683	0.827404	0.021796	hypo	8
chr3	139746580	139790667	230	-0.0536263	0.77277	0.826396	0.0219413	hypo	6
chr11	115618114	115638142	177	-0.0781888	0.716023	0.794212	0.0246326	hypo	9
chr16	87795066	87806771	181	-0.0892591	0.618816	0.708075	0.0286395	hypo	9
chr5	33935010	33946876	203	-0.0771128	0.501103	0.578216	0.0290184	hypo	9
chr8	82629446	82647167	177	-0.0732977	0.612981	0.686278	0.0232004	hypo	9
chr15	67060376	67077437	193	-0.0619368	0.81876	0.880697	0.0213518	hypo	9
chr19	53634926	53657461	217	-0.0959694	0.777421	0.87339	0.0372618	hypo	9
chr18	75344125	75368715	196	-0.0576335	0.725533	0.783167	0.0202401	hypo	9
chr9	36805173	36823649	193	-0.0677256	0.730915	0.798641	0.023444	hypo	9
chr15	31726998	31740379	205	-0.103144	0.597395	0.700539	0.0385191	hypo	9
chr10	134378990	134392611	178	-0.0697824	0.680955	0.750738	0.0222194	hypo	9
chr4	184077154	184104416	213	-0.0511464	0.821627	0.872773	0.0195167	hypo	9
chr3	157191837	157240227	212	-0.0585059	0.732439	0.790945	0.0221769	hypo	6
chr20	60910965	60922360	234	-0.0550852	0.748742	0.803827	0.023122	hypo	9
chr18	46301787	46312579	153	-0.0810518	0.716976	0.798028	0.022588	hypo	9
chr7	18522057	18557077	212	-0.0608493	0.647748	0.708597	0.0230593	hypo	8
chr5	131424117	131447339	124	-0.100011	0.681989	0.782	0.0224251	hypo	8
chr15	52849215	52865377	198	-0.0865371	0.569243	0.65578	0.0309941	hypo	9
chr8	74654978	74666268	140	-0.0894809	0.527794	0.617274	0.0225502	hypo	9
chr9	133966520	133980974	189	-0.0762327	0.715464	0.791697	0.0261093	hypo	9
chr4	111381764	111410126	218	-0.0502455	0.79615	0.846395	0.0196793	hypo	9
chr10	12077091	12090647	233	-0.0689991	0.629465	0.698464	0.0289323	hypo	9
chr7	136547701	136565289	190	-0.0978892	0.440365	0.538254	0.0333071	hypo	9
chr19	13968986	13982910	201	-0.111887	0.569918	0.681805	0.040457	hypo	9
chr11	118658479	118672842	204	-0.0776644	0.455045	0.532709	0.028609	hypo	9
chr8	56005447	56024335	116	-0.145107	0.467867	0.612975	0.0315301	hypo	7
chr14	35804293	35817657	205	-0.0624517	0.732075	0.794526	0.0230417	hypo	9
chr9	112804066	112817536	179	-0.135911	0.462032	0.597944	0.0433623	hypo	9
chr13	56527475	56566178	207	-0.0666778	0.786608	0.853286	0.0248694	hypo	8
chr3	194982811	194993276	207	-0.114843	0.424827	0.53967	0.0434359	hypo	9
chr12	58008183	58021670	221	-0.0593474	0.299314	0.358661	0.0237636	hypo	9
chr2	1608422	1623587	200	-0.0605446	0.701541	0.762086	0.0218355	hypo	9
chr5	68384528	68398612	184	-0.0794151	0.635477	0.714892	0.0264016	hypo	9
chr10	27380445	27394224	173	-0.103555	0.657722	0.761276	0.0323788	hypo	9
chr21	34768837	34780703	199	-0.0736387	0.483498	0.557137	0.0264334	hypo	9
chr2	21009486	21034780	172	-0.0726503	0.610627	0.683277	0.0227367	hypo	9
chr12	132426629	132438276	214	-0.099352	0.640692	0.740044	0.0382543	hypo	9
chr10	71807643	71819863	172	-0.108513	0.471488	0.58	0.03419	hypo	9
chr1	17681143	17698759	225	-0.0574523	0.794645	0.852097	0.0235113	hypo	9
chr1	41314987	41328515	200	-0.0708565	0.576088	0.646944	0.0259465	hypo	9
chr7	23239239	23257425	164	-0.0869478	0.786379	0.873327	0.0256576	hypo	9
chr2	219118075	219134309	219	-0.0713211	0.752942	0.824263	0.0283522	hypo	9
chr2	27640144	27652061	172	-0.086569	0.708119	0.794688	0.0281134	hypo	9
chr11	35632645	35645655	142	-0.162822	0.377241	0.540063	0.0424177	hypo	6
chr11	47266761	47277509	160	-0.0855265	0.704025	0.789552	0.0249985	hypo	9
chr15	101660702	101676426	232	-0.0503823	0.62531	0.675693	0.0213518	hypo	9
chr14	22523384	22560034	204	-0.0616148	0.621391	0.683005	0.0230405	hypo	8
chr2	198108688	198134231	183	-0.0671616	0.7082	0.775362	0.0224684	hypo	9
chr21	45968341	45984741	154	-0.0759196	0.741457	0.817377	0.0213768	hypo	9
chr14	56578014	56594466	146	-0.17042	0.369005	0.539425	0.0454511	hypo	4
chr4	124312197	124323683	181	-0.0722265	0.357252	0.429479	0.0239507	hypo	9
chr15	78323374	78344292	188	-0.0715283	0.68464	0.756169	0.0249429	hypo	9
chr12	50893661	50905869	156	-0.10728	0.526206	0.633486	0.0304445	hypo	9
chr13	49070182	49089132	193	-0.0577898	0.769781	0.827571	0.0206225	hypo	9
chr4	122734187	122756434	180	-0.0895496	0.565804	0.655354	0.0298818	hypo	9
chr3	52799919	52813859	195	-0.0624528	0.68079	0.743242	0.0223407	hypo	9
chr13	109803522	109820957	209	-0.0511424	0.764454	0.815597	0.0196768	hypo	9
chr2	99082657	99102055	188	-0.0613777	0.710535	0.771912	0.0213215	hypo	9
chr10	6712358	6736696	223	-0.0526224	0.773918	0.82654	0.0216319	hypo	9
chr7	158761265	158775852	186	-0.083529	0.707107	0.790636	0.028506	hypo	9
chr17	3622190	3633477	192	-0.0766677	0.628158	0.704826	0.027202	hypo	9
chr17	10627626	10638778	163	-0.102674	0.598993	0.701667	0.0306981	hypo	9
chr5	179118801	179129511	172	-0.0869021	0.493545	0.580447	0.0274025	hypo	9
chr9	132488571	132502814	222	-0.0578303	0.732699	0.79053	0.0236809	hypo	9
chr7	128088435	128104696	185	-0.120301	0.579533	0.699834	0.0407372	hypo	9
chr10	102483961	102498545	219	-0.071098	0.238311	0.309409	0.0286434	hypo	9
chr1	21897387	21910624	193	-0.070566	0.732404	0.80297	0.025377	hypo	9
chr9	95049077	95060978	150	0.138648	0.598216	0.459569	0.038926	hyper	9
chr2	158274387	158301252	180	-0.0630059	0.603544	0.666549	0.0210406	hypo	9
chr2	10824712	10837286	186	-0.0822143	0.619383	0.701597	0.0281588	hypo	9
chr16	2384932	2396981	160	-0.105888	0.543541	0.64943	0.0316468	hypo	9
chr4	23332237	23368593	207	-0.0507205	0.784054	0.834775	0.0195167	hypo	8
chr14	105019924	105034546	234	-0.052375	0.667655	0.72003	0.0227641	hypo	9
chr8	99431243	99447362	180	-0.0840406	0.617839	0.701879	0.0278921	hypo	9
chr8	92811562	92864314	230	-0.0507637	0.792343	0.843107	0.0217581	hypo	6
chr7	130692936	130710392	176	-0.0731427	0.676094	0.749237	0.0242212	hypo	9
chr1	107593394	107607424	164	-0.0767651	0.636953	0.713718	0.0235113	hypo	9
chr14	78623421	78645600	203	-0.0609002	0.7491	0.81	0.023039	hypo	9
chr9	34169034	34185151	198	-0.0728489	0.707034	0.779883	0.0268577	hypo	9
chr20	34646410	34662735	207	-0.0740567	0.667334	0.74139	0.0285037	hypo	9
chr14	105428911	105440759	198	-0.0669725	0.677772	0.744744	0.0249926	hypo	9
chr20	31337471	31353193	215	-0.0581074	0.705226	0.763333	0.0234896	hypo	9
chr14	31917364	31930979	161	-0.0730163	0.641226	0.714242	0.0221322	hypo	9
chr1	202926092	202942390	171	-0.0803169	0.556677	0.636994	0.0260716	hypo	9
chr17	6945648	6956376	197	-0.0735157	0.500933	0.574448	0.027202	hypo	9
chr10	96111323	96126950	181	-0.0759278	0.639607	0.715535	0.0259278	hypo	9
chr17	17655324	17667943	177	-0.0938164	0.519575	0.613391	0.0316539	hypo	9
chr4	3038908	3050633	216	-0.0765389	0.525994	0.602533	0.0315287	hypo	9
chr9	71780991	71794388	165	-0.0913993	0.510849	0.602248	0.0279161	hypo	9
chr5	149540415	149558804	199	-0.0666866	0.723518	0.790204	0.0248457	hypo	9
chr3	126187573	126201070	179	-0.104205	0.593161	0.697366	0.0345827	hypo	9
chr9	33124233	33143465	217	-0.0553911	0.65687	0.712261	0.0226901	hypo	9
chr20	48219051	48233606	190	-0.0644724	0.685981	0.750454	0.0231514	hypo	9
chr14	104585352	104601496	155	-0.0895806	0.488175	0.577755	0.0268882	hypo	9
chr13	44442142	44463696	143	-0.0999216	0.602756	0.702678	0.0267418	hypo	9
chr5	88581353	88621826	192	-0.0594704	0.775766	0.835237	0.0216101	hypo	7
chr2	218912561	218939824	241	-0.0580641	0.767934	0.825998	0.0266145	hypo	9
chr17	56767096	56782446	237	-0.0606295	0.765077	0.825707	0.027202	hypo	9
chr11	105929182	105951315	208	-0.0806881	0.587893	0.668581	0.0316405	hypo	9
chr1	15902127	15916017	197	-0.0937345	0.726063	0.819797	0.0349729	hypo	9
chr16	4580796	4594218	196	-0.0713257	0.679702	0.751028	0.0265496	hypo	9
chr17	15841806	15852125	142	-0.101019	0.544514	0.645533	0.0272677	hypo	9
chr10	92959746	92987457	186	-0.0614295	0.613382	0.674812	0.0217015	hypo	9
chr9	129408200	129421852	171	-0.0754905	0.62219	0.697681	0.0248	hypo	9
chr13	110353043	110367349	164	-0.0666311	0.651126	0.717758	0.0207041	hypo	9
chr2	131590003	131603503	227	-0.0667279	0.709141	0.775868	0.0288973	hypo	9
chr4	483426	499698	224	-0.100089	0.643644	0.743733	0.0425119	hypo	9
chr4	7468112	7482485	215	-0.0609996	0.729679	0.790679	0.0250113	hypo	9
chr20	43157318	43171645	176	-0.0764913	0.713361	0.789853	0.0260082	hypo	9
chr9	129560979	129574848	195	-0.0609846	0.649698	0.710683	0.0226879	hypo	9
chr3	127098040	127117501	200	-0.0577172	0.760519	0.818236	0.0220941	hypo	9
chr2	165586956	165618553	196	-0.0561962	0.770145	0.826342	0.0210406	hypo	8
chr3	9947458	9962676	156	-0.088088	0.650011	0.738099	0.0265215	hypo	9
chr1	234354663	234373687	229	-0.0538136	0.747086	0.800899	0.0235656	hypo	9
chr9	134111693	134123840	208	-0.0569719	0.688806	0.745778	0.0226865	hypo	9
chr3	39088032	39104640	146	-0.0907715	0.608846	0.699617	0.0257753	hypo	9
chr2	207486416	207513527	212	-0.0573107	0.70304	0.760351	0.0233653	hypo	9
chr15	38408470	38447379	173	-0.0644123	0.795026	0.859439	0.0213538	hypo	8
chr7	5545110	5556895	212	-0.0540286	0.761469	0.815498	0.0219556	hypo	9
chr18	64363954	64408174	214	-0.048959	0.802826	0.851785	0.0201019	hypo	6
chr13	51634572	51654963	139	-0.0815682	0.691775	0.773343	0.0216609	hypo	9
chr4	5907111	5927222	204	-0.0499232	0.728862	0.778786	0.0195521	hypo	9
chr2	9275444	9289073	215	-0.052745	0.727943	0.780688	0.021812	hypo	9
chr9	132744227	132756757	159	-0.0810582	0.609259	0.690317	0.0247581	hypo	9
chr10	134897131	134909556	196	-0.0828505	0.657889	0.740739	0.0306534	hypo	9
chr12	95461889	95474532	155	-0.102632	0.602955	0.705587	0.0306191	hypo	9
chr8	146074079	146084726	141	0.0820999	0.675372	0.593272	0.0222749	hyper	9
chr8	145689829	145700735	163	-0.0989155	0.274542	0.373457	0.032291	hypo	9
chr7	127899221	127916143	198	-0.0582911	0.724025	0.782316	0.0222321	hypo	9
chr2	238483478	238500440	222	-0.0526281	0.768113	0.820741	0.0225786	hypo	9
chr14	105525484	105536314	213	-0.0830464	0.477915	0.560961	0.03442	hypo	9
chr20	30917443	30939489	206	-0.0598367	0.789889	0.849726	0.023916	hypo	9
chr2	134138739	134177210	214	-0.0509634	0.788098	0.839062	0.0210406	hypo	8
chr3	71263592	71280167	170	-0.0672338	0.794234	0.861468	0.0220992	hypo	9
chr1	152137148	152167638	183	-0.067863	0.604913	0.672776	0.02406	hypo	8
chr8	95232090	95249384	216	-0.0524018	0.763579	0.815981	0.0218764	hypo	9
chr3	128511889	128529486	160	-0.0732627	0.787316	0.860579	0.0227929	hypo	9
chr2	139514054	139547626	209	-0.0793925	0.618911	0.698304	0.0320821	hypo	8
chr3	13037090	13054135	187	-0.0915007	0.494572	0.586073	0.0339733	hypo	9
chr6	4010521	4021934	200	-0.0846747	0.394242	0.478916	0.0323564	hypo	9
chr11	68058496	68082487	236	-0.0676338	0.680687	0.74832	0.0310294	hypo	9
chr2	242545961	242556993	183	-0.0621064	0.84086	0.902967	0.0219763	hypo	9
chr6	53654350	53664766	155	-0.08266	0.427053	0.509713	0.0252764	hypo	9
chr7	142486729	142497552	172	-0.0681529	0.554476	0.622629	0.0228666	hypo	9
chr2	113453419	113470391	178	-0.0613864	0.712161	0.773547	0.0212131	hypo	9
chr2	66026678	66063610	207	-0.0523677	0.830169	0.882537	0.0210406	hypo	8
chr15	74056067	74078669	187	-0.0618022	0.784961	0.846763	0.0223965	hypo	9
chr6	110491473	110504110	150	-0.112257	0.428779	0.541037	0.0332786	hypo	9
chr20	61883216	61895726	199	-0.0923756	0.527489	0.619865	0.0357474	hypo	9
chr2	74201432	74213244	165	-0.0902875	0.477157	0.567445	0.0293721	hypo	9
chr1	181277028	181293004	166	-0.0742012	0.484997	0.559198	0.0240148	hypo	9
chr21	34593258	34610692	158	-0.1262	0.495856	0.622056	0.0386458	hypo	9
chr5	70748116	70764713	193	-0.0579527	0.703131	0.761084	0.0218566	hypo	9
chr4	183365338	183378058	143	-0.0826389	0.55799	0.640629	0.0232624	hypo	9
chr6	111401540	111416704	149	-0.114299	0.545727	0.660026	0.0332468	hypo	9
chr5	97722480	97779295	227	-0.0487816	0.796109	0.84489	0.0216101	hypo	6
chr14	104543214	104556077	187	-0.0612595	0.715592	0.776851	0.0223426	hypo	9
chr1	63245397	63267367	200	-0.0702867	0.655575	0.725861	0.0276896	hypo	9
chr5	112934733	112982908	214	-0.0516797	0.770918	0.822598	0.0216101	hypo	6
chr20	4205487	4223454	175	-0.0934253	0.650756	0.744181	0.0328904	hypo	9
chr17	3592279	3603055	198	-0.0798077	0.466413	0.546221	0.0308584	hypo	9
chr2	150173219	150193638	164	-0.0832138	0.516222	0.599435	0.0266326	hypo	9
chr2	65602823	65620127	186	-0.0852534	0.588992	0.674246	0.0311025	hypo	9
chr15	78723954	78739409	162	-0.0672789	0.61604	0.683319	0.0213518	hypo	9
chr21	44911972	44924986	219	-0.0491145	0.853706	0.902821	0.0210946	hypo	9
chr1	9677130	9690162	200	-0.132273	0.526059	0.658332	0.0512871	hypo	9
chr1	89980771	90005072	195	-0.143598	0.601873	0.745471	0.0542493	hypo	4
chr1	12215320	12229740	189	-0.0822203	0.583717	0.665938	0.0305996	hypo	9
chr19	52669849	52682397	202	-0.12187	0.707589	0.82946	0.0484279	hypo	9
chr12	6597381	6609893	165	-0.131857	0.51686	0.648717	0.0428021	hypo	9
chr13	70099175	70133919	195	-0.0514419	0.785367	0.836809	0.0197487	hypo	8
chr6	125678824	125701660	200	-0.0636637	0.701023	0.764687	0.0252698	hypo	9
chr1	3365451	3377144	176	-0.0706957	0.668558	0.739254	0.0244635	hypo	9
chr1	244608806	244624521	161	-0.120291	0.429043	0.549333	0.0397649	hypo	9
chr4	54749421	54775222	205	-0.048593	0.755014	0.803607	0.0196562	hypo	9
chr10	126403184	126416729	182	-0.063977	0.674008	0.737985	0.0231378	hypo	9
chr14	51858041	51892220	179	-0.0632403	0.820704	0.883945	0.0224723	hypo	8
chr10	118754870	118773974	197	-0.0906729	0.672791	0.763464	0.035373	hypo	9
chr18	457806	477750	196	-0.0529906	0.765287	0.818278	0.0205107	hypo	9
chr11	94963002	94979609	176	-0.0775813	0.403051	0.480633	0.0267769	hypo	9
chr14	101124622	101138965	227	-0.0487487	0.719066	0.767815	0.0219181	hypo	9
chr2	106769935	106792553	230	-0.048724	0.692964	0.741688	0.0221243	hypo	9
chr11	125622778	125666465	225	-0.0551994	0.753879	0.809078	0.0246326	hypo	7
chr7	140090910	140105974	208	-0.0531794	0.689852	0.743031	0.0219556	hypo	9
chr2	88920643	88934194	169	-0.124391	0.471799	0.59619	0.0413031	hypo	9
chr5	39537849	39567580	188	-0.0578686	0.780924	0.838793	0.0216101	hypo	8
chr14	96820528	96836517	167	-0.135438	0.475919	0.611357	0.0449587	hypo	9
chr12	53606430	53620647	224	-0.0812778	0.402268	0.483546	0.0361815	hypo	9
chr3	132937475	132989025	224	-0.0481016	0.837137	0.885238	0.0214414	hypo	6
chr2	75136685	75155497	203	-0.055106	0.750885	0.805991	0.0222707	hypo	9
chr10	93164017	93183985	153	-0.0786016	0.62377	0.702372	0.0239185	hypo	9
chr12	11318696	11349963	207	-0.0858134	0.650006	0.735819	0.0362086	hypo	8
chr13	78999510	79034605	196	-0.0503714	0.773908	0.82428	0.0196768	hypo	8
chr4	7369389	7383267	240	-0.0427252	0.735789	0.778514	0.0204684	hypo	9
chr4	122663439	122690980	184	-0.0862997	0.701901	0.788201	0.0311046	hypo	8
chr1	40423553	40442545	196	-0.0625546	0.774705	0.83726	0.0244799	hypo	9
chr7	149377378	149398114	183	-0.0801582	0.681321	0.761479	0.0290817	hypo	9
chr2	100750326	100764404	138	-0.0861834	0.614691	0.700875	0.0238874	hypo	9
chr17	46182784	46193235	181	-0.0755213	0.360059	0.43558	0.0272895	hypo	9
chr13	20704515	20717191	158	0.0683289	0.646455	0.578126	0.0218744	hyper	9
chr11	69644621	69661882	196	-0.0644464	0.707745	0.772191	0.0252039	hypo	9
chr2	27276903	27293123	188	-0.088433	0.656641	0.745074	0.0336582	hypo	9
chr14	60841405	60888072	215	-0.0505384	0.842667	0.893205	0.0217318	hypo	6
chr3	136534330	136546301	160	-0.111086	0.523345	0.634431	0.0365551	hypo	9
chr19	50936038	50952140	215	-0.0879811	0.708198	0.796179	0.0379449	hypo	9
chr4	122289381	122307924	146	-0.0667548	0.638252	0.705007	0.0195167	hypo	9
chr1	151163921	151174262	187	-0.0732866	0.510312	0.583599	0.0275118	hypo	9
chr19	47733484	47747817	216	-0.0856177	0.412255	0.497873	0.0370708	hypo	9
chr6	90667919	90686713	171	-0.0657158	0.824877	0.890593	0.0225399	hypo	9
chr15	84706517	84767277	172	-0.0713184	0.73437	0.805689	0.0245525	hypo	3
chr13	34348498	34370810	147	-0.0686105	0.722629	0.79124	0.0203073	hypo	9
chr7	73691427	73705440	189	-0.0704093	0.604139	0.674548	0.0270442	hypo	9
chr12	9813307	9839077	156	-0.0762248	0.652603	0.728828	0.0241589	hypo	9
chr13	46742475	46758488	149	-0.0762996	0.306335	0.382634	0.023314	hypo	9
chr16	30438145	30448949	172	0.0797074	0.743161	0.663453	0.0275918	hyper	9
chr8	11350054	11365032	175	-0.0788415	0.481089	0.559931	0.0280556	hypo	9
chr14	68131476	68149210	179	-0.116413	0.620702	0.737115	0.0421949	hypo	9
chr2	113516933	113530317	162	0.0844945	0.675064	0.59057	0.0275828	hyper	9
chr12	111508306	111528170	211	-0.0551941	0.812757	0.867951	0.0234772	hypo	9
chr7	28888388	28904626	163	-0.0714174	0.721321	0.792739	0.0234052	hypo	9
chr15	64167436	64187097	192	-0.072058	0.722482	0.79454	0.0277478	hypo	9
chr6	56400181	56432841	185	-0.0605235	0.711532	0.772055	0.0225988	hypo	8
chr1	114292040	114311767	206	-0.0846429	0.513809	0.598452	0.0351885	hypo	9
chr4	112650892	112693794	203	-0.0476091	0.805463	0.853072	0.0195167	hypo	7
chr12	132305317	132316332	224	-0.0808158	0.50269	0.583506	0.03651	hypo	9
chr2	9683350	9696997	187	-0.0761058	0.514332	0.590438	0.0290716	hypo	9
chr1	235988361	236018722	170	-0.0700325	0.856982	0.927015	0.0241169	hypo	8
chr18	2565626	2577939	156	0.0638247	0.653864	0.59004	0.0201452	hyper	9
chr2	24149945	24162441	164	-0.0920753	0.525807	0.617882	0.0316401	hypo	9
chr6	27551817	27564060	173	0.064372	0.544877	0.480505	0.0225479	hyper	9
chr15	93569269	93580092	184	-0.0573246	0.732305	0.789629	0.0213518	hypo	9
chr3	13060215	13074472	209	-0.05894	0.627638	0.686578	0.0249667	hypo	9
chr4	32315078	32351928	186	-0.0517886	0.799365	0.851154	0.0195167	hypo	8
chr14	54422160	54437528	185	-0.0831851	0.481165	0.56435	0.0312551	hypo	9
chr6	160108179	160121671	179	-0.127987	0.462456	0.590444	0.0460906	hypo	9
chr16	24256467	24284493	184	-0.0728824	0.687314	0.760196	0.02736	hypo	8
chr14	105286598	105298415	185	-0.0760995	0.615544	0.691643	0.0289352	hypo	9
chr2	207313195	207335480	149	-0.0917586	0.641119	0.732878	0.0284315	hypo	9
chr7	75860171	75874074	175	-0.0620906	0.691712	0.753803	0.0221613	hypo	9
chr15	48236455	48270147	212	-0.0494713	0.786329	0.835801	0.0213518	hypo	8
chr2	201987962	202001641	100	-0.103458	0.438654	0.542112	0.0210609	hypo	9
chr10	23621947	23638888	165	-0.105767	0.679093	0.78486	0.0354092	hypo	9
chr5	176216964	176231656	197	-0.0566143	0.666066	0.722681	0.0228753	hypo	9
chr1	211994007	212009460	123	-0.0963873	0.645142	0.741529	0.0241226	hypo	9
chr3	131845645	131900083	200	-0.052581	0.763239	0.81582	0.0214414	hypo	6
chr15	38893773	38918855	212	-0.0493701	0.866929	0.916299	0.0213518	hypo	9
chr2	234272320	234286533	164	-0.0722282	0.791649	0.863877	0.0243236	hypo	9
chr12	69711170	69737206	181	-0.0615606	0.7739	0.835461	0.0227526	hypo	9
chr2	220063609	220077404	198	-0.0900184	0.646403	0.736421	0.0367391	hypo	9
chr10	12157632	12171320	191	-0.0699269	0.670814	0.740741	0.0273707	hypo	9
chr12	131619514	131631697	192	-0.0582054	0.743011	0.801217	0.0228655	hypo	9
chr10	135067726	135081714	214	-0.0607322	0.619489	0.680221	0.0266019	hypo	9
chr9	100872929	100888562	160	-0.0789066	0.662166	0.741072	0.0258093	hypo	9
chr4	139667153	139703958	204	-0.0466456	0.823294	0.86994	0.0195167	hypo	8
chr4	36240595	36262951	185	-0.0851631	0.566353	0.651516	0.0324746	hypo	9
chr3	197670292	197680892	199	-0.054447	0.63162	0.686067	0.0223133	hypo	9
chr12	1706227	1718564	178	-0.0621791	0.604227	0.666406	0.0227522	hypo	9
chr19	52833927	52847713	204	-0.0879921	0.668152	0.756144	0.0369204	hypo	9
chr10	90957054	90971012	181	-0.0824736	0.509114	0.591588	0.0306771	hypo	9
chr21	43633218	43643507	162	-0.0823716	0.604511	0.686883	0.0275623	hypo	9
chr5	177504668	177517274	177	-0.0595686	0.755398	0.814967	0.0216902	hypo	9
chr12	64778461	64790593	165	-0.0887385	0.725103	0.813842	0.030138	hypo	9
chr3	111830339	111851629	151	-0.0702528	0.568637	0.63889	0.0219583	hypo	9
chr16	56756198	56772137	163	-0.0950532	0.627859	0.722912	0.0319467	hypo	9
chr2	182160706	182198055	159	-0.0682675	0.660612	0.728879	0.0224022	hypo	8
chr10	104943291	104955625	199	-0.0604825	0.563767	0.624249	0.0249931	hypo	9
chr6	129687139	129717978	188	-0.0591262	0.799004	0.85813	0.0230195	hypo	8
chr4	113196331	113213292	200	-0.103763	0.459986	0.563749	0.0428025	hypo	9
chr12	50556219	50567558	151	-0.0735668	0.680482	0.754048	0.0229647	hypo	9
chr9	135746589	135757347	188	-0.0592707	0.568668	0.627939	0.0230668	hypo	9
chr10	70314091	70328500	191	-0.0733535	0.520637	0.59399	0.0292393	hypo	9
chr15	27208866	27227103	204	-0.0596169	0.591064	0.650681	0.0252927	hypo	9
chr5	159790208	159807884	165	-0.0912615	0.706502	0.797763	0.0309446	hypo	9
chr5	172885675	172905854	186	-0.0560032	0.797827	0.85383	0.0216101	hypo	9
chr2	64745038	64757013	149	0.0772726	0.4531	0.375828	0.0242755	hyper	9
chr5	1296054	1310335	177	-0.0605147	0.662554	0.723069	0.0223635	hypo	9
chr1	223249723	223265040	196	-0.0577058	0.808398	0.866103	0.0235113	hypo	9
chr10	133480329	133492602	187	-0.0572897	0.657183	0.714473	0.0223026	hypo	9
chr18	42852532	42876518	180	-0.053553	0.838308	0.891862	0.0200453	hypo	9
chr9	104239708	104260755	136	-0.0995624	0.595618	0.69518	0.0288864	hypo	9
chr10	111381072	111428438	224	-0.0464971	0.742247	0.788744	0.0216781	hypo	6
chr12	65661089	65687149	167	-0.0670243	0.612108	0.679132	0.0233383	hypo	9
chr3	112208129	112235488	123	-0.106006	0.592424	0.69843	0.0268957	hypo	8
chr5	138760139	138777053	177	-0.0697375	0.783042	0.852779	0.0260901	hypo	9
chr15	101865671	101880582	213	-0.0487165	0.796049	0.844765	0.0216228	hypo	9
chr8	137183636	137221783	201	-0.0553033	0.798808	0.854111	0.0231199	hypo	8
chr20	5289229	5302068	183	-0.0802749	0.485872	0.566147	0.0306068	hypo	9
chr11	132947879	132959572	156	-0.0813426	0.64293	0.724273	0.0266373	hypo	9
chr7	142690454	142715934	197	-0.0533641	0.786229	0.839593	0.0219556	hypo	9
chr3	107926114	107948014	163	-0.0710179	0.571903	0.64292	0.0245363	hypo	9
chr11	45038290	45058523	179	-0.0678182	0.75234	0.820158	0.0253597	hypo	9
chr6	74979344	75031529	227	-0.0474724	0.787591	0.835063	0.0225288	hypo	6
chr21	45866327	45880955	224	-0.0673647	0.713723	0.781087	0.0316243	hypo	9
chr2	3244946	3258616	179	-0.0797246	0.695931	0.775656	0.0300886	hypo	9
chr3	31979349	32004700	193	-0.0534346	0.672641	0.726076	0.0216033	hypo	9
chr15	29141300	29156090	188	-0.0592665	0.842311	0.901578	0.0236164	hypo	9
chr13	21340688	21358995	178	-0.102867	0.656887	0.759754	0.0378045	hypo	9
chr18	13255997	13269502	183	-0.0522652	0.783378	0.835643	0.0200453	hypo	9
chr16	48269105	48284550	164	-0.112667	0.586919	0.699586	0.0385666	hypo	9
chr6	224798	235249	165	-0.0733999	0.746269	0.819669	0.0254551	hypo	9
chr20	5100372	5110916	193	-0.0585801	0.379173	0.437753	0.0237149	hypo	9
chr7	5565630	5576133	197	-0.0962001	0.342634	0.438834	0.04004	hypo	9
chr3	37210263	37221813	134	-0.091575	0.376397	0.467972	0.0261912	hypo	9
chr5	89817240	89834022	142	-0.0746092	0.690135	0.764745	0.0222747	hypo	9
chr8	14322888	14352498	203	-0.0515782	0.708675	0.760254	0.0219853	hypo	8
chr7	22595873	22612254	161	-0.0674329	0.606762	0.674195	0.0229267	hypo	9
chr20	57871286	57886479	180	-0.063979	0.693844	0.757823	0.0241771	hypo	9
chr9	21541980	21568702	176	-0.0756774	0.646767	0.722445	0.0278901	hypo	9
chr8	124075443	124089650	153	-0.105689	0.599468	0.705157	0.0345269	hypo	9
chr11	57093286	57107144	193	-0.0662124	0.658767	0.724979	0.0268733	hypo	9
chr4	84715441	84762844	225	-0.0418873	0.805809	0.847697	0.0198456	hypo	6
chr5	132971131	133004203	214	-0.0483438	0.788447	0.836791	0.0217677	hypo	8
chr1	113256701	113268361	174	-0.0655162	0.415038	0.480554	0.023999	hypo	9
chr6	1395234	1406044	145	-0.0769727	0.549654	0.626626	0.0235344	hypo	9
chr2	40660239	40685831	182	-0.0734024	0.658694	0.732096	0.0277958	hypo	9
chr14	107242979	107259246	190	-0.0851025	0.484619	0.569722	0.0340657	hypo	9
chr11	18649487	18660014	181	-0.10495	0.531408	0.636357	0.0399383	hypo	9
chr2	152105268	152119452	157	-0.0801175	0.6681	0.748218	0.0270146	hypo	9
chr15	65685814	65697352	160	-0.0631058	0.622912	0.686018	0.0213812	hypo	9
chr12	114130918	114152520	205	-0.052416	0.745764	0.79818	0.0227522	hypo	9
chr2	159633724	159657646	197	-0.0523034	0.824775	0.877078	0.0218248	hypo	9
chr4	34154447	34195877	169	-0.0545219	0.798748	0.85327	0.0195167	hypo	8
chr10	82454789	82472226	173	-0.0589682	0.798413	0.857381	0.0216161	hypo	9
chr2	95663668	95678620	177	-0.0567321	0.748555	0.805287	0.0213123	hypo	9
chr7	39651765	39671527	174	-0.0597251	0.612668	0.672393	0.0220376	hypo	9
chr9	35658338	35670071	181	-0.0665924	0.461356	0.527948	0.0257914	hypo	9
chr13	21514630	21525061	133	-0.0785351	0.703363	0.781898	0.0219817	hypo	9
chr1	179047311	179058699	161	-0.0785394	0.574632	0.653172	0.0268981	hypo	9
chr12	111116114	111130461	155	-0.0924736	0.49174	0.584214	0.0316248	hypo	9
chr5	156266531	156300138	173	-0.0587645	0.793915	0.85268	0.0216101	hypo	8
chr4	85880829	85902088	168	-0.0932355	0.607632	0.700868	0.0331716	hypo	9
chr1	108009867	108033366	165	-0.066971	0.782791	0.849762	0.0235113	hypo	9
chr15	75190273	75202834	153	-0.132374	0.556753	0.689127	0.0424692	hypo	9
chr10	12394884	12406387	164	-0.0967381	0.704219	0.800957	0.0344822	hypo	9
chr5	68713626	68730809	194	-0.0542153	0.834381	0.888596	0.0224847	hypo	9
chr8	1731919	1747670	191	-0.0534895	0.849697	0.903187	0.0217581	hypo	9
chr2	178924068	178949453	160	-0.0688255	0.700763	0.769588	0.0234389	hypo	9
chr9	34992165	35003358	100	-0.137663	0.573436	0.711099	0.0293883	hypo	9
chr1	70674163	70690898	157	-0.0799887	0.579853	0.659842	0.026721	hypo	9
chr8	35086350	35107024	153	-0.0939275	0.63693	0.730858	0.030491	hypo	9
chr7	111186976	111213784	167	-0.0771362	0.67584	0.752976	0.0276228	hypo	9
chr5	118604619	118623223	147	-0.0860977	0.464482	0.55058	0.0274252	hypo	9
chr21	46504350	46520700	207	-0.0484057	0.796986	0.845391	0.0214151	hypo	9
chr22	46061910	46078227	154	-0.155439	0.586665	0.742104	0.0506225	hypo	5
chr3	44542092	44561887	188	-0.0855396	0.661584	0.747123	0.0347192	hypo	9
chr16	19527290	19538498	185	-0.101543	0.317493	0.419036	0.0401883	hypo	9
chr1	205449749	205464684	172	-0.066056	0.668308	0.734364	0.0244384	hypo	9
chr1	152480385	152502786	166	-0.066222	0.671743	0.737965	0.0235113	hypo	9
chr8	29347599	29365228	151	-0.0785179	0.75368	0.832197	0.025848	hypo	9
chr11	59513756	59527099	197	-0.109915	0.527482	0.637397	0.0464912	hypo	9
chr21	16227985	16255063	145	-0.0679122	0.741861	0.809773	0.0210946	hypo	8
chr5	32571906	32587592	184	-0.0587262	0.523983	0.582709	0.0232062	hypo	9
chr14	50988384	51003068	150	-0.0680558	0.495626	0.563682	0.021896	hypo	9
chr13	41832540	41852632	172	-0.0560637	0.753896	0.809959	0.0206387	hypo	9
chr3	53781271	53792501	151	-0.0860318	0.712175	0.798207	0.0276527	hypo	9
chr1	117094912	117117028	178	-0.0995901	0.465787	0.565377	0.0374392	hypo	9
chr20	44024947	44043082	142	-0.0756352	0.533918	0.609553	0.0230649	hypo	9
chr2	23339585	23364710	214	-0.0458116	0.777079	0.82289	0.0210481	hypo	9
chr16	9095929	9107842	202	-0.0672875	0.727904	0.795191	0.0293134	hypo	9
chr17	16181710	16196734	161	-0.103164	0.611217	0.714381	0.0358508	hypo	9
chr13	41055075	41071012	207	-0.0441534	0.823507	0.86766	0.0196768	hypo	9
chr15	63494998	63512582	166	-0.0604425	0.785929	0.846371	0.0216474	hypo	9
chr17	58158345	58183943	181	-0.0847129	0.58327	0.667983	0.0334609	hypo	9
chr12	66131937	66146710	132	-0.0850283	0.636129	0.721157	0.0243969	hypo	9
chr4	7281041	7291687	199	-0.0453412	0.745838	0.79118	0.0195167	hypo	9
chr2	183892386	183919326	139	-0.0711727	0.620395	0.691568	0.0214171	hypo	8
chr11	7848885	7882653	206	-0.0551581	0.772126	0.827284	0.0246438	hypo	8
chr1	48046169	48067960	177	-0.0831691	0.704855	0.788024	0.0316868	hypo	9
chr4	55133415	55150331	130	-0.0691453	0.772386	0.841531	0.0195167	hypo	9
chr14	24659877	24671231	190	-0.0565878	0.58282	0.639408	0.0234432	hypo	9
chr2	201522687	201545465	170	-0.0578295	0.784685	0.842515	0.0213458	hypo	9
chr4	74972920	75021067	207	-0.0481281	0.753082	0.80121	0.0217017	hypo	6
chr18	48675057	48688611	161	-0.0716128	0.617292	0.688905	0.0252331	hypo	9
chr4	156368451	156407536	199	-0.0515417	0.826543	0.878085	0.0222323	hypo	8
chr2	143617741	143641009	158	-0.0612004	0.800948	0.862149	0.0210406	hypo	9
chr2	25339924	25352958	192	-0.0503577	0.800968	0.851325	0.0210406	hypo	9
chr2	95820037	95831296	141	-0.10427	0.510322	0.614592	0.0327009	hypo	9
chr7	45465027	45494811	201	-0.0501528	0.800659	0.850812	0.0219573	hypo	8
chr2	67858193	67897940	199	-0.0485411	0.775106	0.823647	0.0210406	hypo	8
chr7	143067924	143081287	152	-0.0671099	0.622194	0.689304	0.0223144	hypo	9
chr6	27115402	27129173	156	-0.0686583	0.494726	0.563385	0.0234012	hypo	9
chr14	102022947	102036474	199	-0.0504262	0.379151	0.429577	0.0219101	hypo	9
chr8	70399292	70416662	167	-0.0610763	0.727563	0.788639	0.0223655	hypo	9
chr12	50091449	50106360	177	-0.140819	0.436301	0.57712	0.0544705	hypo	9
chr3	19653239	19713969	212	-0.0462407	0.844603	0.890843	0.0214414	hypo	5
chr3	40341800	40360259	167	-0.104405	0.576886	0.68129	0.0379346	hypo	9
chr2	43821547	43832831	167	-0.0620251	0.625516	0.687541	0.0226579	hypo	9
chr4	61446546	61490011	202	-0.0441149	0.810539	0.854654	0.019517	hypo	7
chr11	58678914	58704112	146	-0.0797456	0.669442	0.749187	0.0254967	hypo	9
chr10	50873720	50894849	150	-0.0678919	0.634693	0.702585	0.0224162	hypo	9
chr2	231683534	231693662	149	-0.0912426	0.741543	0.832786	0.0305179	hypo	9
chr5	148730396	148743697	136	-0.0793503	0.614908	0.694258	0.0237549	hypo	9
chr8	123637527	123663896	187	-0.0538505	0.810497	0.864348	0.0221157	hypo	9
chr3	10617115	10637338	183	-0.0533575	0.7418	0.795158	0.0214414	hypo	9
chr15	41042660	41055045	207	-0.0738373	0.537861	0.611698	0.0336821	hypo	9
chr15	32360798	32391228	204	-0.0475118	0.792731	0.840243	0.0213518	hypo	8
chr7	137525258	137544003	135	-0.107321	0.662817	0.770138	0.0317168	hypo	9
chr4	176578936	176606563	200	-0.0442762	0.830941	0.875217	0.0195167	hypo	9
chr7	30167791	30181746	174	-0.108903	0.512766	0.621669	0.0418543	hypo	9
chr11	128589123	128604741	192	-0.0710382	0.461109	0.532148	0.0302085	hypo	9
chr6	72121847	72145275	181	-0.0876602	0.657874	0.745534	0.0350769	hypo	9
chr3	130049745	130091939	198	-0.0497199	0.717156	0.766876	0.0217502	hypo	8
chr12	132377025	132387496	188	-0.0709148	0.6106	0.681515	0.029763	hypo	9
chr7	97729434	97745812	180	-0.0806488	0.681261	0.76191	0.0322211	hypo	9
chr2	112807548	112817850	113	-0.10738	0.482566	0.589945	0.0272734	hypo	9
chr2	223124021	223148892	193	-0.0576383	0.728841	0.78648	0.0246739	hypo	9
chr14	68860407	68884691	162	-0.0605699	0.728383	0.788953	0.0217046	hypo	9
chr14	23003852	23021792	165	-0.0613654	0.709062	0.770427	0.0225378	hypo	9
chr6	45966904	45990639	194	-0.0794786	0.661177	0.740656	0.0344121	hypo	9
chr19	47927263	47938499	194	-0.0993928	0.353811	0.453204	0.0426269	hypo	9
chr20	16729829	16763944	178	-0.0581108	0.787847	0.845958	0.0229212	hypo	8
chr8	105370517	105387687	179	-0.0547906	0.778972	0.833763	0.0217613	hypo	9
chr11	69664981	69682216	172	-0.0667753	0.74613	0.812905	0.025617	hypo	9
chr1	51982358	51995715	136	-0.0850403	0.570663	0.655704	0.0260142	hypo	9
chr13	35315671	35335702	139	-0.0637055	0.725193	0.788899	0.0196768	hypo	9
chr5	64351818	64383523	206	-0.0894468	0.743386	0.832833	0.0410429	hypo	7
chr3	1879718	1911766	172	-0.056043	0.791243	0.847286	0.0214414	hypo	8
chr2	131551056	131565044	146	-0.0909973	0.574434	0.665431	0.0293303	hypo	9
chr8	101912744	101923227	157	-0.0859	0.512266	0.598166	0.0298813	hypo	9
chr10	102409085	102419742	189	-0.0761515	0.320119	0.39627	0.0319391	hypo	9
chr7	95392263	95412018	141	-0.0698459	0.721861	0.791707	0.0219558	hypo	9
chr13	103652597	103675965	162	-0.0550111	0.77685	0.831861	0.0198634	hypo	9
chr14	102220555	102233071	143	-0.0680228	0.586561	0.654583	0.0217046	hypo	9
chr15	42083704	42096956	154	-0.062115	0.793287	0.855402	0.0213518	hypo	9
chr4	1826885	1838600	174	-0.050186	0.817431	0.867617	0.0195167	hypo	9
chr3	170729872	170753934	188	-0.0531424	0.757954	0.811096	0.0224293	hypo	9
chr3	46922698	46937710	163	-0.0591311	0.528912	0.588043	0.0216112	hypo	9
chr19	9725006	9739988	164	-0.103266	0.661431	0.764696	0.0379052	hypo	9
chr3	186071237	186082481	167	-0.0885479	0.546214	0.634762	0.0332017	hypo	9
chr3	188096586	188118068	153	-0.071074	0.774805	0.845879	0.024184	hypo	9
chr2	127636725	127652355	171	-0.0548377	0.769761	0.824599	0.0210406	hypo	9
chr10	134685197	134698711	196	-0.049144	0.808306	0.85745	0.0216161	hypo	9
chr12	124012811	124024648	167	-0.105409	0.581585	0.686994	0.0391582	hypo	9
chr4	22225617	22252411	182	-0.0477427	0.80133	0.849073	0.0195167	hypo	9
chr14	94947843	94963092	187	-0.0568439	0.673	0.729844	0.024061	hypo	9
chr18	2838960	2849071	135	-0.0723714	0.474743	0.547115	0.022539	hypo	9
chr12	93318547	93330982	140	-0.120167	0.54936	0.669527	0.0376624	hypo	9
chr19	675844	689678	208	-0.0800448	0.60625	0.686295	0.0374542	hypo	9
chr2	219513281	219524703	157	-0.0616334	0.751429	0.813062	0.0218868	hypo	9
chr8	145904507	145915076	166	-0.0677934	0.562901	0.630694	0.0254052	hypo	9
chr13	95608376	95627724	163	-0.0647551	0.607816	0.672571	0.0236756	hypo	9
chr3	181939319	181969132	192	-0.0519524	0.784861	0.836814	0.0224401	hypo	8
chr8	69746986	69775065	187	-0.0517862	0.733546	0.785332	0.0218178	hypo	9
chr3	100201321	100223902	169	-0.0575195	0.675016	0.732536	0.0219433	hypo	9
chr3	38379481	38396564	144	-0.113546	0.694369	0.807916	0.0360929	hypo	9
chr11	63375075	63386956	194	-0.065905	0.583546	0.649451	0.0287976	hypo	9
chr4	190701307	190716957	176	-0.0491748	0.75617	0.805345	0.0195167	hypo	9
chr12	4749172	4770558	195	-0.0624958	0.661971	0.724467	0.0276689	hypo	9
chr2	191884348	191896645	136	-0.078647	0.511035	0.589682	0.0244393	hypo	9
chr6	39894647	39917243	176	-0.0712314	0.691856	0.763087	0.0282262	hypo	9
chr16	78124830	78138553	195	-0.0667014	0.571619	0.63832	0.0290169	hypo	9
chr12	119605648	119618424	169	-0.0608549	0.705757	0.766612	0.023354	hypo	9
chr11	127689188	127719957	205	-0.0530759	0.783729	0.836805	0.0246326	hypo	8
chr6	36946297	36958002	176	-0.0790047	0.583584	0.662589	0.0314252	hypo	9
chr2	75866143	75888143	167	-0.0773952	0.708854	0.786249	0.0294883	hypo	9
chr14	36645726	36681397	170	-0.056308	0.77959	0.835898	0.0217047	hypo	8
chr5	98929678	98970468	197	-0.049583	0.786034	0.835617	0.0221561	hypo	8
chr17	76702857	76715148	157	-0.076662	0.652659	0.729321	0.0272933	hypo	9
chr2	113544232	113563873	152	-0.0611683	0.829158	0.890326	0.0211062	hypo	9
chr3	38074892	38087382	172	-0.0893362	0.526534	0.61587	0.0347648	hypo	9
chr2	31045355	31084880	180	-0.0532844	0.837474	0.890759	0.0217468	hypo	8
chr15	42255524	42268986	164	-0.11443	0.457927	0.572357	0.042608	hypo	9
chr20	48411674	48425110	179	-0.0729436	0.66723	0.740174	0.0296047	hypo	9
chr12	98984263	98996600	190	-0.0592549	0.556447	0.615702	0.0257301	hypo	9
chr12	734547	745434	154	-0.0680265	0.743216	0.811243	0.0239848	hypo	9
chr15	56744400	56763065	175	-0.073429	0.732401	0.80583	0.0291873	hypo	9
chr3	72720259	72737767	173	-0.0593022	0.851624	0.910926	0.0233535	hypo	9
chr17	76721668	76733624	158	-0.0790693	0.557971	0.637041	0.0285711	hypo	9
chr3	111244339	111270666	137	-0.0686517	0.69237	0.761021	0.0214414	hypo	9
chr7	105645871	105661986	151	-0.0637645	0.738213	0.801977	0.0219556	hypo	9
chr8	22073854	22086990	180	-0.0628283	0.772906	0.835734	0.0258936	hypo	9
chr2	175584419	175602925	189	-0.0488061	0.652559	0.701365	0.0210406	hypo	9
chr14	62574977	62594554	153	-0.0621896	0.605605	0.667794	0.0217046	hypo	9
chr13	99875039	99889405	135	-0.0730258	0.664415	0.73744	0.02253	hypo	9
chr9	104030807	104070794	200	-0.0497052	0.78766	0.837365	0.0226866	hypo	8
chr4	75222053	75244216	187	-0.0478613	0.669756	0.717617	0.020409	hypo	9
chr8	38467923	38489084	193	-0.0557847	0.783243	0.839027	0.0245058	hypo	9
chr1	240249424	240263809	145	-0.0734781	0.58276	0.656238	0.0244181	hypo	9
chr6	37611327	37623650	179	-0.067467	0.688833	0.7563	0.0275456	hypo	9
chr13	27465658	27481525	194	-0.0452054	0.782215	0.827421	0.020077	hypo	9
chr10	44501097	44525267	186	-0.0508241	0.792043	0.842868	0.0216161	hypo	9
chr4	155328328	155354492	179	-0.0715407	0.668973	0.740514	0.0292496	hypo	9
chr2	130534640	130552672	182	-0.0524816	0.829617	0.882099	0.02188	hypo	9
chr2	204449082	204470887	203	-0.0491079	0.818832	0.86794	0.022858	hypo	9
chr20	32075760	32086844	190	-0.101204	0.648672	0.749875	0.0439274	hypo	9
chr10	71207671	71220572	166	-0.0787313	0.641737	0.720468	0.0295143	hypo	9
chr22	22333880	22346568	190	-0.106625	0.701482	0.808107	0.0463382	hypo	9
chr1	52511650	52524566	169	-0.149285	0.317448	0.466733	0.0577022	hypo	9
chr17	80272030	80285005	204	-0.0588982	0.725268	0.784166	0.0275461	hypo	9
chr4	12721959	12750049	186	-0.0475031	0.799075	0.846578	0.0202573	hypo	9
chr14	98441311	98463591	180	-0.0527519	0.784427	0.837179	0.0217943	hypo	9
chr12	114167457	114187280	179	-0.0553812	0.715836	0.771217	0.0227526	hypo	9
chr10	43446065	43466053	189	-0.0510764	0.774958	0.826035	0.0222265	hypo	9
chr2	27437735	27447898	124	-0.0849105	0.61493	0.699841	0.0242651	hypo	9
chr3	133214824	133233564	147	-0.0634962	0.781587	0.845083	0.0214414	hypo	9
chr6	86379341	86390510	180	-0.0987095	0.320628	0.419337	0.0408163	hypo	9
chr7	44343603	44359078	151	-0.0746551	0.731451	0.806106	0.0259451	hypo	9
chr10	125491144	125508678	173	-0.0546566	0.786954	0.841611	0.0217618	hypo	9
chr1	87162122	87177644	160	-0.109377	0.435715	0.545091	0.0403622	hypo	9
chr3	54261507	54283095	183	-0.0508924	0.817051	0.867944	0.0214414	hypo	9
chr17	55044420	55057042	128	-0.0968019	0.61091	0.707712	0.0287394	hypo	9
chr9	33064801	33079009	174	-0.0983767	0.682716	0.781093	0.0403332	hypo	9
chr14	30712042	30744073	187	-0.0503104	0.768613	0.818924	0.0217046	hypo	8
chr2	51557924	51592015	161	-0.0566326	0.793102	0.849735	0.0210406	hypo	8
chr3	154790732	154807007	146	-0.104997	0.647282	0.752279	0.0353767	hypo	9
chr12	126123115	126144258	193	-0.0510649	0.789618	0.840683	0.0227522	hypo	9
chr17	57287703	57299066	197	-0.0634477	0.633266	0.696714	0.0289218	hypo	9
chr1	39281399	39292046	148	-0.074399	0.558758	0.633157	0.0254272	hypo	9
chr9	126720959	126735406	159	-0.061676	0.7678	0.829476	0.0227055	hypo	9
chr3	6898567	6915737	182	-0.0874213	0.475643	0.563064	0.0367667	hypo	9
chr8	142517839	142531748	165	-0.0649709	0.572179	0.63715	0.0250793	hypo	9
chr15	91724708	91746847	181	-0.0508976	0.785416	0.836314	0.0213518	hypo	9
chr20	57733118	57752011	171	-0.0576364	0.726546	0.784183	0.0228557	hypo	9
chr11	119400242	119416987	160	-0.0690238	0.739781	0.808804	0.0256059	hypo	9
chr20	965988	987694	202	-0.0489763	0.754505	0.803482	0.022944	hypo	9
chr21	44069337	44079504	151	-0.0748978	0.601128	0.676026	0.0263454	hypo	9
chr3	134121605	134140906	167	-0.0811417	0.699409	0.78055	0.0315444	hypo	9
chr2	122037643	122048892	171	-0.0934243	0.603162	0.696587	0.037105	hypo	9
chr13	23216969	23233857	172	-0.049254	0.811376	0.860631	0.0196898	hypo	9
chr9	37277665	37302578	134	-0.0799957	0.627786	0.707781	0.0247631	hypo	9
chr13	28338899	28352882	147	-0.0728343	0.758381	0.831215	0.025105	hypo	9
chr12	15451936	15480845	170	-0.0575624	0.683796	0.741358	0.0227522	hypo	9
chr12	123285716	123303085	189	-0.0525615	0.749772	0.802334	0.023092	hypo	9
chr3	186515137	186526601	159	-0.177727	0.615908	0.793635	0.0659497	hypo	7
chr21	37947756	37963134	170	-0.0533877	0.803695	0.857083	0.0211278	hypo	9
chr8	59568057	59578572	139	-0.0915743	0.544196	0.63577	0.0297198	hypo	9
chr2	64911397	64935894	158	-0.0574535	0.851391	0.908845	0.0211568	hypo	9
chr7	142326234	142345974	191	-0.0495763	0.703813	0.753389	0.0220594	hypo	9
chr11	13257667	13282670	183	-0.066909	0.802689	0.869598	0.0286038	hypo	9
chr17	74574826	74589345	157	-0.125347	0.570966	0.696314	0.0458358	hypo	9
chr13	43059214	43090719	159	-0.0539249	0.827901	0.881826	0.0199844	hypo	8
chr4	36308640	36331601	168	-0.0497925	0.7675	0.817293	0.0195167	hypo	9
chr12	29525345	29542251	139	-0.0841943	0.564889	0.649084	0.0273719	hypo	9
chr18	74875430	74891236	206	-0.0419077	0.829309	0.871216	0.0201633	hypo	9
chr15	86773504	86794443	174	-0.0525028	0.709552	0.762055	0.0213518	hypo	9
chr10	7853658	7864607	170	-0.0624664	0.487425	0.549892	0.0249038	hypo	9
chr11	113844382	113858640	169	-0.0634639	0.653805	0.717269	0.0250989	hypo	9
chr3	56942425	56959581	157	-0.0803738	0.665387	0.745761	0.0292701	hypo	9
chr12	52337431	52351350	134	-0.134875	0.586134	0.721008	0.0419776	hypo	9
chr15	100099625	100110495	135	-0.12837	0.434082	0.562453	0.0405529	hypo	9
chr3	45181464	45192083	147	-0.0953973	0.561664	0.657061	0.0328209	hypo	9
chr14	93209884	93222529	186	-0.0540818	0.604199	0.658281	0.0236581	hypo	9
chr6	138143547	138170275	158	-0.063294	0.793616	0.85691	0.0235858	hypo	9
chr2	25495004	25505651	172	-0.0790136	0.609984	0.688997	0.0317829	hypo	9
chr4	84786390	84817121	173	-0.0479705	0.783059	0.831029	0.0195167	hypo	8
chr11	85361526	85381836	192	-0.0736639	0.488446	0.56211	0.0329828	hypo	9
chr1	151011614	151024812	153	-0.0861515	0.640315	0.726467	0.0309543	hypo	9
chr14	100109096	100121756	188	-0.0610451	0.715903	0.776948	0.027103	hypo	9
chr6	164497107	164512576	170	-0.0562788	0.778315	0.834594	0.0225293	hypo	9
chr4	103414198	103431172	130	-0.0885268	0.609096	0.697622	0.0270913	hypo	9
chr5	179772453	179784365	170	-0.0785369	0.554703	0.63324	0.0314421	hypo	9
chr18	38411569	38444811	204	-0.0417137	0.82412	0.865834	0.0200831	hypo	8
chr18	56273844	56288896	155	-0.0635653	0.838841	0.902406	0.0229484	hypo	9
chr19	58836132	58847590	189	-0.0827311	0.746623	0.829354	0.0369204	hypo	9
chr4	13966608	13994766	172	-0.0480435	0.777574	0.825618	0.0195167	hypo	9
chr20	54922593	54936443	188	-0.0580568	0.666524	0.72458	0.0258346	hypo	9
chr3	197628072	197639655	127	-0.083568	0.815298	0.898866	0.0248497	hypo	9
chr1	35203737	35218006	157	-0.0633306	0.748573	0.811904	0.0235134	hypo	9
chr1	28694468	28704945	145	-0.0685641	0.693095	0.76166	0.0235113	hypo	9
chr16	21306610	21317943	129	-0.141462	0.536359	0.677822	0.0429983	hypo	9
chr2	96336661	96362154	167	-0.0650211	0.75819	0.823211	0.0257167	hypo	9
chr8	142920857	142937848	176	-0.0561783	0.709402	0.76558	0.0235274	hypo	9
chr18	49138261	49169987	168	-0.0505526	0.726122	0.776675	0.0201447	hypo	8
chr17	77065611	77076150	171	-0.0673221	0.709691	0.777013	0.0273063	hypo	9
chr5	78397740	78413507	156	-0.0732043	0.669335	0.742539	0.026965	hypo	9
chr3	42296907	42311175	169	-0.0647572	0.527004	0.591762	0.0260842	hypo	9
chr2	18734764	18750230	116	-0.076453	0.668847	0.7453	0.0210406	hypo	9
chr15	100888048	100917013	173	-0.0832047	0.603571	0.686776	0.0342951	hypo	8
chr1	43416641	43427453	163	-0.092433	0.406306	0.498739	0.035731	hypo	9
chr1	110520018	110535443	162	-0.0817174	0.707818	0.789536	0.0311727	hypo	9
chr2	189147226	189171719	177	-0.0831241	0.560981	0.644105	0.0350652	hypo	9
chr15	71722026	71745142	159	-0.0565325	0.730435	0.786967	0.0213518	hypo	9
chr3	38201847	38213511	142	-0.0863044	0.606132	0.692437	0.0291611	hypo	9
chr6	159485453	159502577	175	-0.0548659	0.792843	0.847709	0.0228464	hypo	9
chr2	84679618	84692475	152	-0.0753386	0.656442	0.73178	0.0272685	hypo	9
chr14	107114253	107138759	182	-0.0504887	0.672197	0.722686	0.0218646	hypo	9
chr18	61649796	61675096	184	-0.0458337	0.862497	0.908331	0.0200565	hypo	9
chr6	144380361	144390734	142	-0.0779989	0.476383	0.554382	0.0263384	hypo	9
chr7	119904376	119918125	172	-0.0593975	0.589407	0.648804	0.024349	hypo	9
chr16	14009816	14020501	149	-0.0773876	0.519026	0.596414	0.0275799	hypo	9
chr4	96258300	96295641	175	-0.0471366	0.825659	0.872795	0.0196627	hypo	8
chr6	35416039	35427915	139	-0.0792724	0.597182	0.676455	0.0268034	hypo	9
chr18	47827478	47846462	160	-0.0679349	0.598962	0.666897	0.0260332	hypo	9
chr2	9339229	9352240	148	-0.0965536	0.485479	0.582033	0.0341281	hypo	9
chr1	22954989	22969108	155	-0.070972	0.646777	0.717749	0.0264591	hypo	9
chr10	10526380	10553645	167	-0.0542923	0.795272	0.849564	0.0216816	hypo	9
chr4	146722423	146744941	164	-0.0497605	0.845817	0.895577	0.0195167	hypo	9
chr6	40258027	40280068	171	-0.0550856	0.681407	0.736493	0.022533	hypo	9
chr3	16296661	16310133	182	-0.0687912	0.596806	0.665597	0.0298813	hypo	9
chr13	29054162	29065881	115	-0.0889699	0.673642	0.762612	0.0247216	hypo	9
chr9	127256405	127267733	152	0.0634189	0.728952	0.665534	0.0231383	hyper	9
chr13	101696904	101717554	175	-0.0468991	0.794157	0.841056	0.0196921	hypo	9
chr21	41755353	41778937	193	-0.0455284	0.756835	0.802364	0.0210946	hypo	9
chr2	231055031	231082187	127	-0.08836	0.693465	0.781825	0.0275385	hypo	8
chr1	21101391	21112173	100	-0.0997595	0.642626	0.742386	0.0240666	hypo	9
chr4	79692785	79708737	146	-0.106187	0.509538	0.615726	0.0371436	hypo	9
chr6	31317331	31338625	168	-0.0617615	0.53147	0.593232	0.0248567	hypo	9
chr16	57443170	57453968	161	-0.108798	0.612118	0.720917	0.0420517	hypo	9
chr14	25513545	25528490	142	-0.0782686	0.569312	0.647581	0.0266493	hypo	9
chr18	56730011	56745472	153	-0.0546707	0.775992	0.830662	0.020126	hypo	9
chr4	23783548	23804068	180	-0.0450869	0.775793	0.82088	0.0195167	hypo	9
chr2	26206159	26218102	161	-0.0616487	0.76515	0.826799	0.0239576	hypo	9
chr14	24549632	24566497	158	-0.0681117	0.619246	0.687358	0.02583	hypo	9
chr11	126383438	126396533	186	-0.0550038	0.807812	0.862816	0.0246326	hypo	9
chr7	107828117	107855950	172	-0.0529918	0.770366	0.823358	0.0219625	hypo	9
chr3	25693084	25709525	134	-0.0894168	0.380437	0.469854	0.0285983	hypo	9
chr5	127413324	127425843	123	-0.16244	0.324596	0.487036	0.0479903	hypo	7
chr12	2041048	2052140	172	-0.0548304	0.794399	0.849229	0.0227522	hypo	9
chr2	38256924	38278065	159	-0.0735563	0.745324	0.818881	0.0280844	hypo	9
chr1	37504086	37518149	142	-0.0902524	0.552296	0.642549	0.030839	hypo	9
chr16	52575934	52588080	127	-0.0887171	0.419905	0.508622	0.0274042	hypo	9
chr18	30763062	30797087	177	-0.0468599	0.801104	0.847964	0.0200453	hypo	8
chr7	150668227	150680054	149	0.0629401	0.498579	0.435639	0.0226649	hyper	9
chr1	37298552	37314665	178	-0.0546363	0.726122	0.780759	0.0235113	hypo	9
chr5	76781454	76803782	147	-0.0683249	0.62079	0.689115	0.0243992	hypo	9
chr4	27727531	27762289	183	-0.0440757	0.796836	0.840911	0.0195167	hypo	8
chr7	153515264	153538824	164	-0.0564758	0.787072	0.843548	0.0223876	hypo	9
chr19	45580480	45591423	171	-0.0902863	0.498447	0.588733	0.0374404	hypo	9
chr13	75458580	75491772	191	-0.0424874	0.759897	0.802384	0.0196768	hypo	8
chr5	119796515	119813126	112	-0.0890363	0.528998	0.618034	0.024245	hypo	9
chr2	64865064	64878102	146	-0.0594383	0.40223	0.461668	0.0210465	hypo	9
chr5	89768798	89779488	164	-0.0955573	0.486118	0.581675	0.0386462	hypo	9
chr8	56890815	56907544	156	-0.0677535	0.718831	0.786585	0.0256276	hypo	9
chr7	46416044	46451541	186	-0.0486339	0.800712	0.849346	0.0219556	hypo	8
chr18	27957153	27992974	161	-0.0520549	0.774422	0.826477	0.020401	hypo	8
chr8	6771838	6788721	180	-0.0599446	0.717563	0.777508	0.0261643	hypo	9
chr5	137222329	137238080	183	-0.0517033	0.709012	0.760715	0.0230008	hypo	9
chr13	70475959	70511602	176	-0.0462115	0.810435	0.856646	0.0197877	hypo	8
chr16	69788787	69799054	172	-0.0621904	0.59339	0.65558	0.0260124	hypo	9
chr3	39572693	39604557	158	-0.0557722	0.795354	0.851126	0.0214414	hypo	8
chr7	158220833	158230930	132	-0.0772749	0.694274	0.771549	0.0247394	hypo	9
chr15	57208237	57221178	127	-0.0740373	0.449565	0.523602	0.0228544	hypo	9
chr7	130577644	130589042	179	-0.0522143	0.780019	0.832233	0.0228073	hypo	9
chr20	59819020	59831077	153	-0.075235	0.622181	0.697416	0.0283171	hypo	9
chr1	155195063	155206349	143	0.0722564	0.626898	0.554641	0.0252929	hyper	9
chr9	128643002	128665347	144	-0.081687	0.705764	0.787451	0.0288695	hypo	9
chr14	60035518	60053183	156	-0.0584717	0.622241	0.680713	0.0222632	hypo	9
chr13	76050239	76062093	117	-0.0846963	0.387337	0.472033	0.0250173	hypo	9
chr5	13246376	13276395	155	-0.0570382	0.76199	0.819029	0.0216101	hypo	8
chr13	38541063	38578775	168	-0.0478961	0.791348	0.839244	0.0196768	hypo	8
chr15	70525376	70540160	143	-0.0616663	0.779638	0.841304	0.0215601	hypo	9
chr1	213908162	213937582	189	-0.0508457	0.746959	0.797805	0.0235113	hypo	8
chr8	30006252	30017389	114	-0.0922627	0.491111	0.583374	0.0258141	hypo	9
chr6	132112732	132130019	145	-0.0659508	0.653176	0.719127	0.0233769	hypo	9
chr2	11714957	11725163	169	-0.0526394	0.782679	0.835318	0.0217914	hypo	9
chr18	22495467	22516438	187	-0.0437886	0.822798	0.866587	0.0200453	hypo	9
chr10	120209347	120230795	179	-0.0493276	0.718678	0.768006	0.0216161	hypo	9
chr3	138725418	138743093	167	-0.0529185	0.783447	0.836365	0.0216378	hypo	9
chr10	60262977	60281918	141	-0.113572	0.507082	0.620653	0.039157	hypo	9
chr2	103891552	103913750	176	-0.0488139	0.741134	0.789948	0.0210406	hypo	9
chr6	43106444	43116625	129	-0.0712951	0.815476	0.886771	0.0225288	hypo	9
chr17	628407	638551	159	-0.0698289	0.722127	0.791956	0.027203	hypo	9
chr9	4582690	4602673	175	-0.052901	0.859249	0.91215	0.0226865	hypo	9
chr7	147582381	147605964	165	-0.0544235	0.806815	0.861238	0.0220197	hypo	9
chr4	164076987	164092879	153	-0.0615611	0.523463	0.585024	0.0232776	hypo	9
chr1	165337486	165351091	179	-0.0822172	0.561771	0.643988	0.0359765	hypo	9
chr18	40507309	40544569	188	-0.0436701	0.803527	0.847197	0.0201376	hypo	8
chr10	7545150	7560134	125	-0.0779865	0.75647	0.834456	0.0241576	hypo	9
chr6	159670603	159689455	177	-0.0519705	0.812415	0.864385	0.0225697	hypo	9
chr9	111872890	111883166	168	0.0608638	0.583124	0.52226	0.0250597	hyper	9
chr2	208082478	208105163	165	-0.0519552	0.782275	0.83423	0.0210406	hypo	9
chr21	38910529	38924752	158	-0.0596539	0.733914	0.793568	0.0233196	hypo	9
chr7	99752709	99764805	150	-0.0737699	0.576562	0.650332	0.0274557	hypo	9
chr12	41579897	41600004	167	-0.0840357	0.520243	0.604279	0.0347359	hypo	9
chr10	128986677	129001441	184	-0.0757346	0.617278	0.693012	0.034052	hypo	9
chr13	40830524	40855398	163	-0.0490714	0.848409	0.897481	0.0196768	hypo	9
chr12	12843395	12854003	134	0.11598	0.622883	0.506903	0.0382284	hyper	9
chr1	70024104	70049663	176	-0.0794957	0.40926	0.488755	0.0345176	hypo	9
chr5	151622122	151654508	177	-0.049592	0.756563	0.806155	0.0216101	hypo	8
chr11	45304251	45322535	142	-0.071423	0.634941	0.706364	0.0250298	hypo	9
chr3	897631	932481	179	-0.0506866	0.784447	0.835133	0.022384	hypo	8
chr10	35583811	35601509	164	-0.0546875	0.83345	0.888138	0.0220959	hypo	9
chr2	180556242	180589119	175	-0.0487529	0.832746	0.881499	0.0210406	hypo	8
chr7	131644443	131677996	168	-0.0529829	0.764494	0.817477	0.0219556	hypo	8
chr10	99665354	99680091	176	-0.0500211	0.718177	0.768198	0.0217199	hypo	9
chr2	100672150	100689825	153	-0.0637439	0.838901	0.902645	0.0238874	hypo	9
chr6	156864310	156876454	151	-0.0611089	0.755292	0.816401	0.0228197	hypo	9
chr6	113942819	113967970	146	-0.0655237	0.717191	0.782715	0.023767	hypo	9
chr13	32409264	32431492	168	-0.0989243	0.692034	0.790958	0.0413149	hypo	9
chr18	3247117	3260209	174	-0.0606848	0.388959	0.449644	0.0263048	hypo	9
chr3	186324241	186335726	148	-0.0589905	0.691093	0.750084	0.0216072	hypo	9
chr1	20749335	20764129	139	-0.0683902	0.699378	0.767768	0.0235283	hypo	9
chr4	17809296	17820310	157	-0.0773263	0.412443	0.489769	0.0301358	hypo	9
chr9	104197886	104219088	133	-0.0716981	0.69843	0.770128	0.023726	hypo	9
chr14	90686788	90709392	143	-0.0851495	0.701196	0.786346	0.0296551	hypo	9
chr20	12799845	12828605	171	-0.0539348	0.785301	0.839236	0.0228557	hypo	9
chr17	55676682	55689541	155	-0.0808237	0.73747	0.818294	0.0308072	hypo	9
chr5	122105409	122124114	144	-0.13001	0.605894	0.735904	0.0462158	hypo	7
chr18	3489554	3504959	161	-0.0502336	0.68969	0.739924	0.0200453	hypo	9
chr1	33767562	33784300	158	-0.080454	0.737601	0.818054	0.0313329	hypo	9
chr13	20167542	20186069	167	-0.0548865	0.762551	0.817438	0.0228118	hypo	9
chr2	48122753	48134003	111	-0.0914208	0.463367	0.554788	0.0252859	hypo	9
chr12	133261755	133274291	120	-0.0964525	0.652455	0.748907	0.0283037	hypo	9
chr5	142586961	142603574	160	-0.0544391	0.75163	0.806069	0.0216101	hypo	9
chr1	50705554	50739205	165	-0.061294	0.69206	0.753354	0.0250513	hypo	8
chr3	72782813	72794973	130	-0.067348	0.666244	0.733592	0.021783	hypo	9
chr1	111089855	111104949	139	-0.0681282	0.650669	0.718797	0.0235114	hypo	9
chr15	77357356	77369443	166	-0.105844	0.567986	0.67383	0.0435398	hypo	9
chr7	63346866	63365801	156	-0.0614312	0.643673	0.705105	0.0238757	hypo	9
chr18	29145751	29166905	171	-0.0473842	0.840183	0.887567	0.0201338	hypo	9
chr8	42742621	42753131	174	-0.0542549	0.404496	0.458751	0.0233355	hypo	9
chr15	60879621	60892474	161	-0.0883615	0.494133	0.582495	0.0357743	hypo	9
chr20	376442	389284	167	-0.0565233	0.723254	0.779777	0.023454	hypo	9
chr7	129461722	129471932	165	-0.0726235	0.64663	0.719254	0.0300087	hypo	9
chr1	234901420	234912752	167	-0.0726039	0.658206	0.73081	0.0300716	hypo	9
chr14	95619335	95629662	133	-0.0675724	0.58424	0.651812	0.0223664	hypo	9
chr9	33218834	33234148	155	-0.058711	0.796037	0.854748	0.0226865	hypo	9
chr20	35814913	35827375	137	-0.0669143	0.723272	0.790186	0.0228557	hypo	9
chr12	97289036	97308398	176	-0.0693506	0.619885	0.689236	0.0305255	hypo	9
chr2	196951487	196979516	150	-0.0564321	0.734767	0.791199	0.0211341	hypo	9
chr22	23221126	23241828	153	-0.0949238	0.493575	0.588499	0.0361048	hypo	9
chr18	44642372	44669726	179	-0.050785	0.888899	0.939684	0.0224746	hypo	9
chr5	56713971	56739414	163	-0.0531081	0.753155	0.806263	0.0216101	hypo	9
chr10	85953951	85966497	163	-0.0703315	0.642659	0.71299	0.0287191	hypo	9
chr2	18291610	18331063	179	-0.0471928	0.747721	0.794913	0.0210992	hypo	8
chr11	2496062	2510503	154	-0.0693783	0.747589	0.816967	0.0266201	hypo	9
chr2	68001697	68030051	181	-0.0465263	0.839675	0.886201	0.0210406	hypo	9
chr9	87004440	87019345	170	-0.0535875	0.793895	0.847482	0.0227705	hypo	9
chr7	108195757	108212603	173	-0.0833898	0.531123	0.614513	0.0364214	hypo	9
chr1	203725748	203741104	172	-0.0546642	0.821438	0.876102	0.0235113	hypo	9
chr15	99611155	99625661	126	-0.0677514	0.745497	0.813249	0.0213518	hypo	9
chr8	145972083	145985205	142	-0.10318	0.65189	0.75507	0.0367119	hypo	9
chr10	14057605	14072148	146	-0.0678557	0.643394	0.71125	0.0248682	hypo	9
chr1	172399795	172422243	147	-0.065503	0.760067	0.82557	0.0241949	hypo	9
chr4	184565445	184579072	142	-0.0635938	0.769529	0.833123	0.0225155	hypo	9
chr1	207487974	207506843	163	-0.0829147	0.515006	0.597921	0.0338363	hypo	9
chr7	130350747	130361450	128	-0.118127	0.597316	0.715442	0.03752	hypo	9
chr7	127664354	127677526	125	-0.141109	0.638874	0.779983	0.0437575	hypo	9
chr2	65430703	65447033	167	-0.0532597	0.858808	0.912067	0.0223793	hypo	9
chr3	123489670	123510497	180	-0.0474831	0.856726	0.904209	0.0214414	hypo	9
chr10	91921556	91954742	166	-0.0518892	0.83442	0.886309	0.0216161	hypo	8
chr8	134527159	134542815	148	-0.0588538	0.789488	0.848342	0.0218763	hypo	9
chr20	23610881	23622928	141	-0.0648121	0.646391	0.711203	0.0229339	hypo	9
chr12	1730156	1740677	145	-0.0650057	0.631932	0.696937	0.023761	hypo	9
chr1	40971894	40982661	166	-0.103946	0.612458	0.716404	0.0434289	hypo	9
chr10	121458124	121474227	146	-0.0652547	0.707358	0.772612	0.0237925	hypo	9
chr2	100933035	100945375	123	-0.125924	0.572895	0.698819	0.0390434	hypo	9
chr20	31783970	31802387	159	-0.0572371	0.728697	0.785934	0.0228704	hypo	9
chr8	72451655	72465130	113	-0.0804532	0.317267	0.39772	0.0228712	hypo	9
chr12	14382727	14402542	142	-0.0783027	0.714527	0.79283	0.0276735	hypo	9
chr4	170214083	170238112	156	-0.0530211	0.815756	0.868777	0.0207585	hypo	9
chr10	77147916	77158200	119	-0.0893199	0.473324	0.562644	0.0270895	hypo	9
chr11	60208994	60235877	137	-0.0739523	0.647693	0.721645	0.0255185	hypo	9
chr3	98240326	98252891	134	-0.0711749	0.706762	0.777937	0.0240917	hypo	9
chr9	112255420	112269986	156	-0.0756556	0.540069	0.615724	0.0296124	hypo	9
chr13	37457356	37480155	182	-0.0435984	0.859479	0.903077	0.0200236	hypo	9
chr2	240450873	240462409	165	-0.0505155	0.824024	0.87454	0.0210406	hypo	9
chr4	73543175	73581272	134	-0.0592143	0.797343	0.856557	0.0200111	hypo	8
chr1	192510224	192541186	176	-0.0528549	0.760223	0.813078	0.0235113	hypo	8
chr6	1365750	1378118	119	-0.0763439	0.558892	0.635236	0.0229433	hypo	9
chr1	249143290	249155201	165	0.104773	0.641369	0.536596	0.043684	hyper	9
chr12	41069673	41093606	169	-0.0917452	0.618996	0.710741	0.0392088	hypo	9
chr3	186729695	186742172	142	-0.0737185	0.562359	0.636078	0.0265413	hypo	9
chr6	41268730	41288874	160	-0.0556534	0.720511	0.776165	0.0225564	hypo	9
chr14	92787962	92798662	158	-0.0565712	0.527726	0.584297	0.0226035	hypo	9
chr19	716471	726659	160	-0.0910536	0.645058	0.736112	0.0369204	hypo	9
chr21	15894708	15925117	164	-0.0507741	0.685499	0.736273	0.0211153	hypo	8
chr3	4540003	4555676	149	-0.0567202	0.527743	0.584463	0.0214414	hypo	9
chr1	12713322	12729885	163	-0.0646731	0.801771	0.866444	0.0267574	hypo	9
chr22	38842336	38855070	138	-0.115015	0.559315	0.67433	0.039721	hypo	9
chr8	117767865	117780095	166	0.0555831	0.613735	0.558152	0.0234862	hyper	9
chr22	32362357	32374351	179	-0.0564093	0.689289	0.745699	0.0256419	hypo	9
chr8	21355453	21381685	162	-0.0528762	0.779689	0.832565	0.0217581	hypo	9
chr6	1067903	1078846	153	-0.0602157	0.780532	0.840748	0.0234206	hypo	9
chr10	61631846	61650372	137	-0.0803892	0.68443	0.764819	0.0279277	hypo	9
chr15	84043580	84065590	170	-0.0754916	0.687048	0.762539	0.0326631	hypo	9
chr2	208334544	208347270	123	-0.0747796	0.766905	0.841685	0.0235951	hypo	9
chr3	32861033	32872541	151	-0.0661095	0.630901	0.69701	0.0256769	hypo	9
chr1	55681690	55695535	116	-0.0945363	0.512518	0.607054	0.0279573	hypo	9
chr5	17219698	17231629	115	-0.141599	0.513314	0.654913	0.0412459	hypo	9
chr4	174406684	174421446	128	-0.072097	0.540187	0.612284	0.0233916	hypo	9
chr12	3375458	3386381	159	-0.07191	0.744528	0.816438	0.0293663	hypo	9
chr18	45371085	45397178	166	-0.200213	0.622337	0.82255	0.0836621	hypo	2
chr8	39906477	39925733	139	-0.0613779	0.791674	0.853052	0.0217581	hypo	9
chr14	52114410	52125384	124	-0.160038	0.432981	0.59302	0.0503641	hypo	9
chr1	92489482	92503870	124	-0.0914508	0.679644	0.771095	0.0287982	hypo	9
chr2	2803260	2818261	156	-0.0528294	0.813787	0.866616	0.0210406	hypo	9
chr9	86866880	86883605	171	-0.0530527	0.787151	0.840204	0.0231941	hypo	9
chr16	22819938	22831942	133	-0.107482	0.438577	0.546059	0.0368424	hypo	9
chr12	72661901	72672823	138	-0.0822019	0.392141	0.474343	0.0290203	hypo	9
chr7	157463328	157473357	158	-0.0629925	0.604604	0.667596	0.02556	hypo	9
chr8	20196539	20214911	147	-0.0623308	0.751351	0.813682	0.0235226	hypo	9
chr6	3800885	3814829	176	-0.0499725	0.802585	0.852557	0.0225288	hypo	9
chr7	52406351	52433667	171	-0.0501201	0.813052	0.863172	0.0219556	hypo	9
chr14	61437213	61455028	152	-0.0687552	0.672889	0.741644	0.0267176	hypo	9
chr1	170488766	170506666	147	-0.0629868	0.659609	0.722596	0.023723	hypo	9
chr20	50089449	50102702	165	-0.0635013	0.826842	0.890344	0.0267354	hypo	9
chr13	50416672	50428651	130	-0.0678853	0.731995	0.79988	0.0225412	hypo	9
chr19	8109630	8123082	154	-0.0935239	0.729819	0.823343	0.0369204	hypo	9
chr15	66907475	66918874	127	-0.0673027	0.710405	0.777708	0.0218799	hypo	9
chr6	126656076	126679297	160	-0.0574951	0.711522	0.769017	0.0235678	hypo	9
chr20	5886083	5901937	136	-0.0991138	0.680017	0.779131	0.0345626	hypo	9
chr15	85283085	85300108	162	-0.0595008	0.560115	0.619616	0.0247427	hypo	9
chr9	89943140	89960825	169	-0.0522869	0.720988	0.773275	0.0226865	hypo	9
chr7	66912264	66934322	161	-0.0575695	0.76653	0.8241	0.0237445	hypo	9
chr1	75184908	75205823	162	-0.0706207	0.749365	0.819986	0.029408	hypo	9
chr12	26106982	26119672	125	-0.177129	0.472268	0.649397	0.0572644	hypo	6
chr4	7875971	7887766	143	-0.0540499	0.788499	0.842549	0.0198622	hypo	9
chr20	50024381	50038788	146	-0.0608561	0.816097	0.876953	0.0228736	hypo	9
chr10	95646334	95663111	170	-0.0717691	0.670666	0.742435	0.0314635	hypo	9
chr15	67148776	67164562	132	-0.0649376	0.712836	0.777774	0.0221793	hypo	9
chr6	112190407	112204743	140	-0.172171	0.47503	0.6472	0.0616555	hypo	5
chr17	66587753	66604462	134	-0.123592	0.572807	0.696399	0.0421659	hypo	9
chr17	63127246	63138485	134	-0.0871945	0.66519	0.752384	0.0300036	hypo	9
chr1	14032320	14051995	176	-0.0668186	0.763594	0.830412	0.0305041	hypo	9
chr19	1280171	1290913	157	-0.0947993	0.574302	0.669102	0.0384513	hypo	9
chr12	52311459	52325004	143	-0.0707055	0.769797	0.840503	0.0259932	hypo	9
chr10	133986999	133997235	162	-0.0523834	0.626867	0.67925	0.0219168	hypo	9
chr3	37484662	37497632	117	-0.0984026	0.542184	0.640586	0.0294874	hypo	9
chr5	128286267	128312816	137	-0.0930741	0.665558	0.758632	0.0328828	hypo	9
chr15	35079433	35094598	142	-0.05822	0.685383	0.743603	0.0213518	hypo	9
chr5	14674347	14689279	124	-0.0751203	0.740543	0.815664	0.0240867	hypo	9
chr8	42619068	42634677	147	-0.0572871	0.819624	0.876911	0.0217581	hypo	9
chr10	15754884	15766531	132	-0.0658478	0.573208	0.639056	0.0225005	hypo	9
chr11	33666296	33681576	159	-0.0599043	0.81592	0.875824	0.0246326	hypo	9
chr10	106240668	106265009	182	-0.0458468	0.794908	0.840755	0.0216161	hypo	9
chr7	86675124	86705448	144	-0.0780226	0.706225	0.784247	0.0290069	hypo	8
chr13	114440598	114451012	176	-0.0593218	0.749149	0.808471	0.0271128	hypo	9
chr14	92326308	92343202	159	-0.0795308	0.6605	0.740031	0.0329315	hypo	9
chr2	3371537	3384410	158	-0.0825477	0.456916	0.539464	0.0336374	hypo	9
chr2	6573786	6595164	163	-0.049708	0.85656	0.906268	0.0210406	hypo	9
chr13	34292900	34316973	165	-0.0465386	0.814765	0.861304	0.0199581	hypo	9
chr8	118056024	118079449	181	-0.0477436	0.734055	0.781799	0.0224734	hypo	9
chr1	108735376	108754069	118	0.114555	0.599871	0.485317	0.0348238	hyper	9
chr11	118685254	118698025	142	-0.0666478	0.707846	0.774494	0.0246326	hypo	9
chr2	233349417	233359785	135	-0.127716	0.512254	0.63997	0.0465674	hypo	9
chr8	125618516	125630772	131	-0.0721754	0.553573	0.625748	0.0245085	hypo	9
chr1	230551408	230563260	150	-0.0751347	0.411614	0.486749	0.0294503	hypo	9
chr1	25911798	25926628	154	-0.0585698	0.824468	0.883038	0.0235367	hypo	9
chr2	78887826	78916621	170	-0.0474385	0.792674	0.840112	0.0210406	hypo	9
chr9	74743602	74761911	142	-0.0683158	0.760549	0.828864	0.0252482	hypo	9
chr15	81595827	81609452	149	-0.0551127	0.700753	0.755865	0.0214601	hypo	9
chr12	120667695	120681348	142	-0.0685812	0.617358	0.685939	0.0253908	hypo	9
chr9	16864493	16874701	132	-0.0704109	0.518191	0.588602	0.0242651	hypo	9
chr19	51010617	51020863	160	-0.152582	0.562918	0.715499	0.0636994	hypo	9
chr5	172252873	172264601	138	-0.0608568	0.596802	0.657659	0.0219898	hypo	9
chr15	29962269	29972895	156	-0.0539077	0.664011	0.717919	0.0219935	hypo	9
chr1	54107848	54120718	166	-0.0541725	0.783678	0.837851	0.0235113	hypo	9
chr17	42846543	42857035	146	-0.0813512	0.47193	0.553282	0.031188	hypo	9
chr12	111583904	111595505	163	-0.0533593	0.796067	0.849426	0.0227522	hypo	9
chr8	86064695	86090206	150	-0.0621524	0.676218	0.73837	0.0245892	hypo	9
chr13	76836364	76866341	154	-0.0505408	0.830574	0.881114	0.020408	hypo	8
chr12	42975911	42985943	139	-0.0839186	0.481777	0.565696	0.0310801	hypo	9
chr21	42925415	42938289	152	-0.0584703	0.781909	0.840379	0.0233843	hypo	9
chr1	226652783	226671916	170	-0.0528378	0.829994	0.882832	0.0235113	hypo	9
chr1	22537771	22551160	162	-0.0564015	0.717832	0.774234	0.0239059	hypo	9
chr8	91323335	91357000	169	-0.0518892	0.75948	0.811369	0.0229392	hypo	8
chr5	169992782	170011122	158	-0.0524696	0.703047	0.755516	0.0217292	hypo	9
chr18	46352851	46366445	166	-0.0704329	0.67284	0.743273	0.030576	hypo	9
chr7	6427124	6437373	157	-0.0538862	0.853818	0.907704	0.022188	hypo	9
chr6	18116863	18128902	163	-0.0844286	0.752803	0.837232	0.0358822	hypo	9
chr7	87256216	87270912	155	-0.0986787	0.626496	0.725175	0.0404454	hypo	9
chr20	30295293	30309832	123	-0.0712182	0.662399	0.733617	0.0230175	hypo	9
chr3	122654846	122672116	142	-0.0576599	0.800772	0.858432	0.0215077	hypo	9
chr9	7791698	7818396	172	-0.0502381	0.752002	0.80224	0.0226865	hypo	9
chr14	65432472	65445451	147	-0.084981	0.658032	0.743013	0.0327126	hypo	9
chr16	27410474	27420805	125	-0.10085	0.39093	0.491779	0.0334881	hypo	9
chr2	65058954	65076010	149	-0.0649776	0.745922	0.8109	0.0254699	hypo	9
chr2	178410852	178429535	150	-0.074883	0.560351	0.635234	0.0296282	hypo	9
chr8	86345598	86362213	135	-0.0624241	0.75589	0.818314	0.0222853	hypo	9
chr6	14113310	14125278	108	-0.0835429	0.482192	0.565735	0.0237876	hypo	9
chr3	20090423	20103076	124	-0.079943	0.68036	0.760303	0.0262938	hypo	9
chr2	64671466	64686938	120	-0.0880587	0.721742	0.809801	0.027746	hypo	9
chr2	95738243	95750563	149	-0.0676281	0.730849	0.798477	0.0264346	hypo	9
chr6	32893493	32914418	170	-0.0512164	0.640221	0.691438	0.0229728	hypo	9
chr19	52214633	52227293	156	-0.090068	0.629205	0.719273	0.0370953	hypo	9
chr2	39170001	39186046	140	-0.0682407	0.821378	0.889619	0.0254916	hypo	9
chr1	231553510	231565676	120	-0.10673	0.46041	0.567141	0.0339752	hypo	9
chr2	6997530	7014301	155	-0.0833898	0.580927	0.664317	0.0341645	hypo	9
chr20	42875122	42888462	148	-0.0754569	0.683398	0.758855	0.0297626	hypo	9
chr12	559325	573667	154	-0.0957758	0.616429	0.712205	0.0391378	hypo	9
chr4	84455018	84468626	151	-0.0653676	0.634668	0.700036	0.0267281	hypo	9
chr7	29840636	29855009	151	-0.124059	0.59529	0.719349	0.0494246	hypo	9
chr10	112597938	112618305	144	-0.0571429	0.669002	0.726145	0.0218052	hypo	9
chr3	12037983	12058895	147	-0.0594035	0.725625	0.785028	0.0231198	hypo	9
chr20	640192	652482	129	-0.0908034	0.450499	0.541302	0.0314262	hypo	9
chr15	67365019	67379076	156	-0.0555069	0.545719	0.601225	0.0230185	hypo	9
chr12	27379433	27402082	142	-0.0886233	0.623487	0.71211	0.0329764	hypo	9
chr2	224897870	224908118	141	-0.0642067	0.551678	0.615885	0.0240602	hypo	9
chr17	53508040	53526262	146	-0.0810378	0.807202	0.88824	0.031153	hypo	9
chr13	19684922	19700251	146	-0.0526258	0.77811	0.830736	0.0204844	hypo	9
chr15	65645524	65658343	141	-0.0595849	0.69235	0.751935	0.0224136	hypo	9
chr4	26021588	26036616	167	-0.0668337	0.75266	0.819494	0.0297324	hypo	9
chr4	58299453	58317650	150	-0.0489159	0.704359	0.753275	0.0195167	hypo	9
chr8	25482480	25497147	144	-0.062097	0.747832	0.809929	0.0237933	hypo	9
chr2	102755563	102768340	153	-0.0744319	0.681073	0.755505	0.0304982	hypo	9
chr16	77750376	77761096	148	-0.0816744	0.72899	0.810664	0.0321965	hypo	9
chr9	101549223	101561127	145	-0.10628	0.714342	0.820622	0.0416833	hypo	9
chr10	94176130	94188472	146	-0.0868584	0.655031	0.741889	0.0336345	hypo	9
chr13	48886769	48902708	124	-0.128797	0.615083	0.74388	0.042359	hypo	9
chr1	33448822	33464800	130	-0.07376	0.766331	0.840091	0.0255645	hypo	9
chr11	45416075	45433131	146	-0.0744707	0.706699	0.78117	0.0290231	hypo	9
chr4	113733646	113750938	130	-0.0560315	0.810294	0.866325	0.0195167	hypo	9
chr9	91428853	91448511	169	-0.0500569	0.761252	0.811309	0.0226865	hypo	9
chr17	7292509	7303425	156	-0.0735672	0.61409	0.687657	0.0308735	hypo	9
chr19	39435438	39446300	131	-0.108588	0.71158	0.820167	0.0383438	hypo	9
chr15	97511525	97534877	159	-0.0500036	0.777739	0.827743	0.0213518	hypo	9
chr2	110060644	110073403	157	-0.0498947	0.819243	0.869137	0.0210406	hypo	9
chr1	159907806	159921548	146	-0.096595	0.573684	0.67028	0.0381898	hypo	9
chr1	31641106	31655558	142	-0.0820183	0.653267	0.735285	0.0314935	hypo	9
chr18	37964442	37991925	166	-0.0464222	0.787644	0.834066	0.0207338	hypo	9
chr10	38039384	38069621	147	-0.06372	0.741996	0.805716	0.0252056	hypo	8
chr4	154804892	154832566	156	-0.0473214	0.764107	0.811429	0.0198857	hypo	9
chr15	55608149	55619124	144	-0.0691564	0.631774	0.70093	0.0267763	hypo	9
chr11	120977935	120993071	155	-0.0589901	0.703099	0.762089	0.0246326	hypo	9
chr2	115425716	115451345	127	-0.0696611	0.749514	0.819175	0.0240845	hypo	9
chr15	91065110	91079002	149	-0.101936	0.669766	0.771703	0.0406833	hypo	9
chr3	38584642	38596016	141	-0.0564187	0.856653	0.913072	0.0214414	hypo	9
chr1	25761611	25773972	89	-0.117182	0.767375	0.884558	0.0279603	hypo	9
chr19	10752571	10762911	128	-0.116672	0.572908	0.68958	0.0403414	hypo	9
chr15	54039260	54059339	127	-0.062299	0.719681	0.78198	0.0213518	hypo	9
chr4	62160803	62192203	159	-0.0454743	0.802973	0.848447	0.0195167	hypo	8
chr11	22680935	22700014	128	-0.100039	0.649139	0.749178	0.0345041	hypo	9
chr15	65355445	65367160	133	-0.0677678	0.706693	0.774461	0.0245695	hypo	9
chr2	237463832	237476476	133	-0.0674618	0.616607	0.684069	0.0244052	hypo	9
chr7	140976001	140994128	159	-0.0511559	0.785308	0.836464	0.0219747	hypo	9
chr8	135833671	135847077	154	-0.0806855	0.55661	0.637295	0.0334649	hypo	9
chr19	5391461	5402835	146	-0.100186	0.520004	0.62019	0.0394893	hypo	9
chr4	110937055	110957723	134	-0.0548484	0.799079	0.853927	0.0198363	hypo	9
chr5	13525863	13555431	143	-0.0558603	0.774411	0.830271	0.0216101	hypo	8
chr9	112671083	112686644	116	-0.0749277	0.712606	0.787533	0.0235175	hypo	9
chr2	128573888	128591081	132	-0.0863618	0.7409	0.827262	0.0310098	hypo	9
chr4	3487581	3499646	135	-0.0558353	0.633457	0.689293	0.0203937	hypo	9
chr11	101449448	101462941	119	-0.0909809	0.528576	0.619557	0.0294478	hypo	9
chr3	55578545	55592787	145	-0.0545051	0.800081	0.854586	0.0214517	hypo	9
chr4	48902862	48920134	145	-0.0857776	0.729953	0.815731	0.0336953	hypo	9
chr8	142423510	142434863	150	-0.0691965	0.655025	0.724222	0.0282529	hypo	9
chr8	99178265	99189517	141	-0.0572706	0.786314	0.843585	0.0219414	hypo	9
chr4	40254659	40267827	142	-0.0505162	0.86955	0.920067	0.0195167	hypo	9
chr1	150529092	150540999	143	-0.0689905	0.491696	0.560687	0.0271452	hypo	9
chr12	9941712	9968761	169	-0.0511988	0.729588	0.780786	0.0235633	hypo	9
chr7	128698335	128714145	144	-0.0562041	0.762814	0.819019	0.0220615	hypo	9
chr7	34060655	34088977	159	-0.0506887	0.801166	0.851855	0.0219703	hypo	9
chr13	114573561	114585506	150	-0.0571335	0.802884	0.860018	0.0235635	hypo	9
chr3	49582268	49598655	135	-0.0905684	0.556186	0.646754	0.0333819	hypo	9
chr13	31177947	31188367	100	-0.0783209	0.699378	0.777699	0.0212308	hypo	9
chr2	47542004	47557830	169	-0.0468938	0.812106	0.859	0.0216577	hypo	9
chr6	78348150	78367842	133	-0.0625511	0.70583	0.768381	0.0227319	hypo	9
chr21	33647990	33658929	144	-0.108803	0.587604	0.696407	0.0428755	hypo	9
chr18	73913021	73926781	157	-0.0481717	0.771533	0.819705	0.0207249	hypo	9
chr2	176859289	176876272	159	-0.0691933	0.587888	0.657081	0.0301245	hypo	9
chr20	31032712	31043308	162	-0.0530398	0.756811	0.809851	0.0235146	hypo	9
chr7	26436092	26446473	116	-0.117798	0.586321	0.704119	0.0378417	hypo	9
chr2	75509658	75539558	153	-0.052257	0.847408	0.899665	0.0219104	hypo	8
chr2	218996812	219019085	169	-0.0454054	0.816138	0.861544	0.0210406	hypo	9
chr9	110360985	110378373	161	-0.0535453	0.84895	0.902495	0.0236763	hypo	9
chr9	74382924	74393434	140	-0.0639496	0.55421	0.61816	0.0246997	hypo	9
chr6	26167487	26177836	147	-0.0592036	0.429176	0.488379	0.0239945	hypo	9
chr5	62735076	62772662	164	-0.0625918	0.743805	0.806397	0.0281848	hypo	8
chr2	212449705	212473842	163	-0.0479089	0.807709	0.855618	0.021478	hypo	9
chr20	30866851	30880886	145	-0.0873092	0.714232	0.801541	0.0351497	hypo	9
chr8	38956126	38976455	151	-0.0714055	0.770719	0.842124	0.029594	hypo	9
chr10	53736131	53773165	172	-0.0456333	0.765971	0.811605	0.0216161	hypo	8
chr20	56319528	56330951	148	-0.0560791	0.738976	0.795055	0.0228851	hypo	9
chr6	90056723	90072440	149	-0.144974	0.389307	0.534281	0.0598333	hypo	8
chr3	133388406	133400219	126	-0.0729394	0.627564	0.700503	0.0256251	hypo	9
chr17	38717441	38735991	125	-0.121882	0.506885	0.628767	0.0420913	hypo	8
chr2	1396462	1409656	151	-0.052397	0.785228	0.837625	0.0218455	hypo	9
chr9	123056281	123079388	156	-0.0529747	0.78039	0.833365	0.0228083	hypo	9
chr1	19055732	19068616	151	-0.0681518	0.699287	0.767439	0.0286343	hypo	9
chr4	102705687	102729765	139	-0.0510325	0.601025	0.652058	0.0196257	hypo	9
chr17	68160616	68171552	144	-0.0973366	0.537585	0.634921	0.0385398	hypo	9
chr17	15237107	15249024	133	-0.0764924	0.635668	0.71216	0.0281263	hypo	9
chr10	6009716	6023941	168	-0.0880939	0.56521	0.653304	0.040986	hypo	9
chr18	24217249	24230084	147	-0.0512122	0.693793	0.745005	0.0209015	hypo	9
chr2	119131019	119155941	171	-0.0444261	0.792662	0.837088	0.0210406	hypo	9
chr5	146095027	146121895	144	-0.0541771	0.802733	0.85691	0.0216101	hypo	9
chr6	36811485	36822139	133	-0.0915059	0.701519	0.793025	0.0343847	hypo	9
chr6	94134798	94158472	104	-0.112854	0.647546	0.7604	0.0324234	hypo	8
chr10	3586999	3600186	156	-0.0521272	0.781469	0.833596	0.0225497	hypo	9
chr16	4890405	4902171	152	-0.0781284	0.503673	0.581802	0.0329881	hypo	9
chr15	63336403	63350369	156	-0.0537622	0.485565	0.539327	0.0232319	hypo	9
chr1	182552215	182566893	151	-0.0592741	0.748938	0.808212	0.0249181	hypo	9
chr9	98526917	98538291	145	-0.056312	0.780236	0.836548	0.0226865	hypo	9
chr8	36124576	36152910	170	-0.0679449	0.756277	0.824222	0.0320417	hypo	8
chr10	120512238	120522823	137	-0.0994561	0.480612	0.580068	0.0379213	hypo	9
chr4	94750181	94761594	171	-0.0412886	0.280679	0.321968	0.0196326	hypo	9
chr2	239725502	239742616	130	-0.0615539	0.754614	0.816168	0.0224959	hypo	9
chr3	37810483	37830978	158	-0.0486867	0.808334	0.857021	0.0214414	hypo	9
chr1	154599338	154612236	130	-0.0730819	0.630931	0.704013	0.0267993	hypo	9
chr3	65178381	65207517	168	-0.0457364	0.806303	0.85204	0.0214414	hypo	9
chr13	78425856	78453644	134	-0.0526057	0.822933	0.875539	0.0196768	hypo	9
chr6	131998789	132019256	148	-0.0548606	0.765233	0.820094	0.0226636	hypo	9
chr3	184397720	184409102	149	-0.0593431	0.742684	0.802028	0.0248428	hypo	9
chr2	233239548	233251214	144	-0.0765376	0.721495	0.798032	0.0310722	hypo	9
chr6	14658161	14671155	125	-0.0858149	0.729285	0.8151	0.0297738	hypo	9
chr1	40255261	40269489	143	-0.0994235	0.708945	0.808369	0.0392327	hypo	9
chr13	39944135	39965120	158	-0.0445216	0.847096	0.891617	0.0196768	hypo	9
chr2	232248105	232259566	147	-0.0511331	0.69531	0.746443	0.0210414	hypo	9
chr2	80213656	80237261	143	-0.0525384	0.698082	0.75062	0.0210406	hypo	9
chr3	113926443	113942995	126	-0.0643841	0.660915	0.7253	0.0227451	hypo	9
chr1	20895158	20907676	139	-0.0646883	0.7779	0.842588	0.0252296	hypo	9
chr10	99781153	99796215	142	-0.0657182	0.47829	0.544008	0.0262703	hypo	9
chr14	64191084	64203746	141	-0.0984459	0.532596	0.631041	0.0389885	hypo	9
chr18	2217418	2247188	149	-0.0479274	0.796496	0.844423	0.0200453	hypo	8
chr20	4241250	4272899	156	-0.0538772	0.826171	0.880048	0.0236594	hypo	8
chr1	109283540	109293877	125	-0.0710334	0.650645	0.721678	0.0249131	hypo	9
chr1	3259677	3269935	148	-0.0597306	0.788217	0.847947	0.0249117	hypo	9
chr1	109726151	109738892	155	-0.0539453	0.773366	0.827312	0.0235113	hypo	9
chr2	131784595	131795157	131	-0.0864537	0.554086	0.64054	0.0317933	hypo	9
chr3	9391452	9405862	132	-0.100694	0.687049	0.787744	0.0385225	hypo	9
chr8	139882802	139898590	150	-0.0523619	0.806503	0.858865	0.0221259	hypo	9
chr14	53251712	53261937	140	-0.0717116	0.633174	0.704886	0.0281382	hypo	9
chr1	161991927	162004831	148	-0.0799119	0.644513	0.724425	0.0330984	hypo	9
chr1	147775568	147786969	127	0.0698732	0.666105	0.596232	0.0250173	hyper	9
chr2	118493809	118523545	144	-0.051854	0.777857	0.829711	0.0210406	hypo	8
chr2	29862576	29888337	146	-0.0517283	0.814941	0.86667	0.0213093	hypo	9
chr4	104628577	104655328	135	-0.0533899	0.698291	0.751681	0.0203362	hypo	9
chr18	67066160	67076591	138	-0.079683	0.501988	0.581671	0.0313425	hypo	9
chr11	117876535	117887975	119	-0.116264	0.555256	0.67152	0.039182	hypo	9
chr18	72266016	72278081	115	-0.0904276	0.693418	0.783846	0.0300795	hypo	9
chr8	38128372	38144397	132	-0.0789658	0.650328	0.729293	0.0296517	hypo	9
chr18	47481685	47500449	161	-0.0439502	0.797176	0.841127	0.0200453	hypo	9
chr10	111508397	111537321	154	-0.0498905	0.758022	0.807912	0.0217867	hypo	9
chr3	134365052	134377254	124	-0.0641191	0.683169	0.747288	0.0225237	hypo	9
chr12	114022122	114036728	139	-0.0788572	0.623359	0.702216	0.0310901	hypo	9
chr14	22846180	22865920	160	-0.0477244	0.715649	0.763373	0.0217046	hypo	9
chr12	52982406	52999332	146	-0.0596264	0.727171	0.786798	0.0246974	hypo	9
chr6	29747389	29767394	106	-0.0807268	0.653182	0.733909	0.0244494	hypo	9
chr18	7441604	7455642	151	-0.050478	0.832802	0.88328	0.0216268	hypo	9
chr5	86560248	86574279	134	-0.0786572	0.69185	0.770507	0.0303707	hypo	9
chr15	40831689	40847958	148	-0.0647211	0.781324	0.846045	0.0271511	hypo	9
chr1	31702337	31715279	131	-0.12163	0.570237	0.691867	0.0451429	hypo	9
chr11	61846699	61858643	109	0.0794169	0.836227	0.75681	0.0246622	hyper	9
chr9	35784594	35797008	133	-0.0597808	0.815232	0.875012	0.0226866	hypo	9
chr10	86292449	86304073	129	-0.0590878	0.678322	0.73741	0.0217672	hypo	9
chr6	164817337	164840002	145	-0.0544501	0.777515	0.831965	0.0225288	hypo	9
chr14	62923091	62952854	157	-0.0484464	0.764436	0.812882	0.0217046	hypo	8
chr13	34075126	34099511	120	-0.0612058	0.848857	0.910063	0.021137	hypo	9
chr7	18567101	18588951	131	-0.0665625	0.697143	0.763706	0.0248211	hypo	9
chr6	137479565	137499562	116	-0.067938	0.755658	0.823596	0.0225288	hypo	9
chr18	52373282	52395549	145	-0.0495165	0.744604	0.79412	0.0205333	hypo	9
chr7	24128742	24159043	138	-0.0555731	0.812406	0.867979	0.0219556	hypo	8
chr8	138813041	138847836	136	-0.0558807	0.794278	0.850158	0.0217581	hypo	8
chr4	130181877	130207851	135	-0.0504408	0.810056	0.860497	0.0195167	hypo	9
chr9	94708639	94718788	131	-0.0752707	0.505635	0.580906	0.0285979	hypo	9
chr14	91276970	91289501	147	-0.0786158	0.702247	0.780863	0.033037	hypo	9
chr17	38746586	38760920	147	-0.0791057	0.688652	0.767757	0.0332998	hypo	9
chr3	12002806	12018252	157	-0.0475179	0.835246	0.882764	0.0214414	hypo	9
chr14	24880092	24893953	161	-0.0470537	0.744923	0.791977	0.0217794	hypo	9
chr1	112051523	112063588	121	-0.0678022	0.636778	0.70458	0.0235767	hypo	9
chr14	77588860	77599208	133	-0.0596066	0.393646	0.453253	0.0229002	hypo	9
chr5	92953230	92964363	118	-0.0821294	0.539781	0.62191	0.0277803	hypo	9
chr18	3789744	3804133	147	-0.047572	0.780599	0.828171	0.0201582	hypo	9
chr6	91081067	91099985	125	-0.0624844	0.693029	0.755514	0.0225288	hypo	9
chr2	52692697	52722894	133	-0.0569217	0.780021	0.836943	0.0219152	hypo	8
chr17	65985723	65999714	131	-0.100854	0.472004	0.572858	0.0381002	hypo	9
chr10	80906620	80917928	139	-0.056339	0.709841	0.76618	0.0225936	hypo	9
chr16	24501010	24514791	132	-0.0682694	0.742416	0.810685	0.0260109	hypo	9
chr8	55355193	55367173	121	-0.0701683	0.580674	0.650842	0.0248032	hypo	9
chr16	49044327	49056918	153	-0.0588678	0.655433	0.7143	0.0260109	hypo	9
chr11	8605497	8623578	115	-0.0936412	0.693075	0.786716	0.0310989	hypo	9
chr11	85923678	85942663	119	-0.072924	0.749595	0.822519	0.0250558	hypo	9
chr9	95705993	95717710	146	-0.0610274	0.758965	0.819992	0.0259292	hypo	9
chr2	15696896	15708186	143	-0.0558179	0.58424	0.640058	0.0231279	hypo	9
chr11	57405553	57416958	154	-0.0655612	0.41196	0.477522	0.029397	hypo	9
chr11	113739744	113749781	154	-0.0953757	0.573771	0.669147	0.042653	hypo	9
chr18	3850610	3870855	160	-0.0431472	0.844499	0.887647	0.0200453	hypo	9
chr8	13129037	13143502	131	-0.0596365	0.74186	0.801496	0.0227557	hypo	9
chr16	69413303	69423991	136	-0.10358	0.633118	0.736699	0.0407998	hypo	9
chr4	42142927	42154191	131	-0.0592598	0.589977	0.649237	0.0226538	hypo	9
chr1	110365072	110384257	156	-0.0518285	0.822154	0.873982	0.0235113	hypo	9
chr6	30913449	30925600	121	-0.0966411	0.619941	0.716582	0.0343132	hypo	9
chr6	105380732	105393568	128	-0.0866797	0.655883	0.742563	0.0323497	hypo	9
chr18	35096949	35107425	135	-0.0626657	0.653184	0.71585	0.0248154	hypo	9
chr13	106278682	106301156	147	-0.0459347	0.830617	0.876552	0.0196768	hypo	9
chr22	22859162	22872135	138	-0.06711	0.617266	0.684376	0.0270311	hypo	9
chr4	189442557	189459890	155	-0.0432602	0.814053	0.857313	0.0195503	hypo	9
chr20	21103744	21116353	142	-0.0551465	0.709632	0.764779	0.0228557	hypo	9
chr15	65061813	65073392	124	-0.104964	0.565804	0.670769	0.0374129	hypo	9
chr2	86076781	86087362	111	-0.0667648	0.718477	0.785242	0.0217084	hypo	9
chr14	24807151	24818044	132	-0.0643077	0.590389	0.654697	0.0247446	hypo	9
chr11	120512612	120526376	145	-0.0581605	0.768474	0.826635	0.0246326	hypo	9
chr2	7513394	7529579	117	-0.0615622	0.775372	0.836935	0.0210406	hypo	9
chr21	40715125	40725366	143	-0.0906794	0.54226	0.63294	0.0379199	hypo	9
chr2	64538375	64553861	141	-0.0523264	0.83027	0.882596	0.0216115	hypo	9
chr9	100840539	100852446	136	-0.057035	0.859896	0.916931	0.0226865	hypo	9
chr3	120264584	120283217	150	-0.0585628	0.686786	0.745349	0.0258585	hypo	9
chr12	76413229	76425261	142	-0.0590605	0.456525	0.515586	0.0246541	hypo	9
chr18	43781674	43797797	137	-0.0500543	0.781775	0.831829	0.0201035	hypo	9
chr3	172655837	172678096	150	-0.0487152	0.819838	0.868553	0.0214414	hypo	9
chr1	10856066	10867075	121	-0.088014	0.492155	0.580169	0.0312593	hypo	9
chr6	100176345	100202408	129	-0.0594773	0.755943	0.81542	0.0225288	hypo	9
chr10	126050299	126060433	137	-0.0548555	0.744777	0.799632	0.0221371	hypo	9
chr17	36731921	36743914	134	-0.0754654	0.468381	0.543847	0.0296972	hypo	9
chr22	50602855	50614180	134	-0.0782616	0.710995	0.789256	0.0310493	hypo	9
chr7	32461581	32475084	132	-0.064415	0.580674	0.645089	0.0249865	hypo	9
chr2	182506135	182525691	128	-0.070089	0.769527	0.839616	0.0268438	hypo	9
chr1	196570350	196591018	142	-0.0591538	0.710539	0.769693	0.0247581	hypo	9
chr12	128702929	128718372	139	-0.0578604	0.74951	0.80737	0.0237195	hypo	9
chr1	116507359	116523702	134	-0.0641536	0.714833	0.778986	0.0253485	hypo	9
chr17	20947900	20959488	145	-0.0638818	0.62653	0.690412	0.0273495	hypo	9
chr3	170490812	170519815	140	-0.0517861	0.839867	0.891653	0.0214414	hypo	9
chr4	140809331	140824178	151	-0.0469877	0.841795	0.888783	0.0209438	hypo	9
chr10	45951715	45963654	139	-0.0549894	0.737956	0.792945	0.0225627	hypo	9
chr5	67431258	67450129	126	-0.0580126	0.852153	0.910166	0.0216536	hypo	9
chr9	126960113	126971658	131	-0.0596683	0.680684	0.740352	0.0232321	hypo	9
chr15	41844884	41858927	154	-0.0632403	0.677917	0.741157	0.0288045	hypo	9
chr5	169923158	169935237	102	-0.0925666	0.689066	0.781632	0.0279699	hypo	9
chr2	220019848	220033549	144	-0.117649	0.653866	0.771515	0.0508179	hypo	9
chr2	22410196	22436146	136	-0.0521216	0.785221	0.837342	0.0210406	hypo	9
chr14	97234090	97250115	154	-0.047514	0.806767	0.854281	0.0217219	hypo	9
chr16	11451253	11461877	146	-0.0715811	0.689717	0.761298	0.0309637	hypo	9
chr11	44579112	44591335	149	-0.062631	0.503188	0.565819	0.0277123	hypo	9
chr1	206728648	206740959	127	-0.06232	0.564599	0.626919	0.0235113	hypo	9
chr13	53543097	53563220	137	-0.0483276	0.780102	0.82843	0.0196768	hypo	9
chr9	8172249	8204577	146	-0.0522709	0.808637	0.860908	0.0226865	hypo	8
chr2	224752899	224765908	117	-0.0616101	0.752344	0.813954	0.0214455	hypo	9
chr18	23466903	23483089	125	-0.0543321	0.766353	0.820685	0.0201854	hypo	9
chr4	93908332	93942170	151	-0.0443646	0.819585	0.86395	0.0199228	hypo	8
chr11	124814280	124832791	141	-0.0854296	0.620451	0.705881	0.0357661	hypo	9
chr21	16428110	16443820	144	-0.0493035	0.325008	0.374312	0.021119	hypo	9
chr1	93436464	93448291	110	-0.0825074	0.613987	0.696494	0.0270726	hypo	9
chr2	118769627	118784071	143	-0.104234	0.574489	0.678723	0.0442296	hypo	9
chr14	56043726	56053835	129	-0.089458	0.431777	0.521235	0.0344351	hypo	9
chr8	24214591	24246306	153	-0.0477744	0.764272	0.812047	0.0217581	hypo	8
chr12	99384747	99403276	155	-0.0508092	0.811649	0.862458	0.023448	hypo	9
chr5	175838899	175849732	124	-0.0687205	0.717671	0.786391	0.0253991	hypo	9
chr15	74037195	74050598	133	-0.0718267	0.536259	0.608086	0.0283438	hypo	9
chr1	177386872	177415633	149	-0.0528593	0.787509	0.840368	0.0235113	hypo	9
chr20	44962270	44972534	148	-0.0516894	0.722291	0.77398	0.0228557	hypo	9
chr10	57389046	57402394	126	-0.071776	0.412346	0.484122	0.0268064	hypo	9
chr20	2531038	2544570	142	-0.0558256	0.737097	0.792923	0.0237569	hypo	9
chr16	68495418	68509031	116	-0.0801345	0.721326	0.80146	0.0278199	hypo	9
chr10	88017185	88031965	146	-0.075723	0.670262	0.745985	0.0333006	hypo	9
chr2	29465012	29478575	136	-0.0517147	0.805999	0.857714	0.0210406	hypo	9
chr3	186359338	186381473	120	-0.0597858	0.808678	0.868464	0.0214794	hypo	9
chr12	100270226	100295142	157	-0.048369	0.810196	0.858565	0.0227522	hypo	9
chr4	115194463	115234414	148	-0.0440132	0.807506	0.85152	0.0195167	hypo	8
chr5	60131876	60143921	125	-0.159044	0.580337	0.739381	0.0599734	hypo	8
chr11	115834006	115853447	133	0.0649399	0.770134	0.705194	0.0258835	hyper	9
chr1	165129179	165151887	149	-0.0526432	0.753926	0.806569	0.0235462	hypo	9
chr14	105392040	105405283	139	-0.0717387	0.658838	0.730577	0.0299546	hypo	9
chr10	3520663	3531193	147	-0.0578499	0.69667	0.75452	0.0256915	hypo	9
chr19	44483760	44493974	138	-0.0890501	0.656845	0.745895	0.0369551	hypo	9
chr6	47749714	47768133	144	-0.0523237	0.735556	0.78788	0.0226727	hypo	9
chr3	13456077	13466245	140	-0.0976835	0.416002	0.513686	0.0411488	hypo	9
chr7	64694020	64704400	116	-0.0632674	0.718438	0.781706	0.0221023	hypo	9
chr5	169757946	169769454	123	-0.0633934	0.693072	0.756465	0.0236745	hypo	9
chr8	21523120	21535766	133	-0.054261	0.787585	0.841846	0.0217581	hypo	9
chr10	119702999	119724227	143	-0.050135	0.769187	0.819322	0.0216161	hypo	9
chr7	54727526	54742343	138	-0.0550385	0.643052	0.698091	0.0229616	hypo	9
chr1	202656865	202672157	133	-0.0593633	0.705349	0.764713	0.0238492	hypo	9
chr2	42351764	42361881	114	-0.0622704	0.641692	0.703963	0.0214877	hypo	9
chr2	101503447	101515636	149	-0.0467884	0.823027	0.869815	0.0210406	hypo	9
chr22	42302779	42314681	141	-0.0638717	0.355143	0.419015	0.0271901	hypo	9
chr12	9389499	9408619	126	-0.0630384	0.790216	0.853254	0.0240987	hypo	9
chr3	15666325	15678588	132	-0.0537796	0.800122	0.853902	0.0214414	hypo	9
chr5	1732376	1747334	142	-0.0504337	0.786579	0.837013	0.0216425	hypo	9
chr1	33334811	33347228	122	-0.0930152	0.598919	0.691935	0.0341415	hypo	9
chr22	27518356	27530489	150	-0.0563162	0.720583	0.776899	0.0255426	hypo	9
chr17	12875477	12885853	156	-0.0675592	0.718752	0.786311	0.0318936	hypo	9
chr15	69208623	69227889	130	-0.0637556	0.798899	0.862654	0.0250983	hypo	9
chr13	20976394	20990149	145	-0.0449926	0.804854	0.849847	0.0197572	hypo	9
chr10	87728656	87750592	147	-0.0485182	0.79909	0.847608	0.0216161	hypo	9
chr2	178251395	178267733	138	-0.102701	0.631563	0.734263	0.0429143	hypo	9
chr12	103309658	103333217	118	-0.0667839	0.742557	0.809341	0.0238531	hypo	9
chr12	13540262	13568373	152	-0.0493159	0.801382	0.850698	0.0227522	hypo	9
chr18	10894376	10906778	136	-0.0486505	0.784745	0.833396	0.0200902	hypo	9
chr13	44863654	44882399	149	-0.0435609	0.813945	0.857506	0.0197088	hypo	9
chr7	71303421	71319862	120	-0.0603231	0.811309	0.871632	0.0219776	hypo	9
chr19	14157020	14170281	152	-0.0828343	0.745337	0.828171	0.0382127	hypo	9
chr9	103571496	103604580	149	-0.0500794	0.787284	0.837364	0.0226865	hypo	8
chr8	77911700	77926505	141	-0.0600184	0.567993	0.628011	0.0258143	hypo	9
chr13	44564794	44589459	145	-0.0445839	0.844044	0.888628	0.0196768	hypo	9
chr10	126270640	126282671	143	-0.0546723	0.790286	0.844958	0.0237761	hypo	9
chr8	98430504	98450232	150	-0.0500681	0.811902	0.861971	0.022901	hypo	9
chr14	21238699	21258083	152	-0.0494043	0.7396	0.789005	0.0228837	hypo	9
chr5	52775827	52786484	125	-0.114979	0.430988	0.545967	0.0448135	hypo	9
chr3	180702012	180716214	138	-0.0747087	0.665169	0.739878	0.0314657	hypo	9
chr1	181099198	181109905	115	-0.0669398	0.569824	0.636764	0.0235113	hypo	9
chr4	185256140	185268975	119	-0.061458	0.627798	0.689256	0.0225845	hypo	9
chr7	111318503	111343185	135	-0.05322	0.813365	0.866585	0.0219556	hypo	9
chr4	7531097	7541146	147	-0.0437268	0.756403	0.80013	0.0196701	hypo	9
chr13	111233791	111246060	132	-0.0487202	0.831094	0.879814	0.0196768	hypo	9
chr1	11401879	11412002	145	-0.0529976	0.695867	0.748864	0.0235183	hypo	9
chr17	72828702	72838960	128	-0.080351	0.728679	0.80903	0.0315167	hypo	9
chr17	39554999	39569515	143	-0.0621444	0.824192	0.886337	0.027202	hypo	9
chr20	56876823	56887517	123	-0.116625	0.609237	0.725862	0.0438627	hypo	9
chr16	28190631	28204750	123	-0.0898079	0.696148	0.785956	0.0338599	hypo	9
chr3	71524907	71538274	132	-0.0534434	0.854353	0.907797	0.0216312	hypo	9
chr4	146646309	146658577	135	-0.0610467	0.741316	0.802362	0.0251973	hypo	9
chr4	116254896	116291969	143	-0.044486	0.812103	0.856589	0.0195167	hypo	8
chr1	64928736	64939674	129	-0.102219	0.514253	0.616472	0.0404505	hypo	9
chr13	52089928	52113120	140	-0.0457952	0.841592	0.887388	0.0196768	hypo	9
chr13	72433428	72444448	123	-0.0760341	0.293855	0.369889	0.0287624	hypo	9
chr12	57521770	57534844	121	-0.073286	0.660438	0.733724	0.0273432	hypo	9
chr3	38620648	38632634	123	-0.0566583	0.81978	0.876439	0.0214414	hypo	9
chr20	266870	277607	130	-0.0829726	0.480984	0.563957	0.03321	hypo	9
chr10	112170911	112185152	124	-0.0566506	0.646496	0.703146	0.0216161	hypo	9
chr1	169545065	169570746	131	-0.060785	0.789	0.849785	0.024506	hypo	9
chr5	5910372	5924780	134	-0.0523861	0.811091	0.863478	0.0216101	hypo	9
chr4	36554017	36588818	140	-0.0478854	0.776727	0.824612	0.0206657	hypo	8
chr2	50566215	50581209	144	-0.0757691	0.536325	0.612094	0.0336944	hypo	9
chr8	126835367	126864052	155	-0.0455536	0.814592	0.860146	0.0217581	hypo	9
chr2	158727768	158741749	114	-0.144126	0.604243	0.748369	0.049915	hypo	9
chr14	37401091	37422341	141	-0.0498929	0.767503	0.817396	0.0217046	hypo	9
chr7	10260611	10302454	138	-0.0515623	0.775442	0.827004	0.0219556	hypo	8
chr3	183156935	183167772	110	-0.0748313	0.669013	0.743844	0.0254139	hypo	9
chr10	6544248	6560061	133	-0.0526013	0.825478	0.878079	0.0216161	hypo	9
chr4	119592562	119607114	126	-0.0685611	0.747175	0.815736	0.0270483	hypo	9
chr18	56332199	56343882	137	-0.0673883	0.569437	0.636826	0.028494	hypo	9
chr16	26068902	26087287	146	-0.0575843	0.729827	0.787412	0.0260109	hypo	9
chr2	121533271	121544453	138	-0.0492303	0.810199	0.859429	0.021041	hypo	9
chr7	104420889	104442164	147	-0.0482082	0.789302	0.83751	0.0219556	hypo	9
chr19	44638935	44649098	140	-0.137324	0.664109	0.801433	0.059689	hypo	9
chr15	84084945	84098079	138	-0.0503081	0.802391	0.852699	0.0215094	hypo	9
chr2	46997308	47012676	139	-0.055769	0.847355	0.903124	0.0240126	hypo	9
chr7	124394451	124410963	128	-0.102737	0.599261	0.701998	0.0406232	hypo	9
chr13	33604351	33619012	107	-0.0628397	0.787906	0.850746	0.0209403	hypo	9
chr16	55489128	55501600	129	-0.0668692	0.70858	0.775449	0.0269317	hypo	9
chr12	48147999	48158814	131	-0.0692763	0.601893	0.67117	0.0283572	hypo	9
chr3	43047447	43067813	128	-0.0537577	0.776921	0.830678	0.0214414	hypo	9
chr17	40907553	40919211	103	-0.0847326	0.727281	0.812013	0.0272182	hypo	9
chr16	26643829	26663398	132	-0.0638518	0.732208	0.79606	0.0263341	hypo	9
chr4	46511576	46541142	148	-0.0422056	0.780585	0.822791	0.0195167	hypo	8
chr4	82524431	82549095	133	-0.0469343	0.772348	0.819282	0.0195167	hypo	9
chr8	110538654	110556166	128	-0.0669297	0.662127	0.729057	0.02683	hypo	9
chr12	113980724	113996324	129	-0.0563697	0.759419	0.815789	0.0227522	hypo	9
chr13	28010138	28021259	121	-0.127511	0.573238	0.700749	0.0481024	hypo	9
chr16	29616133	29635027	112	-0.114912	0.524074	0.638986	0.0410801	hypo	9
chr7	98735109	98746299	123	-0.0752362	0.701489	0.776725	0.028825	hypo	9
chr5	95736890	95754594	136	-0.0624598	0.820486	0.882946	0.02653	hypo	9
chr7	87097968	87114353	110	-0.0800171	0.675514	0.755531	0.0274649	hypo	9
chr10	73079319	73091278	133	-0.051829	0.766532	0.818361	0.0216161	hypo	9
chr4	64716541	64746433	135	-0.0460778	0.763987	0.810065	0.0195167	hypo	8
chr18	35060909	35073840	138	-0.0735145	0.431721	0.505235	0.0322	hypo	9
chr8	91789291	91806313	131	-0.0584413	0.670637	0.729078	0.024078	hypo	9
chr21	39736969	39754920	137	-0.0516284	0.686125	0.737754	0.02219	hypo	9
chr9	5324283	5350594	133	-0.054266	0.818042	0.872308	0.0226865	hypo	9
chr9	2157105	2167575	107	-0.0829401	0.591404	0.674344	0.0277184	hypo	9
chr4	10262233	10278484	134	-0.0468701	0.774311	0.821181	0.0197646	hypo	9
chr6	84215924	84231248	131	-0.0566942	0.722375	0.779069	0.0233728	hypo	9
chr17	55901245	55912667	134	-0.0682523	0.807476	0.875728	0.0288098	hypo	9
chr5	113448139	113478686	152	-0.0464893	0.787766	0.834256	0.0222443	hypo	8
chr7	67311759	67325665	136	-0.0527635	0.78424	0.837004	0.0226428	hypo	9
chr1	57421757	57439327	135	-0.0553119	0.785564	0.840876	0.0235163	hypo	9
chr15	71891245	71910681	137	-0.0494406	0.798694	0.848134	0.0213518	hypo	9
chr14	30399576	30424744	133	-0.0767495	0.688551	0.765301	0.0322855	hypo	9
chr6	31264521	31280187	129	-0.0565585	0.719314	0.775872	0.0230523	hypo	9
chr3	51381734	51400248	139	-0.0488746	0.852008	0.900883	0.0214419	hypo	9
chr11	268334	280325	144	-0.0691529	0.435008	0.504161	0.0314764	hypo	9
chr2	233178257	233189229	132	-0.0506378	0.730371	0.781009	0.0211071	hypo	9
chr1	22391035	22404434	131	-0.0608699	0.797408	0.858278	0.025253	hypo	9
chr1	29760536	29773842	145	-0.0513297	0.736195	0.787524	0.0235113	hypo	9
chr14	87624848	87651207	147	-0.0467134	0.771719	0.818432	0.0217046	hypo	9
chr5	114377471	114410227	142	-0.0532814	0.79094	0.844221	0.0239098	hypo	8
chr15	98740134	98759262	142	-0.0475651	0.821281	0.868846	0.0213518	hypo	9
chr9	33259124	33270518	134	-0.0850981	0.483341	0.568439	0.0360597	hypo	9
chr10	103014523	103027847	128	-0.0533469	0.795223	0.84857	0.0216176	hypo	9
chr4	41175413	41194730	126	-0.048916	0.866243	0.915159	0.0195167	hypo	9
chr7	75826827	75837890	107	-0.0837794	0.634993	0.718773	0.0284527	hypo	9
chr3	159702236	159714435	106	-0.0650138	0.675447	0.740461	0.0218586	hypo	9
chr10	72576517	72593950	126	-0.0665826	0.794831	0.861414	0.0267242	hypo	9
chr4	39022802	39038032	116	-0.053931	0.726163	0.780094	0.0198657	hypo	9
chr20	41065459	41082778	147	-0.0495443	0.781943	0.831488	0.0231347	hypo	9
chr2	233967107	233977979	122	-0.0547817	0.745149	0.799931	0.0212588	hypo	9
chr2	29672527	29693686	138	-0.0478383	0.794262	0.8421	0.0210406	hypo	9
chr8	118171224	118200026	138	-0.0494616	0.743563	0.793024	0.0217581	hypo	9
chr13	29212032	29225021	111	-0.0748641	0.74834	0.823204	0.0265575	hypo	9
chr8	47588427	47638973	117	-0.0624307	0.694213	0.756644	0.0232472	hypo	6
chr10	15581504	15598295	133	-0.0509677	0.816143	0.867111	0.0216161	hypo	9
chr6	33876855	33890610	132	-0.0594813	0.742454	0.801936	0.0251195	hypo	9
chr7	93549101	93561897	128	-0.0540785	0.709219	0.763298	0.0220851	hypo	9
chr21	21413689	21442876	128	-0.0516537	0.812972	0.864626	0.0210946	hypo	9
chr4	143044951	143073884	145	-0.0421829	0.841937	0.88412	0.0195167	hypo	9
chr4	22682337	22701446	137	-0.0470785	0.765119	0.812198	0.0206056	hypo	9
chr11	60769752	60780074	142	-0.0692806	0.742066	0.811346	0.0314275	hypo	9
chr7	151685934	151697198	132	-0.0519462	0.789426	0.841372	0.0219556	hypo	9
chr4	73176051	73199086	132	-0.0461436	0.819231	0.865375	0.0195167	hypo	9
chr1	186784085	186808665	131	-0.0595307	0.695512	0.755043	0.0249809	hypo	9
chr3	142436592	142450075	118	-0.0796496	0.601651	0.6813	0.0300836	hypo	9
chr10	61398535	61423169	125	-0.0539076	0.823623	0.87753	0.0216161	hypo	9
chr8	37180534	37192735	141	-0.0480841	0.751027	0.799111	0.0217581	hypo	9
chr3	37996510	38012927	138	-0.0484004	0.814795	0.863195	0.0214414	hypo	9
chr5	39418468	39430444	122	-0.0908524	0.627909	0.718762	0.0359553	hypo	9
chr7	6699911	6710020	104	-0.0803632	0.723326	0.803689	0.0266852	hypo	9
chr13	87558268	87578391	122	-0.0501932	0.812294	0.862487	0.0196768	hypo	9
chr12	53965457	53978664	129	-0.0548609	0.854172	0.909033	0.0227522	hypo	9
chr2	16817240	16832623	137	-0.0516586	0.762741	0.8144	0.0227983	hypo	9
chr21	38576168	38588857	126	-0.0532826	0.749027	0.80231	0.0215978	hypo	9
chr6	122200060	122233450	129	-0.0542786	0.792775	0.847054	0.0225288	hypo	8
chr15	29879894	29893302	133	-0.0501494	0.806126	0.856275	0.0214744	hypo	9
chr4	40571948	40583424	112	-0.0688767	0.772825	0.841702	0.0246623	hypo	9
chr1	205189705	205200662	128	-0.0813957	0.485858	0.567254	0.0338131	hypo	9
chr8	54386581	54410147	149	-0.0452826	0.792353	0.837636	0.0217658	hypo	9
chr6	70581254	70600866	129	-0.0726492	0.634383	0.707032	0.0304095	hypo	9
chr20	59333560	59348312	134	-0.0528485	0.777045	0.829894	0.0228557	hypo	9
chr1	24239571	24249967	128	-0.0899985	0.610222	0.70022	0.0373086	hypo	9
chr1	116041995	116070023	110	-0.066143	0.737319	0.803462	0.0235113	hypo	8
chr13	90511309	90533059	143	-0.0425236	0.812966	0.85549	0.0196768	hypo	9
chr11	17565319	17576269	128	-0.0595099	0.663815	0.723325	0.0246668	hypo	9
chr11	2918172	2928733	115	-0.0991155	0.661562	0.760678	0.0377314	hypo	9
chr4	57047633	57064396	144	-0.0418316	0.888407	0.930239	0.0195167	hypo	9
chr20	31740449	31755110	144	-0.0492121	0.809759	0.858971	0.0229798	hypo	9
chr6	20333204	20347224	138	-0.0503764	0.849651	0.900028	0.0225428	hypo	9
chr17	37837150	37847524	135	-0.0869719	0.706776	0.793748	0.0381508	hypo	9
chr2	72071231	72086280	131	-0.0515425	0.761623	0.813166	0.0219232	hypo	9
chr3	139671796	139694568	122	-0.057417	0.755655	0.813072	0.0227421	hypo	9
chr7	101419991	101432368	141	-0.0479285	0.854576	0.902505	0.0219556	hypo	9
chr2	58456962	58472076	126	-0.081096	0.681328	0.762424	0.0333604	hypo	9
chr2	44261802	44274504	110	-0.059857	0.798399	0.858256	0.0213915	hypo	9
chr1	37275875	37289341	143	-0.0505813	0.799134	0.849715	0.0235113	hypo	9
chr12	128037590	128050446	132	-0.0530262	0.739561	0.792587	0.0227522	hypo	9
chr1	183440235	183453551	128	-0.0590606	0.361152	0.420213	0.0246902	hypo	9
chr15	78106668	78117663	130	-0.0938062	0.488393	0.582199	0.0395118	hypo	9
chr4	185772246	185782799	122	-0.0552752	0.659775	0.71505	0.0219132	hypo	9
chr19	53417838	53430261	111	-0.108784	0.651259	0.760043	0.0392746	hypo	9
chr9	95631904	95654611	94	0.0744281	0.792942	0.718514	0.0227911	hyper	9
chr10	77660375	77675635	130	-0.0509576	0.799073	0.850031	0.0216192	hypo	9
chr1	30291374	30306529	139	-0.0518218	0.763935	0.815756	0.0235113	hypo	9
chr2	86563724	86575173	120	-0.0679843	0.540418	0.608402	0.026626	hypo	9
chr9	112308929	112329708	116	-0.0610875	0.733918	0.795006	0.0231277	hypo	9
chr4	65688111	65715056	131	-0.0455409	0.828297	0.873838	0.0195167	hypo	9
chr3	87011326	87029605	125	-0.0524317	0.806494	0.858926	0.0214414	hypo	9
chr11	76129194	76146725	122	-0.0639736	0.855779	0.919753	0.0255576	hypo	9
chr1	37922937	37934951	132	-0.0641836	0.715167	0.779351	0.027796	hypo	9
chr3	112062581	112083684	115	-0.0672615	0.817569	0.88483	0.0255006	hypo	9
chr8	49643334	49653894	112	-0.0672945	0.640583	0.707877	0.0248387	hypo	9
chr2	167503690	167533096	120	-0.0538318	0.79194	0.845772	0.021154	hypo	8
chr3	140166987	140186503	137	-0.0477336	0.797223	0.844957	0.0214414	hypo	9
chr2	68115400	68133175	134	-0.0478603	0.795454	0.843314	0.0210406	hypo	9
chr13	79838006	79862875	127	-0.0472182	0.835502	0.882721	0.0196768	hypo	9
chr1	47638121	47650691	127	-0.0635075	0.649923	0.713431	0.0266734	hypo	9
chr6	138865708	138881580	140	-0.0490365	0.82972	0.878756	0.0225288	hypo	9
chr13	78128111	78147160	131	-0.0457519	0.828849	0.874601	0.0196768	hypo	9
chr2	127887679	127899405	124	-0.051658	0.829701	0.881359	0.0210406	hypo	9
chr6	76597690	76624685	132	-0.0519538	0.818574	0.870528	0.0225288	hypo	9
chr5	134786269	134797232	103	-0.0657163	0.694273	0.75999	0.0223629	hypo	9
chr5	151026045	151041435	136	-0.0483661	0.780041	0.828407	0.0216101	hypo	9
chr14	96972333	96984768	111	-0.0619216	0.710479	0.7724	0.0226755	hypo	9
chr1	22593830	22605375	136	-0.052546	0.775357	0.827903	0.0235151	hypo	9
chr13	40663347	40681050	139	-0.0430201	0.86154	0.90456	0.0196768	hypo	9
chr10	114067143	114079439	138	-0.0475743	0.786654	0.834228	0.0216161	hypo	9
chr1	47874862	47890238	132	-0.123703	0.636311	0.760014	0.0536307	hypo	9
chr10	118489926	118500792	115	-0.0708458	0.634883	0.705729	0.0272705	hypo	9
chr3	102320101	102349454	134	-0.0485625	0.794191	0.842753	0.0214437	hypo	8
chr1	44287864	44305316	126	-0.0566051	0.737437	0.794042	0.0235113	hypo	9
chr15	84127795	84143615	104	-0.0725157	0.795409	0.867925	0.0253334	hypo	9
chr20	51762525	51782636	133	-0.0520719	0.765093	0.817165	0.0228557	hypo	9
chr13	28315172	28329696	118	-0.0505013	0.823178	0.873679	0.0196768	hypo	9
chr2	222817108	222834782	131	-0.0485655	0.811047	0.859612	0.0210406	hypo	9
chr18	53984289	54003907	126	-0.0480922	0.788951	0.837043	0.0200453	hypo	9
chr8	57896666	57907066	119	-0.0599763	0.586381	0.646357	0.0237582	hypo	9
chr14	69088288	69098369	122	-0.0709314	0.680561	0.751493	0.0286295	hypo	9
chr1	118683774	118701788	129	-0.0550328	0.79396	0.848993	0.0235113	hypo	9
chr21	41896703	41913331	135	-0.0471624	0.811041	0.858204	0.0210946	hypo	9
chr1	31841508	31853840	124	-0.0774811	0.666061	0.743542	0.0318685	hypo	9
chr4	185195054	185208202	118	-0.0533464	0.739153	0.7925	0.0210159	hypo	9
chr3	68463114	68488434	139	-0.0464645	0.785232	0.831696	0.0214414	hypo	9
chr1	112911957	112929543	131	-0.0639495	0.751851	0.815801	0.0278016	hypo	9
chr3	150378472	150396696	132	-0.0489141	0.855571	0.904485	0.0214414	hypo	9
chr12	93376066	93391676	125	-0.0556852	0.795592	0.851277	0.0231206	hypo	9
chr4	183610340	183624376	134	-0.0438179	0.836459	0.880277	0.0195167	hypo	9
chr5	94585645	94606741	110	-0.0643933	0.778044	0.842438	0.0236637	hypo	9
chr8	61687714	61704713	125	-0.0523555	0.805382	0.857738	0.0217581	hypo	9
chr11	28936434	28962947	124	-0.0597919	0.768074	0.827866	0.0246645	hypo	9
chr15	74489689	74500734	126	-0.0509967	0.770263	0.821259	0.0213826	hypo	9
chr13	104803015	104827701	137	-0.0431427	0.796342	0.839484	0.0196768	hypo	9
chr15	39321090	39349866	125	-0.0513009	0.811339	0.86264	0.0213518	hypo	9
chr12	55366709	55381047	113	-0.0623424	0.634637	0.69698	0.0235221	hypo	9
chr4	128703542	128715260	115	-0.0922157	0.510945	0.603161	0.0364689	hypo	9
chr10	18414036	18428514	117	-0.0667096	0.731916	0.798625	0.0260294	hypo	9
chr3	193693488	193704128	129	-0.0497797	0.813413	0.863193	0.0214414	hypo	9
chr12	6996061	7006833	128	-0.136122	0.704826	0.840948	0.057994	hypo	9
chr2	99345475	99356814	112	-0.117087	0.548597	0.665685	0.043563	hypo	9
chr10	92919232	92929869	108	-0.127366	0.545553	0.672919	0.0463486	hypo	9
chr2	60578117	60588676	114	-0.0569904	0.560741	0.617731	0.0217922	hypo	9
chr6	21204841	21218737	127	-0.053029	0.842468	0.895497	0.0225288	hypo	9
chr10	73026210	73037178	137	-0.0471054	0.810525	0.857631	0.0216161	hypo	9
chr5	71002662	71018609	122	-0.0666038	0.642393	0.708997	0.0271893	hypo	9
chr6	150946052	150956456	104	-0.0678063	0.516261	0.584068	0.0236636	hypo	9
chr7	7446751	7466105	131	-0.0500055	0.833701	0.883707	0.0219556	hypo	9
chr11	93581497	93598147	103	-0.0785904	0.700408	0.778999	0.0271061	hypo	9
chr13	47140897	47156887	134	-0.0582502	0.737776	0.796026	0.0261134	hypo	9
chr1	66750952	66776397	136	-0.0535407	0.791822	0.845363	0.0244334	hypo	9
chr3	65636062	65654681	132	-0.0483655	0.813385	0.86175	0.0214414	hypo	9
chr21	16679670	16699508	133	-0.0471583	0.872709	0.919868	0.0210946	hypo	9
chr17	26111339	26121386	125	-0.0649281	0.664574	0.729502	0.0273201	hypo	9
chr2	152792539	152809529	127	-0.0492343	0.833399	0.882633	0.0210406	hypo	9
chr6	32218988	32243926	126	-0.057284	0.724061	0.781345	0.02428	hypo	9
chr6	27345711	27360506	117	-0.104213	0.532769	0.636982	0.0411622	hypo	9
chr8	127509584	127527486	135	-0.0478305	0.816698	0.864529	0.0217581	hypo	9
chr4	114269425	114285320	124	-0.0533302	0.819973	0.873303	0.0222627	hypo	9
chr6	943586	958516	110	-0.063747	0.74707	0.810817	0.0235926	hypo	9
chr14	106798966	106825766	126	-0.0583062	0.63155	0.689856	0.0247697	hypo	9
chr12	110804176	110814230	129	-0.0522283	0.837092	0.88932	0.0227522	hypo	9
chr4	77183320	77201650	136	-0.0425355	0.818699	0.861234	0.0195563	hypo	9
chr1	209394747	209416098	114	-0.0639827	0.73341	0.797393	0.024679	hypo	9
chr5	42418236	42434023	106	-0.101773	0.482547	0.58432	0.036431	hypo	9
chr4	24044231	24061958	134	-0.0430236	0.830578	0.873601	0.0195167	hypo	9
chr16	6417161	6431485	129	-0.0594928	0.772594	0.832086	0.0260109	hypo	9
chr19	14488324	14499828	106	-0.118358	0.597217	0.715575	0.0427176	hypo	9
chr15	94075559	94096013	133	-0.0476204	0.807623	0.855243	0.0214815	hypo	9
chr2	17637139	17673472	135	-0.046009	0.822333	0.868342	0.0210617	hypo	8
chr2	207032873	207052859	137	-0.0483889	0.855548	0.903937	0.0224904	hypo	9
chr14	63064389	63090590	139	-0.045975	0.791542	0.837517	0.0217046	hypo	9
chr7	145270927	145292288	137	-0.0473217	0.771969	0.819291	0.0220242	hypo	9
chr3	182996991	183011141	126	-0.0500623	0.849847	0.899909	0.0214414	hypo	9
chr6	109403133	109415758	105	-0.109206	0.524752	0.633959	0.0391712	hypo	9
chr5	140375435	140387109	97	-0.0711022	0.650656	0.721758	0.023621	hypo	9
chr3	142293641	142304215	107	-0.11892	0.604205	0.723125	0.0431621	hypo	9
chr15	43463970	43483056	119	-0.0723282	0.710242	0.782571	0.0293467	hypo	9
chr13	33768914	33780307	127	-0.052223	0.787564	0.839787	0.0225947	hypo	9
chr3	122820261	122831349	121	-0.0520426	0.723225	0.775268	0.0214414	hypo	9
chr1	50569329	50585716	133	-0.0528211	0.69443	0.747251	0.0239249	hypo	9
chr5	105691094	105721474	127	-0.049912	0.820255	0.870167	0.0216101	hypo	8
chr4	112898742	112924262	137	-0.0417855	0.826403	0.868189	0.0195167	hypo	9
chr1	115625442	115637453	108	-0.0641568	0.659037	0.723194	0.0236261	hypo	9
chr7	105511709	105523251	127	-0.107653	0.58663	0.694282	0.0464513	hypo	9
chr13	21118625	21130286	124	-0.0572939	0.843972	0.901266	0.0243443	hypo	9
chr8	103746432	103757657	125	-0.059539	0.781046	0.840585	0.0253894	hypo	9
chr2	24538490	24553034	108	-0.0627919	0.764416	0.827208	0.0231183	hypo	9
chr6	142616487	142630697	124	-0.0832832	0.659211	0.742494	0.035269	hypo	9
chr2	35825196	35848808	130	-0.0473147	0.738748	0.786062	0.0210406	hypo	9
chr14	22568665	22585678	137	-0.048628	0.729029	0.777657	0.0228085	hypo	9
chr5	31226470	31241273	118	-0.0540689	0.798659	0.852728	0.0218707	hypo	9
chr13	45235627	45249712	126	-0.045613	0.832343	0.877956	0.0196899	hypo	9
chr1	160748683	160765805	128	-0.0539545	0.691692	0.745647	0.0236686	hypo	9
chr1	48437850	48450181	122	-0.0708031	0.67588	0.746683	0.0297763	hypo	9
chr7	93509909	93523787	113	-0.0624948	0.667486	0.729981	0.0241888	hypo	9
chr21	39850424	39862604	131	-0.0521541	0.48352	0.535674	0.0234566	hypo	9
chr20	17913901	17924251	117	-0.0584189	0.797951	0.85637	0.0234676	hypo	9
chr18	45714606	45728217	135	-0.043216	0.775992	0.819208	0.0200453	hypo	9
chr8	75709971	75737735	135	-0.0468852	0.82378	0.870665	0.0217581	hypo	9
chr13	68954457	68978934	123	-0.0464646	0.807811	0.854276	0.0196768	hypo	9
chr9	13719608	13741974	131	-0.0514338	0.781956	0.83339	0.0232036	hypo	9
chr15	95120734	95134097	125	-0.0496045	0.599932	0.649536	0.0213518	hypo	9
chr7	69061376	69079140	121	-0.103451	0.525647	0.629098	0.0426636	hypo	9
chr4	37443066	37454023	111	-0.0887698	0.695185	0.783955	0.0346038	hypo	9
chr11	22848856	22861219	112	-0.063999	0.667414	0.731413	0.0247282	hypo	9
chr12	90323065	90346855	118	-0.0559146	0.786711	0.842626	0.0227522	hypo	9
chr10	65560955	65586070	125	-0.0501155	0.774618	0.824734	0.0216162	hypo	9
chr12	12722424	12735508	118	-0.0579122	0.80862	0.866532	0.0236187	hypo	9
chr18	1240929	1264651	123	-0.047172	0.769839	0.817011	0.0200453	hypo	9
chr11	14255600	14269058	117	-0.0611233	0.752842	0.813965	0.0247167	hypo	9
chr11	16938449	16948712	121	-0.0935967	0.653915	0.747512	0.0395314	hypo	9
chr5	35617856	35631935	130	-0.0491008	0.725069	0.77417	0.0220915	hypo	9
chr2	65802141	65813004	119	-0.0511018	0.801864	0.852966	0.0210406	hypo	9
chr7	78623123	78651544	131	-0.0484243	0.798791	0.847216	0.0219556	hypo	9
chr6	33680358	33690701	123	-0.0534485	0.736952	0.790401	0.0227765	hypo	9
chr20	42012986	42023975	128	-0.0515918	0.746293	0.797885	0.0228671	hypo	9
chr4	110881941	110901573	119	-0.0473567	0.810432	0.857788	0.0195167	hypo	9
chr5	92447581	92472960	126	-0.0495013	0.790349	0.83985	0.0216101	hypo	9
chr5	74806249	74819948	132	-0.0610308	0.475014	0.536045	0.0279182	hypo	9
chr6	13555622	13568235	95	-0.0695577	0.787121	0.856679	0.022921	hypo	9
chr15	43536324	43547845	106	-0.0580842	0.765517	0.823601	0.0213518	hypo	9
chr2	46788252	46801403	113	-0.0542885	0.710611	0.764899	0.0212811	hypo	9
chr1	159156469	159168171	128	-0.0540691	0.715321	0.76939	0.0240217	hypo	9
chr2	142479255	142500804	130	-0.0465941	0.802352	0.848947	0.0210406	hypo	9
chr4	55667028	55701421	119	-0.0493676	0.767952	0.81732	0.0204258	hypo	8
chr11	45500862	45514637	123	-0.0576077	0.77755	0.835158	0.0246326	hypo	9
chr18	60948541	60963465	133	-0.0434446	0.802386	0.845831	0.0200979	hypo	9
chr13	38934880	38955004	94	-0.063155	0.679418	0.742573	0.0208128	hypo	9
chr7	130114957	130126800	113	-0.0601552	0.586459	0.646614	0.0236954	hypo	9
chr2	197098921	197114170	125	-0.0483663	0.731161	0.779527	0.0210406	hypo	9
chr1	63521198	63536456	115	-0.0599777	0.776613	0.836591	0.0240227	hypo	9
chr14	81930727	81940726	129	-0.0560262	0.723337	0.779363	0.0250527	hypo	9
[truncated: 1,554 more rows]
