# Supplementary material for: Large-scale hypomethylated blocks associated with Epstein-Barr virus–induced B-cell immortalization
Source: HighWire-hosted journal article supplement (doi:10.1101/gr.157743.113), 2013-09-25
Supplement: Supplemental_Data2_smallDMRs.xlsx [file Supplemental_Data2_smallDMRs.xlsx]

## Sheet: Transformation
chr	start	end	n	meanDiff	group1.mean	group2.mean	tstat.sd	direction	fwer
chr3	98254504	98254836	5	-0.736686	0.0583021	0.794988	0.0690064	hypo	0
chr11	114483028	114483485	12	-0.710949	0.176776	0.887724	0.0540655	hypo	0
chr12	9882243	9882840	6	-0.643837	0.0508597	0.694697	0.0647218	hypo	0
chr1	3590655	3590938	3	-0.623434	0.156936	0.78037	0.0911711	hypo	0
chr4	90760483	90760841	4	-0.621957	0.280572	0.902529	0.0537088	hypo	0
chr17	66454603	66455463	11	-0.617329	0.191849	0.809178	0.0679911	hypo	0
chr10	52269954	52270666	5	-0.612244	0.22794	0.840184	0.0532556	hypo	0
chr18	67613766	67614438	7	-0.610254	0.199011	0.809265	0.0674214	hypo	0
chr3	12689261	12689779	4	-0.603336	0.249027	0.852364	0.0557626	hypo	0
chr18	67612500	67613334	9	-0.600709	0.283385	0.884094	0.0674214	hypo	0
chr4	154410919	154411487	10	-0.599615	0.0965283	0.696143	0.0588984	hypo	0
chr12	9883266	9883446	3	-0.593145	0.0213296	0.614475	0.0639055	hypo	0
chr3	98273390	98274531	14	-0.592969	0.158745	0.751714	0.053362	hypo	0
chr22	19702992	19703254	3	-0.59269	0.0961355	0.688825	0.0833001	hypo	0
chr6	169956967	169957543	13	-0.586167	0.204779	0.790947	0.0611511	hypo	0
chr6	220908	222267	28	-0.584363	0.208684	0.793047	0.060003	hypo	0
chr3	194928561	194929283	13	-0.575061	0.138556	0.713617	0.0885649	hypo	0
chr7	32470154	32470665	4	-0.569101	0.295794	0.864895	0.0591725	hypo	0
chr5	110846605	110846692	3	-0.56551	0.254338	0.819848	0.0549404	hypo	0
chr8	42012199	42012711	10	-0.5645	0.239949	0.804449	0.0795865	hypo	0
chr15	52671009	52672238	20	-0.559646	0.191639	0.751284	0.0686085	hypo	0
chr6	33384179	33384897	11	-0.558239	0.131158	0.689397	0.0552453	hypo	0
chr11	315053	315262	5	-0.557095	0.119507	0.676602	0.0891405	hypo	0
chr4	154411825	154412746	20	-0.553533	0.236806	0.790338	0.0596061	hypo	0
chr4	190787172	190787708	6	-0.551013	0.330772	0.881785	0.0540757	hypo	0
chr6	229118	229974	18	-0.551002	0.317028	0.86803	0.0649704	hypo	0
chr7	54615347	54615530	3	-0.549922	0.151932	0.701854	0.0542398	hypo	0
chr6	27781643	27781921	7	-0.549519	0.0240951	0.573614	0.0589206	hypo	0
chr9	85660803	85662041	9	-0.549411	0.316853	0.866263	0.0553544	hypo	0
chr4	48197938	48199140	17	-0.5461	0.195764	0.741863	0.0601234	hypo	0
chr19	2597551	2597981	6	-0.545794	0.301257	0.84705	0.0602159	hypo	0
chr2	8746311	8747062	14	-0.545278	0.345731	0.891009	0.0641798	hypo	0
chr14	96128076	96128707	15	-0.545072	0.216787	0.761859	0.0754438	hypo	0
chr14	65768520	65769844	17	-0.542881	0.208854	0.751735	0.0580461	hypo	0
chr20	62732517	62732577	3	-0.540223	0.290492	0.830715	0.0718989	hypo	0
chr9	139660295	139660797	12	-0.537162	0.203297	0.740459	0.0680942	hypo	0
chr8	101319442	101320106	8	-0.536217	0.0656128	0.60183	0.0559824	hypo	0
chr1	79088240	79088769	6	-0.535439	0.258704	0.794143	0.0655392	hypo	0
chr18	73510281	73510569	4	-0.535381	0.329285	0.864666	0.0541693	hypo	0
chr11	45201036	45201141	3	-0.535256	0.382569	0.917825	0.0620326	hypo	0
chr20	48285097	48285543	13	-0.533775	0.195922	0.729698	0.0548131	hypo	0
chr1	204939634	204939815	4	-0.532479	0.339125	0.871605	0.0578958	hypo	0
chr9	114747759	114749162	19	-0.530272	0.191851	0.722123	0.0577037	hypo	0
chr15	80302955	80303973	15	-0.530109	0.225248	0.755357	0.0695938	hypo	0
chr10	11650023	11651524	21	-0.530077	0.0818006	0.611878	0.0569737	hypo	0
chr1	54939271	54939573	3	-0.529598	0.337186	0.866784	0.0581618	hypo	0
chr8	135575380	135576594	17	-0.529108	0.179545	0.708654	0.0651367	hypo	0
chr2	238362948	238363414	5	-0.528226	0.309505	0.837731	0.0574054	hypo	0
chr8	103541708	103542249	10	-0.528081	0.209271	0.737352	0.0789347	hypo	0
chr5	138610687	138612375	23	-0.527848	0.137264	0.665112	0.0532689	hypo	0
chr9	5451900	5452636	12	-0.527743	0.220225	0.747968	0.0601971	hypo	0
chr8	126648720	126650226	21	-0.527726	0.175935	0.703661	0.056507	hypo	0
chr22	47396635	47397684	17	-0.526936	0.218779	0.745715	0.0742663	hypo	0
chr7	99962708	99964802	33	-0.525586	0.232875	0.758461	0.0545321	hypo	0
chr17	2141682	2143872	28	-0.524477	0.202761	0.727239	0.0605768	hypo	0
chr15	80301885	80302593	9	-0.524459	0.258493	0.782953	0.0678168	hypo	0
chr3	176965334	176965481	9	-0.524194	0.24623	0.770424	0.0851218	hypo	0
chr9	114660698	114661197	3	-0.522928	0.173229	0.696157	0.0657942	hypo	0
chr6	106614043	106614677	6	-0.522539	0.344437	0.866976	0.0687511	hypo	0
chr1	116917856	116919606	18	-0.52178	0.197784	0.719564	0.0608315	hypo	0
chr8	135577157	135577695	16	-0.521764	0.207708	0.729471	0.0655364	hypo	0
chr2	172014419	172015105	10	-0.521435	0.198405	0.71984	0.0553916	hypo	0
chr20	3658336	3659145	13	-0.521153	0.304163	0.825316	0.0635951	hypo	0
chr7	77046215	77046751	10	-0.521032	0.188543	0.709575	0.0570458	hypo	0
chr20	24681557	24682211	8	-0.520653	0.351151	0.871803	0.0550667	hypo	0
chr2	53586952	53587449	3	-0.520245	0.236893	0.757138	0.0553402	hypo	0
chr4	106069919	106070261	6	-0.520169	0.184451	0.70462	0.0563664	hypo	0
chr13	49104830	49106105	19	-0.519043	0.250734	0.769778	0.059746	hypo	0
chr17	80360668	80361229	8	-0.518905	0.374873	0.893778	0.0729663	hypo	0
chr9	14692041	14692238	3	-0.518476	0.275274	0.79375	0.0743294	hypo	0
chr10	43893578	43894083	11	-0.518257	0.24351	0.761767	0.0764216	hypo	0
chr4	190786449	190786629	3	-0.517753	0.359288	0.877042	0.0540788	hypo	0
chr16	29743266	29743862	12	-0.517689	0.203042	0.720731	0.0552793	hypo	0
chr1	53649069	53649255	3	-0.51701	0.27321	0.79022	0.0601158	hypo	0
chr7	75779908	75779973	5	-0.516988	0.334263	0.851251	0.0662287	hypo	0
chr18	75679327	75679444	4	-0.516899	0.266735	0.783634	0.0581585	hypo	0
chr1	79089186	79089459	3	-0.51689	0.321905	0.838795	0.0655392	hypo	0
chr12	108934399	108935609	22	-0.516177	0.246632	0.762809	0.0568241	hypo	0
chr10	52176355	52177329	11	-0.516106	0.304305	0.820411	0.0551891	hypo	0
chr12	125400159	125401154	9	-0.515677	0.213877	0.729554	0.0574502	hypo	0
chr10	130002988	130003188	3	-0.514628	0.330453	0.84508	0.0543079	hypo	0
chr19	39050264	39050832	7	-0.514278	0.10976	0.624038	0.0756141	hypo	0
chr16	12632861	12633809	10	-0.51198	0.340346	0.852326	0.0635309	hypo	0
chr22	37558241	37560379	28	-0.511919	0.11255	0.624469	0.0620846	hypo	0
chr6	44615594	44616315	6	-0.5118	0.362812	0.874612	0.0531493	hypo	0
chr5	171922081	171922661	9	-0.511771	0.384929	0.8967	0.0573673	hypo	0
chr10	81003880	81004348	11	-0.511608	0.117618	0.629226	0.0740426	hypo	0
chr17	4299309	4299540	5	-0.51018	0.15223	0.66241	0.0813928	hypo	0
chr22	31889546	31890717	25	-0.509167	0.216914	0.726081	0.0651887	hypo	0
chr1	247187841	247188226	5	-0.508913	0.392966	0.901878	0.0571819	hypo	0
chr13	22273904	22274339	7	-0.508829	0.323788	0.832617	0.0527268	hypo	0
chr5	24455361	24455462	3	-0.50855	0.34048	0.849031	0.0531596	hypo	0
chr11	61507977	61508451	11	-0.507414	0.429441	0.936855	0.0583	hypo	0
chr10	52271425	52272624	9	-0.505744	0.333953	0.839697	0.0532556	hypo	0
chr20	58162423	58163012	7	-0.505452	0.349825	0.855277	0.0572488	hypo	0
chr20	49619776	49619949	3	-0.503902	0.309168	0.81307	0.0556088	hypo	0
chr10	112258886	112261195	36	-0.503136	0.261697	0.764833	0.066639	hypo	0
chr10	35417163	35417434	7	-0.503127	0.154892	0.658019	0.059918	hypo	0
chr1	3573509	3573569	4	-0.502927	0.149498	0.652425	0.0832119	hypo	0
chr9	3523885	3524269	3	-0.502723	0.0867697	0.589493	0.0532734	hypo	0
chr13	113422346	113422635	11	-0.502314	0.317171	0.819484	0.0757343	hypo	0
chr4	48197243	48197555	4	-0.501954	0.226672	0.728626	0.0605725	hypo	0
chr17	27051766	27052478	16	-0.501165	0.188905	0.69007	0.0608112	hypo	0
chr1	25357005	25357289	4	-0.500896	0.302773	0.803669	0.0636558	hypo	0
chr21	44582323	44582528	8	-0.498766	0.248784	0.74755	0.077823	hypo	0
chr16	58552053	58552883	9	-0.498333	0.297574	0.795907	0.0608418	hypo	0
chr7	101633272	101633518	5	-0.497999	0.312951	0.81095	0.0732905	hypo	0
chr19	19280139	19280424	3	-0.497763	0.296287	0.794051	0.0882927	hypo	0
chr4	48199916	48200086	3	-0.497482	0.361048	0.85853	0.0592483	hypo	0
chr8	142193405	142193461	5	-0.4973	0.200674	0.697975	0.0833058	hypo	0
chr1	76254925	76255065	3	-0.496985	0.2269	0.723885	0.0560318	hypo	0
chr3	171000384	171001642	13	-0.496785	0.258622	0.755407	0.0550391	hypo	0
chr6	73333620	73333937	5	-0.495983	0.106448	0.602431	0.0620653	hypo	0
chr6	167506851	167507410	20	-0.495207	0.0937566	0.588964	0.0607955	hypo	0
chr10	98751960	98752404	5	-0.495075	0.408782	0.903857	0.0642393	hypo	0
chr15	74655294	74655830	7	-0.494992	0.431583	0.926575	0.0581011	hypo	0
chr1	225814020	225814659	5	-0.494885	0.399654	0.894539	0.0532715	hypo	0
chr14	22933644	22933961	4	-0.493839	0.359108	0.852947	0.0562186	hypo	0
chr16	2013473	2013630	7	-0.493618	0.215384	0.709002	0.0806353	hypo	0
chr1	79087585	79087918	3	-0.493555	0.234868	0.728423	0.0655392	hypo	0
chr11	348519	348590	4	-0.493321	0.294311	0.787632	0.0855149	hypo	0
chr16	71851857	71852608	17	-0.492719	0.12486	0.617579	0.072411	hypo	0
chr12	105725849	105726019	4	-0.492335	0.243689	0.736023	0.0622058	hypo	0
chr6	73398945	73399952	14	-0.491796	0.347527	0.839323	0.0523465	hypo	0
chr12	49762879	49763288	11	-0.49178	0.212997	0.704776	0.0557888	hypo	0
chr10	134139904	134140240	11	-0.490272	0.223218	0.71349	0.0567688	hypo	0
chr17	33359273	33359723	5	-0.4902	0.333105	0.823305	0.0773899	hypo	0
chr8	132050454	132050549	3	-0.490154	0.314359	0.804513	0.058319	hypo	0
chr6	27859476	27859991	18	-0.490099	0.0803556	0.570454	0.0533318	hypo	0
chr1	235106948	235108116	17	-0.489449	0.361932	0.851382	0.0639445	hypo	0
chr12	123926156	123926997	19	-0.489325	0.362637	0.851962	0.0617475	hypo	0
chr12	66128297	66128799	4	-0.489159	0.350046	0.839206	0.0593712	hypo	0
chr7	100015391	100016286	15	-0.488659	0.42433	0.912989	0.0604236	hypo	0
chr19	6527780	6528101	7	-0.488559	0.109954	0.598513	0.0644908	hypo	0
chr12	130404795	130404966	5	-0.488434	0.305771	0.794205	0.0551814	hypo	0
chr2	242822635	242822887	8	-0.487854	0.326072	0.813926	0.0737972	hypo	0
chr12	50443728	50444002	3	-0.487719	0.342068	0.829788	0.0641215	hypo	0
chr2	65456162	65456209	4	-0.487666	0.152939	0.640606	0.0686045	hypo	0
chr16	71850787	71851342	11	-0.487627	0.0496946	0.537322	0.072411	hypo	0
chr12	2208936	2209409	6	-0.487257	0.356098	0.843355	0.0542729	hypo	0
chr19	31757855	31757948	4	-0.48673	0.403755	0.890485	0.0560883	hypo	0
chr9	137284063	137284217	3	-0.486627	0.202038	0.688665	0.06995	hypo	0
chr18	56339912	56340167	6	-0.485409	0.258714	0.744122	0.0560592	hypo	0
chr20	61883856	61884235	4	-0.485348	0.275396	0.760744	0.0594867	hypo	0
chr17	76016225	76016793	6	-0.48509	0.410514	0.895604	0.0624453	hypo	0
chr7	73280145	73280580	4	-0.484601	0.349794	0.834395	0.0543395	hypo	0
chr15	59701784	59703098	15	-0.484471	0.317111	0.801582	0.0629516	hypo	0
chr14	103245538	103246119	7	-0.484086	0.301652	0.785738	0.0638757	hypo	0
chr5	96293928	96295039	16	-0.483401	0.140436	0.623838	0.0611367	hypo	0
chr14	71990737	71991145	4	-0.483054	0.347068	0.830123	0.0556014	hypo	0
chr10	126713757	126714015	6	-0.482768	0.205345	0.688114	0.0617	hypo	0
chr15	65924083	65924457	9	-0.482581	0.290006	0.772587	0.0550916	hypo	0
chr22	37615187	37616079	15	-0.482492	0.100863	0.583354	0.0772936	hypo	0
chr20	47896080	47898029	26	-0.482389	0.127328	0.609717	0.0707605	hypo	0
chr21	40504086	40504446	4	-0.481508	0.386857	0.868365	0.0596058	hypo	0
chr7	27220111	27220406	3	-0.481432	0.418557	0.899989	0.0813679	hypo	0
chr12	57577459	57577659	8	-0.48135	0.410054	0.891405	0.0645834	hypo	0
chr2	172176270	172177062	9	-0.48121	0.0959848	0.577195	0.0588633	hypo	0
chr10	71079559	71079911	8	-0.480209	0.240218	0.720427	0.0633056	hypo	0
chr5	150218653	150218806	3	-0.480085	0.364577	0.844662	0.0539698	hypo	0
chr1	11045114	11045898	13	-0.479979	0.281074	0.761054	0.0694876	hypo	0
chr17	38016436	38016897	5	-0.479429	0.236475	0.715904	0.0546891	hypo	0
chr19	49379502	49379526	3	-0.479189	0.214204	0.693393	0.0719719	hypo	0
chr2	43651420	43652423	8	-0.479174	0.203605	0.682779	0.0524837	hypo	0
chr3	14601243	14602383	10	-0.478761	0.296808	0.775569	0.056368	hypo	0
chr21	37913811	37914423	7	-0.477894	0.386602	0.864496	0.057104	hypo	0
chr10	112261562	112262095	6	-0.47726	0.206054	0.683314	0.0665405	hypo	0
chr1	22107788	22108181	20	-0.477166	0.244519	0.721685	0.0653045	hypo	0
chr2	97662061	97662731	8	-0.477146	0.458828	0.935974	0.0529131	hypo	0
chr20	32250620	32250879	7	-0.476739	0.374578	0.851317	0.0566523	hypo	0
chr1	167035083	167035339	4	-0.47671	0.312627	0.789337	0.0559308	hypo	0
chr1	47653879	47654140	3	-0.476499	0.352793	0.829293	0.0614237	hypo	0
chr7	102072752	102073158	8	-0.476311	0.0734688	0.549779	0.0635636	hypo	0
chr5	122302836	122304028	23	-0.476122	0.313248	0.78937	0.0568527	hypo	0
chr3	121749587	121750006	4	-0.476075	0.405592	0.881667	0.0532879	hypo	0
chr6	16413998	16414522	7	-0.475984	0.277377	0.753361	0.0748688	hypo	0
chr22	21028654	21029039	4	-0.475893	0.381521	0.857414	0.0740231	hypo	0
chr1	3156097	3156250	3	-0.475851	0.34016	0.816011	0.0640994	hypo	0
chr2	128458069	128458401	12	-0.475687	0.193959	0.669646	0.0659508	hypo	0
chr17	40544930	40545663	10	-0.475139	0.270445	0.745584	0.0648619	hypo	0
chr2	97661232	97661759	7	-0.474602	0.45978	0.934382	0.0554389	hypo	0
chr6	27783986	27784091	9	-0.474583	0.373701	0.848284	0.0756231	hypo	0
chr17	20734698	20735500	7	-0.47449	0.432	0.90649	0.0635733	hypo	0
chr2	19980633	19980920	3	-0.474466	0.360075	0.834542	0.0532928	hypo	0
chr11	61596959	61598048	15	-0.474449	0.293317	0.767766	0.0625004	hypo	0
chr1	28835351	28837350	27	-0.474098	0.170998	0.645096	0.0680832	hypo	0
chr10	89824632	89824691	3	-0.474029	0.226378	0.700407	0.0586828	hypo	0
chr2	494264	494600	5	-0.47378	0.463297	0.937077	0.0563356	hypo	0
chr6	26030392	26031537	10	-0.473738	0.320581	0.794319	0.0567105	hypo	0
chr15	52042540	52043103	7	-0.473637	0.17308	0.646716	0.0621347	hypo	0
chr15	64539036	64539250	5	-0.473317	0.372207	0.845524	0.0527941	hypo	0
chr7	102790383	102790427	3	-0.47322	0.424253	0.897474	0.0807757	hypo	0
chr1	37941179	37942047	15	-0.473048	0.162369	0.635418	0.0746651	hypo	0
chr7	2335212	2336433	17	-0.473009	0.331826	0.804836	0.0629064	hypo	0
chr7	26007698	26008067	12	-0.472617	0.0829147	0.555532	0.0611159	hypo	0
chr22	47122752	47123032	13	-0.472479	0.30827	0.78075	0.0745942	hypo	0
chr7	117438374	117438660	3	-0.472478	0.37021	0.842688	0.058169	hypo	0
chr3	169975538	169975719	9	-0.472251	0.357641	0.829892	0.052045	hypo	0
chrX	7064491	7064961	5	-0.47221	0.272175	0.744385	0.0744379	hypo	0
chr1	54841846	54842464	10	-0.472152	0.289606	0.761758	0.0619864	hypo	0
chr10	89824151	89824246	3	-0.471803	0.239976	0.711779	0.0586828	hypo	0
chr14	64191856	64193118	18	-0.471728	0.283326	0.755054	0.0626607	hypo	0
chr14	65770155	65771234	16	-0.471446	0.181383	0.652829	0.0583839	hypo	0
chr6	56973984	56974265	3	-0.471365	0.326964	0.798329	0.0544688	hypo	0
chr3	196166717	196168685	23	-0.471184	0.235259	0.706444	0.0531185	hypo	0
chr6	30684039	30684478	15	-0.470596	0.230214	0.70081	0.0619073	hypo	0
chr22	27070119	27070304	5	-0.470361	0.09675	0.567111	0.0614102	hypo	0
chr18	77116603	77116778	5	-0.470037	0.290749	0.760786	0.0761639	hypo	0
chr9	129402980	129403189	5	-0.470002	0.369478	0.83948	0.0583105	hypo	0
chr1	65429366	65430118	6	-0.469671	0.155153	0.624823	0.0551921	hypo	0
chr15	101460947	101461412	6	-0.46949	0.276786	0.746276	0.0601647	hypo	0
chr1	8532839	8534565	11	-0.469473	0.285933	0.755406	0.0545993	hypo	0
chr14	96129371	96129824	9	-0.469437	0.0732506	0.542687	0.0740765	hypo	0
chr22	42015489	42015905	6	-0.469092	0.218051	0.687144	0.0576495	hypo	0
chr14	68649293	68649516	5	-0.468929	0.334823	0.803752	0.0518732	hypo	0
chr15	88794602	88794830	3	-0.468919	0.365111	0.83403	0.0569134	hypo	0
chr9	6682371	6683062	21	-0.46839	0.173979	0.642369	0.0648044	hypo	0
chr20	47664199	47664310	7	-0.468378	0.197452	0.66583	0.0606788	hypo	0
chr2	43629759	43630006	3	-0.467851	0.318359	0.786209	0.057881	hypo	0
chr11	7533371	7533538	4	-0.467671	0.140383	0.608055	0.0568352	hypo	0
chr10	134866871	134867210	9	-0.467617	0.410878	0.878495	0.0652953	hypo	0
chr6	389612	390547	17	-0.467552	0.098711	0.566263	0.0563728	hypo	0
chr11	117868687	117869026	7	-0.4671	0.376633	0.843733	0.0707159	hypo	0
chr1	111041309	111041667	4	-0.466661	0.404986	0.871648	0.0533617	hypo	0
chr12	6208435	6208930	6	-0.466174	0.394592	0.860766	0.0582121	hypo	0
chr9	129417806	129418278	8	-0.466167	0.391766	0.857933	0.0591946	hypo	0
chr16	58553203	58553531	3	-0.465906	0.316218	0.782124	0.0608418	hypo	0
chr12	40619603	40619727	4	-0.465902	0.0621143	0.528016	0.0670056	hypo	0
chr19	43016748	43017897	20	-0.465835	0.400828	0.866663	0.0560637	hypo	0
chr8	1903789	1904229	6	-0.465652	0.377582	0.843234	0.0596244	hypo	0
chr12	58291403	58291577	3	-0.46564	0.312448	0.778088	0.0691618	hypo	0
chr6	106615255	106615506	6	-0.465459	0.386783	0.852242	0.0681447	hypo	0
chr17	37735078	37735504	3	-0.464502	0.447903	0.912405	0.0628033	hypo	0
chr12	54583403	54583569	3	-0.464423	0.304972	0.769395	0.0674844	hypo	0
chr7	43907879	43907977	4	-0.464391	0.312225	0.776616	0.0582722	hypo	0
chr1	224369598	224369994	8	-0.464079	0.28333	0.747409	0.0595679	hypo	0
chr12	11933476	11934851	16	-0.463997	0.244587	0.708584	0.0600873	hypo	0
chr8	140725768	140725985	4	-0.463746	0.400215	0.863962	0.0573259	hypo	0
chr18	9061549	9061779	5	-0.463655	0.292406	0.756061	0.0728639	hypo	0
chr1	79089779	79090199	8	-0.463623	0.39613	0.859752	0.0655392	hypo	0
chr2	191883289	191883686	4	-0.463618	0.523739	0.987357	0.0588689	hypo	0
chr10	50742776	50743087	9	-0.463577	0.237245	0.700822	0.0608449	hypo	0
chr1	111042094	111042603	6	-0.463241	0.418235	0.881477	0.0533695	hypo	0
chr17	42696155	42696478	11	-0.463193	0.413196	0.876389	0.0626516	hypo	0
chr8	29381060	29381775	10	-0.46307	0.333972	0.797042	0.0599185	hypo	0
chr21	37661152	37662173	12	-0.46287	0.33229	0.79516	0.0614836	hypo	0
chr10	89825036	89825247	3	-0.462805	0.223243	0.686049	0.0586828	hypo	0
chr4	105411270	105411438	3	-0.462648	0.0777536	0.540402	0.0614667	hypo	0
chr10	52268183	52268502	5	-0.461975	0.398015	0.85999	0.0532556	hypo	0
chr1	207670368	207671615	18	-0.461024	0.163901	0.624925	0.0604482	hypo	0
chr5	74808536	74808973	15	-0.460899	0.384941	0.84584	0.0617529	hypo	0
chr22	31884312	31884762	7	-0.460866	0.27625	0.737116	0.0629361	hypo	0
chr13	42847561	42849330	19	-0.460697	0.317662	0.778359	0.0534633	hypo	0
chr15	59595833	59596567	18	-0.460607	0.410219	0.870827	0.0592105	hypo	0
chr3	42236981	42237460	7	-0.460553	0.352853	0.813406	0.0651961	hypo	0
chr1	206728940	206729685	16	-0.460367	0.33876	0.799127	0.0555725	hypo	0
chr2	242931296	242931455	5	-0.460345	0.295122	0.755467	0.0554989	hypo	0
chr2	191884348	191884496	3	-0.460112	0.493745	0.953858	0.0588689	hypo	0
chr1	206942346	206943235	19	-0.459878	0.300577	0.760455	0.0644915	hypo	0
chr1	6549700	6549784	3	-0.459582	0.430352	0.889934	0.0617916	hypo	0
chr2	85165333	85165791	4	-0.459582	0.186467	0.646049	0.0651179	hypo	0
chr8	6274825	6275946	15	-0.459567	0.293117	0.752684	0.065182	hypo	0
chr2	172288917	172289187	3	-0.458537	0.37561	0.834147	0.0547196	hypo	0
chr11	118566285	118567024	15	-0.458505	0.276314	0.734819	0.0624538	hypo	0
chr8	30583924	30584211	8	-0.458268	0.38642	0.844688	0.0677685	hypo	0
chr10	105451229	105451802	6	-0.45794	0.191224	0.649164	0.062606	hypo	0
chr5	156347132	156348562	13	-0.457451	0.414374	0.871825	0.0545369	hypo	0
chr14	24780904	24780931	3	-0.457408	0.221434	0.678841	0.0766626	hypo	0
chr15	59662722	59663431	9	-0.457039	0.186223	0.643263	0.0591495	hypo	0
chr8	128808194	128808962	14	-0.456585	0.249149	0.705734	0.0615395	hypo	0
chr9	71322755	71323031	3	-0.456244	0.0890067	0.545251	0.0538047	hypo	0
chr2	219758502	219758572	4	-0.455701	0.0690244	0.524726	0.0531697	hypo	0
chr8	49012122	49012312	3	-0.455695	0.410254	0.865949	0.0542616	hypo	0
chr2	8745837	8746002	7	-0.455539	0.4882	0.943739	0.0617929	hypo	0
chr19	2610384	2610631	6	-0.455482	0.0648647	0.520347	0.0675628	hypo	0
chr6	17704771	17705083	8	-0.455446	0.174103	0.629549	0.0803505	hypo	0
chr10	102107858	102108204	5	-0.455146	0.272665	0.727811	0.0580568	hypo	0
chr7	140292100	140292387	7	-0.454978	0.444482	0.89946	0.0533845	hypo	0
chr5	172479228	172479871	12	-0.45465	0.417073	0.871722	0.0607941	hypo	0
chr17	73294160	73294624	10	-0.454253	0.17987	0.634123	0.0681978	hypo	0
chr2	114038135	114038339	3	-0.453815	0.482083	0.935898	0.0538831	hypo	0
chr15	85526399	85526706	7	-0.45374	0.227666	0.681407	0.0574425	hypo	0
chr17	3700119	3700281	7	-0.453599	0.193796	0.647395	0.0615395	hypo	0
chr14	103073162	103074629	19	-0.453473	0.351369	0.804843	0.0600266	hypo	0
chr5	150219137	150219297	4	-0.453096	0.373611	0.826707	0.0539698	hypo	0
chr6	169956486	169956576	3	-0.452855	0.350959	0.803814	0.0578389	hypo	0
chr1	52605558	52605994	4	-0.452682	0.247744	0.700426	0.0592628	hypo	0
chr14	22934943	22935090	3	-0.45242	0.37997	0.83239	0.0565213	hypo	0
chr11	66312529	66312671	7	-0.452354	0.24853	0.700884	0.0717979	hypo	0
chr17	18825963	18826717	11	-0.451654	0.324237	0.775891	0.0588172	hypo	0
chr8	3049777	3050140	6	-0.451326	0.445075	0.896401	0.0548831	hypo	0
chr2	28830071	28830856	6	-0.451279	0.392919	0.844197	0.0527282	hypo	0
chr6	16420309	16421545	14	-0.45074	0.259143	0.709883	0.0573393	hypo	0
chr19	2607726	2607793	6	-0.45052	0.110336	0.560856	0.0663454	hypo	0
chr12	117810808	117811232	6	-0.450464	0.328574	0.779038	0.0520593	hypo	0
chr19	39895980	39896302	12	-0.45028	0.345057	0.795337	0.0741469	hypo	0
chr8	98643999	98644692	13	-0.449901	0.333746	0.783648	0.0577857	hypo	0
chr6	167371414	167371755	8	-0.449808	0.30663	0.756438	0.0631678	hypo	0
chr1	226272062	226272237	4	-0.449553	0.282172	0.731725	0.0678713	hypo	0
chr10	134140579	134140781	4	-0.449541	0.340398	0.789939	0.0567688	hypo	0
chr1	155828289	155828732	14	-0.449458	0.24434	0.693798	0.0632245	hypo	0
chr15	23075765	23075942	7	-0.449199	0.155262	0.60446	0.0590026	hypo	0
chr3	5231530	5231579	4	-0.44919	0.0865895	0.535779	0.0639233	hypo	0
chr1	180878044	180879030	10	-0.449143	0.351058	0.8002	0.0548005	hypo	0
chr15	67378047	67378203	4	-0.449128	0.146301	0.595428	0.0606774	hypo	0
chr10	132964159	132965782	24	-0.449122	0.399319	0.848441	0.0534356	hypo	0
chr8	101484997	101487092	20	-0.449005	0.2675	0.716506	0.0668714	hypo	0
chr16	88078445	88078480	4	-0.448716	0.264503	0.71322	0.0920199	hypo	0
chr2	8826512	8826734	4	-0.448652	0.31237	0.761022	0.0586696	hypo	0
chr9	126690279	126690926	7	-0.448601	0.0766491	0.52525	0.0646595	hypo	0
chr18	19209061	19209922	11	-0.448529	0.345259	0.793788	0.0556523	hypo	0
chr15	65184802	65185444	6	-0.448161	0.11107	0.559231	0.0574431	hypo	0
chr19	441853	442070	4	-0.447822	0.451216	0.899039	0.0593457	hypo	0
chr3	179042702	179043107	13	-0.447786	0.348879	0.796665	0.0581054	hypo	0
chr1	160709925	160712468	24	-0.447437	0.314096	0.761533	0.0588523	hypo	0
chr7	140292698	140293149	6	-0.447414	0.430716	0.87813	0.0533845	hypo	0
chr1	38392686	38392827	5	-0.447135	0.227187	0.674322	0.0691881	hypo	0
chr16	31119002	31119264	5	-0.447072	0.311078	0.75815	0.0625069	hypo	0
chr1	28572167	28572299	5	-0.446906	0.179395	0.626301	0.0597708	hypo	0
chr4	108639650	108640180	10	-0.446817	0.219405	0.666222	0.0539324	hypo	0
chr10	90642723	90643206	8	-0.446663	0.330717	0.777379	0.0600265	hypo	0
chr20	62183570	62183751	4	-0.446529	0.259258	0.705787	0.0775371	hypo	0
chr14	22958938	22959930	10	-0.446497	0.129844	0.576341	0.0569917	hypo	0
chr16	75252103	75252695	14	-0.446494	0.334429	0.780923	0.0605175	hypo	0
chr15	80669404	80669726	6	-0.446365	0.40854	0.854904	0.0555379	hypo	0
chr22	27070681	27070860	3	-0.446119	0.311681	0.757799	0.0611304	hypo	0
chr15	85279340	85280084	6	-0.446104	0.213613	0.659717	0.0576026	hypo	0
chr20	47356509	47357568	11	-0.446085	0.343144	0.789229	0.0693418	hypo	0
chr18	72229971	72230481	6	-0.446045	0.435403	0.881448	0.0533021	hypo	0
chr9	114747047	114747268	8	-0.445835	0.068882	0.514717	0.0576673	hypo	0
chr1	6226282	6226490	3	-0.445716	0.380974	0.82669	0.0535194	hypo	0
chr10	102134389	102134880	5	-0.4454	0.38328	0.828679	0.0553429	hypo	0
chr10	75844930	75845444	6	-0.445097	0.481787	0.926884	0.0594601	hypo	0
chr1	207127957	207128706	10	-0.444961	0.417064	0.862025	0.0681933	hypo	0
chr12	110721054	110721677	7	-0.44485	0.217752	0.662602	0.057461	hypo	0
chr2	237019516	237019649	7	-0.444819	0.468358	0.913177	0.0582376	hypo	0
chr3	194973036	194973224	3	-0.444643	0.430857	0.8755	0.056973	hypo	0
chr16	2302748	2303082	7	-0.444496	0.466323	0.910819	0.0680268	hypo	0
chr19	10339830	10340353	5	-0.444463	0.193246	0.63771	0.0635969	hypo	0
chr12	52420328	52420361	3	-0.444441	0.410557	0.854999	0.0645083	hypo	0
chr10	1038196	1038637	9	-0.444439	0.396087	0.840525	0.0598857	hypo	0
chr6	6684484	6685028	12	-0.444382	0.240942	0.685324	0.0589274	hypo	0
chr11	73470162	73470403	3	-0.444286	0.293749	0.738035	0.0570117	hypo	0
chr9	115816700	115816989	4	-0.444158	0.474517	0.918675	0.0563432	hypo	0
chr17	38023500	38023639	3	-0.444122	0.0314263	0.475549	0.058553	hypo	0
chr6	37086667	37086931	8	-0.444122	0.483754	0.927876	0.0576019	hypo	0
chr3	191048539	191049393	11	-0.443941	0.286256	0.730197	0.0617688	hypo	0
chr1	155982376	155982434	3	-0.443546	0.256548	0.700094	0.0589437	hypo	0
chr12	125347219	125347452	4	-0.443496	0.194628	0.638125	0.0681979	hypo	0
chr14	104521859	104521920	3	-0.443478	0.379708	0.823186	0.0525604	hypo	0
chr16	68791116	68791226	4	-0.44301	0.0632284	0.506238	0.0602614	hypo	0
chr15	75405011	75405037	3	-0.442939	0.34989	0.792829	0.0639909	hypo	0
chr19	50177057	50177393	4	-0.442913	0.433724	0.876637	0.0843804	hypo	0
chr3	150483563	150484093	9	-0.442818	0.270429	0.713247	0.0638688	hypo	0
chr16	23853037	23853223	8	-0.442614	0.234141	0.676756	0.0663671	hypo	0
chr5	5752391	5753409	11	-0.442243	0.334254	0.776497	0.0606428	hypo	0
chr1	110762692	110763349	5	-0.441421	0.489754	0.931175	0.0528707	hypo	0
chr3	156394117	156394546	3	-0.44135	0.343203	0.784553	0.0589786	hypo	0
chr10	134783887	134784559	12	-0.441261	0.390649	0.83191	0.0607711	hypo	0
chr1	32757109	32757215	4	-0.441249	0.138508	0.579756	0.0585462	hypo	0
chr3	10404677	10405061	6	-0.441178	0.39195	0.833128	0.054539	hypo	0
chr7	91877445	91877805	3	-0.441067	0.50034	0.941407	0.0549875	hypo	0
chr2	213881466	213881978	6	-0.440805	0.380641	0.821445	0.0586042	hypo	0
chr20	48285959	48286408	7	-0.440762	0.165443	0.606205	0.0548131	hypo	0
chr14	103287461	103289299	34	-0.440593	0.298214	0.738807	0.053222	hypo	0
chr2	25644494	25645019	5	-0.440381	0.150199	0.59058	0.0680595	hypo	0
chrX	24098435	24099026	6	-0.440073	0.282706	0.722778	0.0820884	hypo	0
chr20	45824266	45824520	8	-0.439953	0.343849	0.783802	0.0620534	hypo	0
chr17	76272454	76272768	5	-0.439483	0.178608	0.618091	0.071577	hypo	0
chr11	44588757	44588808	3	-0.439367	0.333586	0.772953	0.0781312	hypo	0
chr10	112634036	112634500	4	-0.439364	0.166479	0.605843	0.0557009	hypo	0
chr6	3764053	3764506	4	-0.439296	0.483572	0.922868	0.0633436	hypo	0
chr5	79286030	79286224	4	-0.438938	0.229358	0.668295	0.0602756	hypo	0
chr9	99182526	99182771	3	-0.43892	0.251048	0.689968	0.0605585	hypo	0
chr16	14702040	14702916	11	-0.438783	0.387469	0.826252	0.0647101	hypo	0
chr6	26122580	26122956	8	-0.43856	0.343106	0.781667	0.0552291	hypo	0
chr3	10404308	10404348	3	-0.438318	0.345376	0.783694	0.0545599	hypo	0
chr13	27856027	27856543	5	-0.43763	0.452955	0.890586	0.05451	hypo	0
chr6	293909	294140	4	-0.437443	0.159985	0.597428	0.0705622	hypo	0
chr6	31132637	31133459	16	-0.437417	0.344236	0.781653	0.0671903	hypo	0
chr1	183866793	183867307	10	-0.4374	0.279978	0.717378	0.0551587	hypo	0
chr16	89390582	89391090	10	-0.437258	0.423654	0.860912	0.065396	hypo	0
chr3	124859605	124859945	8	-0.43709	0.258182	0.695272	0.0579737	hypo	0
chr16	3673249	3673597	5	-0.436492	0.326472	0.762963	0.0729102	hypo	0
chr22	50973197	50973837	12	-0.436278	0.261765	0.698043	0.0742039	hypo	0
chr6	86389614	86389880	5	-0.435987	0.211475	0.647462	0.056056	hypo	0
chr1	45266974	45268100	17	-0.435739	0.356363	0.792102	0.0709265	hypo	0
chr14	104229456	104230673	11	-0.435648	0.400147	0.835795	0.0561029	hypo	0
chr18	23761007	23762330	13	-0.435537	0.415668	0.851206	0.0637107	hypo	0
chr19	46209609	46210749	22	-0.435512	0.0831027	0.518614	0.0627828	hypo	0
chr18	77282651	77282713	3	-0.435075	0.283152	0.718227	0.0753882	hypo	0
chr15	44040413	44040532	6	-0.435034	0.352034	0.787068	0.0716787	hypo	0
chr8	135584195	135584877	10	-0.434854	0.494085	0.928939	0.0624397	hypo	0
chr1	54938539	54938943	5	-0.434413	0.471055	0.905468	0.0581956	hypo	0
chr2	241524444	241524995	11	-0.434355	0.110724	0.545079	0.0587647	hypo	0
chr12	12511143	12511607	10	-0.434231	0.146514	0.580745	0.0544513	hypo	0
chr19	13010416	13011312	16	-0.433958	0.297539	0.731498	0.0641471	hypo	0
chr1	33593692	33594090	10	-0.433889	0.374977	0.808865	0.0599871	hypo	0
chr11	74700892	74701026	4	-0.433713	0.39503	0.828743	0.0671872	hypo	0
chr15	44119978	44120638	11	-0.433668	0.155475	0.589143	0.0616653	hypo	0
chr15	50669449	50669744	3	-0.433531	0.456595	0.890126	0.0541588	hypo	0
chr2	113915824	113916102	5	-0.433487	0.321671	0.755158	0.0616778	hypo	0
chr19	18280886	18281112	7	-0.433147	0.2492	0.682347	0.0772943	hypo	0
chr5	60242045	60242090	3	-0.432761	0.148427	0.581188	0.0656397	hypo	0
chr17	36624522	36624613	3	-0.432722	0.416382	0.849104	0.0605991	hypo	0
chr7	101854778	101855008	9	-0.432669	0.4127	0.845369	0.0692236	hypo	0
chr5	138775551	138775779	4	-0.432451	0.380946	0.813397	0.0629395	hypo	0
chr16	3847702	3848285	9	-0.432437	0.158899	0.591336	0.0550491	hypo	0
chr17	8149942	8150138	12	-0.432337	0.180969	0.613306	0.0581077	hypo	0
chr8	135583545	135583851	4	-0.43221	0.510514	0.942725	0.0629625	hypo	0
chr7	140098838	140098996	6	-0.432205	0.441979	0.874184	0.0612431	hypo	0
chr16	87807979	87808843	24	-0.432175	0.180018	0.612193	0.0682292	hypo	0
chr17	1625701	1625934	6	-0.431858	0.2778	0.709658	0.0626764	hypo	0
chr20	49984445	49984805	6	-0.431679	0.509543	0.941222	0.0579832	hypo	0
chr14	23476898	23476986	3	-0.431619	0.371245	0.802865	0.0620518	hypo	0
chr6	119217483	119217672	3	-0.431584	0.186332	0.617916	0.0589584	hypo	0
chr5	118690495	118691037	15	-0.431432	0.0784664	0.509898	0.0585551	hypo	0
chr18	60192825	60193103	9	-0.43123	0.121207	0.552437	0.0583227	hypo	0
chr6	153302551	153303144	7	-0.431188	0.0924759	0.523664	0.05503	hypo	0
chr3	15403851	15404367	15	-0.430991	0.195586	0.626577	0.0613026	hypo	0
chr3	56715650	56716071	3	-0.43097	0.344216	0.775185	0.0574208	hypo	0
chr17	33674047	33674073	3	-0.430913	0.437028	0.86794	0.0579716	hypo	0
chr2	135811029	135811148	3	-0.430686	0.373136	0.803822	0.0551473	hypo	0
chr10	24941005	24941785	7	-0.430576	0.35308	0.783656	0.0556323	hypo	0
chr10	98752891	98753033	3	-0.430552	0.479811	0.910364	0.0626694	hypo	0
chr1	235684206	235684515	4	-0.430295	0.443624	0.873918	0.053442	hypo	0
chr9	135991080	135991425	16	-0.430233	0.356579	0.786812	0.0754047	hypo	0
chr14	71965935	71966142	4	-0.430217	0.398489	0.828706	0.0560094	hypo	0
chr5	178979080	178979678	9	-0.430098	0.43004	0.860139	0.06314	hypo	0
chr12	6645287	6645837	7	-0.42996	0.233697	0.663657	0.0600694	hypo	0
chrX	13751461	13751727	4	-0.429945	0.252023	0.681968	0.0774708	hypo	0
chr6	149889031	149889497	8	-0.429749	0.148377	0.578126	0.059486	hypo	0
chr16	68554138	68554182	3	-0.429573	0.408559	0.838131	0.0587392	hypo	0
chr6	16431917	16432853	13	-0.429471	0.357231	0.786702	0.0540732	hypo	0
chr7	105923321	105923526	3	-0.429447	0.281837	0.711284	0.0583536	hypo	0
chr17	7930778	7931003	3	-0.429304	0.453208	0.882511	0.0544226	hypo	0
chr13	27827249	27827947	10	-0.429073	0.271897	0.70097	0.068332	hypo	0
chr9	33988699	33989040	13	-0.429048	0.427402	0.85645	0.0582707	hypo	0
chr21	47415418	47415566	3	-0.42878	0.362433	0.791212	0.0694748	hypo	0
chr6	33240820	33242569	27	-0.428633	0.246595	0.675228	0.0548126	hypo	0
chr6	10720537	10720583	6	0.428449	0.569205	0.140755	0.0697794	hyper	0
chr3	171753870	171754072	4	-0.428222	0.364282	0.792504	0.0594413	hypo	0
chr11	121324418	121324670	4	-0.428174	0.244035	0.672209	0.0614105	hypo	0
chr12	123029377	123030412	11	-0.427958	0.281557	0.709516	0.0567957	hypo	0
chr17	33407972	33408073	3	-0.427886	0.360815	0.788701	0.0548339	hypo	0
chr7	7608315	7609574	14	-0.427703	0.0922987	0.520001	0.0576702	hypo	0
chr1	169883799	169884901	21	-0.427658	0.369366	0.797024	0.0590509	hypo	0
chr6	110013947	110014241	7	-0.427492	0.306696	0.734188	0.0603288	hypo	0
chr17	40730989	40731388	10	-0.427349	0.240156	0.667505	0.0608742	hypo	0
chr3	53204367	53204933	11	-0.426964	0.299057	0.72602	0.068798	hypo	0
chr2	99158460	99158723	9	-0.42683	0.502564	0.929394	0.0739642	hypo	0
chr18	45380368	45380813	5	-0.426791	0.390306	0.817097	0.0666354	hypo	0
chr14	71991451	71991847	6	-0.426618	0.3965	0.823118	0.0556014	hypo	0
chr6	10530584	10531259	13	-0.426516	0.13234	0.558855	0.0595265	hypo	0
chr1	76250158	76250937	22	-0.425965	0.174409	0.600374	0.0641361	hypo	0
chr3	113252904	113253116	3	-0.42596	0.35586	0.78182	0.055622	hypo	0
chr14	95969920	95970818	9	-0.42552	0.288566	0.714087	0.0576042	hypo	0
chr17	65819618	65820081	8	-0.425515	0.229742	0.655258	0.0585638	hypo	0
chr14	60671895	60672164	4	-0.42533	0.264944	0.690273	0.0526841	hypo	0
chr7	148935735	148936061	12	-0.425278	0.296274	0.721551	0.0636757	hypo	0
chr5	149155903	149156898	10	-0.425277	0.374979	0.800256	0.05892	hypo	0
chr16	23852161	23852652	9	-0.424898	0.365933	0.790831	0.0663671	hypo	0
chr4	119755321	119755761	5	-0.424816	0.364678	0.789494	0.0523003	hypo	0
chr4	3079215	3080172	9	-0.424643	0.167812	0.592455	0.0591696	hypo	0
chr15	35286236	35286713	7	-0.424628	0.420058	0.844686	0.0560085	hypo	0
chr12	829440	829638	3	-0.424433	0.227825	0.652258	0.0662173	hypo	0
chr5	139912162	139913290	20	-0.424275	0.190303	0.614578	0.0645668	hypo	0
chr11	65905391	65906648	15	-0.424119	0.215988	0.640107	0.0550321	hypo	0
chr1	113497234	113497695	4	-0.423915	0.255793	0.679708	0.054569	hypo	0
chr12	125030916	125031117	5	-0.423829	0.318194	0.742023	0.0693804	hypo	0
chr6	113948321	113949462	8	-0.423467	0.207303	0.630769	0.0523465	hypo	0
chr10	97049232	97049907	10	-0.423377	0.385289	0.808666	0.0652281	hypo	0
chr6	16421878	16422141	6	-0.423356	0.293577	0.716933	0.054394	hypo	0
chr10	63927238	63927654	4	-0.423171	0.306657	0.729828	0.0622775	hypo	0
chr19	40170150	40171237	13	-0.423002	0.357347	0.780349	0.063587	hypo	0
chr14	55564987	55565418	5	-0.422955	0.290566	0.713521	0.0587267	hypo	0
chrX	123011547	123011748	10	-0.422684	0.291255	0.713939	0.0753874	hypo	0
chr14	68647848	68648563	6	-0.422633	0.43998	0.862613	0.0518732	hypo	0
chr2	191776270	191776725	4	-0.422424	0.527885	0.950309	0.0591042	hypo	0
chr7	116167132	116167290	3	-0.422416	0.242733	0.665149	0.05534	hypo	0
chr4	6771203	6771810	8	-0.422395	0.418765	0.841159	0.0548963	hypo	0
chr1	149983074	149983278	3	-0.422391	0.295382	0.717774	0.0588911	hypo	0
chr8	101318182	101318465	3	-0.422387	0.320724	0.743111	0.0574385	hypo	0
chr8	128314770	128314866	3	-0.422305	0.120949	0.543254	0.0632867	hypo	0
chr20	62359609	62360092	9	-0.42228	0.0849754	0.507255	0.0601733	hypo	0
chr16	30036934	30037080	4	-0.421998	0.267858	0.689856	0.0674815	hypo	0
chr2	70387789	70387989	5	-0.421946	0.522107	0.944053	0.0600008	hypo	0
chr1	27745099	27745212	3	-0.421934	0.329668	0.751602	0.0770225	hypo	0
chr1	3403344	3403797	4	-0.421782	0.379309	0.801091	0.0602996	hypo	0
chr17	1598610	1598853	7	-0.421753	0.494735	0.916488	0.0580821	hypo	0
chr9	34619416	34619751	5	-0.421738	0.31405	0.735789	0.061686	hypo	0
chr16	11875806	11876195	7	-0.421634	0.196732	0.618366	0.0707095	hypo	0
chr14	65881406	65881787	4	-0.421625	0.31338	0.735005	0.0561616	hypo	0
chr2	120981591	120981746	4	-0.421398	0.227204	0.648601	0.0649575	hypo	0
chr12	123912510	123912978	19	-0.421262	0.257666	0.678929	0.0600276	hypo	0
chr7	138604951	138605054	3	-0.421084	0.419934	0.841018	0.055158	hypo	0
chr2	10585906	10587339	30	-0.420833	0.230489	0.651322	0.0569618	hypo	0
chr9	114746192	114746270	3	-0.420733	0.102167	0.5229	0.0576673	hypo	0
chr2	17936530	17936945	4	-0.42066	0.147374	0.568035	0.0543226	hypo	0
chr15	59596869	59596943	3	-0.42049	0.431551	0.852041	0.0590489	hypo	0
chr20	47356037	47356176	5	-0.420347	0.185634	0.605981	0.0695987	hypo	0
chr8	42034558	42034983	8	-0.420001	0.26539	0.685391	0.0653734	hypo	0
chr2	65217783	65218155	5	-0.419999	0.292389	0.712388	0.0565715	hypo	0
chr8	62622458	62622778	4	-0.419987	0.347433	0.767421	0.0546576	hypo	0
chr21	45827489	45827615	4	-0.419784	0.486149	0.905933	0.0685385	hypo	0
chr5	124309809	124310458	5	-0.419746	0.339372	0.759118	0.063201	hypo	0
chr18	77164805	77165493	22	-0.41972	0.427222	0.846942	0.0573885	hypo	0
chr11	109827882	109828209	7	-0.419672	0.447941	0.867613	0.0592225	hypo	0
chr1	121367523	121367765	7	-0.419519	0.509008	0.928527	0.0549172	hypo	0
chr10	43914018	43914024	3	-0.41945	0.379644	0.799093	0.0619205	hypo	0
chr12	1701797	1702130	8	-0.419026	0.148223	0.567249	0.069195	hypo	0
chr13	49552245	49552867	7	-0.419024	0.191043	0.610068	0.0580637	hypo	0
chr11	503270	503546	8	-0.419024	0.358844	0.777868	0.0699315	hypo	0
chr9	123640413	123641262	9	-0.418683	0.300361	0.719044	0.0706009	hypo	0
chr10	125763997	125764287	5	-0.418549	0.47216	0.89071	0.0536382	hypo	0
chr4	47841121	47841645	6	-0.41832	0.450117	0.868437	0.0591088	hypo	0
chr14	55565758	55566075	3	-0.418185	0.300838	0.719022	0.0609102	hypo	0
chr9	126689421	126689514	3	-0.418144	0.353675	0.771819	0.0646595	hypo	0
chr11	126058515	126058900	11	-0.418118	0.341823	0.759941	0.0655694	hypo	0
chr1	206911580	206911929	4	-0.418057	0.293046	0.711103	0.0589315	hypo	0
chr16	67820568	67821066	8	-0.417731	0.324279	0.74201	0.0593756	hypo	0
chr10	12085902	12086467	22	-0.417609	0.147913	0.565522	0.0627124	hypo	0
chr14	69863463	69863821	6	-0.417319	0.330411	0.74773	0.0578931	hypo	0
chr4	40665168	40665789	11	-0.417129	0.491673	0.908802	0.0652785	hypo	0
chr22	50979643	50980818	14	-0.417088	0.136497	0.553585	0.0635188	hypo	0
chr3	23871059	23871401	4	-0.416991	0.366044	0.783035	0.0576887	hypo	0
chr5	156502306	156502961	10	-0.416936	0.439688	0.856624	0.0621163	hypo	0
chr19	2395004	2395049	4	-0.416842	0.361568	0.77841	0.0650567	hypo	0
chr6	16471305	16472398	12	-0.416825	0.274579	0.691404	0.0539522	hypo	0
chr16	56644248	56644478	7	-0.416566	0.178533	0.595099	0.0642738	hypo	0
chr22	35741080	35741300	6	-0.416563	0.397975	0.814538	0.070486	hypo	0
chr19	58817535	58817570	5	-0.41645	0.255193	0.671644	0.0777414	hypo	0
chr14	62128905	62130502	25	-0.416357	0.208893	0.62525	0.0542075	hypo	0
chr6	119218147	119218409	5	-0.416302	0.493122	0.909424	0.0589584	hypo	0
chr10	63865936	63866238	6	-0.416228	0.240802	0.65703	0.0691195	hypo	0
chr5	149184486	149185769	20	-0.416143	0.328863	0.745006	0.0594255	hypo	0
chr6	167368393	167368544	4	-0.415993	0.417731	0.833724	0.0563784	hypo	0
chr15	79269735	79270911	15	-0.415867	0.185609	0.601476	0.0614785	hypo	0
chr16	81686309	81686972	18	-0.415723	0.410521	0.826245	0.0633065	hypo	0
chr10	112117251	112117579	12	-0.415707	0.199958	0.615664	0.0653182	hypo	0
chr16	14443808	14444596	17	-0.415706	0.404121	0.819828	0.0601773	hypo	0
chr16	791561	791696	5	-0.415634	0.288102	0.703735	0.0569292	hypo	0
chr12	125404275	125404991	16	-0.415609	0.12566	0.541269	0.0605204	hypo	0
chr1	226273255	226273389	6	-0.415516	0.263975	0.679491	0.0632195	hypo	0
chr22	37813836	37814102	4	-0.415307	0.480465	0.895773	0.0641032	hypo	0
chr18	60381879	60381922	3	-0.415302	0.354776	0.770078	0.052619	hypo	0
chr10	74857258	74857437	4	-0.415151	0.348419	0.76357	0.055708	hypo	0
chr17	74260387	74260661	6	-0.415096	0.264803	0.679899	0.0594263	hypo	0
chr12	131455022	131455211	6	-0.41468	0.301759	0.716438	0.0559429	hypo	0
chr12	6943962	6944405	7	-0.414679	0.429465	0.844143	0.060634	hypo	0
chr2	29119086	29119951	8	-0.414611	0.186419	0.60103	0.0547593	hypo	0
chr9	5630690	5631184	4	-0.414547	0.229834	0.644382	0.0553615	hypo	0
chr8	103836385	103837204	10	-0.414506	0.272256	0.686763	0.0604241	hypo	0
chr11	67033300	67033500	6	-0.414486	0.328989	0.743475	0.0583235	hypo	0
chr1	22106033	22107003	13	-0.414374	0.216998	0.631372	0.0663667	hypo	0
chr19	16654604	16654672	4	-0.414352	0.267399	0.681752	0.0687873	hypo	0
chr1	113177803	113179164	21	-0.414245	0.173353	0.587598	0.0577607	hypo	0
chr18	51795138	51795329	3	-0.414042	0.287931	0.701973	0.057398	hypo	0
chr11	18654598	18654886	7	-0.413938	0.0487441	0.462682	0.0548294	hypo	0
chr10	63865162	63865483	3	-0.413812	0.24694	0.660751	0.0691195	hypo	0
chr3	176919547	176919713	6	-0.41366	0.191869	0.605529	0.0741526	hypo	0
chr14	74162875	74163654	5	-0.41352	0.296956	0.710476	0.0534621	hypo	0
chr12	95609372	95609903	4	-0.413436	0.257638	0.671074	0.0581442	hypo	0
chr20	62481933	62482157	6	-0.41323	0.286375	0.699605	0.0681162	hypo	0
chr19	10213465	10213817	7	-0.413103	0.113895	0.526998	0.0578797	hypo	0
chr22	39714193	39714420	5	-0.412402	0.193375	0.605777	0.0594947	hypo	0
chr6	155497667	155498116	12	-0.412279	0.391259	0.803538	0.066354	hypo	0
chr7	27124094	27124857	7	-0.412256	0.478919	0.891175	0.0542856	hypo	0
chr3	184033532	184034140	10	-0.412171	0.310129	0.722301	0.0643124	hypo	0
chr2	172013870	172014013	4	-0.412109	0.505679	0.917788	0.0553503	hypo	0
chr1	24553745	24554137	10	-0.41174	0.321756	0.733495	0.0532002	hypo	0
chr2	75875123	75875210	3	-0.411568	0.492846	0.904414	0.0622139	hypo	0
chr5	95294366	95295280	7	-0.411204	0.496524	0.907728	0.0671279	hypo	0
chr16	16199922	16199985	4	-0.411189	0.451628	0.862817	0.0800315	hypo	0
chr15	45027815	45028715	11	-0.410986	0.262442	0.673428	0.0533014	hypo	0
chr17	1973362	1974296	21	-0.410971	0.169912	0.580883	0.0727085	hypo	0
chr2	101010805	101011086	8	-0.410744	0.139076	0.549819	0.0620074	hypo	0
chr15	60968092	60968639	7	-0.410395	0.461731	0.872126	0.0534992	hypo	0
chr1	206914222	206915143	11	-0.410297	0.321787	0.732084	0.0536669	hypo	0
chr3	178787464	178787776	3	-0.410222	0.491912	0.902135	0.0581195	hypo	0
chr19	3760929	3760967	3	-0.410056	0.30981	0.719866	0.0619505	hypo	0
chr7	407247	407308	4	-0.40988	0.302019	0.711899	0.0701572	hypo	0
chr22	18250036	18250803	14	-0.409786	0.272586	0.682372	0.0693312	hypo	0
chr8	103825756	103825957	4	-0.409707	0.25935	0.669057	0.059294	hypo	0
chr16	11198819	11199622	8	-0.409625	0.246808	0.656433	0.0598806	hypo	0
chr10	111682258	111682541	3	-0.409408	0.233686	0.643094	0.0582015	hypo	0
chr9	19233693	19234053	4	-0.40935	0.276146	0.685496	0.0557323	hypo	0
chr6	11712323	11713286	15	-0.409177	0.235323	0.644501	0.0636036	hypo	0
chr19	4830783	4830975	3	-0.409036	0.256451	0.665487	0.0675035	hypo	0
chr2	43630344	43630647	5	-0.408856	0.389245	0.798101	0.057881	hypo	0
chr10	77152949	77153354	4	-0.408798	0.463995	0.872792	0.06073	hypo	0
chr14	60670856	60671567	9	-0.408632	0.276195	0.684827	0.0525536	hypo	0
chr18	21573213	21573558	3	-0.408576	0.41523	0.823806	0.056545	hypo	0
chr1	221917314	221917691	9	-0.408538	0.253261	0.661799	0.0586881	hypo	0
chr6	34629729	34631070	16	-0.40846	0.411619	0.820078	0.0544179	hypo	0
chr17	78851601	78851865	4	-0.408367	0.245499	0.653866	0.0652584	hypo	0
chr13	114048885	114049018	4	-0.408291	0.352526	0.760817	0.0637956	hypo	0
chr3	57097465	57098092	6	-0.408186	0.429617	0.837803	0.0551225	hypo	0
chr18	13569173	13569433	6	-0.408124	0.305973	0.714097	0.061574	hypo	0
chr2	241100208	241100242	3	-0.408106	0.481864	0.88997	0.0575422	hypo	0
chr19	2781878	2782171	5	-0.408089	0.237014	0.645103	0.0583782	hypo	0
chr2	70330670	70330714	5	-0.407855	0.302191	0.710046	0.0655604	hypo	0
chr7	64347599	64348024	6	-0.407759	0.348748	0.756507	0.0580676	hypo	0
chr2	25645335	25645360	4	-0.407687	0.295135	0.702822	0.066937	hypo	0
chr4	3078653	3078891	7	-0.407638	0.278288	0.685925	0.0590977	hypo	0
chr4	186133374	186133685	4	-0.407624	0.430085	0.837709	0.0688134	hypo	0
chr6	159212889	159213617	13	-0.40755	0.487142	0.894692	0.0612026	hypo	0
chr6	111612265	111612476	4	-0.40754	0.508117	0.915658	0.0538653	hypo	0
chr3	23872290	23872526	4	-0.407442	0.382948	0.79039	0.0583969	hypo	0
chr6	154567331	154567692	7	-0.40744	0.388881	0.796321	0.0582658	hypo	0
chr7	22912141	22912313	4	-0.406942	0.42189	0.828832	0.0551175	hypo	0
chr7	22911707	22911762	4	-0.406916	0.41413	0.821045	0.0551175	hypo	0
chr19	5974629	5974899	10	-0.406863	0.359057	0.76592	0.0654627	hypo	0
chr12	4644252	4644480	5	-0.406563	0.476502	0.883065	0.0624937	hypo	0
chr6	7110547	7110773	5	-0.406556	0.385886	0.792442	0.0681841	hypo	0
chr12	26270174	26270966	9	-0.406356	0.239022	0.645378	0.060531	hypo	0
chr8	107756983	107757319	3	-0.406129	0.430439	0.836567	0.0589793	hypo	0
chr20	50789951	50790416	7	-0.405911	0.393166	0.799077	0.0657092	hypo	0
chr9	98614663	98615775	12	-0.405887	0.281209	0.687096	0.056433	hypo	0
chr16	23347229	23347942	13	-0.405886	0.255921	0.661807	0.0585774	hypo	0
chr11	94276304	94276511	7	-0.405636	0.349762	0.755397	0.0605941	hypo	0
chr6	33590036	33590135	3	-0.405513	0.261112	0.666625	0.0593142	hypo	0
chr2	25384383	25384441	8	0.405488	0.540996	0.135508	0.0781552	hyper	0
chr19	11290085	11290361	5	-0.405146	0.22242	0.627566	0.0614527	hypo	0
chr21	43253319	43253988	10	-0.405129	0.328953	0.734082	0.0677169	hypo	0
chr1	1711213	1711393	5	-0.404958	0.12357	0.528527	0.0651567	hypo	0
chr8	60028302	60028461	4	-0.404913	0.377066	0.78198	0.0670752	hypo	0
chr10	131330493	131330658	3	-0.404549	0.452827	0.857376	0.0717342	hypo	0
chr9	88966808	88966953	3	-0.40434	0.14619	0.550529	0.0638616	hypo	0
chr20	49461129	49461686	10	-0.404146	0.385172	0.789318	0.0578568	hypo	0
chr19	16700220	16700439	3	-0.403998	0.223997	0.627995	0.0618369	hypo	0
chr9	98224245	98224385	3	-0.403973	0.270267	0.67424	0.0589893	hypo	0
chr3	193998355	193999031	6	-0.403824	0.542156	0.94598	0.0551092	hypo	0
chr17	40833276	40833833	7	-0.403759	0.236162	0.639921	0.0710741	hypo	0
chr1	11730652	11731244	11	-0.40363	0.372422	0.776052	0.0548997	hypo	0
chr1	16350123	16350507	7	-0.40353	0.468826	0.872356	0.057488	hypo	0
chr12	120449751	120450379	15	-0.403405	0.360491	0.763896	0.058948	hypo	0
chr12	56322318	56322797	10	-0.403297	0.330702	0.733999	0.0690474	hypo	0
chr11	1875118	1875409	9	-0.40325	0.0443757	0.447626	0.066495	hypo	0
chr16	15745384	15745664	14	-0.403246	0.113112	0.516358	0.0549588	hypo	0
chr2	97201981	97202143	5	-0.403025	0.372439	0.775464	0.0619651	hypo	0
chr6	106970383	106971082	8	-0.40298	0.180198	0.583179	0.0524924	hypo	0
chr1	173834077	173834831	9	-0.402634	0.303088	0.705722	0.0535583	hypo	0
chr1	183775634	183776428	8	-0.402568	0.356397	0.758965	0.0612936	hypo	0
chr8	47158014	47158166	6	-0.402428	0.34971	0.752139	0.057862	hypo	0
chr11	61561290	61561549	3	-0.402428	0.2376	0.640028	0.0589337	hypo	0
chr21	37399850	37400276	7	-0.402408	0.445733	0.848141	0.056649	hypo	0
chr16	87732063	87732289	7	-0.402298	0.251268	0.653566	0.0731347	hypo	0
chr20	47784022	47784656	6	-0.402168	0.417818	0.819986	0.0573925	hypo	0
chr6	31544751	31545239	7	-0.402022	0.215418	0.61744	0.0612848	hypo	0
chr3	50316909	50317223	3	-0.401725	0.511079	0.912803	0.0555803	hypo	0
chr8	144606571	144606739	7	0.401676	0.834939	0.433263	0.0594085	hyper	0
chr16	67540915	67541552	14	-0.401657	0.439666	0.841323	0.0571831	hypo	0
chr7	140135183	140135701	24	0.401187	0.823126	0.421939	0.0776401	hyper	0
chr19	47288364	47289271	19	-0.401124	0.136669	0.537793	0.0580327	hypo	0
chr6	149374791	149375316	6	-0.401119	0.37296	0.774079	0.0565658	hypo	0
chr11	117857873	117858438	15	-0.401052	0.0401678	0.441219	0.0657696	hypo	0
chr2	43629207	43629435	5	-0.400765	0.394567	0.795331	0.057881	hypo	0
chr3	197440451	197440636	3	-0.400463	0.283799	0.684262	0.0581846	hypo	0
chr3	101566304	101566345	3	-0.400433	0.519524	0.919956	0.0638772	hypo	0
chr8	146010273	146010416	3	-0.400065	0.39381	0.793875	0.0639913	hypo	0
chr5	176731640	176731960	13	-0.399839	0.208273	0.608112	0.06016	hypo	0
chr8	98658888	98659090	5	-0.399637	0.100982	0.50062	0.0561153	hypo	0
chr9	92081483	92082228	16	-0.399539	0.262239	0.661777	0.0693231	hypo	0
chr17	37641706	37642058	7	-0.399365	0.501567	0.900933	0.0570522	hypo	0
chr14	75999631	75999765	6	-0.399242	0.478669	0.877911	0.0671899	hypo	0
chr1	101773436	101774300	10	-0.399212	0.20909	0.608302	0.0629073	hypo	0
chr3	122401129	122401343	4	-0.39919	0.179415	0.578605	0.0723196	hypo	0
chr14	57286052	57286413	4	-0.399152	0.42365	0.822802	0.0527192	hypo	0
chr8	101398267	101398873	11	-0.399115	0.321073	0.720188	0.0568591	hypo	0
chr15	67378565	67379076	3	-0.398842	0.117748	0.516589	0.060209	hypo	0
chr6	113947117	113947801	6	-0.398625	0.432267	0.830892	0.0523465	hypo	0
chr8	128220283	128220503	3	-0.398472	0.374479	0.772951	0.0558515	hypo	0
chr19	49992720	49993019	6	-0.39838	0.320365	0.718745	0.0696143	hypo	0
chr16	71879202	71879234	3	-0.398083	0.349852	0.747935	0.0694428	hypo	0
chr11	110165733	110165775	3	-0.398039	0.350398	0.748438	0.060073	hypo	0
chr1	40064079	40064325	9	-0.397986	0.320423	0.718409	0.0542492	hypo	0
chr1	78446133	78446289	3	-0.397731	0.340556	0.738287	0.057163	hypo	0
chr16	10369291	10369708	6	-0.397696	0.39927	0.796966	0.0667299	hypo	0
chr1	111685087	111685261	4	-0.397595	0.222603	0.620198	0.0584595	hypo	0
chr4	40630588	40631045	7	-0.397398	0.320497	0.717895	0.0567591	hypo	0
chr2	214017916	214018368	6	-0.397294	0.217508	0.614802	0.0605835	hypo	0
chr6	86350540	86350652	3	-0.397264	0.234672	0.631937	0.0562408	hypo	0
chr8	128219748	128219959	3	-0.397218	0.406924	0.804142	0.0553418	hypo	0
chr16	8985008	8985163	6	-0.397082	0.232667	0.629749	0.0627455	hypo	0
chr19	11206686	11207177	8	-0.396841	0.269134	0.665975	0.0593322	hypo	0
chr11	65903563	65904551	16	-0.396636	0.261919	0.658555	0.0550112	hypo	0
chr17	37650031	37650148	5	-0.396538	0.277184	0.673722	0.0661675	hypo	0
chr22	38056047	38056475	8	-0.396316	0.256839	0.653156	0.0692405	hypo	0
chr2	97002201	97002917	7	-0.396243	0.218017	0.61426	0.0607694	hypo	0
chr1	203734167	203734895	16	-0.396176	0.29053	0.686706	0.0670382	hypo	0
chr14	62127798	62128440	10	-0.396115	0.363283	0.759398	0.0535332	hypo	0
chr15	23075272	23075322	4	-0.396092	0.505957	0.902049	0.061493	hypo	0
chr7	98470155	98470645	5	-0.396009	0.416871	0.81288	0.055268	hypo	0
chr2	70388414	70388844	7	-0.395955	0.522535	0.918489	0.0600008	hypo	0
chr1	40421907	40422169	6	-0.395812	0.346933	0.742744	0.0642595	hypo	0
chr12	852357	853809	14	-0.395628	0.211276	0.606904	0.0520591	hypo	0
chr19	16266504	16266715	9	-0.395346	0.352267	0.747614	0.0564064	hypo	0
chr4	175203483	175203827	3	-0.395236	0.415278	0.810514	0.0531295	hypo	0
chr2	39345419	39345810	4	-0.395072	0.385504	0.780576	0.0536501	hypo	0
chr20	62256973	62257200	7	-0.394901	0.312885	0.707786	0.0608859	hypo	0
chr5	156501757	156501950	8	-0.394829	0.473725	0.868554	0.0621099	hypo	0
chr2	203243127	203243687	6	-0.394755	0.120057	0.514812	0.0572169	hypo	0
chr4	100772766	100773391	12	-0.394396	0.230045	0.624441	0.0552398	hypo	0
chr4	83827598	83827765	4	-0.394333	0.358814	0.753148	0.0538141	hypo	0
chr4	100773862	100774131	4	-0.394323	0.420422	0.814745	0.0552398	hypo	0
chr15	85202272	85202501	4	-0.394292	0.290531	0.684823	0.0595137	hypo	0
chr14	93152935	93153344	6	-0.394236	0.419364	0.8136	0.0567233	hypo	0
chr5	953144	953580	7	-0.394185	0.44982	0.844005	0.063643	hypo	0
chr6	159237124	159238111	14	-0.39418	0.077297	0.471477	0.0570424	hypo	0
chr20	56058034	56058829	20	-0.393892	0.506101	0.899994	0.0617705	hypo	0
chr2	157196601	157197124	4	-0.39386	0.451055	0.844915	0.0558156	hypo	0
chr19	38423940	38424037	3	-0.393744	0.246757	0.640502	0.0678424	hypo	0
chr11	826530	826668	5	-0.393688	0.244502	0.63819	0.0696984	hypo	0
chr11	44116477	44116723	6	-0.393479	0.369176	0.762654	0.0627691	hypo	0
chr11	85961343	85961645	6	-0.39314	0.400067	0.793207	0.0586894	hypo	0
chr1	20037346	20038554	15	-0.393117	0.476074	0.869191	0.0591289	hypo	0
chr16	86002723	86003515	12	-0.393068	0.281596	0.674664	0.0616884	hypo	0
chr10	60029867	60029927	3	-0.392791	0.434611	0.827402	0.0542241	hypo	0
chr6	149375658	149376051	5	-0.392612	0.271464	0.664077	0.0563338	hypo	0
chr17	28086951	28086967	3	-0.392548	0.269971	0.662519	0.0559692	hypo	0
chr12	27487028	27487176	6	-0.392508	0.0531544	0.445663	0.0525343	hypo	0
chr16	2977709	2977778	5	-0.392263	0.364459	0.756722	0.0670901	hypo	0
chr3	11686044	11686192	6	-0.392139	0.455725	0.847864	0.0584171	hypo	0
chr8	11717559	11718739	17	-0.392053	0.256457	0.64851	0.0637564	hypo	0
chr7	97475673	97476126	4	-0.392051	0.409536	0.801587	0.0542358	hypo	0
chr19	10212249	10212419	3	-0.391807	0.315757	0.707565	0.057868	hypo	0
chr14	50549292	50551279	31	-0.391697	0.129898	0.521596	0.0638209	hypo	0
chr6	3783345	3783502	3	-0.391452	0.544967	0.936419	0.0530599	hypo	0
chr22	27067321	27068004	9	-0.391416	0.292156	0.683571	0.0578783	hypo	0
chr19	3984133	3984379	15	-0.391342	0.13145	0.522792	0.056237	hypo	0
chr1	151161329	151161584	11	-0.390778	0.363001	0.753779	0.0674215	hypo	0
chr1	219361742	219361962	3	-0.390736	0.320968	0.711704	0.0595465	hypo	0
chr19	1903113	1903276	3	-0.39059	0.313798	0.704388	0.0656158	hypo	0
chr21	44300287	44300309	3	-0.390567	0.235977	0.626544	0.0560842	hypo	0
chr21	38604620	38604982	14	-0.390525	0.274056	0.66458	0.07151	hypo	0
chr15	64454293	64454495	5	-0.390467	0.268427	0.658894	0.057634	hypo	0
chr17	47753274	47753561	7	-0.390204	0.281781	0.671985	0.058321	hypo	0
chr15	86235789	86236706	14	-0.390183	0.209532	0.599716	0.0521436	hypo	0
chr11	1507534	1507548	3	-0.390115	0.525659	0.915774	0.0660299	hypo	0
chr11	33964547	33965204	10	-0.390114	0.429277	0.819391	0.0571641	hypo	0
chr4	53579633	53580065	10	-0.390078	0.328448	0.718526	0.0569614	hypo	0
chr10	89628800	89629831	12	-0.389996	0.330387	0.720382	0.0532556	hypo	0
chr5	154138393	154138607	4	-0.389968	0.231096	0.621063	0.0566492	hypo	0
chr1	2993019	2994051	18	-0.389891	0.431515	0.821406	0.0617841	hypo	0
chr1	91488275	91488438	3	-0.389809	0.350954	0.740763	0.0635959	hypo	0
chr6	26600049	26600354	4	-0.389291	0.478547	0.867839	0.0555949	hypo	0
chr16	85935022	85935779	11	-0.389236	0.0725988	0.461835	0.0611621	hypo	0
chr19	19780507	19780932	12	-0.388921	0.40903	0.797951	0.0694066	hypo	0
chr16	11076158	11076815	19	-0.388854	0.274774	0.663628	0.0690778	hypo	0
chr7	148763274	148763313	5	-0.388821	0.263269	0.65209	0.0640823	hypo	0
chr3	12690104	12690473	12	-0.388791	0.450861	0.839652	0.0557626	hypo	0
chr17	37641013	37641250	10	-0.388632	0.497472	0.886103	0.0570522	hypo	0
chr2	217364893	217365225	5	-0.388247	0.301859	0.690106	0.0520604	hypo	0
chr6	106562527	106562877	8	-0.387966	0.407165	0.795131	0.0627943	hypo	0
chr19	47689694	47690235	13	-0.387904	0.400861	0.788765	0.0726151	hypo	0
chr3	97484571	97484765	4	-0.387817	0.457447	0.845264	0.0524919	hypo	0
chr3	194973607	194973998	8	-0.387661	0.497629	0.88529	0.0568654	hypo	0
chr19	33137117	33137254	5	-0.387598	0.482712	0.870311	0.0575378	hypo	0
chr1	31883747	31884302	11	-0.38726	0.351418	0.738678	0.0569704	hypo	0
chr5	175949664	175949804	6	-0.387233	0.431486	0.818719	0.05942	hypo	0
chr3	10268074	10268107	3	-0.387216	0.42297	0.810186	0.065178	hypo	0
chr2	62372958	62373487	8	-0.387197	0.455945	0.843141	0.0575641	hypo	0
chr2	65141186	65141728	15	-0.387159	0.155119	0.542278	0.0583512	hypo	0
chr9	116142646	116143277	6	-0.38711	0.396205	0.783314	0.0620696	hypo	0
chr1	6307676	6307800	4	-0.386981	0.379081	0.766062	0.0647982	hypo	0
chr8	141598962	141599225	11	-0.386789	0.321667	0.708456	0.0657676	hypo	0
chr2	10553879	10554204	6	-0.386704	0.490597	0.877301	0.0646976	hypo	0
chr14	63957918	63958479	7	-0.386702	0.445509	0.83221	0.0615057	hypo	0
chr5	170817672	170818060	9	-0.386625	0.280861	0.667486	0.0589123	hypo	0
chr1	100541610	100542018	4	-0.386575	0.492221	0.878796	0.0563911	hypo	0
chr10	5904536	5904628	5	-0.386375	0.315093	0.701468	0.064573	hypo	0
chr7	102065618	102065651	3	-0.386339	0.11965	0.50599	0.0654394	hypo	0
chr8	613790	614126	14	-0.386267	0.356403	0.742671	0.0597511	hypo	0
chr7	141349039	141349531	8	-0.386221	0.285166	0.671387	0.0632335	hypo	0
chr19	13894267	13894618	7	-0.386077	0.43268	0.818757	0.0648047	hypo	0
chr4	71767388	71767407	3	-0.386009	0.321801	0.70781	0.0583395	hypo	0
chr15	65925302	65925462	3	-0.385806	0.481495	0.867301	0.0550582	hypo	0
chr1	176146822	176147311	4	-0.385709	0.508376	0.894085	0.0538325	hypo	0
chr10	69832245	69832920	5	-0.385477	0.491087	0.876564	0.0565495	hypo	0
chr12	31473958	31474692	5	-0.385452	0.260828	0.64628	0.0582874	hypo	0
chr1	28906382	28906765	9	-0.38543	0.32657	0.712	0.0681182	hypo	0
chr1	243751617	243752707	13	-0.38522	0.297234	0.682454	0.0572224	hypo	0
chr12	132565469	132565696	8	-0.38512	0.494421	0.879541	0.0714147	hypo	0
chr3	23853015	23853328	3	-0.385072	0.347019	0.732091	0.0578524	hypo	0
chr1	67806820	67807056	4	-0.38507	0.378748	0.763818	0.053729	hypo	0
chr18	12076795	12077147	5	0.384675	0.665439	0.280764	0.0641892	hyper	0
chr10	12504879	12505356	7	-0.384537	0.433278	0.817815	0.0551541	hypo	0
chr9	71323344	71323860	5	-0.384363	0.188033	0.572395	0.0538047	hypo	0
chr20	32091993	32092504	9	-0.384355	0.400194	0.78455	0.0598268	hypo	0
chr20	3225740	3225974	3	-0.384289	0.434351	0.81864	0.0566808	hypo	0
chr11	810968	811247	5	-0.384229	0.246692	0.630921	0.060271	hypo	0
chr13	48879360	48879700	5	-0.384158	0.141826	0.525984	0.0598107	hypo	0
chr8	61454763	61455023	7	-0.384001	0.491258	0.87526	0.0543541	hypo	0
chr5	142778112	142778522	7	-0.383602	0.352987	0.736589	0.0602035	hypo	0
chr8	61454108	61454422	5	-0.383428	0.48578	0.869208	0.0543541	hypo	0
chr19	4368490	4368668	7	-0.383258	0.260206	0.643464	0.0617027	hypo	0
chr12	120637268	120637811	7	-0.383239	0.254083	0.637321	0.060456	hypo	0
chr5	151042112	151042595	5	-0.383126	0.309344	0.69247	0.0585849	hypo	0
chr20	61210315	61210526	4	-0.383039	0.471561	0.854601	0.0552614	hypo	0
chr2	55281543	55281781	5	-0.382858	0.361134	0.743992	0.0665624	hypo	0
chr17	35967556	35967695	5	-0.382622	0.158585	0.541206	0.0558256	hypo	0
chr19	36704843	36704941	3	-0.382567	0.279291	0.661858	0.0561581	hypo	0
chr6	111802034	111802400	4	-0.382528	0.465218	0.847745	0.0574693	hypo	0
chr1	235268342	235269066	11	-0.382456	0.396987	0.779443	0.0570888	hypo	0
chr3	37032630	37033373	7	-0.38238	0.259489	0.641869	0.0570539	hypo	0
chr9	131444484	131444897	6	-0.38221	0.258752	0.640962	0.0591882	hypo	0
chr12	31739894	31740053	3	-0.382196	0.413262	0.795458	0.0617183	hypo	0
chr3	196001556	196001793	5	-0.382135	0.458318	0.840452	0.0626091	hypo	0
chr17	77830765	77831331	8	-0.381957	0.527191	0.909148	0.0568996	hypo	0
chr7	100140552	100141208	11	-0.381954	0.362959	0.744913	0.0632432	hypo	0
chr1	41104687	41105015	3	-0.381834	0.412293	0.794127	0.0528774	hypo	0
chr1	38182348	38182695	4	-0.381587	0.469022	0.850609	0.0552758	hypo	0
chr8	104425838	104426171	5	-0.381478	0.229786	0.611264	0.0608871	hypo	0
chr14	73756266	73757313	6	-0.381432	0.431119	0.812551	0.0571764	hypo	0
chr13	114058267	114058279	3	-0.38111	0.554635	0.935745	0.0575723	hypo	0
chr1	28571410	28571841	12	-0.381058	0.134732	0.51579	0.0597708	hypo	0
chr7	2444940	2445377	11	-0.381047	0.290293	0.67134	0.0582277	hypo	0
chr4	26181605	26181921	5	-0.380794	0.444052	0.824845	0.0589443	hypo	0
chr2	203243995	203244284	3	-0.38077	0.20706	0.587831	0.0586957	hypo	0
chr6	28946431	28946749	6	-0.380727	0.383723	0.764451	0.071514	hypo	0
chr18	47017458	47017768	5	-0.380699	0.226987	0.607686	0.0612312	hypo	0
chr22	24108930	24109185	6	-0.380683	0.187466	0.568149	0.067272	hypo	0
chr11	66248459	66248587	5	-0.380554	0.377361	0.757914	0.0574288	hypo	0
chr12	7078455	7078954	11	-0.380515	0.333419	0.713934	0.0574984	hypo	0
chr2	129078456	129078512	3	-0.3803	0.580325	0.960624	0.060984	hypo	0
chr17	16311684	16312202	10	-0.380194	0.190801	0.570995	0.0619231	hypo	0
chr22	32056880	32057065	6	-0.380005	0.348268	0.728274	0.0599511	hypo	0
chr2	144488668	144489332	5	-0.379918	0.412187	0.792106	0.0595383	hypo	0
chr2	64925436	64926705	9	-0.379812	0.232419	0.612231	0.0608294	hypo	0
chr6	26194631	26194887	3	-0.379786	0.337163	0.716949	0.0577485	hypo	0
chr15	31521505	31521698	3	-0.379771	0.20839	0.588161	0.0637128	hypo	0
chr14	103285756	103287070	21	-0.379506	0.353394	0.732901	0.0526355	hypo	0
chr16	88730754	88730934	7	-0.379495	0.404623	0.784118	0.0593765	hypo	0
chr13	100147743	100147896	4	-0.379333	0.431231	0.810564	0.0630967	hypo	0
chr18	57569637	57569935	6	-0.379313	0.415348	0.794661	0.0539101	hypo	0
chr12	121686411	121686788	23	-0.379303	0.490215	0.869518	0.0672104	hypo	0
chr12	31473267	31473577	4	-0.379301	0.282829	0.66213	0.0582874	hypo	0
chr12	13016015	13016187	3	-0.379254	0.522882	0.902136	0.0544737	hypo	0
chr13	28487792	28488038	5	-0.37922	0.508491	0.887711	0.0548141	hypo	0
chr15	93449469	93449544	3	-0.37914	0.311072	0.690212	0.0574568	hypo	0
chr15	42872809	42873069	7	-0.379066	0.522594	0.901661	0.0666687	hypo	0
chr11	60104824	60105330	8	-0.378617	0.377308	0.755925	0.0588085	hypo	0
chr7	4728765	4729437	18	-0.378551	0.338205	0.716757	0.055611	hypo	0
chr11	14667493	14667673	3	-0.378484	0.42959	0.808075	0.055758	hypo	0
chr12	105719901	105720532	8	-0.378456	0.545276	0.923732	0.058524	hypo	0
chr19	4242342	4242960	9	-0.378428	0.278796	0.657225	0.0677398	hypo	0
chr5	118689317	118689638	4	-0.378247	0.161487	0.539734	0.0605384	hypo	0
chr11	60105652	60106161	5	-0.378208	0.38616	0.764368	0.0585703	hypo	0
chr19	10704108	10704681	9	-0.378002	0.390863	0.768865	0.0596351	hypo	0
chr19	8275780	8275902	4	-0.377961	0.267801	0.645762	0.0694429	hypo	0
chr16	69220015	69220200	6	-0.377825	0.44031	0.818135	0.0636829	hypo	0
chr4	2920530	2920918	7	-0.377651	0.29506	0.672711	0.0603138	hypo	0
chr15	45493814	45493839	3	-0.377639	0.382184	0.759823	0.0537311	hypo	0
chr11	71702741	71704055	12	-0.377552	0.205184	0.582737	0.0559141	hypo	0
chr3	47991831	47992378	6	-0.377392	0.429714	0.807106	0.0573508	hypo	0
chr8	146016435	146016721	6	-0.377361	0.232944	0.610305	0.0669257	hypo	0
chr12	776851	777077	6	-0.377352	0.146525	0.523878	0.0536556	hypo	0
chr9	37787200	37787423	7	0.377317	0.853907	0.476591	0.0688018	hyper	0
chr10	104006353	104006782	3	-0.377083	0.368526	0.745609	0.0544318	hypo	0
chr12	93364890	93365329	3	-0.377077	0.348403	0.72548	0.0584269	hypo	0
chr4	26181041	26181302	5	-0.377053	0.410768	0.78782	0.060175	hypo	0
chr6	15359016	15359897	15	-0.377052	0.384057	0.761109	0.0581258	hypo	0
chr17	37885922	37886189	3	-0.377005	0.401061	0.778066	0.0547113	hypo	0
chr17	18764378	18764700	8	-0.37691	0.472864	0.849774	0.0656169	hypo	0
chr2	10951250	10951615	3	-0.376721	0.0416359	0.418357	0.0548448	hypo	0
chr12	68767714	68769392	18	-0.376544	0.300329	0.676873	0.0565113	hypo	0
chr10	74915984	74916219	4	-0.376506	0.565377	0.941883	0.0602361	hypo	0
chr5	157288416	157288740	5	-0.376503	0.179477	0.55598	0.0682937	hypo	0
chr11	47530352	47530711	11	-0.376481	0.397723	0.774204	0.0570045	hypo	0
chr13	28486990	28487353	5	-0.376449	0.479573	0.856022	0.055218	hypo	0
chr9	2011929	2012963	18	-0.376291	0.566962	0.943254	0.0574994	hypo	0
chr1	227013259	227013878	9	0.376142	0.714824	0.338682	0.058884	hyper	0
chr4	1874628	1875099	5	-0.375978	0.207648	0.583626	0.0569096	hypo	0
chr7	77093920	77094430	5	-0.375962	0.295495	0.671457	0.0530719	hypo	0
chr17	38309030	38309859	12	-0.375952	0.42901	0.804962	0.0612632	hypo	0
chr15	31521011	31521182	5	-0.375906	0.135603	0.511509	0.0664369	hypo	0
chr7	100129224	100129599	9	-0.37586	0.460275	0.836135	0.0598132	hypo	0
chr10	96062963	96064191	7	-0.375832	0.452773	0.828604	0.0533797	hypo	0
chr6	56973282	56973514	4	-0.375628	0.451203	0.826831	0.0544688	hypo	0
chr11	64516974	64517068	4	-0.375625	0.400157	0.775782	0.0571338	hypo	0
chr15	42261604	42261916	4	-0.375518	0.374729	0.750247	0.0571107	hypo	0
chr1	167646092	167647133	9	-0.375447	0.480682	0.856129	0.0618791	hypo	0
chr11	4117073	4117213	4	-0.375383	0.25723	0.632612	0.0586597	hypo	0
chr2	119990100	119990528	6	-0.375336	0.461086	0.836422	0.0545553	hypo	0
chr3	182513664	182513785	3	-0.375242	0.383763	0.759004	0.0539474	hypo	0
chr1	168196862	168197110	5	-0.375172	0.283591	0.658762	0.0602774	hypo	0
chr17	37642396	37643121	11	-0.375155	0.525046	0.9002	0.0570522	hypo	0
chr11	62433857	62434032	9	-0.375119	0.365448	0.740567	0.0675161	hypo	0
chr1	181060189	181060720	5	-0.375084	0.152463	0.527547	0.0534194	hypo	0
chr6	146185960	146186848	7	-0.374998	0.245578	0.620575	0.0570845	hypo	0
chr3	170586336	170586841	10	-0.374718	0.210656	0.585374	0.0536854	hypo	0
chr2	42865452	42865931	8	-0.374714	0.44434	0.819055	0.0681311	hypo	0
chr1	19786083	19786565	10	-0.374219	0.336079	0.710298	0.0648209	hypo	0
chr3	44550781	44551081	3	-0.374192	0.436274	0.810466	0.0630527	hypo	0
chr21	37669932	37670069	3	-0.374136	0.369732	0.743868	0.0617947	hypo	0
chr8	71519030	71519166	3	-0.374081	0.231773	0.605854	0.0560191	hypo	0
chr5	40754248	40754533	3	-0.374025	0.309422	0.683447	0.0543101	hypo	0
chr6	30703704	30704875	18	-0.373927	0.357527	0.731453	0.0551405	hypo	0
chr9	139233297	139233391	4	-0.373886	0.562936	0.936822	0.0574111	hypo	0
chr5	39076046	39076377	4	-0.373861	0.230916	0.604777	0.0583744	hypo	0
chr3	185919780	185920023	3	-0.373771	0.577009	0.95078	0.052821	hypo	0
chr15	23085185	23085402	7	-0.373761	0.430141	0.803902	0.0540904	hypo	0
chr12	12713239	12713593	3	-0.373591	0.405388	0.778979	0.0582983	hypo	0
chr20	62358661	62358883	5	-0.373316	0.086446	0.459762	0.0598864	hypo	0
chr3	194972613	194972721	4	-0.373142	0.42116	0.794302	0.056973	hypo	0
chr3	196002159	196002344	3	-0.373122	0.509847	0.882968	0.0626091	hypo	0
chr14	93527623	93527900	4	-0.372795	0.396456	0.769251	0.0624261	hypo	0
chr17	75097768	75097909	4	-0.372624	0.403496	0.77612	0.0692704	hypo	0
chr7	5565630	5566311	10	-0.372599	0.246309	0.618908	0.0626526	hypo	0
chr16	11269539	11270067	11	-0.372525	0.235826	0.60835	0.0615699	hypo	0
chr16	10360788	10360936	5	-0.372395	0.219739	0.592134	0.0611126	hypo	0
chr22	38385879	38386493	8	-0.372348	0.552364	0.924712	0.0601113	hypo	0
chr12	108953427	108953828	4	-0.372299	0.317172	0.689471	0.0547829	hypo	0
chr6	35992685	35992791	3	-0.372236	0.420631	0.792867	0.0620404	hypo	0
chr8	42910303	42910410	3	-0.372227	0.466786	0.839013	0.0552277	hypo	0
chr6	26420626	26420759	4	-0.372222	0.294573	0.666795	0.057183	hypo	0
chr14	65381962	65382007	3	-0.372052	0.305932	0.677984	0.0532599	hypo	0
chr17	60571690	60571837	3	-0.371977	0.517487	0.889464	0.0620977	hypo	0
chr16	29622684	29622930	6	-0.371909	0.129183	0.501092	0.063963	hypo	0
chr17	46793766	46793929	3	-0.371826	0.293278	0.665104	0.0583074	hypo	0
chr3	32924187	32924998	10	-0.371681	0.489279	0.86096	0.053612	hypo	0
chr19	2148062	2148610	14	-0.371657	0.501694	0.873351	0.0657447	hypo	0
chr1	36234376	36234452	3	-0.371639	0.192897	0.564535	0.069938	hypo	0
chr12	131358234	131358539	5	-0.371608	0.143303	0.514911	0.0549256	hypo	0
chr13	25498123	25498266	8	-0.37156	0.410738	0.782299	0.0618886	hypo	0
chr12	57079663	57079987	12	-0.371554	0.35436	0.725914	0.0605734	hypo	0
chr22	41213663	41213897	6	-0.371519	0.347788	0.719306	0.062815	hypo	0
chr19	54705890	54706156	12	-0.371283	0.274313	0.645597	0.0629249	hypo	0
chr15	42260725	42261154	5	-0.371257	0.24774	0.618997	0.0571107	hypo	0
chr19	17665679	17665873	6	-0.371232	0.374349	0.745581	0.0633831	hypo	0
chr5	100241070	100241496	6	-0.371175	0.343483	0.714658	0.0548445	hypo	0
chr21	42738842	42739555	11	-0.371133	0.251339	0.622471	0.0569883	hypo	0
chr22	37872308	37872901	9	-0.370956	0.424531	0.795487	0.0594411	hypo	0
chr12	53692961	53693054	3	-0.370882	0.348721	0.719603	0.0624102	hypo	0
chr6	155094546	155094851	6	-0.370684	0.438915	0.809599	0.0562623	hypo	0
chr16	409023	409129	8	-0.370677	0.527929	0.898606	0.0657451	hypo	0
chr1	161145843	161146272	4	-0.370487	0.52665	0.897137	0.0577846	hypo	0
chr4	100768653	100769541	19	-0.370412	0.303392	0.673804	0.054252	hypo	0
chr8	67523384	67523784	3	-0.370386	0.37138	0.741766	0.0582385	hypo	0
chr16	84761136	84761445	3	-0.370344	0.388712	0.759056	0.0612248	hypo	0
chr6	135191295	135191793	7	-0.370293	0.315087	0.68538	0.064257	hypo	0
chr12	125002891	125003254	21	0.370114	0.620478	0.250365	0.0812408	hyper	0
chr10	52301273	52302024	7	-0.370046	0.326355	0.696401	0.0549622	hypo	0
chr3	63923713	63924000	3	-0.369601	0.45123	0.820831	0.0586111	hypo	0
chr8	38861347	38861660	4	-0.369503	0.463049	0.832551	0.0616468	hypo	0
chr7	116595917	116595944	3	-0.369394	0.312043	0.681438	0.0625038	hypo	0
chr6	27098478	27098709	3	-0.369372	0.292195	0.661568	0.0557532	hypo	0
chr1	27165444	27165674	6	-0.369252	0.230877	0.600129	0.0652706	hypo	0
chr17	76170369	76170619	4	-0.369238	0.360668	0.729906	0.0664632	hypo	0
chr3	9209842	9210341	9	-0.369233	0.416283	0.785516	0.0520499	hypo	0
chr17	40769988	40770309	3	-0.369222	0.277002	0.646224	0.0623004	hypo	0
chr11	61128084	61128404	13	-0.369025	0.195969	0.564994	0.0692684	hypo	0
chr6	52148092	52148173	5	-0.368999	0.400007	0.769006	0.0567848	hypo	0
chr19	38536301	38537117	16	-0.368849	0.130366	0.499215	0.0654352	hypo	0
chr10	120837887	120838402	5	-0.368559	0.274291	0.64285	0.0588273	hypo	0
chr22	31485303	31485876	7	-0.368313	0.302971	0.671284	0.0647124	hypo	0
chr8	132917564	132917599	3	-0.368119	0.343679	0.711798	0.0560802	hypo	0
chr3	42257138	42257872	8	-0.367962	0.417135	0.785097	0.0603469	hypo	0
chr17	1800367	1800519	7	-0.367935	0.536336	0.904271	0.0541998	hypo	0
chr4	39459047	39459596	9	-0.367884	0.330181	0.698065	0.0536982	hypo	0
chr10	101768405	101768642	8	-0.367696	0.404027	0.771723	0.0580223	hypo	0
chr1	38396016	38396334	6	-0.367649	0.230668	0.598317	0.0630209	hypo	0
chr1	45955179	45955354	11	-0.367611	0.166949	0.534559	0.0574179	hypo	0
chr15	42796432	42797072	7	-0.36752	0.230644	0.598165	0.0628544	hypo	0
chr2	64833176	64833648	6	-0.367502	0.314384	0.681886	0.06349	hypo	0
chr16	30772023	30772292	6	-0.367221	0.394746	0.761967	0.0644061	hypo	0
chr3	119809604	119810238	4	-0.367046	0.341209	0.708255	0.0549072	hypo	0
chr17	60171359	60171747	4	-0.367021	0.376514	0.743535	0.0580278	hypo	0
chr11	109826644	109827002	6	-0.366977	0.471793	0.83877	0.0601619	hypo	0
chr12	1663817	1664617	9	-0.366671	0.166612	0.533283	0.0534994	hypo	0
chr4	186126212	186126367	4	-0.36654	0.283259	0.6498	0.059067	hypo	0
chr8	145648406	145648606	3	-0.366298	0.453538	0.819837	0.0585063	hypo	0
chr5	56467811	56468004	8	-0.366227	0.363317	0.729544	0.0537499	hypo	0
chr17	33409219	33409418	3	-0.366031	0.361476	0.727507	0.0547446	hypo	0
chr17	45001432	45001689	3	-0.365898	0.425038	0.790936	0.0560838	hypo	0
chr8	48874653	48874810	4	-0.365713	0.437136	0.802849	0.0564855	hypo	0
chr19	10526318	10526652	10	-0.365571	0.24889	0.614461	0.059498	hypo	0
chr10	65280165	65280618	6	-0.365536	0.340676	0.706212	0.0621519	hypo	0
chr12	12164740	12165279	13	-0.365462	0.25553	0.620992	0.0598925	hypo	0
chr5	110088909	110089198	3	-0.365459	0.486684	0.852142	0.0548304	hypo	0
chr3	3169515	3169663	8	-0.3654	0.252029	0.617429	0.058576	hypo	0
chr13	49104120	49104331	7	-0.365136	0.516515	0.881652	0.059746	hypo	0
chr19	13055476	13055608	3	-0.365082	0.490194	0.855276	0.0616074	hypo	0
chr8	107757679	107758186	6	-0.365068	0.36458	0.729648	0.0589793	hypo	0
chr12	29532872	29533034	3	-0.364905	0.298034	0.662939	0.0560378	hypo	0
chr19	45274828	45274923	4	-0.364823	0.50215	0.866972	0.056983	hypo	0
chr6	11343217	11343618	9	-0.364603	0.473928	0.838531	0.0529034	hypo	0
chr10	13627925	13628189	4	-0.364541	0.410815	0.775356	0.0557672	hypo	0
chr18	2927070	2927365	4	-0.364436	0.521038	0.885474	0.0594575	hypo	0
chr17	43228100	43228370	5	-0.364325	0.316978	0.681304	0.0598217	hypo	0
chr3	99822766	99822837	3	-0.364276	0.388967	0.753243	0.0591216	hypo	0
chr11	108094765	108095295	7	-0.36425	0.120572	0.484821	0.0622426	hypo	0
chr12	4221811	4222020	3	-0.364184	0.475861	0.840045	0.0591226	hypo	0
chr8	67835853	67835902	5	-0.364107	0.351725	0.715833	0.0589827	hypo	0
chr12	125260091	125260266	3	-0.363743	0.188919	0.552662	0.0562148	hypo	0
chr2	25640859	25641307	7	-0.363735	0.309059	0.672794	0.0547345	hypo	0
chr15	66789236	66789307	5	-0.363705	0.433266	0.796971	0.0604293	hypo	0
chr12	51373082	51373375	4	-0.363665	0.497865	0.861531	0.0522074	hypo	0
chr19	38859451	38860152	11	-0.363564	0.489756	0.85332	0.0560053	hypo	0
chr1	11132534	11133379	20	-0.363293	0.377399	0.740692	0.0529107	hypo	0
chr6	97344671	97344798	4	-0.363288	0.346471	0.709759	0.0563779	hypo	0
chr16	4853550	4853574	3	-0.363242	0.338682	0.701924	0.0579802	hypo	0
chr3	99823186	99823535	3	-0.363233	0.366217	0.72945	0.0591216	hypo	0
chr16	50094434	50094642	4	-0.362767	0.474121	0.836888	0.0583521	hypo	0
chr9	108298554	108299828	9	-0.362625	0.387037	0.749663	0.0559074	hypo	0
chr10	1096284	1096693	6	-0.362588	0.377611	0.740199	0.0557998	hypo	0
chr15	52756360	52758404	17	-0.362245	0.333277	0.695522	0.0545196	hypo	0
chr1	229760367	229760673	6	-0.361939	0.342412	0.704351	0.0606617	hypo	0
chr7	74063828	74063959	4	-0.36192	0.305015	0.666935	0.0591114	hypo	0
chr18	55316863	55317194	5	-0.361824	0.33804	0.699863	0.0530149	hypo	0
chr17	78630582	78630834	8	-0.361776	0.529618	0.891394	0.0607248	hypo	0
chr15	60941689	60941768	3	-0.361733	0.418033	0.779766	0.0584375	hypo	0
chr16	71809923	71810199	4	-0.361631	0.32054	0.682171	0.0584069	hypo	0
chr12	110968519	110969288	9	-0.361573	0.352015	0.713588	0.0589271	hypo	0
chr10	112147745	112148031	4	-0.361572	0.456167	0.817739	0.0539768	hypo	0
chr8	101475931	101476165	7	-0.361505	0.291896	0.653401	0.0615998	hypo	0
chr12	105750775	105751086	4	-0.361432	0.280671	0.642104	0.062446	hypo	0
chr1	28445201	28445526	4	-0.361424	0.476524	0.837948	0.0535538	hypo	0
chr3	129398022	129398438	13	-0.361091	0.536095	0.897186	0.0589627	hypo	0
chr1	27166119	27166356	4	-0.361044	0.362584	0.723628	0.0652706	hypo	0
chr3	49142946	49143004	5	-0.360959	0.558467	0.919426	0.0666152	hypo	0
chr1	178513647	178514091	11	-0.360891	0.454923	0.815814	0.0608157	hypo	0
chr22	30334200	30334913	10	-0.360886	0.321809	0.682695	0.0609735	hypo	0
chr14	64968661	64969121	9	-0.360774	0.177751	0.538525	0.0620005	hypo	0
chr12	22695829	22696151	5	-0.360594	0.409471	0.770065	0.0590126	hypo	0
chr13	34253392	34253771	9	-0.360205	0.159587	0.519792	0.0598589	hypo	0
chr3	42057453	42057507	3	-0.360129	0.371537	0.731665	0.0618761	hypo	0
chr19	3108516	3108582	4	-0.360078	0.365983	0.726061	0.0613353	hypo	0
chr22	43230259	43230699	5	-0.360019	0.360457	0.720476	0.0599696	hypo	0
chr16	12071747	12071858	4	-0.359642	0.281158	0.6408	0.0584646	hypo	0
chr8	38860349	38860544	6	-0.359428	0.416354	0.775782	0.0622251	hypo	0
chr6	36649561	36649622	5	-0.359394	0.271596	0.63099	0.0663511	hypo	0
chr12	123270153	123270291	4	-0.359339	0.467742	0.827082	0.0546347	hypo	0
chr6	153306264	153306827	15	-0.359262	0.411173	0.770435	0.0523465	hypo	0
chr18	57543680	57543851	3	-0.358941	0.396678	0.755619	0.0577048	hypo	0
chr15	42797402	42797554	5	-0.358919	0.216922	0.575841	0.063408	hypo	0
chr11	47239615	47240556	11	-0.358772	0.467653	0.826425	0.0558191	hypo	0
chr5	55360676	55361019	6	-0.358676	0.486932	0.845607	0.0532007	hypo	0
chr1	6085379	6085633	3	-0.35865	0.350449	0.7091	0.0584214	hypo	0
chr3	169976071	169976442	8	-0.358547	0.475465	0.834012	0.0520422	hypo	0
chr11	93471889	93472598	9	-0.35842	0.122701	0.481121	0.0601665	hypo	0
chr1	70877963	70878026	3	-0.358377	0.310124	0.668501	0.062118	hypo	0
chr19	5975213	5975294	3	-0.35812	0.411656	0.769776	0.0654627	hypo	0
chr3	48593730	48593823	3	-0.358078	0.222694	0.580771	0.0525259	hypo	0
chr2	24625538	24625714	7	0.357904	0.79206	0.434155	0.0553851	hyper	0
chr1	76253905	76254156	4	-0.357838	0.0956128	0.453451	0.0560318	hypo	0
chr5	143550910	143551216	3	-0.357661	0.398593	0.756254	0.0586736	hypo	0
chr15	66587360	66587844	5	-0.357352	0.257775	0.615127	0.0559708	hypo	0
chr6	107076199	107076305	5	-0.357318	0.342213	0.699531	0.0560835	hypo	0
chr16	9179053	9179232	6	-0.357315	0.469508	0.826823	0.0569469	hypo	0
chr2	144488017	144488278	3	-0.357302	0.454777	0.812079	0.0595383	hypo	0
chr6	107364257	107364362	5	-0.357288	0.451524	0.808812	0.0575661	hypo	0
chr6	167242995	167244844	24	-0.35727	0.410083	0.767353	0.0525503	hypo	0
chr3	23922989	23923253	5	0.357229	0.609907	0.252678	0.0556116	hyper	0
chr16	3161965	3162078	3	-0.357046	0.363571	0.720617	0.054815	hypo	0
chr19	16307883	16307957	4	-0.35699	0.52732	0.884309	0.056298	hypo	0
chr11	61108952	61108973	3	-0.356961	0.514402	0.871362	0.0579879	hypo	0
chr2	96990031	96990195	5	-0.356747	0.3136	0.670348	0.0550602	hypo	0
chr2	23602179	23603013	9	-0.356607	0.341658	0.698265	0.0541077	hypo	0
chr19	1002549	1002731	3	-0.356525	0.471877	0.828402	0.0668613	hypo	0
chr22	44419165	44419259	6	-0.356343	0.509977	0.866321	0.0586849	hypo	0
chr1	203295421	203295702	3	-0.355969	0.364478	0.720447	0.0645646	hypo	0
chr12	120570357	120570472	5	-0.355862	0.34673	0.702592	0.0644721	hypo	0
chr20	35232953	35233144	6	-0.355619	0.265025	0.620645	0.0592984	hypo	0
chr2	46095348	46096179	8	-0.355599	0.255187	0.610785	0.0568474	hypo	0
chr12	49111395	49111440	3	-0.3551	0.159074	0.514174	0.0544926	hypo	0
chr5	110087806	110088571	10	-0.354962	0.50597	0.860932	0.0548304	hypo	0
chr7	26197227	26197484	4	-0.3548	0.492864	0.847663	0.0553029	hypo	0
chr14	105491715	105491974	6	-0.354776	0.457513	0.812289	0.0560058	hypo	0
chr12	102252648	102252732	3	-0.354769	0.460895	0.815664	0.0574718	hypo	0
chr11	118956580	118956760	3	-0.354676	0.34602	0.700696	0.0553965	hypo	0
chr12	12735105	12735508	5	-0.354371	0.38423	0.738601	0.0523754	hypo	0
chr1	23440897	23441717	9	-0.354302	0.436644	0.790946	0.0554914	hypo	0
chr16	67064565	67064788	9	-0.354173	0.25931	0.613483	0.0561306	hypo	0
chr17	1799798	1799926	3	-0.354144	0.559504	0.913648	0.0541998	hypo	0
chr13	30970823	30970886	3	-0.354	0.360063	0.714063	0.0589024	hypo	0
chr2	28475998	28476141	4	-0.353995	0.517431	0.871425	0.0520808	hypo	0
chr10	124914875	124915082	5	-0.353964	0.213681	0.567645	0.0540166	hypo	0
chr20	45194258	45194437	4	-0.353842	0.547244	0.901087	0.0550868	hypo	0
chr16	73050688	73050986	5	-0.353812	0.33995	0.693762	0.0560913	hypo	0
chr1	55351703	55351946	4	-0.353676	0.366013	0.719689	0.0610142	hypo	0
chr22	41871978	41872342	6	-0.353611	0.310747	0.664357	0.067307	hypo	0
chr10	99096377	99096538	4	-0.353521	0.525686	0.879207	0.0565084	hypo	0
chr2	113394273	113394358	4	-0.353253	0.462661	0.815914	0.0541996	hypo	0
chr8	41481027	41481158	3	-0.353026	0.246123	0.599149	0.0628101	hypo	0
chr3	177079534	177079580	3	-0.352885	0.336782	0.689667	0.0588024	hypo	0
chr10	35474772	35475237	5	-0.35283	0.497266	0.850097	0.0555966	hypo	0
chr6	108617120	108617208	3	-0.352674	0.477371	0.830045	0.0610502	hypo	0
chr13	28539722	28540143	8	-0.352642	0.320427	0.673069	0.0600678	hypo	0
chr1	9688493	9688613	6	-0.352356	0.0725429	0.424899	0.0626375	hypo	0
chr18	67564979	67565381	9	-0.352323	0.279347	0.63167	0.0529554	hypo	0
chr6	158182413	158183183	18	-0.352316	0.136905	0.489221	0.0641228	hypo	0
chr1	235257667	235257742	3	-0.352047	0.412245	0.764292	0.0579512	hypo	0
chr3	159728425	159728734	4	-0.351927	0.378071	0.729998	0.0575625	hypo	0
chr21	34611147	34611595	8	-0.35186	0.150661	0.502521	0.0673155	hypo	0
chr16	23567653	23567887	8	-0.351823	0.57445	0.926273	0.0689178	hypo	0
chr1	154913567	154913744	5	-0.351377	0.22948	0.580857	0.0585113	hypo	0
chr11	613978	614159	3	-0.351209	0.508433	0.859642	0.0585119	hypo	0
chr2	139263092	139263229	3	-0.351159	0.304534	0.655693	0.0570804	hypo	0
chr7	105161518	105161621	3	-0.35115	0.443137	0.794287	0.0560268	hypo	0
chr20	10650937	10651506	10	-0.350828	0.159068	0.509896	0.0572718	hypo	0
chr18	21018449	21018634	4	-0.350742	0.419671	0.770413	0.0555428	hypo	0
chr20	35936778	35937468	9	-0.350707	0.42164	0.772347	0.0576593	hypo	0
chr5	93953033	93953196	3	-0.35069	0.42838	0.77907	0.0546552	hypo	0
chr10	1039253	1039347	5	-0.350662	0.568329	0.918991	0.0596631	hypo	0
chr15	42262252	42262652	3	-0.350644	0.35993	0.710574	0.0571107	hypo	0
chr5	179249086	179249469	4	-0.350578	0.40068	0.751259	0.0544509	hypo	0
chr10	129922889	129923388	4	-0.350442	0.242736	0.593178	0.0556968	hypo	0
chr9	71791409	71791993	9	-0.350385	0.501014	0.851399	0.0580826	hypo	0
chr18	60848282	60848377	3	-0.350365	0.260401	0.610767	0.0587814	hypo	0
chr7	563115	563296	4	-0.350248	0.348228	0.698476	0.0641489	hypo	0
chr12	95265804	95266056	5	-0.350173	0.517265	0.867438	0.0547158	hypo	0
chr17	7748605	7748708	3	-0.350133	0.353758	0.703891	0.0629951	hypo	0
chr14	103413164	103413280	8	-0.350118	0.413266	0.763385	0.0615901	hypo	0
chr2	69609056	69609238	4	-0.34988	0.558413	0.908293	0.0533873	hypo	0
chr6	149950158	149950581	4	-0.349864	0.293412	0.643276	0.0568182	hypo	0
chr17	47273235	47273695	6	-0.349577	0.57478	0.924357	0.0557425	hypo	0
chr3	179066689	179067057	3	-0.349301	0.34854	0.697841	0.0542411	hypo	0
chr2	198362489	198362799	4	-0.349297	0.357638	0.706936	0.0552164	hypo	0
chr1	1266235	1266684	13	-0.349183	0.401581	0.750764	0.0582183	hypo	0
chr7	20280090	20280507	6	-0.349095	0.347576	0.696671	0.0531245	hypo	0
chr1	154412839	154413408	7	-0.349077	0.397318	0.746395	0.0551093	hypo	0
chr7	134332598	134332706	6	-0.34882	0.152226	0.501045	0.0596386	hypo	0
chr7	134897048	134897101	3	-0.348735	0.372609	0.721344	0.0597734	hypo	0
chr5	172463846	172463932	3	-0.348667	0.379844	0.728511	0.0650232	hypo	0
chr11	66099059	66099166	3	-0.348469	0.50713	0.855599	0.0640278	hypo	0
chr4	151907830	151908110	4	-0.348414	0.373061	0.721475	0.0571494	hypo	0
chr12	28344616	28344818	4	-0.348414	0.493792	0.842206	0.0589626	hypo	0
chr10	135201708	135202028	5	-0.348211	0.297514	0.645725	0.0646423	hypo	0
chr4	40658129	40659200	17	-0.348201	0.146142	0.494344	0.0568218	hypo	0
chr1	154412247	154412523	5	-0.348166	0.366394	0.71456	0.0546473	hypo	0
chr8	681894	682030	3	-0.347734	0.403121	0.750855	0.0579082	hypo	0
chr2	172013231	172013417	4	-0.347721	0.584205	0.931927	0.0553503	hypo	0
chr7	134333138	134333492	7	-0.347444	0.445041	0.792486	0.0596386	hypo	0
chr14	64138652	64138926	4	-0.347433	0.516711	0.864144	0.0534711	hypo	0
chr16	84144125	84145281	16	-0.34723	0.498845	0.846075	0.0557472	hypo	0
chr12	19610324	19610710	4	-0.346883	0.549653	0.896536	0.057586	hypo	0
chr7	3123907	3124236	4	-0.346565	0.609321	0.955886	0.0562264	hypo	0
chr6	36648644	36648907	5	0.346563	0.565756	0.219192	0.0652316	hyper	0
chr8	131143896	131144507	8	-0.346507	0.474022	0.820529	0.0573934	hypo	0
chr1	29508990	29509216	10	0.346377	0.704303	0.357926	0.0662515	hyper	0
chr6	26160318	26160655	4	-0.346316	0.232875	0.579191	0.0564624	hypo	0
chr2	48544323	48544480	4	-0.345879	0.434725	0.780604	0.0534324	hypo	0
chr15	45006400	45007015	7	-0.345764	0.0735024	0.419267	0.0531102	hypo	0
chr17	40738872	40738990	4	-0.345734	0.488714	0.834448	0.0605505	hypo	0
chr3	169974362	169974558	4	-0.34568	0.544861	0.890541	0.0527737	hypo	0
chr7	158405713	158406140	8	-0.345604	0.511574	0.857178	0.0560643	hypo	0
chr6	26270608	26270661	3	-0.345425	0.0329658	0.378391	0.0554002	hypo	0
chr22	32047658	32048288	9	-0.345381	0.367848	0.713229	0.057663	hypo	0
chr19	3149726	3149846	5	-0.345293	0.545674	0.890967	0.0616956	hypo	0
chr9	139382437	139382487	3	-0.345181	0.488616	0.833797	0.0640461	hypo	0
chr17	73780067	73780263	6	-0.345158	0.508923	0.854081	0.0591707	hypo	0
chr19	55774926	55775438	11	-0.34515	0.515788	0.860938	0.0612041	hypo	0
chr10	35474116	35474327	9	-0.344854	0.454033	0.798886	0.0555966	hypo	0
chr12	123013311	123013685	13	-0.344837	0.412094	0.756932	0.0556541	hypo	0
chr18	13502064	13502464	7	-0.344837	0.433765	0.778602	0.0580671	hypo	0
chr18	51789898	51790227	5	-0.34471	0.31133	0.65604	0.057398	hypo	0
chr15	45007336	45007515	3	-0.344639	0.232423	0.577063	0.0531102	hypo	0
chr10	864116	864569	4	-0.344631	0.342773	0.687404	0.0612446	hypo	0
chr3	187487526	187487992	4	0.344619	0.577073	0.232454	0.0591188	hyper	0
chr5	110089559	110089819	5	-0.344563	0.503804	0.848367	0.0548304	hypo	0
chr17	40581690	40581886	3	-0.34436	0.495872	0.840233	0.0557291	hypo	0
chr6	26170015	26170115	3	-0.344257	0.329757	0.674015	0.0582193	hypo	0
chr3	56715138	56715348	3	-0.344207	0.579998	0.924205	0.0560295	hypo	0
chr7	17977935	17978049	3	-0.344192	0.409158	0.75335	0.0620784	hypo	0
chr11	75773873	75774197	8	-0.344087	0.534752	0.87884	0.0615367	hypo	0
chr15	67533697	67533977	4	-0.34404	0.411078	0.755118	0.0542661	hypo	0
chr19	36584077	36584221	5	-0.343988	0.554796	0.898784	0.0655821	hypo	0
chr9	3522556	3523132	5	-0.343959	0.572374	0.916333	0.0532734	hypo	0
chr4	185316381	185316491	5	-0.343743	0.310964	0.654706	0.0670302	hypo	0
chr12	12760014	12760377	7	-0.343741	0.492359	0.8361	0.0586812	hypo	0
chr19	11549352	11549373	3	-0.343729	0.357409	0.701138	0.0672849	hypo	0
chr2	201731709	201732200	12	0.343675	0.505956	0.162282	0.0657726	hyper	0
chr5	114936711	114937065	4	-0.343516	0.33784	0.681357	0.0601705	hypo	0
chr19	47356408	47356795	5	-0.343507	0.583978	0.927485	0.0619501	hypo	0
chr3	136472342	136472652	5	-0.343435	0.453055	0.79649	0.0552513	hypo	0
chr1	53393752	53393931	10	0.34331	0.644398	0.301088	0.0586749	hyper	0
chr16	3077950	3077996	3	-0.343224	0.446655	0.78988	0.0631986	hypo	0
chr5	172333319	172333867	13	-0.34318	0.430993	0.774173	0.0598354	hypo	0
chr12	776221	776351	4	-0.343088	0.270774	0.613862	0.0536556	hypo	0
chr14	91876206	91876815	9	-0.342843	0.417583	0.760426	0.0540414	hypo	0
chr15	67833174	67833416	5	-0.34259	0.238207	0.580797	0.0540262	hypo	0
chr2	25824577	25824931	9	-0.342395	0.547493	0.889887	0.0525415	hypo	0
chr9	108298042	108298182	3	-0.342176	0.385673	0.727849	0.0559074	hypo	0
chr10	18947162	18947501	9	-0.342044	0.2217	0.563744	0.0552563	hypo	0
chr19	55898727	55898848	4	-0.341811	0.36183	0.70364	0.0622808	hypo	0
chr15	91099440	91100057	8	-0.341795	0.281537	0.623332	0.0577451	hypo	0
chr1	51437578	51438156	6	-0.341776	0.464713	0.806488	0.0587113	hypo	0
chr2	85147347	85147831	5	-0.341674	0.236093	0.577767	0.0571378	hypo	0
chr11	995795	995836	3	-0.341329	0.331224	0.672553	0.0670577	hypo	0
chr14	23003637	23004483	8	-0.341238	0.388414	0.729652	0.0555517	hypo	0
chr18	56638660	56638910	5	-0.341	0.38704	0.72804	0.0558523	hypo	0
chr12	102252153	102252211	3	-0.340985	0.398308	0.739292	0.0574635	hypo	0
chr1	25095858	25096264	3	-0.340976	0.309555	0.650531	0.0589543	hypo	0
chr1	1760037	1760251	5	-0.340957	0.337083	0.67804	0.0598437	hypo	0
chr17	47272458	47272718	8	-0.340936	0.570014	0.91095	0.0557425	hypo	0
chr17	20687446	20687632	8	0.340733	0.585903	0.24517	0.0651858	hyper	0
chr15	59662289	59662309	3	-0.340674	0.423165	0.76384	0.0589793	hypo	0
chr6	31627511	31627678	7	-0.340574	0.234283	0.574858	0.057195	hypo	0
chr3	122281975	122282200	3	-0.340526	0.299243	0.639769	0.0570773	hypo	0
chr14	21921398	21921737	4	-0.340466	0.551468	0.891935	0.0585349	hypo	0
chr1	174755993	174756306	5	-0.34042	0.424897	0.765318	0.0563691	hypo	0
chr2	10441546	10441905	5	-0.340391	0.442925	0.783316	0.0628742	hypo	0
chr5	79544077	79544412	6	-0.340251	0.529925	0.870175	0.0591197	hypo	0
chr16	71887220	71888006	8	-0.340225	0.428574	0.768799	0.0553705	hypo	0
chr4	87926274	87926410	3	-0.340146	0.531652	0.871799	0.0548577	hypo	0
chr4	47840396	47840733	6	-0.339897	0.472684	0.812582	0.0591088	hypo	0
chr9	131783233	131783433	5	-0.339825	0.398073	0.737898	0.0593273	hypo	0
chr6	135651396	135651928	10	-0.339661	0.441062	0.780723	0.0558078	hypo	0
chr18	21719626	21719802	8	0.33966	0.767496	0.427835	0.0619589	hyper	0
chr15	74693842	74694193	5	-0.339659	0.114476	0.454135	0.0559507	hypo	0
chr11	93471417	93471585	4	-0.339389	0.166284	0.505673	0.0601665	hypo	0
chr16	30778884	30779235	6	-0.339282	0.49027	0.829551	0.0609926	hypo	0
chr15	41721390	41721957	8	-0.338796	0.515984	0.85478	0.054481	hypo	0
chr15	64913474	64914214	10	-0.338736	0.421475	0.760211	0.0570916	hypo	0
chr15	40986118	40986227	4	-0.338527	0.325048	0.663574	0.052267	hypo	0
chr10	5946197	5946652	5	-0.338462	0.38279	0.721252	0.0561844	hypo	0
chr8	98723696	98724512	9	-0.338375	0.462826	0.801201	0.0587601	hypo	0
chr5	154162943	154163593	9	-0.338363	0.516412	0.854775	0.0565473	hypo	0
chr21	44298340	44298399	3	-0.338053	0.305435	0.643488	0.0553249	hypo	0
chr8	103877992	103878181	4	-0.337967	0.391283	0.72925	0.0607697	hypo	0
chr1	220259532	220259667	5	-0.337932	0.338506	0.676438	0.067883	hypo	0
chr2	101883674	101884645	15	-0.337919	0.510943	0.848862	0.0535141	hypo	0
chr21	33102325	33102593	4	-0.337898	0.371079	0.708977	0.0559607	hypo	0
chr1	39504129	39504378	4	-0.33785	0.472512	0.810362	0.0618842	hypo	0
chr11	8703384	8703537	4	-0.337688	0.24707	0.584758	0.0555112	hypo	0
chr17	16117366	16117572	4	-0.337644	0.246605	0.584249	0.0586769	hypo	0
chr7	100125439	100125635	4	-0.337639	0.339512	0.677151	0.0597644	hypo	0
chr10	135214284	135214588	7	-0.337638	0.424905	0.762543	0.0538103	hypo	0
chr22	28291534	28291958	5	-0.337633	0.489752	0.827385	0.0570548	hypo	0
chr17	38477444	38477532	4	-0.337555	0.408006	0.74556	0.0570153	hypo	0
chr12	44208672	44208886	7	-0.337525	0.561052	0.898576	0.0522029	hypo	0
chr2	3606863	3606955	5	-0.337501	0.184156	0.521657	0.0562073	hypo	0
chr1	173989884	173990095	10	-0.337491	0.232517	0.570008	0.0554937	hypo	0
chr5	150458443	150458756	9	-0.33724	0.228798	0.566038	0.0609003	hypo	0
chr7	56118186	56118303	5	-0.337211	0.300968	0.638179	0.0577484	hypo	0
chr9	114817048	114817562	6	-0.337203	0.588548	0.92575	0.0538056	hypo	0
chr4	151907385	151907458	4	-0.337158	0.418414	0.755572	0.0571494	hypo	0
chr2	10249127	10249282	3	-0.337135	0.547786	0.884922	0.0529686	hypo	0
chr17	25623134	25623546	7	-0.33701	0.123565	0.460575	0.062075	hypo	0
chr5	176562761	176562839	3	-0.337002	0.573445	0.910447	0.0557619	hypo	0
chr4	186253454	186253836	7	-0.336805	0.613159	0.949965	0.0521101	hypo	0
chr2	37797586	37798903	13	-0.336679	0.518114	0.854793	0.054404	hypo	0
chr19	6501518	6501688	7	0.336553	0.531792	0.195239	0.0695209	hyper	0
chr7	25987606	25988272	11	-0.336466	0.504737	0.841203	0.0570882	hypo	0
chr7	5601066	5601100	3	-0.336154	0.537698	0.873852	0.0557621	hypo	0
chr2	24147890	24148181	5	-0.336085	0.316097	0.652181	0.0529507	hypo	0
chr19	19772627	19773331	10	-0.336017	0.378294	0.714311	0.0624648	hypo	0
chr6	143248973	143249276	5	-0.335932	0.103738	0.43967	0.0586984	hypo	0
chr11	68819968	68820416	9	-0.335717	0.501126	0.836843	0.0589655	hypo	0
chr16	11276699	11277250	13	0.335709	0.55672	0.221011	0.0714233	hyper	0
chr17	45002010	45002105	3	-0.335597	0.560268	0.895865	0.0560838	hypo	0
chr17	9336182	9337160	11	-0.335479	0.339551	0.67503	0.054209	hypo	0
chr2	172289557	172289633	4	-0.335335	0.177423	0.512758	0.0547196	hypo	0
chr6	144386840	144387112	3	-0.335297	0.514343	0.84964	0.058117	hypo	0
chr9	5511957	5512562	6	-0.335172	0.439227	0.774399	0.054302	hypo	0
chr18	56337389	56337581	4	-0.335075	0.378856	0.71393	0.0557999	hypo	0
chr6	143888662	143888825	8	-0.335034	0.269346	0.604381	0.0548176	hypo	0
chr15	22894275	22894478	5	-0.334718	0.399803	0.734521	0.0548399	hypo	0
chr1	145506531	145506816	6	-0.334712	0.412172	0.746884	0.0561335	hypo	0
chr7	100733044	100733227	4	-0.334616	0.621894	0.956511	0.0552344	hypo	0
chr5	77663542	77663718	5	-0.334318	0.586056	0.920374	0.0550428	hypo	0
chr5	110845328	110845501	3	-0.334265	0.614392	0.948657	0.0549404	hypo	0
chr14	35254787	35255087	3	-0.334085	0.485253	0.819338	0.055078	hypo	0
chr14	35345132	35345351	4	-0.333877	0.320295	0.654173	0.0536382	hypo	0
chr1	36489272	36489334	3	-0.333714	0.521571	0.855285	0.0628314	hypo	0
chr19	10763460	10763509	3	-0.333618	0.435717	0.769335	0.0604709	hypo	0
chr5	176872317	176872673	5	-0.33353	0.272955	0.606485	0.0559872	hypo	0
chr6	146187410	146187829	5	-0.333349	0.282475	0.615823	0.057019	hypo	0
chr10	35437439	35437972	6	-0.333242	0.326624	0.659866	0.0532932	hypo	0
chr20	61268581	61268686	4	-0.33288	0.467839	0.800718	0.0569344	hypo	0
chr14	78175597	78175780	3	-0.332504	0.356607	0.689111	0.0561549	hypo	0
chr1	154583878	154584137	8	0.332489	0.912857	0.580368	0.0708334	hyper	0
chr9	101985545	101985570	3	-0.332421	0.439416	0.771837	0.059736	hypo	0
chr3	38176719	38176779	3	-0.332206	0.536187	0.868393	0.0579845	hypo	0
chr15	68348743	68349074	5	-0.332101	0.344414	0.676515	0.0537088	hypo	0
chr17	644395	644482	4	-0.332056	0.353422	0.685478	0.0595255	hypo	0
chr13	31004029	31004382	4	-0.331969	0.251753	0.583722	0.0529888	hypo	0
chr10	126659340	126659713	10	-0.331797	0.517581	0.849379	0.0543246	hypo	0
chr7	7760810	7761085	4	-0.33157	0.411187	0.742757	0.0550507	hypo	0
chr15	59530080	59530479	7	-0.331319	0.402088	0.733407	0.0540561	hypo	0
chr2	62372534	62372619	3	-0.331273	0.477249	0.808522	0.0575641	hypo	0
chr3	128506499	128506970	8	-0.331215	0.372585	0.7038	0.0537786	hypo	0
chr20	48727966	48728347	8	-0.33119	0.238154	0.569344	0.0575967	hypo	0
chr14	24900596	24900811	4	-0.331045	0.200755	0.531799	0.060916	hypo	0
chr3	37031711	37031901	3	-0.330781	0.258437	0.589218	0.0570539	hypo	0
chr12	109225610	109225957	4	-0.330759	0.524047	0.854806	0.0565051	hypo	0
chr3	39449342	39449544	4	-0.330564	0.297891	0.628456	0.057382	hypo	0
chr1	9141036	9141293	3	-0.330238	0.378031	0.70827	0.0682391	hypo	0
chr20	62611836	62611937	6	-0.330112	0.237894	0.568006	0.0592208	hypo	0
chr6	30595190	30595427	3	-0.330054	0.439286	0.76934	0.0585328	hypo	0
chr1	244570943	244570960	3	-0.329763	0.564612	0.894375	0.0571369	hypo	0
chr8	8714735	8715194	8	-0.329718	0.564441	0.894159	0.0549425	hypo	0
chr19	4719700	4720687	16	0.329685	0.84749	0.517805	0.0598558	hyper	0
chr10	76971576	76971861	7	-0.329662	0.349301	0.678963	0.0565708	hypo	0
chr18	55317532	55317715	6	-0.329307	0.470037	0.799344	0.0529102	hypo	0
chr1	33117860	33118074	3	-0.329158	0.366996	0.696154	0.0538344	hypo	0
chr19	4804531	4804770	8	-0.329007	0.546434	0.87544	0.0624153	hypo	0
chr6	106969696	106969877	10	-0.328722	0.0449907	0.373713	0.0539218	hypo	0
chr9	140023090	140023171	4	-0.328717	0.180354	0.509071	0.061915	hypo	0
chr19	1172927	1172971	3	0.328664	0.74138	0.412716	0.0632415	hyper	0
chr18	74499670	74499848	9	0.328603	0.646723	0.31812	0.112807	hyper	0
chr4	48273111	48273293	5	-0.328567	0.230965	0.559532	0.0541651	hypo	0
chr17	74067534	74067719	7	-0.328495	0.155546	0.48404	0.0585584	hypo	0
chr5	893777	893934	4	-0.328325	0.367931	0.696256	0.0546493	hypo	0
chr2	28475001	28475346	4	-0.328001	0.488734	0.816734	0.0524019	hypo	0
chr7	139357940	139358328	4	-0.327876	0.289136	0.617012	0.0588407	hypo	0
chr2	174854844	174855496	11	-0.327574	0.326648	0.654222	0.0549291	hypo	0
chr2	25149497	25149912	11	0.327559	0.420234	0.0926744	0.0815769	hyper	0
chr2	179314358	179314598	3	-0.327532	0.424216	0.751748	0.0584233	hypo	0
chr12	132911501	132911730	4	-0.327277	0.491946	0.819222	0.0582766	hypo	0
chr3	143693790	143694219	3	-0.327114	0.197311	0.524424	0.0541276	hypo	0
chr12	124979200	124979265	5	-0.327072	0.245103	0.572175	0.0593051	hypo	0
chr4	77872775	77872981	4	-0.326947	0.350962	0.677909	0.0534183	hypo	0
chr3	141099399	141099569	3	-0.326845	0.386799	0.713644	0.0642974	hypo	0
chr19	34918677	34918737	7	-0.326827	0.364809	0.691635	0.0636737	hypo	0
chr21	38629216	38629325	4	-0.326811	0.506463	0.833274	0.0573677	hypo	0
chr8	77910861	77910978	3	-0.326599	0.42139	0.747989	0.055932	hypo	0
chr2	73830430	73830488	3	-0.326462	0.53442	0.860882	0.0549283	hypo	0
chr5	393007	393075	5	-0.326048	0.254712	0.58076	0.0569487	hypo	0
chr4	39610665	39610741	3	-0.326048	0.382111	0.708159	0.0557275	hypo	0
chr10	114513474	114514274	14	0.325922	0.669847	0.343925	0.0546129	hyper	0
chr1	2190367	2191019	14	-0.325902	0.267985	0.593887	0.0533624	hypo	0
chr10	12397295	12397883	17	0.325705	0.823002	0.497298	0.0639229	hyper	0
chr7	2221183	2221549	11	-0.325487	0.582085	0.907572	0.0565658	hypo	0
chr10	65224416	65224535	4	-0.325374	0.358505	0.683879	0.0535162	hypo	0
chr17	56417359	56417727	4	-0.325319	0.198235	0.523554	0.0558651	hypo	0
chr5	65224590	65224699	3	-0.325246	0.250368	0.575613	0.0568158	hypo	0
chr7	140075742	140076525	8	0.325211	0.690523	0.365313	0.0627113	hyper	0
chr17	2392666	2393783	26	-0.325045	0.470533	0.795578	0.0578485	hypo	0
chr3	23851121	23851254	4	-0.324916	0.194851	0.519767	0.0590446	hypo	0
chr6	31464699	31464955	3	-0.324665	0.149646	0.474311	0.0593385	hypo	0
chr14	31428150	31428463	8	-0.324432	0.556773	0.881205	0.0569976	hypo	0
chr7	139473047	139473305	6	-0.32437	0.556108	0.880478	0.0535144	hypo	0
chr4	170021002	170021653	8	-0.324344	0.401583	0.725927	0.0553953	hypo	0
chr21	15825862	15826550	7	-0.324261	0.400943	0.725204	0.0556555	hypo	0
chr3	127538977	127539201	7	-0.324259	0.43474	0.758999	0.0526002	hypo	0
chr5	162885755	162885827	3	-0.324197	0.375091	0.699288	0.0534389	hypo	0
chr3	196139149	196139739	7	-0.324059	0.420197	0.744256	0.0551948	hypo	0
chr12	27932307	27932335	3	-0.323673	0.348677	0.67235	0.0579578	hypo	0
chr11	65768603	65768662	3	-0.323522	0.420208	0.74373	0.0558663	hypo	0
chr12	9804959	9805089	3	-0.323374	0.425965	0.749339	0.0566269	hypo	0
chr17	66494330	66494857	8	-0.323342	0.21639	0.539732	0.0541998	hypo	0
chr18	56278564	56279391	14	0.323203	0.839094	0.515891	0.0594108	hyper	0
chr22	45650825	45651135	4	-0.32318	0.511	0.83418	0.0572365	hypo	0
chr1	211555332	211555467	3	-0.323108	0.404923	0.728031	0.0538957	hypo	0
chr22	41602903	41603216	4	-0.323106	0.545086	0.868192	0.059322	hypo	0
chr2	32414912	32414959	3	-0.323061	0.358012	0.681073	0.0540776	hypo	0
chr2	54195458	54195974	5	-0.322883	0.466866	0.78975	0.0533036	hypo	0
chr4	3387007	3387383	9	0.322827	0.5219	0.199073	0.0698374	hyper	0
chr22	19464677	19464984	3	-0.322739	0.407862	0.730601	0.0572747	hypo	0
chr7	43823662	43824764	11	-0.322447	0.582667	0.905114	0.0533304	hypo	0
chr6	111660132	111660577	4	-0.322403	0.406777	0.72918	0.0538151	hypo	0
chr7	99642475	99642587	5	0.322388	0.733017	0.410629	0.0706053	hyper	0
chr11	65320980	65321051	3	0.322327	0.559192	0.236865	0.0874995	hyper	0
chr17	62645438	62645607	3	-0.322248	0.536597	0.858845	0.0562944	hypo	0
chr6	21157681	21157865	3	-0.322223	0.627447	0.949669	0.0523465	hypo	0
chr2	32392973	32393299	4	-0.322081	0.59873	0.920811	0.0529608	hypo	0
chr13	111818536	111819433	13	-0.322063	0.392737	0.7148	0.0533876	hypo	0
chr5	67570774	67571235	5	-0.322032	0.473827	0.79586	0.0563424	hypo	0
chr1	218459677	218459842	3	-0.321913	0.509022	0.830935	0.0532143	hypo	0
chr15	80215004	80215207	7	-0.321453	0.374398	0.695851	0.054843	hypo	0
chr4	4441516	4442273	7	-0.321439	0.607824	0.929263	0.0521015	hypo	0
chr15	45671359	45671398	3	-0.321079	0.303039	0.624118	0.0568785	hypo	0
chr17	46814033	46814368	8	-0.320984	0.348514	0.669498	0.0565071	hypo	0
chr3	127841646	127841698	4	-0.320917	0.290357	0.611274	0.0525723	hypo	0
chr17	1737689	1737955	5	-0.320917	0.437005	0.757922	0.0608253	hypo	0
chr2	182239835	182240078	4	-0.320686	0.470605	0.791291	0.0576423	hypo	0
chr19	48190779	48191167	7	-0.32065	0.595204	0.915854	0.056469	hypo	0
chr19	2756886	2757077	9	0.32061	0.643591	0.322982	0.0681288	hyper	0
chr18	46307680	46308136	6	0.320352	0.674543	0.354191	0.0708663	hyper	0
chr7	102936971	102937104	3	-0.320331	0.624111	0.944442	0.0530744	hypo	0
chr6	30703314	30703363	3	-0.320189	0.507946	0.828135	0.0567973	hypo	0
chr5	180686453	180686765	4	-0.319515	0.284214	0.603729	0.0539356	hypo	0
chr11	18477299	18477753	12	0.319052	0.774846	0.455794	0.064644	hyper	0
chr3	196670531	196670603	4	-0.319004	0.445158	0.764162	0.0609222	hypo	0
chr10	105133390	105133465	3	-0.318883	0.498028	0.816911	0.0550444	hypo	0
chr1	184941833	184942013	3	-0.318847	0.388795	0.707642	0.0556437	hypo	0
chr14	50530824	50531177	5	-0.318751	0.468763	0.787514	0.0555514	hypo	0
chr11	14540430	14540583	3	-0.318099	0.434341	0.75244	0.0550308	hypo	0
chr2	58274980	58275058	3	-0.317976	0.194873	0.512849	0.0527694	hypo	0
chr12	122777712	122777957	3	-0.317699	0.598719	0.916418	0.0586122	hypo	0
chr4	170193685	170194058	4	-0.317665	0.242864	0.560529	0.0531127	hypo	0
chr4	103788249	103788762	4	-0.317209	0.550133	0.867342	0.0531571	hypo	0
chr6	139203932	139204085	4	-0.316971	0.567617	0.884589	0.0525473	hypo	0
chr19	6578805	6578878	4	-0.31692	0.403991	0.720911	0.0582135	hypo	0
chr19	12758957	12759137	10	0.316829	0.603516	0.286687	0.0716676	hyper	0
chr12	132479161	132479458	4	-0.316247	0.576967	0.893215	0.0583474	hypo	0
chr3	51976948	51977008	4	-0.316023	0.0997414	0.415765	0.0538153	hypo	0
chr20	37521732	37522456	9	-0.315941	0.051694	0.367635	0.0581794	hypo	0
chr9	19378437	19378762	6	-0.315917	0.240153	0.55607	0.0539014	hypo	0
chr1	31435898	31436078	3	-0.315379	0.542545	0.857923	0.0578273	hypo	0
chr20	2634587	2634697	5	-0.315357	0.228126	0.543483	0.0550178	hypo	0
chr2	32236982	32236997	3	-0.315246	0.576116	0.891363	0.0581988	hypo	0
chr12	93402772	93403090	9	-0.315089	0.613419	0.928508	0.052054	hypo	0
chr13	42849875	42850005	3	-0.314916	0.481272	0.796189	0.0534731	hypo	0
chr20	40091183	40091383	3	-0.314821	0.493748	0.808569	0.0604582	hypo	0
chr14	45429096	45429449	5	-0.314804	0.427367	0.742171	0.053103	hypo	0
chr20	25967716	25967964	13	0.314789	0.411107	0.0963178	0.0813337	hyper	0
chr14	35255491	35255531	3	-0.314748	0.548971	0.863719	0.055078	hypo	0
chr18	74332188	74332745	20	0.314639	0.495361	0.180722	0.0856007	hyper	0
chr4	109542749	109543265	9	-0.314522	0.30141	0.615931	0.0521015	hypo	0
chr19	58286731	58287158	3	-0.314506	0.294615	0.609121	0.0620573	hypo	0
chr14	31427339	31427703	5	-0.31411	0.573614	0.887724	0.0569976	hypo	0
chr16	2265881	2266142	3	-0.314052	0.453037	0.767089	0.058876	hypo	0
chr14	50051338	50051751	7	-0.313872	0.338969	0.652841	0.0550056	hypo	0
chr10	121335021	121335209	5	0.313871	0.906152	0.592281	0.0560517	hyper	0
chr6	88448038	88448216	6	-0.313268	0.607514	0.920782	0.054746	hypo	0
chr15	101602943	101603119	7	-0.313233	0.51525	0.828483	0.0590727	hypo	0
chr6	32086091	32086245	6	-0.313	0.594141	0.907141	0.0545813	hypo	0
chr19	45737940	45738132	13	0.312741	0.694053	0.381311	0.0764959	hyper	0
chr10	63779994	63780686	7	-0.312724	0.368509	0.681233	0.0559986	hypo	0
chr17	41115531	41115759	3	-0.312702	0.388306	0.701008	0.0547206	hypo	0
chr19	46859215	46859725	7	-0.312151	0.56529	0.877441	0.0582305	hypo	0
chr10	92981596	92981769	3	-0.311943	0.280567	0.59251	0.0580533	hypo	0
chr14	23562840	23563154	3	-0.311639	0.44748	0.759119	0.0583859	hypo	0
chr14	55519500	55519677	3	-0.311609	0.411247	0.722857	0.0547821	hypo	0
chr8	42712295	42712456	4	-0.311561	0.598054	0.909615	0.054887	hypo	0
chr11	61196539	61196549	3	-0.311107	0.369025	0.680132	0.0603478	hypo	0
chr7	2249869	2249939	3	-0.311094	0.444307	0.755401	0.05877	hypo	0
chr11	65188295	65188499	5	-0.310704	0.104948	0.415651	0.0551463	hypo	0
chr12	98850816	98851021	8	0.310531	0.340194	0.0296628	0.0661951	hyper	0
chr2	58272914	58273123	3	-0.310238	0.249206	0.559444	0.052245	hypo	0
chr22	38316099	38316324	3	0.310073	0.608236	0.298163	0.0696876	hyper	0
chr14	105499706	105499872	13	0.309368	0.394429	0.0850611	0.0721926	hyper	0
chr21	35831579	35832173	22	0.308847	0.499135	0.190288	0.105289	hyper	0
chr8	144896464	144896538	3	-0.308712	0.419077	0.727788	0.056119	hypo	0
chr3	32857037	32857411	7	-0.308325	0.4011	0.709425	0.0546342	hypo	0
chr8	95452968	95453166	3	-0.308319	0.436548	0.744867	0.0555542	hypo	0
chr14	93196432	93196847	12	-0.308067	0.391567	0.699634	0.0521496	hypo	0
chr19	33137556	33137615	3	-0.307859	0.56435	0.872209	0.0575378	hypo	0
chr17	684440	684687	10	-0.307403	0.499269	0.806673	0.0561757	hypo	0
chr7	1363119	1363360	20	0.307363	0.526837	0.219474	0.0903357	hyper	0
chr3	23922505	23922665	4	0.307303	0.599232	0.291929	0.0556075	hyper	0
chr13	25496007	25496054	3	-0.30715	0.466938	0.774089	0.0543556	hypo	0
chr3	150265479	150265620	5	-0.30685	0.279853	0.586703	0.0528417	hypo	0
chr10	132099326	132099391	6	0.306841	0.508566	0.201725	0.0674383	hyper	0
chr7	50417660	50418320	13	-0.306519	0.216388	0.522907	0.0532369	hypo	0
chr19	39338833	39339028	5	-0.305664	0.338188	0.643852	0.0592465	hypo	0
chr10	120879674	120879753	3	-0.305473	0.368966	0.674439	0.055529	hypo	0
chr2	30371887	30372817	15	-0.305072	0.224511	0.529584	0.0548978	hypo	0
chr3	20226279	20226386	3	-0.304799	0.320237	0.625036	0.0554864	hypo	0
chr17	61820582	61820713	3	-0.304773	0.337535	0.642308	0.0585744	hypo	0
chr2	201829390	201829476	6	-0.304673	0.504895	0.809568	0.0574444	hypo	0
chr12	56635783	56636173	6	-0.304598	0.578673	0.883271	0.0525924	hypo	0
chr7	4787708	4788057	9	-0.304279	0.568268	0.872547	0.0567609	hypo	0
chr15	75338470	75338786	4	-0.304151	0.528168	0.832319	0.0597116	hypo	0
chr2	174855807	174856009	5	-0.303761	0.277315	0.581075	0.0551134	hypo	0
chr19	1130858	1130890	5	-0.303278	0.102008	0.405286	0.0577799	hypo	0
chr10	111643410	111643970	9	-0.302947	0.354517	0.657463	0.0541972	hypo	0
chr2	43614663	43614938	5	-0.302872	0.567673	0.870545	0.0546105	hypo	0
chr7	157405842	157406066	17	0.302772	0.362049	0.0592771	0.097519	hyper	0
chr1	16768826	16769411	10	0.302666	0.811657	0.508991	0.062572	hyper	0
chr20	36007542	36007606	3	0.302174	0.692902	0.390728	0.101121	hyper	0
chr2	242068707	242069193	8	0.302128	0.693397	0.391268	0.0605299	hyper	0
chr9	100850342	100850448	9	0.30157	0.514295	0.212725	0.0701605	hyper	0
chr12	2921122	2921206	3	-0.301515	0.49627	0.797784	0.0553662	hypo	0
chr13	33113463	33113571	4	-0.301446	0.39572	0.697166	0.0546455	hypo	0
chr6	21590048	21590069	3	-0.301412	0.487441	0.788853	0.0543748	hypo	0
chr14	57268683	57269369	7	-0.300894	0.394315	0.695209	0.0567691	hypo	0
chr4	26313816	26314167	9	-0.300778	0.479959	0.780738	0.0566211	hypo	0
chr4	166249900	166250279	5	-0.300764	0.377143	0.677908	0.0535771	hypo	0
chr5	177558732	177558877	3	-0.300698	0.426928	0.727626	0.0572704	hypo	0
chr6	6609552	6609818	4	-0.300675	0.546692	0.847367	0.0566816	hypo	0
chr3	119014825	119014968	4	-0.30034	0.156383	0.456723	0.054811	hypo	0
chr20	20477934	20478194	4	-0.300128	0.49279	0.792918	0.0595827	hypo	0
chr9	4690133	4690432	4	-0.299641	0.476786	0.776427	0.0532734	hypo	0
chr11	68824533	68824557	3	-0.299625	0.466651	0.766276	0.0579137	hypo	0
chr11	108067776	108067819	3	-0.299132	0.510013	0.809145	0.058771	hypo	0
chr14	64117156	64117420	3	-0.298758	0.653204	0.951962	0.0530119	hypo	0
chr17	73149145	73149232	3	-0.298682	0.26873	0.567411	0.0563629	hypo	0
chr8	21998323	21998464	4	0.298671	0.680406	0.381735	0.0661937	hyper	0
chr5	43482959	43483133	3	-0.298528	0.367951	0.666478	0.054616	hypo	0
chr11	47787237	47787279	3	-0.298091	0.367933	0.666024	0.0572504	hypo	0
chr1	16648389	16648798	9	-0.297658	0.515103	0.812761	0.0545337	hypo	0
chr15	91093566	91093913	5	-0.297548	0.259823	0.557371	0.0553507	hypo	0
chr11	66400191	66400342	6	-0.297395	0.546508	0.843902	0.0558766	hypo	0
chr7	101377014	101377275	11	0.297052	0.559996	0.262944	0.0712763	hyper	0
chr19	7693459	7693560	3	-0.296872	0.455655	0.752527	0.0566562	hypo	0
chr1	78472991	78473062	5	-0.296773	0.559482	0.856256	0.0554444	hypo	0
chr5	137743929	137744251	5	-0.296165	0.449871	0.746035	0.0562366	hypo	0
chr1	37500416	37500573	7	0.295606	0.340216	0.0446106	0.0920776	hyper	0
chr17	41833024	41833123	11	0.295423	0.401142	0.10572	0.081651	hyper	0
chr16	88871283	88871518	6	-0.295227	0.379978	0.675205	0.0546419	hypo	0
chr3	14165102	14165342	5	-0.29495	0.399023	0.693973	0.0539185	hypo	0
chr6	35057650	35058175	11	0.294934	0.799352	0.504418	0.0581119	hyper	0
chr4	76862549	76862580	5	-0.294116	0.488723	0.782839	0.0596526	hypo	0
chr11	35642204	35642228	3	0.293702	0.692852	0.39915	0.0614825	hyper	0
chr6	149772392	149772404	3	0.293358	0.542944	0.249586	0.0622258	hyper	0
chr1	151228202	151228285	5	-0.293167	0.473454	0.766621	0.0584882	hypo	0
chr12	123820028	123820272	4	-0.292752	0.584899	0.87765	0.0526001	hypo	0
chr9	130211696	130211791	3	-0.292305	0.422241	0.714546	0.0553659	hypo	0
chr20	30920486	30921016	5	-0.292238	0.167061	0.459299	0.056707	hypo	0
chr3	44804183	44804272	5	-0.291976	0.266725	0.558701	0.0530025	hypo	0
chr12	100660086	100660213	5	0.291901	0.765393	0.473493	0.0546618	hyper	0
chr13	73354931	73355068	6	-0.29173	0.157909	0.449639	0.0528696	hypo	0
chr4	2748662	2748776	3	-0.291721	0.435455	0.727176	0.0591371	hypo	0
chr12	111015458	111015823	3	-0.291459	0.3088	0.600258	0.0579397	hypo	0
chr19	14239225	14239322	4	-0.291397	0.515797	0.807194	0.0585514	hypo	0
chr14	35670352	35670578	3	-0.291185	0.595664	0.886849	0.0544214	hypo	0
chr1	156616781	156616942	14	0.290986	0.520287	0.229301	0.0663268	hyper	0
chr15	101815521	101815980	6	-0.290973	0.627318	0.918291	0.0530234	hypo	0
chr5	138612897	138612918	3	-0.290912	0.513267	0.804179	0.053292	hypo	0
chr10	135237101	135237165	7	0.290828	0.314805	0.0239771	0.0745892	hyper	0
chr3	183968597	183968642	4	-0.29027	0.456743	0.747013	0.0546815	hypo	0
chr7	129823153	129823513	3	-0.290053	0.627417	0.917471	0.0542132	hypo	0
chr19	16773484	16773569	3	-0.289832	0.326887	0.61672	0.0562773	hypo	0
chr17	908783	909207	17	0.289083	0.677076	0.387994	0.0552816	hyper	0
chrX	1324276	1324321	6	0.288537	0.623056	0.334519	0.0754447	hyper	0
chr12	57624405	57624537	3	-0.288298	0.407019	0.695317	0.0577825	hypo	0
chr16	1098624	1098866	6	0.287981	0.444472	0.15649	0.062211	hyper	0
chr17	17126248	17126322	3	0.287466	0.652338	0.364872	0.0599611	hyper	0
chr5	156692395	156692628	3	0.287261	0.672154	0.384892	0.064176	hyper	0
chr4	99273864	99274156	4	0.287177	0.593685	0.306509	0.063391	hyper	0
chr8	144843494	144843541	9	0.286705	0.424816	0.138111	0.0713333	hyper	0
chr1	101492856	101493121	5	-0.285946	0.524382	0.810328	0.0542689	hypo	0
chr17	1693265	1693574	5	-0.285679	0.521507	0.807187	0.0560468	hypo	0
chr4	184424420	184424586	5	-0.285549	0.536626	0.822175	0.0579111	hypo	0
chr1	31768726	31768775	3	-0.285208	0.38573	0.670938	0.0567937	hypo	0
chr2	230648128	230648624	5	-0.285163	0.602821	0.887984	0.0520743	hypo	0
chr14	50267973	50268183	7	-0.284696	0.553631	0.838327	0.0541602	hypo	0
chr14	91927584	91927766	3	-0.284648	0.551482	0.83613	0.0545501	hypo	0
chr13	41836368	41836453	6	-0.28462	0.504408	0.789028	0.0536149	hypo	0
chr2	10260086	10260118	3	-0.284447	0.397865	0.682313	0.0529107	hypo	0
chr12	52643983	52644129	6	0.283245	0.517029	0.233784	0.0642396	hyper	0
chr7	151079808	151079942	5	0.283059	0.579522	0.296462	0.0678443	hyper	0
chr8	97325454	97325622	6	0.283001	0.668943	0.385942	0.0617284	hyper	0
chr3	128787228	128787644	11	0.282766	0.469476	0.18671	0.0606182	hyper	0
chr16	67184152	67184164	3	0.282747	0.473359	0.190612	0.0696964	hyper	0
chr2	88874042	88874535	7	-0.280896	0.610117	0.891013	0.0520604	hypo	0
chr1	67600391	67600963	20	0.280268	0.526218	0.24595	0.0704305	hyper	0
chr7	5629617	5629649	3	0.280058	0.573559	0.293501	0.0691786	hyper	0
chr2	2124506	2125042	29	0.279308	0.553207	0.2739	0.0639321	hyper	0
chr7	100042193	100042580	8	0.279305	0.510909	0.231604	0.0583246	hyper	0
chr4	1237880	1238008	4	0.279226	0.832973	0.553748	0.0565179	hyper	0
chr8	54569673	54569851	15	0.279023	0.434049	0.155026	0.0777719	hyper	0
chr3	47193851	47194174	3	0.27811	0.917708	0.639598	0.0568899	hyper	0
chr20	5066083	5066223	4	0.277287	0.630602	0.353315	0.0676567	hyper	0
chr8	144717339	144717473	4	0.277243	0.766841	0.489597	0.0587704	hyper	0
chr8	143529102	143529249	4	0.277114	0.532574	0.255459	0.0721615	hyper	0
chr3	48964925	48965159	5	-0.277039	0.331997	0.609037	0.0550091	hypo	0
chr18	77455227	77455430	9	0.276985	0.718369	0.441384	0.0532803	hyper	0
chr11	70671622	70671757	5	0.276602	0.579609	0.303008	0.0902577	hyper	0
chr1	40840999	40841047	3	-0.276123	0.123499	0.399622	0.0539814	hypo	0
chr2	242238198	242238450	5	0.275014	0.799036	0.524022	0.0622105	hyper	0
chr15	75341737	75342265	11	0.274749	0.913687	0.638939	0.0539284	hyper	0
chr12	124982608	124983007	10	0.274671	0.51228	0.237609	0.0632185	hyper	0
chr7	55516670	55516791	5	0.274515	0.633683	0.359169	0.0593238	hyper	0
chr7	39649102	39649531	7	0.274455	0.464604	0.190149	0.0599385	hyper	0
chr3	48310078	48310173	3	-0.274077	0.59358	0.867657	0.0555023	hypo	0
chr5	179516797	179517009	9	0.273647	0.691936	0.41829	0.0631043	hyper	0
chr7	75157869	75157926	5	0.273598	0.568981	0.295383	0.0674531	hyper	0
chr2	225467439	225467520	5	0.272838	0.547789	0.274951	0.0595206	hyper	0
chr6	5581667	5581983	8	0.272494	0.669029	0.396535	0.0558884	hyper	0
chr1	51876280	51876601	4	0.271365	0.786371	0.515006	0.0528474	hyper	0
chr17	41994531	41994832	10	0.271249	0.355589	0.0843403	0.0766629	hyper	0
chr1	246382624	246382698	3	0.271099	0.538441	0.267342	0.0634707	hyper	0
chr20	40037757	40037994	7	0.270369	0.676345	0.405976	0.0592093	hyper	0
chr2	54855588	54855850	4	0.270116	0.666151	0.396035	0.0603166	hyper	0
chr14	53019095	53019103	3	0.269855	0.280884	0.0110292	0.0778011	hyper	0
chr18	46261467	46261875	8	0.26948	0.825135	0.555655	0.0645735	hyper	0
chr9	130473530	130473826	8	0.269475	0.632271	0.362796	0.071399	hyper	0
chr13	20989072	20989082	3	0.26935	0.717418	0.448068	0.063777	hyper	0
chr6	43401727	43401973	4	0.269081	0.822241	0.553161	0.0554537	hyper	0
chr10	18738386	18739531	17	0.268821	0.71086	0.442038	0.0637515	hyper	0
chr9	136780200	136780419	6	0.26842	0.650225	0.381805	0.0595933	hyper	0
chr17	6358415	6358706	5	0.268226	0.354295	0.0860684	0.0789624	hyper	0
chr7	138144110	138144380	3	0.268135	0.573774	0.305639	0.0545305	hyper	0
chr15	34782881	34783062	7	0.26758	0.358168	0.0905875	0.0675799	hyper	0
chr9	129244738	129245176	18	0.267166	0.832656	0.56549	0.0798564	hyper	0
chr6	166581157	166581346	11	0.267163	0.301714	0.0345509	0.0863905	hyper	0
chr17	58211577	58211963	6	0.26713	0.577608	0.310478	0.0599969	hyper	0
chr19	59083815	59083855	3	0.266592	0.599746	0.333154	0.0575815	hyper	0
chr1	28156541	28156640	3	-0.26643	0.533325	0.799755	0.0541354	hypo	0
chr5	124242237	124242492	5	0.266336	0.697993	0.431657	0.0660287	hyper	0
chr1	220218664	220218865	8	-0.265401	0.333694	0.599095	0.0530795	hypo	0
chr7	101555421	101555749	8	0.265284	0.757908	0.492623	0.0616195	hyper	0
chr2	227655727	227655769	3	0.264994	0.603023	0.33803	0.0596362	hyper	0
chr2	97536824	97537013	4	0.264748	0.442734	0.177986	0.0584197	hyper	0
chr4	184427933	184428047	4	-0.264558	0.569341	0.833898	0.0528126	hypo	0
chr11	126055812	126056070	7	0.264436	0.806471	0.542034	0.0643927	hyper	0
chr6	32808619	32808752	4	0.262964	0.553733	0.290769	0.0600166	hyper	0
chr3	187488363	187488623	4	0.262957	0.555288	0.292331	0.0592875	hyper	0
chr10	126479583	126479798	4	0.262515	0.577888	0.315373	0.0568183	hyper	0
chr16	30661135	30661409	8	0.262502	0.592805	0.330303	0.0583064	hyper	0
chr16	89114549	89114845	17	0.261443	0.605572	0.344128	0.0713187	hyper	0
chr2	10169358	10170059	19	0.261229	0.389532	0.128303	0.0633106	hyper	0
chr16	923304	923586	6	0.260366	0.558901	0.298536	0.0793757	hyper	0
chr19	8432664	8432775	4	0.260258	0.559734	0.299475	0.0642021	hyper	0
chr8	146023903	146023917	3	0.259942	0.288584	0.0286413	0.0643371	hyper	0
chr17	58156800	58157051	7	0.259799	0.647123	0.387324	0.0551112	hyper	0
chr17	46233551	46233746	9	0.259514	0.549657	0.290143	0.0578912	hyper	0
chr7	101671709	101671892	4	0.259483	0.626849	0.367366	0.0607265	hyper	0
chr7	3073135	3073302	6	0.258557	0.779071	0.520514	0.057445	hyper	0
chr19	50063681	50063943	7	0.258426	0.746228	0.487802	0.056826	hyper	0
chr5	43396416	43396606	3	0.258315	0.540314	0.281999	0.0583041	hyper	0
chr22	38405643	38405780	3	0.257761	0.534442	0.276681	0.0579482	hyper	0
chr17	3791652	3791799	6	0.257712	0.670553	0.412841	0.0746207	hyper	0
chr12	53441808	53441968	3	0.257656	0.684516	0.42686	0.0669098	hyper	0
chr3	49590665	49591478	20	0.257645	0.581858	0.324213	0.0657137	hyper	0
chr17	16939426	16940225	15	0.25758	0.544455	0.286875	0.0629729	hyper	0
chr16	87312379	87312869	8	0.256478	0.525598	0.269121	0.0738333	hyper	0
chr15	49268171	49268448	8	0.256195	0.365428	0.109233	0.0651291	hyper	0
chr16	22202254	22202373	6	0.256058	0.26696	0.0109027	0.0706698	hyper	0
chr6	111271200	111271510	3	0.25587	0.574085	0.318215	0.0570995	hyper	0
chr6	110720501	110721393	35	0.255512	0.711257	0.455744	0.0784412	hyper	0
chr7	105314140	105315091	10	0.255478	0.620377	0.364899	0.0572635	hyper	0
chr5	102089760	102089864	5	0.254826	0.639816	0.384989	0.0615324	hyper	0
chr1	44497352	44497393	3	0.254802	0.621353	0.366551	0.055957	hyper	0
chr12	125312623	125312959	9	-0.254628	0.582309	0.836937	0.052054	hypo	0
chr15	57178687	57178899	5	0.254617	0.611856	0.357239	0.0577126	hyper	0
chr10	11318384	11318591	3	0.254431	0.701086	0.446655	0.055837	hyper	0
chr3	187486418	187486630	3	0.254211	0.670998	0.416787	0.0590098	hyper	0
chr3	128278411	128278803	11	0.253875	0.49526	0.241386	0.0616859	hyper	0
chr13	113407756	113407824	5	0.253469	0.533176	0.279707	0.0572597	hyper	0
chr11	77750885	77751282	6	0.252588	0.639155	0.386566	0.0625137	hyper	0
chr3	128417792	128417935	4	0.251795	0.417694	0.165899	0.0669027	hyper	0
chr17	3493546	3493703	11	0.251565	0.377974	0.126408	0.0619341	hyper	0
chr8	140945582	140945895	11	0.251402	0.518741	0.267339	0.0802205	hyper	0
chr2	148603842	148604230	8	0.250498	0.417887	0.167389	0.0560088	hyper	0
chr21	44528876	44528919	3	0.249999	0.394936	0.144938	0.0548573	hyper	0
chr7	63642446	63642457	3	0.249695	0.544215	0.29452	0.0677204	hyper	0
chr17	27043985	27044213	8	0.249115	0.728309	0.479193	0.0592508	hyper	0
chr17	18265880	18265933	4	0.249107	0.813764	0.564658	0.0604295	hyper	0
chr17	30244019	30244080	6	0.249019	0.639543	0.390523	0.0753124	hyper	0
chr13	21278810	21278949	6	0.248511	0.623086	0.374575	0.0573936	hyper	0
chr5	80490659	80491148	27	0.2474	0.415912	0.168512	0.0701282	hyper	0
chr7	56175257	56175794	6	0.246981	0.658771	0.411791	0.0555161	hyper	0
chr19	6362510	6362664	5	0.24682	0.548135	0.301314	0.065248	hyper	0
chr17	7163889	7164231	8	0.245719	0.578875	0.333156	0.058025	hyper	0
chr9	133587672	133587753	3	0.245644	0.501705	0.256061	0.0547069	hyper	0
chr6	43138055	43138185	7	0.24564	0.492717	0.247077	0.055887	hyper	0
chr15	55727241	55727945	6	0.245432	0.682395	0.436963	0.0611649	hyper	0
chr16	67433267	67433623	12	0.245285	0.544196	0.298911	0.0673566	hyper	0
chr6	134495976	134496043	9	0.244655	0.254171	0.00951651	0.0828895	hyper	0
chr19	3343995	3344206	7	0.244538	0.611038	0.366501	0.0672741	hyper	0
chr1	248100276	248101031	19	0.244529	0.31677	0.0722412	0.0817139	hyper	0
chr7	1603861	1603941	6	0.244432	0.740665	0.496233	0.0649779	hyper	0
chr19	39140191	39140366	4	0.244219	0.460305	0.216086	0.062696	hyper	0
chr14	24838289	24838342	5	0.244006	0.418508	0.174502	0.0694404	hyper	0
chr9	133798270	133798542	6	0.24313	0.7844	0.54127	0.0668215	hyper	0
chr20	44541142	44541248	3	0.242639	0.65332	0.410681	0.0603779	hyper	0
chr2	241772293	241772465	3	0.242611	0.70342	0.460809	0.0565516	hyper	0
chr2	65244718	65245339	14	0.242559	0.527873	0.285314	0.0544243	hyper	0
chr21	43493345	43493731	13	0.242363	0.541128	0.298765	0.0621444	hyper	0
chr20	35286570	35286925	4	0.242109	0.72632	0.48421	0.0551486	hyper	0
chr7	17313985	17314835	8	0.242102	0.635332	0.39323	0.0549052	hyper	0
chr17	48424426	48424657	6	0.241905	0.478309	0.236404	0.0575828	hyper	0
chr10	4229649	4229952	8	0.241673	0.601067	0.359394	0.0627191	hyper	0
chr15	30336522	30337124	8	0.241337	0.75007	0.508733	0.0616146	hyper	0
chr1	29111481	29112285	20	0.241134	0.351921	0.110787	0.0752622	hyper	0
chr7	121078488	121078666	5	0.240988	0.55439	0.313402	0.0611174	hyper	0
chr5	171633978	171634263	3	0.240828	0.647721	0.406893	0.0538491	hyper	0
chr1	154598886	154599157	3	0.240248	0.732794	0.492546	0.0553784	hyper	0
chr19	18888532	18888884	17	0.240125	0.741235	0.50111	0.0619468	hyper	0
chr17	46696867	46696925	4	0.240086	0.316197	0.0761109	0.0613368	hyper	0
chr3	150948710	150948814	3	0.239671	0.474949	0.235279	0.0698679	hyper	0
chr9	15286410	15286689	4	0.239192	0.632903	0.393711	0.055058	hyper	0
chr16	4140235	4140913	14	0.238702	0.442177	0.203475	0.0555889	hyper	0
chr20	30777435	30777598	8	0.238459	0.596647	0.358187	0.0633648	hyper	0
chr2	233740532	233740611	4	0.237392	0.297876	0.0604839	0.0605167	hyper	0
chr8	58192719	58192974	8	0.237284	0.733771	0.496487	0.0703574	hyper	0
chr2	232186450	232186920	15	0.236437	0.405862	0.169426	0.057615	hyper	0
chr6	170532370	170533113	21	0.23618	0.483949	0.247769	0.0674591	hyper	0
chr5	94957269	94957737	8	0.235828	0.41607	0.180241	0.0543206	hyper	0
chr16	87540901	87541264	12	0.235684	0.440916	0.205232	0.0690918	hyper	0
chr1	86042017	86042106	5	0.235493	0.340211	0.104718	0.0588637	hyper	0
chr14	90190788	90190952	5	0.235045	0.529724	0.294678	0.0644674	hyper	0
chr21	34405670	34405937	5	0.234603	0.529955	0.295352	0.0704628	hyper	0
chr19	45193045	45193092	3	0.233746	0.775445	0.541698	0.0665448	hyper	0
chr19	14584830	14584883	5	0.233028	0.37159	0.138562	0.067355	hyper	0
chr9	116385533	116385739	5	0.232798	0.573628	0.340829	0.0640972	hyper	0
chr20	60982717	60982976	3	0.232585	0.663554	0.430969	0.0692066	hyper	0
chr6	13860678	13861196	11	0.231317	0.651454	0.420136	0.0638177	hyper	0
chr1	233749230	233749451	9	0.231264	0.33887	0.107607	0.0670811	hyper	0
chr1	206246850	206247364	10	0.230887	0.670053	0.439166	0.058966	hyper	0
chr1	236958161	236958171	3	0.230807	0.315609	0.084802	0.0584479	hyper	0
chr1	182922034	182922389	11	0.230766	0.392196	0.16143	0.0797681	hyper	0
chr8	8897644	8898013	8	0.230727	0.6704	0.439673	0.0598005	hyper	0
chr5	16556036	16556661	16	0.230536	0.583899	0.353364	0.0690218	hyper	0
chr5	176080580	176080662	4	0.230342	0.565731	0.335389	0.0625349	hyper	0
chr17	53500832	53500923	3	0.230295	0.774384	0.544089	0.0628443	hyper	0
chr10	42862711	42863094	9	0.229796	0.374028	0.144232	0.0985552	hyper	0
chr1	35545686	35545747	3	0.229542	0.560408	0.330867	0.0566284	hyper	0
chr12	132381540	132381937	18	0.229521	0.596582	0.367061	0.0538136	hyper	0
chr22	50528179	50528450	15	0.228824	0.661677	0.432853	0.0628179	hyper	0
chr2	177503499	177503856	13	0.228727	0.483425	0.254698	0.057932	hyper	0
chr21	30396437	30396479	3	0.228697	0.700137	0.47144	0.056502	hyper	0
chr1	51444959	51445246	3	0.228402	0.538665	0.310262	0.0565058	hyper	0
chr5	169011732	169011945	11	0.228394	0.824286	0.595892	0.0560469	hyper	0
chr8	145128997	145129079	3	0.228027	0.630986	0.402959	0.0635361	hyper	0
chr3	107810542	107810678	3	0.227888	0.645531	0.417642	0.0706272	hyper	0
chr4	155547807	155548314	21	0.227402	0.319434	0.0920315	0.0808774	hyper	0
chr8	142183305	142183466	3	0.227298	0.704423	0.477125	0.0630915	hyper	0
chr12	64215522	64215942	13	0.227275	0.509034	0.281759	0.0768917	hyper	0
chr10	105110053	105110152	9	0.227136	0.704695	0.477559	0.0579524	hyper	0
chr2	8977778	8977835	5	0.227125	0.282095	0.0549701	0.0546541	hyper	0
chr7	138402745	138402930	6	0.226969	0.446218	0.21925	0.0618167	hyper	0
chr9	34647483	34647527	3	0.226558	0.29351	0.0669526	0.0624489	hyper	0
chr13	114927203	114927265	6	0.226305	0.369551	0.143246	0.0638134	hyper	0
chr15	100466383	100466486	3	0.226113	0.349571	0.123459	0.0733204	hyper	0
chr10	104687453	104687706	8	0.225974	0.693538	0.467564	0.0610876	hyper	0
chr1	39875541	39875610	4	0.225848	0.610347	0.384498	0.0546897	hyper	0
chr8	144938212	144938881	11	0.225724	0.384731	0.159006	0.0570771	hyper	0
chr1	166889859	166890094	13	0.225435	0.294086	0.0686512	0.0832258	hyper	0
chr19	19368937	19368995	12	0.225181	0.80151	0.57633	0.0778504	hyper	0
chr2	171573295	171573730	7	0.224843	0.311469	0.0866259	0.0652311	hyper	0
chr2	60962983	60963525	12	0.224819	0.324051	0.0992321	0.0738651	hyper	0
chr4	184320529	184320951	17	0.224228	0.683687	0.45946	0.0656649	hyper	0
chr10	27608675	27609069	19	0.2241	0.401767	0.177667	0.068104	hyper	0
chr10	75346583	75347149	10	0.223973	0.734051	0.510078	0.0549369	hyper	0
chr8	146229062	146229127	6	0.223938	0.533711	0.309773	0.0608205	hyper	0
chr12	44198987	44199098	3	0.223447	0.635258	0.411811	0.055064	hyper	0
chr6	36551578	36551649	8	0.223305	0.716842	0.493537	0.0544761	hyper	0
chr12	65514747	65515553	14	0.222944	0.27979	0.0568461	0.0877836	hyper	0
chr12	111053316	111053734	6	0.222806	0.594495	0.371689	0.0607627	hyper	0
chr5	31598883	31599230	3	0.222769	0.817432	0.594664	0.0540186	hyper	0
chr3	172165264	172165708	18	0.222737	0.378914	0.156176	0.0893055	hyper	0
chr2	39187802	39187888	8	0.222704	0.434327	0.211623	0.0568551	hyper	0
chr14	76734058	76734525	12	0.222662	0.424282	0.20162	0.0786339	hyper	0
chr14	69436853	69437386	9	0.222315	0.569951	0.347636	0.0575637	hyper	0
chr3	156543469	156543532	3	0.222291	0.576412	0.354121	0.0599156	hyper	0
chr10	63627179	63627352	5	0.221634	0.6349	0.413265	0.0638917	hyper	0
chr1	232766959	232767194	3	0.220614	0.647198	0.426584	0.0620834	hyper	0
chr1	27004355	27004387	4	0.220523	0.459865	0.239342	0.0624595	hyper	0
chr10	115805676	115805760	4	0.22052	0.459383	0.238863	0.0640152	hyper	0
chr11	68517774	68517864	6	0.219952	0.429756	0.209804	0.071425	hyper	0
chr12	9216898	9217281	18	0.219322	0.276481	0.0571589	0.0986157	hyper	0
chr7	139941774	139942348	4	0.219214	0.627365	0.408151	0.0637042	hyper	0
chr16	31830518	31830791	18	0.218711	0.410716	0.192005	0.0904732	hyper	0
chr6	132700055	132700138	3	0.218681	0.756363	0.537682	0.0557458	hyper	0
chr5	133375176	133375457	13	0.21856	0.533587	0.315027	0.0669521	hyper	0
chr18	46262178	46262249	3	0.218413	0.812511	0.594098	0.064064	hyper	0
chr10	52499888	52500124	4	0.218305	0.244787	0.0264826	0.0661542	hyper	0
chr20	44421481	44421751	4	0.218057	0.467892	0.249835	0.0659992	hyper	0
chr7	73183249	73183576	18	0.217392	0.446308	0.228917	0.0700392	hyper	0
chr12	49552238	49552373	5	0.217042	0.774869	0.557828	0.0572155	hyper	0
chr10	98977103	98977250	3	0.216581	0.480479	0.263898	0.0578396	hyper	0
chr9	115652488	115652982	17	0.216329	0.396726	0.180397	0.073953	hyper	0
chr2	151342444	151342764	16	0.21631	0.247093	0.0307832	0.0735604	hyper	0
chr3	122786895	122786925	3	0.216281	0.495885	0.279604	0.0522296	hyper	0
chr7	6703933	6704194	7	0.215665	0.314392	0.098727	0.0610861	hyper	0
chr15	77819774	77820022	8	0.215444	0.532268	0.316824	0.0709857	hyper	0
chr1	247802555	247803297	38	0.215416	0.536448	0.321032	0.110187	hyper	0
chr7	23287367	23287761	31	0.215283	0.28279	0.067507	0.0857239	hyper	0
chr13	97646120	97646897	23	0.214907	0.262862	0.0479544	0.0923581	hyper	0
chr15	48938766	48938924	5	0.214835	0.772213	0.557378	0.0531961	hyper	0
chr9	103236534	103236614	7	0.214548	0.354989	0.140441	0.0644039	hyper	0
chr19	11354240	11354361	6	0.214538	0.371904	0.157366	0.0605759	hyper	0
chr10	43616355	43616646	4	0.214496	0.390157	0.175661	0.0603883	hyper	0
chr17	40566327	40566710	4	0.214428	0.556944	0.342515	0.0575408	hyper	0
chr9	38487603	38487644	6	0.21431	0.751181	0.536871	0.0644519	hyper	0
chr14	106134570	106134648	5	0.214283	0.494652	0.280369	0.0675228	hyper	0
chr1	234998766	234999052	12	0.214242	0.702588	0.488345	0.0553159	hyper	0
chr18	14748082	14748250	7	0.214067	0.398896	0.184829	0.0658384	hyper	0
chr19	52055528	52055814	3	0.214062	0.425761	0.211699	0.070215	hyper	0
chr3	161088862	161088943	3	0.21379	0.479497	0.265706	0.0600248	hyper	0
chr2	100747482	100747739	3	0.213514	0.522281	0.308767	0.0629015	hyper	0
chr13	111191084	111191309	4	0.213128	0.681988	0.46886	0.0646785	hyper	0
chr2	65612167	65612565	8	0.213042	0.782942	0.5699	0.0613486	hyper	0
chr3	72676479	72676745	4	0.212641	0.664656	0.452015	0.0587681	hyper	0
chr8	145069073	145069248	7	0.212557	0.356641	0.144084	0.0642522	hyper	0
chr16	84875390	84875771	15	0.211937	0.408282	0.196344	0.067981	hyper	0
chr11	66326570	66326669	8	0.211709	0.535703	0.323994	0.0759011	hyper	0
chr15	93652578	93653217	22	0.21169	0.382092	0.170402	0.0695318	hyper	0
chr1	59041625	59041850	9	0.211682	0.470443	0.25876	0.0558964	hyper	0
chr4	3365384	3365775	10	0.211177	0.600268	0.389091	0.0555628	hyper	0
chr8	67664422	67664535	4	0.211071	0.629847	0.418776	0.0616919	hyper	0
chr1	234999387	234999467	5	0.21095	0.756288	0.545338	0.0553882	hyper	0
chr9	137107533	137107945	18	0.210859	0.559891	0.349032	0.0700822	hyper	0
chr19	38396943	38397036	6	0.210849	0.323495	0.112646	0.0576727	hyper	0
chr1	240656063	240656650	24	0.209701	0.539609	0.329908	0.0978967	hyper	0
chr1	109676618	109677325	10	0.209624	0.657734	0.44811	0.0564615	hyper	0
chr14	52311308	52312418	14	0.209562	0.384291	0.17473	0.0523154	hyper	0
chr9	104211406	104211642	15	0.209317	0.398333	0.189016	0.0865737	hyper	0
chr20	57767117	57767174	6	0.209179	0.75766	0.548481	0.0659344	hyper	0
chr12	48336614	48336840	6	0.20917	0.744339	0.535168	0.0570881	hyper	0
chr8	125385387	125385639	9	0.208708	0.279011	0.0703034	0.0612499	hyper	0
chr6	109159251	109159433	9	0.208682	0.523912	0.31523	0.0653079	hyper	0
chr12	213764	214000	19	0.208677	0.534434	0.325757	0.0828072	hyper	0
chr5	139167984	139168029	7	0.208326	0.370154	0.161828	0.0640727	hyper	0
chr20	62129426	62129438	3	0.208002	0.587622	0.37962	0.0693029	hyper	0
chr9	139886152	139886289	6	0.207971	0.608216	0.400244	0.0611048	hyper	0
chr7	101331271	101331580	3	0.20782	0.421372	0.213553	0.0735343	hyper	0
chr3	195583267	195583607	9	0.20763	0.700596	0.492966	0.0571662	hyper	0
chr3	38538611	38538715	3	0.207625	0.79256	0.584934	0.0529189	hyper	0
chr3	47830088	47830176	3	0.207286	0.640681	0.433395	0.0571637	hyper	0
chr17	7894049	7894181	6	0.207249	0.4732	0.26595	0.0679795	hyper	0
chr19	52056455	52056722	9	0.207157	0.537576	0.330419	0.0694343	hyper	0
chr2	237122742	237123040	9	0.207139	0.581284	0.374145	0.0681473	hyper	0
chr5	35617516	35618593	45	0.207043	0.24095	0.0339073	0.0964087	hyper	0
chr2	85956191	85956729	17	0.206912	0.527055	0.320142	0.0586336	hyper	0
chr15	77861848	77862363	15	0.206906	0.45487	0.247965	0.0676897	hyper	0
chr8	101735528	101735630	5	0.20667	0.588016	0.381346	0.0578809	hyper	0
chr1	52083544	52083663	3	0.206648	0.456787	0.250139	0.0552512	hyper	0
chr6	109760888	109761238	8	0.206603	0.536289	0.329686	0.0539417	hyper	0
chr6	44043043	44043192	4	0.2066	0.650931	0.444331	0.0623887	hyper	0
chr14	23981563	23982020	8	0.206416	0.765003	0.558586	0.0568755	hyper	0
chr11	132951861	132951920	4	0.206001	0.451094	0.245093	0.0661674	hyper	0
chr6	143234024	143234279	3	0.205992	0.413696	0.207704	0.065605	hyper	0
chr8	23038390	23038876	5	0.205978	0.437695	0.231716	0.0587435	hyper	0
chr15	65368840	65369137	8	0.205961	0.647273	0.441312	0.0584688	hyper	0
chr7	134670693	134670863	5	0.205393	0.76309	0.557696	0.0584882	hyper	0
chr1	24246318	24246602	7	0.205346	0.425465	0.220119	0.0589679	hyper	0
chr14	74003780	74003820	4	0.20527	0.522453	0.317183	0.0679402	hyper	0
chr12	77404647	77404992	9	0.205092	0.48615	0.281058	0.0557184	hyper	0
chr7	95225504	95225522	3	0.20495	0.263747	0.0587966	0.0743526	hyper	0
chr9	132333082	132333371	6	0.204436	0.79074	0.586305	0.0645146	hyper	0
chr4	77172251	77172588	8	0.204297	0.274289	0.0699916	0.0685259	hyper	0
chr18	3037558	3037629	3	0.204227	0.735359	0.531131	0.0571556	hyper	0
chr9	101946968	101947250	9	0.204168	0.418831	0.214663	0.0674302	hyper	0
chr15	90293081	90293261	5	0.204072	0.364203	0.160131	0.0575929	hyper	0
chr12	108168071	108168752	16	0.203784	0.521042	0.317258	0.0591003	hyper	0
chr4	169753319	169753665	11	0.20337	0.210707	0.00733687	0.0840719	hyper	0
chr1	94704385	94704798	4	0.20326	0.648951	0.445691	0.0588892	hyper	0
chr12	2901611	2902093	11	0.203111	0.554671	0.35156	0.0570619	hyper	0
chr8	146226995	146227022	3	0.202985	0.565572	0.362587	0.0591041	hyper	0
chr11	76777078	76777145	6	0.202901	0.345326	0.142425	0.0823024	hyper	0
chr7	86850688	86850808	3	0.202774	0.727537	0.524763	0.0569744	hyper	0
chr9	104210921	104211079	4	0.202728	0.434347	0.231618	0.0851285	hyper	0
chr12	123427830	123428056	12	0.202457	0.776884	0.574428	0.0593752	hyper	0
chr11	33823942	33824320	12	0.202437	0.448903	0.246465	0.0761225	hyper	0
chr12	117797915	117798391	22	0.202378	0.329555	0.127176	0.0968821	hyper	0
chr3	32860440	32860467	3	0.201781	0.412306	0.210524	0.0527552	hyper	0
chr16	31438863	31439113	17	0.201554	0.465036	0.263482	0.0793743	hyper	0
chr17	20009001	20009419	6	0.201348	0.805338	0.603991	0.0567474	hyper	0
chr10	134957633	134957667	5	0.201137	0.510729	0.309592	0.0839805	hyper	0
chr5	81146672	81146787	3	0.201081	0.58058	0.379498	0.0560743	hyper	0
chr16	71475335	71475392	7	0.200874	0.691827	0.490952	0.0613132	hyper	0
chr10	88125311	88125377	5	0.19997	0.241521	0.0415515	0.0741174	hyper	0
chr3	188015983	188016569	8	0.199643	0.690197	0.490553	0.0709072	hyper	0
chr12	14707507	14707841	5	0.199469	0.597979	0.39851	0.0605597	hyper	0
chr16	68532759	68533402	12	0.199459	0.693556	0.494097	0.056075	hyper	0
chr17	79140589	79140788	6	0.199422	0.70845	0.509028	0.0638223	hyper	0
chr1	116519576	116519947	9	0.199322	0.600103	0.400781	0.0721817	hyper	0
chr1	114695261	114695710	22	0.199241	0.232361	0.0331199	0.0943465	hyper	0
chr12	114029465	114029865	23	0.199181	0.283492	0.0843113	0.0898902	hyper	0
chrX	54523075	54523353	3	0.198929	0.772676	0.573747	0.0794958	hyper	0
chr2	1711759	1711885	5	0.198832	0.4845	0.285668	0.0889748	hyper	0
chr20	58662205	58662521	8	0.1986	0.481407	0.282807	0.0661075	hyper	0
chr9	15135137	15135635	13	0.198563	0.469374	0.270811	0.0692073	hyper	0
chr7	140356547	140356777	3	0.198477	0.760593	0.562116	0.056455	hyper	0
chr16	49888475	49888606	3	0.19805	0.487393	0.289343	0.0618258	hyper	0
chr6	42869049	42869507	7	0.198028	0.278688	0.08066	0.0631577	hyper	0
chr12	52115548	52116013	19	0.197669	0.320687	0.123018	0.0638592	hyper	0
chr6	74024484	74025038	40	0.197661	0.298383	0.100722	0.0588068	hyper	0
chr1	227012696	227012853	4	0.197342	0.506927	0.309585	0.058884	hyper	0
chr3	152939400	152940268	15	0.19732	0.462418	0.265098	0.0550472	hyper	0
chr11	85393922	85394123	10	0.197086	0.430575	0.233489	0.0875398	hyper	0
chr6	21664647	21664825	8	0.196949	0.311528	0.114579	0.0861586	hyper	0
chr1	94056946	94057869	15	0.196565	0.525886	0.329322	0.0680011	hyper	0
chr12	132950460	132950832	8	0.196494	0.608711	0.412217	0.0578554	hyper	0
chr8	140741558	140742127	7	0.196122	0.519749	0.323627	0.0689294	hyper	0
chr6	156609549	156610158	13	0.195543	0.488453	0.292911	0.0591239	hyper	0
chr7	968800	968820	3	0.195413	0.724956	0.529542	0.0621443	hyper	0
chr2	85662285	85662382	5	0.195397	0.600506	0.40511	0.0672385	hyper	0
chr8	37757729	37757750	3	0.195187	0.695044	0.499857	0.0669925	hyper	0
chr1	108023083	108023636	18	0.195133	0.41436	0.219228	0.0629647	hyper	0
chr1	167423737	167423821	4	0.19503	0.782461	0.587431	0.0555537	hyper	0
chr5	65163628	65163945	11	0.194481	0.688579	0.494098	0.0535336	hyper	0
chr2	15282328	15283019	15	0.194473	0.435534	0.241061	0.0619259	hyper	0
chr15	83377549	83377771	8	0.194409	0.609906	0.415497	0.056266	hyper	0
chr1	95393305	95393403	4	0.193861	0.399831	0.20597	0.0611768	hyper	0
chr3	57113627	57113639	3	0.193826	0.290334	0.096508	0.0605668	hyper	0
chr4	169799622	169799727	6	0.193791	0.385697	0.191906	0.0716797	hyper	0
chr3	27674500	27674855	13	0.193625	0.205979	0.0123536	0.0709845	hyper	0
chr21	45254546	45254551	3	0.19346	0.387756	0.194296	0.0634726	hyper	0
chr2	233793729	233793949	12	0.193249	0.646431	0.453182	0.0702765	hyper	0
chr15	62684546	62685053	12	0.193184	0.375494	0.18231	0.0597108	hyper	0
chr7	100841494	100841749	6	0.19314	0.757917	0.564777	0.0674149	hyper	0
chr1	2250525	2250580	4	0.192802	0.505571	0.31277	0.0631953	hyper	0
chr6	40996788	40996842	3	0.192718	0.463165	0.270447	0.0569646	hyper	0
chr5	109026772	109027000	11	0.192585	0.216028	0.0234429	0.078151	hyper	0
chr6	43111292	43111652	8	0.192498	0.474817	0.282319	0.0784563	hyper	0
chr8	141169921	141170206	9	0.192362	0.370634	0.178272	0.0569919	hyper	0
chr10	30347376	30347966	21	0.192226	0.394293	0.202067	0.0757433	hyper	0
chr5	175123370	175123830	9	0.192055	0.45338	0.261325	0.0779585	hyper	0
chr4	7104248	7104589	9	0.191847	0.687555	0.495708	0.0596962	hyper	0
chr13	27751647	27751723	4	0.191478	0.554366	0.362888	0.0549267	hyper	0
chr9	25677322	25677561	10	0.191005	0.346805	0.155801	0.0550828	hyper	0
chr5	151038700	151039338	9	0.190792	0.695736	0.504944	0.0586779	hyper	0
chr5	42944028	42944510	20	0.190667	0.393991	0.203324	0.0572187	hyper	0
chr1	165796253	165796334	4	0.190566	0.318503	0.127937	0.0554194	hyper	0
chr3	50605581	50605924	13	0.190296	0.737238	0.546942	0.0560578	hyper	0
chr10	80166590	80167921	29	0.190213	0.446466	0.256253	0.0794954	hyper	0
chr1	168104979	168105079	5	0.190034	0.328406	0.138372	0.0626395	hyper	0
chr4	40752746	40752972	13	0.189287	0.37723	0.187943	0.0586196	hyper	0
chr6	166510646	166511686	29	0.189279	0.512165	0.322886	0.0820542	hyper	0
chr2	214149526	214149743	4	0.189219	0.443343	0.254124	0.0583592	hyper	0
chr10	99532138	99532174	3	0.189166	0.430327	0.241161	0.0585846	hyper	0
chr11	14403303	14403420	3	0.1891	0.702003	0.512903	0.0609192	hyper	0
chr2	220306036	220306308	18	0.188934	0.327048	0.138113	0.0712628	hyper	0
chr2	96781700	96781838	6	0.188754	0.550061	0.361307	0.0624941	hyper	0
chr1	211689280	211689285	3	0.188679	0.486591	0.297913	0.0602061	hyper	0
chr8	134295339	134295669	7	0.188081	0.483737	0.295655	0.0620057	hyper	0
chr3	193690087	193690460	5	0.188011	0.773517	0.585506	0.0654865	hyper	0
chr9	133884426	133884701	12	0.187884	0.269164	0.0812803	0.0820063	hyper	0
chr9	86886141	86886992	30	0.187836	0.315986	0.12815	0.0689479	hyper	0
chr2	88583534	88584025	23	0.187788	0.565505	0.377717	0.0708869	hyper	0
chr9	137258216	137258396	6	0.187783	0.538983	0.3512	0.0614452	hyper	0
chr12	129453418	129453631	6	0.187676	0.435874	0.248199	0.0584931	hyper	0
chr2	182521222	182521304	6	0.187644	0.311297	0.123653	0.0751721	hyper	0
chr9	139026004	139026244	6	0.187523	0.638837	0.451314	0.0695832	hyper	0
chr14	70014632	70014992	23	0.187258	0.27798	0.0907215	0.0861511	hyper	0
chr7	128482207	128482491	10	0.187249	0.523016	0.335767	0.0613103	hyper	0
chr13	110384182	110384516	16	0.187104	0.443817	0.256714	0.0728482	hyper	0
chr4	1601535	1601586	3	0.187074	0.503977	0.316903	0.0690476	hyper	0
chr6	52858957	52859159	12	0.18701	0.502057	0.315047	0.0606395	hyper	0
chr10	4868796	4868990	6	0.186932	0.255718	0.068786	0.099155	hyper	0
chr7	64350351	64350510	6	0.186842	0.49101	0.304168	0.0610328	hyper	0
chr6	119030542	119030842	7	0.186526	0.334393	0.147867	0.0594483	hyper	0
chr18	8730558	8730893	13	0.18638	0.447967	0.261588	0.0720817	hyper	0
chr9	132124542	132124720	5	0.186068	0.410153	0.224085	0.0549277	hyper	0
chr5	66300900	66301480	10	0.185777	0.278357	0.09258	0.0720777	hyper	0
chr1	230889345	230890175	10	0.185748	0.495102	0.309354	0.0621342	hyper	0
chr3	44559612	44560085	9	0.185712	0.515137	0.329425	0.0639577	hyper	0
chr5	65163086	65163304	5	0.185683	0.613555	0.427872	0.0535336	hyper	0
chr21	42213393	42214149	34	0.185666	0.27734	0.0916741	0.0850184	hyper	0
chr5	32504652	32505493	12	0.185649	0.40927	0.223621	0.0573723	hyper	0
chr20	49252321	49253001	16	0.185562	0.624388	0.438826	0.0596877	hyper	0
chr2	95873657	95873764	5	0.185498	0.353418	0.167919	0.0548353	hyper	0
chr3	138654672	138654730	5	0.184998	0.374379	0.189381	0.0629925	hyper	0
chr17	37183033	37183787	12	0.184859	0.28621	0.101351	0.0701984	hyper	0
chr12	26379824	26380330	34	0.184746	0.287698	0.102952	0.0840275	hyper	0
chr9	137039185	137039506	8	0.184708	0.358423	0.173715	0.0638349	hyper	0
chr16	75551481	75551556	3	0.184568	0.2826	0.0980321	0.0614526	hyper	0
chr11	3238390	3238438	5	0.184337	0.313696	0.129359	0.0651578	hyper	0
chr7	69471280	69471472	5	0.183994	0.463623	0.279629	0.0582582	hyper	0
chr14	103674333	103674599	10	0.183935	0.568375	0.38444	0.0723468	hyper	0
chr7	101397612	101397974	6	0.183895	0.325237	0.141341	0.0554974	hyper	0
chr14	103606636	103607040	5	0.183676	0.46549	0.281814	0.0616282	hyper	0
chr2	220417937	220418017	5	0.183257	0.472875	0.289618	0.0563195	hyper	0
chr7	39454468	39454691	4	0.182972	0.500742	0.31777	0.0682833	hyper	0
chr5	5139442	5139643	5	0.182666	0.601878	0.419212	0.0617016	hyper	0
chr5	180018991	180019061	6	0.182554	0.704865	0.522311	0.0610118	hyper	0
chr5	133802600	133802704	4	0.182538	0.302497	0.119959	0.0632117	hyper	0
chr10	134036445	134036871	9	0.182475	0.444364	0.26189	0.0671546	hyper	0
chr2	113358554	113358772	10	0.182405	0.643223	0.460819	0.060852	hyper	0
chr12	46004822	46005272	17	0.182318	0.556804	0.374485	0.0628958	hyper	0
chr7	63560630	63560643	3	0.182149	0.608569	0.42642	0.0715858	hyper	0
chr17	767567	767795	8	0.182131	0.437957	0.255826	0.0667781	hyper	0
chr2	101618192	101618283	5	0.182102	0.550995	0.368893	0.0546307	hyper	0
chr10	6317117	6317544	12	0.181667	0.668041	0.486374	0.0533237	hyper	0
chr16	31548475	31548688	5	0.18142	0.551275	0.369855	0.0632164	hyper	0
chr17	42635888	42636312	27	0.181345	0.467695	0.286351	0.055242	hyper	0
chr17	4486934	4487125	5	0.180863	0.379133	0.19827	0.0749019	hyper	0
chr16	27185580	27185725	7	0.180862	0.478152	0.29729	0.0597976	hyper	0
chr4	617689	617787	5	0.180738	0.521605	0.340867	0.0661947	hyper	0
chr22	50587574	50587894	11	0.180715	0.38262	0.201904	0.0647232	hyper	0
chr1	23963967	23964314	16	0.180709	0.420358	0.239649	0.0621777	hyper	0
chr19	45720551	45720631	5	0.180488	0.553315	0.372827	0.0636523	hyper	0
chr10	124133286	124133663	13	0.180389	0.314298	0.133909	0.0655092	hyper	0
chr1	156890531	156890880	13	0.180383	0.253146	0.0727633	0.065393	hyper	0
chr22	38396183	38396475	5	0.18024	0.540136	0.359897	0.0613122	hyper	0
chr7	142902622	142903211	14	0.179982	0.397708	0.217727	0.0583549	hyper	0
chr6	35490925	35491354	11	0.17985	0.313425	0.133574	0.0690022	hyper	0
chr18	48633530	48633767	5	0.179584	0.67297	0.493386	0.059166	hyper	0
chr8	145925894	145926379	15	0.179062	0.384017	0.204955	0.0700318	hyper	0
chr2	152803285	152804655	21	0.179052	0.486964	0.307912	0.054658	hyper	0
chr11	71912211	71912227	3	0.179	0.944092	0.765092	0.0542309	hyper	0
chr10	118975861	118976279	19	0.17878	0.295031	0.11625	0.0930326	hyper	0
chr1	78511014	78511210	5	0.178761	0.605994	0.427233	0.069548	hyper	0
chr9	708946	709157	3	0.178629	0.503118	0.324489	0.062305	hyper	0
chr16	79127210	79127570	6	0.178526	0.368656	0.190129	0.0599012	hyper	0
chr16	87715970	87716023	3	0.17842	0.598072	0.419652	0.0585302	hyper	0
chr18	61669768	61670031	13	0.178415	0.670011	0.491597	0.0669007	hyper	0
chr11	70649951	70650640	16	0.178231	0.451924	0.273693	0.0622211	hyper	0
chr12	108732823	108733021	5	0.178166	0.500201	0.322035	0.0529674	hyper	0
chr14	71633872	71633950	3	0.178111	0.678028	0.499917	0.0643276	hyper	0
chr12	113013207	113013571	4	0.178081	0.459181	0.281101	0.0624159	hyper	0
chr17	78086764	78087045	5	0.178045	0.340438	0.162393	0.0604243	hyper	0
chr4	172735068	172735328	9	0.177862	0.296615	0.118754	0.0703401	hyper	0
chr7	6312576	6312721	6	0.177786	0.570582	0.392797	0.0574642	hyper	0
chr19	8808509	8808829	8	0.177754	0.594282	0.416528	0.0678609	hyper	0
chr19	30941108	30941326	7	0.177741	0.440189	0.262448	0.0741561	hyper	0
chr13	92051590	92052600	33	0.17767	0.33949	0.161821	0.0761338	hyper	0
chr2	201172735	201173016	5	0.177635	0.411935	0.234299	0.0548567	hyper	0
chr4	4386726	4386745	3	0.177541	0.586074	0.408533	0.0550242	hyper	0
chr9	81871584	81872637	25	0.177262	0.465693	0.288432	0.0700929	hyper	0
chr11	8831965	8832630	16	0.177251	0.352686	0.175434	0.0637915	hyper	0
chr6	44354411	44354646	3	0.177107	0.65755	0.480443	0.057519	hyper	0
chr8	1321305	1321595	4	0.176979	0.55193	0.374951	0.0895751	hyper	0
chr7	75933521	75933698	3	0.176763	0.686414	0.509651	0.0565467	hyper	0
chr15	85145056	85145158	5	0.176698	0.455508	0.27881	0.0550301	hyper	0
chr12	48335842	48336119	4	0.176688	0.620958	0.44427	0.0567865	hyper	0
chr17	77689978	77690011	3	0.176608	0.447351	0.270744	0.0597058	hyper	0
chr2	60331641	60332482	11	0.176601	0.421778	0.245177	0.0557392	hyper	0
chr8	105379284	105379515	11	0.176595	0.713965	0.537371	0.0625981	hyper	0
chr1	29138162	29138339	7	0.176517	0.697383	0.520866	0.0753518	hyper	0
chr8	973668	973831	5	0.176438	0.5339	0.357462	0.0590707	hyper	0
chr9	34809475	34809735	6	0.176337	0.338964	0.162626	0.0659797	hyper	0
chr14	92413176	92413471	9	0.175653	0.611666	0.436013	0.0608207	hyper	0
chr12	22485922	22486707	19	0.175491	0.408492	0.233	0.0629271	hyper	0
chr17	66755223	66756220	17	0.175487	0.596672	0.421185	0.0543286	hyper	0
chr11	133904459	133904631	3	0.175472	0.465611	0.290139	0.0847621	hyper	0
chr1	152081300	152081637	17	0.175385	0.35567	0.180285	0.0714789	hyper	0
chr12	9393004	9393068	9	0.174893	0.47881	0.303917	0.0648473	hyper	0
chr15	83315991	83316189	14	0.174547	0.311259	0.136712	0.0704497	hyper	0
[truncated: 971 more rows]

## Sheet: Activation
chr	start	end	n	meanDiff	group1.mean	group2.mean	tstat.sd	direction	fwer
chr8	128999989	129000640	10	-0.597584	0.216349	0.813933	0.0509734	hypo	0
chr4	2955977	2956578	11	-0.524208	0.35969	0.883898	0.065051	hypo	1
chr1	227013259	227013670	8	-0.490175	0.299146	0.789321	0.0609201	hypo	2
chr12	49362324	49362676	3	-0.479265	0.430204	0.909469	0.0546681	hypo	6
chr16	11276775	11277564	17	-0.476534	0.235047	0.711581	0.0697809	hypo	2
chr11	519179	519218	4	-0.463129	0.0598123	0.522941	0.0571444	hypo	6
chr4	40230319	40230590	6	-0.45634	0.339002	0.795342	0.0501166	hypo	5
chr12	120108162	120108886	6	-0.449818	0.430724	0.880542	0.0540145	hypo	5
chr19	2608608	2608733	5	-0.44743	0.224891	0.67232	0.0839983	hypo	6
chr17	40441970	40442207	8	-0.443184	0.159518	0.602702	0.0515367	hypo	6
chr2	62293198	62294216	17	-0.43871	0.435591	0.874302	0.0431661	hypo	2
chr6	138190517	138190637	6	-0.433625	0.248396	0.682021	0.049813	hypo	7
chr18	45379027	45379339	3	-0.43146	0.234564	0.666025	0.0810614	hypo	8
chr2	176046632	176046806	3	-0.425564	0.160593	0.586157	0.0523475	hypo	9
chr1	28210661	28211486	18	-0.424975	0.386594	0.811569	0.0555555	hypo	2
chr21	44853326	44853826	12	-0.420654	0.292174	0.712828	0.0541911	hypo	6
chr11	102216585	102217008	9	-0.417194	0.0364895	0.453683	0.0482461	hypo	6
chr8	128999152	128999522	5	-0.417166	0.360991	0.778156	0.0504747	hypo	7
chr2	100747482	100748201	8	-0.41309	0.367278	0.780368	0.0453399	hypo	6
chr15	74686808	74686958	3	-0.411865	0.324668	0.736533	0.070225	hypo	9
chr12	22570515	22570612	3	-0.407099	0.389417	0.796516	0.0557752	hypo	9
chr10	12397295	12398024	21	-0.407091	0.512789	0.91988	0.0506656	hypo	1
chr7	1142932	1143438	17	-0.406467	0.259855	0.666322	0.0661052	hypo	2
chr17	38974681	38974688	3	-0.404783	0.389274	0.794057	0.0536754	hypo	9
chr16	85982333	85983204	22	-0.404585	0.324423	0.729008	0.0541448	hypo	1
chr10	49863598	49863809	9	0.397737	0.829778	0.432041	0.0635699	hyper	9
chr5	426647	426791	3	-0.396077	0.437782	0.833859	0.0538745	hypo	9
chr17	8842790	8843823	17	-0.39426	0.325223	0.719483	0.0596475	hypo	2
chr1	160578001	160578619	9	-0.393163	0.326379	0.719542	0.0417346	hypo	6
chr5	138905239	138905564	7	-0.392737	0.297439	0.690176	0.0480943	hypo	6
chr14	106172318	106172462	4	-0.389763	0.207886	0.597649	0.0691437	hypo	9
chr16	57447997	57448167	6	-0.387017	0.425795	0.812812	0.0636998	hypo	9
chr1	51876280	51876601	4	-0.385879	0.515006	0.900885	0.0438364	hypo	9
chr2	65547315	65547766	9	-0.384745	0.397588	0.782333	0.0554155	hypo	6
chr3	52490481	52490600	4	-0.384512	0.260245	0.644757	0.0586657	hypo	9
chr14	105532545	105532946	6	-0.383405	0.357831	0.741236	0.059894	hypo	9
chr17	38719473	38719944	11	-0.382816	0.282596	0.665412	0.0608848	hypo	6
chr16	11679680	11679918	5	-0.382635	0.244763	0.627398	0.0573247	hypo	9
chr6	43210788	43211040	5	-0.382429	0.307676	0.690105	0.0604166	hypo	9
chr2	242068707	242069288	9	-0.382332	0.399647	0.781978	0.0667635	hypo	6
chr11	117872424	117873801	17	-0.382156	0.373043	0.755198	0.0579113	hypo	2
chr13	91998147	91998689	7	-0.382068	0.150185	0.532253	0.0443031	hypo	8
chr15	80261584	80261788	5	-0.380903	0.164087	0.54499	0.0534034	hypo	9
chr11	61793659	61793882	6	-0.380491	0.453464	0.833955	0.0521825	hypo	9
chr2	106496795	106497294	7	-0.380187	0.540721	0.920907	0.043407	hypo	9
chr19	2562541	2562886	6	-0.377803	0.286427	0.66423	0.0565786	hypo	9
chr21	26768011	26769114	15	-0.377707	0.505787	0.883494	0.0462038	hypo	6
chr10	92753281	92754072	9	-0.377195	0.322571	0.699766	0.050415	hypo	9
chr9	37953665	37954386	15	-0.377044	0.323866	0.70091	0.0673825	hypo	6
chr14	23357087	23357432	7	-0.376517	0.0983748	0.474892	0.0562532	hypo	9
chr6	43111292	43111652	8	-0.37645	0.282319	0.658768	0.0636257	hypo	9
chr19	4719693	4720903	21	-0.375444	0.539299	0.914743	0.0574636	hypo	2
chr19	18873326	18873621	10	-0.37463	0.473559	0.848189	0.0521888	hypo	9
chr14	103230438	103230872	10	-0.373475	0.321084	0.694558	0.0701683	hypo	9
chr8	72460765	72460974	4	-0.373462	0.413617	0.787079	0.052187	hypo	9
chr14	106172855	106172879	3	-0.372906	0.150746	0.523651	0.0680659	hypo	9
chr17	53536127	53536608	9	-0.37271	0.402606	0.775316	0.0478467	hypo	9
chr8	140643638	140643847	4	-0.371646	0.2312	0.602846	0.0576271	hypo	9
chr15	74722405	74723426	14	-0.371027	0.2463	0.617327	0.0640816	hypo	6
chr9	129244925	129244998	7	-0.370961	0.515163	0.886123	0.0654347	hypo	9
chr6	166912784	166913044	5	-0.370737	0.497558	0.868295	0.0436629	hypo	9
chr1	160577115	160577484	4	-0.370564	0.324563	0.695127	0.0417346	hypo	9
chr8	1384323	1384597	6	0.368427	0.777875	0.409448	0.0634481	hyper	9
chr16	70718933	70719012	3	-0.368363	0.421226	0.789589	0.055854	hypo	9
chr6	41864181	41864330	3	-0.367744	0.311339	0.679083	0.0452788	hypo	9
chr4	40229060	40229367	3	-0.36719	0.340934	0.708124	0.0509149	hypo	9
chr10	134692785	134693274	12	-0.366565	0.241095	0.60766	0.0518262	hypo	9
chr15	80259627	80261190	19	-0.365904	0.26775	0.633654	0.0534032	hypo	3
chr12	801760	802006	5	-0.365748	0.375674	0.741422	0.0520318	hypo	9
chr19	2663415	2663478	3	-0.364515	0.52673	0.891245	0.0660866	hypo	9
chr10	64571221	64571514	9	-0.364459	0.366007	0.730466	0.0631396	hypo	9
chr9	116385533	116385970	7	-0.363906	0.391342	0.755247	0.0446012	hypo	9
chr19	461266	461287	4	-0.363476	0.0426034	0.406079	0.0719451	hypo	9
chr6	138191135	138191685	8	-0.363371	0.288508	0.651879	0.049813	hypo	9
chr1	212855273	212855873	4	-0.363162	0.408289	0.771451	0.0551911	hypo	9
chr16	47009912	47010083	4	-0.363044	0.558351	0.921395	0.0506841	hypo	9
chr7	105314310	105315091	7	-0.362343	0.335164	0.697506	0.0449457	hypo	9
chr10	14647373	14647753	5	-0.362076	0.326073	0.68815	0.0544372	hypo	9
chr1	235994233	235995375	10	-0.361318	0.480743	0.842061	0.0443643	hypo	9
chr9	136688773	136689223	16	-0.360559	0.342346	0.702904	0.0550815	hypo	5
chr1	112143561	112144109	7	-0.359739	0.36904	0.728779	0.0506872	hypo	9
chr7	5581353	5581699	9	-0.35971	0.345999	0.705709	0.0707752	hypo	9
chr3	125314922	125315101	12	-0.359705	0.24406	0.603766	0.0504522	hypo	9
chr17	38334703	38334843	4	-0.358873	0.376552	0.735425	0.052245	hypo	9
chr19	44257387	44258053	10	-0.357764	0.309679	0.667443	0.0552071	hypo	9
chr10	104629830	104629951	5	0.357263	0.700194	0.342932	0.0673837	hyper	9
chr22	45717729	45718031	9	-0.35686	0.368508	0.725368	0.062581	hypo	9
chr16	47010467	47010846	4	-0.356173	0.548827	0.905	0.0506841	hypo	9
chr11	729750	730130	8	-0.355185	0.491905	0.84709	0.0573322	hypo	9
chr1	117110998	117111254	3	-0.355093	0.569706	0.9248	0.0618943	hypo	9
chr9	132146266	132146481	5	-0.354503	0.0813511	0.435854	0.0668457	hypo	9
chr5	73194971	73195346	11	-0.353641	0.458962	0.812604	0.0615176	hypo	9
chr20	61457195	61457210	3	0.35267	0.724288	0.371618	0.0649286	hyper	9
chr3	188015983	188016569	8	-0.351635	0.490553	0.842188	0.0460313	hypo	9
chr17	6541527	6541772	5	-0.350928	0.458475	0.809403	0.0546537	hypo	9
chr17	3673643	3674164	9	-0.350899	0.305483	0.656382	0.0583875	hypo	9
chr18	57594393	57595185	10	-0.350711	0.324677	0.675388	0.0512075	hypo	9
chr4	1346264	1346437	6	0.350384	0.830824	0.48044	0.0646674	hyper	9
chr3	188016899	188017654	16	-0.349667	0.517997	0.867663	0.0460293	hypo	5
chr10	3799562	3800152	13	-0.349121	0.360655	0.709776	0.0536811	hypo	8
chr7	150677045	150677164	5	0.348733	0.677897	0.329164	0.0695528	hyper	9
chr5	148724161	148724256	4	-0.348642	0.529463	0.878105	0.0498001	hypo	9
chr16	71879119	71879424	6	0.348245	0.673186	0.324942	0.0611242	hyper	9
chr1	227012562	227012853	8	-0.348163	0.34086	0.689022	0.0566345	hypo	9
chr1	12475037	12475428	6	-0.347781	0.515691	0.863472	0.0432681	hypo	9
chr11	9231110	9232315	10	-0.347566	0.445372	0.792938	0.0467578	hypo	9
chr2	231790281	231791253	16	-0.347465	0.414082	0.761547	0.0481285	hypo	5
chr9	119448825	119449033	4	-0.347191	0.400587	0.747778	0.0529653	hypo	9
chr5	60242045	60242090	3	0.346929	0.581188	0.234259	0.056983	hyper	9
chr22	18283762	18283796	3	-0.346856	0.193762	0.540618	0.0688189	hypo	9
chr6	227254	228302	23	-0.346593	0.300211	0.646804	0.0534922	hypo	3
chr19	45667461	45667760	4	-0.345876	0.211928	0.557804	0.0702725	hypo	9
chr2	24625588	24625714	6	-0.345228	0.404061	0.749289	0.0496091	hypo	9
chr6	2940693	2940996	17	-0.344731	0.222638	0.567369	0.0722564	hypo	3
chr18	56278564	56279391	14	-0.343384	0.515891	0.859275	0.0506369	hypo	6
chr12	111053316	111053734	6	-0.342911	0.371689	0.7146	0.0550831	hypo	9
chr1	16768719	16769948	19	-0.342853	0.568405	0.911258	0.0444056	hypo	3
chr2	233973991	233974351	7	-0.342818	0.445944	0.788762	0.0524584	hypo	9
chr2	65546533	65546881	3	-0.342766	0.424793	0.767559	0.0545849	hypo	9
chr7	29845756	29845855	3	-0.342699	0.324488	0.667187	0.0491686	hypo	9
chr18	77659735	77659791	7	0.342272	0.874337	0.532065	0.062112	hyper	9
chr16	57393330	57393605	3	-0.342205	0.339394	0.681599	0.0505039	hypo	9
chr14	54863177	54863254	3	-0.341421	0.178236	0.519657	0.0687025	hypo	9
chr6	20319433	20319507	8	0.341168	0.899605	0.558437	0.0587602	hyper	9
chr9	128422177	128422692	6	-0.340717	0.571371	0.912087	0.0462799	hypo	9
chr14	100808117	100808350	4	-0.340639	0.296132	0.636771	0.0574187	hypo	9
chr9	36740604	36740634	4	0.339431	0.877463	0.538032	0.0583949	hyper	9
chr7	22738127	22738811	8	-0.339175	0.410848	0.750024	0.0515668	hypo	9
chr19	1133856	1133870	3	0.339033	0.86617	0.527137	0.0605032	hyper	9
chr4	146729642	146729766	3	-0.338847	0.467685	0.806532	0.0420606	hypo	9
chr16	56968662	56968780	3	-0.338009	0.277655	0.615664	0.0570572	hypo	9
chr7	151079670	151079942	8	-0.337619	0.258207	0.595825	0.0532179	hypo	9
chr6	138192000	138192804	16	-0.337559	0.232684	0.570243	0.0498132	hypo	6
chr7	130584859	130585095	4	-0.336734	0.357843	0.694576	0.0633017	hypo	9
chr11	63829002	63829234	3	-0.336724	0.278075	0.614799	0.0610274	hypo	9
chr12	47701975	47702014	3	-0.336599	0.334739	0.671338	0.0677099	hypo	9
chr5	78907601	78907748	10	-0.335838	0.249697	0.585535	0.0512617	hypo	9
chr9	35664655	35664851	3	-0.335367	0.284444	0.619812	0.0535381	hypo	9
chr1	208416364	208416386	3	-0.334802	0.25309	0.587892	0.0517257	hypo	9
chr19	50398372	50399113	12	-0.334467	0.521931	0.856398	0.0551734	hypo	9
chr1	247693733	247694041	4	-0.334456	0.317637	0.652093	0.0671015	hypo	9
chr4	7804033	7804180	4	-0.333822	0.361569	0.695391	0.0513263	hypo	9
chr1	84327206	84327828	7	0.333744	0.929407	0.595663	0.0498859	hyper	9
chr17	8795649	8795883	7	-0.333539	0.381571	0.715111	0.0546428	hypo	9
chr2	242066932	242067251	8	-0.333494	0.157656	0.491151	0.0667557	hypo	9
chr6	30458601	30458930	3	-0.332941	0.174812	0.507753	0.0470192	hypo	9
chr19	6501518	6501613	5	-0.332844	0.231971	0.564815	0.0596711	hypo	9
chr4	120550750	120550779	3	-0.331984	0.378098	0.710081	0.0438879	hypo	9
chr7	100343327	100343382	3	0.33185	0.620102	0.288253	0.0616974	hyper	9
chr16	57572095	57572450	14	-0.331587	0.1625	0.494087	0.0507695	hypo	8
chr1	206648799	206648994	5	-0.331552	0.439216	0.770768	0.0512668	hypo	9
chr13	42979883	42980202	9	-0.331496	0.494042	0.825538	0.0421501	hypo	9
chr1	43251403	43251419	3	-0.331182	0.255372	0.586554	0.0466874	hypo	9
chr2	88301716	88301971	10	-0.331156	0.345692	0.676848	0.0677411	hypo	9
chr10	125854707	125855340	11	-0.331005	0.538146	0.869151	0.0541417	hypo	9
chr17	53500724	53501234	7	-0.329754	0.559898	0.889652	0.0491427	hypo	9
chr6	159069807	159070141	5	-0.32975	0.435204	0.764954	0.0542305	hypo	9
chr14	52311308	52312665	18	-0.329599	0.156351	0.48595	0.0424732	hypo	6
chr9	34636932	34636953	3	0.329091	0.568592	0.239501	0.0640945	hyper	9
chr1	16301350	16301478	5	-0.328849	0.236522	0.565371	0.0548366	hypo	9
chr2	70129463	70129594	3	-0.328698	0.36155	0.690248	0.0509008	hypo	9
chr14	65017391	65017651	5	-0.328544	0.189458	0.518002	0.0588224	hypo	9
chr17	46987079	46987464	5	-0.328475	0.354837	0.683312	0.0471623	hypo	9
chr20	866577	866897	3	-0.328436	0.440512	0.768948	0.0645279	hypo	9
chr1	32799069	32799717	4	-0.328242	0.565674	0.893915	0.0480838	hypo	9
chr6	57183071	57183210	3	-0.327969	0.300787	0.628755	0.0433653	hypo	9
chr14	74893028	74893055	5	-0.327676	0.0736149	0.401291	0.0542	hypo	9
chr11	70517775	70517976	5	-0.327639	0.278749	0.606387	0.0576067	hypo	9
chr16	9014825	9015514	10	-0.327262	0.620469	0.947731	0.0451527	hypo	9
chr18	21719724	21719802	6	-0.3268	0.470869	0.797668	0.0545608	hypo	9
chr1	32054994	32055043	4	0.326727	0.727343	0.400616	0.0609565	hyper	9
chr9	132695170	132696272	12	-0.326671	0.395194	0.721865	0.0500855	hypo	9
chr1	112145439	112146266	8	-0.326496	0.369091	0.695587	0.0488993	hypo	9
chr20	36007542	36007983	11	-0.326183	0.404517	0.730701	0.0576553	hypo	9
chr5	459002	459332	4	-0.325625	0.401756	0.727381	0.0459343	hypo	9
chr2	152623232	152624151	8	-0.325603	0.258541	0.584144	0.0505084	hypo	9
chr8	1813426	1813540	3	-0.325446	0.465707	0.791153	0.0515503	hypo	9
chr2	100746862	100747114	6	-0.325438	0.514299	0.839737	0.0453399	hypo	9
chr19	1478461	1478531	3	-0.325139	0.443421	0.76856	0.0526752	hypo	9
chr15	23035231	23035421	4	-0.325107	0.320199	0.645306	0.0490379	hypo	9
chr1	234367187	234367256	11	-0.324968	0.468409	0.793378	0.0574997	hypo	9
chr14	65381962	65382007	3	0.324946	0.677984	0.353038	0.0448918	hyper	9
chr8	29357193	29357818	12	-0.324331	0.150518	0.474848	0.0496563	hypo	9
chr15	80215004	80215207	7	0.324302	0.695851	0.371549	0.0492668	hyper	9
chr16	734745	734844	4	-0.324114	0.331041	0.655155	0.0538315	hypo	9
chr13	41271823	41272107	6	0.323549	0.586747	0.263198	0.0591297	hyper	9
chr12	120109194	120109492	7	-0.323261	0.583967	0.907228	0.0546604	hypo	9
chr20	43992648	43992825	6	-0.322829	0.366823	0.689652	0.0525933	hypo	9
chr14	82002535	82002624	3	-0.322705	0.369672	0.692377	0.0566042	hypo	9
chr9	132696625	132697328	14	-0.322702	0.492873	0.815575	0.0500855	hypo	8
chr6	30459342	30459877	10	-0.32268	0.40591	0.72859	0.0470192	hypo	9
chr12	1101233	1101298	6	-0.322525	0.167586	0.490111	0.045462	hypo	9
chr19	10987315	10987754	7	-0.322437	0.447869	0.770305	0.054666	hypo	9
chr17	48640243	48640476	5	-0.322337	0.325924	0.648262	0.0501738	hypo	9
chr1	43918933	43918993	4	-0.322025	0.207889	0.529914	0.0463575	hypo	9
chr14	106095701	106096242	16	-0.321953	0.500402	0.822355	0.0564843	hypo	7
chr17	8060664	8060728	3	-0.321869	0.443064	0.764933	0.0613498	hypo	9
chr5	150464710	150464882	3	-0.321703	0.44307	0.764773	0.0479075	hypo	9
chr1	155242321	155242347	3	-0.321566	0.402968	0.724535	0.0484851	hypo	9
chr10	15209430	15209559	4	-0.321354	0.236318	0.557672	0.0569439	hypo	9
chr1	3718021	3718241	5	-0.32115	0.170075	0.491225	0.0596322	hypo	9
chr5	157298033	157298651	7	-0.321137	0.506759	0.827896	0.0470622	hypo	9
chr17	60571690	60571837	3	0.321082	0.889464	0.568382	0.0573656	hyper	9
chr7	140135546	140135611	13	-0.32086	0.420753	0.741612	0.0678019	hypo	9
chr3	178978554	178978598	3	0.320859	0.903805	0.582945	0.0569444	hyper	9
chr16	89114549	89114919	19	-0.320773	0.354696	0.675469	0.0562863	hypo	6
chr6	30784713	30784774	3	-0.320245	0.502287	0.822532	0.0488116	hypo	9
chr9	122128954	122129194	3	-0.320201	0.372457	0.692658	0.0598785	hypo	9
chr1	28465135	28465605	9	-0.320075	0.432774	0.752849	0.0492632	hypo	9
chr20	62492186	62492350	6	0.320015	0.722275	0.40226	0.0588734	hyper	9
chr12	111768251	111768403	3	-0.319889	0.478406	0.798295	0.0543686	hypo	9
chr8	145219592	145219777	3	-0.319214	0.618838	0.938052	0.0435811	hypo	9
chr21	45623220	45623699	13	-0.319062	0.373308	0.692371	0.0498899	hypo	9
chr1	51875761	51875933	7	-0.318972	0.565797	0.884769	0.0438364	hypo	9
chr10	134310949	134311146	9	-0.318824	0.368578	0.687402	0.0554354	hypo	9
chr15	72521434	72521755	6	-0.318786	0.175861	0.494647	0.0572976	hypo	9
chr7	50420285	50420385	3	-0.31866	0.344394	0.663055	0.0565274	hypo	9
chr7	96746629	96746731	5	0.318527	0.55846	0.239933	0.0532417	hyper	9
chr19	12779557	12779628	3	-0.318194	0.293568	0.611762	0.0529851	hypo	9
chr16	87540556	87540722	5	-0.31813	0.511384	0.829514	0.056282	hypo	9
chr17	27215216	27215432	6	-0.317726	0.345349	0.663075	0.0532274	hypo	9
chr9	137320707	137320781	4	0.317708	0.843151	0.525443	0.0712576	hyper	9
chr7	65971624	65971710	3	-0.317448	0.332677	0.650125	0.0555771	hypo	9
chr9	94444500	94444647	7	0.317251	0.724383	0.407132	0.0531423	hyper	9
chr15	80282723	80282906	4	-0.317179	0.532606	0.849785	0.0519763	hypo	9
chr6	78174286	78174539	5	-0.317048	0.362213	0.679261	0.0494335	hypo	9
chr18	12253141	12253310	5	-0.316907	0.396104	0.713011	0.0483829	hypo	9
chr12	27484354	27484587	5	-0.31605	0.297969	0.614019	0.0539554	hypo	9
chr6	28058391	28058724	5	0.316029	0.668572	0.352543	0.0582189	hyper	9
chr7	2001375	2002017	16	-0.315901	0.49106	0.80696	0.048893	hypo	7
chr17	46992714	46993161	5	-0.315238	0.427199	0.742437	0.0516508	hypo	9
chr12	133336962	133337233	10	-0.315133	0.437665	0.752799	0.0538531	hypo	9
chr17	17684240	17684649	6	-0.315078	0.32693	0.642008	0.0538776	hypo	9
chr1	2458598	2458649	4	-0.314946	0.208116	0.523062	0.0583049	hypo	9
chr6	27106356	27106564	3	-0.31471	0.374363	0.689074	0.0484162	hypo	9
chr10	98348430	98349048	5	-0.314661	0.428417	0.743078	0.0453226	hypo	9
chr12	124222516	124222733	6	-0.314643	0.573051	0.887694	0.0554704	hypo	9
chr13	27751095	27751947	12	-0.314619	0.368752	0.683371	0.0452999	hypo	9
chr3	127864361	127864417	5	0.314427	0.567829	0.253402	0.0486456	hyper	9
chr7	101596625	101597132	14	-0.314173	0.324221	0.638393	0.0586821	hypo	9
chr3	38040290	38040329	4	-0.313911	0.183993	0.497904	0.0559277	hypo	9
chr12	112534559	112535083	3	-0.313869	0.511982	0.825851	0.0423948	hypo	9
chr1	24246290	24246639	9	-0.313137	0.218991	0.532127	0.0509572	hypo	9
chr2	97151572	97152445	18	-0.313028	0.179012	0.49204	0.0486005	hypo	7
chr2	233973466	233973536	4	-0.312747	0.362398	0.675145	0.0524584	hypo	9
chr9	132124483	132124720	6	-0.312705	0.256291	0.568996	0.047458	hypo	9
chr9	127176827	127176996	3	-0.312592	0.410815	0.723407	0.0523923	hypo	9
chr22	17577965	17578148	6	0.312085	0.810093	0.498008	0.0582114	hyper	9
chr15	89875811	89875830	4	-0.311788	0.41451	0.726297	0.05533	hypo	9
chr3	125803639	125803859	5	0.311783	0.792456	0.480673	0.0445404	hyper	9
chr2	224701329	224701498	11	-0.311502	0.188177	0.499679	0.0630224	hypo	9
chr3	112051296	112051561	6	0.31133	0.848212	0.536882	0.0534482	hyper	9
chr21	43654385	43654527	3	-0.311263	0.311743	0.623005	0.0548339	hypo	9
chr16	16092568	16092926	6	-0.311123	0.382788	0.69391	0.0581634	hypo	9
chr15	81454158	81454504	7	-0.310985	0.32221	0.633196	0.0562257	hypo	9
chr9	34988294	34988604	13	0.310704	0.49812	0.187416	0.0623375	hyper	9
chr8	135700577	135700621	3	-0.310652	0.428486	0.739138	0.0614183	hypo	9
chr20	62666486	62666700	8	-0.310024	0.569752	0.879776	0.0565188	hypo	9
chr13	29215848	29216342	5	-0.309517	0.567878	0.877395	0.0481046	hypo	9
chr6	28862990	28863060	4	-0.309331	0.349706	0.659037	0.0484766	hypo	9
chr19	52801260	52801467	4	-0.309038	0.366699	0.675737	0.0502877	hypo	9
chr2	74427059	74427301	8	-0.308527	0.492454	0.800981	0.0631046	hypo	9
chr6	90759080	90759581	6	-0.308468	0.514954	0.823422	0.0467211	hypo	9
chr6	91003200	91003255	3	-0.308436	0.591215	0.89965	0.045446	hypo	9
chr19	6039156	6039551	8	-0.308276	0.381443	0.689719	0.0485945	hypo	9
chr13	42979068	42979243	3	-0.307799	0.5268	0.834598	0.042047	hypo	9
chr11	60828551	60829101	14	-0.307725	0.360385	0.668111	0.0477445	hypo	9
chr16	10874582	10875100	7	-0.307421	0.656572	0.963993	0.0484557	hypo	9
chr8	144606571	144606739	7	-0.307334	0.433263	0.740597	0.0492136	hypo	9
chr10	18738661	18739369	9	-0.307204	0.419717	0.726921	0.0506482	hypo	9
chr4	17813808	17814109	3	-0.307185	0.311745	0.61893	0.0490004	hypo	9
chr6	157044951	157045461	9	-0.307108	0.520046	0.827153	0.0489019	hypo	9
chr20	46993493	46994075	10	-0.306841	0.525888	0.83273	0.0538841	hypo	9
chr7	22736785	22737340	4	-0.306781	0.368348	0.675129	0.0488517	hypo	9
chr7	5567358	5568044	17	-0.306516	0.337645	0.644162	0.050222	hypo	7
chr21	43835234	43835669	14	-0.306512	0.304916	0.611429	0.0604817	hypo	9
chr9	139660702	139660797	4	0.306346	0.722301	0.415955	0.0567581	hyper	9
chr15	68549103	68549191	7	-0.306279	0.283746	0.590025	0.0558729	hypo	9
chr15	63504296	63505032	10	-0.306098	0.41422	0.720317	0.0515435	hypo	9
chr11	8616413	8616553	4	0.305926	0.93299	0.627064	0.0624877	hyper	9
chr3	46940636	46940748	5	-0.305817	0.480519	0.786335	0.0459568	hypo	9
chr1	168118190	168118291	3	-0.305412	0.40832	0.713732	0.0553637	hypo	9
chr11	34012901	34013071	8	0.305347	0.707015	0.401668	0.0593278	hyper	9
chr3	52568395	52568449	5	-0.305209	0.445071	0.750281	0.0472579	hypo	9
chr3	10183098	10183156	7	0.305005	0.835544	0.530539	0.062472	hyper	9
chr10	11314921	11315478	13	-0.304674	0.495012	0.799686	0.0528649	hypo	9
chr14	103221005	103221475	12	-0.304669	0.44908	0.753749	0.0562031	hypo	9
chr5	159414880	159415041	8	0.304476	0.731715	0.427238	0.059772	hyper	9
chr7	134872421	134872539	3	-0.304345	0.554053	0.858398	0.045227	hypo	9
chr17	43395387	43395522	5	-0.304274	0.430524	0.734797	0.0471299	hypo	9
chr9	128441825	128442657	10	-0.304259	0.600714	0.904973	0.0511993	hypo	9
chr4	111396876	111397244	9	-0.304248	0.49914	0.803388	0.0492016	hypo	9
chr1	25048981	25049350	11	0.304199	0.823077	0.518877	0.0515157	hyper	9
chr17	12570694	12570843	6	-0.304064	0.417298	0.721362	0.0510021	hypo	9
chr6	159291475	159291661	6	-0.303881	0.441677	0.745559	0.0435876	hypo	9
chr10	4045653	4046041	5	-0.303808	0.546226	0.850034	0.0562766	hypo	9
chr14	103606636	103607040	5	-0.303616	0.281814	0.585431	0.0497878	hypo	9
chr16	66612567	66612640	4	-0.303503	0.44836	0.751863	0.0521849	hypo	9
chr12	51156820	51156916	5	-0.303439	0.477211	0.78065	0.0567316	hypo	9
chr11	77121723	77122103	5	0.303345	0.602914	0.299569	0.0515447	hyper	9
chr6	164507060	164507321	5	-0.30313	0.30756	0.610689	0.0562452	hypo	9
chr16	58496670	58496854	6	0.303055	0.734922	0.431867	0.0502888	hyper	9
chr7	17199338	17199938	5	-0.302928	0.557424	0.860352	0.0471459	hypo	9
chr10	30799474	30800044	8	-0.302902	0.503006	0.805908	0.0518181	hypo	9
chr1	153715342	153715578	3	-0.302707	0.378094	0.6808	0.0489676	hypo	9
chr16	84179469	84179498	3	-0.302628	0.456721	0.759348	0.0554233	hypo	9
chr7	105315797	105316028	7	-0.302403	0.446184	0.748587	0.0449457	hypo	9
chr14	68968913	68969352	10	-0.302398	0.437784	0.740181	0.053659	hypo	9
chr10	11482152	11482932	11	-0.302273	0.29852	0.600793	0.045071	hypo	9
chr22	38642025	38642063	4	0.302212	0.794279	0.492067	0.0611429	hyper	9
chr6	36648794	36648907	4	-0.301899	0.251956	0.553855	0.0574461	hypo	9
chr22	33868653	33869404	9	-0.301709	0.557106	0.858815	0.0474337	hypo	9
chr17	21003570	21003747	4	0.300882	0.868851	0.567969	0.060632	hyper	9
chr11	9230341	9230805	8	-0.300802	0.486059	0.786861	0.0467578	hypo	9
chr6	27486123	27486276	4	0.300729	0.629295	0.328566	0.0556787	hyper	9
chr1	47780720	47780805	6	0.30063	0.833949	0.533319	0.0481055	hyper	9
chr4	146728161	146729164	15	-0.300615	0.478784	0.779399	0.0420606	hypo	9
chr16	359523	359566	3	0.300365	0.806397	0.506032	0.0631367	hyper	9
chr2	1129413	1129633	7	0.300341	0.645127	0.344786	0.0527091	hyper	9
chr7	157530804	157531239	11	-0.300245	0.356506	0.656751	0.0516171	hypo	9
chr5	169232928	169233218	3	-0.300201	0.209635	0.509835	0.056361	hypo	9
chr15	100879413	100879581	4	-0.300046	0.435553	0.735598	0.0559582	hypo	9
chr17	1245971	1246435	16	-0.29983	0.4975	0.797331	0.0542455	hypo	9
chr5	126625430	126625591	4	0.299724	0.699614	0.39989	0.0477599	hyper	9
chr7	75779908	75780167	10	0.29969	0.84714	0.54745	0.0587404	hyper	9
chr6	30785128	30785245	3	-0.299192	0.525914	0.825106	0.0490293	hypo	9
chr8	9106782	9106869	4	-0.299181	0.329173	0.628353	0.0550316	hypo	9
chr11	118922556	118922945	9	-0.299114	0.329332	0.628446	0.055724	hypo	9
chr7	148853829	148854313	9	-0.298764	0.613472	0.912236	0.0451871	hypo	9
chr3	50304639	50305126	9	0.298719	0.640181	0.341462	0.0556085	hyper	9
chr20	3887268	3888488	20	-0.298626	0.459365	0.757991	0.0481532	hypo	5
chr9	133319899	133319936	5	-0.298602	0.0702765	0.368878	0.0545264	hypo	9
chr19	50071540	50071672	4	-0.298584	0.423034	0.721617	0.0633235	hypo	9
chr22	38019410	38019580	6	0.298139	0.643904	0.345765	0.0625195	hyper	9
chr9	90793742	90794094	9	0.298038	0.578908	0.28087	0.0568667	hyper	9
chr7	128099007	128099270	4	-0.29796	0.585204	0.883164	0.0501491	hypo	9
chr12	132303823	132303933	6	-0.297904	0.251108	0.549013	0.0607216	hypo	9
chr6	152078799	152079083	5	-0.297899	0.426859	0.724758	0.0464421	hypo	9
chr3	156273430	156273486	4	-0.297758	0.240458	0.538216	0.0482066	hypo	9
chr4	146730103	146730256	3	-0.297449	0.547586	0.845035	0.0420606	hypo	9
chr11	123008747	123009049	5	-0.297437	0.389489	0.686927	0.0588742	hypo	9
chr5	180072371	180072772	11	-0.297401	0.425098	0.722499	0.0552406	hypo	9
chr5	10684977	10685674	14	-0.297135	0.610347	0.907482	0.0467893	hypo	9
chr17	17763979	17764331	7	-0.297092	0.475295	0.772387	0.0561795	hypo	9
chr2	220468582	220468716	3	0.296913	0.700927	0.404013	0.0555333	hyper	9
chr7	134871465	134872027	16	-0.296873	0.474085	0.770958	0.045227	hypo	9
chr10	61640702	61641108	5	-0.296848	0.409059	0.705906	0.0440384	hypo	9
chr10	11318184	11318867	17	-0.296733	0.483471	0.780204	0.0468407	hypo	8
chr16	71918823	71918947	7	-0.296688	0.294496	0.591184	0.0558383	hypo	9
chr19	51626261	51626812	10	-0.29617	0.500462	0.796632	0.0529118	hypo	9
chr2	242844103	242844241	6	0.296114	0.792867	0.496753	0.0658958	hyper	9
chr1	182911618	182911925	5	0.295773	0.649262	0.353489	0.0513807	hyper	9
chr5	399703	399753	3	-0.295654	0.381506	0.67716	0.0519522	hypo	9
chr19	11279366	11279630	6	0.295319	0.943952	0.648633	0.0515721	hyper	9
chr13	29124915	29125473	7	-0.295276	0.531071	0.826347	0.0409863	hypo	9
chr3	52189284	52189336	3	-0.295102	0.301484	0.596586	0.0491955	hypo	9
chr10	61639737	61640319	7	-0.295052	0.391459	0.686511	0.0439423	hypo	9
chr1	38397908	38397981	4	-0.295039	0.246163	0.541203	0.0513114	hypo	9
chr4	40230892	40231146	6	-0.294967	0.553067	0.848034	0.0493878	hypo	9
chr7	112725778	112725946	10	-0.294893	0.277789	0.572682	0.0545145	hypo	9
chr2	201451303	201451385	6	0.294814	0.510645	0.215831	0.0542672	hyper	9
chr20	52317337	52317619	9	-0.294766	0.478117	0.772883	0.0486309	hypo	9
chr7	150140881	150141328	9	-0.294408	0.388076	0.682484	0.0520337	hypo	9
chr4	147164696	147164733	4	-0.294259	0.346358	0.640617	0.0621276	hypo	9
chr1	204183784	204183860	3	-0.294164	0.318617	0.61278	0.0557001	hypo	9
chr11	65729986	65730144	4	-0.294059	0.351433	0.645492	0.0472949	hypo	9
chr1	160310786	160311217	3	-0.29382	0.580661	0.874481	0.0491835	hypo	9
chr2	97539258	97539896	10	-0.293714	0.358862	0.652577	0.0496148	hypo	9
chr16	69801240	69801676	5	-0.293575	0.573276	0.866851	0.0466184	hypo	9
chr1	12138860	12139206	9	-0.293293	0.318493	0.611786	0.0476284	hypo	9
chr13	50069148	50069194	3	0.293196	0.605111	0.311915	0.0483471	hyper	9
chr16	11082346	11082615	5	-0.292925	0.316498	0.609422	0.0546227	hypo	9
chr12	50900491	50900722	5	-0.292838	0.404673	0.697511	0.0577937	hypo	9
chr19	8114772	8114997	3	0.292836	0.752278	0.459442	0.0544518	hyper	9
chr10	88698492	88698657	4	0.292821	0.965755	0.672934	0.051236	hyper	9
chr19	2182778	2183107	12	-0.292714	0.358279	0.650993	0.0544946	hypo	9
chr11	64516974	64517068	4	0.292668	0.775782	0.483114	0.044668	hyper	9
chr20	61915959	61916020	5	0.292537	0.896527	0.60399	0.0566634	hyper	9
chr20	25420046	25420562	6	0.292429	0.75393	0.4615	0.0504177	hyper	9
chr11	71641799	71642679	14	-0.292325	0.283334	0.575659	0.0447488	hypo	9
chr14	24437723	24437972	3	-0.292193	0.3387	0.630892	0.0511131	hypo	9
chr9	37402563	37402702	3	-0.292053	0.41455	0.706603	0.0459061	hypo	9
chr21	44817040	44817256	4	-0.291905	0.407394	0.699299	0.0505537	hypo	9
chr3	16412350	16412517	6	-0.291855	0.409141	0.700996	0.0539923	hypo	9
chr4	185606214	185606346	4	-0.291772	0.501174	0.792946	0.0515233	hypo	9
chr21	37608457	37608978	8	-0.291699	0.386223	0.677922	0.0534478	hypo	9
chr11	33677143	33678357	18	-0.2913	0.537883	0.829183	0.0443345	hypo	7
chr11	117807086	117807694	5	-0.290758	0.544749	0.835507	0.0466322	hypo	9
chr1	168198520	168198690	5	0.290651	0.862227	0.571576	0.0542014	hyper	9
chr7	130332849	130332861	3	0.290196	0.902723	0.612526	0.0602565	hyper	9
chr8	142377361	142377397	5	-0.289946	0.256904	0.54685	0.0490385	hypo	9
chr9	138594395	138594474	7	0.289784	0.581747	0.291963	0.0607668	hyper	9
chr5	137182963	137183718	8	-0.289742	0.637913	0.927654	0.0431088	hypo	9
chr7	4752325	4752678	9	-0.289388	0.398237	0.687625	0.0527665	hypo	9
chr1	206965648	206967305	29	-0.289259	0.484884	0.774143	0.044212	hypo	2
chr21	43977216	43977503	12	-0.28925	0.482521	0.771771	0.056231	hypo	9
chr7	8165207	8165362	3	-0.28925	0.474307	0.763556	0.0468431	hypo	9
chr12	3948475	3948555	4	0.289141	0.753896	0.464755	0.0547545	hyper	9
chr15	52298408	52299383	7	-0.289127	0.432247	0.721375	0.0498444	hypo	9
chr3	49745092	49745234	4	0.289034	0.692296	0.403263	0.0443863	hyper	9
chr7	93522209	93522666	4	-0.289006	0.6366	0.925605	0.0505505	hypo	9
chr9	115982084	115982197	3	-0.289001	0.158587	0.447588	0.0504711	hypo	9
chr3	4818809	4819436	8	-0.288766	0.511085	0.799852	0.0493138	hypo	9
chr3	16412963	16413115	4	-0.28838	0.216668	0.505048	0.0546696	hypo	9
chr3	4871760	4871939	5	-0.28829	0.416839	0.70513	0.0577039	hypo	9
chr17	53522611	53523185	4	-0.288142	0.530169	0.818311	0.0490945	hypo	9
chr6	26520775	26520857	5	-0.288065	0.139355	0.42742	0.0543049	hypo	9
chr3	195589994	195590104	7	-0.287959	0.532018	0.819977	0.0555842	hypo	9
chr18	3624436	3624534	3	-0.287847	0.442891	0.730739	0.0521663	hypo	9
chr19	1183869	1184043	7	-0.287754	0.461537	0.749291	0.0567968	hypo	9
chr7	128763280	128763405	3	-0.287698	0.333928	0.621625	0.0480781	hypo	9
chr17	16867749	16868105	4	-0.287109	0.499642	0.786751	0.0598208	hypo	9
chr1	6555445	6555688	3	0.28699	0.740156	0.453166	0.0563486	hyper	9
chr1	84944681	84944746	3	-0.286906	0.493558	0.780464	0.0484431	hypo	9
chr17	80604961	80605073	8	-0.286672	0.324693	0.611366	0.0592221	hypo	9
chr17	57420046	57420362	4	-0.286639	0.553842	0.840481	0.0462936	hypo	9
chr18	46451216	46451456	10	-0.286485	0.472302	0.758787	0.0502178	hypo	9
chr19	50038967	50039085	3	-0.286408	0.260734	0.547143	0.0532446	hypo	9
chr4	36321870	36322182	5	-0.28635	0.567142	0.853491	0.0483475	hypo	9
chr17	80807354	80807467	4	0.285965	0.56935	0.283384	0.0597344	hyper	9
chr3	185911303	185911355	5	-0.285455	0.269825	0.55528	0.0528135	hypo	9
chr7	128099628	128099895	4	-0.285451	0.580762	0.866212	0.0502121	hypo	9
chr6	112688564	112688757	6	-0.28537	0.473803	0.759173	0.0499729	hypo	9
chr10	92914564	92914818	3	-0.285363	0.53438	0.819743	0.0521485	hypo	9
chr9	136213633	136213930	9	-0.285244	0.232511	0.517755	0.0507438	hypo	9
chr20	43118723	43118955	3	-0.285173	0.588012	0.873185	0.0477889	hypo	9
chr17	58211698	58211757	3	-0.285028	0.34128	0.626308	0.0480266	hypo	9
chr19	50241571	50241846	4	-0.28489	0.661519	0.946409	0.0504083	hypo	9
chr6	74270132	74270671	7	-0.284864	0.49408	0.778944	0.0493902	hypo	9
chr13	109812634	109812878	6	-0.284791	0.502466	0.787256	0.0487021	hypo	9
chr18	77161117	77161267	8	0.284674	0.632076	0.347403	0.0579476	hyper	9
chr3	128518951	128520622	14	-0.284636	0.64026	0.924896	0.0435332	hypo	9
chr15	31638223	31638863	11	-0.284316	0.167782	0.452099	0.0510795	hypo	9
chr7	130705894	130706907	17	-0.284118	0.363378	0.647496	0.049246	hypo	8
chr8	42248381	42248808	6	-0.284091	0.343939	0.62803	0.0434723	hypo	9
chr22	41776969	41777048	4	0.284074	0.426447	0.142373	0.0563234	hyper	9
chr12	24991962	24992446	9	-0.28348	0.480821	0.764301	0.0497642	hypo	9
chr10	134736434	134736491	5	0.283113	0.634108	0.350994	0.0549074	hyper	9
chr20	44748455	44748639	3	-0.283058	0.16453	0.447588	0.050251	hypo	9
chr18	46281430	46281820	6	-0.282675	0.537255	0.81993	0.0433557	hypo	9
chr17	80944680	80944743	5	-0.282213	0.517281	0.799494	0.0529486	hypo	9
chr2	50575234	50575326	3	-0.282152	0.265392	0.547544	0.0464612	hypo	9
chr17	20009211	20009419	4	-0.281759	0.582111	0.86387	0.0483123	hypo	9
chr20	61620191	61620335	4	0.281736	0.728885	0.447149	0.0494332	hyper	9
chr1	167407920	167408234	4	0.281501	0.654855	0.373354	0.0550433	hyper	9
chr1	207628543	207629072	6	-0.281328	0.338501	0.619829	0.0465502	hypo	9
chr8	140741330	140742127	10	-0.280758	0.361208	0.641966	0.0468648	hypo	9
chr14	23019167	23020317	21	-0.280599	0.297437	0.578036	0.0431673	hypo	5
chr3	100429513	100429641	3	-0.280385	0.348953	0.629337	0.044532	hypo	9
chr18	10482440	10482500	5	0.280373	0.66727	0.386896	0.0557209	hyper	9
chr14	103285373	103285822	10	-0.280313	0.600785	0.881098	0.0417014	hypo	9
chr12	38531645	38531714	6	0.280189	0.804969	0.52478	0.0577545	hyper	9
chr6	143233590	143234419	18	-0.280157	0.353837	0.633995	0.0505666	hypo	7
chr2	65612167	65612252	3	-0.280128	0.535312	0.81544	0.0472011	hypo	9
chr4	53729047	53729193	4	-0.279889	0.337965	0.617854	0.0518611	hypo	9
chr18	72277416	72278369	15	-0.279693	0.646937	0.92663	0.0442892	hypo	9
chr5	150489665	150490081	6	-0.279688	0.43557	0.715258	0.0475447	hypo	9
chr11	60683137	60683483	5	-0.279487	0.0930067	0.372493	0.0496045	hypo	9
chr4	81953392	81953544	3	-0.278763	0.311223	0.589986	0.0477329	hypo	9
chr1	169443091	169443325	4	-0.278709	0.559622	0.838331	0.0464736	hypo	9
chr19	58514889	58514923	5	-0.278671	0.28059	0.559261	0.0530782	hypo	9
chr19	1354145	1354195	3	0.278548	0.734722	0.456175	0.058394	hyper	9
chr14	74228150	74228402	3	-0.278512	0.40162	0.680133	0.0571794	hypo	9
chr2	231133171	231133441	4	-0.278434	0.494924	0.773358	0.0514635	hypo	9
chr5	32542511	32543323	11	-0.278402	0.568177	0.846579	0.0456297	hypo	9
chr6	38645331	38645380	3	-0.278367	0.483074	0.761441	0.0491345	hypo	9
chr8	66750596	66751182	6	-0.278159	0.310051	0.58821	0.048429	hypo	9
chr5	32443232	32443324	4	-0.278149	0.27426	0.552408	0.0499021	hypo	9
chr11	18406198	18406260	3	-0.278129	0.296397	0.574526	0.0524393	hypo	9
chr16	569998	570108	5	-0.278112	0.602033	0.880146	0.0478158	hypo	9
chr5	14408854	14409714	16	-0.278104	0.69444	0.972543	0.0412354	hypo	9
chr22	37080826	37081281	11	0.277933	0.64575	0.367817	0.0528097	hyper	9
chr20	43108099	43108349	6	-0.277917	0.493162	0.77108	0.0502405	hypo	9
chr17	8095608	8096007	6	-0.277806	0.392576	0.670382	0.0560717	hypo	9
chr9	140483976	140484038	4	0.277783	0.581127	0.303344	0.0546251	hyper	9
chr1	23503519	23503635	4	0.277779	0.878268	0.600489	0.0506658	hyper	9
chr9	127088740	127089310	13	-0.277725	0.680268	0.957994	0.0465901	hypo	9
chr16	11118925	11119401	5	-0.277709	0.665451	0.94316	0.0472969	hypo	9
chr11	61103423	61104082	9	-0.27767	0.471899	0.749569	0.0474718	hypo	9
chr14	106134570	106134592	4	-0.277497	0.26873	0.546227	0.0598445	hypo	9
chr2	225904903	225905230	5	-0.277275	0.497279	0.774554	0.0439026	hypo	9
chr8	141602143	141602432	7	0.277044	0.666154	0.389109	0.0534476	hyper	9
chr3	56836581	56836621	4	-0.276653	0.338774	0.615427	0.0557992	hypo	9
chr18	46359544	46359889	5	-0.276409	0.24544	0.521849	0.0528883	hypo	9
chr11	32417446	32418007	10	0.276346	0.577907	0.301561	0.0565032	hyper	9
chr6	45678176	45678488	5	-0.276191	0.539242	0.815433	0.0490686	hypo	9
chr1	227183444	227183911	8	-0.275927	0.499728	0.775655	0.0481021	hypo	9
chr22	31932973	31933389	6	-0.275873	0.622356	0.898229	0.0480367	hypo	9
chr14	90798926	90799112	3	0.275815	0.741643	0.465828	0.052319	hyper	9
chr2	9232279	9232854	7	-0.27554	0.205241	0.48078	0.051277	hypo	9
chr17	56779215	56779572	4	-0.275493	0.568861	0.844354	0.0485571	hypo	9
chr3	151844936	151845081	4	-0.275446	0.632549	0.907995	0.0416165	hypo	9
chr18	46985830	46985904	3	-0.275307	0.454308	0.729614	0.0511616	hypo	9
chr1	229760606	229760673	4	0.27524	0.594625	0.319385	0.0494141	hyper	9
chr17	3989287	3990287	11	-0.275064	0.634054	0.909118	0.0469496	hypo	9
chr17	8837885	8838104	6	-0.274911	0.472763	0.747674	0.0466746	hypo	9
chr2	102312865	102312875	3	0.274813	0.837088	0.562275	0.0518725	hyper	9
chr5	133375176	133375457	13	-0.274768	0.315027	0.589795	0.0486655	hypo	9
chr11	1507424	1507585	7	0.274669	0.912944	0.638276	0.0537152	hyper	9
chr10	12164173	12164995	13	-0.274656	0.177987	0.452643	0.0540175	hypo	9
chr18	77868528	77868611	3	-0.274538	0.578537	0.853075	0.0505214	hypo	9
chr14	89066128	89066829	11	-0.274414	0.437677	0.712091	0.0497452	hypo	9
chr20	30201168	30201208	5	0.274163	0.698198	0.424035	0.0622505	hyper	9
chr6	157885857	157886117	7	-0.274099	0.554639	0.828738	0.0481634	hypo	9
chr2	139231779	139231915	3	-0.274061	0.462925	0.736986	0.0472459	hypo	9
chr3	127843106	127843153	3	-0.274036	0.50255	0.776586	0.0403762	hypo	9
chr11	9687106	9687346	3	-0.274012	0.411032	0.685044	0.0494845	hypo	9
chr5	79286030	79286224	4	0.273972	0.668295	0.394323	0.0476344	hyper	9
chr20	47400500	47401017	6	-0.273857	0.37625	0.650107	0.0491867	hypo	9
chr19	47735741	47735882	5	-0.273833	0.365161	0.638995	0.0528895	hypo	9
chr1	159897658	159897839	5	-0.273828	0.646062	0.91989	0.0510951	hypo	9
chr8	131087445	131087899	6	-0.27374	0.660437	0.934177	0.0478342	hypo	9
chr10	75691581	75692270	6	-0.273705	0.496877	0.770582	0.0489973	hypo	9
chr16	56909431	56909711	3	-0.273589	0.61954	0.893129	0.0476149	hypo	9
chr15	38855364	38855542	3	-0.273534	0.624713	0.898247	0.0592453	hypo	9
chr15	52553744	52554399	8	-0.273251	0.27668	0.549931	0.0483504	hypo	9
chr12	76423415	76423490	3	-0.273113	0.29112	0.564233	0.0482743	hypo	9
chr15	41877383	41877413	3	0.273099	0.613116	0.340017	0.0480836	hyper	9
chr2	85152457	85152564	3	0.272825	0.721429	0.448605	0.0579452	hyper	9
chr4	25237243	25237596	6	-0.272823	0.390597	0.663419	0.0518164	hypo	9
chr1	12475768	12475980	3	-0.272822	0.587411	0.860233	0.0430043	hypo	9
chr20	34481661	34482094	6	-0.27278	0.609739	0.882519	0.0484662	hypo	9
chr2	139233057	139233175	4	-0.272711	0.397263	0.669973	0.0472459	hypo	9
chr17	27347387	27347735	6	0.272654	0.667741	0.395087	0.0543206	hyper	9
chr17	58156912	58156978	3	-0.272185	0.395255	0.667439	0.0504553	hypo	9
chr17	55353598	55353828	5	-0.271925	0.633881	0.905807	0.0488707	hypo	9
chr17	73749375	73749516	4	-0.271765	0.247943	0.519708	0.0533036	hypo	9
chr2	231789502	231789845	6	-0.271522	0.248947	0.52047	0.0481285	hypo	9
chr2	16690208	16690386	3	0.271476	0.891524	0.620049	0.0527114	hyper	9
chr3	44519572	44519696	4	-0.271336	0.496359	0.767695	0.0455444	hypo	9
chr9	113020680	113021028	4	-0.271294	0.562098	0.833392	0.0522811	hypo	9
chr3	156533840	156533893	4	-0.270645	0.332934	0.60358	0.0537893	hypo	9
chr2	202122061	202122474	6	0.270586	0.471902	0.201316	0.0432473	hyper	9
chr9	2019416	2019521	3	-0.270412	0.162647	0.433059	0.0487368	hypo	9
chr6	42869039	42869507	8	-0.270003	0.0894492	0.359452	0.0578311	hypo	9
chr4	26374578	26374883	4	0.269351	0.719997	0.450646	0.0430727	hyper	9
chr8	103822335	103822457	4	-0.269208	0.431949	0.701157	0.0547033	hypo	9
chr16	66887372	66887420	4	-0.268949	0.516388	0.785337	0.0521246	hypo	9
chr18	3624898	3625030	5	-0.268914	0.383262	0.652176	0.05194	hypo	9
chr2	8549000	8550010	12	-0.268868	0.4974	0.766267	0.0415554	hypo	9
chr13	29126200	29126280	3	-0.268816	0.557844	0.82666	0.0409863	hypo	9
chr8	123795862	123795915	3	-0.268394	0.372322	0.640716	0.0517268	hypo	9
chr5	68564695	68564884	5	-0.268104	0.644441	0.912545	0.0492724	hypo	9
chr21	37401276	37401463	5	-0.268104	0.358208	0.626312	0.0505482	hypo	9
chr10	96367404	96367704	9	-0.268066	0.645202	0.913268	0.047585	hypo	9
chr2	162270723	162270795	3	-0.267925	0.267022	0.534947	0.0419736	hypo	9
chr10	49894605	49894987	4	-0.267783	0.400418	0.668201	0.0489911	hypo	9
chr9	130007020	130007119	6	0.267654	0.598613	0.330959	0.0485156	hyper	9
chr19	7928976	7929182	7	-0.267514	0.515459	0.782973	0.0569941	hypo	9
chr1	32986814	32986995	4	0.267401	0.647913	0.380512	0.053517	hyper	9
chr7	106814609	106814646	3	-0.267374	0.554139	0.821513	0.0506178	hypo	9
chr6	64306897	64307295	3	-0.26734	0.528979	0.796319	0.0483142	hypo	9
chr14	65928952	65929361	4	-0.267202	0.510633	0.777834	0.0458016	hypo	9
chr13	21124673	21125180	9	-0.26718	0.59782	0.865	0.0414562	hypo	9
chr11	119456270	119456314	3	-0.266819	0.452221	0.71904	0.0480756	hypo	9
chr2	233951824	233952281	9	-0.26661	0.283402	0.550011	0.0503549	hypo	9
chr1	9722966	9723203	8	-0.266567	0.589474	0.856042	0.04497	hypo	9
chr2	9984622	9984810	3	-0.266556	0.456386	0.722942	0.0483456	hypo	9
chr11	94279194	94279299	5	-0.266506	0.702307	0.968814	0.0513904	hypo	9
chr4	89206594	89206754	4	-0.266452	0.234971	0.501423	0.0424248	hypo	9
chr15	51385420	51385697	7	0.266366	0.572368	0.306002	0.0470011	hyper	9
chr8	66750110	66750199	3	-0.266218	0.415517	0.681735	0.048429	hypo	9
chr1	12128352	12128827	7	-0.266129	0.454942	0.721071	0.0495184	hypo	9
chr17	78884050	78884098	3	-0.266064	0.400116	0.66618	0.0582561	hypo	9
chr5	138923790	138924018	5	-0.265957	0.634202	0.900159	0.0436168	hypo	9
chr12	124422392	124422452	3	-0.265906	0.225238	0.491145	0.0441919	hypo	9
chr18	10033270	10033318	3	-0.265898	0.558921	0.824818	0.0473514	hypo	9
chr16	31188682	31188906	7	-0.26574	0.468096	0.733837	0.0535373	hypo	9
chr3	183649020	183649524	9	0.265703	0.92423	0.658527	0.0428552	hyper	9
chr3	9903896	9903957	4	-0.265636	0.496785	0.762422	0.0442181	hypo	9
chr10	44500390	44500491	5	-0.265517	0.541122	0.806639	0.0499196	hypo	9
chr13	26827715	26827750	4	0.265449	0.565435	0.299987	0.0492718	hyper	9
chr16	56672817	56672950	4	-0.265198	0.588139	0.853337	0.0531564	hypo	9
chr3	12597357	12597441	4	0.265186	0.788275	0.523089	0.0504154	hyper	9
chr16	58529067	58529531	9	-0.265021	0.312461	0.577482	0.0525511	hypo	9
chr7	99035826	99035881	3	-0.264925	0.460623	0.725548	0.0541117	hypo	9
chr9	90150679	90151277	8	-0.264792	0.473134	0.737926	0.0497046	hypo	9
chr17	43189501	43189622	4	0.26477	0.558397	0.293627	0.0529163	hyper	9
chr6	34663155	34663277	5	-0.264622	0.285001	0.549623	0.0514637	hypo	9
chr2	216876969	216877126	3	-0.264608	0.333414	0.598022	0.0474509	hypo	9
chr6	31671485	31671505	4	-0.264534	0.215745	0.480279	0.0514867	hypo	9
chr2	122534949	122535134	4	-0.264499	0.616712	0.881211	0.0467788	hypo	9
chr12	104188475	104188719	3	-0.264234	0.592439	0.856673	0.0468809	hypo	9
chr3	112282031	112282204	4	-0.264079	0.493837	0.757916	0.0443302	hypo	9
chr16	68309946	68310094	3	-0.264046	0.462058	0.726104	0.0463708	hypo	9
chr20	60824043	60824245	4	-0.263982	0.543041	0.807023	0.0459977	hypo	9
chr8	134544024	134544512	10	-0.263812	0.312809	0.576621	0.0450338	hypo	9
chr17	58754260	58754318	3	-0.263591	0.368994	0.632585	0.0471062	hypo	9
chr6	90681440	90681573	5	-0.263476	0.559068	0.822544	0.044547	hypo	9
chr2	165595773	165596018	3	-0.263066	0.382617	0.645683	0.0471887	hypo	9
chr5	167914349	167914471	4	-0.26296	0.318144	0.581104	0.0483862	hypo	9
chr6	9399012	9399449	23	-0.2629	0.323762	0.586662	0.0528772	hypo	3
chr17	8838485	8838526	3	-0.262885	0.444143	0.707028	0.047348	hypo	9
chr7	129426628	129427008	8	0.262857	0.630613	0.367756	0.0498334	hyper	9
chr8	11659467	11659683	6	-0.262841	0.376371	0.639211	0.0520155	hypo	9
chr19	52597986	52598003	3	0.262747	0.667939	0.405193	0.0547594	hyper	9
chr8	144599766	144600072	3	0.2626	0.828248	0.565648	0.0595947	hyper	9
chr10	89265933	89266035	4	-0.262566	0.425968	0.688534	0.0493748	hypo	9
chr17	47655364	47655661	3	-0.262441	0.475008	0.73745	0.0559561	hypo	9
chr17	64360653	64361457	14	-0.26218	0.450304	0.712484	0.0448774	hypo	9
chr2	96922249	96922514	3	0.262052	0.616761	0.354709	0.0630547	hyper	9
chr4	24913842	24913988	4	0.262014	0.71256	0.450546	0.0570947	hyper	9
chr1	160423430	160423746	8	-0.261829	0.385347	0.647176	0.0452084	hypo	9
chr6	143382546	143382608	3	-0.261827	0.418724	0.680551	0.0461531	hypo	9
chr13	45009200	45009258	3	-0.26178	0.0702441	0.332025	0.0528967	hypo	9
chr6	35992685	35992791	3	0.261509	0.792867	0.531358	0.0578473	hyper	9
chr3	139652908	139653162	3	0.261321	0.643649	0.382327	0.0468924	hyper	9
chr11	64815784	64815831	3	-0.261141	0.435614	0.696755	0.0545172	hypo	9
chr22	41295370	41295607	4	-0.261135	0.471826	0.73296	0.050369	hypo	9
chr2	203130074	203130139	4	-0.261069	0.0306863	0.291756	0.0439266	hypo	9
chr22	20024897	20025010	4	-0.260871	0.582782	0.843653	0.0485801	hypo	9
chr9	128423006	128423075	5	-0.260855	0.667373	0.928228	0.0462799	hypo	9
chr5	43557866	43557963	3	-0.260854	0.364757	0.625611	0.0507007	hypo	9
chr17	54992795	54992889	3	-0.260727	0.520884	0.781611	0.0510073	hypo	9
chr2	38265332	38265432	9	-0.260727	0.191227	0.451954	0.0541051	hypo	9
chr19	6425669	6425679	3	-0.260726	0.113786	0.374512	0.0544513	hypo	9
chr1	17468342	17468864	13	-0.26064	0.532461	0.793101	0.0420589	hypo	9
chr7	154796269	154796431	5	-0.260607	0.103605	0.364212	0.0460968	hypo	9
chr3	133525358	133525531	5	-0.260598	0.267255	0.527852	0.0432654	hypo	9
chr11	102469846	102470002	3	-0.26019	0.617407	0.877597	0.0442628	hypo	9
chr4	1237972	1238008	3	-0.260139	0.554773	0.814912	0.0494084	hypo	9
chr2	12877485	12877756	8	0.260123	0.65667	0.396547	0.0484207	hyper	9
chr16	89816138	89816346	6	-0.259902	0.479121	0.739024	0.051281	hypo	9
chr4	71767388	71767407	3	0.259731	0.70781	0.448079	0.0482358	hyper	9
chr1	182395524	182396159	6	-0.259506	0.554332	0.813838	0.0433073	hypo	9
chr14	21683123	21683427	5	-0.259477	0.474693	0.734169	0.0449924	hypo	9
chr11	47845029	47845288	6	0.259443	0.649227	0.389784	0.0516152	hyper	9
chr3	185082335	185082575	3	-0.259421	0.514774	0.774195	0.0468489	hypo	9
chr6	149450415	149450491	3	-0.259275	0.363925	0.6232	0.0484548	hypo	9
chr6	13508963	13509329	7	-0.25904	0.66982	0.92886	0.0461015	hypo	9
chr7	100042328	100042580	7	-0.259024	0.216907	0.475931	0.0487255	hypo	9
chr2	242927373	242927403	3	-0.258967	0.411115	0.670082	0.0505317	hypo	9
chr1	45098504	45098618	5	0.258784	0.773787	0.515003	0.0505062	hyper	9
chr21	44300188	44300309	5	0.25878	0.518703	0.259923	0.0453817	hyper	9
chr7	2966897	2966960	3	-0.258753	0.65834	0.917094	0.0507516	hypo	9
chr2	109253700	109254039	5	-0.258707	0.358531	0.617237	0.0475814	hypo	9
chr11	14912306	14912389	6	-0.258682	0.568203	0.826885	0.0473969	hypo	9
chr1	12139806	12139893	4	-0.258592	0.37138	0.629972	0.0476216	hypo	9
chr11	3664504	3664661	5	0.25857	0.692871	0.434302	0.0577463	hyper	9
chr15	35086352	35086680	3	-0.258528	0.423146	0.681674	0.0492558	hypo	9
chr17	36857300	36857435	3	-0.258401	0.154426	0.412827	0.049361	hypo	9
chr14	52310781	52310991	3	-0.2584	0.478591	0.736992	0.0428891	hypo	9
chr18	7010942	7011517	18	-0.258342	0.450332	0.708673	0.0471903	hypo	7
chr12	112131290	112131983	6	-0.258107	0.681366	0.939472	0.0480248	hypo	9
chr19	3041693	3041744	5	0.257963	0.724612	0.466649	0.0562717	hyper	9
chr6	35744075	35744091	3	-0.257817	0.417402	0.675219	0.0495008	hypo	9
chr11	82707908	82708637	15	-0.257803	0.480469	0.738272	0.045582	hypo	9
chr2	97173450	97173510	5	0.257713	0.708204	0.450491	0.049291	hyper	9
chr1	53392526	53392596	3	0.257592	0.689198	0.431606	0.0516083	hyper	9
chr12	74930744	74930760	4	0.257574	0.72071	0.463136	0.0459208	hyper	9
chr12	46567910	46568185	10	-0.25753	0.435282	0.692812	0.0460065	hypo	9
chr2	183941931	183942179	3	0.25748	0.76766	0.51018	0.0423205	hyper	9
chr7	43528187	43528887	12	-0.257452	0.568977	0.826429	0.0428966	hypo	9
chr12	111178112	111178362	5	-0.257337	0.454395	0.711732	0.0474326	hypo	9
chr7	39992858	39993148	3	-0.257271	0.371351	0.628622	0.0442412	hypo	9
chr19	10678230	10678513	3	0.256995	0.480402	0.223407	0.0499421	hyper	9
chr5	178450178	178450298	6	-0.256876	0.289673	0.546549	0.0470048	hypo	9
chr3	33116017	33116389	5	0.25681	0.678807	0.421997	0.0479235	hyper	9
chr7	148763274	148763313	5	0.256429	0.65209	0.395661	0.0520459	hyper	9
chr9	35070641	35070795	4	-0.256372	0.407871	0.664243	0.0462898	hypo	9
chr15	40835531	40835621	3	-0.256253	0.595839	0.852092	0.0468167	hypo	9
chr17	59528244	59528308	3	-0.255971	0.532012	0.787983	0.0502951	hypo	9
chr15	59062471	59062604	3	-0.255905	0.436982	0.692887	0.0454436	hypo	9
chr3	197560974	197561549	8	-0.255885	0.584246	0.84013	0.0415643	hypo	9
chr2	170431073	170431175	3	-0.255882	0.550625	0.806508	0.044107	hypo	9
chr12	24290759	24291269	12	-0.255881	0.521097	0.776978	0.0450271	hypo	9
chr11	34373473	34373923	4	-0.255854	0.616974	0.872828	0.0466389	hypo	9
chr11	82707162	82707276	3	-0.255722	0.452837	0.708559	0.0455572	hypo	9
chr13	113366920	113367022	6	-0.255413	0.630999	0.886411	0.0502363	hypo	9
chr20	62251284	62251796	8	-0.255402	0.647825	0.903227	0.0452349	hypo	9
chr1	46599370	46599465	3	0.255296	0.459132	0.203836	0.042933	hyper	9
chr2	60869307	60869655	3	0.255236	0.700209	0.444973	0.0485362	hyper	9
chr1	9076381	9076428	3	-0.255142	0.486486	0.741628	0.0493009	hypo	9
chr4	25916253	25916499	7	-0.254762	0.286224	0.540987	0.0436583	hypo	9
chr14	88461098	88461633	8	-0.254714	0.669674	0.924388	0.0427608	hypo	9
chr6	5084493	5084552	6	0.254573	0.465196	0.210622	0.0470123	hyper	9
chr3	49506717	49506963	5	-0.254486	0.448624	0.70311	0.0419303	hypo	9
chr22	18325332	18325471	4	0.254423	0.838673	0.58425	0.0525337	hyper	9
chr19	22966916	22967161	11	0.254381	0.348205	0.0938246	0.0561946	hyper	9
chr3	128907214	128907410	8	0.254281	0.759273	0.504992	0.0601998	hyper	9
chr3	31958411	31958822	8	0.25422	0.648406	0.394186	0.0514167	hyper	9
chr2	100552338	100552799	8	-0.254174	0.585547	0.839721	0.0474291	hypo	9
chr6	170100588	170100755	4	-0.254096	0.532957	0.787054	0.0432457	hypo	9
chr7	128761562	128761718	3	-0.254001	0.454341	0.708342	0.0479213	hypo	9
chr22	37447158	37447306	3	0.253953	0.513062	0.259109	0.0556044	hyper	9
chr9	35080852	35080958	8	0.253936	0.671239	0.417303	0.0507875	hyper	9
chr16	30797491	30797622	5	-0.253805	0.403872	0.657677	0.049255	hypo	9
chr14	55647001	55647474	7	0.253722	0.704107	0.450385	0.0448083	hyper	9
chr9	134497148	134497651	15	-0.253693	0.436957	0.690649	0.0481262	hypo	9
chr12	124917008	124917164	8	-0.253604	0.377236	0.630839	0.0474378	hypo	9
chr5	137184069	137184158	4	-0.253493	0.680447	0.93394	0.0431088	hypo	9
chr5	158307663	158308540	16	-0.253446	0.400024	0.65347	0.0460404	hypo	9
chr18	31019838	31019973	3	0.253428	0.570135	0.316707	0.0525224	hyper	9
chr7	6585234	6585814	11	-0.253279	0.392976	0.646256	0.0454471	hypo	9
chr16	4094122	4094241	3	0.253147	0.837868	0.584721	0.052169	hyper	9
chr12	112450121	112450176	3	-0.253009	0.268674	0.521682	0.0485965	hypo	9
chr19	7538419	7538437	4	0.25237	0.775329	0.522959	0.0537403	hyper	9
chr4	617761	617787	3	-0.252075	0.312969	0.565044	0.0479047	hypo	9
chr5	138782538	138783562	9	-0.251978	0.544988	0.796966	0.0526307	hypo	9
chr12	125425878	125426052	4	0.251912	0.736033	0.48412	0.0459146	hyper	9
chr17	7475079	7475245	3	0.251901	0.635408	0.383507	0.0474549	hyper	9
chr1	182922381	182922389	3	-0.251643	0.251552	0.503195	0.0489485	hypo	9
chr8	42348258	42348317	3	-0.251516	0.639955	0.891472	0.0508116	hypo	9
chr15	79853530	79853750	5	-0.251451	0.645184	0.896635	0.0453968	hypo	9
chr12	122711441	122711502	4	0.251385	0.539691	0.288305	0.0475155	hyper	9
chr6	166749394	166749709	5	-0.251368	0.5324	0.783769	0.051073	hypo	9
chr19	52954829	52954918	6	-0.251197	0.364297	0.615494	0.05683	hypo	9
chr10	71813907	71814057	7	-0.251043	0.384104	0.635147	0.0439265	hypo	9
chr17	78966767	78966816	4	-0.250854	0.485736	0.73659	0.051195	hypo	9
chr15	45490071	45490328	4	-0.250844	0.264328	0.515172	0.0422069	hypo	9
chr11	35683706	35683778	4	-0.250719	0.103705	0.354424	0.0495018	hypo	9
chr1	3565827	3566063	4	-0.250644	0.439242	0.689886	0.0433477	hypo	9
chr1	93552894	93553271	7	-0.250361	0.5794	0.829762	0.0465136	hypo	9
chr5	114598846	114598984	5	-0.250343	0.625246	0.875589	0.0462042	hypo	9
chr16	3029588	3029648	4	0.250336	0.795791	0.545455	0.0496935	hyper	9
chr5	102049502	102049715	6	0.250322	0.579783	0.329461	0.045924	hyper	9
chr4	76933284	76933605	5	-0.250265	0.308082	0.558347	0.0479061	hypo	9
chr14	60618622	60618745	3	-0.25011	0.625527	0.875637	0.0415741	hypo	9
chr17	26712412	26712534	5	-0.249933	0.261736	0.511669	0.0474328	hypo	9
chr1	160055502	160055696	3	0.249876	0.749067	0.499191	0.0536884	hyper	9
chr2	179277780	179278017	4	-0.249827	0.395981	0.645808	0.0431575	hypo	9
chr12	80081625	80081846	3	-0.24975	0.431027	0.680776	0.0489224	hypo	9
chr6	34607025	34607214	4	-0.249745	0.600375	0.85012	0.0446537	hypo	9
chr15	75181724	75181929	6	0.249731	0.561728	0.311996	0.0454136	hyper	9
chr17	47437258	47437495	3	-0.249456	0.412563	0.662018	0.0511608	hypo	9
chr14	38680898	38680980	3	-0.249403	0.16492	0.414323	0.0556844	hypo	9
chr15	102191612	102191723	4	-0.249335	0.200996	0.45033	0.0444101	hypo	9
chr6	471341	471476	5	-0.249289	0.310413	0.559702	0.0511712	hypo	9
chr9	15422208	15422353	7	0.249117	0.601553	0.352436	0.0539228	hyper	9
chr2	128417322	128417568	4	0.248917	0.749507	0.50059	0.0531435	hyper	9
chr20	34686081	34686466	4	0.248877	0.676076	0.427199	0.0511023	hyper	9
chr13	25875133	25875172	5	0.248833	0.519203	0.270371	0.0513754	hyper	9
chr13	23301156	23301271	4	0.248688	0.631049	0.382361	0.0529034	hyper	9
chr17	17141648	17141789	6	-0.24851	0.477693	0.726203	0.0469355	hypo	9
chr2	59295315	59295726	3	-0.248409	0.624358	0.872767	0.0419504	hypo	9
chr6	149449781	149450041	4	-0.248285	0.354268	0.602553	0.0480297	hypo	9
chr21	35747281	35747470	10	0.248103	0.63397	0.385867	0.0519991	hyper	9
chr6	160427309	160427471	8	-0.247886	0.297754	0.545639	0.0515062	hypo	9
chr8	17519957	17520105	5	-0.247651	0.271267	0.518918	0.053329	hypo	9
chr1	156066327	156066365	4	0.247524	0.6633	0.415776	0.0521503	hyper	9
chr4	166247584	166247807	4	-0.247454	0.317144	0.564598	0.0425174	hypo	9
chr4	159643448	159643496	4	-0.247393	0.501664	0.749056	0.0427921	hypo	9
chr4	82388723	82388903	3	-0.247393	0.375477	0.622869	0.0432406	hypo	9
chr5	102897293	102897515	4	-0.24726	0.45913	0.70639	0.0506602	hypo	9
chr1	167650903	167651362	7	-0.247041	0.635008	0.882049	0.0453112	hypo	9
chr16	31580150	31580159	3	0.247012	0.427157	0.180145	0.0543159	hyper	9
chr11	47197402	47197419	3	0.246777	0.65942	0.412643	0.0473765	hyper	9
chr1	16068547	16069090	6	-0.246534	0.420874	0.667408	0.0427099	hypo	9
chr3	5064645	5064999	8	-0.246465	0.677579	0.924044	0.0457516	hypo	9
chr19	1865278	1865291	3	-0.246094	0.558872	0.804966	0.0500402	hypo	9
chr2	20441568	20441762	4	-0.245982	0.367875	0.613857	0.0476241	hypo	9
chr3	42002146	42002230	3	-0.245831	0.531774	0.777606	0.0444727	hypo	9
chr1	160989316	160989370	4	0.245829	0.810806	0.564977	0.0515173	hyper	9
chr2	74531702	74532107	5	-0.245821	0.646726	0.892548	0.0432794	hypo	9
chr20	3741267	3741356	4	0.245547	0.925304	0.679756	0.0559728	hyper	9
chr6	24774488	24774630	4	0.245467	0.690103	0.444637	0.0440168	hyper	9
chr7	68959118	68959206	3	-0.245423	0.193447	0.438869	0.0469923	hypo	9
chr18	46501335	46501429	11	0.245336	0.594848	0.349512	0.0572703	hyper	9
chr5	133313281	133313466	4	-0.245291	0.644746	0.890037	0.0423004	hypo	9
chr1	43149938	43149980	3	0.245154	0.672303	0.42715	0.0512607	hyper	9
chr16	66542579	66542767	6	-0.244992	0.621524	0.866516	0.0454276	hypo	9
chr6	26088775	26088854	4	0.244978	0.736456	0.491477	0.0476453	hyper	9
chr5	140045179	140045237	4	-0.244928	0.379969	0.624898	0.0454083	hypo	9
chr8	53625542	53625766	3	-0.244926	0.182909	0.427835	0.0437726	hypo	9
chr11	73499663	73499768	5	0.244805	0.488157	0.243352	0.0551743	hyper	9
chr9	93954342	93954625	7	-0.244421	0.331087	0.575508	0.0458612	hypo	9
chr1	159143310	159143586	3	-0.244345	0.422776	0.667121	0.0438669	hypo	9
chr6	105849886	105849983	3	-0.2443	0.54634	0.79064	0.0457922	hypo	9
chr1	221401981	221402177	4	-0.244295	0.445526	0.689821	0.0480734	hypo	9
chr9	130461272	130461460	9	0.244181	0.512261	0.268081	0.0508741	hyper	9
chr1	35528295	35528549	3	0.244131	0.667693	0.423561	0.0515107	hyper	9
chr15	74314100	74314257	3	0.244037	0.731381	0.487345	0.0478982	hyper	9
chr6	106189044	106189330	7	0.243722	0.791313	0.547591	0.0457018	hyper	9
chr5	142593453	142593639	5	-0.24361	0.538981	0.78259	0.0441969	hypo	9
chr9	33043739	33043800	4	0.243223	0.503881	0.260659	0.0515545	hyper	9
chr2	153513272	153513748	8	-0.243096	0.664162	0.907258	0.0427704	hypo	9
chr12	108953355	108953539	5	0.243094	0.875641	0.632547	0.0499646	hyper	9
chr2	9769469	9769748	4	-0.243048	0.313945	0.556993	0.0414756	hypo	9
chr21	34468832	34468863	3	0.242857	0.672895	0.430038	0.0525485	hyper	9
chr16	66969362	66969408	4	-0.242751	0.273033	0.515785	0.0521641	hypo	9
chr8	95940943	95941399	7	-0.242582	0.632605	0.875187	0.0447293	hypo	9
chr6	134562256	134562348	3	-0.242518	0.560267	0.802786	0.0470766	hypo	9
chr5	133448757	133448843	3	0.242511	0.664672	0.422161	0.0503739	hyper	9
chr1	156251159	156251280	5	-0.2424	0.317752	0.560152	0.0454443	hypo	9
chr1	21501370	21501578	3	-0.242391	0.351473	0.593864	0.0438436	hypo	9
chr6	73450836	73451161	3	-0.242292	0.540073	0.782365	0.0455289	hypo	9
chr13	48575919	48575948	5	-0.242216	0.486187	0.728403	0.0530549	hypo	9
chr1	178007511	178007529	3	-0.242204	0.422051	0.664255	0.0468267	hypo	9
chr16	56958530	56958757	3	0.242201	0.832016	0.589815	0.050102	hyper	9
chr22	37872590	37872811	6	0.242135	0.790116	0.547982	0.0532288	hyper	9
chr16	53145156	53145386	3	-0.241766	0.689036	0.930802	0.0449417	hypo	9
chr2	237421691	237422025	6	-0.241654	0.512065	0.753719	0.044196	hypo	9
chr6	117003405	117003476	6	0.24157	0.435732	0.194162	0.0525993	hyper	9
chr14	105862725	105862773	3	-0.241338	0.718242	0.95958	0.047544	hypo	9
chr9	131126817	131126857	3	0.241274	0.774947	0.533673	0.0519327	hyper	9
chr13	26626614	26626755	5	0.240937	0.748638	0.507701	0.0561633	hyper	9
chr9	128030839	128031142	5	-0.240849	0.630515	0.871364	0.0461345	hypo	9
chr6	117997655	117997728	7	-0.240807	0.304877	0.545683	0.0466164	hypo	9
chr20	48236028	48236909	5	-0.240634	0.441802	0.682435	0.0469771	hypo	9
chr11	46264202	46264406	5	0.240475	0.773621	0.533145	0.0498369	hyper	9
chr5	58187657	58187775	5	-0.240462	0.423293	0.663755	0.0477288	hypo	9
chr6	168767355	168767485	4	0.24046	0.744302	0.503842	0.0575415	hyper	9
chr5	137910011	137910200	5	-0.240247	0.200598	0.440846	0.0426059	hypo	9
chr3	43934984	43935160	3	0.240194	0.672165	0.431971	0.0482992	hyper	9
chr3	188634406	188634637	6	-0.240104	0.588682	0.828786	0.039904	hypo	9
chr14	105486199	105486339	8	-0.240065	0.462299	0.702365	0.0449521	hypo	9
chr3	52231725	52231755	3	-0.239981	0.381047	0.621028	0.0451242	hypo	9
chr16	4453132	4453156	3	-0.239882	0.572252	0.812133	0.0492407	hypo	9
chr4	2555541	2555574	3	-0.2397	0.563676	0.803375	0.0445756	hypo	9
chr14	103031845	103032131	5	-0.239223	0.397451	0.636675	0.0466235	hypo	9
chr4	26195224	26195917	7	-0.239039	0.573074	0.812113	0.0463814	hypo	9
chr5	118409551	118409699	3	-0.238883	0.627472	0.866355	0.0479027	hypo	9
chr17	55037612	55037777	4	0.238652	0.699409	0.460758	0.0534968	hyper	9
chr10	13483060	13483086	4	0.238329	0.816044	0.577715	0.0465333	hyper	9
chr17	72231313	72231383	4	0.238072	0.38661	0.148538	0.0573197	hyper	9
chr2	26402793	26403138	7	0.237985	0.634599	0.396615	0.0436194	hyper	9
chr19	38909183	38909280	3	0.237959	0.754237	0.516277	0.0543656	hyper	9
chr7	157204522	157204545	3	0.237857	0.915621	0.677764	0.0467502	hyper	9
chr6	74247553	74248002	8	-0.23765	0.654166	0.891816	0.0429258	hypo	9
chr17	41594849	41595422	6	-0.237113	0.552256	0.789369	0.0449644	hypo	9
chr18	33766493	33766516	4	-0.237057	0.319331	0.556387	0.0465861	hypo	9
chr15	99416148	99417175	10	-0.236856	0.486561	0.723417	0.0436585	hypo	9
chr20	55097553	55097824	6	-0.236815	0.609462	0.846277	0.0466295	hypo	9
chr2	86300592	86300861	4	-0.23657	0.615949	0.852519	0.0435389	hypo	9
chr2	121044806	121045411	8	-0.236505	0.484402	0.720907	0.0431872	hypo	9
chr2	69967974	69968202	3	0.236468	0.482246	0.245778	0.0460984	hyper	9
chr16	30418067	30418083	4	0.23634	0.733474	0.497134	0.0530227	hyper	9
chr12	6735905	6735980	4	0.236337	0.729451	0.493114	0.0499718	hyper	9
chr18	12998806	12999015	3	-0.236321	0.538085	0.774407	0.0423172	hypo	9
chr6	10660432	10660449	4	-0.236236	0.619905	0.856141	0.0469639	hypo	9
chr1	228269264	228269347	4	-0.236234	0.387045	0.623278	0.0469015	hypo	9
chr20	62773838	62773912	3	0.236143	0.702267	0.466125	0.0503969	hyper	9
chr15	42075277	42075327	3	0.23585	0.566108	0.330258	0.044531	hyper	9
chr8	131021014	131021378	4	-0.235805	0.563202	0.799007	0.042921	hypo	9
chr19	52900425	52900518	3	0.235641	0.639099	0.403458	0.0539709	hyper	9
chr17	40687596	40687653	5	-0.235467	0.597319	0.832786	0.0529864	hypo	9
chr12	53811267	53811678	9	0.235189	0.817379	0.582189	0.0489511	hyper	9
chr6	252503	252627	3	-0.235082	0.535735	0.770817	0.0471746	hypo	9
chr6	53225322	53225448	6	0.235023	0.875837	0.640814	0.0429772	hyper	9
chr5	178978704	178978809	5	-0.234925	0.423003	0.657928	0.0486987	hypo	9
chr16	285874	285889	4	-0.23489	0.609151	0.844042	0.0448349	hypo	9
chr17	74141065	74141135	3	0.234706	0.727096	0.49239	0.0504638	hyper	9
chr6	90735602	90736017	5	-0.234584	0.602181	0.836765	0.0438084	hypo	9
chr17	25707085	25707572	7	0.234552	0.67815	0.443599	0.0481126	hyper	9
chr14	23288872	23289038	5	-0.234429	0.319031	0.55346	0.043811	hypo	9
chr7	87256534	87256700	3	0.234422	0.798617	0.564195	0.0442227	hyper	9
chr1	44678191	44678477	3	-0.234418	0.570184	0.804602	0.0443651	hypo	9
chr13	37007250	37007372	4	-0.234336	0.355906	0.590242	0.0437335	hypo	9
chr11	102961555	102961572	3	0.234269	0.8797	0.645431	0.053581	hyper	9
chr12	117470015	117470160	3	0.233938	0.631917	0.397979	0.0479937	hyper	9
chr2	198297414	198297538	6	0.233702	0.667007	0.433304	0.0477721	hyper	9
chr7	73157449	73157619	8	0.233658	0.617131	0.383473	0.0500287	hyper	9
chr16	84887065	84887336	9	-0.233624	0.478646	0.71227	0.0480314	hypo	9
chr1	156863914	156864207	4	-0.233558	0.296562	0.53012	0.0503063	hypo	9
chr9	131036816	131036875	3	-0.233553	0.682885	0.916438	0.0430953	hypo	9
chr2	207306995	207307001	4	0.233458	0.600652	0.367194	0.0469479	hyper	9
chr22	42573472	42573582	3	-0.233006	0.663866	0.896871	0.0471621	hypo	9
chr11	10323911	10323917	3	0.232913	0.662914	0.430001	0.0530259	hyper	9
chr5	122847316	122847427	3	0.232817	0.731305	0.498488	0.0452022	hyper	9
chr7	92218431	92218462	4	0.232563	0.796591	0.564028	0.048188	hyper	9
chr12	111474954	111475009	6	0.232542	0.542292	0.30975	0.0537563	hyper	9
chr1	246175375	246175523	3	-0.232501	0.572398	0.804899	0.0439471	hypo	9
chr3	169966353	169966450	3	-0.23247	0.589515	0.821985	0.0431392	hypo	9
chr4	8236935	8237108	4	-0.232384	0.598262	0.830646	0.0422908	hypo	9
chr12	125033504	125033568	5	-0.232234	0.426253	0.658487	0.0551114	hypo	9
chr13	30707031	30707100	5	-0.232224	0.136146	0.36837	0.0431911	hypo	9
chr2	230788089	230788133	3	-0.232152	0.456709	0.688861	0.0437438	hypo	9
chr3	53807813	53808574	14	-0.232027	0.613545	0.845572	0.040399	hypo	9
chr5	145316598	145317086	6	0.231894	0.675437	0.443543	0.0442535	hyper	9
chr17	17379832	17379841	3	0.23177	0.749606	0.517836	0.0473707	hyper	9
chr6	33379482	33379677	5	-0.23148	0.551276	0.782756	0.0470041	hypo	9
chr10	43914018	43914024	3	0.231431	0.799093	0.567663	0.0520087	hyper	9
chr5	134181178	134181241	3	0.231222	0.407242	0.17602	0.0462243	hyper	9
chr15	42207794	42208218	5	-0.231143	0.537534	0.768677	0.0432327	hypo	9
chr13	113242968	113243049	5	-0.231094	0.475584	0.706678	0.0484992	hypo	9
chr1	17293891	17293971	4	-0.230947	0.581739	0.812687	0.0459204	hypo	9
chr2	3281034	3281169	7	0.230565	0.912325	0.681761	0.0443046	hyper	9
chr14	103284964	103285055	4	-0.230224	0.642536	0.87276	0.0417008	hypo	9
chr2	148603859	148604230	7	-0.230058	0.178217	0.408275	0.042513	hypo	9
chr3	177079330	177079580	6	0.229883	0.621909	0.392026	0.042001	hyper	9
chr2	106775834	106776212	5	-0.229874	0.328189	0.558064	0.0476098	hypo	9
chr2	24308274	24308347	4	-0.229705	0.467331	0.697036	0.0431765	hypo	9
chr3	187454786	187454937	5	0.229696	0.790003	0.560308	0.0419681	hyper	9
chr6	14626069	14626386	5	-0.229462	0.661082	0.890544	0.0432578	hypo	9
chr7	128002548	128002715	4	0.22937	0.716043	0.486673	0.0448239	hyper	9
chr3	9774670	9774729	5	0.229356	0.663003	0.433647	0.0496773	hyper	9
chr7	73623468	73623679	6	0.229285	0.657459	0.428174	0.0447577	hyper	9
chr5	459680	459733	3	-0.228764	0.610368	0.839132	0.0459343	hypo	9
chr10	127409666	127409845	4	-0.22872	0.678377	0.907097	0.0451835	hypo	9
chr1	53965130	53965254	4	0.228566	0.645852	0.417286	0.0505591	hyper	9
chr3	60080613	60081323	10	0.228442	0.626678	0.398236	0.0451677	hyper	9
chr14	105856393	105856932	11	0.22824	0.402134	0.173894	0.0477458	hyper	9
chr2	383696	384245	9	-0.227932	0.536978	0.764909	0.0442317	hypo	9
chr1	110625683	110625842	3	0.227437	0.412876	0.185438	0.0469826	hyper	9
chr10	74409223	74409320	4	0.227252	0.78032	0.553068	0.0442213	hyper	9
chr12	123450346	123450365	3	0.227232	0.7302	0.502968	0.0521662	hyper	9
chr3	124606907	124606923	3	-0.227085	0.534594	0.761679	0.0435333	hypo	9
chr1	153893400	153893465	3	-0.226842	0.267184	0.494026	0.0459422	hypo	9
chr2	48666269	48666420	7	0.226768	0.861578	0.634811	0.042427	hyper	9
chr11	68123164	68123247	4	-0.226712	0.582613	0.809325	0.0459956	hypo	9
chr14	57285170	57285244	3	0.22667	0.596933	0.370263	0.0440277	hyper	9
chr17	74779391	74779662	5	0.226408	0.718744	0.492335	0.0475001	hyper	9
chr16	13164372	13164748	8	0.226054	0.588195	0.362142	0.0525388	hyper	9
chr7	39647864	39648061	3	0.225968	0.735538	0.50957	0.0465738	hyper	9
chr6	52172263	52172462	4	0.225083	0.63155	0.406467	0.0518883	hyper	9
chr3	128746520	128746596	5	0.224947	0.756475	0.531528	0.0534471	hyper	9
chr11	67375072	67375146	4	0.22485	0.757234	0.532385	0.0473748	hyper	9
chr17	73148924	73149199	4	0.224495	0.685756	0.461262	0.0481115	hyper	9
chr3	189839082	189839197	6	-0.224219	0.401116	0.625335	0.0468968	hypo	9
chr6	33636675	33636888	6	-0.223473	0.5814	0.804873	0.0452781	hypo	9
chr5	172553463	172553661	3	-0.223452	0.669687	0.893139	0.0442366	hypo	9
chr19	10827783	10827816	4	0.223399	0.562939	0.339541	0.0530773	hyper	9
chr18	60381879	60381922	3	0.223235	0.770078	0.546842	0.0412964	hyper	9
chr1	155828558	155828645	8	0.222287	0.663008	0.440721	0.0503555	hyper	9
chr1	51465708	51465949	3	0.22215	0.617043	0.394892	0.0473301	hyper	9
chr13	51795367	51795550	4	0.221917	0.687104	0.465187	0.0519287	hyper	9
chr1	244978013	244978246	4	-0.221878	0.328855	0.550733	0.0461774	hypo	9
chr10	88470656	88470720	3	0.221816	0.863734	0.641918	0.0492775	hyper	9
chr13	21278852	21278949	5	-0.221619	0.404773	0.626392	0.0437112	hypo	9
chr13	99134791	99134964	5	-0.221303	0.65365	0.874953	0.0446159	hypo	9
chr2	196466010	196466333	5	0.221188	0.548031	0.326843	0.0434356	hyper	9
chr14	73254991	73255216	3	-0.221155	0.610669	0.831824	0.0431633	hypo	9
chr5	172572352	172572427	3	0.220984	0.522503	0.301518	0.0484613	hyper	9
chr1	6238748	6238955	4	-0.220348	0.478277	0.698624	0.0468793	hypo	9
chr2	120130337	120130812	8	0.220177	0.909963	0.689786	0.0446268	hyper	9
chr9	107525917	107525934	4	0.220124	0.726705	0.506581	0.049642	hyper	9
chr14	105338941	105338977	3	-0.219521	0.283539	0.50306	0.0472852	hypo	9
chr9	133741791	133741903	3	0.219246	0.852385	0.633139	0.0470036	hyper	9
chr15	35088160	35088261	3	0.218985	0.655595	0.43661	0.0473031	hyper	9
chr2	9781546	9781875	4	-0.218727	0.563654	0.782381	0.041452	hypo	9
chr3	58173440	58173691	5	-0.218657	0.380877	0.599535	0.0433972	hypo	9
chr12	4919526	4919602	5	0.218607	0.471755	0.253147	0.0546476	hyper	9
chr4	3444592	3444616	3	0.218547	0.88161	0.663063	0.0515754	hyper	9
chr1	244080045	244080219	9	0.21823	0.620273	0.402044	0.0512832	hyper	9
chr5	175597258	175597523	3	0.218164	0.823857	0.605693	0.0421848	hyper	9
chr7	74013637	74013779	4	-0.218086	0.649491	0.867577	0.044152	hypo	9
chr13	101158536	101158730	6	0.217782	0.650019	0.432237	0.0452555	hyper	9
chr1	46891339	46891611	4	-0.217526	0.589036	0.806562	0.0426712	hypo	9
chr2	15700103	15700323	4	-0.217377	0.326815	0.544192	0.0413716	hypo	9
chr12	7052445	7052496	4	-0.21714	0.472183	0.689323	0.0458344	hypo	9
chr2	62080266	62080336	7	0.217013	0.669694	0.452681	0.0493721	hyper	9
chr1	206809924	206810133	3	0.216743	0.560249	0.343506	0.0439247	hyper	9
chr19	19648555	19648694	3	0.216557	0.442813	0.226256	0.0518387	hyper	9
chr8	41654876	41654921	5	0.216551	0.568326	0.351775	0.0472948	hyper	9
chr17	80204447	80204477	3	0.216238	0.851923	0.635685	0.0473123	hyper	9
chr13	25199754	25200141	4	0.216045	0.64877	0.432725	0.0431615	hyper	9
chr7	73638230	73638275	3	0.215938	0.885218	0.66928	0.0479171	hyper	9
chr8	60032900	60033077	8	0.21583	0.64804	0.432209	0.0442872	hyper	9
chr15	50728068	50728371	3	-0.215782	0.740195	0.955978	0.0422663	hypo	9
chr18	8611157	8611339	3	-0.215747	0.514958	0.730705	0.0419366	hypo	9
chr1	87598372	87598514	10	0.215731	0.53483	0.319099	0.0486338	hyper	9
chr3	56928082	56928325	4	-0.215663	0.458839	0.674502	0.0440625	hypo	9
chr1	227729540	227729552	4	0.215352	0.734989	0.519637	0.0506683	hyper	9
chr7	22521205	22521551	6	-0.214834	0.499323	0.714157	0.0441562	hypo	9
chr1	6652120	6652444	4	0.214108	0.784449	0.570341	0.0486491	hyper	9
chr4	153461557	153461622	3	-0.213935	0.711092	0.925027	0.0419206	hypo	9
chr2	206948146	206948348	3	-0.213362	0.498326	0.711689	0.0410569	hypo	9
chr9	4739879	4739935	3	-0.213069	0.429234	0.642303	0.0457176	hypo	9
chr9	132719066	132719150	3	-0.213027	0.608793	0.821819	0.0440317	hypo	9
chr16	58284600	58284708	3	0.21274	0.693852	0.481112	0.0466079	hyper	9
chr18	46423558	46423769	6	0.21267	0.698675	0.486006	0.048277	hyper	9
chr3	127554094	127554345	6	-0.212136	0.451196	0.663331	0.0434052	hypo	9
chr12	26901893	26902460	5	-0.211881	0.502843	0.714724	0.0429397	hypo	9
chr3	33318597	33318720	3	0.211463	0.545113	0.33365	0.046079	hyper	9
chr2	65793940	65794266	10	0.211449	0.79349	0.58204	0.0510811	hyper	9
chr17	31256015	31256352	4	0.211143	0.66033	0.449187	0.0489707	hyper	9
chr3	127554836	127554985	3	-0.21091	0.438655	0.649565	0.0433319	hypo	9
chr6	24766581	24767219	8	-0.210173	0.493201	0.703374	0.0440358	hypo	9
chr2	26469332	26469451	6	0.209899	0.858412	0.648513	0.0410075	hyper	9
chr7	1112868	1113014	8	0.209626	0.442144	0.232518	0.0443616	hyper	9
chr3	48955331	48955534	4	0.208917	0.519811	0.310894	0.0415581	hyper	9
chr3	5165187	5165312	4	-0.20885	0.23529	0.44414	0.0441215	hypo	9
chr1	10852619	10852852	5	0.208679	0.39883	0.190152	0.0459699	hyper	9
chr14	23651285	23651359	3	0.208247	0.732704	0.524457	0.0482416	hyper	9
chr21	34785588	34785791	4	0.208101	0.635846	0.427745	0.0441544	hyper	9
chr1	145590194	145590351	5	0.207702	0.625556	0.417854	0.0421605	hyper	9
chr1	235183841	235184214	10	-0.207672	0.33874	0.546412	0.0444502	hypo	9
chr14	92589246	92589322	4	-0.207189	0.355961	0.563149	0.0432807	hypo	9
chr8	10066691	10067255	8	0.206639	0.796796	0.590157	0.0420359	hyper	9
chr6	90206009	90206366	9	-0.206467	0.562073	0.76854	0.0417877	hypo	9
chr14	103307313	103307439	4	-0.205641	0.67194	0.87758	0.0414717	hypo	9
chr12	72149669	72149762	3	0.205334	0.416417	0.211083	0.0438512	hyper	9
chr8	26437640	26437651	3	0.20486	0.737097	0.532237	0.0442006	hyper	9
chr6	710202	710297	5	0.204336	0.820524	0.616189	0.045932	hyper	9
chr13	36268603	36268802	5	0.204116	0.939903	0.735788	0.0423151	hyper	9
chr3	112929668	112929715	8	0.204037	0.763851	0.559814	0.0435589	hyper	9
chr5	172485095	172485306	4	-0.202939	0.376268	0.579207	0.0428419	hypo	9
chr18	60202168	60202406	7	0.201955	0.728169	0.526215	0.0419095	hyper	9
chr17	1855492	1855559	3	0.201856	0.886913	0.685057	0.0457627	hyper	9
chr17	80016945	80017252	5	0.198612	0.876718	0.678106	0.0451481	hyper	9
chr7	100495379	100495429	3	0.197403	0.703762	0.506358	0.0429158	hyper	9
chr2	175357981	175358043	3	0.196873	0.55256	0.355687	0.0455367	hyper	9
chr2	58274980	58275058	3	-0.196642	0.512849	0.709491	0.0406128	hypo	9
chr2	149926645	149927025	6	-0.194581	0.506358	0.70094	0.0410381	hypo	9
chr8	82194158	82194184	3	0.194372	0.656002	0.46163	0.0477033	hyper	9
chr4	7284991	7285049	4	0.194327	0.779546	0.585219	0.0476491	hyper	9
chr15	101587053	101587241	5	-0.193947	0.742671	0.936618	0.0416707	hypo	9
chr1	109632586	109632608	3	0.19374	0.771915	0.578175	0.0433452	hyper	9
chr1	47778723	47778766	4	0.193509	0.673775	0.480266	0.0419445	hyper	9
chr4	89379255	89379370	3	0.192246	0.574927	0.382682	0.0434493	hyper	9
chr7	22006320	22006928	10	0.191792	0.511625	0.319834	0.0463545	hyper	9
chr2	65197197	65197283	3	0.191767	0.832867	0.6411	0.0418314	hyper	9
chr5	179634811	179634925	6	0.191381	0.573994	0.382613	0.0431634	hyper	9
chr10	69932370	69932567	5	0.190842	0.746187	0.555344	0.0457379	hyper	9
chr2	213697899	213697977	9	0.189728	0.927614	0.737887	0.0448694	hyper	9
chr2	88928134	88928186	3	0.189725	0.816754	0.627029	0.0405668	hyper	9
chr3	48849622	48850029	7	0.188926	0.583215	0.394288	0.0424417	hyper	9
chr2	192874832	192875062	5	0.188838	0.791014	0.602176	0.0447486	hyper	9
chr2	73430818	73430956	5	0.18747	0.592729	0.405259	0.0430237	hyper	9
chr6	30456958	30457041	6	0.1857	0.283963	0.0982637	0.0454522	hyper	9
chr5	171057933	171058058	3	0.183305	0.74391	0.560605	0.0423903	hyper	9
chr7	2599503	2599522	3	0.18095	0.673917	0.492967	0.0468368	hyper	9
chr2	85761823	85762080	3	0.177605	0.757223	0.579618	0.0433429	hyper	9
chr5	175561658	175561697	4	-0.172878	0.283144	0.456022	0.0570715	hypo	9
