# Supplementary material for: Large-scale hypomethylated blocks associated with Epstein-Barr virus–induced B-cell immortalization
Source: HighWire-hosted journal article supplement (doi:10.1101/gr.157743.113), 2013-09-25
Supplement: Supplemental_Data3_DEgenes.xlsx [file Supplemental_Data3_DEgenes.xlsx]

## Sheet: Transformation
affyid	logFC	AveExpr	t	P.Value	adj.P.Val	geneSymbol
232151_at	4.30248	5.57346	48.889	6.6757e-12	1.50803e-07	MACC1
243968_x_at	-4.12835	6.93603	-48.6007	7.02617e-12	1.50803e-07	FCRL1
208892_s_at	-6.38355	6.6301	-44.8782	1.39972e-11	1.50803e-07	DUSP6
217979_at	-6.30543	8.41562	-44.7886	1.42412e-11	1.50803e-07	TSPAN13
203642_s_at	-5.88321	7.90984	-44.0587	1.64149e-11	1.50803e-07	COBLL1
1566766_a_at	3.37262	5.77967	44.0173	1.6549e-11	1.50803e-07	MACC1
227006_at	-4.82659	6.6928	-41.2977	2.87181e-11	2.24309e-07	PPP1R14A
1565162_s_at	5.68053	5.10203	39.6118	4.1165e-11	2.81337e-07	MGST1
204059_s_at	4.69692	5.35165	35.965	9.47588e-11	4.54019e-07	ME1
204058_at	3.91944	4.43487	35.7559	9.96474e-11	4.54019e-07	ME1
207469_s_at	4.38561	5.5328	34.5434	1.34183e-10	5.24034e-07	PIR
231736_x_at	4.85895	6.1819	34.2251	1.45333e-10	5.2974e-07	MGST1
203854_at	-3.24668	4.86583	-33.4452	1.77282e-10	5.55308e-07	CFI
224918_x_at	5.67099	5.98031	33.3262	1.82817e-10	5.55308e-07	MGST1
208891_at	-6.17422	7.05576	-32.2054	2.45496e-10	6.42957e-07	DUSP6
235982_at	-3.26216	6.6699	-32.1833	2.46952e-10	6.42957e-07	FCRL1
232737_s_at	-2.65173	4.00481	-31.3071	3.13227e-10	7.78441e-07	ENPP3
208893_s_at	-4.47606	6.78953	-31.1359	3.28371e-10	7.80594e-07	DUSP6
221234_s_at	-6.08757	7.78927	-30.3655	4.07411e-10	9.26966e-07	BACH2
226415_at	-5.79646	6.19114	-30.2263	4.23853e-10	9.26966e-07	VAT1L
235486_at	-3.10724	5.64239	-29.2622	5.60194e-10	1.13439e-06	KIAA1549L
201842_s_at	-3.49067	4.73747	-28.8541	6.32113e-10	1.23431e-06	EFEMP1
238429_at	-6.04038	7.51728	-28.0618	8.03051e-10	1.46356e-06	TMEM71
210138_at	2.97272	4.60253	27.7072	8.95787e-10	1.57991e-06	RGS20
222108_at	-4.45249	6.8476	-27.5102	9.52416e-10	1.60115e-06	AMIGO2
207103_at	4.26345	4.65817	27.4636	9.66403e-10	1.60115e-06	KCND2
203641_s_at	-3.43196	6.46394	-27.1762	1.05778e-09	1.701e-06	COBLL1
200872_at	-4.26691	8.54563	-26.3144	1.39496e-09	2.17549e-06	S100A10
223423_at	4.01816	8.47795	26.2333	1.43242e-09	2.17549e-06	GPR160
228758_at	-2.63926	6.75147	-25.5775	1.77993e-09	2.49532e-06	BCL6
222938_x_at	-2.72463	6.07304	-25.4063	1.88547e-09	2.5772e-06	ENPP3
1553333_at	1.83521	3.79855	25.0562	2.12366e-09	2.83197e-06	MAB21L3
207900_at	-5.96054	8.19576	-24.4735	2.59817e-09	3.3036e-06	CCL17
227798_at	4.29212	5.05284	24.1408	2.92145e-09	3.63023e-06	SMAD1
208944_at	-4.15596	8.2671	-23.8516	3.23901e-09	3.84985e-06	TGFBR2
237546_at	2.614	4.37653	23.6986	3.42247e-09	3.98136e-06	IL19
209242_at	-2.49686	4.52982	-23.6364	3.50033e-09	3.98709e-06	PEG3
236635_at	-2.89172	5.96835	-23.4994	3.67893e-09	4.10501e-06	ZNF667
219874_at	3.76012	5.63304	23.3621	3.86814e-09	4.22981e-06	SLC12A8
231875_at	2.75916	4.74881	23.236	4.05145e-09	4.34339e-06	KIF21A
227193_at	-4.13451	7.40223	-22.7317	4.88781e-09	5.13925e-06	SLC30A4
225602_at	-2.34021	7.17232	-22.1926	6.00088e-09	6.19053e-06	GLIPR2
220565_at	3.34344	5.6396	21.925	6.65621e-09	6.73941e-06	CCR10
204342_at	-3.05003	8.33489	-21.7318	7.17855e-09	7.01634e-06	SLC25A24
204917_s_at	2.4735	6.5064	21.6688	7.35896e-09	7.01634e-06	MLLT3
225613_at	-3.003	6.47541	-21.6629	7.37583e-09	7.01634e-06	MAST4
224811_at	-4.08764	6.99387	-21.4744	7.94721e-09	7.36464e-06	LPP
203221_at	-3.39789	7.64038	-21.3174	8.46076e-09	7.41723e-06	TLE1
204918_s_at	3.40177	5.73376	21.2872	8.56377e-09	7.41723e-06	MLLT3
224891_at	-2.3976	8.48837	-21.2553	8.67396e-09	7.41723e-06	FOXO3
202932_at	2.85889	5.4246	21.2437	8.71461e-09	7.41723e-06	YES1
210135_s_at	-3.10211	4.54902	-21.2344	8.74722e-09	7.41723e-06	SHOX2
226382_at	-2.46577	9.27625	-21.2144	8.81792e-09	7.41723e-06	CAMK1D
214735_at	3.83103	6.06067	21.1025	9.22475e-09	7.64187e-06	IPCEF1
201887_at	-4.61717	8.18371	-21.0063	9.59132e-09	7.82694e-06	IL13RA1
226122_at	-2.86469	8.21717	-20.6781	1.09695e-08	8.72216e-06	PLEKHG1
226017_at	-3.51794	9.00212	-20.6698	1.10074e-08	8.72216e-06	CMTM7
221676_s_at	1.71836	9.10252	20.5014	1.18019e-08	9.21811e-06	CORO1C
217080_s_at	-2.6363	5.52266	-20.3566	1.25369e-08	9.65427e-06	HOMER2
215017_s_at	-4.38944	5.58057	-20.0376	1.43416e-08	1.08907e-05	FNBP1L
213791_at	-2.57677	5.47967	-19.8915	1.52633e-08	1.14132e-05	PENK
207907_at	2.41991	5.66932	19.8635	1.54473e-08	1.14132e-05	TNFSF14
200665_s_at	3.8328	7.06812	19.8052	1.58391e-08	1.14424e-05	SPARC
203130_s_at	-2.75416	6.4492	-19.7363	1.63157e-08	1.14424e-05	KIF5C
217504_at	2.68108	5.15276	19.7351	1.63238e-08	1.14424e-05	ABCA6
212798_s_at	-3.96255	7.27588	-19.4638	1.83642e-08	1.25508e-05	ANKMY2
215933_s_at	-4.72149	7.84332	-19.082	2.17325e-08	1.4423e-05	HHEX
205771_s_at	-2.91146	7.29734	-19.0219	2.23229e-08	1.45298e-05	AKAP7
203607_at	-3.03962	8.04292	-18.9932	2.26106e-08	1.45439e-05	INPP5F
204689_at	-3.861	7.47037	-18.7804	2.48815e-08	1.58185e-05	HHEX
209969_s_at	2.88985	8.72567	18.7227	2.55398e-08	1.60504e-05	STAT1
212741_at	-2.55189	5.73275	-18.644	2.64694e-08	1.62609e-05	MAOA
227812_at	4.67802	5.02107	18.6128	2.68486e-08	1.63105e-05	TNFRSF19
230551_at	-3.1836	5.72164	-18.5781	2.72774e-08	1.63235e-05	KSR2
202949_s_at	2.18092	5.07389	18.5629	2.74671e-08	1.63235e-05	FHL2
223304_at	-3.14993	7.76788	-18.5015	2.82505e-08	1.65463e-05	SLC37A3
207178_s_at	2.48088	4.10311	18.4855	2.84595e-08	1.65463e-05	FRK
235199_at	-2.0835	8.37283	-18.4189	2.93444e-08	1.67126e-05	RNF125
202933_s_at	3.03991	5.94969	18.2612	3.15645e-08	1.77762e-05	YES1
209392_at	3.68352	5.1247	18.241	3.18622e-08	1.77762e-05	ENPP2
205066_s_at	-1.9479	4.84843	-18.1477	3.32786e-08	1.83788e-05	ENPP1
236491_at	3.11738	5.56791	18.1011	3.40107e-08	1.85954e-05	BCL2L10
216804_s_at	1.44497	6.23292	18.0614	3.46495e-08	1.86872e-05	PDLIM5
210715_s_at	-3.41542	8.63519	-17.9766	3.60599e-08	1.89598e-05	SPINT2
238567_at	2.51823	6.07466	17.9763	3.60644e-08	1.89598e-05	SGPP2
227204_at	1.60665	5.66135	17.6977	4.11674e-08	2.07731e-05	PARD6G
203780_at	-2.16651	4.12806	-17.6915	4.12897e-08	2.07731e-05	MPZL2
227481_at	2.40208	4.47928	17.6854	4.14112e-08	2.07731e-05	CNKSR3
228208_x_at	-1.64137	7.07634	-17.6674	4.17682e-08	2.07731e-05	ZNF354C
242807_at	1.76104	6.68066	17.635	4.24228e-08	2.08961e-05	FSD1L
202114_at	-1.4058	10.6117	-17.4743	4.58419e-08	2.23786e-05	SNX2
208268_at	-2.57632	6.35172	-17.435	4.67229e-08	2.26069e-05	ADAM28
222594_s_at	1.53298	6.09936	17.3777	4.80435e-08	2.2881e-05	SPATS2
228108_at	-1.92347	5.20643	-17.3741	4.81264e-08	2.2881e-05	PPM1L
1556097_at	-3.97912	5.58386	-17.2701	5.06343e-08	2.37396e-05	HOMER2
203222_s_at	-2.75899	6.4489	-17.2634	5.08008e-08	2.37396e-05	TLE1
221606_s_at	3.92619	6.22315	17.1921	5.26103e-08	2.40816e-05	HMGN5
205379_at	-2.20149	7.10694	-17.1872	5.27365e-08	2.40816e-05	CBR3
215393_s_at	-1.57914	5.42106	-17.1827	5.28539e-08	2.40816e-05	COBLL1
207735_at	-1.88299	6.62705	-17.1277	5.43072e-08	2.45392e-05	RNF125
212989_at	2.40931	8.22408	17.0651	5.60136e-08	2.51028e-05	SGMS1
223383_at	1.96486	6.06461	17.048	5.6491e-08	2.5111e-05	ZNRF1
232060_at	-2.35813	5.43979	-16.9436	5.94995e-08	2.62349e-05	ROR1
219073_s_at	-5.24281	7.93998	-16.8697	6.17383e-08	2.70044e-05	OSBPL10
202786_at	-4.1329	6.61464	-16.8014	6.38918e-08	2.73984e-05	STK39
203131_at	-3.84127	5.46852	-16.7892	6.42841e-08	2.73984e-05	PDGFRA
214772_at	-3.00418	5.12964	-16.7781	6.46437e-08	2.73984e-05	KIAA1549L
225123_at	-3.3709	8.6179	-16.677	6.80279e-08	2.83926e-05	SESN3
210094_s_at	1.64917	5.43405	16.6574	6.87087e-08	2.84595e-05	PARD3
203760_s_at	-2.73705	7.08892	-16.6318	6.96034e-08	2.86133e-05	SLA
228607_at	1.91986	7.19167	16.6055	7.05407e-08	2.87822e-05	OAS2
205248_at	-2.2858	6.44312	-16.5852	7.12726e-08	2.88654e-05	DOPEY2
211474_s_at	-3.84974	7.31055	-16.5331	7.31911e-08	2.94244e-05	SERPINB6
227066_at	-2.46323	7.8201	-16.514	7.391e-08	2.94966e-05	MOB3C
231747_at	-2.61714	8.6778	-16.3622	7.98974e-08	3.1655e-05	CYSLTR1
235463_s_at	2.40472	5.92983	16.2398	8.51169e-08	3.2856e-05	CERS6
235683_at	-3.14895	6.61737	-16.2363	8.52702e-08	3.2856e-05	SESN3
210993_s_at	3.67093	5.09462	16.2349	8.53325e-08	3.2856e-05	SMAD1
230866_at	-2.50974	8.7827	-16.0305	9.49503e-08	3.60514e-05	CYSLTR1
203129_s_at	-1.37981	5.80674	-16.0055	9.62074e-08	3.60646e-05	KIF5C
222774_s_at	2.72898	7.29085	16.0035	9.63041e-08	3.60646e-05	NETO2
235740_at	3.64585	4.83105	15.9099	1.01181e-07	3.75175e-05	MCTP1
225611_at	-2.52295	6.39957	-15.8471	1.04608e-07	3.81651e-05	MAST4
230193_at	-1.49591	4.7222	-15.8362	1.05214e-07	3.81651e-05	WDR66
242271_at	-2.28293	5.50344	-15.8267	1.0575e-07	3.81651e-05	SLC26A9
205997_at	-3.97855	7.37299	-15.7967	1.07454e-07	3.8209e-05	ADAM28
219584_at	2.75327	5.97321	15.7922	1.07706e-07	3.8209e-05	PLA1A
204388_s_at	-2.5773	4.60893	-15.7816	1.0832e-07	3.8209e-05	MAOA
227370_at	-2.70136	4.56292	-15.6561	1.15842e-07	4.01885e-05	FAM171B
213245_at	-3.57304	5.79876	-15.6514	1.16137e-07	4.01885e-05	ADCY1
203836_s_at	1.85344	8.81014	15.6156	1.18396e-07	4.07125e-05	MAP3K5
223287_s_at	-2.59718	9.01149	-15.6025	1.19236e-07	4.07451e-05	FOXP1
219895_at	3.57251	4.35155	15.5831	1.20488e-07	4.09174e-05	FAM70A
225959_s_at	2.35632	6.06525	15.5679	1.21483e-07	4.10005e-05	ZNRF1
1553300_a_at	1.35939	4.14687	15.5077	1.25502e-07	4.20972e-05	DGKH
209933_s_at	4.25711	6.72153	15.4919	1.26581e-07	4.22e-05	CD300A
219777_at	4.78492	5.14066	15.4668	1.2832e-07	4.23855e-05	GIMAP6
225589_at	3.08087	6.15057	15.4616	1.28688e-07	4.23855e-05	SH3RF1
219667_s_at	-3.17351	9.38311	-15.4302	1.30904e-07	4.28575e-05	BANK1
205543_at	2.80278	5.48851	15.4094	1.32395e-07	4.29304e-05	HSPA4L
202936_s_at	3.21001	5.07619	15.4052	1.32698e-07	4.29304e-05	SOX9
229723_at	-2.55116	9.46278	-15.3561	1.36301e-07	4.38368e-05	TAGAP
222409_at	1.26258	9.48989	15.3266	1.38523e-07	4.39269e-05	CORO1C
223599_at	2.72095	5.71314	15.3211	1.38943e-07	4.39269e-05	TRIM6
207357_s_at	2.59785	6.07144	15.3205	1.38991e-07	4.39269e-05	GALNT10
230276_at	-2.0935	5.52683	-15.2747	1.42524e-07	4.45595e-05	FAM49A
219400_at	2.09156	5.88055	15.2735	1.42623e-07	4.45595e-05	CNTNAP1
206999_at	2.67833	4.52847	15.2596	1.43716e-07	4.46458e-05	IL12RB2
238452_at	2.53085	5.98855	15.2412	1.45176e-07	4.48447e-05	FCRLB
216268_s_at	3.81039	4.74679	15.2256	1.46437e-07	4.498e-05	JAG1
226972_s_at	-1.36844	5.73275	-15.2009	1.48444e-07	4.52211e-05	CCDC136
206502_s_at	-5.23749	5.25172	-15.1956	1.48876e-07	4.52211e-05	INSM1
212412_at	1.88358	7.8959	15.1721	1.50826e-07	4.53098e-05	PDLIM5
224838_at	-2.80749	10.0894	-15.151	1.52598e-07	4.54459e-05	FOXP1
243052_at	-1.50563	6.0977	-15.1365	1.53829e-07	4.54459e-05	MOB3C
202085_at	1.34237	7.76686	15.1235	1.5494e-07	4.54459e-05	TJP2
219863_at	2.43023	8.52027	15.1178	1.55435e-07	4.54459e-05	HERC5
1558662_s_at	-2.76604	9.1003	-15.0788	1.58843e-07	4.61298e-05	BANK1
209447_at	-1.7544	8.13061	-15.0718	1.59461e-07	4.61298e-05	SYNE1
205568_at	2.07837	5.48099	15.0613	1.60394e-07	4.61556e-05	AQP9
216615_s_at	-2.96839	6.54086	-15.0332	1.6293e-07	4.66397e-05	HTR3A
209374_s_at	2.22774	12.3261	14.9838	1.67484e-07	4.76936e-05	IGHM
218589_at	3.81039	5.69192	14.9047	1.75092e-07	4.93773e-05	LPAR6
219737_s_at	-3.53322	7.26635	-14.8934	1.7621e-07	4.93773e-05	PCDH9
1558770_a_at	3.07821	5.55266	14.8702	1.78521e-07	4.93773e-05	PIK3R6
228153_at	-4.53921	7.03996	-14.8671	1.78833e-07	4.93773e-05	RNF144B
204131_s_at	-1.73856	6.8611	-14.861	1.7945e-07	4.93773e-05	FOXO3
224837_at	-2.80954	10.4769	-14.8434	1.81242e-07	4.93773e-05	FOXP1
228298_at	-2.03298	7.82304	-14.8337	1.82238e-07	4.93773e-05	PCED1B
212195_at	3.23488	7.98261	14.8319	1.82427e-07	4.93773e-05	IL6ST
219038_at	-2.16553	5.57067	-14.7979	1.85969e-07	4.99143e-05	MORC4
210756_s_at	-1.63551	6.79202	-14.7953	1.86237e-07	4.99143e-05	NOTCH2
210517_s_at	-4.34105	6.09604	-14.756	1.90445e-07	5.05465e-05	AKAP12
219274_at	4.97025	4.91631	14.7445	1.91689e-07	5.06309e-05	TSPAN12
227388_at	-2.667	6.24382	-14.6154	2.06336e-07	5.3978e-05	TUSC1
227198_at	-6.12385	8.54102	-14.6041	2.07682e-07	5.40715e-05	AFF3
242586_at	2.41173	6.85044	14.5385	2.15658e-07	5.5882e-05	FSD1L
229774_at	1.36609	4.21841	14.4877	2.22068e-07	5.72717e-05	CXXC4
205848_at	3.93612	5.21539	14.4298	2.2963e-07	5.89436e-05	GAS2
226683_at	-3.47796	8.27168	-14.4208	2.30834e-07	5.89758e-05	SNX18
204165_at	-1.38558	7.88926	-14.3978	2.33944e-07	5.94924e-05	WASF1
225033_at	-2.21256	6.7463	-14.338	2.42227e-07	6.13078e-05	ST3GAL1
229797_at	1.74501	4.39483	14.2963	2.48195e-07	6.19637e-05	MCOLN3
209890_at	-1.92301	6.37801	-14.2459	2.55637e-07	6.35315e-05	TSPAN5
209763_at	-2.22938	5.33145	-14.2214	2.59338e-07	6.37963e-05	CHRDL1
41037_at	1.80512	4.58358	14.2125	2.60694e-07	6.37963e-05	TEAD4
204959_at	3.51487	7.34236	14.2106	2.60989e-07	6.37963e-05	MNDA
208820_at	-1.47617	7.3555	-14.2081	2.61369e-07	6.37963e-05	PTK2
206233_at	2.97719	6.1007	14.1946	2.63448e-07	6.4018e-05	B4GALT6
223377_x_at	-2.67582	7.42245	-14.1451	2.71259e-07	6.53351e-05	CISH
221073_s_at	-1.34495	7.70257	-14.1286	2.7392e-07	6.56867e-05	NOD1
217552_x_at	3.30555	6.24775	14.0957	2.79291e-07	6.66539e-05	CR1
214453_s_at	3.84417	8.27275	14.085	2.81078e-07	6.66539e-05	IFI44
223382_s_at	2.58966	6.17311	14.0776	2.82317e-07	6.66539e-05	ZNRF1
203153_at	4.27261	6.26334	14.0745	2.82829e-07	6.66539e-05	IFIT1
203242_s_at	1.36148	5.51017	14.0202	2.92102e-07	6.85437e-05	PDLIM5
216080_s_at	-1.59638	7.24548	-13.9999	2.95665e-07	6.90833e-05	FADS3
231899_at	3.44366	6.48933	13.9298	3.08316e-07	7.14288e-05	ZC3H12C
203140_at	-5.05196	8.63423	-13.9227	3.09632e-07	7.14309e-05	BCL6
242388_x_at	-2.57371	7.9813	-13.8915	3.15471e-07	7.23643e-05	TAGAP
209485_s_at	-2.78229	5.26445	-13.8815	3.17377e-07	7.23643e-05	OSBPL1A
230363_s_at	-2.51028	5.69066	-13.8801	3.17648e-07	7.23643e-05	INPP5F
223961_s_at	-2.56028	6.10351	-13.8665	3.20249e-07	7.2654e-05	CISH
203233_at	-2.30087	9.60898	-13.8517	3.23105e-07	7.29989e-05	IL4R
227173_s_at	-3.29483	7.76865	-13.8295	3.27465e-07	7.36796e-05	BACH2
206618_at	5.09248	5.86407	13.8222	3.28917e-07	7.3703e-05	IL18R1
220448_at	-2.29493	5.19171	-13.7873	3.35917e-07	7.47877e-05	KCNK12
229367_s_at	3.87992	5.41441	13.7843	3.36527e-07	7.47877e-05	GIMAP6
227080_at	2.83525	5.58671	13.7734	3.38753e-07	7.47877e-05	ZNF697
204439_at	5.18624	7.91874	13.7711	3.39229e-07	7.47877e-05	IFI44L
202457_s_at	-1.20473	9.55055	-13.7519	3.43183e-07	7.53556e-05	PPP3CA
219132_at	-2.35461	6.25272	-13.7277	3.48271e-07	7.59228e-05	PELI2
201888_s_at	-4.08712	6.33765	-13.7264	3.48543e-07	7.59228e-05	IL13RA1
212667_at	2.18937	4.25547	13.6837	3.57707e-07	7.74595e-05	SPARC
225930_at	1.57655	6.69277	13.6804	3.58432e-07	7.74595e-05	NKIRAS1
202113_s_at	-1.45622	10.7916	-13.6648	3.61854e-07	7.78913e-05	SNX2
230438_at	1.64978	5.23897	13.6267	3.70373e-07	7.94124e-05	TBX15
1555564_a_at	-1.65808	4.28773	-13.6113	3.7386e-07	7.95361e-05	CFI
224791_at	-1.42539	8.85855	-13.5891	3.78985e-07	8.0314e-05	ASAP1
213518_at	-1.43686	8.3213	-13.5748	3.82332e-07	8.07104e-05	PRKCI
203837_at	1.89775	9.38196	13.5654	3.84545e-07	8.08654e-05	MAP3K5
203096_s_at	2.24346	5.79573	13.5548	3.87035e-07	8.10698e-05	RAPGEF2
223502_s_at	2.87975	7.14189	13.5447	3.89455e-07	8.10698e-05	TNFSF13B
224964_s_at	-1.80323	10.1598	-13.5426	3.89965e-07	8.10698e-05	GNG2
211597_s_at	-4.84795	7.63552	-13.5291	3.9321e-07	8.14346e-05	HOPX
212509_s_at	-2.64621	7.23366	-13.5161	3.96373e-07	8.178e-05	MXRA7
1552309_a_at	2.2499	5.49663	13.4994	4.00465e-07	8.23136e-05	NEXN
214438_at	-1.71903	6.05532	-13.4854	4.03933e-07	8.24069e-05	HLX
231154_x_at	1.29108	4.8588	13.4693	4.07973e-07	8.29217e-05	TINAG
214607_at	-2.44534	5.79703	-13.4293	4.18202e-07	8.43734e-05	PAK3
203097_s_at	3.41483	8.86292	13.4128	4.22504e-07	8.4928e-05	RAPGEF2
209238_at	-2.03348	6.58838	-13.4021	4.25316e-07	8.518e-05	STX3
212209_at	-2.59868	7.69561	-13.3816	4.30761e-07	8.59558e-05	MED13L
214023_x_at	4.04917	6.39414	13.3714	4.33501e-07	8.61879e-05	TUBB2B
225570_at	-2.53648	7.52994	-13.3495	4.39454e-07	8.70549e-05	SLC41A1
213373_s_at	-1.31084	9.10611	-13.3333	4.43912e-07	8.76206e-05	CASP8
212446_s_at	2.18936	7.50381	13.3191	4.47852e-07	8.80803e-05	CERS6
221223_x_at	-2.11712	7.47009	-13.2707	4.61607e-07	9.04601e-05	CISH
205514_at	-2.28868	5.00263	-13.2533	4.66679e-07	9.11273e-05	ZNF415
230362_at	-1.97684	5.72014	-13.2029	4.81677e-07	9.33889e-05	INPP5F
228636_at	3.48997	6.20171	13.1621	4.94226e-07	9.54834e-05	BHLHE22
228952_at	-1.28168	4.76523	-13.15	4.98013e-07	9.58762e-05	ENPP1
230179_at	1.70225	8.34101	13.1373	5.02024e-07	9.63094e-05	GFOD1
212417_at	1.2594	6.15214	13.1254	5.05819e-07	9.63642e-05	SCAMP1
235049_at	-2.45009	5.72767	-13.12	5.07547e-07	9.63642e-05	ADCY1
1552390_a_at	3.31423	4.7671	13.1199	5.07598e-07	9.63642e-05	C8orf47
211708_s_at	1.36231	6.0331	13.055	5.28926e-07	9.97207e-05	SCD
1553183_at	-3.4514	4.6353	-13.0433	5.3286e-07	0.000100117	UMODL1
226959_at	-2.19226	8.63799	-13.0151	5.42531e-07	0.000100554	CAMK1D
228427_at	3.00473	4.71518	13.015	5.42561e-07	0.000100554	FBXO16
226725_at	1.45107	6.86463	13.0097	5.44379e-07	0.000100554	SLFN5
229844_at	-3.13667	7.85303	-12.9997	5.47888e-07	0.000100861	FOXP1
235626_at	-1.91171	8.74392	-12.9888	5.51686e-07	0.000100998	CAMK1D
1562019_at	-1.73577	3.848	-12.9841	5.5335e-07	0.000100998	NT5DC4
205803_s_at	-3.00951	5.21323	-12.9722	5.57594e-07	0.000100998	TRPC1
210852_s_at	-1.73995	5.17821	-12.9714	5.57868e-07	0.000100998	AASS
237395_at	-2.86699	4.20965	-12.9607	5.61716e-07	0.000101359	CYP4Z1
205902_at	3.08599	5.62698	12.9344	5.7124e-07	0.000102739	KCNN3
212959_s_at	1.51416	9.22834	12.9225	5.75621e-07	0.000103187	GNPTAB
202822_at	-3.04036	7.47619	-12.9017	5.83349e-07	0.000104231	LPP
217078_s_at	2.91825	5.14843	12.8945	5.86062e-07	0.000104374	CD300A
209236_at	-1.93777	7.88273	-12.8892	5.88079e-07	0.000104394	SLC23A2
217947_at	-1.65393	10.8597	-12.8645	5.97475e-07	0.000105718	CMTM6
225491_at	-3.33542	4.41923	-12.8595	5.9941e-07	0.000105719	SLC1A2
218888_s_at	3.28147	6.83266	12.8397	6.07112e-07	0.00010639	NETO2
223717_s_at	-1.46291	5.77753	-12.8333	6.09614e-07	0.000106474	ACRBP
204485_s_at	2.77212	4.29807	12.8286	6.11481e-07	0.000106474	TOM1L1
208126_s_at	-1.7147	5.04929	-12.7959	6.24556e-07	0.000107444	CYP2C18
209099_x_at	3.37172	5.20535	12.795	6.24915e-07	0.000107444	JAG1
202948_at	2.20796	4.338	12.7568	6.40581e-07	0.000109689	IL1R1
220358_at	-2.48545	8.9853	-12.7524	6.42412e-07	0.000109689	BATF3
222945_x_at	-1.46987	4.90841	-12.7486	6.43988e-07	0.000109689	OLAH
225306_s_at	-1.1335	7.47517	-12.7303	6.51712e-07	0.000110419	SLC25A29
202662_s_at	1.72468	7.29319	12.723	6.54797e-07	0.000110419	ITPR2
228518_at	-4.03334	8.98324	-12.7194	6.56356e-07	0.000110419	IGHG1
1553196_a_at	-2.38764	5.57506	-12.7138	6.58731e-07	0.000110479	FCRL3
203216_s_at	3.03942	6.07415	12.6915	6.68387e-07	0.000111546	MYO6
209183_s_at	2.25026	5.52171	12.6868	6.7044e-07	0.000111546	C10orf10
222857_s_at	-1.43303	6.28505	-12.685	6.71212e-07	0.000111546	KCNMB4
232181_at	2.24196	6.57709	12.6674	6.78977e-07	0.000112494	PPARGC1B
235650_at	-2.15201	4.99074	-12.6605	6.82053e-07	0.000112662	CDHR3
213103_at	1.68741	5.43218	12.6538	6.85064e-07	0.000112819	STARD13
213172_at	1.85852	5.78557	12.6439	6.89507e-07	0.00011314	TTC9
205856_at	-3.37044	4.92952	-12.6357	6.9323e-07	0.00011314	SLC14A1
218862_at	-2.64469	6.53153	-12.6317	6.9505e-07	0.00011314	ASB13
210519_s_at	1.38767	6.38689	12.6311	6.95289e-07	0.00011314	NQO1
203795_s_at	-2.71483	7.00635	-12.5894	7.14577e-07	0.00011559	BCL7A
238332_at	2.70948	4.46166	12.5702	7.23649e-07	0.000116712	ANKRD29
210683_at	-2.51387	4.66485	-12.5653	7.26002e-07	0.000116747	NRTN
226609_at	2.62457	4.70867	12.5527	7.3207e-07	0.000117185	DCBLD1
205802_at	-2.96383	5.20507	-12.4913	7.62354e-07	0.000120932	TRPC1
222593_s_at	1.39642	8.26186	12.4898	7.6308e-07	0.000120932	SPATS2
244780_at	2.78363	5.54997	12.4721	7.72107e-07	0.000122009	SGPP2
217002_s_at	-1.68906	5.39984	-12.4374	7.9007e-07	0.000124129	HTR3A
218096_at	2.25712	10.2053	12.4107	8.0423e-07	0.000125992	AGPAT5
209684_at	-2.76117	4.76859	-12.3995	8.10228e-07	0.000126569	RIN2
203761_at	-2.77131	7.44175	-12.3802	8.2074e-07	0.000127245	SLA
225060_at	-2.3998	4.6369	-12.3802	8.20754e-07	0.000127245	LRP11
202806_at	1.60477	6.09629	12.3787	8.21537e-07	0.000127245	DBN1
225962_at	1.50964	4.28803	12.3576	8.33204e-07	0.000128688	ZNRF1
207643_s_at	2.19903	5.56561	12.3005	8.65705e-07	0.000132956	TNFRSF1A
221207_s_at	-1.40402	5.42719	-12.2746	8.80861e-07	0.000134905	NBEA
219975_x_at	-1.93716	4.35373	-12.2568	8.9151e-07	0.000136154	OLAH
222033_s_at	-2.74023	6.16553	-12.2036	9.24024e-07	0.000140659	FLT1
210145_at	3.00695	4.91339	12.1958	9.28963e-07	0.000140659	PLA2G4A
223845_at	-1.2235	4.88674	-12.1951	9.2941e-07	0.000140659	VSIG10
1555889_a_at	-1.64296	8.74662	-12.1921	9.31298e-07	0.000140659	CRTAP
213358_at	-3.3045	6.27712	-12.1838	9.36502e-07	0.000140668	SOGA2
202086_at	3.39185	9.21995	12.1488	9.58987e-07	0.000143258	MX1
231775_at	-1.75667	7.89944	-12.1377	9.66212e-07	0.000143945	TNFRSF10A
201141_at	2.21595	4.70748	12.1099	9.84647e-07	0.000146292	GPNMB
205988_at	-1.89003	7.54891	-12.1051	9.87901e-07	0.000146378	CD84
204866_at	-2.13412	8.15153	-12.0915	9.97077e-07	0.000147338	PHF16
221526_x_at	1.67472	5.60834	12.0717	1.01065e-06	0.000148942	PARD3
225604_s_at	-2.32097	6.45773	-12.0449	1.02933e-06	0.000150882	GLIPR2
219520_s_at	-1.63205	8.11744	-12.0324	1.03814e-06	0.000151765	WWC3
209683_at	-3.1669	6.92425	-12.0282	1.04114e-06	0.000151799	FAM49A
227530_at	-2.42894	5.53382	-12.0081	1.05555e-06	0.00015349	AKAP12
220484_at	1.14451	4.54923	12.0036	1.05887e-06	0.000153565	MCOLN3
219412_at	2.91318	5.56357	11.9973	1.0634e-06	0.000153813	RAB38
205101_at	-2.58273	7.70663	-11.9871	1.07092e-06	0.000154326	CIITA
231769_at	1.58211	7.25128	11.9817	1.07491e-06	0.000154326	FBXO6
230241_at	1.53088	5.72137	11.981	1.07541e-06	0.000154326	TOR1AIP2
212256_at	2.3278	7.97408	11.9472	1.10067e-06	0.000157538	GALNT10
204747_at	3.36759	7.48582	11.9126	1.12728e-06	0.000160924	IFIT3
227568_at	-1.84511	6.02082	-11.8675	1.16296e-06	0.00016523	HECTD2
204471_at	-4.86412	5.45322	-11.8669	1.16349e-06	0.00016523	GAP43
219352_at	2.31219	6.37479	11.849	1.17798e-06	0.000166424	HERC6
218700_s_at	-1.29193	8.471	-11.8386	1.18656e-06	0.000167204	RAB7L1
235749_at	1.41478	4.84981	11.794	1.22391e-06	0.000170546	UGGT2
219165_at	-1.53841	7.29505	-11.792	1.22565e-06	0.000170546	PDLIM2
1555561_a_at	1.1693	4.13593	11.7917	1.22587e-06	0.000170546	UGGT2
219211_at	3.29728	6.7788	11.7792	1.23666e-06	0.00017161	USP18
215990_s_at	-2.38207	6.20923	-11.7087	1.29911e-06	0.00017982	BCL6
201482_at	-1.13119	7.54873	-11.6824	1.32332e-06	0.000182421	QSOX1
234050_at	-2.53893	6.84481	-11.6811	1.32458e-06	0.000182421	TAGAP
224796_at	-1.17329	8.65065	-11.6665	1.33825e-06	0.000183841	ASAP1
201300_s_at	-1.85174	9.79875	-11.6627	1.34183e-06	0.000183871	PRNP
207519_at	1.81087	5.07628	11.6352	1.36802e-06	0.000186992	SLC6A4
227732_at	-1.73957	6.19295	-11.6208	1.38201e-06	0.000188433	ATXN7L1
222915_s_at	-2.5972	7.74053	-11.5948	1.40769e-06	0.000191456	BANK1
207315_at	4.85428	5.51168	11.5858	1.41668e-06	0.000191939	CD226
219670_at	-4.37429	7.61561	-11.5842	1.41826e-06	0.000191939	BEND5
209153_s_at	-1.29592	9.85927	-11.5601	1.44264e-06	0.000194305	TCF3
225273_at	-1.69491	8.71507	-11.5549	1.44803e-06	0.000194305	WWC3
226925_at	-2.45089	6.13115	-11.553	1.44996e-06	0.000194305	ACPL2
1555573_at	1.56145	4.13221	11.5439	1.45934e-06	0.000195084	TTC40
213623_at	1.42933	6.73894	11.5297	1.47417e-06	0.000196586	KIF3A
210889_s_at	3.58977	7.67079	11.511	1.49396e-06	0.00019874	FCGR2B
219321_at	1.3466	5.60004	11.4967	1.5092e-06	0.000199795	MPP5
225688_s_at	-1.88997	6.0253	-11.4775	1.52998e-06	0.000202057	PHLDB2
222692_s_at	2.77647	5.39734	11.4735	1.53438e-06	0.000202151	FNDC3B
202743_at	2.50595	6.61321	11.4675	1.54103e-06	0.000202169	PIK3R3
203865_s_at	-3.25966	6.42805	-11.4667	1.54192e-06	0.000202169	ADARB1
204730_at	-2.16824	6.85179	-11.4564	1.55327e-06	0.00020317	RIMS3
210753_s_at	-1.81447	6.59777	-11.4471	1.56361e-06	0.000204034	EPHB1
227119_at	-1.86918	7.20129	-11.4394	1.57224e-06	0.000204197	CNOT6L
226803_at	1.90192	4.57836	11.4202	1.59411e-06	0.000206047	CHMP4C
202660_at	1.61006	8.36041	11.4081	1.608e-06	0.000206729	ITPR2
226485_at	-2.16588	5.34987	-11.4064	1.60991e-06	0.000206729	VSIG10
234284_at	-4.23938	7.56675	-11.4057	1.61073e-06	0.000206729	GNG8
226656_at	-1.66355	7.57697	-11.3936	1.62476e-06	0.000208041	CRTAP
235252_at	1.32854	8.44656	11.3775	1.64369e-06	0.000209974	KSR1
204103_at	4.86162	7.99731	11.3635	1.6603e-06	0.000211602	CCL4
230509_at	-1.13655	7.97405	-11.3437	1.68424e-06	0.000213884	SNX22
203796_s_at	-2.68903	7.14025	-11.3422	1.68603e-06	0.000213884	BCL7A
213664_at	3.45303	6.29683	11.3098	1.72595e-06	0.000217421	SLC1A1
201850_at	-2.25511	8.48648	-11.3067	1.72983e-06	0.000217421	CAPG
217889_s_at	2.46862	5.49772	11.2989	1.73964e-06	0.000218153	CYBRD1
209670_at	1.54547	8.11872	11.285	1.75726e-06	0.000219645	TRAC
229064_s_at	-2.48227	6.59049	-11.2832	1.75957e-06	0.000219645	RCAN3
228195_at	1.81978	4.73841	11.2666	1.7808e-06	0.000221577	C2orf88
220122_at	3.51056	5.22857	11.2648	1.78315e-06	0.000221577	MCTP1
222154_s_at	2.34871	6.17689	11.2606	1.78855e-06	0.000221743	SPATS2L
200887_s_at	2.19599	10.1219	11.2498	1.80276e-06	0.000222298	STAT1
232792_at	2.48847	6.09882	11.2455	1.80836e-06	0.000222298	TRIM69
208771_s_at	-1.64082	11.1625	-11.2448	1.80928e-06	0.000222298	LTA4H
203066_at	-2.74336	7.30046	-11.2345	1.8229e-06	0.000223469	CHST15
230391_at	-2.1801	8.84219	-11.2272	1.83263e-06	0.000224159	CD84
206545_at	3.3658	4.50006	11.1991	1.87054e-06	0.000228067	CD28
229450_at	3.78085	8.13559	11.1973	1.87292e-06	0.000228067	IFIT3
222803_at	1.09758	4.24888	11.1874	1.88654e-06	0.000228707	PRTFDC1
209444_at	-1.20794	9.35343	-11.1811	1.89522e-06	0.000228968	RAP1GDS1
227624_at	1.27487	8.59084	11.1736	1.90562e-06	0.000229365	TET2
226344_at	-2.80032	6.26056	-11.1714	1.90876e-06	0.000229365	ZMAT1
204141_at	2.99097	8.66192	11.1075	2.00019e-06	0.0002393	TUBB2A
58780_s_at	-2.09932	4.92937	-11.0999	2.01139e-06	0.000240115	ARHGEF40
203574_at	-4.19751	8.46923	-11.0865	2.03143e-06	0.000241454	NFIL3
235333_at	3.12121	6.91326	11.0769	2.04573e-06	0.000242434	B4GALT6
1562020_s_at	-1.61747	4.41779	-11.0731	2.05159e-06	0.000242434	NT5DC4
207120_at	-2.09594	4.74766	-11.0721	2.05298e-06	0.000242434	ZNF667
210407_at	1.87444	6.09201	11.0589	2.07307e-06	0.000244278	PPM1A
229147_at	3.69116	6.46995	11.0391	2.10364e-06	0.000246816	RASSF6
239233_at	1.95953	4.37104	11.0144	2.1425e-06	0.000250448	CCDC88A
212637_s_at	1.36063	7.02145	11.0115	2.14696e-06	0.000250448	WWP1
205052_at	-2.29725	8.43318	-11.0082	2.15226e-06	0.000250448	AUH
207121_s_at	1.89744	9.73023	11.005	2.15734e-06	0.000250448	MAPK6
202443_x_at	-3.08537	9.3936	-11.0025	2.16146e-06	0.000250448	NOTCH2
229597_s_at	-1.0911	9.3644	-11.0021	2.16207e-06	0.000250448	WDFY4
208322_s_at	-1.79199	7.13653	-10.9664	2.22013e-06	0.000256088	ST3GAL1
202975_s_at	3.09816	5.65515	10.9505	2.2465e-06	0.000258584	RHOBTB3
214933_at	-1.2625	7.13026	-10.9323	2.27712e-06	0.000260464	CACNA1A
244313_at	2.86483	6.17606	10.9179	2.30179e-06	0.000262736	CR1
201641_at	1.16944	9.26767	10.9063	2.32175e-06	0.000264462	BST2
206571_s_at	-2.63414	8.61455	-10.8957	2.34028e-06	0.000265766	MAP4K4
209075_s_at	1.14206	11.132	10.8934	2.34418e-06	0.000265766	ISCU
230983_at	-1.73911	9.09118	-10.8914	2.34778e-06	0.000265766	FAM129C
208704_x_at	-1.2443	8.49954	-10.8859	2.35735e-06	0.000266298	APLP2
205098_at	2.35041	5.28647	10.8693	2.38689e-06	0.000269078	CCR1
214058_at	-2.20672	5.83595	-10.8368	2.44569e-06	0.00027456	MYCL1
240574_at	1.66153	4.28846	10.8342	2.45058e-06	0.00027456	DNAJC3-AS1
229088_at	-1.24303	4.09263	-10.8063	2.50244e-06	0.000279226	ENPP1
240070_at	1.88533	6.23151	10.7974	2.51929e-06	0.000280534	TIGIT
212196_at	2.44055	6.70512	10.7942	2.52541e-06	0.000280644	IL6ST
218995_s_at	2.05424	6.12057	10.7884	2.53641e-06	0.000281295	EDN1
226103_at	2.60091	5.57939	10.7637	2.58429e-06	0.000285785	NEXN
223079_s_at	1.79887	6.05904	10.7621	2.58736e-06	0.000285785	GLS
237328_at	2.06488	4.71008	10.7506	2.61003e-06	0.000287708	C14orf105
211612_s_at	-4.26209	6.27076	-10.741	2.62898e-06	0.000289214	IL13RA1
224806_at	1.10268	8.53962	10.735	2.64087e-06	0.000289939	TRIM25
218312_s_at	-1.76317	8.19068	-10.7222	2.66666e-06	0.000291017	ZSCAN18
212912_at	-1.49486	7.30505	-10.7143	2.68269e-06	0.000292183	RPS6KA2
224190_x_at	-1.16812	6.09702	-10.7013	2.70922e-06	0.000294487	NOD1
207901_at	3.34704	4.42795	10.6929	2.72664e-06	0.000295206	IL12B
208943_s_at	1.44711	10.1053	10.6554	2.80566e-06	0.000302563	SEC62
218699_at	-1.32195	9.88925	-10.6417	2.83509e-06	0.000305135	RAB7L1
238115_at	-1.16506	6.15961	-10.6048	2.91621e-06	0.000311413	DNAJC18
203240_at	-1.5795	5.82486	-10.5669	3.00195e-06	0.000318085	FCGBP
232546_at	1.82491	4.6577	10.5599	3.01815e-06	0.000318566	TP73
1558711_at	-1.78082	6.24863	-10.5553	3.02882e-06	0.000319076	FAM13A-AS1
222802_at	3.00371	5.68658	10.5427	3.0583e-06	0.000321563	EDN1
1563209_a_at	-2.92935	8.69815	-10.539	3.06705e-06	0.000321864	MACROD2
225387_at	-2.28307	6.24825	-10.5205	3.11111e-06	0.000325703	TSPAN5
202425_x_at	-1.12767	9.89627	-10.5168	3.12005e-06	0.000325703	PPP3CA
212190_at	-1.70641	7.00651	-10.5102	3.13597e-06	0.000326287	SERPINE2
226153_s_at	-1.33942	9.01926	-10.5068	3.14414e-06	0.000326287	CNOT6L
213093_at	-4.12361	6.06141	-10.5022	3.15528e-06	0.000326733	PRKCA
223552_at	-1.25067	5.85741	-10.4984	3.16452e-06	0.000327071	LRRC4
228762_at	-1.93165	7.96011	-10.4727	3.22804e-06	0.000332379	LFNG
44783_s_at	3.21808	6.3943	10.4702	3.23425e-06	0.000332392	HEY1
238759_at	1.44417	5.08857	10.4661	3.24462e-06	0.000332832	CCDC88A
240432_x_at	-2.12385	7.83908	-10.4629	3.25279e-06	0.000333045	KLF7
213170_at	-2.61448	7.38358	-10.4489	3.28815e-06	0.000336036	GPX7
244370_at	3.43247	5.07666	10.4324	3.33053e-06	0.000339732	KIAA2022
232226_at	1.29809	4.9596	10.4186	3.3663e-06	0.00034237	LRRC4C
227529_s_at	-2.11627	4.05141	-10.4116	3.3848e-06	0.000343347	AKAP12
225927_at	-1.24388	9.98664	-10.3975	3.42208e-06	0.000345845	MAP3K1
213069_at	2.50825	7.87763	10.3874	3.44919e-06	0.000346778	HEG1
206187_at	-1.59713	7.24551	-10.387	3.45033e-06	0.000346778	PTGIR
213294_at	1.26811	9.23883	10.3619	3.51855e-06	0.000352338	EIF2AK2
210127_at	-1.46767	4.94064	-10.3444	3.56677e-06	0.000356514	RAB6B
225269_s_at	-1.01954	8.30066	-10.3419	3.57378e-06	0.000356563	RBMS1
1553639_a_at	1.10267	5.6514	10.3278	3.61358e-06	0.000359877	PPARGC1B
233935_at	1.08859	5.30533	10.3246	3.62264e-06	0.000359941	TNFSF14
1559065_a_at	-2.70206	5.15841	-10.3167	3.64502e-06	0.000359941	CLEC4G
226817_at	2.51297	5.25519	10.3142	3.65217e-06	0.000359941	DSC2
213264_at	-1.25823	8.49083	-10.3065	3.67422e-06	0.000361309	PCBP2
218839_at	2.48413	6.43609	10.2997	3.69396e-06	0.000362097	HEY1
1559361_at	1.3529	4.89134	10.2816	3.74685e-06	0.00036582	MACC1
202289_s_at	-2.20371	4.51908	-10.2608	3.80882e-06	0.000370547	TACC2
205403_at	3.40248	5.11064	10.2514	3.83708e-06	0.000371972	IL1R2
212923_s_at	-1.56142	7.15915	-10.2462	3.85294e-06	0.000372849	PXDC1
226003_at	2.55179	6.85856	10.2428	3.86309e-06	0.000372888	KIF21A
202177_at	-2.30667	6.01047	-10.2415	3.86699e-06	0.000372888	GAS6
226789_at	-1.21364	9.3677	-10.2385	3.87638e-06	0.000373136	EMB
217809_at	-3.16657	9.2226	-10.2328	3.89362e-06	0.00037348	BZW2
242625_at	2.52582	4.83438	10.2139	3.95241e-06	0.000378455	RSAD2
36566_at	-1.62152	7.28285	-10.1782	4.06569e-06	0.000387363	CTNS
233126_s_at	-2.02783	4.01834	-10.1779	4.06669e-06	0.000387363	OLAH
219821_s_at	1.54503	8.16649	10.1674	4.10061e-06	0.000389915	GFOD1
201360_at	1.46335	5.53197	10.1651	4.10824e-06	0.000389962	CST3
201467_s_at	1.3764	5.44047	10.1506	4.1556e-06	0.000393093	NQO1
213733_at	-1.68226	6.78874	-10.1364	4.20288e-06	0.000396161	MYO1F
209537_at	1.4937	7.3384	10.1349	4.208e-06	0.000396161	EXTL2
37408_at	-1.20067	7.2834	-10.1342	4.2103e-06	0.000396161	MRC2
207871_s_at	2.22839	6.93885	10.1322	4.21703e-06	0.000396161	ST7
204211_x_at	1.04585	7.4342	10.1201	4.25785e-06	0.000398727	EIF2AK2
210480_s_at	1.70249	5.74432	10.1198	4.25892e-06	0.000398727	MYO6
206715_at	-2.87448	5.70316	-10.1157	4.27277e-06	0.000398966	TFEC
235278_at	-2.66613	10.0422	-10.1147	4.27607e-06	0.000398966	MACROD2
207551_s_at	1.61629	8.85385	10.1124	4.28408e-06	0.000399033	MSL3
205885_s_at	1.97229	6.7853	10.1092	4.29507e-06	0.000399175	ITGA4
226092_at	1.01791	7.51071	10.1076	4.30061e-06	0.000399175	MPP5
213293_s_at	1.12715	11.1547	10.1055	4.30751e-06	0.000399175	TRIM22
229151_at	-3.43095	5.00487	-10.1018	4.32057e-06	0.000399333	SLC14A1
225649_s_at	-1.32439	10.0885	-10.0754	4.41247e-06	0.000406832	STK35
213238_at	1.31545	7.96705	10.0685	4.43699e-06	0.000407949	ATP10D
229598_at	-1.52714	5.0267	-10.0678	4.4395e-06	0.000407949	COBLL1
200985_s_at	-1.61496	10.1032	-10.0515	4.49769e-06	0.000412603	CD59
203932_at	-2.26834	10.8784	-10.0177	4.62166e-06	0.000421852	HLA-DMB
228061_at	-2.23423	6.36907	-10.0082	4.65702e-06	0.000423417	CCDC126
222258_s_at	-2.4988	5.24455	-10.005	4.669e-06	0.000423417	SH3BP4
223754_at	1.75746	5.5186	10.0048	4.66979e-06	0.000423417	C2orf88
219126_at	-1.16717	8.54196	-9.99898	4.69163e-06	0.00042427	PHF10
224279_s_at	-1.09719	5.89986	-9.99816	4.69471e-06	0.00042427	CABYR
211801_x_at	1.09568	7.12926	9.99105	4.72167e-06	0.000426002	MFN1
212442_s_at	1.83724	7.85784	9.9817	4.75739e-06	0.000428517	CERS6
1552789_at	2.03696	6.6351	9.97615	4.77874e-06	0.000429054	SEC62
230109_at	-1.57244	6.53213	-9.97404	4.78688e-06	0.000429054	PDE7B
212377_s_at	-3.07387	8.69192	-9.96454	4.82376e-06	0.000430243	NOTCH2
220182_at	1.2763	5.70573	9.96203	4.83353e-06	0.000430412	SLC25A23
207030_s_at	1.55076	5.36975	9.95366	4.86633e-06	0.000431926	CSRP2
218618_s_at	2.60067	6.19029	9.92852	4.96636e-06	0.000439378	FNDC3B
213848_at	1.49069	6.96103	9.92529	4.97937e-06	0.000439574	DUSP7
229027_at	2.39023	6.00712	9.92396	4.98474e-06	0.000439574	PPM1A
235460_at	-1.04342	7.04262	-9.92199	4.99269e-06	0.000439574	SNX22
204679_at	1.92558	5.55317	9.90811	5.04919e-06	0.000443122	KCNK1
239975_at	-2.16663	5.65482	-9.9061	5.05744e-06	0.000443134	HLA-DPB2
213854_at	-1.15452	6.07295	-9.88729	5.1353e-06	0.000448519	SYNGR1
205718_at	1.04428	7.80553	9.87998	5.16595e-06	0.000450476	ITGB7
202069_s_at	1.38546	8.77571	9.86747	5.21879e-06	0.000454359	IDH3A
205483_s_at	3.07683	9.12132	9.86428	5.2324e-06	0.000454819	ISG15
225238_at	1.64915	6.27643	9.86128	5.24517e-06	0.000455206	MSI2
223586_at	1.43984	6.90873	9.80645	5.48542e-06	0.000473963	ARNTL2
203243_s_at	2.03331	7.37253	9.80603	5.48731e-06	0.000473963	PDLIM5
230465_at	1.57895	4.82172	9.79803	5.52336e-06	0.000475574	HS2ST1
237033_at	-1.15714	6.37041	-9.79509	5.5367e-06	0.000475973	FAM159A
238917_s_at	1.35655	6.63893	9.7913	5.5539e-06	0.000476702	DENND5B
220137_at	-1.56935	4.68009	-9.78116	5.6003e-06	0.000479931	VSIG10
203835_at	-2.25591	7.22333	-9.76814	5.66045e-06	0.000483517	LRRC32
202935_s_at	2.44242	4.49257	9.75105	5.74053e-06	0.000487581	SOX9
209928_s_at	2.02714	6.07991	9.75051	5.74307e-06	0.000487581	MSC
209122_at	1.51727	8.25704	9.7244	5.86794e-06	0.00049741	PLIN2
227144_at	1.2225	6.75954	9.71613	5.90808e-06	0.000500037	KIAA0930
209568_s_at	1.93037	7.05881	9.71293	5.92373e-06	0.000500257	RGL1
225532_at	1.49458	8.01037	9.7106	5.93511e-06	0.000500257	CABLES1
208092_s_at	-2.17138	6.2473	-9.70999	5.93812e-06	0.000500257	FAM49A
228367_at	2.47506	5.1059	9.70712	5.95218e-06	0.00050067	ALPK2
202962_at	-1.10914	8.20484	-9.69037	6.03518e-06	0.000506871	KIF13B
213578_at	1.50051	7.13423	9.68555	6.05925e-06	0.000508113	BMPR1A
224336_s_at	2.14843	5.61888	9.67199	6.12769e-06	0.000511498	DUSP16
208248_x_at	-1.25307	8.74527	-9.63098	6.33978e-06	0.00052732	APLP2
203209_at	-1.39312	9.24958	-9.62532	6.36971e-06	0.000527536	RFC5
202429_s_at	-1.16319	9.54924	-9.62268	6.38367e-06	0.000527536	PPP3CA
218424_s_at	1.93508	6.05954	9.62018	6.397e-06	0.000527536	STEAP3
227169_at	-1.32185	5.79567	-9.61596	6.41948e-06	0.000528592	DNAJC18
223767_at	1.29805	4.63674	9.60832	6.46048e-06	0.000530168	GPR84
224461_s_at	1.82264	7.27154	9.60523	6.47712e-06	0.000530168	AIFM2
225167_at	3.30749	5.36255	9.60058	6.50226e-06	0.000530996	FRMD4A
204257_at	-1.25838	8.03176	-9.59233	6.54713e-06	0.000531893	FADS3
202687_s_at	1.58	7.20397	9.58679	6.57745e-06	0.000532589	TNFSF10
1552542_s_at	-1.71966	6.40584	-9.58189	6.60444e-06	0.00053338	TAGAP
220615_s_at	1.95087	4.96345	9.57347	6.65102e-06	0.000536349	FAR2
219479_at	1.69474	5.46627	9.55861	6.73419e-06	0.000542256	KDELC1
219410_at	3.646	5.66788	9.55488	6.75523e-06	0.00054236	TMEM45A
205313_at	1.5166	6.70741	9.55487	6.75532e-06	0.00054236	HNF1B
209487_at	1.55465	4.79896	9.55182	6.77253e-06	0.000542945	RBPMS
220755_s_at	-1.55594	11.0656	-9.54756	6.79676e-06	0.000544089	C6orf48
218324_s_at	1.37411	7.46491	9.5441	6.81646e-06	0.000544868	SPATS2
229978_at	-2.35841	4.69921	-9.53705	6.85689e-06	0.0005473	SHISA9
225168_at	2.8196	6.47256	9.5253	6.92476e-06	0.000551911	FRMD4A
221039_s_at	-1.08488	7.41513	-9.51831	6.96549e-06	0.000553544	ASAP1
210972_x_at	1.41703	7.86479	9.51528	6.98328e-06	0.000554152	TRAC
203775_at	1.09155	7.97351	9.50609	7.03739e-06	0.000557636	SLC25A13
243999_at	1.20179	5.03543	9.46052	7.31276e-06	0.000576948	SLFN5
201749_at	-1.06767	7.5949	-9.4583	7.32642e-06	0.000577193	ECE1
212993_at	2.31979	5.76468	9.44692	7.39721e-06	0.000581932	NACC2
218885_s_at	-2.10398	6.0097	-9.41844	7.57758e-06	0.000592426	GALNT12
225202_at	2.86584	6.5905	9.41766	7.58259e-06	0.000592426	RHOBTB3
217388_s_at	-1.17352	9.72015	-9.41171	7.62095e-06	0.000593555	KYNU
201341_at	2.76344	7.01414	9.40021	7.69562e-06	0.000598518	ENC1
223047_at	-1.60399	10.3465	-9.38672	7.78424e-06	0.000603692	CMTM6
227379_at	1.92523	6.81634	9.38293	7.80934e-06	0.000604782	MBOAT1
200931_s_at	-2.12396	9.21905	-9.37893	7.83597e-06	0.000605986	VCL
202976_s_at	3.41793	6.26741	9.37029	7.89373e-06	0.000607873	RHOBTB3
203215_s_at	2.57779	5.15303	9.36765	7.91149e-06	0.000608383	MYO6
212543_at	1.75616	9.18766	9.34091	8.09378e-06	0.000620655	AIM1
212535_at	-1.31335	9.77933	-9.33679	8.1223e-06	0.000621971	MEF2A
239288_at	2.26366	5.52169	9.33249	8.15214e-06	0.000623382	TNIK
1570130_at	1.01753	3.94277	9.30929	8.31537e-06	0.000632743	SPATS2
220214_at	1.49995	6.00604	9.30852	8.32084e-06	0.000632743	ZNF215
243010_at	1.2939	6.62832	9.30649	8.33533e-06	0.000632964	MSI2
206167_s_at	4.21896	5.23348	9.30143	8.37145e-06	0.000634825	ARHGAP6
209671_x_at	1.42575	7.97814	9.29647	8.40708e-06	0.000636644	TRAC
202421_at	-2.90869	7.46168	-9.29384	8.42604e-06	0.000637197	IGSF3
1565034_s_at	-2.01414	4.93279	-9.28245	8.50871e-06	0.000641516	AFF3
231897_at	2.43854	5.40777	9.28077	8.52095e-06	0.000641516	PTGR1
211898_s_at	-1.5546	5.48596	-9.27953	8.53008e-06	0.000641516	EPHB1
219508_at	1.10034	5.3162	9.27185	8.58643e-06	0.0006431	GCNT3
210839_s_at	1.85018	5.09614	9.26698	8.62242e-06	0.000644238	ENPP2
226568_at	-2.39233	9.43237	-9.2666	8.62519e-06	0.000644238	FAM102B
203919_at	-1.10336	7.37817	-9.26207	8.65881e-06	0.000645867	TCEA2
229498_at	1.34374	8.80285	9.25955	8.6776e-06	0.000646387	MBNL3
226022_at	2.08366	5.72511	9.25537	8.70886e-06	0.000647833	SASH1
203217_s_at	-2.8536	8.90777	-9.24202	8.80941e-06	0.000653534	ST3GAL5
205926_at	1.03469	7.10995	9.24157	8.81279e-06	0.000653534	IL27RA
205291_at	2.58605	7.85122	9.24044	8.82137e-06	0.000653534	IL2RB
204759_at	3.20649	7.36049	9.23866	8.83496e-06	0.000653656	RCBTB2
1598_g_at	-1.48319	7.79394	-9.23387	8.87146e-06	0.000654584	GAS6
212345_s_at	1.24456	9.15728	9.22247	8.95899e-06	0.000658753	CREB3L2
229656_s_at	-2.42893	6.28717	-9.22181	8.9641e-06	0.000658753	EML6
213263_s_at	-1.15667	8.24943	-9.21394	9.02519e-06	0.000662228	PCBP2
201260_s_at	-1.17535	10.7028	-9.2121	9.03947e-06	0.000662228	SYPL1
242078_at	-1.50595	5.32869	-9.19543	9.17056e-06	0.000669167	AFF3
201678_s_at	1.89461	8.03157	9.19434	9.17925e-06	0.000669167	C3orf37
225414_at	1.79918	8.41658	9.18837	9.22675e-06	0.000671734	RNF149
1555370_a_at	-2.13742	5.23019	-9.17785	9.31107e-06	0.000675202	CAMTA1
220731_s_at	-1.29737	9.8441	-9.17475	9.33612e-06	0.000675202	NECAP2
235372_at	1.94233	9.26229	9.17126	9.36432e-06	0.000676347	FCRLA
217859_s_at	1.87273	4.56316	9.16577	9.409e-06	0.000678238	SLC39A9
220116_at	-2.4091	4.46759	-9.16491	9.41601e-06	0.000678238	KCNN2
228032_s_at	-2.62808	6.55924	-9.1156	9.82806e-06	0.000703337	DENND1B
218319_at	1.3566	9.86315	9.09894	9.97169e-06	0.000712683	PELI1
215305_at	-1.19869	5.47004	-9.08739	1.00727e-05	0.000718962	PDGFRA
203438_at	1.64759	5.05763	9.07481	1.01839e-05	0.000725952	STC2
224906_at	1.2906	8.42289	9.06705	1.02533e-05	0.000729759	ANO6
213734_at	-1.0665	8.81069	-9.06585	1.0264e-05	0.000729759	RFC5
227141_at	1.51289	9.21852	9.06294	1.02902e-05	0.000730669	TYW3
210631_at	1.18825	4.20602	9.05848	1.03304e-05	0.000732574	NF1
235400_at	3.2167	7.05065	9.04909	1.04157e-05	0.000737664	FCRLA
209277_at	-5.01326	6.72398	-9.04141	1.0486e-05	0.000741686	TFPI2
212203_x_at	1.83923	10.4066	9.03853	1.05125e-05	0.0007426	IFITM3
229648_at	-3.02645	5.78194	-9.02666	1.06226e-05	0.000749404	ARHGAP32
244352_at	-2.07461	7.26768	-9.00702	1.08074e-05	0.000760466	CD84
201350_at	-1.22731	8.26056	-9.00266	1.08489e-05	0.000760466	FLOT2
219358_s_at	-1.30095	6.41727	-8.99482	1.09239e-05	0.000763768	ADAP2
202732_at	-2.47246	9.57846	-8.98186	1.10494e-05	0.000771552	PKIG
1552648_a_at	-1.07938	7.06169	-8.9751	1.11155e-05	0.000774188	TNFRSF10A
201380_at	-1.6211	6.9091	-8.96828	1.11825e-05	0.000777864	CRTAP
241879_at	-2.30246	5.30606	-8.95725	1.12919e-05	0.000783485	LPP
1554258_a_at	-2.13497	6.34046	-8.95384	1.13259e-05	0.000784848	DNAJC5B
203723_at	-1.58943	8.35077	-8.94741	1.13905e-05	0.000787324	ITPKB
200644_at	1.21992	10.0785	8.9412	1.14532e-05	0.000789667	MARCKSL1
212254_s_at	1.61945	6.39612	8.93875	1.1478e-05	0.000790378	DST
203185_at	-1.15744	9.70804	-8.93692	1.14967e-05	0.000790669	RASSF2
220246_at	-1.65935	6.90881	-8.92848	1.15829e-05	0.000795595	CAMK1D
1564276_at	1.57484	4.4636	8.91983	1.1672e-05	0.000799706	C5orf56
204415_at	2.1916	7.89949	8.91431	1.17293e-05	0.000802626	IFI6
219722_s_at	-1.07493	6.36633	-8.9105	1.1769e-05	0.00080333	GDPD3
202304_at	1.40169	8.94065	8.88799	1.20065e-05	0.000815475	FNDC3A
226702_at	4.14798	6.25002	8.86675	1.22356e-05	0.000828972	CMPK2
203283_s_at	1.37951	6.9236	8.85728	1.23392e-05	0.000833929	HS2ST1
208376_at	-1.31926	5.2173	-8.83823	1.25507e-05	0.000846015	CCR4
229310_at	2.53194	6.1687	8.837	1.25645e-05	0.000846015	KLHL29
209603_at	-1.69119	5.48839	-8.82714	1.26757e-05	0.000850993	GATA3
214329_x_at	1.78455	6.54646	8.82631	1.26851e-05	0.000850993	TNFSF10
209717_at	-1.18149	7.1882	-8.82129	1.27422e-05	0.000853773	EVI5
238787_at	-2.20998	5.55965	-8.80563	1.29221e-05	0.000862655	DENND1B
209243_s_at	-1.08749	3.78019	-8.79219	1.30786e-05	0.00087098	PEG3
215016_x_at	1.86544	6.3279	8.78086	1.32123e-05	0.000876593	DST
206637_at	-4.2371	6.3024	-8.77962	1.3227e-05	0.000876593	P2RY14
204925_at	-1.27716	7.18424	-8.77351	1.32997e-05	0.000879279	CTNS
212208_at	-1.55971	7.6929	-8.76692	1.33788e-05	0.00088344	MED13L
234987_at	1.71279	7.36632	8.74504	1.36448e-05	0.000896668	SAMHD1
202382_s_at	1.18426	7.39927	8.73606	1.37557e-05	0.00090287	GNPDA1
228314_at	-1.4219	7.65142	-8.72993	1.38319e-05	0.000903897	LRRC8C
38671_at	-1.71538	7.33787	-8.72724	1.38655e-05	0.000903897	PLXND1
236854_at	-1.21463	6.21089	-8.72684	1.38705e-05	0.000903897	LINC00494
203325_s_at	1.69077	5.31155	8.71685	1.39962e-05	0.000909918	COL5A1
226435_at	1.62697	5.45412	8.71519	1.40172e-05	0.000910202	PAPLN
214761_at	-2.43117	5.14031	-8.69965	1.42154e-05	0.000919105	ZNF423
206106_at	1.00126	5.79512	8.69725	1.42464e-05	0.000919626	MAPK12
223278_at	-3.64032	5.70756	-8.6923	1.43104e-05	0.000922665	GJB2
203010_at	-1.37406	9.20105	-8.68906	1.43524e-05	0.000924282	STAT5A
202446_s_at	2.07883	9.00221	8.68358	1.44238e-05	0.000927791	PLSCR1
222062_at	1.36766	7.77649	8.67994	1.44714e-05	0.000929755	IL27RA
228087_at	-2.41812	8.01685	-8.6781	1.44956e-05	0.000930221	CCDC126
204334_at	-1.73406	8.30611	-8.674	1.45495e-05	0.000932586	KLF7
210705_s_at	1.69861	7.8292	8.67178	1.45789e-05	0.000933374	TRIM5
211372_s_at	2.13649	5.09886	8.66487	1.46706e-05	0.000938145	IL1R2
206518_s_at	-1.60577	4.55127	-8.65991	1.47368e-05	0.000941277	RGS9
229492_at	1.2118	4.85803	8.6585	1.47557e-05	0.000941385	VANGL1
219330_at	1.72206	4.70215	8.65676	1.4779e-05	0.000941577	VANGL1
1569157_s_at	-1.55449	6.36967	-8.63899	1.50197e-05	0.000951564	ZNF846
227829_at	-1.25917	6.93778	-8.61367	1.53701e-05	0.000969271	GYLTL1B
208436_s_at	2.25151	8.21089	8.60386	1.55082e-05	0.000976855	IRF7
217118_s_at	1.10021	8.13417	8.58717	1.57465e-05	0.000989588	KIAA0930
218801_at	1.47789	5.62266	8.5812	1.58327e-05	0.00099386	UGGT2
203935_at	-2.21481	6.71734	-8.57262	1.59574e-05	0.000999395	ACVR1
226065_at	1.4354	6.60074	8.56924	1.60069e-05	0.00100134	PRICKLE1
207072_at	2.83873	5.63268	8.55818	1.61699e-05	0.00100924	IL18RAP
209481_at	-1.09849	9.3853	-8.55068	1.62815e-05	0.00101185	SNRK
242234_at	2.1126	5.34353	8.54805	1.63209e-05	0.00101288	XAF1
203349_s_at	1.61523	5.58816	8.54628	1.63474e-05	0.00101337	ETV5
213107_at	2.63478	6.01753	8.5314	1.65723e-05	0.00102267	TNIK
230904_at	2.35887	5.67152	8.52697	1.66399e-05	0.00102569	FSD1L
205297_s_at	-1.31898	10.2058	-8.5217	1.67208e-05	0.00102836	CD79B
214721_x_at	1.4242	5.64543	8.51582	1.68115e-05	0.00103161	CDC42EP4
223686_at	1.66191	6.42002	8.51301	1.68551e-05	0.00103203	TPK1
227053_at	-1.30156	5.42387	-8.51295	1.6856e-05	0.00103203	PACSIN1
205450_at	-1.43247	5.82984	-8.50753	1.69404e-05	0.00103495	PHKA1
33197_at	-1.27343	5.44276	-8.50341	1.70047e-05	0.00103755	MYO7A
224484_s_at	1.60927	5.68515	8.50231	1.7022e-05	0.00103755	BRMS1L
207057_at	1.12023	6.6702	8.49767	1.70949e-05	0.00104083	SLC16A7
212312_at	-1.19254	8.64267	-8.49472	1.71415e-05	0.0010425	BCL2L1
206244_at	1.40457	5.23221	8.48531	1.7291e-05	0.00105043	CR1
204891_s_at	1.64314	8.65222	8.48384	1.73144e-05	0.00105068	LCK
239898_x_at	-1.34919	6.50873	-8.47884	1.73945e-05	0.00105438	ZNF286A
209679_s_at	-1.54012	6.28267	-8.47686	1.74265e-05	0.00105514	SMAGP
208524_at	1.85925	5.24582	8.46915	1.75511e-05	0.00106034	GPR15
228011_at	1.65132	5.69095	8.46762	1.75759e-05	0.00106067	FAM92A1
219928_s_at	-1.2045	5.54607	-8.43175	1.81697e-05	0.00109288	CABYR
222453_at	3.06696	5.7458	8.43046	1.81914e-05	0.00109298	CYBRD1
201308_s_at	1.49352	4.8767	8.42367	1.83064e-05	0.00109628	2013-09-11
233230_s_at	1.04613	5.00833	8.414	1.84715e-05	0.00110328	SLAIN2
226560_at	2.77056	7.75049	8.41276	1.84928e-05	0.00110328	SGPP2
205903_s_at	2.91561	5.51362	8.41211	1.85041e-05	0.00110328	KCNN3
226695_at	1.86355	5.06702	8.40752	1.85832e-05	0.0011058	PRRX1
226564_at	1.29902	7.45895	8.40732	1.85867e-05	0.0011058	ZFAT
214211_at	1.74537	9.03595	8.40582	1.86127e-05	0.00110614	FTH1
206513_at	1.51614	7.71168	8.39594	1.87844e-05	0.00111391	AIM2
235139_at	1.10003	6.4134	8.39357	1.88259e-05	0.00111391	GNGT2
219696_at	-2.51619	7.41262	-8.39356	1.88262e-05	0.00111391	DENND1B
221218_s_at	1.25728	7.53152	8.39308	1.88345e-05	0.00111391	TPK1
212458_at	-1.38146	6.86487	-8.39247	1.88454e-05	0.00111391	SPRED2
213050_at	-1.53362	5.11066	-8.38712	1.89394e-05	0.00111826	COBL
223709_s_at	2.12189	6.76399	8.38313	1.90099e-05	0.00112122	WNT10A
212609_s_at	-1.44475	7.77926	-8.37026	1.92396e-05	0.00113354	AKT3
203474_at	1.6384	7.76931	8.36098	1.9407e-05	0.00113996	IQGAP2
206018_at	-2.16446	4.90009	-8.32863	2.00032e-05	0.00116708	FOXG1
225922_at	3.9608	5.61005	8.32725	2.00292e-05	0.00116708	FNIP2
204115_at	-3.37562	7.54938	-8.32421	2.00863e-05	0.00116708	GNG11
202950_at	2.58742	9.45817	8.31654	2.02313e-05	0.00117052	CRYZ
226612_at	2.00969	5.34648	8.31357	2.02878e-05	0.00117255	UBE2QL1
1557458_s_at	-1.3306	5.57621	-8.31143	2.03286e-05	0.00117367	SHB
215071_s_at	3.29029	7.3361	8.28458	2.0848e-05	0.00119986	HIST1H2AC
206756_at	1.32434	6.72615	8.28322	2.08747e-05	0.00120013	CHST7
230425_at	-2.31116	7.28115	-8.27445	2.10477e-05	0.00120754	EPHB1
218100_s_at	-1.30796	9.66168	-8.26518	2.12323e-05	0.00121685	IFT57
201700_at	-1.09669	9.34426	-8.26377	2.12608e-05	0.00121721	CCND3
209323_at	-1.03958	9.96949	-8.25526	2.1432e-05	0.00122447	PRKRIR
213996_at	-1.69804	6.05145	-8.25155	2.15071e-05	0.00122745	YPEL1
210904_s_at	-4.14344	5.86871	-8.24575	2.16253e-05	0.00123291	IL13RA1
221029_s_at	1.28185	5.53837	8.24031	2.17368e-05	0.00123798	WNT5B
211581_x_at	-1.59335	7.23304	-8.23883	2.17671e-05	0.00123841	LST1
206394_at	-1.55612	5.50529	-8.236	2.18254e-05	0.00124044	MYBPC2
226878_at	-1.45055	9.12708	-8.23182	2.19119e-05	0.00124278	HLA-DOA
211162_x_at	1.32281	5.6808	8.22995	2.19506e-05	0.00124368	SCD
213109_at	1.77871	6.23272	8.22196	2.21173e-05	0.00125182	TNIK
207904_s_at	1.11697	6.06131	8.20922	2.23859e-05	0.00126423	LNPEP
204389_at	-1.89237	4.49724	-8.20666	2.24402e-05	0.00126423	MAOA
209340_at	1.03055	8.89691	8.2061	2.24521e-05	0.00126423	UAP1
218603_at	-1.66689	9.42613	-8.19241	2.27455e-05	0.00127812	HECA
203431_s_at	-2.92973	5.98786	-8.17987	2.30182e-05	0.00129212	ARHGAP32
225352_at	1.34929	9.00835	8.16587	2.33267e-05	0.00130275	SEC62
226948_at	1.05935	6.26201	8.16431	2.33615e-05	0.00130336	RHBDD1
211986_at	-1.38753	8.80593	-8.15679	2.35294e-05	0.00130872	AHNAK
208703_s_at	-1.46137	7.73742	-8.15216	2.36334e-05	0.00131183	APLP2
227983_at	1.22427	10.1119	8.14959	2.36913e-05	0.00131371	RILPL2
216020_at	1.26013	4.7984	8.14273	2.38469e-05	0.00131833	IFIH1
203562_at	3.9874	6.0814	8.14127	2.38801e-05	0.00131883	FEZ1
219431_at	1.33299	5.99386	8.13524	2.4018e-05	0.00132511	ARHGAP10
204972_at	2.52494	7.50882	8.13377	2.40516e-05	0.00132563	OAS2
224285_at	-1.55058	4.67618	-8.1129	2.45362e-05	0.00134961	GPR174
204794_at	1.91925	9.34955	8.10693	2.46767e-05	0.0013518	DUSP2
212736_at	-1.16709	6.3302	-8.10637	2.469e-05	0.0013518	C16orf45
221078_s_at	1.20062	5.95083	8.10539	2.47131e-05	0.0013518	CCDC88A
203680_at	-1.87447	4.78684	-8.10513	2.47194e-05	0.0013518	PRKAR2B
225291_at	1.15384	8.83413	8.10478	2.47277e-05	0.0013518	PNPT1
201601_x_at	2.79656	9.78266	8.10263	2.47786e-05	0.0013518	IFITM1
205192_at	-1.0128	7.53449	-8.10179	2.47985e-05	0.0013518	MAP3K14
217901_at	2.37252	4.87468	8.09931	2.48576e-05	0.00135233	DSG2
202242_at	-1.15715	5.09095	-8.09563	2.49453e-05	0.00135575	TSPAN7
1552344_s_at	1.00396	7.21014	8.08291	2.52516e-05	0.00136945	CNOT7
209210_s_at	1.6843	4.84736	8.08192	2.52754e-05	0.00136945	FERMT2
218450_at	-2.5735	6.95719	-8.08055	2.53087e-05	0.00136945	HEBP1
214455_at	3.02139	4.83666	8.05457	2.59484e-05	0.00140052	HIST1H2BC
205613_at	-1.22703	6.94298	-8.03795	2.63673e-05	0.00142033	SYT17
217853_at	-1.43304	8.25992	-8.02643	2.66618e-05	0.00143195	TNS3
216733_s_at	2.62783	8.57765	8.02542	2.66878e-05	0.00143195	GATM
204882_at	-2.58555	8.57241	-8.01645	2.69197e-05	0.00143938	ARHGAP25
236266_at	1.98241	5.12757	8.016	2.69316e-05	0.00143938	RORA
210791_s_at	-1.83899	5.8483	-8.00916	2.711e-05	0.0014475	ARHGAP32
208942_s_at	1.146	10.5115	8.00643	2.71818e-05	0.00144992	SEC62
206133_at	2.12723	7.5189	8.00377	2.72516e-05	0.00145065	XAF1
212607_at	-1.21948	7.50556	-8.00279	2.72777e-05	0.00145065	AKT3
241342_at	-2.09898	6.4122	-8.00082	2.73296e-05	0.00145065	TMEM65
218943_s_at	1.35368	7.31949	7.99938	2.73677e-05	0.00145065	DDX58
201161_s_at	1.24756	9.69335	7.99887	2.73813e-05	0.00145065	CSDA
227436_at	1.01835	6.60097	7.98565	2.77338e-05	0.00146507	OTUD7B
205749_at	-1.9138	6.15273	-7.97204	2.81022e-05	0.00148024	CYP1A1
244565_at	3.90959	5.36082	7.96362	2.83329e-05	0.00148809	HMX2
205746_s_at	1.41288	5.95773	7.95773	2.84953e-05	0.00149437	ADAM17
1552386_at	-2.21353	5.82846	-7.95533	2.85618e-05	0.00149437	GAPT
236328_at	-1.19761	6.11314	-7.93204	2.92163e-05	0.00152279	ZNF285
204385_at	-1.03047	8.37217	-7.92377	2.94527e-05	0.00153364	KYNU
223422_s_at	-1.94489	8.33208	-7.91896	2.9591e-05	0.00153938	ARHGAP24
201315_x_at	1.53529	10.2711	7.91793	2.96207e-05	0.00153946	IFITM2
210629_x_at	-1.23563	6.7693	-7.91024	2.98437e-05	0.00154849	LST1
207339_s_at	-2.16364	10.4162	-7.90633	2.99578e-05	0.00154857	LTB
235911_at	-1.416	8.10385	-7.90573	2.99755e-05	0.00154857	MFI2
222793_at	1.3455	6.32939	7.90406	3.00246e-05	0.00154857	DDX58
1563369_at	-1.25965	5.37037	-7.89177	3.03872e-05	0.00156443	LINC00173
212676_at	1.14548	7.31619	7.88966	3.04499e-05	0.00156524	NF1
204671_s_at	-1.84941	6.5739	-7.8755	3.08747e-05	0.00157949	ANKRD6
228617_at	2.388	8.61271	7.87478	3.08965e-05	0.00157949	XAF1
209677_at	-1.07175	4.73224	-7.87431	3.09109e-05	0.00157949	PRKCI
207568_at	-1.88798	6.39368	-7.87256	3.09639e-05	0.00157963	CHRNA6
219501_at	-1.38583	5.17991	-7.87231	3.09715e-05	0.00157963	ENOX1
202761_s_at	1.70054	8.25222	7.86945	3.10584e-05	0.00158259	SYNE2
205552_s_at	2.42983	7.27992	7.86072	3.13252e-05	0.00158878	OAS1
202724_s_at	-1.40802	9.21448	-7.85827	3.14006e-05	0.00158966	FOXO1
226069_at	1.41871	5.42992	7.85595	3.14723e-05	0.00159181	PRICKLE1
205884_at	2.03876	7.14888	7.85312	3.15597e-05	0.00159476	ITGA4
202897_at	-2.25076	7.11176	-7.8447	3.18217e-05	0.00160355	SIRPA
210044_s_at	-1.536	8.03441	-7.84052	3.19526e-05	0.0016057	LYL1
238022_at	-1.17194	5.07606	-3.71044	0.00515677	0.0499927	CRNDE
231442_at	1.47544	4.52571	7.83947	3.19856e-05	0.00160589	ZPBP2
220068_at	-2.05598	8.19388	-7.83699	3.20637e-05	0.00160833	VPREB3
209988_s_at	2.7135	5.05791	7.83486	3.21308e-05	0.00161022	ASCL1
227506_at	1.31324	5.40246	3.71399	0.00512912	0.0498543	SLC16A9
204807_at	1.04284	6.74854	3.71995	0.00508309	0.0495663	TMEM5
204897_at	-3.09594	9.32768	-7.82506	3.24423e-05	0.00162021	PTGER4
202436_s_at	1.76768	6.71007	3.72529	0.00504223	0.0492983	CYP1B1
218418_s_at	1.53473	6.68782	7.81222	3.2855e-05	0.00163751	KANK2
232201_at	-1.12646	5.96705	-7.80954	3.29418e-05	0.00164012	NKD2
224810_s_at	-1.14497	11.0271	-7.80857	3.29736e-05	0.00164012	ANKRD13A
212730_at	1.359	5.51704	3.7313	0.00499668	0.0490147	SYNM
212510_at	-1.47231	7.30825	-7.80783	3.29974e-05	0.00164012	GPD1L
224802_at	1.03686	7.3866	3.73298	0.00498398	0.0489402	NDFIP2
226274_at	-1.24016	6.57251	-7.80548	3.30741e-05	0.00164149	CLCN5
214181_x_at	-1.85241	7.38371	-7.80496	3.3091e-05	0.00164149	LST1
202723_s_at	-1.30086	8.57627	-7.80423	3.3115e-05	0.00164149	FOXO1
242887_at	1.13016	5.50095	3.73501	0.00496877	0.0488594	KCMF1
205569_at	1.82675	7.91774	3.73916	0.00493773	0.0486589	LAMP3
244623_at	1.55459	7.18515	7.79596	3.3386e-05	0.00164894	KCNQ5
1569190_at	1.01046	6.28981	3.73955	0.00493481	0.0486496	SCLT1
222653_at	1.11297	7.20781	7.78193	3.38521e-05	0.00166594	PNPO
215011_at	1.28475	6.42294	3.75064	0.00485295	0.0481028	SNHG3
221563_at	1.4288	9.33645	3.7553	0.00481898	0.0479225	DUSP10
203471_s_at	1.72018	9.21806	7.76946	3.42722e-05	0.00168208	PLEK
1553436_at	3.16813	5.05162	7.76823	3.43138e-05	0.00168261	MUC19
221880_s_at	1.36479	6.05189	3.76002	0.00478483	0.0477741	FAM174B
219574_at	1.21466	6.18602	3.76006	0.00478453	0.0477741	2013-03-01
203210_s_at	-1.1916	7.64648	-7.7584	3.46495e-05	0.00169754	RFC5
236539_at	1.27086	8.02347	7.75664	3.47101e-05	0.00169899	PTPN22
1553311_at	1.37633	3.60429	3.76552	0.00474535	0.0475249	C20orf197
211113_s_at	1.04385	6.39014	3.77053	0.00470971	0.0472744	ABCG1
218503_at	1.21184	7.71261	7.74167	3.52293e-05	0.00171979	FOCAD
228262_at	1.0573	4.71348	3.77558	0.00467404	0.0470521	MAP7D2
203328_x_at	1.09878	7.30125	7.73918	3.53163e-05	0.0017212	IDE
219594_at	1.90445	6.22979	7.73725	3.53841e-05	0.0017212	NINJ2
218999_at	1.24053	7.16289	3.78066	0.0046385	0.0468433	TMEM140
1555420_a_at	-1.09808	6.77887	-3.7808	0.00463747	0.0468421	KLF7
227345_at	-1.07143	6.7007	-3.78146	0.00463292	0.0468216	TNFRSF10D
202068_s_at	1.16719	7.30675	3.78421	0.00461379	0.0467146	LDLR
243334_at	-1.2626	5.00479	-3.78656	0.00459755	0.0465934	CACNA1D
226757_at	1.78085	7.56047	7.72438	3.58395e-05	0.00173563	IFIT2
221841_s_at	-2.73815	5.63185	-3.79044	0.00457082	0.0464171	KLF4
209398_at	3.24233	8.61707	7.71533	3.61633e-05	0.00174976	HIST1H1C
209417_s_at	1.2416	8.04657	7.71362	3.62249e-05	0.00175077	IFI35
203509_at	1.74867	9.64288	7.71298	3.62482e-05	0.00175077	SORL1
204802_at	1.00694	5.09397	3.79483	0.00454078	0.0462064	RRAD
241371_at	-1.16496	6.31325	-7.69984	3.67255e-05	0.0017707	TNFRSF10A
226576_at	1.68719	5.41056	7.6978	3.68002e-05	0.00177179	ARHGAP26
205068_s_at	1.26117	6.57203	7.69578	3.68746e-05	0.00177179	ARHGAP26
222071_s_at	2.66857	4.51839	7.69254	3.69937e-05	0.00177451	SLCO4C1
221081_s_at	1.01011	8.53953	3.80858	0.00444799	0.045559	DENND2D
207691_x_at	1.02027	7.83778	3.81016	0.0044375	0.0455026	ENTPD1
219396_s_at	-1.79886	7.53303	-7.68886	3.713e-05	0.00177699	NEIL1
214009_at	1.30224	6.67759	7.68614	3.72308e-05	0.00177936	MSL3
205349_at	1.06197	6.58611	3.81432	0.00440991	0.0453218	GNA15
216620_s_at	-1.6098	6.44352	-7.68373	3.73205e-05	0.00178111	ARHGEF10
204890_s_at	1.5787	7.16279	7.68304	3.73462e-05	0.00178111	LCK
1555388_s_at	1.24624	8.13042	7.68253	3.73651e-05	0.00178111	SNX25
218717_s_at	2.19142	5.02125	7.67655	3.75891e-05	0.00178409	LEPREL1
220084_at	1.94842	3.6417	7.6765	3.75907e-05	0.00178409	C14orf105
217594_at	-1.4302	5.47952	-3.8219	0.00436006	0.0449531	ZCCHC11
232024_at	1.00869	8.39705	3.82265	0.00435517	0.0449196	GIMAP2
203196_at	1.13509	7.55334	3.82998	0.00430761	0.0445467	ABCC4
203773_x_at	1.03622	8.86878	7.65889	3.82585e-05	0.00180638	BLVRA
200998_s_at	1.1781	7.6184	3.83373	0.00428352	0.044369	CKAP4
217496_s_at	1.10178	7.50739	7.64926	3.86294e-05	0.00182099	IDE
226147_s_at	2.30751	6.8657	7.64912	3.86347e-05	0.00182099	PIGR
224156_x_at	-2.00978	7.99713	-3.83944	0.00424706	0.0441041	IL17RB
218971_s_at	-1.08764	8.50881	-7.64469	3.88067e-05	0.00182595	WDR91
210895_s_at	-1.23377	9.37405	-3.84185	0.00423181	0.0440126	CD86
209806_at	2.85023	10.0161	7.64168	3.89238e-05	0.00182883	HIST1H2BK
200866_s_at	1.25394	8.83248	7.6414	3.89348e-05	0.00182883	PSAP
223615_at	1.16261	6.84191	7.63852	3.90473e-05	0.00183254	ABI3
224361_s_at	-1.93432	7.87671	-3.84615	0.00420465	0.043872	IL17RB
1554918_a_at	1.64698	5.47534	7.63308	3.92609e-05	0.00184053	ABCC4
207608_x_at	-1.08716	7.12499	-7.6321	3.92997e-05	0.00184053	CYP1A2
213797_at	1.92524	5.08384	7.63162	3.93184e-05	0.00184053	RSAD2
232007_at	2.31101	7.32792	7.62941	3.94059e-05	0.00184297	AGPAT5
214231_s_at	1.46701	5.74672	7.62779	3.94698e-05	0.00184297	VWA8
215146_s_at	-2.34233	5.33425	-3.85273	0.00416356	0.0435233	TTC28
209602_s_at	-1.84597	6.06221	-7.62547	3.9562e-05	0.00184448	GATA3
219279_at	-1.13782	9.71732	-7.62523	3.95715e-05	0.00184448	DOCK10
225941_at	-1.25893	5.60149	-7.6198	3.97878e-05	0.00184826	EIF4E3
211559_s_at	-1.54282	7.8646	-3.85891	0.00412528	0.0432933	CCNG2
238440_at	-1.24808	7.01972	-3.86024	0.00411711	0.0432641	CLYBL
204422_s_at	1.22474	4.13355	3.86165	0.00410843	0.0431979	FGF2
1563638_at	-1.68948	5.40027	-7.61045	4.01636e-05	0.00186292	FAM18A
224367_at	-1.88372	9.15913	-7.61025	4.01716e-05	0.00186292	BEX2
208744_x_at	1.0874	7.86003	3.86548	0.00408504	0.043018	HSPH1
214464_at	1.25055	4.99067	7.60682	4.03106e-05	0.00186778	CDC42BPA
201259_s_at	-1.13754	9.78313	-7.6025	4.04861e-05	0.00187324	SYPL1
226436_at	1.48007	6.69205	7.59904	4.06273e-05	0.0018761	RASSF4
221584_s_at	-2.10974	6.18922	-3.87219	0.00404431	0.0427164	KCNMA1
1555486_a_at	-2.23774	6.20445	-7.59778	4.06789e-05	0.00187689	PRR5L
224829_at	1.56807	7.2666	7.59527	4.07818e-05	0.00188006	CPEB4
1561853_a_at	1.84965	4.46212	3.87673	0.00401706	0.042548	IL23R
219255_x_at	-2.02104	7.80924	-3.87803	0.00400925	0.0425065	IL17RB
218935_at	-1.17351	6.83467	-3.87881	0.00400462	0.0424821	EHD3
224209_s_at	1.73943	4.28899	3.88388	0.00397446	0.0422523	GDA
222067_x_at	1.16085	7.50551	3.88393	0.00397415	0.0422523	HIST1H2BD
219366_at	1.20561	7.78542	7.57859	4.14733e-05	0.00190231	AVEN
242439_s_at	-1.50171	7.51772	-3.89273	0.00392246	0.0418434	ASXL1
204935_at	1.5747	5.0187	7.5656	4.20206e-05	0.00192097	PTPN2
230888_at	-1.12954	7.14874	-3.89709	0.00389705	0.0416399	WDR91
209815_at	1.27223	5.8162	3.89761	0.00389404	0.0416158	PTCH1
235117_at	1.19835	8.03891	3.89865	0.00388804	0.041568	CHAC2
202859_x_at	3.05613	5.79438	3.8988	0.00388715	0.0415666	IL8
205479_s_at	-1.39503	6.08928	-7.55926	4.22906e-05	0.00192965	PLAU
214472_at	1.5784	5.41469	3.89919	0.00388493	0.0415646	HIST1H3D
228033_at	1.01775	6.67526	7.55866	4.23164e-05	0.00192965	E2F7
212614_at	-1.44936	9.94253	-7.55773	4.2356e-05	0.00192985	ARID5B
206235_at	1.14327	5.97961	7.54842	4.2757e-05	0.00194149	LIG4
220000_at	-1.48161	6.08038	-7.54413	4.29428e-05	0.00194223	SIGLEC5
206662_at	1.24036	9.22236	3.90993	0.0038234	0.0411666	GLRX
218477_at	-1.08362	9.39182	-3.91091	0.00381782	0.041139	TMEM14A
205698_s_at	1.06302	7.80208	3.91256	0.00380843	0.0410784	MAP2K6
227224_at	-1.56399	9.001	-3.9129	0.00380652	0.0410658	RALGPS2
203708_at	1.30124	9.41405	3.91438	0.00379816	0.041016	PDE4B
227041_at	-1.75454	7.02541	-7.53333	4.34152e-05	0.00196014	SESTD1
237759_at	1.09835	7.10922	3.91964	0.00376863	0.0408019	CD48
224735_at	-1.01762	9.23464	-7.52848	4.36292e-05	0.00196607	CYBASC3
205427_at	-1.03916	7.57279	-7.52811	4.36455e-05	0.00196607	ZNF354A
218501_at	-1.51032	8.6311	-7.52791	4.36546e-05	0.00196607	ARHGEF3
202869_at	2.28578	7.54678	7.5218	4.39256e-05	0.00197665	OAS1
203817_at	2.44229	5.66434	3.92623	0.00373195	0.040485	GUCY1B3
229302_at	-1.91283	4.789	-7.51776	4.41063e-05	0.00198152	TMEM178A
223209_s_at	1.28362	9.07317	3.92912	0.00371597	0.0403558	VIMP
1552912_a_at	2.48946	4.06951	3.93247	0.00369758	0.0402238	IL23R
223179_at	-1.16556	8.38985	-3.93589	0.00367883	0.0400916	YPEL3
201387_s_at	2.18317	5.93507	3.93684	0.0036737	0.0400438	UCHL1
213638_at	1.02874	7.84076	3.93937	0.00365991	0.0399014	PHACTR1
212314_at	-1.27845	10.2609	-3.94359	0.00363709	0.039716	SEL1L3
59625_at	1.00516	5.69501	3.94504	0.0036293	0.0396864	NOL3
203030_s_at	-1.43206	6.25163	-7.49137	4.53052e-05	0.00203167	PTPRN2
238722_x_at	1.1697	6.01805	3.95097	0.00359759	0.039466	NAPEPLD
235567_at	1.97731	5.10944	7.48284	4.57004e-05	0.00204419	RORA
222908_at	2.61295	5.15206	3.95381	0.00358247	0.0393486	PIEZO2
224482_s_at	-1.81253	6.40652	-7.47903	4.5878e-05	0.00204766	RAB11FIP4
214599_at	1.17622	5.4516	3.95669	0.00356724	0.0392885	IVL
217911_s_at	-2.66721	7.13425	-7.47199	4.62086e-05	0.00205905	BAG3
205542_at	2.0454	5.46803	3.96193	0.00353971	0.0390898	STEAP1
227408_s_at	1.13202	9.34762	7.46839	4.63787e-05	0.00206495	SNX25
212688_at	1.00931	7.50409	7.4613	4.67152e-05	0.00207824	PIK3CB
38149_at	-2.66061	8.6601	-7.45864	4.68425e-05	0.00208221	ARHGAP25
204786_s_at	1.07277	8.04479	3.97004	0.0034975	0.0387882	IFNAR2
220926_s_at	1.02102	7.13207	3.97031	0.00349612	0.0387808	EDEM3
226991_at	-1.34584	8.49053	-7.45535	4.70001e-05	0.00208752	NFATC2
217678_at	3.37394	5.20976	7.45408	4.7061e-05	0.00208852	SLC7A11
225940_at	-1.04805	6.28522	-7.44231	4.76305e-05	0.00210866	EIF4E3
231994_at	-1.40273	6.99549	-3.98152	0.00343871	0.0383383	CHDH
200606_at	-2.53398	5.93737	-3.98606	0.00341578	0.038184	DSP
238007_at	1.00249	5.71424	7.43079	4.81956e-05	0.00213023	ZNF271
225342_at	1.9043	7.29266	3.99433	0.00337436	0.037837	AK4
202435_s_at	1.73735	6.43083	3.99638	0.00336419	0.0377477	CYP1B1
213413_at	-1.58119	4.73221	-7.41646	4.89084e-05	0.00215477	STON1
218584_at	-2.21168	8.43508	-7.40849	4.93101e-05	0.00216595	TCTN1
220987_s_at	-1.56199	7.58637	-7.40681	4.93949e-05	0.00216595	NUAK2
209604_s_at	-1.77489	7.66472	-7.40672	4.93998e-05	0.00216595	GATA3
222392_x_at	-1.44676	6.84172	-4.01016	0.00329656	0.0372955	PERP
241866_at	1.37156	5.31401	7.39913	4.97864e-05	0.00218079	SLC16A7
209921_at	2.95967	5.92296	7.39851	4.98181e-05	0.00218079	SLC7A11
230218_at	1.04742	4.81332	4.01161	0.00328955	0.0372527	HIC1
208683_at	-1.59827	8.98127	-7.39308	5.00965e-05	0.00218947	CAPN2
203455_s_at	1.20093	10.8352	4.01582	0.00326923	0.0371072	SAT1
220993_s_at	1.47779	4.35354	7.39048	5.0231e-05	0.00219359	GPR63
203038_at	-1.71268	6.90007	-4.02132	0.00324289	0.0368694	PTPRK
228680_at	1.10069	7.68613	7.37201	5.11948e-05	0.0022193	KIF3A
201212_at	2.64394	8.43384	7.37143	5.12255e-05	0.0022193	LGMN
225746_at	-1.69364	6.50894	-7.36656	5.14832e-05	0.00222133	RAB11FIP4
225700_at	1.52877	7.1265	7.36402	5.16182e-05	0.00222133	GLCCI1
1552716_at	-1.14511	4.42559	-7.36345	5.16486e-05	0.00222133	SPEF2
203470_s_at	1.51732	8.26389	7.36299	5.16727e-05	0.00222133	PLEK
205933_at	-1.80709	7.45026	-7.35934	5.18676e-05	0.00222595	SETBP1
206653_at	2.25758	6.49216	7.34198	5.28059e-05	0.0022556	POLR3G
206825_at	1.60558	6.76852	7.33986	5.29217e-05	0.00225836	OXTR
242898_at	1.09517	4.83699	7.33928	5.29533e-05	0.00225836	EIF2AK2
232352_at	1.47101	4.88277	7.32891	5.35241e-05	0.00227384	ISL2
207156_at	1.68102	5.35448	7.32798	5.35759e-05	0.00227427	HIST1H2AG
206907_at	2.7349	7.61903	7.32439	5.37755e-05	0.00228097	TNFSF9
202651_at	1.44206	9.21931	7.32346	5.3827e-05	0.00228139	LPGAT1
238423_at	1.50391	6.99223	7.32179	5.39204e-05	0.00228358	SYTL3
225330_at	-1.84363	6.34166	-7.31738	5.41668e-05	0.00229046	IGF1R
200871_s_at	1.3481	10.1249	7.31544	5.42762e-05	0.00229332	PSAP
207734_at	2.02809	6.70996	7.31376	5.43707e-05	0.00229553	LAX1
209911_x_at	2.5073	7.34315	7.31174	5.44846e-05	0.00229857	HIST1H2BD
235964_x_at	1.33675	7.32165	7.30363	5.49445e-05	0.00231128	SAMHD1
218175_at	-1.03976	7.79151	-7.30345	5.49549e-05	0.00231128	CCDC92
223249_at	1.26055	6.91137	4.07913	0.0029793	0.0346729	CLDN12
202688_at	1.55307	7.33705	7.29876	5.52233e-05	0.00232078	TNFSF10
211998_at	-1.33675	9.51073	-4.08347	0.00296043	0.0345328	H3F3B
1552552_s_at	1.09648	3.98159	7.29653	5.5351e-05	0.00232436	CLEC4C
211302_s_at	1.39999	7.37141	4.08437	0.00295657	0.0345038	PDE4B
225373_at	1.0567	6.86783	4.08655	0.00294715	0.0344446	C10orf54
229954_at	-1.80625	6.91082	-4.09545	0.00290909	0.0341099	CHDH
202465_at	-1.06275	6.14246	-4.09665	0.00290401	0.0340722	PCOLCE
212527_at	1.19954	7.59054	7.27771	5.64441e-05	0.00236119	DESI1
213566_at	-1.70426	9.073	-4.09928	0.00289286	0.0339851	RNASE6
212250_at	1.09976	10.4189	7.27226	5.67653e-05	0.00236971	MTDH
209278_s_at	-4.79927	8.22372	-7.27159	5.68049e-05	0.00236971	TFPI2
219433_at	-1.28417	8.34564	-7.27131	5.68211e-05	0.00236971	BCOR
210117_at	1.04027	7.51422	7.26623	5.71224e-05	0.00237926	SPAG1
207651_at	-1.88323	5.20427	-7.26599	5.71371e-05	0.00237926	GPR171
207610_s_at	1.43009	4.41072	4.10963	0.00284951	0.033664	EMR2
226886_at	1.06515	7.95688	7.25903	5.75528e-05	0.00239298	GFPT1
227277_at	1.03237	7.91516	4.11143	0.00284204	0.033583	MTDH
210377_at	1.12282	6.54786	4.11196	0.00283987	0.0335704	ACSM3
217484_at	1.49275	4.82391	7.25407	5.7851e-05	0.00239985	CR1
217783_s_at	-1.19705	10.0147	-4.11433	0.00283006	0.0335066	YPEL5
222693_at	2.19134	4.43257	7.25145	5.80092e-05	0.00240287	FNDC3B
210797_s_at	1.35538	6.05192	7.25141	5.80116e-05	0.00240287	OASL
203910_at	-2.36793	5.45091	-7.2502	5.80852e-05	0.00240399	ARHGAP29
1557049_at	1.57566	5.16397	7.24933	5.81378e-05	0.00240399	BTBD19
200999_s_at	1.39924	9.10855	4.11944	0.00280909	0.0333523	CKAP4
209542_x_at	1.25468	6.11863	4.12592	0.00278271	0.0331325	IGF1
201631_s_at	1.10431	8.43516	7.23378	5.90892e-05	0.00243459	IER3
212560_at	1.64089	10.4029	7.23154	5.92278e-05	0.00243846	SORL1
213793_s_at	1.90475	6.75958	7.23028	5.93059e-05	0.00243984	HOMER1
211382_s_at	-1.14129	4.61124	-4.13149	0.00276021	0.0329364	TACC2
203473_at	1.19908	5.81925	7.22388	5.97041e-05	0.00244885	SLCO2B1
239021_at	1.00913	6.26447	7.21662	6.01594e-05	0.00246015	TLR6
1554079_at	1.52157	5.80052	4.14678	0.00269955	0.0324248	GALNTL4
210108_at	-2.46231	4.94127	-7.20543	6.08682e-05	0.00248334	CACNA1D
204259_at	2.84289	6.45466	7.20479	6.09095e-05	0.00248334	MMP7
232798_at	-2.48931	5.95407	-7.20409	6.09538e-05	0.00248334	DNAJC5B
203395_s_at	1.25806	6.52138	4.15138	0.00268157	0.0322514	HES1
215925_s_at	-1.05916	7.84981	-4.15267	0.00267656	0.0322372	CD72
223492_s_at	-1.17893	8.57121	-4.15309	0.00267491	0.0322372	LRRFIP1
214486_x_at	-1.32975	8.01114	-7.19888	6.12879e-05	0.00248964	CFLAR
228726_at	-2.58476	7.58537	-7.19672	6.1427e-05	0.00248964	SERPINB1
242009_at	1.18849	3.54062	7.1946	6.15632e-05	0.00249122	SLC6A4
228857_at	-1.01058	6.5801	-4.16136	0.00264302	0.0319898	GNL1
219944_at	1.69752	5.56535	4.16186	0.00264108	0.0319787	CLIP4
210762_s_at	-1.21612	4.92166	-4.16304	0.00263659	0.0319415	DLC1
217478_s_at	-1.75262	10.9546	-7.17937	6.25559e-05	0.00252044	HLA-DMA
213572_s_at	-2.55736	8.8928	-7.17725	6.26954e-05	0.00252266	SERPINB1
210426_x_at	2.33441	6.06538	7.16969	6.3196e-05	0.00253875	RORA
214769_at	-2.06791	5.70799	-4.17822	0.00257921	0.0314281	CLCN4
228167_at	-1.15339	8.26525	-4.17905	0.00257612	0.0314045	KLHL6
200987_x_at	1.03184	8.06143	4.18003	0.00257245	0.0313668	PSME3
208523_x_at	1.3112	6.69052	4.18124	0.00256796	0.031333	HIST1H2BI
202558_s_at	1.23452	6.91442	4.18227	0.00256412	0.0313258	HSPA13
222587_s_at	1.04398	7.78276	4.18409	0.00255738	0.0312857	GALNT7
204620_s_at	1.939	4.65187	4.18502	0.00255394	0.031261	VCAN
223751_x_at	1.22941	8.58081	4.18899	0.00253933	0.0311566	TLR10
1553106_at	1.00254	5.2099	4.19243	0.0025267	0.0310513	C5orf24
242020_s_at	1.6696	6.08882	4.19382	0.00252162	0.0310029	ZBP1
223253_at	1.81736	5.3773	4.19716	0.00250949	0.0308885	EPDR1
228253_at	-1.03931	6.60669	-4.19823	0.00250562	0.0308484	LOXL3
226433_at	2.03794	5.87453	7.13785	6.53516e-05	0.00261155	RNF157
228568_at	-1.7944	6.39454	-7.13759	6.53694e-05	0.00261155	GCOM1
205434_s_at	1.37637	7.47778	7.13659	6.54381e-05	0.00261155	AAK1
214845_s_at	1.01259	6.30475	4.20117	0.00249498	0.0307722	CALU
211596_s_at	1.14146	8.01309	4.20357	0.00248636	0.0306936	LRIG1
222642_s_at	1.26482	7.0863	7.12949	6.59305e-05	0.00262354	TMEM33
206150_at	1.25755	8.65842	4.20751	0.00247225	0.0305815	CD27
227166_at	-1.37002	7.10742	-7.12449	6.62799e-05	0.00262997	DNAJC18
214039_s_at	2.24626	8.19902	4.20935	0.00246569	0.0305512	LAPTM4B
209879_at	1.19195	6.70056	4.212	0.00245626	0.0304817	SELPLG
220001_at	-1.30327	4.73031	-7.11583	6.68895e-05	0.00264569	PADI4
225163_at	2.93662	5.46807	7.11536	6.69225e-05	0.00264569	FRMD4A
201403_s_at	-1.17649	9.59546	-7.10915	6.73641e-05	0.0026593	MGST3
211936_at	1.07678	11.3897	4.22149	0.00242286	0.0302097	HSPA5
218613_at	-2.0364	5.62054	-7.10699	6.75183e-05	0.00266254	PSD3
223834_at	1.3638	5.81489	7.10291	6.78107e-05	0.00266922	CD274
228377_at	-1.28408	7.77513	-4.22674	0.00240461	0.0300783	KLHL14
219271_at	-1.31766	5.99712	-4.22894	0.00239699	0.030031	GALNT14
205660_at	1.93172	5.65961	7.09611	6.83011e-05	0.00268081	OASL
219467_at	1.10024	7.12268	4.23155	0.00238801	0.0299666	GIN1
209368_at	1.14548	5.25717	4.23581	0.00237339	0.0298448	EPHX2
200889_s_at	1.03234	8.76675	4.23745	0.00236778	0.0297948	SSR1
206032_at	1.38614	4.08127	4.23767	0.00236706	0.0297948	DSC3
215440_s_at	-2.00503	8.32215	-4.23805	0.00236576	0.0297899	BEX4
210073_at	-1.61734	3.76312	-4.23887	0.00236296	0.0297723	ST8SIA1
224790_at	-1.16455	7.7365	-7.08064	6.94306e-05	0.00271455	ASAP1
223475_at	-1.6895	3.88104	-7.07778	6.96417e-05	0.00271455	CRISPLD1
238002_at	1.01033	7.82751	7.07757	6.96572e-05	0.00271455	GOLIM4
226939_at	-1.01107	8.38528	-4.24365	0.00234675	0.0296324	CPEB2
206440_at	1.52647	4.52917	4.24489	0.00234258	0.0295866	LIN7A
221553_at	1.02738	8.3866	7.06979	7.02356e-05	0.00273514	MAGT1
229532_at	-1.18172	5.69979	-7.06576	7.05373e-05	0.00274298	ZNF502
231234_at	2.23492	5.26216	4.25267	0.00231651	0.0293523	CTSC
217437_s_at	1.03841	9.3099	7.06405	7.06656e-05	0.00274601	TACC1
242438_at	-1.55914	8.03052	-4.25465	0.00230993	0.0292964	ASXL1
214539_at	2.78832	5.01647	7.06242	7.07882e-05	0.00274882	SERPINB10
200951_s_at	1.17442	7.99522	4.25481	0.0023094	0.0292964	CCND2
218306_s_at	-1.22351	9.48465	-4.25658	0.00230352	0.0292759	HERC1
235529_x_at	1.36572	7.84316	7.05681	7.12118e-05	0.00276331	SAMHD1
227125_at	1.1223	7.86806	4.26161	0.00228693	0.0290922	IFNAR2
202770_s_at	-1.61139	9.44157	-4.2645	0.00227748	0.029016	CCNG2
222672_at	-1.17673	7.37018	-7.04772	7.19046e-05	0.00278274	LYRM4
202820_at	-1.23688	8.60936	-4.26829	0.00226512	0.0289358	AHR
227027_at	1.41637	8.03422	4.26847	0.00226454	0.0289358	GFPT1
215992_s_at	2.51275	5.47703	7.04009	7.24912e-05	0.00280026	RAPGEF2
228088_at	-1.53522	6.25147	-7.03555	7.28432e-05	0.00280868	SESTD1
202604_x_at	1.06215	6.56939	7.03287	7.30519e-05	0.00281276	ADAM10
216288_at	-2.04962	4.43501	-7.02342	7.3792e-05	0.00283726	CYSLTR1
218681_s_at	1.41202	8.48736	4.28591	0.00220862	0.0284333	SDF2L1
225739_at	-1.01702	7.1055	-4.2864	0.00220704	0.0284264	RAB11FIP4
227452_at	1.34235	4.91795	7.01721	7.42835e-05	0.00285014	LINC00511
223178_s_at	1.10615	9.20157	7.01437	7.45091e-05	0.00285679	NT5DC1
211275_s_at	1.58205	8.97195	7.01231	7.46734e-05	0.00286108	GYG1
216997_x_at	-1.31506	5.28075	-4.29255	0.00218771	0.0282707	TLE4
210278_s_at	1.05662	6.08441	4.29277	0.00218703	0.0282707	AP4S1
219326_s_at	1.08242	7.94197	4.29538	0.00217887	0.0282164	B3GNT2
212185_x_at	1.62842	8.8266	4.29987	0.00216492	0.0280781	MT2A
1553655_at	-1.31863	3.96306	-4.30205	0.00215815	0.0280344	CDC20B
1562403_a_at	1.61944	5.72363	4.30222	0.00215763	0.0280343	SLC8A3
204798_at	-1.15339	7.83004	-4.30405	0.00215201	0.0279746	MYB
226460_at	3.30359	5.2788	6.99546	7.60321e-05	0.00289489	FNIP2
219459_at	1.05409	7.42917	4.31438	0.00212046	0.0276697	POLR3B
213475_s_at	-1.14323	8.35636	-4.3166	0.00211374	0.0276084	ITGAL
210564_x_at	-1.29685	9.39775	-4.31703	0.00211247	0.0276039	CFLAR
201468_s_at	1.26994	6.66894	6.97895	7.73898e-05	0.00293935	NQO1
226545_at	2.37663	5.38593	6.97645	7.75975e-05	0.00294016	CD109
227828_s_at	-2.14627	5.14097	-4.32232	0.00209656	0.0275022	FAM176A
203146_s_at	-1.92172	7.05662	-6.96552	7.85132e-05	0.00296868	GABBR1
1555105_a_at	1.06247	6.02241	6.96384	7.86549e-05	0.00296993	MIER1
205780_at	1.79899	6.87707	6.9597	7.90062e-05	0.00297344	BIK
226342_at	1.21914	5.92783	4.33239	0.00206664	0.0272583	SPTBN1
235735_at	-1.83636	5.23687	-6.9589	7.90741e-05	0.00297344	TNFSF8
1557321_a_at	-1.29073	4.46008	-4.3329	0.00206515	0.0272583	CAPN14
227533_at	-1.85882	8.85647	-4.3356	0.00205721	0.0271751	RALGPS2
234306_s_at	1.26257	6.4557	4.33916	0.00204682	0.0270968	SLAMF7
227525_at	1.06516	9.68444	6.94967	7.98629e-05	0.00299897	GLCCI1
217329_x_at	1.07717	9.12665	4.34022	0.00204373	0.0270625	COX7BP1
241118_at	1.93609	4.30715	4.3425	0.00203709	0.0270203	LINC00462
225157_at	-2.13731	7.61078	-6.94455	8.03045e-05	0.00301175	MLXIP
201627_s_at	1.00253	9.62605	4.34533	0.0020289	0.026953	INSIG1
219368_at	1.72248	4.90479	4.34562	0.00202806	0.0269529	NAP1L2
238327_at	1.70914	6.4927	6.93834	8.08431e-05	0.00302954	ODF3B
1552389_at	2.10054	4.09006	6.93759	8.09084e-05	0.00302991	C8orf47
205593_s_at	-1.85126	6.36208	-6.9352	8.11172e-05	0.00303565	PDE9A
206486_at	1.38721	5.08183	4.35131	0.00201171	0.0267942	LAG3
212561_at	-1.09378	9.43533	-6.93056	8.15242e-05	0.00304671	DENND5A
210788_s_at	1.04298	9.64909	4.35703	0.00199539	0.0266743	DHRS7
201466_s_at	-2.77315	8.43725	-4.35754	0.00199395	0.0266723	JUN
235914_at	1.07049	6.04986	6.92281	8.22088e-05	0.00306183	SYNPO
229415_at	1.39812	6.46957	4.3605	0.00198558	0.0265952	CYCS
222216_s_at	1.06498	8.84037	6.92156	8.23194e-05	0.00306386	MRPL17
211338_at	1.81722	4.11844	4.36363	0.00197674	0.0264981	IFNA2
208923_at	1.00381	8.40117	6.91756	8.26757e-05	0.00307294	CYFIP1
228810_at	1.27585	5.84644	6.9165	8.27704e-05	0.003074	CCNYL1
1559591_s_at	-1.45338	7.96428	-4.36527	0.00197216	0.0264544	CHDH
204672_s_at	-1.11966	5.07391	-6.91508	8.28969e-05	0.00307489	ANKRD6
228092_at	1.37258	7.06688	6.91081	8.32802e-05	0.00308498	CREM
212234_at	-1.01251	8.46088	-6.90835	8.35027e-05	0.00308752	ASXL1
220118_at	1.32591	6.53962	6.90816	8.35197e-05	0.00308752	ZBTB32
225579_at	-1.02703	8.20519	-4.37266	0.00195157	0.0262556	PQLC3
230988_at	-1.34675	5.07463	-4.37558	0.00194348	0.0261985	ADD2
204529_s_at	1.53594	6.98602	4.37775	0.0019375	0.0261497	TOX
239852_at	1.19862	5.0394	6.89924	8.43291e-05	0.00310883	MMAA
235675_at	1.35327	5.43792	4.37923	0.00193344	0.0261015	DHFRL1
226763_at	-1.60824	8.13541	-6.89704	8.45295e-05	0.00311222	SESTD1
209681_at	1.49594	7.33186	6.89337	8.48661e-05	0.00312041	SLC19A2
220346_at	1.03803	4.86065	6.88969	8.52055e-05	0.00312876	MTHFD2L
203263_s_at	1.11596	6.39702	6.88966	8.52076e-05	0.00312876	ARHGEF9
209682_at	1.34953	8.56203	4.38833	0.00190866	0.0258966	CBLB
225237_s_at	1.24966	7.65469	6.88591	8.55547e-05	0.00313729	MSI2
244640_at	-1.28716	6.43186	-6.88072	8.60373e-05	0.003149	ZNF850
201590_x_at	1.02955	9.97736	4.39248	0.00189745	0.0257939	ANXA2
204994_at	2.52364	8.23455	6.88057	8.6051e-05	0.003149	MX2
229313_at	1.70272	4.8191	4.39496	0.00189081	0.025742	ANO5
205932_s_at	2.33021	5.43014	6.87734	8.6353e-05	0.00315436	MSX1
227499_at	1.57095	4.7804	4.39696	0.00188544	0.025701	FZD3
1552790_a_at	1.49457	8.14005	6.87057	8.69899e-05	0.00317232	SEC62
234297_at	-1.20564	6.61462	-4.40302	0.00186932	0.0255449	SDHAP3
235122_at	-1.03867	7.06621	-4.40346	0.00186818	0.0255357	HIVEP3
205466_s_at	-2.31364	7.44338	-6.86334	8.76745e-05	0.00318882	HS3ST1
235638_at	1.55029	4.29478	4.41038	0.00184996	0.0253755	RASSF6
230748_at	1.62359	7.23626	6.85692	8.82884e-05	0.00320742	SLC16A6
202769_at	-1.66302	10.6657	-4.41253	0.00184435	0.0253223	CCNG2
218486_at	-2.02372	7.2445	-4.41285	0.00184352	0.0253223	KLF11
218194_at	-1.42584	8.58302	-6.8527	8.86944e-05	0.00321576	REXO2
210663_s_at	-1.03312	8.46537	-6.85064	8.88932e-05	0.00321681	KYNU
208078_s_at	-1.21529	8.55715	-6.84148	8.97832e-05	0.00324345	SIK1
223533_at	-1.46708	7.47656	-6.84117	8.98141e-05	0.00324345	LRRC8C
231496_at	1.25101	3.73233	4.42391	0.00181493	0.0250901	FCAMR
225646_at	3.0641	8.36605	6.83637	9.02846e-05	0.00325533	CTSC
209685_s_at	1.13669	10.8367	6.83599	9.03217e-05	0.00325533	PRKCB
211582_x_at	-1.65347	7.33682	-6.83479	9.04399e-05	0.00325745	LST1
226099_at	1.3477	9.87839	4.43198	0.00179435	0.0249171	ELL2
218807_at	-1.20769	6.75883	-4.4337	0.00179002	0.0248841	VAV3
200984_s_at	-1.59913	9.72641	-6.82382	9.15271e-05	0.00328734	CD59
219045_at	-1.56557	9.10244	-6.82145	9.17645e-05	0.00328734	RHOF
208018_s_at	-1.73823	6.64398	-6.82117	9.17928e-05	0.00328734	HCK
200965_s_at	-1.304	9.12826	-6.82073	9.18368e-05	0.00328734	ABLIM1
205585_at	1.0639	6.36771	6.8196	9.19498e-05	0.00328734	ETV6
213913_s_at	2.98829	4.62873	6.81878	9.20322e-05	0.00328734	TBC1D30
204731_at	2.17829	4.82518	4.44148	0.00177046	0.0246876	TGFBR3
215209_at	1.28625	4.65537	6.81304	9.26105e-05	0.00330299	SEC24D
203827_at	1.56023	7.16456	6.81184	9.27318e-05	0.00330516	WIPI1
212677_s_at	-1.4634	7.50713	-6.80889	9.30308e-05	0.00331365	CEP68
213262_at	1.07914	8.44022	4.45037	0.00174844	0.0244503	SACS
209120_at	3.10813	4.66861	6.80486	9.34418e-05	0.00332419	NR2F2
218897_at	1.02815	6.15195	4.45162	0.00174535	0.0244434	TMEM177
202722_s_at	1.53255	8.6205	6.80113	9.38229e-05	0.00332886	GFPT1
218974_at	-1.04169	6.52968	-4.45585	0.00173499	0.0243357	SOBP
203408_s_at	-2.1732	7.63768	-6.79725	9.42216e-05	0.00333772	SATB1
219383_at	-2.99409	5.55386	-6.7971	9.42378e-05	0.00333772	PRR5L
226603_at	1.63924	8.16144	6.79692	9.42559e-05	0.00333772	SAMD9L
225798_at	-1.63243	6.89742	-6.79056	9.49143e-05	0.00335019	JAZF1
219334_s_at	1.03072	4.71971	4.46378	0.00171574	0.0241214	NABP1
236350_at	1.16166	5.57049	4.46406	0.00171505	0.0241179	ARL5A
214239_x_at	1.522	5.93177	6.78806	9.51742e-05	0.00335503	PCGF2
201010_s_at	-1.87623	10.6128	-4.46591	0.00171059	0.0240737	TXNIP
209541_at	3.34317	5.07748	6.78335	9.56664e-05	0.00336962	IGF1
217868_s_at	-1.1902	10.5891	-6.78281	9.5723e-05	0.00336962	METTL9
1568592_at	1.09279	8.03354	4.47104	0.00169831	0.0239576	TRIM69
203810_at	1.03644	6.63733	4.47467	0.00168967	0.0238901	DNAJB4
228788_at	-1.9762	5.5883	-6.77331	9.67243e-05	0.00339435	YPEL1
244056_at	-1.43001	4.36984	-4.47829	0.00168109	0.0237872	SFTA2
210506_at	-1.75655	5.47613	-4.48036	0.00167621	0.0237407	FUT7
228442_at	-1.3237	8.38203	-6.76599	9.75039e-05	0.00341733	NFATC2
210427_x_at	1.02348	10.0104	4.48356	0.00166871	0.0236897	ANXA2
218927_s_at	1.17995	7.25225	4.4836	0.00166861	0.0236897	CHST12
222385_x_at	1.31032	6.55848	4.48427	0.00166703	0.0236897	SEC61A1
204285_s_at	1.07602	10.7663	4.48745	0.00165961	0.0236184	PMAIP1
202983_at	1.31831	8.78923	6.75638	9.85377e-05	0.00344252	HLTF
227900_at	1.95508	6.5987	6.75503	9.86843e-05	0.00344544	CBLB
218705_s_at	-1.34602	6.43294	-4.49094	0.0016515	0.0235279	SNX24
241833_at	1.0764	3.70985	4.49334	0.00164596	0.0234748	PEX5L
1569675_at	1.35243	4.05256	4.49659	0.00163847	0.023404	POU2AF1
218986_s_at	1.19496	8.15959	6.74699	9.95601e-05	0.00346719	DDX60
223358_s_at	-1.11558	10.7784	-6.74698	9.95609e-05	0.00346719	PDE7A
238482_at	-1.74711	5.64911	-6.7434	9.99539e-05	0.00347645	KLF7
218400_at	1.00294	7.54635	4.50168	0.00162683	0.0233028	OAS3
208195_at	-1.98178	6.09345	-4.50248	0.00162501	0.023289	TTN
204912_at	-2.17259	9.8484	-6.73843	0.000100502	0.00348885	IL10RA
239252_at	1.24581	5.83638	4.50858	0.00161118	0.0231758	COX7B
219858_s_at	1.12521	5.44939	4.51001	0.00160796	0.0231489	MFSD6
1554397_s_at	1.04112	5.82624	4.51007	0.00160781	0.0231489	UEVLD
243386_at	-1.38397	6.47302	-6.72969	0.000101473	0.00351809	CASZ1
213058_at	-1.81092	5.95727	-4.51063	0.00160655	0.0231489	TTC28
225915_at	1.03407	6.36143	6.72806	0.000101655	0.00352219	CAB39L
231956_at	1.48916	5.23525	4.52379	0.00157726	0.0228431	RNF213
1552807_a_at	-1.37147	7.64828	-4.52398	0.00157684	0.0228431	SIGLEC10
224232_s_at	1.06945	8.07194	4.52428	0.00157617	0.0228431	PRELID1
224229_s_at	-1.06337	5.17297	-4.52466	0.00157533	0.0228405	AKT3
211685_s_at	2.13506	6.06345	6.70926	0.000103785	0.00359027	NCALD
219681_s_at	-1.43865	9.21166	-4.52961	0.00156449	0.0227254	RAB11FIP1
202888_s_at	-1.63817	4.61803	-6.70384	0.000104408	0.00360841	ANPEP
1555785_a_at	1.01229	5.10693	4.53128	0.00156083	0.0226885	XRN1
233543_s_at	-1.16207	7.02361	-4.53307	0.00155694	0.0226398	FAM175A
238045_at	-1.40172	5.03312	-6.70013	0.000104836	0.00362091	TMEM65
243231_at	-1.72835	5.1505	-6.69855	0.000105019	0.00362495	SLC38A11
206858_s_at	-1.19292	4.6829	-4.53709	0.00154823	0.0225551	HOXC6
207202_s_at	1.33569	4.43825	4.54741	0.00152608	0.0223309	NR1I2
203367_at	1.35218	6.76612	4.55004	0.00152049	0.0222817	DUSP14
223825_at	1.64465	4.91376	6.67866	0.000107356	0.00369861	KIAA1432
224559_at	1.90611	8.12649	4.55268	0.00151491	0.0222178	MALAT1
225188_at	-1.90006	4.09979	-6.67543	0.00010774	0.00370717	RAPH1
209020_at	-1.05748	9.15273	-4.55674	0.00150637	0.02214	C20orf111
212974_at	-1.34239	6.33514	-6.66962	0.000108436	0.00372409	DENND3
235468_at	-1.33096	4.32931	-6.66765	0.000108674	0.00372739	RBFOX3
1554464_a_at	-1.70303	7.07033	-6.66712	0.000108737	0.00372739	CRTAP
213233_s_at	1.2241	8.51962	4.56124	0.00149696	0.0220431	KLHL9
1553369_at	-1.22489	7.48533	-6.66555	0.000108926	0.00372951	FAM129C
1556283_s_at	1.94629	6.45605	6.66343	0.000109183	0.00373099	FGFR1OP2
1554345_a_at	1.41294	6.08953	4.56363	0.00149198	0.0219877	GIN1
1552733_at	-1.45766	5.72293	-6.65257	0.000110507	0.00376446	KLHDC1
208029_s_at	2.16223	7.08324	4.57341	0.00147182	0.0217844	LAPTM4B
217728_at	-1.13448	9.35587	-4.57452	0.00146955	0.0217745	S100A6
202430_s_at	2.14474	7.61778	6.64905	0.000110939	0.0037727	PLSCR1
226456_at	-1.68648	8.65199	-6.64655	0.000111248	0.00377796	RMI2
227522_at	1.38866	6.34625	6.63888	0.0001122	0.00380084	CMBL
202007_at	1.37515	5.95984	4.58367	0.00145098	0.0215752	NID1
204584_at	-1.52213	5.25392	-4.5867	0.00144489	0.0215434	L1CAM
225647_s_at	3.18875	8.17119	6.63394	0.000112819	0.00381706	CTSC
201924_at	1.15133	10.1856	6.63181	0.000113086	0.00382341	AFF1
206533_at	1.5018	5.08498	6.62867	0.000113482	0.00382871	CHRNA5
200885_at	1.48295	7.46442	6.62854	0.000113499	0.00382871	RHOC
203971_at	1.24327	6.8292	6.62842	0.000113513	0.00382871	SLC31A1
227196_at	1.60776	6.0763	6.62371	0.000114111	0.00384411	RHPN2
209829_at	-1.06326	9.36935	-4.59523	0.00142788	0.0213537	FAM65B
204068_at	1.27231	7.22305	6.62241	0.000114276	0.00384496	STK3
45749_at	-1.06282	9.48658	-6.62172	0.000114364	0.00384553	FAM65A
201170_s_at	-1.75014	10.6917	-4.59694	0.0014245	0.021322	BHLHE40
1560853_x_at	-1.56252	6.09097	-4.59705	0.00142427	0.021322	ZNF826P
203394_s_at	1.5704	7.27755	4.59913	0.00142016	0.0212845	HES1
221524_s_at	1.81272	9.05429	6.61844	0.000114783	0.00385109	RRAGD
225704_at	-1.11716	8.16418	-6.61822	0.000114811	0.00385109	FBRSL1
203799_at	1.02498	6.77659	6.61723	0.000114938	0.00385299	CD302
213329_at	-1.34372	6.42151	-6.61604	0.00011509	0.00385317	SRGAP2
214574_x_at	-1.49351	7.44241	-6.61566	0.000115138	0.00385317	LST1
204591_at	2.51555	5.44061	4.60282	0.00141292	0.0212112	CHL1
211644_x_at	1.66156	10.3301	4.60382	0.00141098	0.0211879	IGKV3-20
228847_at	-1.35682	6.96485	-6.61194	0.000115618	0.00386394	EXOC3
1554770_x_at	1.05317	5.26421	4.60631	0.00140611	0.0211373	ZNF785
211849_s_at	1.26159	4.9353	4.60704	0.00140469	0.0211354	RNGTT
34408_at	-1.11804	6.78281	-4.61013	0.00139867	0.0210784	RTN2
232383_at	-1.90601	4.53984	-4.61067	0.00139764	0.0210784	TFEC
209457_at	2.48561	8.55027	6.60381	0.000116671	0.00388389	DUSP5
226283_at	-1.22044	8.44409	-6.60282	0.0001168	0.00388445	POC1B
201920_at	-1.08971	9.81241	-6.60191	0.000116918	0.00388502	SLC20A1
225071_at	1.09356	8.70121	6.60106	0.00011703	0.00388502	NUS1
211828_s_at	1.73087	6.5893	4.61542	0.00138847	0.0209836	TNIK
227935_s_at	-1.05251	9.1647	-6.59545	0.000117765	0.00390069	PCGF5
202519_at	-1.84431	7.63676	-6.59528	0.000117788	0.00390069	MLXIP
226000_at	1.64365	6.04431	4.62061	0.00137854	0.0209133	CTTNBP2NL
200983_x_at	-1.34201	9.55265	-4.62182	0.00137623	0.0208957	CD59
202070_s_at	1.11281	8.36508	6.58542	0.000119093	0.003932	IDH3A
1555759_a_at	1.10258	7.55518	4.62763	0.00136521	0.0207745	CCL5
210191_s_at	1.0842	7.1542	6.58318	0.000119391	0.00393711	PHTF1
226651_at	1.66159	6.84414	6.57944	0.000119891	0.00395121	HOMER1
231656_x_at	-1.44695	5.8952	-6.57587	0.000120373	0.00395991	OSBPL10
202655_at	1.16423	9.89172	4.63777	0.00134621	0.0205254	MANF
213714_at	1.66242	4.62769	4.63918	0.00134359	0.0204968	CACNB2
211478_s_at	1.33563	4.17498	4.64101	0.0013402	0.0204566	DPP4
210479_s_at	2.31496	6.00879	6.56384	0.000122005	0.00400636	RORA
206134_at	-3.96618	6.24201	-6.56248	0.000122191	0.00401008	ADAMDEC1
225864_at	-2.28094	5.85096	-4.64512	0.00133262	0.020375	FAM84B
221122_at	1.44207	5.48757	6.56117	0.000122371	0.00401358	HRASLS2
209644_x_at	1.00899	6.59483	4.64986	0.00132394	0.0202649	CDKN2A
1552263_at	-1.06342	8.39166	-6.55365	0.000123407	0.00403787	MAPK1
230355_at	-1.12511	6.2645	-4.65242	0.00131926	0.020216	SEPT7P2
212813_at	-1.04302	6.83532	-4.65279	0.00131858	0.0202113	JAM3
230876_at	-1.37283	4.00536	-6.55177	0.000123668	0.004044	ZNF883
219734_at	1.22176	8.69829	4.6545	0.00131548	0.0201863	SIDT1
207861_at	-1.1697	11.7976	-4.65709	0.0013108	0.0201485	CCL22
205768_s_at	-1.28544	4.4713	-4.65725	0.00131051	0.0201485	SLC27A2
230123_at	-1.05169	6.45984	-6.54687	0.00012435	0.00406144	NECAP2
201516_at	1.11332	8.96526	4.65907	0.00130722	0.0201361	SRM
212675_s_at	-1.57775	8.92955	-6.54074	0.000125209	0.00408068	CEP68
238443_at	1.05978	5.17106	4.6631	0.00129999	0.0200555	TFAM
225924_at	2.63213	6.09664	6.54001	0.000125313	0.00408068	FNIP2
210176_at	2.24922	7.26284	6.53337	0.000126251	0.00410879	TLR1
218546_at	-2.29545	6.84119	-4.66899	0.00128949	0.0199488	C1orf115
1556064_at	1.43135	5.38338	4.66985	0.00128796	0.0199375	PPARA
235299_at	1.06168	6.21763	4.67603	0.00127705	0.0197967	SLC41A2
225648_at	-1.00718	7.46902	-4.67616	0.00127682	0.0197967	STK35
228532_at	-1.32876	8.00956	-6.52402	0.000127587	0.00413259	C1orf162
238477_at	1.09883	7.06385	4.67863	0.0012725	0.0197614	KIF1C
235458_at	1.09146	5.61242	4.67873	0.00127232	0.0197614	HAVCR2
209191_at	1.95288	8.7076	6.51723	0.000128565	0.00414991	TUBB6
222344_at	1.16674	4.61692	4.68676	0.00125835	0.0196292	NREP
218805_at	2.0026	6.01833	6.51017	0.000129593	0.00417343	GIMAP5
210613_s_at	-2.07487	6.78248	-6.50911	0.000129747	0.00417534	SYNGR1
219522_at	1.56909	5.77334	4.69399	0.00124592	0.01953	FJX1
202236_s_at	1.09389	8.29108	4.69468	0.00124473	0.019517	SLC16A1
208636_at	1.09237	6.49466	6.5007	0.000130983	0.00421018	ACTN1
203029_s_at	-2.20447	6.57527	-6.50002	0.000131084	0.00421093	PTPRN2
239294_at	-1.47402	8.04188	-4.70243	0.00123156	0.0193853	PIK3CG
217457_s_at	-1.16618	8.21605	-6.49164	0.00013233	0.00423756	RAP1GDS1
1553425_at	-1.74471	4.78786	-6.49133	0.000132378	0.00423756	WDR65
201487_at	2.32024	9.03817	6.48934	0.000132676	0.00424461	CTSC
223062_s_at	1.66201	8.98756	4.70499	0.00122725	0.0193539	PSAT1
226726_at	-1.9112	6.10491	-6.48817	0.00013285	0.00424628	MBOAT2
230448_at	1.10791	6.16294	4.70854	0.00122129	0.0192822	SLC38A10
233575_s_at	-1.20797	4.79659	-4.7112	0.00121685	0.0192565	TLE4
205159_at	-1.04991	9.06901	-6.47657	0.000134605	0.00428876	CSF2RB
201060_x_at	1.10205	7.27843	6.47268	0.000135198	0.00430266	STOM
222941_at	-1.76744	5.87733	-6.47038	0.00013555	0.00430884	USP46
226625_at	2.03638	5.45877	4.72603	0.00119239	0.0189737	TGFBR3
203518_at	-2.1583	8.20338	-6.45969	0.000137202	0.0043538	LYST
1557078_at	1.3778	4.7746	6.45968	0.000137203	0.0043538	SLFN5
228956_at	-1.79107	6.72686	-4.7313	0.00118381	0.0188702	UGT8
208767_s_at	2.06835	6.80225	4.73496	0.0011779	0.0187979	LAPTM4B
219313_at	-1.52052	6.17126	-4.73789	0.00117319	0.0187447	GRAMD1C
227458_at	2.332	7.39503	6.44845	0.000138963	0.00439433	CD274
224828_at	1.63923	6.70858	4.7391	0.00117125	0.0187212	CPEB4
206126_at	-2.06397	7.78861	-4.73922	0.00117106	0.0187212	CXCR5
213503_x_at	1.05925	9.96208	4.74193	0.00116674	0.0186689	ANXA2
223233_s_at	-1.23699	5.58389	-6.44336	0.000139767	0.00441466	CGN
229997_at	1.5149	5.01298	6.44212	0.000139964	0.00441832	VANGL1
230630_at	1.52095	5.90564	6.44078	0.000140178	0.00441998	AK4
228868_x_at	-1.20116	7.21608	-6.43684	0.000140806	0.00443467	CDT1
235025_at	1.42192	6.11107	4.75364	0.00114824	0.0184864	WDR89
205518_s_at	-1.84965	7.88819	-6.42974	0.000141948	0.00446035	CMAHP
211796_s_at	-1.22228	9.28015	-6.42699	0.000142392	0.00447174	TRBC2
233320_at	-1.40663	3.67271	-4.75695	0.00114306	0.0184193	TCAM1P
232265_at	-1.02835	5.8478	-4.76414	0.00113191	0.0182718	ATXN7L1
238732_at	2.78837	4.12888	6.41505	0.000144341	0.00451735	COL24A1
219602_s_at	3.4609	5.2327	4.76805	0.0011259	0.0182149	PIEZO2
238025_at	1.32686	7.04952	4.76913	0.00112424	0.0182019	MLKL
223874_at	1.10533	5.3413	6.41202	0.000144839	0.00453035	ACTR3C
1552257_a_at	1.03494	8.05622	6.41043	0.000145103	0.00453601	TTLL12
203037_s_at	-2.81606	9.92463	-6.40937	0.000145277	0.00453887	MTSS1
202973_x_at	2.13999	5.06305	4.77227	0.00111945	0.0181405	FAM13A
244323_at	1.05486	4.05674	6.40522	0.000145966	0.00455519	BHLHE22
211580_s_at	1.35933	4.66625	6.4026	0.000146403	0.00456493	PIK3R3
228031_at	-1.25784	9.07454	-6.40016	0.000146811	0.00456593	TTPAL
241990_at	1.11352	6.27125	6.39908	0.000146991	0.00456634	RHOV
212704_at	-1.17773	8.64306	-6.39781	0.000147205	0.00456653	ZCCHC11
243894_at	1.22714	4.99674	6.39757	0.000147245	0.00456653	SLC41A2
203603_s_at	-1.45429	6.3191	-6.39755	0.000147248	0.00456653	ZEB2
236165_at	1.22886	7.13992	4.78151	0.00110546	0.0179617	MSL3
202053_s_at	1.3952	7.97997	4.78184	0.00110496	0.0179589	ALDH3A2
230047_at	-1.58146	4.97002	-6.39633	0.000147453	0.0045687	ARHGAP42
235143_at	1.31627	7.03766	6.39499	0.000147679	0.00457212	SLC10A7
215501_s_at	1.48921	7.88529	4.78616	0.00109849	0.0178962	DUSP10
242196_at	-1.56443	4.49075	-6.39172	0.000148231	0.00458661	ARHGAP32
221605_s_at	-1.4967	4.90718	-4.79038	0.0010922	0.0178257	PIPOX
217043_s_at	1.00501	8.86949	6.38695	0.000149041	0.00460905	MFN1
217553_at	-1.23302	5.33323	-4.79262	0.00108888	0.017797	STEAP1B
221868_at	-1.15717	6.39749	-4.7939	0.001087	0.0177779	PAIP2B
207761_s_at	-2.09546	9.44558	-6.38262	0.00014978	0.0046293	METTL7A
220770_s_at	1.59017	4.73836	6.37977	0.000150269	0.00463882	C5orf54
207433_at	2.88616	5.01725	6.37088	0.000151804	0.00466298	IL10
226682_at	2.29371	7.15731	4.80826	0.001066	0.0175342	RORA
204201_s_at	1.8498	4.27606	4.81214	0.00106041	0.017483	PTPN13
229865_at	2.16849	5.52299	6.36079	0.000153569	0.00470386	FNDC3B
230496_at	-1.09345	3.56329	-6.35164	0.000155187	0.00474618	FAM123A
212549_at	-1.01355	9.11062	-6.35151	0.000155211	0.00474618	STAT5B
213060_s_at	2.93714	7.49193	6.34445	0.000156473	0.00477143	CHI3L2
218029_at	-1.10279	8.43482	-6.34312	0.000156711	0.00477492	FAM65A
227099_s_at	1.0747	4.84604	4.83043	0.00103446	0.017192	C11orf96
218764_at	2.36563	5.78553	4.83309	0.00103074	0.0171719	PRKCH
1558028_x_at	1.02762	6.30738	4.83379	0.00102978	0.0171708	LINC00657
227020_at	-1.68391	8.24385	-6.33049	0.000159001	0.00482965	YPEL2
204286_s_at	1.05201	10.5101	4.83837	0.00102342	0.0171002	PMAIP1
214369_s_at	-1.61774	7.24331	-4.83879	0.00102283	0.0170967	RASGRP2
201465_s_at	-1.89516	7.72781	-4.84523	0.00101397	0.0169745	JUN
202100_at	-1.36595	8.86494	-4.84527	0.00101392	0.0169745	RALB
225283_at	-1.98566	6.25114	-4.84653	0.00101219	0.0169655	ARRDC4
204347_at	1.96767	6.26408	4.84664	0.00101204	0.0169655	AK4
217755_at	1.09065	9.25611	4.84931	0.0010084	0.0169227	HN1
201464_x_at	-2.65118	10.45	-6.31702	0.000161483	0.00488605	JUN
242338_at	1.35345	5.24485	4.85072	0.00100648	0.0169112	TMEM64
213449_at	1.19961	6.67465	4.85377	0.00100234	0.0168677	POP1
227478_at	-2.19325	8.08687	-6.31201	0.000162419	0.00490269	SETBP1
231646_at	-1.46344	5.14729	-4.85525	0.00100035	0.0168653	DPCR1
238029_s_at	-1.57672	4.98107	-6.3084	0.000163094	0.00491574	SLC16A14
203903_s_at	1.14462	3.95598	6.30742	0.000163279	0.00491741	HEPH
225045_at	1.17924	7.57803	6.30433	0.000163862	0.00493073	CCDC88A
220016_at	-1.68712	5.70262	-6.30327	0.000164061	0.00493401	AHNAK
228450_at	-2.05941	6.01578	-4.86629	0.000985561	0.0166673	PLEKHA7
201540_at	-2.01424	7.87101	-4.87119	0.000979064	0.0165883	FHL1
235168_at	1.18578	5.60847	4.87558	0.000973296	0.0165315	PIGM
232035_at	2.25774	5.90907	6.28501	0.000167554	0.00501887	HIST1H4H
221239_s_at	-1.76253	6.43294	-4.87846	0.000969536	0.0164977	FCRL2
220302_at	-1.17358	5.09618	-4.8785	0.000969485	0.0164977	MAK
209508_x_at	-1.27865	8.19814	-6.28074	0.000168383	0.00502803	CFLAR
204929_s_at	-1.25319	7.69769	-6.28025	0.000168479	0.00502817	VAMP5
226164_x_at	-1.80547	7.01556	-4.88198	0.000964945	0.0164459	RIMKLB
203430_at	-1.50458	9.59938	-6.27828	0.000168863	0.00503535	HEBP2
228824_s_at	1.9152	4.86634	6.27807	0.000168904	0.00503535	PTGR1
202381_at	1.33934	8.06708	6.27544	0.000169418	0.00504791	ADAM9
209369_at	1.71885	4.05238	6.27298	0.000169901	0.0050568	ANXA3
202766_s_at	1.13794	5.88624	6.26782	0.000170917	0.00508263	FBN1
203060_s_at	1.98813	4.20114	6.26643	0.000171193	0.00508696	PAPSS2
212958_x_at	1.28048	8.5709	4.8956	0.000947431	0.016208	PAM
1552323_s_at	-1.03016	5.97335	-4.89585	0.000947114	0.0162077	FAM122C
203148_s_at	1.12445	8.24525	6.26265	0.000171943	0.00510092	TRIM14
206036_s_at	-1.32614	9.38431	-4.89736	0.000945203	0.01618	REL
223566_s_at	-1.15147	7.8634	-6.25696	0.000173081	0.00512631	BCOR
238067_at	1.63054	4.54974	4.90269	0.000938453	0.0160948	TBC1D8B
219771_at	1.11221	4.93845	4.90292	0.000938166	0.0160948	TBC1D8B
220311_at	1.54312	5.78953	6.25362	0.000173751	0.00513784	N6AMT1
221156_x_at	1.04536	6.1133	4.90708	0.000932945	0.0160289	CCPG1
225698_at	-1.22546	10.5896	-6.24965	0.000174553	0.00515319	EPB41L4A-AS1
211048_s_at	1.3995	9.24919	4.91086	0.000928223	0.0159744	PDIA4
208121_s_at	-2.58554	7.0707	-4.91125	0.000927732	0.015971	PTPRO
219814_at	1.53302	5.08223	4.9144	0.000923826	0.0159238	MBNL3
228562_at	-1.30303	8.55735	-6.23311	0.000177934	0.00523771	ZBTB10
232760_at	-2.5761	4.55838	-6.22745	0.000179109	0.00525929	TEX15
228293_at	1.4489	4.47672	6.22565	0.000179485	0.00526339	DEPDC7
209716_at	-1.06132	7.07752	-6.22539	0.000179538	0.00526339	CSF1
203372_s_at	1.04703	5.68228	6.2231	0.000180017	0.00527463	SOCS2
210059_s_at	-1.38538	7.07979	-4.93142	0.000902996	0.0156684	MAPK13
212975_at	-1.1299	8.68244	-6.22169	0.000180313	0.00528045	DENND3
204472_at	1.64784	5.47323	4.93344	0.000900564	0.0156362	GEM
210152_at	1.07451	4.88087	4.93559	0.000897969	0.015601	LILRB4
213912_at	2.24335	4.63377	4.93563	0.000897928	0.015601	TBC1D30
200935_at	1.14134	6.02582	6.21638	0.00018143	0.00530748	CALR
215767_at	2.60453	5.77257	6.21506	0.000181707	0.00531275	ZNF804A
240633_at	-1.4319	5.93375	-4.94149	0.000890912	0.0155129	DOK7
205194_at	1.03426	7.30285	4.94473	0.000887067	0.0154509	PSPH
217497_at	1.43085	7.37249	6.20596	0.000183643	0.00535634	TYMP
204168_at	1.05151	7.66767	6.20363	0.000184142	0.00536673	MGST2
1405_i_at	1.41882	6.92751	4.94878	0.000882278	0.0153871	CCL5
214277_at	1.22499	3.98992	4.95373	0.00087646	0.0153149	COX11
223463_at	1.24387	5.70082	6.19651	0.000185676	0.00539265	RAB23
213355_at	2.3408	4.37561	6.19649	0.000185681	0.00539265	ST3GAL6
208363_s_at	1.22641	5.24263	6.19365	0.000186296	0.00540645	INPP4A
205207_at	-2.29448	6.93772	-4.95928	0.000869987	0.0152506	IL6
203120_at	-1.46506	8.36718	-6.18877	0.000187361	0.00542296	TP53BP2
224928_at	-1.11129	7.83883	-6.18822	0.000187481	0.00542357	SETD7
209708_at	1.97209	6.00734	4.96291	0.000865794	0.0152112	MOXD1
230036_at	1.13352	6.71436	4.96509	0.000863276	0.0151865	SAMD9L
232155_at	1.96143	5.42987	6.18388	0.000188434	0.00544147	RNF213
203828_s_at	2.21711	6.01491	6.18213	0.000188818	0.00544783	IL32
200952_s_at	1.21445	6.04441	4.9674	0.000860624	0.0151545	CCND2
1563947_a_at	-1.19818	5.53975	-4.96991	0.000857743	0.0151093	ERC1
219753_at	-1.35611	8.95433	-4.97046	0.00085712	0.0151074	STAG3
213836_s_at	1.57071	7.37219	6.17762	0.000189817	0.00547087	WIPI1
208010_s_at	1.11173	6.44556	4.97201	0.000855348	0.0150859	PTPN22
229065_at	1.84956	4.44796	6.17605	0.000190166	0.00547514	SLC35F3
227645_at	-1.0287	8.57485	-6.17386	0.000190653	0.00548628	PIK3R5
207016_s_at	-2.14282	5.05822	-4.97439	0.000852635	0.0150623	ALDH1A2
224799_at	1.13308	6.86854	6.17111	0.000191267	0.00549528	NDFIP2
205268_s_at	-2.11258	5.40898	-6.16799	0.000191966	0.00551194	ADD2
221030_s_at	-1.44157	6.19951	-6.16762	0.000192048	0.00551194	ARHGAP24
209987_s_at	1.49281	4.66915	6.16354	0.000192967	0.00553539	ASCL1
238617_at	1.30393	5.08985	6.16258	0.000193184	0.00553873	KIF26B
220007_at	1.08775	7.85318	4.98608	0.00083947	0.0148971	METTL8
227803_at	2.15638	4.42126	4.98896	0.000836262	0.0148643	ENPP5
209550_at	-1.72915	5.59166	-4.98965	0.000835492	0.0148581	NDN
214620_x_at	1.25433	6.96742	4.99092	0.000834078	0.01484	PAM
220655_at	2.08428	4.09843	6.15399	0.000195137	0.00558299	TNIP3
235653_s_at	1.13238	5.51849	6.15329	0.000195297	0.00558466	THAP6
226264_at	1.02774	6.54232	4.99258	0.000832245	0.0148189	SUSD1
210942_s_at	2.39107	4.31658	6.14453	0.000197313	0.00562466	ST3GAL6
206524_at	1.10647	6.74493	6.14323	0.000197614	0.00562736	T
219298_at	-1.40526	7.26848	-5.00122	0.00082274	0.0146908	ECHDC3
207039_at	1.80712	4.99564	6.14184	0.000197937	0.00562974	CDKN2A
238852_at	1.17923	3.40571	6.1411	0.000198107	0.00562974	PRRX1
210299_s_at	-1.88371	5.62205	-5.00397	0.000819744	0.0146565	FHL1
218627_at	1.76271	7.64502	5.00755	0.000815852	0.0145964	DRAM1
202375_at	1.49236	8.02313	5.01159	0.000811485	0.0145373	SEC24D
214469_at	1.0097	5.34758	5.01166	0.000811418	0.0145373	HIST1H2AE
1552364_s_at	1.11363	6.20316	5.01455	0.000808309	0.0145092	MSI2
1554240_a_at	-1.21878	8.54363	-5.01522	0.000807588	0.0145092	ITGAL
204655_at	1.19257	7.28137	5.01665	0.000806056	0.0145049	CCL5
228551_at	1.16945	7.99777	5.01748	0.000805179	0.0144956	DENND5B
206759_at	-1.40579	6.89108	-5.02078	0.000801658	0.0144513	FCER2
225999_at	-1.56254	6.04367	-5.02123	0.000801179	0.0144474	RIMKLB
238733_at	1.02969	4.99538	5.02135	0.000801054	0.0144474	MDM2
225021_at	-1.85681	6.19384	-6.11637	0.000203946	0.00575078	ZNF532
211862_x_at	-1.2744	8.13163	-6.1143	0.000204444	0.00576119	CFLAR
225166_at	1.18435	6.26327	6.11396	0.000204526	0.00576119	ARHGAP18
230185_at	1.01051	6.20586	6.11335	0.000204673	0.00576236	THAP9
204698_at	1.52588	10.0754	6.10983	0.000205522	0.00577878	ISG20
205413_at	-1.66149	4.01024	-6.10962	0.000205574	0.00577878	MPPED2
232154_at	-1.11967	6.31205	-5.0392	0.000782337	0.0142013	C19orf76
227374_at	1.01142	6.74977	5.04356	0.000777842	0.0141432	EARS2
210058_at	-1.71675	7.40253	-6.09531	0.000209068	0.00585593	MAPK13
207076_s_at	1.74437	6.18538	6.09468	0.000209223	0.00585728	ASS1
51158_at	2.16402	5.261	5.04449	0.000776889	0.0141401	FAM174B
229572_at	-1.33673	7.69519	-6.08504	0.000211615	0.00589851	ATP6V0A2
202524_s_at	-1.54327	7.66	-6.08484	0.000211667	0.00589851	SPOCK2
1554679_a_at	2.05638	5.68935	5.05359	0.000767598	0.0140363	LAPTM4B
202554_s_at	1.8674	5.92348	5.05634	0.00076481	0.0139993	GSTM3
225147_at	1.41355	7.46676	5.05726	0.000763882	0.0139917	CYTH3
220941_s_at	1.17352	7.20434	5.05758	0.00076356	0.0139906	C21orf91
206760_s_at	-1.46216	7.76125	-5.05999	0.000761142	0.0139564	FCER2
228776_at	2.03086	5.16126	6.07642	0.00021378	0.0059354	GJC1
235306_at	2.50018	4.87907	6.07574	0.000213952	0.0059354	GIMAP8
225070_at	1.08295	8.347	5.06905	0.000752099	0.0138361	NUS1
230211_at	1.0587	4.61877	5.06916	0.000751983	0.0138361	TRIP11
209693_at	1.05389	5.44922	6.06645	0.000216314	0.00598473	ASTN2
219654_at	1.17975	5.60193	5.06967	0.000751479	0.0138348	PTPLA
203640_at	1.10278	8.93763	6.06605	0.000216418	0.00598473	MBNL2
228561_at	1.16917	5.73383	5.07026	0.000750892	0.0138326	CDC37L1
213308_at	-1.20042	4.93809	-5.07412	0.000747086	0.013795	SHANK2
242462_at	-1.36849	5.0181	-5.07504	0.000746181	0.0137829	LINC00665
1555058_a_at	1.50493	6.97643	6.05875	0.000218295	0.00602501	LPGAT1
204638_at	-1.44364	8.42982	-6.05378	0.000219582	0.00605428	ACP5
230454_at	-1.09765	6.3252	-5.08149	0.000739864	0.0137033	ICA1L
204207_s_at	1.02069	7.9219	5.08459	0.000736856	0.0136832	RNGTT
211089_s_at	-1.00096	4.88722	-5.08468	0.00073676	0.0136832	NEK3
202721_s_at	1.20882	7.39752	6.04759	0.000221198	0.00608963	GFPT1
204011_at	2.36546	5.77073	6.04595	0.000221627	0.00609837	SPRY2
227476_at	1.21763	7.88915	6.02931	0.000226047	0.00617956	LPGAT1
223981_at	1.21333	6.05977	6.0284	0.000226292	0.00618317	NIN
226835_s_at	-1.04459	11.5401	-6.0218	0.000228073	0.00621319	ZNFX1-AS1
222557_at	-1.21935	7.79482	-5.11106	0.000711653	0.0133572	STMN3
221556_at	-1.90744	5.45747	-6.01955	0.000228682	0.00622357	CDC14B
220617_s_at	-1.51037	7.64992	-6.01922	0.000228773	0.00622357	ZNF532
229504_at	1.06101	4.69385	6.01872	0.000228909	0.00622357	RAB23
209301_at	-1.58742	7.37033	-6.01806	0.000229088	0.00622534	CA2
216191_s_at	-1.22562	4.1584	-5.11652	0.000706567	0.0132983	TRDC
235440_at	1.27487	6.54754	5.11822	0.000705	0.0132825	SPTY2D1
203675_at	1.84865	7.50942	6.0064	0.000232289	0.00629044	NUCB2
213194_at	1.26453	6.36707	5.13243	0.00069199	0.013087	ROBO1
208527_x_at	1.64237	7.6962	5.99551	0.00023532	0.00635365	HIST1H2BE
225173_at	1.40093	7.18971	5.99386	0.000235785	0.00635991	ARHGAP18
201131_s_at	3.78723	5.53869	5.99159	0.000236422	0.00636453	CDH1
213117_at	1.58182	5.74371	5.13859	0.000686427	0.0130088	KLHL9
212238_at	-1.03569	8.41723	-5.98813	0.0002374	0.00638709	ASXL1
227792_at	-1.09097	6.70644	-5.98196	0.000239154	0.00641889	ITPRIPL2
208476_s_at	1.65673	5.36512	5.98158	0.000239263	0.00641889	FRMD4A
204172_at	1.40772	8.60353	5.15098	0.000675392	0.012889	CPOX
202336_s_at	1.39823	8.6031	5.15237	0.000674174	0.0128703	PAM
205565_s_at	1.42726	7.56637	5.97302	0.000241719	0.00644998	FXN
221558_s_at	-1.37289	7.2832	-5.15649	0.000670551	0.01283	LEF1
226390_at	1.08036	8.8064	5.16052	0.00066703	0.0127875	STARD4
209544_at	-1.17406	6.53802	-5.16451	0.000663567	0.0127524	RIPK2
205685_at	-1.33865	8.33572	-5.96137	0.00024511	0.00652136	CD86
209276_s_at	1.63075	9.03503	5.17015	0.000658699	0.0126856	GLRX
209540_at	2.83448	5.04562	5.94761	0.000249181	0.00657527	IGF1
201426_s_at	-2.08656	11.2498	-5.17984	0.00065043	0.0125681	VIM
219032_x_at	-1.16321	9.44782	-5.94103	0.000251154	0.00661457	OPN3
208180_s_at	1.42686	5.22217	5.18755	0.000643933	0.0124759	HIST1H4H
203439_s_at	1.39603	5.52377	5.18776	0.000643756	0.0124759	STC2
1554474_a_at	2.01627	6.24227	5.18801	0.000643548	0.0124759	MOXD1
221092_at	1.4665	5.72705	5.9338	0.000253342	0.00666256	IKZF3
214512_s_at	1.02351	11.0925	5.19164	0.000640515	0.0124386	SUB1
203454_s_at	1.07137	9.32479	5.19627	0.000636666	0.0124154	ATOX1
201599_at	-1.45799	8.81949	-5.19645	0.000636521	0.0124154	OAT
1554667_s_at	1.21138	8.98868	5.92568	0.000255821	0.00669967	METTL8
232425_at	1.06657	4.81165	5.20087	0.000632876	0.0123713	SNX25
211316_x_at	-1.30161	9.25886	-5.92148	0.000257114	0.00672879	CFLAR
201215_at	2.98132	4.39433	5.92116	0.000257214	0.00672879	PLS3
219683_at	1.64746	5.50663	5.92036	0.000257462	0.00672947	FZD3
207386_at	2.35298	4.35791	5.91567	0.000258917	0.00673522	CYP7B1
1569969_a_at	1.25733	3.60527	5.20767	0.000627309	0.0123021	UNC13C
239250_at	-1.16047	6.2399	-5.91465	0.000259236	0.00673977	ZNF542
219901_at	1.58294	4.73091	5.21089	0.00062469	0.0122639	FGD6
220177_s_at	2.80939	4.68426	5.21344	0.000622625	0.0122277	TMPRSS3
228338_at	-1.17312	5.43543	-5.21483	0.000621502	0.0122101	C11orf93
208485_x_at	-1.31715	7.95692	-5.90498	0.000262269	0.00679278	CFLAR
212587_s_at	-1.17684	10.3036	-5.21837	0.000618649	0.0121715	PTPRC
228953_at	-1.5742	8.99016	-5.90201	0.000263206	0.00681382	WHAMM
206085_s_at	1.80137	5.82111	5.90032	0.000263743	0.00682449	CTH
212268_at	-2.34858	8.65744	-5.22545	0.000613001	0.012097	SERPINB1
208490_x_at	1.6879	7.63315	5.89517	0.000265385	0.00686049	HIST1H2BF
217127_at	1.62008	6.90295	5.23235	0.000607542	0.0120135	CTH
218358_at	1.04966	9.2524	5.88692	0.000268036	0.00691593	CRELD2
227929_at	2.40964	4.77462	5.87657	0.000271406	0.00697327	LIN7A
1569652_at	2.10618	4.72315	5.87506	0.000271899	0.00697939	MLLT3
225032_at	1.94417	7.65772	5.24668	0.000596373	0.0118786	FNDC3B
206060_s_at	1.01375	8.5721	5.24776	0.000595546	0.0118664	PTPN22
228964_at	3.32685	6.96058	5.24902	0.000594573	0.0118557	PRDM1
230383_x_at	1.15499	6.41667	5.86821	0.000274159	0.0070242	SLFN5
210534_s_at	1.27072	5.52235	5.25302	0.00059151	0.0118248	B9D1
228256_s_at	-1.73327	5.65508	-5.86187	0.000276267	0.00705518	EPB41L4A
1569788_at	-1.1559	3.67935	-5.86112	0.000276518	0.00705518	ST8SIA1
203302_at	-1.13252	9.86001	-5.85462	0.000278703	0.00709408	DCK
205140_at	1.30202	6.26751	5.853	0.000279249	0.00710468	FPGT
201714_at	1.0741	8.20199	5.26597	0.000581694	0.0117142	TUBG1
214775_at	-1.1881	5.28226	-5.85144	0.000279775	0.00711062	N4BP3
211991_s_at	-1.03597	11.8081	-5.84799	0.000280946	0.00713458	HLA-DPA1
236381_s_at	1.08244	7.47063	5.8459	0.00028166	0.00713943	WRAP73
202006_at	1.0572	8.9507	5.27238	0.000576901	0.0116391	PTPN12
235760_at	1.39111	5.82396	5.84231	0.000282887	0.00716721	NSD1
206183_s_at	-1.52028	5.7241	-5.84158	0.000283139	0.00717028	HERC3
211192_s_at	-1.69033	5.64094	-5.83862	0.000284157	0.00718274	CD84
203335_at	-1.26765	8.05075	-5.27928	0.000571791	0.0115659	PHYH
1556163_a_at	-1.07884	5.47877	-5.83811	0.000284331	0.00718383	IGSF3
235643_at	1.40044	5.47838	5.83739	0.000284581	0.0071856	SAMD9L
228071_at	2.12382	4.47345	5.83662	0.000284845	0.0071856	GIMAP7
223596_at	1.26473	6.4311	5.2828	0.000569204	0.0115179	SLC12A6
230536_at	-1.08376	6.05857	-5.2833	0.000568843	0.0115148	PBX4
214873_at	-1.04878	6.19628	-5.28336	0.000568799	0.0115148	LRP5L
203208_s_at	1.08096	7.05713	5.28479	0.000567753	0.0115013	MTFR1
1560396_at	-1.43601	7.97262	-5.83124	0.000286711	0.00721553	KLHL6
203178_at	2.36075	8.79271	5.82924	0.000287408	0.00722484	GATM
204678_s_at	1.00395	5.49775	5.28987	0.000564051	0.0114475	KCNK1
219014_at	2.29932	10.1553	5.82521	0.000288814	0.00725353	PLAC8
203695_s_at	2.04599	9.0094	5.2921	0.000562428	0.011423	DFNA5
207426_s_at	-1.31327	7.98044	-5.29288	0.000561865	0.0114158	TNFSF4
1569039_s_at	-1.16951	4.41861	-5.29365	0.000561307	0.0114087	ZNF677
1566257_at	1.31771	6.04866	5.29388	0.000561142	0.0114087	GPR180
217028_at	-1.67379	11.3638	-5.81691	0.000291743	0.00729024	CXCR4
213116_at	-1.04766	7.07189	-5.30021	0.00055659	0.0113297	NEK3
226039_at	-1.08768	5.86145	-5.81558	0.000292215	0.00729249	MGAT4A
1553055_a_at	1.23996	4.32999	5.81553	0.000292233	0.00729249	SLFN5
208206_s_at	-1.44232	7.50883	-5.30497	0.000553197	0.0112943	RASGRP2
208546_x_at	1.8866	7.2517	5.30909	0.000550278	0.0112557	HIST1H2BH
228043_at	1.04921	5.70938	5.30941	0.000550053	0.0112553	UTP15
239082_at	1.35402	6.49971	5.80492	0.000296029	0.00736368	FZD3
219765_at	-1.00699	7.41028	-5.31589	0.00054549	0.0111929	ZNF329
217542_at	1.55984	5.54197	5.31611	0.000545342	0.0111929	MDM2
210732_s_at	1.48305	6.46834	5.79871	0.000298272	0.00740599	LGALS8
226649_at	1.21577	5.31197	5.79181	0.00030079	0.00745498	PANK1
227629_at	1.4715	3.84999	5.324	0.000539844	0.0111046	PRLR
229053_at	-1.92081	5.9339	-5.32609	0.000538403	0.0110902	SYT17
219938_s_at	-1.39902	6.94856	-5.32759	0.000537369	0.0110745	PSTPIP2
210656_at	-1.09035	6.27423	-5.32881	0.000536527	0.0110655	EED
224685_at	1.49947	8.29544	5.32884	0.000536504	0.0110655	MLLT4
209360_s_at	-2.00805	8.10093	-5.78533	0.000303175	0.00748936	RUNX1
203767_s_at	2.05777	5.9617	5.33193	0.000534385	0.0110296	STS
229604_at	-1.70221	5.84373	-5.33275	0.000533825	0.0110264	CMAHP
202862_at	1.19832	6.82876	5.33515	0.000532185	0.011005	FAH
225189_s_at	-1.43414	4.16465	-5.77893	0.00030555	0.00751929	RAPH1
204533_at	2.33502	6.62187	5.77847	0.000305723	0.00751929	CXCL10
211919_s_at	-1.50385	10.1454	-5.33741	0.00053065	0.0109857	CXCR4
1563674_at	-2.2934	7.26205	-5.77713	0.000306223	0.0075282	FCRL2
222218_s_at	1.44728	5.82558	5.33898	0.000529578	0.010976	PILRA
1556021_at	1.46326	5.62063	5.34023	0.000528734	0.0109697	GPR180
209959_at	-2.29289	7.45768	-5.77305	0.000307754	0.00755579	NR4A3
219463_at	3.58835	6.11038	5.77303	0.000307759	0.00755579	LAMP5
213620_s_at	1.07187	8.98796	5.77078	0.000308607	0.00756642	ICAM2
207238_s_at	-1.1641	10.1635	-5.34757	0.000523791	0.0109015	PTPRC
223595_at	-1.97577	5.42062	-5.7664	0.000310261	0.00758995	TMEM133
205544_s_at	2.65083	8.55453	5.76507	0.000310766	0.00759549	CR2
204684_at	-2.25956	5.93575	-5.76274	0.000311654	0.00761379	NPTX1
223228_at	-1.05731	7.64632	-5.75214	0.000315721	0.00769849	LDOC1L
209615_s_at	1.43782	6.17568	5.75136	0.000316021	0.00769985	PAK1
227143_s_at	-1.16512	8.37786	-5.7507	0.000316279	0.0077007	BID
208499_s_at	1.26923	6.25899	5.74943	0.00031677	0.00770779	DNAJC3
224027_at	-1.69786	5.97848	-5.36703	0.000510929	0.0106908	CCL28
203397_s_at	-2.02358	6.81844	-5.3673	0.00051075	0.0106908	GALNT3
201005_at	2.46495	7.9566	5.7447	0.000318608	0.00773639	CD9
204040_at	1.39152	5.20697	5.37039	0.000508741	0.0106573	RNF144A
1556095_at	1.34298	3.45471	5.74125	0.00031996	0.00776122	UNC13C
237411_at	-1.6922	6.50073	-5.37565	0.00050534	0.0106023	ADAMTS6
223741_s_at	-1.05354	6.35459	-5.73389	0.000322859	0.00781077	TTYH2
213038_at	-1.06329	6.71048	-5.38108	0.000501849	0.0105492	RNF19B
225171_at	1.36991	7.76047	5.38131	0.000501706	0.0105492	ARHGAP18
216986_s_at	1.04443	5.8702	5.72958	0.000324571	0.0078383	IRF4
1556096_s_at	1.98203	4.16184	5.72875	0.000324898	0.0078393	UNC13C
200897_s_at	-2.40494	5.57313	-5.72823	0.000325106	0.00784082	PALLD
237591_at	-1.38431	6.63135	-5.38571	0.000498901	0.0105034	LINC00173
218966_at	-1.51871	6.69789	-5.72248	0.00032741	0.00787902	MYO5C
210571_s_at	-1.75286	6.29007	-5.39457	0.000493305	0.0104217	CMAHP
219691_at	1.06544	6.51627	5.7172	0.00032954	0.00791635	SAMD9
217591_at	-1.29005	7.35054	-5.39803	0.000491136	0.010392	SKIL
219387_at	1.54773	6.70775	5.71407	0.000330808	0.00794092	CCDC88A
226837_at	1.27191	4.45047	5.71396	0.000330854	0.00794092	SPRED1
200904_at	-1.63417	10.4868	-5.39971	0.000490087	0.0103778	HLA-E
228081_at	-1.63923	6.67875	-5.40225	0.000488506	0.0103591	CCNG2
232080_at	2.50089	5.59208	5.70936	0.000332731	0.00797547	HECW2
215058_at	1.22543	6.89243	5.40413	0.00048734	0.0103397	DENND5B
228094_at	-1.52401	6.87728	-5.70559	0.000334277	0.00799852	AMICA1
218706_s_at	2.17391	5.89369	5.70408	0.000334897	0.00800983	GRAMD3
1569481_s_at	-1.33997	6.29494	-5.40882	0.000484444	0.0102982	SNX22
226055_at	-1.10033	8.60966	-5.41221	0.000482363	0.0102659	ARRDC2
213469_at	1.41635	6.01513	5.41414	0.00048118	0.0102527	PGAP1
231929_at	1.78138	8.93458	5.69241	0.000339745	0.00809393	IKZF2
228461_at	1.89444	5.22994	5.68916	0.000341105	0.00812001	SH3RF3
227930_at	-1.25735	8.16718	-5.679	0.000345407	0.00817185	EIF2C4
227361_at	-2.13483	6.12356	-5.67681	0.000346342	0.0081793	HS3ST3B1
227877_at	-1.66466	7.38925	-5.67651	0.00034647	0.0081793	ANXA2R
225929_s_at	1.0858	8.80069	5.43464	0.000468832	0.0100602	RNF213
209822_s_at	1.40381	5.29912	5.43586	0.000468105	0.0100485	VLDLR
206693_at	1.72314	6.8667	5.67341	0.000347798	0.00820419	IL7
235353_at	-1.40613	7.29566	-5.67148	0.000348629	0.00820985	SEL1L3
203355_s_at	-2.34397	5.22477	-5.43943	0.000465992	0.0100298	PSD3
220158_at	3.32221	5.32252	5.6687	0.000349825	0.00822653	LGALS14
229344_x_at	-1.67462	7.70668	-5.44634	0.000461937	0.00995915	RIMKLB
243529_at	1.23118	6.5381	5.66437	0.000351702	0.00825293	MARS2
201554_x_at	1.62983	8.10417	5.44743	0.0004613	0.00995326	GYG1
204440_at	-1.07454	11.0014	-5.66184	0.000352805	0.0082687	CD83
208760_at	-1.04633	8.42593	-5.65671	0.000355048	0.00831005	UBE2I
235401_s_at	2.14294	8.2969	5.65581	0.000355445	0.00831222	FCRLA
229070_at	-1.70738	8.30935	-5.6541	0.000356196	0.00832621	ADTRP
221577_x_at	2.31726	5.31515	5.45721	0.00045563	0.0098609	GDF15
1554824_at	-1.30223	5.33065	-5.65186	0.000357187	0.00834343	ZNF585A
1552302_at	1.0278	5.89034	5.65108	0.000357531	0.00834672	TMEM106A
239135_at	-1.17175	6.13243	-5.46007	0.000453985	0.00983814	CPPED1
211317_s_at	-1.40948	8.4187	-5.65034	0.000357858	0.00835078	CFLAR
227337_at	2.25648	8.85881	5.64978	0.000358106	0.00835238	ANKRD37
212838_at	1.35446	7.71196	5.46272	0.000452468	0.00982084	DNMBP
211668_s_at	-1.0334	4.93483	-5.46453	0.000451432	0.00980224	PLAU
225129_at	-1.25908	6.44965	-5.46506	0.000451131	0.00980163	CPNE2
205084_at	1.06259	6.63296	5.64275	0.000361237	0.00839025	BCAP29
221523_s_at	2.00732	7.66422	5.4691	0.000448835	0.00977103	RRAGD
33304_at	1.29782	9.76591	5.63564	0.000364433	0.00844296	ISG20
229309_at	-2.12928	4.55285	-5.63106	0.000366508	0.00848744	ADRB1
226425_at	1.52616	7.2529	5.47934	0.000443077	0.00967462	CLIP4
206508_at	1.34902	8.71651	5.6292	0.000367356	0.00849732	CD70
1554306_at	-1.60332	6.97391	-5.62831	0.00036776	0.00849732	ITPKB
226140_s_at	-1.73003	9.37602	-5.48177	0.00044172	0.0096527	OTUD1
206357_at	1.07093	5.3424	5.62807	0.000367867	0.00849732	OPA3
236471_at	1.4979	4.95525	5.48806	0.000438231	0.00960332	NFE2L3
223735_at	1.04057	5.29534	5.61677	0.000373066	0.00858925	ARL6
237817_at	1.25393	5.26685	5.49367	0.000435149	0.00955493	SSR3
209201_x_at	-1.59275	10.2602	-5.61499	0.000373892	0.00860014	CXCR4
226422_at	1.03947	8.71645	5.61437	0.000374181	0.00860317	ERGIC2
238762_at	1.06461	6.89313	5.60541	0.000378371	0.00866309	MTHFD2L
215103_at	-1.36856	4.09862	-5.5084	0.000427161	0.00943149	CYP2C18
205807_s_at	-1.38247	5.83137	-5.59667	0.000382506	0.0087407	TUFT1
205945_at	1.26267	5.72159	5.51461	0.000423842	0.00937821	IL6R
200616_s_at	1.2214	9.35813	5.51872	0.000421658	0.00935259	MLEC
202411_at	1.33544	5.28097	5.52061	0.000420656	0.00934175	IFI27
202284_s_at	1.06617	9.71554	5.5275	0.00041704	0.0092765	CDKN1A
1555993_at	-1.63398	5.06012	-5.57957	0.000390744	0.00887943	CACNA1D
236294_at	-1.32705	6.52968	-5.5787	0.000391167	0.00888536	HUWE1
242702_at	1.32306	5.02726	5.57725	0.000391876	0.00889407	MMAA
224831_at	1.07043	8.95079	5.57415	0.000393397	0.00891748	CPEB4
230802_at	-1.9494	6.25384	-5.53608	0.000412573	0.00920979	ARHGAP24
204502_at	1.70553	6.11894	5.56965	0.000395611	0.0089618	SAMHD1
206210_s_at	-1.44157	6.5785	-5.54366	0.000408677	0.00915756	CETP
220892_s_at	1.20104	6.51713	5.54427	0.000408367	0.00915435	PSAT1
204044_at	1.15744	7.11627	5.56419	0.000398319	0.00898806	QPRT
215100_at	-1.08381	6.6285	-5.56292	0.000398949	0.00899486	ADTRP
235109_at	1.19496	6.01837	5.54657	0.000407193	0.00913177	ZBED3
225943_at	1.10771	6.65141	5.56072	0.000400047	0.00901218	NLN
208576_s_at	-1.28602	4.52958	-5.54942	0.000405739	0.00910871	HIST1H3B
202886_s_at	1.1014	6.67594	5.55798	0.00040142	0.00903939	PPP2R1B
242417_at	-1.60078	5.21253	-5.55611	0.000402361	0.00904652	PLEKHA7

## Sheet: Activation
affyid	logFC	AveExpr	t	P.Value	adj.P.Val	geneSymbol
204641_at	5.3044	7.45393	48.4074	7.27262e-12	2.63641e-07	NEK2
223700_at	6.00187	7.15977	46.8536	9.64394e-12	2.63641e-07	MND1
203755_at	4.75439	8.58771	43.0551	2.00329e-11	2.98421e-07	BUB1B
209464_at	4.76505	7.40293	42.6287	2.18324e-11	2.98421e-07	AURKB
218039_at	4.53663	9.87312	40.3849	3.4835e-11	3.71526e-07	NUSAP1
229354_at	5.13856	7.53949	37.4623	6.66409e-11	3.71526e-07	AHRR
218355_at	4.18862	7.20534	36.9092	7.57701e-11	3.71526e-07	KIF4A
235343_at	6.4476	7.46342	36.3706	8.60181e-11	3.71526e-07	VASH2
229097_at	3.98671	7.38525	36.2082	8.94057e-11	3.71526e-07	DIAPH3
205167_s_at	3.24978	6.10005	35.0622	1.17995e-10	3.71526e-07	CDC25C
222680_s_at	4.89724	7.1521	34.9605	1.20988e-10	3.71526e-07	DTL
201564_s_at	4.24599	7.41636	34.8968	1.22906e-10	3.71526e-07	FSCN1
203764_at	6.1621	7.63448	34.7846	1.26367e-10	3.71526e-07	DLGAP5
219990_at	5.31592	6.87509	34.7051	1.28888e-10	3.71526e-07	E2F8
204709_s_at	5.03924	6.72851	34.4389	1.37735e-10	3.71526e-07	KIF23
226980_at	5.11936	7.16257	34.377	1.39889e-10	3.71526e-07	DEPDC1B
203854_at	3.31331	4.86583	34.1317	1.48799e-10	3.71526e-07	CFI
222608_s_at	5.13196	6.71545	34.1132	1.49494e-10	3.71526e-07	ANLN
228273_at	5.46333	8.90368	33.922	1.56919e-10	3.73023e-07	PRR11
1554696_s_at	5.83207	8.32407	33.6948	1.66278e-10	3.78801e-07	TYMS
222457_s_at	4.57323	7.37452	33.4986	1.74862e-10	3.82423e-07	LIMA1
201292_at	5.63409	8.55031	33.0159	1.98168e-10	4.0051e-07	TOP2A
218542_at	5.76873	7.3878	32.8865	2.04986e-10	4.0051e-07	CEP55
206364_at	5.25362	7.17072	32.8842	2.05108e-10	4.0051e-07	KIF14
235486_at	3.47027	5.64239	32.681	2.16366e-10	4.07925e-07	KIAA1549L
202085_at	2.79477	7.76686	31.4868	2.98164e-10	4.79545e-07	TJP2
204825_at	5.26674	8.3651	31.4186	3.03786e-10	4.79545e-07	MELK
207900_at	7.61864	8.19576	31.2816	3.15434e-10	4.79545e-07	CCL17
232737_s_at	2.64244	4.00481	31.1974	3.22835e-10	4.79545e-07	ENPP3
223381_at	4.50503	7.94673	31.1113	3.30615e-10	4.79545e-07	NUF2
219978_s_at	3.81268	7.48133	31.0699	3.34427e-10	4.79545e-07	NUSAP1
209891_at	5.19799	6.71961	31.0107	3.39963e-10	4.79545e-07	SPC25
228033_at	4.17297	6.67526	30.992	3.41736e-10	4.79545e-07	E2F7
219148_at	5.79127	7.52762	30.9885	3.42062e-10	4.79545e-07	PBK
209709_s_at	4.91365	7.42173	30.6388	3.7717e-10	5.15544e-07	HMMR
205393_s_at	4.48104	6.8788	30.2857	4.16748e-10	5.31369e-07	CHEK1
203214_x_at	5.11746	7.89217	30.2236	4.24175e-10	5.31369e-07	CDK1
201291_s_at	5.36673	8.5492	30.0459	4.46252e-10	5.31369e-07	TOP2A
229610_at	3.40443	7.00473	30.0046	4.5157e-10	5.31369e-07	CKAP2L
220651_s_at	5.5249	7.16348	29.9456	4.59279e-10	5.31369e-07	MCM10
219588_s_at	2.90189	8.64106	29.8807	4.67941e-10	5.31369e-07	NCAPG2
1554408_a_at	3.67723	7.27464	29.8601	4.70717e-10	5.31369e-07	TK1
238075_at	3.00604	7.22576	29.8199	4.76216e-10	5.31369e-07	CHEK1
204962_s_at	5.09079	7.77311	29.4793	5.25674e-10	5.45968e-07	CENPA
203554_x_at	3.52803	10.056	29.4065	5.36988e-10	5.45968e-07	PTTG1
201842_s_at	3.55577	4.73747	29.3922	5.39228e-10	5.45968e-07	EFEMP1
218585_s_at	6.12318	7.91905	29.3123	5.52001e-10	5.48297e-07	DTL
226415_at	5.60996	6.19114	29.2537	5.61585e-10	5.48297e-07	VAT1L
218009_s_at	3.77484	8.78708	29.1235	5.83555e-10	5.50449e-07	PRC1
239977_at	-2.84272	5.55334	-29.0945	5.88581e-10	5.50449e-07	C12orf42
222039_at	4.2814	7.43916	29.0176	6.02123e-10	5.50449e-07	KIF18B
1552619_a_at	3.88665	6.11746	29.0068	6.0406e-10	5.50449e-07	ANLN
38158_at	2.94887	7.80954	28.8721	6.28732e-10	5.6354e-07	ESPL1
212949_at	4.25946	7.34627	28.7924	6.43846e-10	5.67779e-07	NCAPH
229552_at	-4.02636	5.76455	-28.6906	6.63757e-10	5.72405e-07	HRK
223790_at	2.48886	6.04258	28.589	6.84328e-10	5.72405e-07	KATNAL1
205394_at	4.57767	7.28992	28.5769	6.8682e-10	5.72405e-07	CHEK1
221912_s_at	2.94132	7.92227	28.4936	7.04275e-10	5.72405e-07	CCDC28B
217892_s_at	3.83431	8.00467	28.4852	7.06056e-10	5.72405e-07	LIMA1
204822_at	4.16626	7.47473	28.4579	7.11907e-10	5.72405e-07	TTK
219740_at	4.3313	6.80031	28.1994	7.69991e-10	6.10134e-07	VASH2
213599_at	4.14174	7.54952	28.1074	7.91927e-10	6.15825e-07	OIP5
236641_at	5.42724	6.92138	28.0755	7.99699e-10	6.15825e-07	KIF14
218663_at	5.32629	7.28944	27.9913	8.20608e-10	6.23149e-07	NCAPG
202954_at	4.87493	8.68016	27.903	8.43201e-10	6.31534e-07	UBE2C
203362_s_at	3.45688	9.65482	27.8181	8.65571e-10	6.39529e-07	MAD2L1
202705_at	5.34944	8.47313	27.717	8.93068e-10	6.51046e-07	CCNB2
226661_at	4.72264	7.45115	27.3385	1.00505e-09	7.23042e-07	CDCA2
228868_x_at	5.06892	7.21608	27.1635	1.06204e-09	7.38568e-07	CDT1
222962_s_at	4.76355	7.00057	27.115	1.07848e-09	7.38568e-07	MCM10
212021_s_at	3.49679	7.65484	27.1086	1.08067e-09	7.38568e-07	MKI67
210052_s_at	4.95396	7.52667	26.7261	1.2209e-09	8.24107e-07	TPX2
202338_at	3.50968	7.72525	26.5306	1.30037e-09	8.67042e-07	TK1
204162_at	3.51107	8.32525	26.3825	1.36436e-09	8.86028e-07	NDC80
218726_at	3.87528	7.40605	26.2649	1.41768e-09	8.86028e-07	HJURP
210559_s_at	5.83086	8.29525	26.2518	1.42377e-09	8.86028e-07	CDK1
212022_s_at	4.89165	7.74738	26.2486	1.42527e-09	8.86028e-07	MKI67
206975_at	4.28012	8.33197	26.196	1.45004e-09	8.86028e-07	LTA
210643_at	3.76807	6.71549	26.1787	1.45827e-09	8.86028e-07	TNFSF11
204817_at	2.65285	7.67648	26.1666	1.46405e-09	8.86028e-07	ESPL1
212458_at	4.30177	6.86487	26.1336	1.48002e-09	8.86028e-07	SPRED2
235956_at	-2.9605	4.93107	-26.0897	1.50149e-09	8.86028e-07	KIAA1377
228729_at	4.87865	7.33284	26.0584	1.51703e-09	8.86028e-07	CCNB1
203418_at	4.95807	7.28751	25.8171	1.64312e-09	9.35806e-07	CCNA2
205339_at	2.89464	7.71076	25.6178	1.75605e-09	9.79713e-07	STIL
210135_s_at	3.72678	4.54902	25.5103	1.82053e-09	1.00543e-06	SHOX2
207165_at	5.58458	8.23774	25.4579	1.85292e-09	1.01308e-06	HMMR
204067_at	2.29938	6.33839	25.3574	1.9169e-09	1.032e-06	SUOX
223307_at	4.09611	8.04643	25.3283	1.93585e-09	1.032e-06	CDCA3
209242_at	2.6703	4.52982	25.2783	1.96889e-09	1.032e-06	PEG3
221677_s_at	3.00418	8.01662	25.2779	1.96921e-09	1.032e-06	DONSON
206864_s_at	-3.55798	5.77967	-25.2589	1.98189e-09	1.032e-06	HRK
218755_at	5.20352	7.10029	24.8596	2.27204e-09	1.17192e-06	KIF20A
208999_at	3.26251	6.99352	24.8229	2.30103e-09	1.17578e-06	2013-09-08
208892_s_at	3.52524	6.6301	24.7835	2.33257e-09	1.18086e-06	DUSP6
213365_at	3.45906	7.34034	24.6812	2.41673e-09	1.20123e-06	ERI2
213007_at	3.64308	8.74128	24.597	2.4885e-09	1.22575e-06	FANCI
204444_at	4.87055	8.03898	24.3163	2.74566e-09	1.31954e-06	KIF11
219010_at	2.83813	6.92966	24.3078	2.75389e-09	1.31954e-06	C1orf106
221591_s_at	2.36264	6.61846	24.2703	2.79052e-09	1.31954e-06	FAM64A
220358_at	4.72871	8.9853	24.2622	2.79857e-09	1.31954e-06	BATF3
211519_s_at	3.79985	7.03141	24.2612	2.79958e-09	1.31954e-06	KIF2C
204256_at	3.41932	6.2669	24.2063	2.8544e-09	1.33388e-06	ELOVL6
204531_s_at	3.2396	7.33895	24.1247	2.93815e-09	1.36138e-06	BRCA1
209832_s_at	2.92357	6.28052	24.0987	2.96542e-09	1.36247e-06	CDT1
205024_s_at	4.2715	7.50512	24.0042	3.0669e-09	1.39736e-06	RAD51
222938_x_at	2.56902	6.07304	23.9553	3.12096e-09	1.41024e-06	ENPP3
222958_s_at	4.44447	6.78611	23.9228	3.15746e-09	1.41503e-06	DEPDC1
230113_at	-2.60684	5.54369	-23.848	3.24328e-09	1.44168e-06	MBNL3
210334_x_at	3.03218	6.94612	23.6301	3.5084e-09	1.54695e-06	BIRC5
225142_at	-3.48709	5.11886	-23.5697	3.5861e-09	1.56856e-06	JHDM1D
219024_at	-2.54093	5.75305	-23.5158	3.65701e-09	1.57763e-06	PLEKHA1
207828_s_at	4.27937	7.87791	23.4321	3.77029e-09	1.61047e-06	CENPF
221258_s_at	3.25087	6.79063	23.4023	3.81167e-09	1.61553e-06	KIF18A
202580_x_at	3.46944	7.19246	23.3433	3.89485e-09	1.63809e-06	FOXM1
210821_x_at	2.12959	6.85	23.3046	3.95062e-09	1.64886e-06	CENPA
230425_at	6.42268	7.28115	22.9945	4.43022e-09	1.80979e-06	EPHB1
204146_at	3.18179	8.82338	22.9812	4.45228e-09	1.80979e-06	RAD51AP1
212960_at	-2.52513	6.28584	-22.9713	4.46861e-09	1.80979e-06	TBC1D9
221520_s_at	3.35574	7.89908	22.8788	4.6256e-09	1.85959e-06	CDCA8
203213_at	6.61589	8.53939	22.8289	4.71278e-09	1.86333e-06	CDK1
1555758_a_at	5.00489	8.13131	22.827	4.71611e-09	1.86333e-06	CDKN3
235572_at	2.87467	6.72713	22.8151	4.73715e-09	1.86333e-06	SPC24
219306_at	4.02365	7.44858	22.6988	4.94875e-09	1.93266e-06	KIF15
204492_at	2.60934	5.51503	22.6108	5.11594e-09	1.98379e-06	ARHGAP11A
208268_at	-3.33429	6.35172	-22.5645	5.20638e-09	2.00464e-06	ADAM28
214772_at	4.03022	5.12964	22.5085	5.31808e-09	2.03333e-06	KIAA1549L
243968_x_at	-1.90626	6.93603	-22.4413	5.45574e-09	2.05462e-06	FCRL1
229538_s_at	2.39607	5.0479	22.431	5.47711e-09	2.05462e-06	IQGAP3
218521_s_at	-1.62536	7.1789	-22.4266	5.48649e-09	2.05462e-06	UBE2W
46665_at	3.34781	8.08999	22.3058	5.74548e-09	2.12253e-06	SEMA4C
227006_at	2.59883	6.6928	22.2363	5.90082e-09	2.16528e-06	PPP1R14A
212774_at	-2.91181	9.92083	-22.1923	6.00159e-09	2.1759e-06	ZNF238
204126_s_at	3.68878	7.14115	22.1889	6.00935e-09	2.1759e-06	CDC45
225655_at	6.21046	8.46363	22.1673	6.0597e-09	2.1797e-06	UHRF1
209408_at	4.61378	8.2937	22.1312	6.1445e-09	2.19575e-06	KIF2C
234944_s_at	2.93766	6.14708	22.0241	6.40461e-09	2.27385e-06	FAM54A
204170_s_at	3.16677	10.3273	21.8725	6.79376e-09	2.39123e-06	CKS2
213008_at	2.91164	7.80416	21.8616	6.82272e-09	2.39123e-06	FANCI
224753_at	3.82772	8.18015	21.7774	7.05123e-09	2.44004e-06	CDCA5
209714_s_at	4.83846	7.94556	21.6475	7.42096e-09	2.55183e-06	CDKN3
1555772_a_at	3.32674	5.44938	21.3661	8.29766e-09	2.8319e-06	CDC25A
210753_s_at	3.38475	6.59777	21.3537	8.33901e-09	2.8319e-06	EPHB1
219787_s_at	3.07893	7.7883	21.3319	8.4118e-09	2.83898e-06	ECT2
220658_s_at	3.52934	6.81156	21.3074	8.49479e-09	2.8494e-06	ARNTL2
229705_at	-2.04601	6.46074	-21.194	8.89033e-09	2.92819e-06	PIK3C3
204603_at	4.12633	6.80225	21.1224	9.15081e-09	2.97877e-06	EXO1
202531_at	-1.96616	8.8469	-21.0946	9.25423e-09	2.99393e-06	IRF1
237187_at	-3.72964	5.83493	-20.9828	9.68322e-09	3.1143e-06	HRK
213415_at	3.89243	6.4943	20.8979	1.00241e-08	3.20508e-06	CLIC2
203744_at	2.61976	7.54106	20.8788	1.01023e-08	3.2113e-06	HMGB3
226246_at	1.90045	6.47236	20.8391	1.02678e-08	3.23414e-06	KCTD1
1552532_a_at	-3.00287	4.69118	-20.8332	1.02924e-08	3.23414e-06	ATP6V1C2
223723_at	3.28778	5.98565	20.7702	1.0562e-08	3.29986e-06	MFI2
213226_at	3.12772	8.59812	20.7431	1.06798e-08	3.31773e-06	CCNA2
203780_at	2.53239	4.12806	20.6793	1.09643e-08	3.36783e-06	MPZL2
239169_at	2.40329	6.28066	20.6647	1.10305e-08	3.36923e-06	RDM1
238983_at	-4.67115	5.23815	-20.6124	1.12713e-08	3.42364e-06	NSUN7
208079_s_at	4.32699	8.14389	20.5735	1.14541e-08	3.44095e-06	AURKA
219918_s_at	5.43715	7.57132	20.5237	1.16929e-08	3.469e-06	ASPM
222799_at	3.05647	7.67434	20.5145	1.17378e-08	3.469e-06	WDR91
205046_at	3.76417	7.26073	20.4562	1.20262e-08	3.53514e-06	CENPE
203209_at	2.94445	9.24958	20.3437	1.26045e-08	3.67493e-06	RFC5
204252_at	2.13074	8.84598	20.3377	1.26362e-08	3.67493e-06	CDK2
213518_at	2.15055	8.3213	20.3173	1.27445e-08	3.68065e-06	PRKCI
230551_at	3.48016	5.72164	20.3087	1.27906e-08	3.68065e-06	KSR2
235609_at	3.72418	7.23818	20.247	1.31264e-08	3.73823e-06	BRIP1
241599_at	2.16815	5.66036	20.2469	1.31274e-08	3.73823e-06	LSM11
228252_at	2.7026	6.65679	19.9587	1.48312e-08	4.15845e-06	PIF1
218437_s_at	-2.76468	6.36491	-19.9095	1.51462e-08	4.2251e-06	LZTFL1
230179_at	-2.57406	8.34101	-19.8657	1.54332e-08	4.26073e-06	GFOD1
238756_at	3.54082	5.55494	19.8544	1.55077e-08	4.26073e-06	GAS2L3
223304_at	3.37429	7.76788	19.8193	1.57432e-08	4.30381e-06	SLC37A3
227066_at	2.94548	7.8201	19.747	1.62402e-08	4.41758e-06	MOB3C
209602_s_at	4.76488	6.06221	19.6831	1.66944e-08	4.51865e-06	GATA3
203968_s_at	4.07986	6.90222	19.6484	1.69474e-08	4.56452e-06	CDC6
212569_at	-1.62637	9.53176	-19.5778	1.74741e-08	4.66048e-06	SMCHD1
200783_s_at	2.20099	9.40743	19.5334	1.78145e-08	4.7282e-06	STMN1
203373_at	2.9407	7.50974	19.4168	1.87452e-08	4.92736e-06	SOCS2
235911_at	3.47468	8.10385	19.3996	1.88873e-08	4.94097e-06	MFI2
217640_x_at	3.70895	6.07449	19.372	1.91171e-08	4.95369e-06	SKA1
203276_at	2.44855	9.6449	19.3478	1.93218e-08	4.97143e-06	LMNB1
213245_at	4.41384	5.79876	19.3345	1.94347e-08	4.97143e-06	ADCY1
204887_s_at	2.53072	7.43053	19.3299	1.94738e-08	4.97143e-06	PLK4
212462_at	-1.61726	9.55771	-19.312	1.96277e-08	4.97143e-06	KAT6B
206865_at	-2.09791	4.95911	-19.3106	1.96402e-08	4.97143e-06	HRK
221436_s_at	3.3516	7.47303	19.2806	1.99017e-08	5.01441e-06	CDCA3
205883_at	-2.18385	5.2382	-19.2517	2.01565e-08	5.05531e-06	ZBTB16
212820_at	3.90051	6.84532	19.2145	2.04907e-08	5.11565e-06	DMXL2
211714_x_at	2.63395	11.2702	19.1993	2.0629e-08	5.11622e-06	TUBB
202811_at	1.69493	9.27322	19.1937	2.06801e-08	5.11622e-06	STAMBP
212741_at	2.62202	5.73275	19.1564	2.10252e-08	5.16818e-06	MAOA
207183_at	2.15054	5.81861	19.1506	2.10792e-08	5.16818e-06	GPR19
222761_at	2.23551	7.55759	19.1396	2.11825e-08	5.17032e-06	BIVM
204558_at	2.83743	7.36451	19.0478	2.20661e-08	5.36207e-06	RAD54L
202386_s_at	-2.11499	9.14458	-18.9927	2.26159e-08	5.44881e-06	KIAA0430
208893_s_at	2.73027	6.78953	18.992	2.26224e-08	5.44881e-06	DUSP6
222209_s_at	1.89521	8.1602	18.9665	2.28823e-08	5.46327e-06	TMEM135
209604_s_at	4.53279	7.66472	18.9156	2.34109e-08	5.55963e-06	GATA3
221521_s_at	3.44669	8.62755	18.9055	2.35177e-08	5.55963e-06	GINS2
206729_at	2.0361	7.31961	18.8944	2.36348e-08	5.55963e-06	TNFRSF8
202589_at	6.68024	9.97276	18.8837	2.37484e-08	5.55963e-06	TYMS
223556_at	3.64983	8.332	18.8795	2.37943e-08	5.55963e-06	HELLS
205164_at	2.33753	6.49781	18.8501	2.41108e-08	5.60962e-06	GCAT
231855_at	3.24143	6.1635	18.7821	2.48621e-08	5.72645e-06	KIAA1524
218662_s_at	4.98875	7.70754	18.7763	2.49272e-08	5.72645e-06	NCAPG
218911_at	1.37664	8.7393	18.7603	2.51091e-08	5.7441e-06	YEATS4
231772_x_at	2.57278	8.85692	18.7034	2.57641e-08	5.84503e-06	CENPH
213791_at	2.419	5.47967	18.6736	2.61158e-08	5.87605e-06	PENK
204695_at	3.40906	6.80077	18.6532	2.63589e-08	5.90646e-06	CDC25A
219452_at	-3.37946	6.47302	-18.6379	2.65437e-08	5.91279e-06	DPEP2
223461_at	1.8474	7.88736	18.6329	2.66035e-08	5.91279e-06	TBC1D7
203556_at	-2.02397	8.61668	-18.6066	2.69252e-08	5.94541e-06	ZHX2
208891_at	3.56648	7.05576	18.6031	2.69677e-08	5.94541e-06	DUSP6
243951_at	-3.10803	5.22568	-18.5721	2.73519e-08	5.99187e-06	ABCB1
205240_at	2.33899	6.38347	18.5597	2.75073e-08	5.99187e-06	GPSM2
202136_at	-1.83694	8.4944	-18.5491	2.76415e-08	5.99722e-06	ZMYND11
203210_s_at	2.83781	7.64648	18.4767	2.85743e-08	6.1751e-06	RFC5
208890_s_at	1.86331	8.16269	18.4262	2.92449e-08	6.29515e-06	PLXNB2
235088_at	3.55765	7.33394	18.405	2.95331e-08	6.33225e-06	C4orf46
223229_at	4.37614	7.75954	18.3482	3.0317e-08	6.47492e-06	UBE2T
218115_at	2.9248	7.66611	18.3152	3.07836e-08	6.549e-06	ASF1B
222640_at	2.11532	8.11763	18.3066	3.09072e-08	6.5498e-06	DNMT3A
201417_at	2.71718	9.51346	18.2364	3.19299e-08	6.68881e-06	SOX4
208622_s_at	-1.62812	10.292	-18.2343	3.19619e-08	6.68881e-06	EZR
203820_s_at	2.94486	7.34182	18.2282	3.20524e-08	6.68881e-06	IGF2BP3
217080_s_at	2.3557	5.52266	18.1899	3.26286e-08	6.76715e-06	HOMER2
235079_at	-1.73437	4.15196	-18.1812	3.27616e-08	6.76715e-06	ZNF704
227370_at	3.13662	4.56292	18.1787	3.27992e-08	6.76715e-06	FAM171B
235348_at	-1.58631	6.55394	-18.1608	3.30749e-08	6.79838e-06	ABHD13
209680_s_at	2.78192	7.86683	18.1141	3.38045e-08	6.8965e-06	KIFC1
213556_at	1.93696	6.57641	18.0903	3.41834e-08	6.94787e-06	PINLYP
202095_s_at	5.40935	8.07217	18.0708	3.44972e-08	6.98567e-06	BIRC5
213142_x_at	-2.62412	9.23695	-18.0529	3.47883e-08	7.01863e-06	PION
234749_s_at	2.2227	6.1134	17.977	3.60539e-08	7.23009e-06	POC1A
203967_at	4.40497	6.64237	17.9742	3.61009e-08	7.23009e-06	CDC6
204826_at	2.14205	7.67061	17.9185	3.70632e-08	7.39572e-06	CCNF
219039_at	1.86601	7.26158	17.861	3.80863e-08	7.51491e-06	SEMA4C
211080_s_at	2.33274	5.25238	17.8581	3.81382e-08	7.51491e-06	NEK2
205003_at	-2.09521	4.58523	-17.8541	3.82103e-08	7.51491e-06	DOCK4
1558747_at	-2.40558	6.49289	-17.8317	3.86195e-08	7.55421e-06	SMCHD1
205066_s_at	1.91349	4.84843	17.8272	3.87029e-08	7.55421e-06	ENPP1
222077_s_at	3.3016	9.423	17.8185	3.8862e-08	7.55421e-06	RACGAP1
224428_s_at	3.81651	8.46041	17.809	3.90377e-08	7.55421e-06	CDCA7
217388_s_at	2.21798	9.72015	17.7883	3.94252e-08	7.56342e-06	KYNU
201896_s_at	1.72691	5.82448	17.7599	3.99625e-08	7.61306e-06	PSRC1
223600_s_at	-2.76271	5.88577	-17.7445	4.02574e-08	7.64262e-06	KIAA1683
224871_at	-1.69701	8.33101	-17.6793	4.15309e-08	7.83001e-06	TPRG1L
1565525_a_at	-2.77881	4.19493	-17.6546	4.20264e-08	7.89075e-06	TCP11L2
216905_s_at	-2.73164	5.31843	-17.638	4.23623e-08	7.89075e-06	ST14
242271_at	2.54372	5.50344	17.6347	4.24304e-08	7.89075e-06	SLC26A9
226676_at	-2.18625	4.31293	-17.6005	4.31331e-08	7.96829e-06	ZNF521
222848_at	3.01682	8.83905	17.5965	4.32158e-08	7.96829e-06	CENPK
204642_at	-4.32333	7.97344	-17.5688	4.37968e-08	8.03553e-06	S1PR1
204092_s_at	4.34534	7.76318	17.5394	4.44211e-08	8.10858e-06	AURKA
201631_s_at	2.67656	8.43516	17.5328	4.45631e-08	8.10858e-06	IER3
203131_at	4.01059	5.46852	17.5292	4.46399e-08	8.10858e-06	PDGFRA
224499_s_at	7.61956	8.53551	17.4854	4.55947e-08	8.25419e-06	AICDA
205789_at	-3.13922	4.93447	-17.4766	4.57906e-08	8.25419e-06	CD1D
204318_s_at	4.46473	7.18388	17.4719	4.58944e-08	8.25419e-06	GTSE1
226870_at	1.55192	7.62076	17.4454	4.64881e-08	8.33357e-06	COMTD1
230834_at	-3.1987	5.65049	-17.4131	4.72219e-08	8.42795e-06	KIAA0226
209715_at	1.69828	8.14851	17.4001	4.75218e-08	8.42795e-06	CBX5
214710_s_at	4.21243	8.76579	17.3959	4.76197e-08	8.42795e-06	CCNB1
222150_s_at	-2.61668	9.20182	-17.3954	4.76312e-08	8.42795e-06	PION
212914_at	-1.7167	8.42182	-17.3033	4.98181e-08	8.75821e-06	CBX7
235133_at	-1.9011	4.99708	-17.2891	5.01667e-08	8.78747e-06	ZDHHC14
226245_at	2.58577	6.48657	17.2834	5.03059e-08	8.78747e-06	KCTD1
220987_s_at	-3.6416	7.58637	-17.2681	5.06836e-08	8.82524e-06	NUAK2
204135_at	2.37729	5.7317	17.2527	5.10691e-08	8.86414e-06	FILIP1L
217529_at	-2.43863	9.19045	-17.2418	5.13408e-08	8.88e-06	ORAI2
215046_at	-1.42069	4.57463	-17.2361	5.14853e-08	8.88e-06	KANSL1L
222781_s_at	1.8329	8.17497	17.1435	5.38838e-08	9.2549e-06	C9orf40
226136_at	-2.88786	7.94642	-17.1393	5.39975e-08	9.2549e-06	GLIPR1
204159_at	3.76581	7.16294	17.1201	5.45096e-08	9.30159e-06	CDKN2C
201476_s_at	2.36512	7.83511	17.1123	5.47224e-08	9.30159e-06	RRM1
203372_s_at	2.87877	5.68228	17.1101	5.47803e-08	9.30159e-06	SOCS2
200985_s_at	2.74288	10.1032	17.0717	5.58319e-08	9.43969e-06	CD59
1567107_s_at	2.08067	7.7421	17.0588	5.61883e-08	9.43969e-06	TPM4
228069_at	3.44415	8.04667	17.0439	5.6605e-08	9.43969e-06	FAM54A
217196_s_at	2.63632	5.91005	17.043	5.66295e-08	9.43969e-06	CAMSAP2
229383_at	-4.608	6.32521	-17.0333	5.69049e-08	9.45677e-06	2013-03-01
219841_at	7.46978	8.36823	17.0038	5.7743e-08	9.56697e-06	AICDA
243052_at	1.68793	6.0977	16.9692	5.87455e-08	9.70366e-06	MOB3C
212985_at	-3.61699	5.05166	-16.9592	5.90389e-08	9.72275e-06	APBB2
213610_s_at	3.74582	6.95084	16.9207	6.01856e-08	9.88182e-06	KLHL23
226065_at	-2.8227	6.60074	-16.8514	6.23086e-08	1.01998e-05	PRICKLE1
235545_at	3.79662	6.07589	16.837	6.27587e-08	1.02421e-05	DEPDC1
230193_at	1.58967	4.7222	16.8289	6.30159e-08	1.02421e-05	WDR66
212023_s_at	3.88695	6.6047	16.8194	6.33168e-08	1.02421e-05	MKI67
213253_at	2.27663	8.18725	16.8032	6.38335e-08	1.02953e-05	SMC2
239002_at	2.25348	5.22728	16.7741	6.47753e-08	1.04164e-05	ASPM
230165_at	3.45932	7.98398	16.7511	6.55283e-08	1.04745e-05	SGOL2
222631_at	1.7394	9.09423	16.7461	6.56937e-08	1.04745e-05	PI4K2B
219000_s_at	3.35911	7.46661	16.7456	6.57114e-08	1.04745e-05	DSCC1
222317_at	-3.76186	6.09492	-16.6839	6.77901e-08	1.07745e-05	PDE3B
206404_at	-1.76141	5.19382	-16.6619	6.85519e-08	1.0864e-05	FGF9
212579_at	-2.01438	9.85644	-16.6326	6.95763e-08	1.09945e-05	SMCHD1
1555465_at	2.22747	7.52064	16.5999	7.07427e-08	1.11263e-05	MCOLN2
226055_at	-3.37291	8.60966	-16.5904	7.10857e-08	1.11263e-05	ARRDC2
209642_at	4.51982	7.97667	16.5857	7.12552e-08	1.11263e-05	BUB1
231747_at	2.65086	8.6778	16.573	7.17187e-08	1.11263e-05	CYSLTR1
227928_at	2.77179	6.82583	16.5715	7.17733e-08	1.11263e-05	PARPBP
219820_at	-3.9567	5.37752	-16.5683	7.18895e-08	1.11263e-05	SLC6A16
224597_at	-1.56492	10.6571	-16.5645	7.20279e-08	1.11263e-05	LINC00657
212282_at	2.52837	9.1758	16.5642	7.20383e-08	1.11263e-05	TMEM97
239828_at	-2.21354	4.36996	-16.5308	7.32761e-08	1.12856e-05	AKD1
1552682_a_at	2.01327	4.93042	16.4948	7.46369e-08	1.14377e-05	CASC5
221189_s_at	1.33776	7.91568	16.4841	7.50485e-08	1.14377e-05	TARS2
201477_s_at	2.53328	10.303	16.4804	7.51891e-08	1.14377e-05	RRM1
217966_s_at	2.57812	7.69986	16.47	7.55919e-08	1.14377e-05	FAM129A
1568596_a_at	2.10468	7.02574	16.4687	7.56416e-08	1.14377e-05	TROAP
216252_x_at	3.53181	7.29245	16.4664	7.57284e-08	1.14377e-05	FAS
239680_at	3.64599	6.46866	16.4567	7.61066e-08	1.14632e-05	WDR76
205085_at	2.88879	6.49104	16.4131	7.78301e-08	1.16905e-05	ORC1
203057_s_at	-1.73199	9.6088	-16.4032	7.82278e-08	1.17181e-05	PRDM2
218319_at	-2.44265	9.86315	-16.3832	7.9036e-08	1.18068e-05	PELI1
211804_s_at	2.15877	6.41665	16.3582	8.00594e-08	1.18742e-05	CDK2
41660_at	-2.65896	5.8488	-16.3521	8.03112e-08	1.18742e-05	CELSR1
239130_at	-2.21625	5.41282	-16.3504	8.03838e-08	1.18742e-05	MIR101-1
206102_at	4.00162	8.28199	16.3478	8.04909e-08	1.18742e-05	GINS1
219966_x_at	-1.95585	9.14224	-16.3435	8.06685e-08	1.18742e-05	BANP
202870_s_at	4.70489	7.91375	16.3406	8.07905e-08	1.18742e-05	CDC20
212397_at	2.03746	9.01895	16.3195	8.16765e-08	1.19403e-05	RDX
214058_at	3.31974	5.83595	16.3027	8.23894e-08	1.20124e-05	MYCL1
204385_at	2.1131	8.37217	16.2486	8.47301e-08	1.22884e-05	KYNU
223586_at	2.38559	6.90873	16.2477	8.47693e-08	1.22884e-05	ARNTL2
234464_s_at	2.25501	8.48565	16.2393	8.51376e-08	1.22884e-05	EME1
220066_at	3.16331	6.95261	16.2383	8.51815e-08	1.22884e-05	NOD2
210519_s_at	1.78266	6.38689	16.2265	8.5708e-08	1.23318e-05	NQO1
202107_s_at	2.14891	10.0658	16.2043	8.67034e-08	1.24097e-05	MCM2
1554572_a_at	2.73426	7.58544	16.178	8.78949e-08	1.25338e-05	SUV39H2
215380_s_at	2.30036	10.2249	16.1751	8.8029e-08	1.25338e-05	GGCT
226489_at	1.76192	6.86133	16.1276	9.02384e-08	1.28063e-05	TMCC3
226299_at	1.45204	6.36991	16.1239	9.04115e-08	1.28063e-05	PKN3
229809_at	-2.77067	5.16526	-16.1142	9.08722e-08	1.28383e-05	POU6F1
203662_s_at	2.56029	7.23193	16.0789	9.257e-08	1.30445e-05	TMOD1
213734_at	1.89071	8.81069	16.072	9.29012e-08	1.30575e-05	RFC5
227433_at	-1.94683	8.36876	-16.0597	9.3504e-08	1.31085e-05	KIAA2018
228928_x_at	-1.97175	9.13634	-15.9931	9.68366e-08	1.34803e-05	BANP
205547_s_at	-1.8755	6.10668	-15.9928	9.68515e-08	1.34803e-05	TAGLN
229598_at	-2.42574	5.0267	-15.9919	9.68958e-08	1.34803e-05	COBLL1
221601_s_at	-2.46623	9.94677	-15.9823	9.73881e-08	1.35145e-05	FAIM3
235170_at	-1.52705	9.11853	-15.9361	9.97897e-08	1.37868e-05	ZNF92
216952_s_at	2.87056	8.33418	15.9326	9.99777e-08	1.37868e-05	LMNB2
217552_x_at	-3.73497	6.24775	-15.9269	1.00278e-07	1.37868e-05	CR1
201663_s_at	1.80608	8.89477	15.9253	1.0036e-07	1.37868e-05	SMC4
215942_s_at	3.3087	6.27408	15.9089	1.01236e-07	1.38723e-05	GTSE1
226175_at	1.97516	8.1547	15.8675	1.03483e-07	1.41096e-05	TTC9C
216228_s_at	3.30526	6.66983	15.8479	1.04565e-07	1.42216e-05	WDHD1
235385_at	-5.13165	5.75645	-15.8195	1.06152e-07	1.4366e-05	2013-03-01
205628_at	2.64808	7.00144	15.8128	1.06534e-07	1.4382e-05	PRIM2
230966_at	3.26888	7.26998	15.797	1.07432e-07	1.44676e-05	IL4I1
224200_s_at	2.46272	6.38055	15.79	1.07834e-07	1.4486e-05	RAD18
209198_s_at	2.61896	6.82753	15.775	1.08699e-07	1.45664e-05	SYT11
201761_at	1.92747	11.0046	15.761	1.09515e-07	1.46399e-05	MTHFD2
230866_at	2.46098	8.7827	15.719	1.12003e-07	1.49361e-05	CYSLTR1
217234_s_at	-2.01137	8.71837	-15.668	1.15108e-07	1.53128e-05	EZR
225102_at	3.59484	8.44543	15.6424	1.167e-07	1.54869e-05	MGLL
232060_at	-2.17067	5.43979	-15.5967	1.19608e-07	1.58343e-05	ROR1
203616_at	1.40825	9.12965	15.5699	1.21352e-07	1.59269e-05	POLB
223570_at	3.71478	6.31986	15.5669	1.21549e-07	1.59269e-05	MCM10
223377_x_at	2.94451	7.42245	15.5655	1.21642e-07	1.59269e-05	CISH
219510_at	2.7577	7.56231	15.5653	1.21653e-07	1.59269e-05	POLQ
1559413_at	-4.68245	5.80284	-15.5515	1.22561e-07	1.59929e-05	TCP11L2
203358_s_at	2.89588	8.94423	15.5335	1.23762e-07	1.60324e-05	EZH2
204317_at	2.1845	5.70748	15.533	1.23794e-07	1.60324e-05	TRMU
201063_at	1.86494	8.68244	15.5311	1.23923e-07	1.60324e-05	RCN1
206187_at	2.38785	7.24551	15.5294	1.24037e-07	1.60324e-05	PTGIR
223454_at	-2.13983	6.27479	-15.5165	1.24905e-07	1.60822e-05	CXCL16
241365_at	-2.66084	4.90149	-15.515	1.2501e-07	1.60822e-05	SATB1
204026_s_at	5.22019	9.52341	15.5076	1.25511e-07	1.60982e-05	ZWINT
204388_s_at	2.53205	4.60893	15.5045	1.25723e-07	1.60982e-05	MAOA
202735_at	1.35507	8.69632	15.4983	1.26146e-07	1.61145e-05	EBP
230499_at	-2.62365	9.23637	-15.4791	1.2747e-07	1.62394e-05	BIRC3
206502_s_at	5.33224	5.25172	15.4705	1.28063e-07	1.62394e-05	INSM1
217975_at	3.47215	7.01427	15.4687	1.2819e-07	1.62394e-05	WBP5
223845_at	1.55176	4.88674	15.4669	1.28311e-07	1.62394e-05	VSIG10
203870_at	3.19242	7.14139	15.4541	1.29209e-07	1.63152e-05	USP46
218971_s_at	2.19746	8.50881	15.4453	1.2983e-07	1.63313e-05	WDR91
212577_at	-1.3723	9.25742	-15.4438	1.29934e-07	1.63313e-05	SMCHD1
230015_at	-1.93836	5.9522	-15.4137	1.32081e-07	1.65323e-05	PRCD
209603_at	2.95297	5.48839	15.413	1.32137e-07	1.65323e-05	GATA3
219574_at	-4.95706	6.18602	-15.3449	1.37145e-07	1.71196e-05	2013-03-01
225845_at	-1.27919	9.74752	-15.3183	1.39153e-07	1.72522e-05	ZBTB44
223961_s_at	2.82642	6.10351	15.3079	1.39949e-07	1.72725e-05	CISH
224279_s_at	1.67906	5.89986	15.3005	1.40524e-07	1.73044e-05	CABYR
219266_at	-1.51016	6.66578	-15.2946	1.40976e-07	1.7321e-05	ZNF350
204886_at	2.79682	7.33965	15.2765	1.42384e-07	1.74548e-05	PLK4
201774_s_at	2.07911	8.10525	15.2269	1.46332e-07	1.78741e-05	NCAPD2
212281_s_at	2.58758	8.88416	15.2253	1.46458e-07	1.78741e-05	TMEM97
209804_at	1.76696	7.16109	15.2193	1.46939e-07	1.78929e-05	DCLRE1A
216080_s_at	-1.73489	7.24548	-15.2146	1.47324e-07	1.78999e-05	FADS3
218504_at	2.50961	8.20509	15.1769	1.50428e-07	1.81773e-05	FAHD2A
204649_at	2.16036	6.85338	15.1747	1.50605e-07	1.81773e-05	TROAP
239711_at	1.4226	6.07397	15.1612	1.51736e-07	1.82735e-05	ADAL
205126_at	1.80494	9.34325	15.1372	1.53767e-07	1.84773e-05	VRK2
209993_at	-3.32456	5.40292	-15.1322	1.54196e-07	1.84883e-05	ABCB1
239725_at	-2.49956	5.41113	-15.1075	1.56325e-07	1.87026e-05	PGAP1
231303_at	3.17815	8.14142	15.0978	1.57172e-07	1.87628e-05	LINC00158
203517_at	1.50964	8.85636	15.0938	1.57516e-07	1.87629e-05	MTX2
222945_x_at	1.73666	4.90841	15.0626	1.60276e-07	1.90502e-05	OLAH
218090_s_at	-1.20628	10.0992	-15.0302	1.63201e-07	1.93558e-05	WDR11
210663_s_at	2.26489	8.46537	15.0184	1.64274e-07	1.94357e-05	KYNU
228962_at	-3.12552	5.02547	-15.0151	1.64586e-07	1.94357e-05	PDE4D
220060_s_at	2.46495	6.52345	15.0046	1.6555e-07	1.94655e-05	PARPBP
203006_at	-2.51323	8.15395	-14.9878	1.67114e-07	1.95989e-05	INPP5A
209016_s_at	2.9524	6.35908	14.9843	1.67441e-07	1.95989e-05	KRT7
203056_s_at	-2.07028	7.27283	-14.976	1.68221e-07	1.96086e-05	PRDM2
212956_at	-4.72536	8.46198	-14.9724	1.6856e-07	1.96086e-05	TBC1D9
218350_s_at	2.52873	9.2777	14.9422	1.71443e-07	1.99016e-05	GMNN
212733_at	-1.76624	10.587	-14.9335	1.72276e-07	1.9956e-05	KIAA0226
1553989_a_at	-2.13753	5.71334	-14.9184	1.73741e-07	1.99804e-05	ATP6V1C2
202564_x_at	1.95148	8.49948	14.9166	1.73918e-07	1.99804e-05	ARL2
231406_at	-2.30297	9.1907	-14.9163	1.73949e-07	1.99804e-05	ORAI2
223190_s_at	-1.66272	10.001	-14.9082	1.74745e-07	2.00298e-05	MLL5
228739_at	2.73322	5.60911	14.8713	1.78412e-07	2.03647e-05	CYS1
219494_at	3.18879	6.78491	14.8354	1.82062e-07	2.0697e-05	RAD54B
207426_s_at	3.6749	7.98044	14.811	1.84599e-07	2.09265e-05	TNFSF4
219821_s_at	-2.2492	8.16649	-14.8013	1.85606e-07	2.09265e-05	GFOD1
211026_s_at	3.88267	8.85477	14.8011	1.85631e-07	2.09265e-05	MGLL
233186_s_at	-1.82884	8.25591	-14.7956	1.86212e-07	2.09488e-05	BANP
237033_at	-1.74609	6.37041	-14.7805	1.87812e-07	2.10855e-05	FAM159A
215051_x_at	2.68912	7.67147	14.7505	1.91031e-07	2.13555e-05	AIF1
205479_s_at	2.7209	6.08928	14.7438	1.91769e-07	2.13555e-05	PLAU
222033_s_at	3.30915	6.16553	14.7374	1.92466e-07	2.13555e-05	FLT1
222037_at	3.11723	7.48166	14.7355	1.92669e-07	2.13555e-05	MCM4
235982_at	-1.49304	6.6699	-14.7298	1.933e-07	2.13555e-05	FCRL1
1563209_a_at	4.09394	8.69815	14.7289	1.93394e-07	2.13555e-05	MACROD2
231862_at	1.74569	6.38362	14.7273	1.93575e-07	2.13555e-05	CBX5
235278_at	3.88141	10.0422	14.7252	1.93801e-07	2.13555e-05	MACROD2
241887_at	-1.74174	6.05812	-14.7232	1.94023e-07	2.13555e-05	UBE2W
238778_at	-3.17017	5.08563	-14.7216	1.94201e-07	2.13555e-05	MPP7
225927_at	-1.7607	9.98664	-14.7175	1.9465e-07	2.13555e-05	MAP3K1
1555564_a_at	1.79204	4.28773	14.711	1.95376e-07	2.13643e-05	CFI
219301_s_at	-3.18081	5.57767	-14.7051	1.96028e-07	2.13895e-05	CNTNAP2
211310_at	-2.50309	4.82242	-14.6962	1.97026e-07	2.13895e-05	EZH1
208704_x_at	-1.67978	8.49954	-14.6957	1.97081e-07	2.13895e-05	APLP2
223189_x_at	-1.68795	9.4937	-14.6949	1.9717e-07	2.13895e-05	MLL5
205704_s_at	2.04074	7.78822	14.6866	1.98108e-07	2.14208e-05	ATP6V0A2
209949_at	2.34677	8.07821	14.6854	1.98243e-07	2.14208e-05	NCF2
203409_at	2.41168	9.21043	14.6673	2.00309e-07	2.15888e-05	DDB2
208002_s_at	2.33458	8.34459	14.6648	2.00587e-07	2.15888e-05	ACOT7
204781_s_at	2.96775	8.7191	14.5904	2.0932e-07	2.24844e-05	FAS
240806_at	-1.78832	6.60121	-14.5798	2.10593e-07	2.25382e-05	RPL15
209075_s_at	-1.5285	11.132	-14.5794	2.10645e-07	2.25382e-05	ISCU
222270_at	-3.1245	6.21427	-14.5596	2.13052e-07	2.27303e-05	SMEK2
242388_x_at	-2.69692	7.9813	-14.5565	2.13436e-07	2.27303e-05	TAGAP
226565_at	1.34778	7.23925	14.5484	2.14431e-07	2.27303e-05	TMEM99
244313_at	-3.81654	6.17606	-14.5448	2.14874e-07	2.27303e-05	CR1
236852_at	2.25265	5.62355	14.5443	2.14935e-07	2.27303e-05	FBXO43
226485_at	2.75857	5.34987	14.5278	2.16995e-07	2.27821e-05	VSIG10
201760_s_at	2.3258	9.75422	14.5249	2.17349e-07	2.27821e-05	WSB2
226355_at	1.97803	7.06287	14.5248	2.17361e-07	2.27821e-05	POC1A
1553183_at	3.84315	4.6353	14.5238	2.17493e-07	2.27821e-05	UMODL1
213906_at	2.2238	5.62609	14.5237	2.17508e-07	2.27821e-05	MYBL1
229934_at	-3.0325	5.20265	-14.5176	2.18271e-07	2.28183e-05	MIR223
238451_at	-1.22042	3.7616	-14.5044	2.19942e-07	2.29491e-05	MPP7
205054_at	-1.65318	4.48663	-14.4852	2.22394e-07	2.31607e-05	NEB
244779_at	-1.90996	5.61732	-14.4705	2.2428e-07	2.32685e-05	ZDHHC2
236823_at	-1.53774	4.53555	-14.4571	2.26032e-07	2.34058e-05	IDS
223423_at	-2.21337	8.47795	-14.4504	2.26908e-07	2.34521e-05	GPR160
219938_s_at	3.79177	6.94856	14.4394	2.28357e-07	2.35574e-05	PSTPIP2
223417_at	1.94766	6.54509	14.4303	2.29568e-07	2.36044e-05	RAD18
206760_s_at	4.16962	7.76125	14.4295	2.29676e-07	2.36044e-05	FCER2
224801_at	2.03695	6.14613	14.4091	2.32405e-07	2.37954e-05	NDFIP2
222582_at	-2.04423	7.0122	-14.3961	2.34165e-07	2.39015e-05	PRKAG2
205034_at	3.85619	6.70221	14.395	2.34316e-07	2.39015e-05	CCNE2
225687_at	2.3921	7.42531	14.3815	2.36161e-07	2.40111e-05	FAM83D
203773_x_at	1.94567	8.86878	14.3807	2.36268e-07	2.40111e-05	BLVRA
200873_s_at	1.20264	11.9007	14.3723	2.3743e-07	2.40844e-05	CCT8
202330_s_at	2.26543	9.2555	14.3557	2.39737e-07	2.42285e-05	UNG
224728_at	1.59281	7.78577	14.3484	2.40755e-07	2.42865e-05	ATPAF1
218741_at	1.69432	8.1529	14.3416	2.41713e-07	2.43382e-05	CENPM
201930_at	2.25405	10.0342	14.3326	2.42982e-07	2.44142e-05	MCM6
223159_s_at	2.03257	7.45939	14.33	2.4336e-07	2.44142e-05	NEK6
224204_x_at	2.65599	7.11801	14.3225	2.44418e-07	2.44381e-05	ARNTL2
222777_s_at	2.21081	7.13033	14.3052	2.46906e-07	2.46343e-05	WHSC1
206176_at	-1.53653	5.40704	-14.3009	2.47531e-07	2.46517e-05	BMP6
241682_at	2.24087	6.09921	14.2718	2.51778e-07	2.5029e-05	KLHL23
219293_s_at	1.16887	10.9842	14.2631	2.53069e-07	2.51117e-05	OLA1
225366_at	2.473	7.23876	14.2505	2.54941e-07	2.52516e-05	PGM2
220206_at	-2.38089	5.5523	-14.236	2.57126e-07	2.53972e-05	ZMYM1
204798_at	3.80914	7.83004	14.2144	2.604e-07	2.5618e-05	MYB
204504_s_at	2.07274	7.94784	14.2121	2.60758e-07	2.5618e-05	HIRIP3
230069_at	1.33037	8.31122	14.2106	2.60983e-07	2.5618e-05	SFXN1
219493_at	4.13536	8.22485	14.1927	2.63755e-07	2.58266e-05	SHCBP1
221207_s_at	-1.6232	5.42719	-14.1907	2.64052e-07	2.58266e-05	NBEA
223274_at	2.76186	7.96344	14.1767	2.66244e-07	2.59945e-05	TCF19
229723_at	-2.35066	9.46278	-14.1493	2.70589e-07	2.63618e-05	TAGAP
203661_s_at	2.68994	7.38186	14.1468	2.70979e-07	2.63618e-05	TMOD1
207361_at	-2.39118	4.48603	-14.1439	2.71453e-07	2.63618e-05	HBP1
226069_at	-2.55188	5.42992	-14.1308	2.73564e-07	2.64792e-05	PRICKLE1
219080_s_at	1.8162	6.65837	14.1303	2.7363e-07	2.64792e-05	CTPS2
226436_at	2.74937	6.69205	14.1159	2.75976e-07	2.6659e-05	RASSF4
209763_at	2.20896	5.33145	14.0911	2.80061e-07	2.69852e-05	CHRDL1
201368_at	-2.73326	10.4192	-14.0894	2.8034e-07	2.69852e-05	ZFP36L2
201482_at	1.36317	7.54873	14.0782	2.82202e-07	2.71081e-05	QSOX1
1552344_s_at	-1.74833	7.21014	-14.0758	2.82609e-07	2.71081e-05	CNOT7
232020_at	-2.46507	5.19613	-14.0711	2.83402e-07	2.71275e-05	SMURF2
203819_s_at	2.403	7.1656	14.0687	2.83803e-07	2.71275e-05	IGF2BP3
213039_at	-1.50629	10.0463	-14.0595	2.85357e-07	2.72284e-05	ARHGEF18
205909_at	3.48015	7.5409	14.0528	2.86498e-07	2.72897e-05	POLE2
235583_at	2.45941	6.49448	14.0449	2.87851e-07	2.73709e-05	ILDR1
228345_at	-1.51092	7.68528	-14.0393	2.88803e-07	2.74137e-05	CHIC1
208269_s_at	-1.48019	6.40577	-14.0315	2.90157e-07	2.74469e-05	ADAM28
219975_x_at	2.21613	4.35373	14.0219	2.91817e-07	2.75563e-05	OLAH
226148_at	-1.43149	9.72816	-14.0134	2.93296e-07	2.76482e-05	ZBTB44
225150_s_at	1.44493	5.91612	13.9923	2.97005e-07	2.79496e-05	RTKN
234725_s_at	-2.75063	7.7035	-13.9879	2.97788e-07	2.79752e-05	SEMA4B
218883_s_at	3.54893	9.27128	13.9722	3.00592e-07	2.81901e-05	MLF1IP
235892_at	-1.5181	3.70486	-13.9626	3.02316e-07	2.82701e-05	C11orf92
209485_s_at	2.79837	5.26445	13.9617	3.02478e-07	2.82701e-05	OSBPL1A
228061_at	3.1154	6.36907	13.9554	3.03625e-07	2.83289e-05	CCDC126
201403_s_at	2.30828	9.59546	13.9482	3.04929e-07	2.8402e-05	MGST3
220011_at	2.06243	6.45565	13.9287	3.08513e-07	2.86383e-05	AUNIP
212512_s_at	1.55834	8.40322	13.9238	3.09416e-07	2.86734e-05	CARM1
201202_at	2.98453	11.1744	13.9173	3.1063e-07	2.87372e-05	PCNA
218957_s_at	1.30366	8.46864	13.9128	3.11458e-07	2.87651e-05	PAAF1
225725_at	1.83897	9.46709	13.9038	3.13159e-07	2.88249e-05	ZMAT3
228737_at	3.29129	7.81888	13.897	3.14428e-07	2.88931e-05	TOX2
200989_at	-1.31631	11.6708	-13.8692	3.1972e-07	2.933e-05	HIF1A
1556097_at	3.19419	5.58386	13.8634	3.20851e-07	2.93652e-05	HOMER2
226677_at	-2.15163	3.79644	-13.8617	3.21178e-07	2.93652e-05	ZNF521
208248_x_at	-1.80234	8.74527	-13.8526	3.22941e-07	2.94771e-05	APLP2
223498_at	1.9206	6.39313	13.8494	3.23565e-07	2.94848e-05	SPECC1
1555831_s_at	1.71472	7.59916	13.8448	3.24452e-07	2.95165e-05	LRRC41
219753_at	3.77441	8.95433	13.8341	3.26559e-07	2.96188e-05	STAG3
215719_x_at	3.57111	8.02847	13.8336	3.2666e-07	2.96188e-05	FAS
212445_s_at	1.60295	7.44212	13.821	3.2914e-07	2.97942e-05	NEDD4L
233748_x_at	-1.47123	6.54225	-13.8008	3.33178e-07	3.01099e-05	PRKAG2
233852_at	1.66046	7.37507	13.7932	3.34722e-07	3.01498e-05	POLH
212572_at	1.59338	9.3102	13.7873	3.35907e-07	3.02068e-05	STK38L
225240_s_at	-1.84614	8.62258	-13.7786	3.37678e-07	3.03162e-05	MSI2
211851_x_at	1.6574	6.69638	13.7496	3.43665e-07	3.07024e-05	BRCA1
222993_at	1.32951	9.27381	13.7455	3.44523e-07	3.07186e-05	MRPL37
204407_at	2.29431	8.70999	13.7366	3.46393e-07	3.07541e-05	TTF2
206825_at	3.0019	6.76852	13.7231	3.49249e-07	3.09484e-05	OXTR
1558426_x_at	-2.04968	9.55635	-13.7112	3.51768e-07	3.11212e-05	ORAI2
218177_at	-1.22942	7.11445	-13.7052	3.53069e-07	3.11368e-05	CHMP1B
209558_s_at	-2.49995	8.30666	-13.7051	3.53083e-07	3.11368e-05	HIP1R
208126_s_at	1.83573	5.04929	13.6991	3.5438e-07	3.12008e-05	CYP2C18
215044_s_at	1.56079	5.99179	13.6788	3.58786e-07	3.15374e-05	STAM2
212758_s_at	-1.30238	7.74021	-13.6715	3.60386e-07	3.15374e-05	ZEB1
225340_s_at	1.45817	10.7271	13.6709	3.6051e-07	3.15374e-05	CAPRIN1
227742_at	5.1766	7.31728	13.6642	3.61975e-07	3.1615e-05	CLIC6
223875_s_at	-1.59756	7.52269	-13.6593	3.6307e-07	3.166e-05	EPC1
206181_at	2.89888	9.30143	13.6432	3.66658e-07	3.18505e-05	SLAMF1
219953_s_at	1.33844	7.40203	13.6416	3.67002e-07	3.18505e-05	AKIP1
212020_s_at	3.37836	6.33981	13.6305	3.69497e-07	3.18797e-05	MKI67
212959_s_at	-1.5968	9.22834	-13.6278	3.70111e-07	3.18797e-05	GNPTAB
205687_at	1.68366	6.37236	13.6255	3.70636e-07	3.18797e-05	UBFD1
218209_s_at	1.96062	7.39196	13.6238	3.71033e-07	3.18797e-05	RPRD1A
200640_at	-1.20152	11.1871	-13.6228	3.71253e-07	3.18797e-05	YWHAZ
205749_at	3.27017	6.15273	13.6221	3.71414e-07	3.18797e-05	CYP1A1
219282_s_at	1.23693	7.78205	13.6214	3.71577e-07	3.18797e-05	TRPV2
226747_at	1.81308	7.45662	13.6195	3.72003e-07	3.18797e-05	TXNDC16
226107_at	-1.37215	7.24178	-13.6101	3.74153e-07	3.20138e-05	C1GALT1
218806_s_at	-2.42961	5.77151	-13.6066	3.74939e-07	3.20309e-05	VAV3
203504_s_at	-3.46435	5.11164	-13.5983	3.76863e-07	3.21451e-05	ABCA1
227122_at	-2.07825	7.45577	-13.5936	3.77945e-07	3.21872e-05	ZNF791
227083_at	-2.35459	4.56185	-13.5783	3.81502e-07	3.24395e-05	B3GALTL
211450_s_at	2.36614	7.81925	13.5658	3.84444e-07	3.26389e-05	MSH6
1562019_at	1.81218	3.848	13.5557	3.86834e-07	3.27854e-05	NT5DC4
205049_s_at	-2.05827	9.07971	-13.5529	3.87501e-07	3.27854e-05	CD79A
219236_at	1.41951	6.57596	13.547	3.8891e-07	3.28143e-05	PAQR6
227221_at	2.34061	8.59801	13.5426	3.89966e-07	3.28246e-05	ZMAT3
208944_at	-2.35686	8.2671	-13.5263	3.93882e-07	3.30299e-05	TGFBR2
208799_at	1.71512	9.42366	13.5161	3.96379e-07	3.31884e-05	PSMB5
219502_at	3.30322	5.91109	13.5078	3.98402e-07	3.33068e-05	NEIL3
1570505_at	-3.47747	5.50124	-13.4857	4.0386e-07	3.37115e-05	ABCB4
56256_at	-1.81591	9.89835	-13.4829	4.0456e-07	3.37185e-05	SIDT2
220137_at	2.15964	4.68009	13.4602	4.10274e-07	3.41426e-05	VSIG10
202235_at	1.34421	6.11454	13.4562	4.11295e-07	3.41756e-05	SLC16A1
1559263_s_at	-1.50292	9.71833	-13.4392	4.15643e-07	3.44845e-05	ZC3H12D
225723_at	2.5449	8.75358	13.4318	4.17559e-07	3.4539e-05	CCDC167
228952_at	1.30911	4.76523	13.4315	4.17627e-07	3.4539e-05	ENPP1
238929_at	-1.72264	7.44209	-13.427	4.18805e-07	3.4539e-05	SRSF8
222572_at	-1.79312	8.77487	-13.4269	4.18827e-07	3.4539e-05	PDP1
219424_at	3.37078	9.28417	13.407	4.2403e-07	3.48629e-05	EBI3
203869_at	1.83283	7.87141	13.3957	4.26998e-07	3.50016e-05	USP46
235049_at	2.4987	5.72767	13.3804	4.31091e-07	3.52843e-05	ADCY1
236265_at	-1.11179	9.44424	-13.3774	4.31884e-07	3.52964e-05	SP4
225658_at	-1.26658	9.28458	-13.3738	4.32848e-07	3.53223e-05	SPOPL
226122_at	-1.85081	8.21717	-13.3596	4.36682e-07	3.55821e-05	PLEKHG1
204471_at	5.47263	5.45322	13.3515	4.38908e-07	3.57102e-05	GAP43
219928_s_at	1.90627	5.54607	13.3442	4.40892e-07	3.58184e-05	CABYR
223530_at	1.83587	5.8453	13.3304	4.44697e-07	3.60163e-05	TDRKH
205599_at	2.51883	8.23923	13.3283	4.45304e-07	3.60163e-05	TRAF1
218392_x_at	1.66922	8.4178	13.3194	4.47762e-07	3.61616e-05	SFXN1
203578_s_at	1.35734	5.69942	13.2963	4.54279e-07	3.65259e-05	SLC7A6
212858_at	1.94894	7.07821	13.294	4.54946e-07	3.65259e-05	PAQR4
208206_s_at	-3.61187	7.50883	-13.2847	4.57579e-07	3.66835e-05	RASGRP2
200866_s_at	-2.17887	8.83248	-13.2778	4.5957e-07	3.67891e-05	PSAP
38340_at	-1.91884	8.37177	-13.2732	4.60903e-07	3.68278e-05	HIP1R
211898_s_at	2.22337	5.48596	13.2714	4.614e-07	3.68278e-05	EPHB1
241801_at	-2.83365	4.86288	-13.2555	4.66045e-07	3.71443e-05	PGAP1
229498_at	-1.92289	8.80285	-13.2504	4.67524e-07	3.72079e-05	MBNL3
223158_s_at	1.97169	8.44425	13.2307	4.73345e-07	3.75851e-05	NEK6
228314_at	2.15458	7.65142	13.2283	4.74057e-07	3.75851e-05	LRRC8C
201779_s_at	-1.40565	9.27642	-13.2274	4.74325e-07	3.75851e-05	RNF13
220162_s_at	1.59001	5.17965	13.2187	4.76935e-07	3.76827e-05	CARD9
202193_at	1.52561	7.5533	13.2039	4.81394e-07	3.79476e-05	LIMK2
205598_at	1.22994	6.44223	13.2029	4.81676e-07	3.79476e-05	TRAIP
201275_at	1.63263	10.5552	13.1879	4.86264e-07	3.81989e-05	FDPS
218719_s_at	2.22095	7.08844	13.184	4.87438e-07	3.82362e-05	GINS3
229265_at	-1.99404	8.53226	-13.1768	4.89663e-07	3.83558e-05	SKI
204728_s_at	2.7422	6.44611	13.1675	4.92537e-07	3.84912e-05	WDHD1
220448_at	2.19163	5.19171	13.1667	4.928e-07	3.84912e-05	KCNK12
225533_at	1.63052	7.7031	13.1615	4.94419e-07	3.85626e-05	PHF19
202005_at	-1.83554	6.71894	-13.154	4.96754e-07	3.86895e-05	ST14
221223_x_at	2.09374	7.47009	13.1242	5.06199e-07	3.92792e-05	CISH
228382_at	2.06043	6.42291	13.1233	5.06481e-07	3.92792e-05	FAM105B
202638_s_at	2.80515	7.64916	13.1166	5.08641e-07	3.93709e-05	ICAM1
225105_at	3.84185	9.88216	13.112	5.10123e-07	3.93709e-05	C12orf75
204793_at	-2.79483	5.91685	-13.1088	5.11162e-07	3.93709e-05	GPRASP1
229312_s_at	-1.44369	6.70953	-13.1085	5.11263e-07	3.93709e-05	GKAP1
37152_at	-1.23386	8.0386	-13.0915	5.16783e-07	3.96921e-05	PPARD
216548_x_at	1.61351	6.71163	13.0881	5.17913e-07	3.96921e-05	HMGB3P1
211874_s_at	-1.2913	6.32029	-13.0857	5.18702e-07	3.96921e-05	KAT6B
212519_at	1.29103	11.5044	13.0826	5.19736e-07	3.96921e-05	UBE2E1
206759_at	3.663	6.89108	13.0824	5.19791e-07	3.96921e-05	FCER2
223287_s_at	-2.17654	9.01149	-13.0755	5.22072e-07	3.98107e-05	FOXP1
215339_at	-2.05881	4.38462	-13.0563	5.28466e-07	4.01862e-05	NKTR
210115_at	2.54659	7.32474	13.0529	5.29616e-07	4.02177e-05	RPL39L
204971_at	2.21171	5.11575	13.047	5.31601e-07	4.03124e-05	CSTA
226101_at	-1.29558	8.39396	-13.021	5.40485e-07	4.08307e-05	PRKCE
219555_s_at	3.10031	8.12231	13.0204	5.40676e-07	4.08307e-05	CENPN
200984_s_at	3.04757	9.72641	13.0046	5.46156e-07	4.1131e-05	CD59
202094_at	3.29048	6.41277	13.0014	5.47286e-07	4.11594e-05	BIRC5
223278_at	5.44064	5.70756	12.9911	5.50895e-07	4.13739e-05	GJB2
209684_at	2.88903	4.76859	12.9737	5.57052e-07	4.17789e-05	RIN2
201764_at	2.22295	9.03108	12.963	5.6089e-07	4.19516e-05	TMEM106C
218549_s_at	1.8365	9.11751	12.9531	5.64438e-07	4.21593e-05	FAM82B
222778_s_at	1.52737	6.45089	12.9493	5.65802e-07	4.21797e-05	WHSC1
205588_s_at	1.12052	7.60613	12.9481	5.66253e-07	4.21797e-05	FGFR1OP
212195_at	-2.82152	7.98261	-12.9366	5.70422e-07	4.24324e-05	IL6ST
205519_at	2.64844	6.75906	12.9257	5.74421e-07	4.2614e-05	WDR76
219122_s_at	1.619	7.77909	12.9147	5.7849e-07	4.28576e-05	THG1L
205259_at	-1.67773	6.1233	-12.9021	5.8322e-07	4.31496e-05	NR3C2
203603_s_at	-2.93122	6.3191	-12.8947	5.85979e-07	4.32952e-05	ZEB2
200871_s_at	-2.3758	10.1249	-12.8923	5.86909e-07	4.33053e-05	PSAP
243521_at	-1.8594	6.26277	-12.879	5.91941e-07	4.36178e-05	ZXDA
202911_at	1.75622	10.0528	12.8624	5.98277e-07	4.39351e-05	MSH6
218184_at	-2.16435	7.23093	-12.8598	5.99295e-07	4.39351e-05	TULP4
227653_at	1.39271	7.27231	12.8594	5.99462e-07	4.39351e-05	TRMT5
228315_at	1.71725	9.80212	12.8343	6.09238e-07	4.45322e-05	ZMAT3
228249_at	2.68561	5.40075	12.8261	6.1247e-07	4.45729e-05	C11orf74
230708_at	-1.85791	6.18989	-12.8255	6.12704e-07	4.45729e-05	PRICKLE1
219628_at	1.75298	8.89075	12.8246	6.13056e-07	4.45729e-05	ZMAT3
219208_at	1.67692	6.07908	12.8173	6.15983e-07	4.47263e-05	FBXO11
235113_at	2.09766	9.00885	12.8094	6.19117e-07	4.48942e-05	LRR1
206316_s_at	1.42282	8.29364	12.788	6.27775e-07	4.54617e-05	KNTC1
1556308_at	3.01108	6.84774	12.783	6.29794e-07	4.55476e-05	PRRT3
212565_at	2.31266	6.90921	12.7684	6.35786e-07	4.59202e-05	STK38L
213567_at	-1.32581	8.00273	-12.7625	6.38208e-07	4.59786e-05	KPNA4
223276_at	4.82241	7.30346	12.7624	6.38277e-07	4.59786e-05	C5orf62
209595_at	1.06499	6.40951	12.7434	6.462e-07	4.64271e-05	GTF2F2
225811_at	-1.68359	8.94677	-12.7404	6.47444e-07	4.64554e-05	C11orf58
204718_at	-1.67863	5.69025	-12.7355	6.49495e-07	4.65414e-05	EPHB6
1553709_a_at	1.51376	8.9241	12.7324	6.50832e-07	4.65762e-05	PRPF38A
214283_at	1.33064	7.1961	12.7251	6.53934e-07	4.6676e-05	TMEM97
209279_s_at	1.10217	6.96828	12.7195	6.56311e-07	4.67846e-05	NSDHL
211729_x_at	1.84266	8.94146	12.7167	6.57512e-07	4.68092e-05	BLVRA
239898_x_at	2.02104	6.50873	12.701	6.64257e-07	4.72279e-05	ZNF286A
227564_at	-2.21317	6.02198	-12.6976	6.65729e-07	4.72711e-05	HGSNAT
205965_at	2.26804	8.38473	12.6782	6.742e-07	4.78105e-05	BATF
222999_s_at	-1.37257	9.39652	-12.6627	6.81093e-07	4.81744e-05	CCNL2
202423_at	-1.72592	9.34488	-12.6541	6.84911e-07	4.83818e-05	KAT6A
227100_at	-1.95669	5.52141	-12.6498	6.86861e-07	4.84263e-05	B3GALTL
205329_s_at	1.737	8.62224	12.6488	6.87313e-07	4.84263e-05	SNX4
221778_at	-3.38569	7.67496	-12.6235	6.98764e-07	4.91e-05	JHDM1D
212406_s_at	-1.40436	9.70782	-12.6218	6.99569e-07	4.91e-05	PCMTD2
224799_at	2.31172	6.86854	12.5904	7.1414e-07	4.99142e-05	NDFIP2
215017_s_at	2.75773	5.58057	12.5889	7.14821e-07	4.99142e-05	FNBP1L
212038_s_at	1.44736	11.0615	12.5865	7.15959e-07	4.99299e-05	VDAC1
207590_s_at	2.37712	5.89553	12.5711	7.23229e-07	5.03726e-05	CENPI
202510_s_at	3.0724	6.93424	12.5645	7.26401e-07	5.05292e-05	TNFAIP2
209412_at	-1.80775	8.71992	-12.5528	7.32012e-07	5.07903e-05	TRAPPC10
206074_s_at	1.74883	9.61799	12.5435	7.36489e-07	5.10362e-05	HMGA1
214582_at	-2.99326	6.2477	-12.5188	7.48619e-07	5.16391e-05	PDE3B
207522_s_at	-1.97147	9.05404	-12.5156	7.50207e-07	5.16391e-05	ATP2A3
227406_at	-1.87813	7.65578	-12.5155	7.50229e-07	5.16391e-05	GABPB1-AS1
214607_at	2.27858	5.79703	12.5135	7.51243e-07	5.16391e-05	PAK3
229070_at	3.77824	8.30935	12.5119	7.52049e-07	5.16391e-05	ADTRP
239401_at	-4.34453	6.43213	-12.5103	7.52821e-07	5.16391e-05	S1PR1
225491_at	3.24482	4.41923	12.5102	7.52851e-07	5.16391e-05	SLC1A2
232596_at	2.60576	5.4939	12.5086	7.5369e-07	5.16391e-05	DIAPH3
201780_s_at	-1.20414	9.2721	-12.5046	7.55658e-07	5.17091e-05	RNF13
213532_at	-1.46874	8.37518	-12.5021	7.56917e-07	5.17305e-05	ADAM17
204044_at	2.59951	7.11627	12.4967	7.5961e-07	5.18498e-05	QPRT
221269_s_at	-1.21067	9.1189	-12.4849	7.65554e-07	5.21176e-05	SH3BGRL3
213787_s_at	1.57209	8.98166	12.4841	7.65994e-07	5.21176e-05	EBP
202962_at	1.42882	8.20484	12.4833	7.66394e-07	5.21176e-05	KIF13B
205686_s_at	2.99826	7.74634	12.4778	7.69185e-07	5.21975e-05	CD86
212619_at	1.67222	5.61673	12.4772	7.69478e-07	5.21975e-05	TMEM194A
224627_at	-1.15792	7.52466	-12.4746	7.70829e-07	5.22078e-05	GBA2
225955_at	-2.63529	6.22486	-12.4726	7.71834e-07	5.22078e-05	METRNL
244293_at	-1.63671	4.42736	-12.4713	7.72493e-07	5.22078e-05	UQCRB
237395_at	2.75795	4.20965	12.4677	7.74335e-07	5.22198e-05	CYP4Z1
203385_at	-1.09384	7.4451	-12.4594	7.78615e-07	5.2382e-05	DGKA
232166_at	-1.98211	4.94145	-12.4589	7.78904e-07	5.2382e-05	KIAA1377
223248_at	-1.38715	7.033	-12.4493	7.83838e-07	5.25327e-05	HSDL1
203033_x_at	2.01594	9.66271	12.449	7.84028e-07	5.25327e-05	FH
201641_at	1.33392	9.26767	12.4402	7.8859e-07	5.27738e-05	BST2
215498_s_at	-1.24313	8.52894	-12.4344	7.9167e-07	5.29151e-05	MAP2K3
221824_s_at	-1.71876	8.72389	-12.4284	7.94816e-07	5.29958e-05	2013-03-08
201932_at	1.46027	8.23344	12.4251	7.96564e-07	5.30477e-05	LRRC41
53912_at	1.67788	8.06985	12.4093	8.04979e-07	5.34373e-05	SNX11
210933_s_at	3.16966	6.59757	12.4091	8.05075e-07	5.34373e-05	FSCN1
213095_x_at	2.24357	7.38037	12.4048	8.07407e-07	5.35091e-05	AIF1
213036_x_at	-1.80594	9.5584	-12.4023	8.08758e-07	5.35337e-05	ATP2A3
213523_at	2.35295	7.76668	12.3963	8.11973e-07	5.35624e-05	CCNE1
212065_s_at	-1.32785	6.91971	-12.3959	8.12173e-07	5.35624e-05	USP34
203575_at	1.60191	8.43015	12.3942	8.1311e-07	5.35624e-05	CSNK2A2
209790_s_at	2.25196	7.73674	12.3881	8.16434e-07	5.35875e-05	CASP6
212801_at	1.43755	7.15097	12.3867	8.17201e-07	5.35875e-05	CIT
212312_at	1.73848	8.64267	12.3835	8.18908e-07	5.36088e-05	BCL2L1
212320_at	2.57321	11.1292	12.3821	8.19697e-07	5.36088e-05	TUBB
225117_at	-1.31892	9.68106	-12.3724	8.25032e-07	5.38932e-05	KANSL1
219279_at	1.84579	9.71732	12.3698	8.26431e-07	5.39103e-05	DOCK10
208386_x_at	1.43633	4.75335	12.3683	8.27265e-07	5.39103e-05	DMC1
208885_at	1.84698	11.1583	12.3556	8.34345e-07	5.43069e-05	LCP1
209773_s_at	6.61944	9.12591	12.3538	8.35352e-07	5.43078e-05	RRM2
210889_s_at	-3.85174	7.67079	-12.351	8.36905e-07	5.43441e-05	FCGR2B
228606_at	1.77165	7.78627	12.347	8.39129e-07	5.44081e-05	TCTEX1D2
226449_at	-1.1054	9.22225	-12.3308	8.48269e-07	5.47777e-05	CEP120
202964_s_at	1.18124	8.32074	12.3303	8.4859e-07	5.47777e-05	RFX5
224709_s_at	-1.1364	11.4481	-12.3248	8.51692e-07	5.48483e-05	CDC42SE2
225849_s_at	1.38653	10.7757	12.3067	8.62115e-07	5.54542e-05	SFT2D1
201986_at	-1.10386	8.91611	-12.3043	8.63502e-07	5.54782e-05	MED13
225461_at	-1.59507	9.77248	-12.2997	8.66147e-07	5.55828e-05	EHMT1
219294_at	1.78762	7.15371	12.2939	8.69513e-07	5.57334e-05	CENPQ
1552789_at	-2.50937	6.6351	-12.2898	8.71899e-07	5.5821e-05	SEC62
218812_s_at	-2.33602	7.67505	-12.2813	8.76936e-07	5.60123e-05	ORAI2
225684_at	1.7648	8.78595	12.2788	8.784e-07	5.60361e-05	SKA2
208839_s_at	1.40278	8.6625	12.2645	8.86907e-07	5.63258e-05	CAND1
226844_at	-1.34248	6.74473	-12.2637	8.8735e-07	5.63258e-05	MOB3B
238015_at	2.21901	7.67896	12.2597	8.89772e-07	5.63258e-05	C4orf46
225859_at	-1.13516	7.43769	-12.2595	8.89887e-07	5.63258e-05	XIAP
219748_at	1.31109	6.71974	12.2591	8.90086e-07	5.63258e-05	TREML2
239300_at	-1.78237	6.45972	-12.2477	8.96938e-07	5.66937e-05	PIK3C3
227414_at	-1.22504	7.88212	-12.2433	8.99609e-07	5.67969e-05	RHBDD1
218253_s_at	1.46321	9.70671	12.2372	9.03362e-07	5.69681e-05	EIF2D
1570253_a_at	1.51287	6.7146	12.2291	9.08296e-07	5.71605e-05	RHEBL1
238798_at	-1.89331	5.66744	-12.2148	9.17103e-07	5.76352e-05	TAPT1
238513_at	2.36342	5.96064	12.2108	9.19584e-07	5.76833e-05	PRRG4
209716_at	2.08161	7.07752	12.2101	9.19978e-07	5.76833e-05	CSF1
204315_s_at	1.84419	5.78422	12.2042	9.23694e-07	5.78499e-05	GTSE1
208877_at	-1.00054	9.66596	-12.1992	9.26807e-07	5.79785e-05	PAK2
208886_at	1.92774	6.26123	12.1915	9.31635e-07	5.81848e-05	H1F0
202445_s_at	-1.5181	5.59586	-12.1889	9.33298e-07	5.81848e-05	NOTCH2
202441_at	1.71386	8.3107	12.1854	9.35528e-07	5.82574e-05	ERLIN1
202421_at	3.80792	7.46168	12.1671	9.47193e-07	5.89167e-05	IGSF3
1552370_at	1.83899	6.79385	12.1646	9.48781e-07	5.89484e-05	C4orf33
1554600_s_at	2.78937	7.68402	12.1589	9.52448e-07	5.91091e-05	LMNA
204727_at	3.48116	5.87506	12.1536	9.55898e-07	5.92559e-05	WDHD1
202007_at	3.64446	5.95984	12.1478	9.59639e-07	5.94205e-05	NID1
242787_at	2.0241	7.16805	12.138	9.66024e-07	5.97482e-05	INCENP
226610_at	1.97428	8.36833	12.1333	9.69125e-07	5.98365e-05	CENPV
204023_at	2.23684	9.7057	12.1322	9.69842e-07	5.98365e-05	RFC4
218362_s_at	-1.24589	6.80287	-12.1286	9.72212e-07	5.98423e-05	DIS3
210683_at	2.42591	4.66485	12.1256	9.74184e-07	5.98466e-05	NRTN
225269_s_at	-1.19512	8.30066	-12.123	9.75948e-07	5.98521e-05	RBMS1
225123_at	-2.45025	8.6179	-12.1222	9.76462e-07	5.98521e-05	SESN3
204768_s_at	2.28283	8.67071	12.1092	9.85156e-07	6.00025e-05	FEN1
230219_at	1.20295	6.55723	12.1086	9.85555e-07	6.00025e-05	NDE1
204257_at	-1.58847	8.03176	-12.1085	9.8558e-07	6.00025e-05	FADS3
222052_at	1.42868	7.88616	12.1079	9.86048e-07	6.00025e-05	C19orf54
224478_s_at	-1.64375	8.81294	-12.1064	9.87016e-07	6.00025e-05	C7orf50
222036_s_at	2.74163	9.1296	12.1054	9.87696e-07	6.00025e-05	MCM4
213322_at	1.14005	9.28604	12.1019	9.90049e-07	6.00787e-05	C6orf130
227811_at	-1.61829	8.46429	-12.0986	9.92286e-07	6.01477e-05	FGD3
219255_x_at	6.29624	7.80924	12.0815	1.00394e-06	6.07867e-05	IL17RB
227806_at	-2.16787	6.86169	-12.0652	1.01514e-06	6.1261e-05	C16orf74
212795_at	-1.08103	10.2644	-12.0563	1.02129e-06	6.14808e-05	KIAA1033
211796_s_at	-2.29277	9.28015	-12.0558	1.02165e-06	6.14808e-05	TRBC2
226012_at	-1.00303	8.69988	-12.0551	1.02215e-06	6.14808e-05	ANKRD11
218422_s_at	-1.20829	10.7535	-12.0533	1.02341e-06	6.14891e-05	RBM26
206643_at	-1.64576	4.34228	-12.0512	1.02491e-06	6.15117e-05	HAL
200762_at	2.67328	9.55729	12.0463	1.02832e-06	6.16086e-05	DPYSL2
225618_at	-1.03784	7.61073	-12.0429	1.03069e-06	6.16376e-05	ARHGAP27
205023_at	1.97944	4.56901	12.0418	1.03152e-06	6.16376e-05	RAD51
213015_at	-1.45853	8.54531	-12.0385	1.03383e-06	6.17079e-05	BBX
218292_s_at	-1.55627	6.19446	-12.0365	1.03526e-06	6.17261e-05	PRKAG2
218622_at	1.84433	9.64944	12.0257	1.04293e-06	6.21155e-05	NUP37
202309_at	2.184	9.89094	12.0195	1.04738e-06	6.22076e-05	MTHFD1
212279_at	2.15856	7.613	12.0173	1.04894e-06	6.22076e-05	TMEM97
202784_s_at	1.72977	7.86301	12.0172	1.04899e-06	6.22076e-05	NNT
213419_at	-2.52431	5.33116	-12.0172	1.04902e-06	6.22076e-05	APBB2
209677_at	1.63531	4.73224	12.0149	1.0507e-06	6.22397e-05	PRKCI
222446_s_at	-1.74982	5.63539	-12.0095	1.05459e-06	6.23349e-05	BACE2
210644_s_at	-1.69231	6.08442	-11.9958	1.06454e-06	6.2855e-05	LAIR1
211575_s_at	1.34258	7.93921	11.9942	1.06572e-06	6.28566e-05	UBE3A
203565_s_at	1.29977	7.53669	11.9882	1.0701e-06	6.299e-05	MNAT1
210868_s_at	2.1172	5.17093	11.9875	1.07062e-06	6.299e-05	ELOVL6
210517_s_at	3.52118	6.09604	11.9691	1.08425e-06	6.34723e-05	AKAP12
226080_at	-1.65708	8.76291	-11.9633	1.08854e-06	6.36534e-05	SSH2
222520_s_at	-2.24505	5.16722	-11.9525	1.09665e-06	6.4059e-05	IFT57
200723_s_at	1.27172	10.4653	11.9504	1.09825e-06	6.4084e-05	CAPRIN1
204767_s_at	2.41574	9.958	11.9449	1.10247e-06	6.42617e-05	FEN1
212321_at	-1.15454	7.57117	-11.9419	1.10473e-06	6.43247e-05	SGPL1
219854_at	-1.5231	7.5851	-11.933	1.11155e-06	6.46534e-05	ZNF14
208671_at	-1.56396	10.0842	-11.9305	1.11341e-06	6.46925e-05	SERINC1
222402_at	2.02277	7.18241	11.9267	1.11633e-06	6.47934e-05	POMP
202522_at	1.03933	9.84156	11.9109	1.12861e-06	6.54128e-05	PITPNB
228760_at	-1.65525	9.22641	-11.9092	1.12994e-06	6.54128e-05	SRSF8
242088_at	-1.85029	4.01327	-11.9007	1.13656e-06	6.56888e-05	KLHL24
213146_at	-1.81468	6.34994	-11.8912	1.1441e-06	6.60547e-05	KDM6B
239975_at	2.60026	5.65482	11.8887	1.14604e-06	6.60965e-05	HLA-DPB2
208942_s_at	-1.70097	10.5115	-11.8837	1.15003e-06	6.61164e-05	SEC62
227701_at	-1.23416	8.06928	-11.8833	1.15036e-06	6.61164e-05	C10orf118
201714_at	2.4236	8.20199	11.8822	1.15122e-06	6.61164e-05	TUBG1
212141_at	2.66044	8.52314	11.8789	1.15386e-06	6.61986e-05	MCM4
1552634_a_at	-1.84266	8.05795	-11.8754	1.15667e-06	6.62005e-05	ZNF101
224802_at	3.29818	7.3866	11.8743	1.15751e-06	6.62005e-05	NDFIP2
225417_at	-1.38693	9.01349	-11.8737	1.15802e-06	6.62005e-05	EPC1
231377_at	-2.39843	6.4931	-11.8728	1.15874e-06	6.62005e-05	CXorf65
200960_x_at	1.06974	10.7517	11.87	1.16096e-06	6.62357e-05	CLTA
202234_s_at	1.5811	6.68676	11.8657	1.16443e-06	6.63179e-05	SLC16A1
224512_s_at	1.58823	9.42763	11.8524	1.17527e-06	6.68028e-05	LSMD1
214106_s_at	1.38586	7.69135	11.852	1.17556e-06	6.68028e-05	GMDS
213324_at	1.40264	7.75733	11.848	1.17884e-06	6.68603e-05	SRC
212970_at	-2.02477	5.75601	-11.844	1.18212e-06	6.69075e-05	APBB2
227435_at	-2.14602	7.79704	-11.8382	1.18686e-06	6.71062e-05	KIAA2018
226909_at	-1.44404	7.97169	-11.8344	1.18997e-06	6.72127e-05	ZNF518B
213111_at	-1.2562	9.5155	-11.8189	1.20286e-06	6.7832e-05	PIKFYVE
1552633_at	-1.70092	7.56404	-11.8171	1.20444e-06	6.7832e-05	ZNF101
207966_s_at	-1.25319	8.41673	-11.8139	1.20708e-06	6.7832e-05	GLG1
212652_s_at	1.13312	9.23198	11.8092	1.21107e-06	6.7832e-05	SNX4
209513_s_at	1.60407	8.66346	11.8075	1.21249e-06	6.7832e-05	HSDL2
220942_x_at	2.15531	11.1824	11.8073	1.21269e-06	6.7832e-05	FAM162A
226349_at	1.45254	8.13794	11.8062	1.21359e-06	6.7832e-05	C12orf45
215305_at	1.55717	5.47004	11.8051	1.21452e-06	6.7832e-05	PDGFRA
214326_x_at	-1.60096	5.68468	-11.805	1.21459e-06	6.7832e-05	JUND
244461_at	1.86658	5.54615	11.8032	1.21613e-06	6.7849e-05	SPECC1
217967_s_at	2.63117	9.02686	11.7997	1.21909e-06	6.79387e-05	FAM129A
222151_s_at	1.06725	7.4197	11.7984	1.22023e-06	6.79387e-05	CEP63
230370_x_at	1.15091	8.22808	11.7965	1.22179e-06	6.79566e-05	STYXL1
238432_at	-1.95303	5.93822	-11.7836	1.23281e-06	6.83609e-05	DLGAP1-AS1
201013_s_at	1.86226	10.6451	11.774	1.24116e-06	6.8615e-05	PAICS
212594_at	-1.62659	9.01321	-11.7677	1.24657e-06	6.88448e-05	PDCD4
208988_at	-1.33733	9.33417	-11.7646	1.24926e-06	6.89238e-05	KDM2A
203411_s_at	2.88565	8.25603	11.762	1.25158e-06	6.89818e-05	LMNA
224345_x_at	2.20653	11.0217	11.7556	1.25715e-06	6.92193e-05	FAM162A
225249_at	-2.31702	6.4593	-11.7459	1.26573e-06	6.95513e-05	SPPL2B
201900_s_at	1.43555	10.5567	11.7325	1.27766e-06	7.01368e-05	AKR1A1
203139_at	3.59511	7.01905	11.7188	1.29e-06	7.05428e-05	DAPK1
224156_x_at	6.13368	7.99713	11.7176	1.29102e-06	7.05428e-05	IL17RB
236981_at	3.47911	6.73783	11.7175	1.29114e-06	7.05428e-05	C17orf99
244640_at	2.19189	6.43186	11.7171	1.29151e-06	7.05428e-05	ZNF850
228323_at	2.87461	8.01284	11.7136	1.29472e-06	7.0577e-05	CASC5
205685_at	2.6288	8.33572	11.7067	1.30092e-06	7.07464e-05	CD86
214426_x_at	1.63473	7.75942	11.7062	1.30144e-06	7.07464e-05	CHAF1A
227165_at	2.55053	6.10577	11.7059	1.30171e-06	7.07464e-05	SKA3
201193_at	1.35154	8.7006	11.7025	1.30478e-06	7.0843e-05	IDH1
208103_s_at	1.67809	9.36147	11.6994	1.3076e-06	7.09138e-05	ANP32E
201869_s_at	-1.48243	7.00016	-11.6983	1.30868e-06	7.09138e-05	TBL1X
222996_s_at	-1.72274	9.79962	-11.6922	1.31427e-06	7.10076e-05	CXXC5
210046_s_at	2.33109	9.17832	11.6922	1.31431e-06	7.10076e-05	IDH2
214181_x_at	2.7706	7.38371	11.6736	1.33152e-06	7.18668e-05	LST1
211152_s_at	1.19107	8.38779	11.6644	1.34016e-06	7.21146e-05	HTRA2
204270_at	-1.86431	5.39739	-11.6641	1.3405e-06	7.21146e-05	SKI
202830_s_at	1.60222	7.67632	11.6632	1.34133e-06	7.21146e-05	SLC37A4
229030_at	1.28702	4.26765	11.6631	1.34139e-06	7.21146e-05	CAPN8
222942_s_at	1.31768	6.68593	11.6603	1.34409e-06	7.21885e-05	TIAM2
225736_at	2.50484	7.82113	11.6556	1.34849e-06	7.23541e-05	FBXO22
204963_at	-2.7631	5.10477	-11.654	1.35003e-06	7.23654e-05	SSPN
218273_s_at	-1.79955	5.2106	-11.6525	1.35146e-06	7.23713e-05	PDP1
225858_s_at	-1.23604	8.61724	-11.6473	1.35647e-06	7.25686e-05	XIAP
218757_s_at	1.3417	9.39109	11.6447	1.35889e-06	7.26267e-05	UPF3B
232617_at	-2.14486	9.06602	-11.6349	1.36835e-06	7.30269e-05	CTSS
229088_at	1.33822	4.09263	11.6339	1.36933e-06	7.30269e-05	ENPP1
235475_at	2.34102	6.12056	11.6328	1.37038e-06	7.30269e-05	SERP1
221599_at	1.37214	7.48165	11.6282	1.37479e-06	7.31907e-05	C11orf67
200932_s_at	1.16589	9.6191	11.6179	1.38488e-06	7.35845e-05	DCTN2
227350_at	3.08032	9.04372	11.5974	1.40505e-06	7.45836e-05	HELLS
225300_at	2.28069	7.365	11.585	1.41749e-06	7.5098e-05	C15orf23
220172_at	1.65994	6.239	11.5786	1.42386e-06	7.53062e-05	DCAF17
200974_at	2.8735	7.2056	11.5783	1.42421e-06	7.53062e-05	ACTA2
202254_at	-2.33441	8.13828	-11.5716	1.43094e-06	7.53062e-05	SIPA1L1
218777_at	1.10014	7.9474	11.5704	1.43218e-06	7.53062e-05	REEP4
1555724_s_at	-1.39787	6.22924	-11.5702	1.43235e-06	7.53062e-05	TAGLN
235310_at	3.84588	6.99055	11.5689	1.43376e-06	7.53062e-05	GCSAM
211581_x_at	2.2363	7.23304	11.5634	1.43931e-06	7.55223e-05	LST1
209129_at	2.05025	7.57987	11.5605	1.44231e-06	7.5557e-05	TRIP6
230110_at	1.78028	9.37122	11.5587	1.44412e-06	7.5557e-05	MCOLN2
1553956_at	2.2233	6.41958	11.5373	1.46622e-06	7.65667e-05	TMEM237
203640_at	-2.09528	8.93763	-11.5255	1.47856e-06	7.68345e-05	MBNL2
212794_s_at	-1.47192	8.75635	-11.5246	1.47949e-06	7.68345e-05	KIAA1033
227146_at	-2.37185	8.90275	-11.5245	1.47965e-06	7.68345e-05	QSOX2
211071_s_at	2.06339	7.79749	11.5239	1.48025e-06	7.68345e-05	MLLT11
223135_s_at	-1.18298	8.30338	-11.5238	1.48034e-06	7.68345e-05	BBX
236487_at	1.82458	7.49028	11.5214	1.48293e-06	7.68522e-05	SCLT1
221787_at	-1.3464	7.96463	-11.5191	1.48532e-06	7.69035e-05	C6orf120
204156_at	-1.80979	7.19544	-11.5111	1.49379e-06	7.72371e-05	SIK3
228303_at	1.63488	6.7655	11.509	1.49601e-06	7.72371e-05	GALNT6
230997_at	-2.25087	6.56159	-11.5045	1.50086e-06	7.73104e-05	TTC21A
225798_at	-2.76449	6.89742	-11.4996	1.50605e-06	7.74632e-05	JAZF1
219840_s_at	-2.24454	4.9613	-11.4918	1.5145e-06	7.78245e-05	TCL6
221764_at	-1.22282	8.23287	-11.4875	1.51919e-06	7.79188e-05	R3HDM4
217867_x_at	-1.46791	6.03107	-11.485	1.52181e-06	7.79802e-05	BACE2
1557458_s_at	1.83786	5.57621	11.48	1.5273e-06	7.80658e-05	SHB
214170_x_at	1.8259	10.2421	11.4796	1.52776e-06	7.80658e-05	FH
242515_x_at	1.22218	8.25193	11.4767	1.53094e-06	7.81549e-05	AKIP1
207813_s_at	2.25795	7.41552	11.4706	1.53759e-06	7.83963e-05	FDXR
212765_at	2.1544	6.86124	11.4697	1.53853e-06	7.83963e-05	CAMSAP2
205571_at	-1.3728	7.52166	-11.468	1.54039e-06	7.8418e-05	LIPT1
226507_at	1.85176	8.23978	11.4621	1.54697e-06	7.86797e-05	PAK1
229256_at	-2.32707	5.417	-11.4556	1.55416e-06	7.89718e-05	PGM2L1
208943_s_at	-1.55515	10.1053	-11.4508	1.55946e-06	7.91675e-05	SEC62
217591_at	-2.7357	7.35054	-11.4471	1.56359e-06	7.92302e-05	SKIL
209216_at	-1.42643	8.27242	-11.438	1.5738e-06	7.95263e-05	WDR45
205997_at	-2.87926	7.37299	-11.432	1.58066e-06	7.97257e-05	ADAM28
1555689_at	2.76426	5.88886	11.4258	1.58772e-06	8.00079e-05	CD80
214177_s_at	-2.50843	8.82112	-11.4219	1.59214e-06	8.00736e-05	PBXIP1
223193_x_at	2.23684	11.0766	11.4211	1.59304e-06	8.00736e-05	FAM162A
209753_s_at	1.68176	7.20755	11.4195	1.59487e-06	8.00736e-05	TMPO
212906_at	1.67482	7.12159	11.4195	1.59488e-06	8.00736e-05	GRAMD1B
228005_at	-1.53347	7.40614	-11.4158	1.5991e-06	8.02117e-05	ZXDB
229431_at	1.85665	8.11166	11.4079	1.60815e-06	8.05177e-05	RFXAP
202177_at	2.56872	6.01047	11.4051	1.61145e-06	8.05411e-05	GAS6
1555278_a_at	1.50418	7.91131	11.405	1.61156e-06	8.05411e-05	CKAP5
214086_s_at	1.37384	8.27302	11.3981	1.61953e-06	8.08653e-05	PARP2
1554360_at	1.69081	6.20901	11.3948	1.6234e-06	8.09112e-05	FCHSD2
211576_s_at	1.58261	7.10914	11.3907	1.62823e-06	8.10195e-05	SLC19A1
218418_s_at	-2.23763	6.68782	-11.3902	1.62875e-06	8.10195e-05	KANK2
213400_s_at	-1.78766	8.83494	-11.3891	1.63002e-06	8.10195e-05	TBL1X
235425_at	2.45674	7.74321	11.3876	1.63179e-06	8.10337e-05	SGOL2
204396_s_at	-1.691	8.92982	-11.3855	1.63423e-06	8.1081e-05	GRK5
217731_s_at	-3.28734	9.61497	-11.3818	1.63858e-06	8.12234e-05	ITM2B
218084_x_at	-1.83679	8.91596	-11.3722	1.64994e-06	8.15648e-05	FXYD5
230185_at	-1.87811	6.20586	-11.3621	1.66198e-06	8.20856e-05	THAP9
216260_at	-1.84718	5.2195	-11.3597	1.66489e-06	8.21551e-05	DICER1
205362_s_at	1.2281	7.21343	11.3513	1.67495e-06	8.25027e-05	PFDN4
231579_s_at	-2.05293	5.82286	-11.3492	1.67756e-06	8.25567e-05	TIMP2
58780_s_at	2.146	4.92937	11.3468	1.68049e-06	8.26108e-05	ARHGEF40
208663_s_at	-1.45139	8.90395	-11.3458	1.68168e-06	8.26108e-05	TTC3
235150_at	-1.48551	4.43705	-11.3434	1.68461e-06	8.26807e-05	SESN3
209536_s_at	1.90165	10.0594	11.3292	1.70194e-06	8.33065e-05	EHD4
218557_at	1.61918	9.71108	11.3269	1.70478e-06	8.33708e-05	NIT2
200983_x_at	3.28827	9.55265	11.3246	1.70758e-06	8.33797e-05	CD59
211628_x_at	-1.30206	12.476	-11.3239	1.70849e-06	8.33797e-05	FTH1P5
238508_at	1.47858	5.99744	11.323	1.70953e-06	8.33797e-05	DBF4B
1555501_s_at	1.45695	7.15458	11.3217	1.71121e-06	8.3387e-05	RSRC1
202785_at	1.3289	9.36459	11.3141	1.72055e-06	8.3693e-05	NDUFA7
204702_s_at	2.51555	6.3485	11.3127	1.72232e-06	8.37047e-05	NFE2L3
205416_s_at	1.18674	5.896	11.3099	1.72582e-06	8.37996e-05	ATXN3
203574_at	4.28129	8.46923	11.3077	1.72853e-06	8.37996e-05	NFIL3
1555779_a_at	-1.61745	8.78284	-11.3075	1.72887e-06	8.37996e-05	CD79A
225937_at	-1.61748	4.90249	-11.2992	1.73928e-06	8.41548e-05	CUX1
218007_s_at	1.83018	11.6479	11.2888	1.75235e-06	8.46378e-05	RPS27L
226301_at	-2.11328	8.27806	-11.2861	1.75583e-06	8.47308e-05	SLC18B1
223552_at	1.34431	5.85741	11.2845	1.75785e-06	8.47536e-05	LRRC4
202574_s_at	-1.34226	7.9938	-11.2814	1.76186e-06	8.48129e-05	CSNK1G2
203235_at	1.56762	7.59124	11.2811	1.76218e-06	8.48129e-05	THOP1
203022_at	2.40918	8.32766	11.2771	1.76729e-06	8.49836e-05	RNASEH2A
226274_at	1.79121	6.57251	11.2738	1.7716e-06	8.51163e-05	CLCN5
208511_at	1.84785	5.25181	11.2692	1.77752e-06	8.53256e-05	PTTG3P
226936_at	3.39154	8.75547	11.2651	1.78278e-06	8.54779e-05	CENPW
229268_at	1.99563	8.05405	11.2643	1.78382e-06	8.54779e-05	FAM105B
212413_at	-1.07702	8.3945	-11.2627	1.78592e-06	8.55038e-05	2013-09-06
203313_s_at	-3.79214	6.89675	-11.2602	1.78915e-06	8.5515e-05	TGIF1
1555766_a_at	1.02105	4.721	11.2601	1.78928e-06	8.5515e-05	GNG2
200862_at	1.90969	8.25937	11.2543	1.79682e-06	8.58003e-05	DHCR24
220954_s_at	-1.28726	7.9503	-11.2494	1.80325e-06	8.6032e-05	PILRB
203594_at	1.72021	9.48286	11.2463	1.80732e-06	8.61509e-05	RTCA
209267_s_at	2.34525	9.68285	11.2411	1.81418e-06	8.63957e-05	SLC39A8
225853_at	1.39521	8.45436	11.24	1.81561e-06	8.63957e-05	GNPNAT1
210172_at	-2.3521	5.6312	-11.2311	1.82741e-06	8.68063e-05	SF1
209374_s_at	-1.66979	12.3261	-11.2311	1.82742e-06	8.68063e-05	IGHM
1554086_at	1.83982	5.7926	11.2297	1.82928e-06	8.68192e-05	TUBGCP3
224285_at	2.14489	4.67618	11.2224	1.83894e-06	8.71267e-05	GPR174
1552680_a_at	2.75659	6.41926	11.2166	1.84674e-06	8.73281e-05	CASC5
223114_at	1.24893	9.00554	11.2161	1.84742e-06	8.73281e-05	COQ5
223314_at	-1.2581	6.97843	-11.2133	1.85117e-06	8.74032e-05	TSPAN14
208630_at	1.53836	9.82276	11.2111	1.85422e-06	8.74717e-05	HADHA
218997_at	1.14466	8.39453	11.2081	1.85823e-06	8.75851e-05	POLR1E
229356_x_at	-1.18359	8.76045	-11.1994	1.87003e-06	8.79701e-05	INO80
230362_at	1.67379	5.72014	11.1789	1.89822e-06	8.91625e-05	INPP5F
203066_at	-2.72947	7.30046	-11.1776	1.90012e-06	8.9175e-05	CHST15
218195_at	1.676	9.42309	11.1618	1.92215e-06	9.01316e-05	C6orf211
207176_s_at	2.91184	7.59146	11.1564	1.92973e-06	9.04094e-05	CD80
201695_s_at	2.49924	8.96584	11.128	1.97037e-06	9.19516e-05	PNP
214786_at	-2.00574	5.62667	-11.124	1.97614e-06	9.19516e-05	MAP3K1
226106_at	-1.28932	9.26752	-11.1223	1.97856e-06	9.19516e-05	RNF141
226431_at	-1.61784	8.59861	-11.1216	1.9797e-06	9.19516e-05	FAM117B
225578_at	1.21138	9.37121	11.1214	1.97996e-06	9.19516e-05	MZT1
225445_at	-1.26604	6.91288	-11.1208	1.98081e-06	9.19516e-05	UBN2
209685_s_at	-1.84915	10.8367	-11.1207	1.98099e-06	9.19516e-05	PRKCB
203318_s_at	-1.16305	8.44014	-11.1203	1.98159e-06	9.19516e-05	ZNF148
225051_at	-1.1133	9.78667	-11.1199	1.98208e-06	9.19516e-05	EPB41
210983_s_at	1.55816	9.12968	11.1194	1.98282e-06	9.19516e-05	MCM7
208591_s_at	-1.72408	5.61609	-11.114	1.99069e-06	9.22381e-05	PDE3B
228087_at	3.0963	8.01685	11.1119	1.99374e-06	9.2301e-05	CCDC126
225737_s_at	2.30632	6.93066	11.1058	2.00273e-06	9.26391e-05	FBXO22
201301_s_at	1.15298	9.24852	11.1025	2.0076e-06	9.27073e-05	ANXA4
232008_s_at	-1.19485	8.28651	-11.099	2.01284e-06	9.27208e-05	BBX
213049_at	-1.36516	8.78782	-11.0957	2.01765e-06	9.28314e-05	RALGAPA1
209901_x_at	2.20137	7.19774	11.095	2.01877e-06	9.28314e-05	AIF1
235384_at	1.04643	9.2511	11.0917	2.02358e-06	9.29014e-05	NUDT19
212372_at	3.41714	7.63094	11.0908	2.0249e-06	9.29014e-05	MYH10
226402_at	-2.44079	6.05951	-11.0899	2.02625e-06	9.29014e-05	CYP2U1
202573_at	-1.18843	9.99618	-11.0894	2.02709e-06	9.29014e-05	CSNK1G2
212832_s_at	1.41441	8.79406	11.0868	2.03089e-06	9.29976e-05	CKAP5
219094_at	-1.80696	6.87743	-11.0625	2.06759e-06	9.44407e-05	ARMC8
232931_at	-1.80649	8.30736	-11.0601	2.07122e-06	9.45273e-05	SNRNP200
203097_s_at	-2.81104	8.86292	-11.0412	2.10039e-06	9.54602e-05	RAPGEF2
205282_at	2.48205	6.91244	11.0316	2.11527e-06	9.59054e-05	LRP8
228831_s_at	-1.69903	8.54718	-11.0315	2.11544e-06	9.59054e-05	GNG7
222613_at	1.85669	7.57789	11.0259	2.12434e-06	9.61404e-05	C12orf4
221504_s_at	1.00759	8.94963	11.0249	2.1259e-06	9.61404e-05	ATP6V1H
230060_at	2.13337	5.06207	11.0224	2.12983e-06	9.61602e-05	CDCA7
211833_s_at	1.40312	9.39613	11.0224	2.12986e-06	9.61602e-05	BAX
1555037_a_at	1.32217	8.69801	11.0161	2.13971e-06	9.64457e-05	IDH1
227542_at	1.84886	5.24009	11.0115	2.14709e-06	9.66192e-05	SOCS6
204780_s_at	3.26795	9.03093	11.0101	2.14922e-06	9.66352e-05	FAS
225434_at	-1.07479	8.49031	-11.0067	2.15468e-06	9.68012e-05	DEDD2
228989_at	1.72947	5.27654	11.0022	2.16187e-06	9.70444e-05	C18orf56
213017_at	1.10195	9.14812	10.991	2.17987e-06	9.7692e-05	ABHD3
209264_s_at	2.30712	5.65485	10.9879	2.18492e-06	9.78104e-05	TSPAN4
212836_at	1.67789	8.63527	10.9872	2.18609e-06	9.78104e-05	POLD3
203829_at	1.14105	7.94284	10.986	2.18807e-06	9.78191e-05	ELP4
1554519_at	3.03828	7.83253	10.9729	2.20937e-06	9.85296e-05	CD80
201620_at	-1.20491	8.35013	-10.9676	2.21811e-06	9.88387e-05	MBTPS1
204119_s_at	1.47548	9.81079	10.9633	2.22523e-06	9.89948e-05	ADK
217398_x_at	1.41997	12.7813	10.9595	2.23145e-06	9.91102e-05	GAPDH
228377_at	-3.32911	7.77513	-10.9583	2.23356e-06	9.91235e-05	KLHL14
228253_at	2.71203	6.60669	10.9551	2.23874e-06	9.91388e-05	LOXL3
204221_x_at	-2.58261	7.39732	-10.9548	2.23935e-06	9.91388e-05	GLIPR1
220171_x_at	1.93384	7.18885	10.951	2.24569e-06	9.92331e-05	KIAA1704
219049_at	-3.67729	6.07318	-10.9503	2.24686e-06	9.92331e-05	CSGALNACT1
218854_at	1.30599	9.47937	10.9472	2.25209e-06	9.93007e-05	DSE
202783_at	1.98426	8.84453	10.9454	2.25498e-06	9.93482e-05	NNT
208838_at	1.39768	9.21569	10.9356	2.27154e-06	9.98365e-05	CAND1
202289_s_at	2.34625	4.51908	10.9245	2.29048e-06	0.000100588	TACC2
203089_s_at	1.36161	9.29657	10.9182	2.30118e-06	0.000100977	HTRA2
218964_at	1.02164	7.98418	10.9069	2.32077e-06	0.00010167	ARID3B
222740_at	2.37422	8.4178	10.9053	2.32352e-06	0.00010167	ATAD2
227053_at	1.66641	5.42387	10.8993	2.33394e-06	0.000102005	PACSIN1
1559065_a_at	2.85384	5.15841	10.8962	2.33926e-06	0.000102156	CLEC4G
244008_at	-2.56669	6.87329	-10.8902	2.3499e-06	0.000102457	PARP8
219008_at	1.50699	7.33946	10.888	2.35378e-06	0.000102495	C2orf43
215100_at	2.12104	6.6285	10.8867	2.35593e-06	0.000102495	ADTRP
202447_at	1.14185	9.49227	10.8865	2.3564e-06	0.000102495	DECR1
210449_x_at	1.7013	6.62264	10.8842	2.36033e-06	0.000102584	MAPK14
224252_s_at	-1.82264	8.71988	-10.8763	2.37449e-06	0.000102973	FXYD5
215499_at	-1.00476	8.79642	-10.876	2.37492e-06	0.000102973	MAP2K3
223493_at	1.22499	7.83711	10.8661	2.39262e-06	0.000103576	FBXO4
224361_s_at	5.46235	7.87671	10.8612	2.40141e-06	0.00010371	IL17RB
225238_at	-1.81608	6.27643	-10.8595	2.40453e-06	0.000103763	MSI2
201367_s_at	-1.85555	4.68202	-10.8552	2.41229e-06	0.000103944	ZFP36L2
209572_s_at	1.75667	10.5539	10.8546	2.41331e-06	0.000103944	EED
1558028_x_at	-2.30665	6.30738	-10.8501	2.42143e-06	0.000104163	LINC00657
212259_s_at	-2.2554	7.69796	-10.8461	2.42872e-06	0.000104395	PBXIP1
219501_at	1.90906	5.17991	10.8446	2.43155e-06	0.000104435	ENOX1
212735_at	-1.93583	8.452	-10.8405	2.43892e-06	0.000104669	KIAA0226
228789_at	-1.86228	6.23642	-10.8348	2.4495e-06	0.000104978	MTMR6
214369_s_at	-3.62229	7.24331	-10.8345	2.44997e-06	0.000104978	RASGRP2
215058_at	-2.45564	6.89243	-10.8294	2.45945e-06	0.000105178	DENND5B
229954_at	4.77456	6.91082	10.8258	2.46617e-06	0.000105178	CHDH
236957_at	2.00507	6.0369	10.8196	2.47752e-06	0.000105535	CDCA2
203708_at	-3.59441	9.41405	-10.8127	2.49049e-06	0.000105967	PDE4B
209301_at	2.85102	7.37033	10.8085	2.49841e-06	0.000106221	CA2
201664_at	1.56627	10.5568	10.8002	2.51397e-06	0.0001068	SMC4
226611_s_at	1.93938	8.63306	10.7976	2.51894e-06	0.000106928	CENPV
212698_s_at	3.32342	6.20294	10.7935	2.52674e-06	0.000107176	2013-09-10
228810_at	-1.99013	5.84644	-10.7887	2.53593e-06	0.000107482	CCNYL1
225704_at	-1.82066	8.16418	-10.7858	2.54149e-06	0.000107635	FBRSL1
228075_x_at	1.5281	8.27049	10.7824	2.54805e-06	0.000107829	TFB1M
214085_x_at	-2.42118	8.63484	-10.7778	2.55679e-06	0.000108102	GLIPR1
244699_at	-2.16265	5.25861	-10.777	2.55846e-06	0.000108102	AHI1
203206_at	-2.21748	8.03541	-10.773	2.56606e-06	0.000108261	FAM53B
213295_at	-1.53784	8.77915	-10.7724	2.56724e-06	0.000108261	CYLD
213241_at	1.77436	8.85341	10.7719	2.56818e-06	0.000108261	PLXNC1
227211_at	2.39637	8.03615	10.7676	2.57661e-06	0.000108533	PHF19
205406_s_at	2.65159	6.10063	10.7654	2.58092e-06	0.000108631	SPA17
218263_s_at	-1.30129	10.3806	-10.7625	2.58653e-06	0.000108673	ZBED5
220917_s_at	-1.74507	8.02933	-10.7611	2.58928e-06	0.000108673	WDR19
213093_at	4.22486	6.06141	10.7601	2.59126e-06	0.000108673	PRKCA
208393_s_at	1.72034	8.58511	10.7572	2.59699e-06	0.000108722	RAD50
205633_s_at	1.68784	8.50157	10.7476	2.61592e-06	0.000109347	ALAS1
228132_at	-1.55475	5.9307	-10.7428	2.62548e-06	0.000109623	ABLIM2
207568_at	2.57594	6.39368	10.7412	2.62853e-06	0.000109623	CHRNA6
228370_at	-1.67525	7.83756	-10.7412	2.62855e-06	0.000109623	SNHG14
209608_s_at	1.45279	9.57562	10.74	2.63096e-06	0.00010964	ACAT2
225907_at	-1.44197	5.93526	-10.7378	2.63527e-06	0.000109679	ZNF775
200942_s_at	1.65464	9.41626	10.7375	2.63591e-06	0.000109679	HSBP1
218765_at	-1.49881	8.36248	-10.7337	2.64355e-06	0.000109795	SIDT2
228569_at	-1.11681	8.99452	-10.7315	2.64798e-06	0.000109831	PAPOLA
204491_at	-2.61908	6.44497	-10.7279	2.65507e-06	0.000109831	PDE4D
200643_at	1.2969	8.04006	10.7278	2.65539e-06	0.000109831	HDLBP
205510_s_at	-2.09593	6.96686	-10.7277	2.65562e-06	0.000109831	GABPB1
226912_at	-2.2694	7.01831	-10.7265	2.65801e-06	0.000109846	ZDHHC23
208623_s_at	-1.12535	11.5064	-10.7216	2.66793e-06	0.000110153	EZR
201697_s_at	1.48735	10.3052	10.7144	2.68249e-06	0.000110524	DNMT1
226796_at	-1.72267	7.07004	-10.7125	2.6864e-06	0.000110601	ABHD15
204686_at	-2.22877	6.14793	-10.7079	2.69577e-06	0.000110904	IRS1
238552_at	-1.2776	4.32277	-10.7056	2.70045e-06	0.000111013	MLL5
200992_at	1.45285	9.68377	10.7016	2.7087e-06	0.000111195	IPO7
212221_x_at	-1.52115	10.3641	-10.7002	2.71163e-06	0.000111195	IDS
213520_at	1.49378	7.10471	10.6942	2.72397e-06	0.00011156	RECQL4
212313_at	-1.65019	8.79396	-10.6903	2.73207e-06	0.000111709	CHMP7
1562020_s_at	1.56147	4.41779	10.6896	2.73342e-06	0.000111709	NT5DC4
230489_at	-1.66309	5.78228	-10.6895	2.73374e-06	0.000111709	CD5
229147_at	-3.57279	6.46995	-10.6851	2.7429e-06	0.000111916	RASSF6
222893_s_at	1.57107	7.6728	10.6841	2.74503e-06	0.00011192	RPAP2
214264_s_at	1.94626	7.67127	10.668	2.77882e-06	0.000113213	EFCAB11
204050_s_at	1.05248	10.3604	10.651	2.81497e-06	0.000114515	CLTA
206205_at	2.14886	7.34206	10.6364	2.84648e-06	0.000115711	MPHOSPH9
203959_s_at	-1.21749	8.12218	-10.6354	2.84873e-06	0.000115716	ZBTB40
50400_at	1.55263	7.30419	10.6316	2.857e-06	0.000115966	PAOX
1552542_s_at	-1.90764	6.40584	-10.6293	2.86195e-06	0.000116081	TAGAP
211725_s_at	2.45734	9.3247	10.6174	2.88822e-06	0.000116725	BID
37966_at	1.92696	7.75156	10.6167	2.88967e-06	0.000116725	PARVB
201032_at	-1.8254	9.16777	-10.6166	2.88984e-06	0.000116725	BLCAP
228736_at	-1.0212	7.59217	-10.6163	2.89063e-06	0.000116725	HELQ
219311_at	1.11996	7.23175	10.6115	2.90121e-06	0.000117065	CEP76
235255_at	1.59155	5.60175	10.6099	2.90472e-06	0.000117121	ATP6V0A2
220302_at	2.5513	5.09618	10.6056	2.91434e-06	0.000117393	MAK
210629_x_at	1.65655	6.7693	10.6049	2.91577e-06	0.000117393	LST1
226423_at	2.10915	7.50541	10.5904	2.94845e-06	0.000118349	PAQR8
212196_at	-2.39425	6.70512	-10.5894	2.95066e-06	0.000118349	IL6ST
227904_at	1.78629	6.45591	10.5894	2.95079e-06	0.000118349	AZI2
226456_at	2.6868	8.65199	10.5889	2.95187e-06	0.000118349	RMI2
210582_s_at	1.14558	7.29414	10.5883	2.95309e-06	0.000118349	LIMK2
222126_at	1.48	6.91774	10.5876	2.95466e-06	0.000118349	AGFG2
204629_at	1.49983	7.19585	10.5831	2.96508e-06	0.000118679	PARVB
1554704_at	1.27323	4.39953	10.5802	2.97158e-06	0.000118852	ATP8B3
211708_s_at	1.10351	6.0331	10.5748	2.98381e-06	0.000119254	SCD
219352_at	-2.06264	6.37479	-10.5702	2.99446e-06	0.000119534	HERC6
212430_at	-2.22128	8.93535	-10.5684	2.99857e-06	0.000119582	RBM38
227530_at	2.13746	5.53382	10.5672	3.00146e-06	0.00011961	AKAP12
202794_at	1.11979	7.76139	10.5657	3.0048e-06	0.00011962	INPP1
205474_at	-1.1738	10.3223	-10.5652	3.00608e-06	0.00011962	CRLF3
214268_s_at	1.09779	9.78722	10.5637	3.00937e-06	0.000119663	MTMR4
209635_at	1.12676	7.65307	10.562	3.0133e-06	0.00011967	AP1S1
227442_at	1.38628	8.8013	10.5618	3.01391e-06	0.00011967	COX18
227489_at	-1.63535	7.04817	-10.5575	3.02373e-06	0.000119922	SMURF2
202455_at	-1.36912	7.5311	-10.5554	3.02876e-06	0.000119922	HDAC5
208700_s_at	1.57818	10.3182	10.5553	3.02903e-06	0.000119922	TKT
226297_at	-1.09976	10.7301	-10.5529	3.03442e-06	0.000120048	HIPK3
240106_at	-1.89921	5.65432	-10.5465	3.04947e-06	0.000120302	GNPTAB
225113_at	1.4213	7.15779	10.5465	3.04959e-06	0.000120302	AGPS
205176_s_at	1.59909	9.50218	10.5453	3.05228e-06	0.000120302	ITGB3BP
200794_x_at	-1.58912	11.2947	-10.5391	3.06699e-06	0.000120375	DAZAP2
203401_at	1.02414	9.71957	10.5389	3.06731e-06	0.000120375	PRPS2
219359_at	-1.94898	7.24539	-10.5389	3.06734e-06	0.000120375	ATHL1
234969_s_at	-1.77746	10.0765	-10.5376	3.0704e-06	0.000120375	EPC1
208664_s_at	-1.16595	6.56833	-10.5262	3.0976e-06	0.000121059	TTC3
216835_s_at	1.14702	7.75714	10.5238	3.10314e-06	0.000121189	DOK1
224609_at	-1.56013	7.76747	-10.5196	3.11332e-06	0.0001215	SLC44A2
210341_at	-1.66625	5.05639	-10.5146	3.12536e-06	0.000121795	MYT1
208925_at	1.49768	8.81828	10.5012	3.15781e-06	0.000122885	CLDND1
218017_s_at	-2.15128	8.35146	-10.496	3.17052e-06	0.000123292	HGSNAT
221602_s_at	-1.97866	7.31719	-10.4923	3.17944e-06	0.000123551	FAIM3
208078_s_at	-1.86299	8.55715	-10.4877	3.19088e-06	0.000123871	SIK1
201727_s_at	1.12602	8.64413	10.486	3.19508e-06	0.000123894	ELAVL1
218733_at	-1.20824	9.33178	-10.485	3.19765e-06	0.000123906	MSL2
201135_at	1.01507	9.64683	10.4801	3.20962e-06	0.000124282	ECHS1
202034_x_at	-1.18576	8.61519	-10.4786	3.21343e-06	0.000124341	RB1CC1
205745_x_at	-1.68121	7.6939	-10.4755	3.22105e-06	0.000124519	ADAM17
208703_s_at	-1.87775	7.73742	-10.4749	3.22257e-06	0.000124519	APLP2
221596_s_at	-1.09185	8.09017	-10.473	3.22744e-06	0.000124619	RBM48
1554894_a_at	1.27175	6.538	10.4622	3.25434e-06	0.000125193	PCBD2
226547_at	-1.44869	9.11648	-10.4572	3.26712e-06	0.000125391	KAT6A
211919_s_at	-2.94628	10.1454	-10.4568	3.26808e-06	0.000125391	CXCR4
1569190_at	2.82363	6.28981	10.4498	3.28591e-06	0.000125889	SCLT1
203758_at	-1.74812	7.4851	-10.4489	3.28819e-06	0.000125889	CTSO
201613_s_at	-1.1144	7.95479	-10.4481	3.29028e-06	0.000125889	AP1G2
1555905_a_at	1.98479	5.92075	10.4455	3.29679e-06	0.00012605	TCAIM
200853_at	1.54357	11.7469	10.4379	3.31625e-06	0.000126529	H2AFZ
210127_at	1.48072	4.94064	10.4364	3.32007e-06	0.000126586	RAB6B
227166_at	2.00506	7.10742	10.4269	3.34483e-06	0.000127353	DNAJC18
211337_s_at	1.46579	7.25316	10.4258	3.34759e-06	0.000127369	TUBGCP4
228551_at	-2.42956	7.99777	-10.4239	3.35251e-06	0.000127468	DENND5B
231567_s_at	-1.75884	5.17769	-10.4194	3.36434e-06	0.00012774	CCDC62
37226_at	1.31471	6.95638	10.4185	3.36673e-06	0.000127742	BNIP1
225082_at	1.62776	9.64116	10.4111	3.38609e-06	0.000128387	CPSF3
223303_at	1.08643	8.73044	10.409	3.39175e-06	0.000128513	FERMT3
223759_s_at	2.34441	6.28034	10.4022	3.40953e-06	0.000128933	GSG2
219441_s_at	1.9112	7.57366	10.4021	3.4099e-06	0.000128933	LRRK1
201369_s_at	-3.05547	7.78341	-10.4	3.41544e-06	0.000128978	ZFP36L2
1555964_at	1.41594	5.70839	10.3984	3.41977e-06	0.000128978	ARL17A
235603_at	-1.97517	6.08363	-10.3981	3.42053e-06	0.000128978	HNRNPU
201005_at	-4.45852	7.9566	-10.3908	3.43991e-06	0.000129619	CD9
232865_at	-2.58954	6.90095	-10.3841	3.45795e-06	0.000130119	AFF4
201236_s_at	-2.8284	9.86083	-10.3824	3.46274e-06	0.00013021	BTG2
203406_at	1.23431	9.33472	10.3805	3.46774e-06	0.000130308	MFAP1
1553220_at	-1.53168	6.12089	-10.3761	3.47969e-06	0.000130488	FAM117B
202930_s_at	1.72847	8.86161	10.3741	3.48511e-06	0.000130602	SUCLA2
232864_s_at	-1.97687	5.50906	-10.372	3.49078e-06	0.000130635	AFF4
212561_at	1.63625	9.43533	10.3678	3.5022e-06	0.000130766	DENND5A
224847_at	1.91532	9.50571	10.3672	3.50385e-06	0.000130766	CDK6
232201_at	1.49534	5.96705	10.3669	3.50486e-06	0.000130766	NKD2
203137_at	-1.39133	9.97342	-10.366	3.50729e-06	0.000130766	WTAP
226128_at	-1.31267	9.15011	-10.3655	3.50861e-06	0.000130766	BROX
203509_at	-2.34942	9.64288	-10.3627	3.51615e-06	0.000130958	SORL1
226441_at	-2.11567	7.55796	-10.3597	3.52447e-06	0.000131178	MAP3K2
204033_at	2.48856	7.56921	10.354	3.54033e-06	0.000131679	TRIP13
226642_s_at	1.44151	9.48048	10.3523	3.54478e-06	0.000131755	NUDCD2
242807_at	1.03368	6.68066	10.3512	3.54783e-06	0.000131778	FSD1L
222503_s_at	1.41636	8.91646	10.3488	3.55463e-06	0.000131941	WDR41
235199_at	1.17039	8.37283	10.3467	3.5606e-06	0.000132073	RNF125
1555626_a_at	2.6981	7.57843	10.3449	3.56545e-06	0.000132163	SLAMF1
228283_at	1.68516	8.9399	10.3435	3.56928e-06	0.000132216	CMC1
209201_x_at	-2.93297	10.2602	-10.3398	3.57985e-06	0.000132477	CXCR4
1564010_at	-1.59013	4.54856	-10.3393	3.58117e-06	0.000132477	CAST
227756_at	1.35594	5.91617	10.3377	3.58551e-06	0.000132547	FAM81A
212560_at	-2.34538	10.4029	-10.3363	3.58957e-06	0.00013257	SORL1
219192_at	1.01811	9.1436	10.3358	3.59098e-06	0.00013257	UBAP2
214681_at	1.41643	6.82739	10.3306	3.60563e-06	0.000133021	GK
1554966_a_at	1.55574	5.40693	10.3228	3.62758e-06	0.000133651	FILIP1L
204448_s_at	1.12288	7.04541	10.3194	3.63749e-06	0.000133836	PDCL
208923_at	1.49712	8.40117	10.3171	3.64402e-06	0.000133986	CYFIP1
1555906_s_at	1.81778	7.38595	10.3154	3.64873e-06	0.00013406	TCAIM
209980_s_at	1.43833	7.01862	10.3114	3.66032e-06	0.000134251	SHMT1
204240_s_at	2.64968	8.24288	10.3111	3.66106e-06	0.000134251	SMC2
209277_at	5.71379	6.72398	10.3048	3.67922e-06	0.000134736	TFPI2
226118_at	1.49197	6.87668	10.2993	3.69506e-06	0.000135135	CENPO
204127_at	2.02263	8.97519	10.2937	3.71133e-06	0.00013564	RFC3
228281_at	1.65266	6.99604	10.2818	3.74625e-06	0.000136825	C11orf82
200953_s_at	2.28634	11.0023	10.2775	3.75887e-06	0.000137108	CCND2
223681_s_at	-1.1526	6.31779	-10.2775	3.75902e-06	0.000137108	INADL
234107_s_at	1.16796	9.64771	10.2739	3.76952e-06	0.000137354	DTD1
213042_s_at	-1.50166	5.42073	-10.2702	3.78053e-06	0.000137525	ATP2A3
213113_s_at	2.20159	9.05724	10.2653	3.79513e-06	0.000137965	SLC43A3
206241_at	-1.53821	5.45193	-10.2565	3.82174e-06	0.000138558	KPNA5
1553425_at	2.75641	4.78786	10.2555	3.82479e-06	0.000138558	WDR65
218111_s_at	1.43216	8.00457	10.2542	3.82869e-06	0.000138558	CMAS
226026_at	-2.0472	6.46746	-10.2537	3.83015e-06	0.000138558	DIRC2
222146_s_at	-1.72729	9.28844	-10.2527	3.83309e-06	0.000138558	TCF4
1557064_s_at	-2.08396	5.99448	-10.2525	3.83376e-06	0.000138558	HGSNAT
201867_s_at	-1.85086	6.31757	-10.2523	3.83427e-06	0.000138558	TBL1X
209000_s_at	1.63392	6.26561	10.2472	3.84978e-06	0.000138843	2013-09-08
209102_s_at	-2.2778	8.84321	-10.2432	3.86201e-06	0.000139193	HBP1
202179_at	1.45233	8.46464	10.2375	3.87929e-06	0.00013954	BLMH
229074_at	2.25346	8.20451	10.2286	3.90653e-06	0.000140335	EHD4
201030_x_at	1.46005	12.1659	10.2224	3.92599e-06	0.000140941	LDHB
201619_at	2.43795	10.7724	10.2085	3.96921e-06	0.000142163	PRDX3
221918_at	-1.2355	9.8549	-10.2081	3.97042e-06	0.000142163	CDK17
208636_at	1.71471	6.49466	10.2042	3.98264e-06	0.000142507	ACTN1
201637_s_at	1.34581	10.8367	10.1988	3.9998e-06	0.000142934	FXR1
208647_at	1.06284	11.4478	10.1973	4.00455e-06	0.00014301	FDFT1
224516_s_at	-1.38385	10.2944	-10.1921	4.02107e-06	0.000143346	CXXC5
218996_at	1.00363	7.57569	10.1817	4.05445e-06	0.000144295	TFPT
200622_x_at	2.33907	9.44023	10.181	4.05649e-06	0.000144295	CALM3
200615_s_at	1.93345	7.91215	10.1735	4.08069e-06	0.000144972	AP2B1
218766_s_at	1.26346	7.07632	10.1722	4.08508e-06	0.000145034	WARS2
228184_at	-1.29348	5.29777	-10.1635	4.11336e-06	0.000145943	DISP1
209053_s_at	1.61348	8.51205	10.1584	4.13007e-06	0.000146387	WHSC1
214211_at	-2.1092	9.03595	-10.158	4.13124e-06	0.000146387	FTH1
201635_s_at	1.0964	8.53255	10.1558	4.13845e-06	0.000146413	FXR1
227143_s_at	2.05759	8.37786	10.1557	4.13893e-06	0.000146413	BID
203823_at	2.0874	7.60544	10.1533	4.14668e-06	0.00014646	RGS3
212098_at	-1.59677	9.84027	-10.1512	4.15364e-06	0.000146611	MGAT5
205511_at	-2.44092	6.02152	-10.1493	4.16003e-06	0.000146675	GABPB1
222604_at	1.30682	7.54135	10.149	4.16084e-06	0.000146675	GTF3C3
52285_f_at	1.33051	7.43545	10.1462	4.17039e-06	0.000146918	CEP76
210108_at	3.46599	4.94127	10.1425	4.18264e-06	0.000147254	CACNA1D
221624_at	-1.15936	5.43841	-10.1397	4.19181e-06	0.000147482	TCL6
233255_s_at	2.08348	6.72719	10.1367	4.20192e-06	0.000147743	BIVM
201555_at	1.97166	9.92934	10.1314	4.21977e-06	0.000148174	MCM3
227900_at	-2.93205	6.5987	-10.1306	4.22233e-06	0.000148174	CBLB
218092_s_at	1.1669	9.32279	10.1297	4.22549e-06	0.00014819	AGFG1
1563638_at	2.2485	5.40027	10.1286	4.22902e-06	0.000148219	FAM18A
224460_s_at	1.77708	5.95027	10.1215	4.25321e-06	0.000148948	L2HGDH
237032_x_at	-1.60385	4.79513	-10.1209	4.25527e-06	0.000148948	SIPA1L1
202690_s_at	1.47678	10.9011	10.1174	4.26699e-06	0.000149149	SNRPD1
1555618_s_at	1.30533	7.8464	10.1165	4.27003e-06	0.000149149	SAE1
218215_s_at	-1.20221	6.58364	-10.116	4.27191e-06	0.000149149	NR1H2
214334_x_at	-1.22226	10.8597	-10.113	4.282e-06	0.00014931	DAZAP2
203753_at	-1.6074	10.3909	-10.1045	4.31102e-06	0.000150131	TCF4
227371_at	1.94417	5.8352	10.1022	4.31891e-06	0.000150232	BAIAP2L1
218890_x_at	1.17654	9.04815	10.1011	4.32283e-06	0.000150232	MRPL35
219203_at	1.47017	7.83887	10.0994	4.32864e-06	0.000150232	EMC9
232238_at	2.5819	5.31612	10.0994	4.32876e-06	0.000150232	ASPM
235588_at	2.38281	5.7196	10.0991	4.3299e-06	0.000150232	ESCO2
222651_s_at	-1.55993	6.51347	-10.0978	4.33408e-06	0.000150232	TRPS1
213011_s_at	1.48755	11.5205	10.0973	4.33591e-06	0.000150232	TPI1
208184_s_at	-1.13462	7.81714	-10.0917	4.35557e-06	0.000150722	TRAPPC10
217946_s_at	1.21011	9.42976	10.0878	4.36899e-06	0.000151018	SAE1
231864_at	-1.24193	8.73564	-10.0876	4.36963e-06	0.000151018	ZNF33A
227522_at	2.10967	6.34625	10.0859	4.37557e-06	0.000151127	CMBL
209052_s_at	1.30856	6.25276	10.0833	4.38463e-06	0.000151196	WHSC1
224851_at	1.78733	8.13933	10.083	4.38586e-06	0.000151196	CDK6
227095_at	-1.79737	7.2991	-10.0806	4.39422e-06	0.000151389	LEPROT
200978_at	1.38774	11.3054	10.0796	4.39763e-06	0.000151405	MDH1
217677_at	-1.22311	6.16853	-10.0781	4.40301e-06	0.000151405	PLEKHA2
204192_at	-1.95264	8.62671	-10.0724	4.42316e-06	0.000151907	CD37
206210_s_at	2.61817	6.5785	10.0684	4.43745e-06	0.000152207	CETP
226736_at	-1.39116	7.75385	-10.067	4.44246e-06	0.000152234	CHURC1
204565_at	2.63807	8.86451	10.0666	4.44381e-06	0.000152234	ACOT13
222464_s_at	1.13394	9.12616	10.0617	4.46127e-06	0.000152662	MCMBP
202697_at	1.76173	9.17833	10.0604	4.4658e-06	0.0001527	NUDT21
201952_at	1.14415	10.0073	10.0558	4.48227e-06	0.000153072	ALCAM
200847_s_at	-2.04056	10.9557	-10.051	4.49947e-06	0.000153563	TMEM66
208964_s_at	2.22013	7.95138	10.0503	4.50226e-06	0.000153563	FADS1
205746_s_at	-1.78424	5.95773	-10.0493	4.50558e-06	0.00015358	ADAM17
204644_at	-1.04684	5.77023	-10.0479	4.51073e-06	0.000153643	ENOX2
225130_at	-1.02344	6.13831	-10.0473	4.51305e-06	0.000153643	ZRANB1
209193_at	-1.48089	8.64715	-10.0402	4.53859e-06	0.000154416	PIM1
227990_at	-1.04423	8.95775	-10.0379	4.54722e-06	0.000154614	SLU7
218561_s_at	1.90598	9.62708	10.0364	4.55262e-06	0.000154701	LYRM4
206518_s_at	1.86059	4.55127	10.0341	4.56087e-06	0.000154886	RGS9
223849_s_at	1.1884	7.12578	10.0289	4.5802e-06	0.000155349	MOV10
214298_x_at	-1.27072	8.97353	-10.0281	4.58306e-06	0.00015535	2013-09-06
225441_x_at	1.56981	9.06857	10.0272	4.58652e-06	0.000155371	LSMD1
1553976_a_at	2.10412	7.11699	10.0182	4.61954e-06	0.000156295	DPCD
209545_s_at	1.57227	9.30867	10.017	4.62417e-06	0.000156355	RIPK2
207786_at	-1.46879	5.98945	-10.0093	4.65267e-06	0.000157125	CYP2R1
201449_at	-1.1579	8.47065	-10.0074	4.65988e-06	0.000157174	TIA1
242957_at	1.3044	6.99098	10.0049	4.66932e-06	0.000157395	VWCE
228678_at	1.66015	7.32118	10.0036	4.67404e-06	0.000157457	FAM116B
230021_at	1.94094	6.10345	9.99871	4.69266e-06	0.000157793	TICRR
213579_s_at	-1.33948	8.71452	-9.99643	4.70126e-06	0.000157985	EP300
222986_s_at	-1.30727	8.60761	-9.9938	4.71122e-06	0.000158158	SHISA5
220116_at	2.62691	4.46759	9.99354	4.71221e-06	0.000158158	KCNN2
233110_s_at	1.28616	7.22597	9.98971	4.72679e-06	0.00015855	BCL2L12
218788_s_at	1.15057	8.05822	9.98709	4.73677e-06	0.000158752	SMYD3
203270_at	1.70459	7.70859	9.98619	4.7402e-06	0.000158752	DTYMK
212115_at	1.85556	9.29745	9.98585	4.74152e-06	0.000158752	HN1L
229145_at	-1.53102	9.25864	-9.98087	4.76061e-06	0.000159294	ANAPC16
214496_x_at	-1.28605	6.51685	-9.97972	4.765e-06	0.000159343	KAT6B
204190_at	-1.41612	8.607	-9.97788	4.77207e-06	0.000159385	USPL1
204875_s_at	1.47559	7.15766	9.97454	4.78497e-06	0.000159718	GMDS
219210_s_at	1.669	7.20503	9.96935	4.80505e-06	0.000160193	RAB8B
236259_at	-1.19507	8.64723	-9.96814	4.80975e-06	0.000160252	STK4
235749_at	1.19521	4.84981	9.96364	4.82724e-06	0.000160531	UGGT2
225850_at	1.86198	10.3675	9.96235	4.83229e-06	0.000160531	SFT2D1
1563111_a_at	1.72448	8.15296	9.96016	4.84082e-06	0.0001607	PIGX
243484_x_at	-1.26763	6.34152	-9.95825	4.84831e-06	0.000160712	NBPF24
205194_at	2.08281	7.30285	9.95781	4.85003e-06	0.000160712	PSPH
203393_at	-1.01368	4.21183	-9.95631	4.85592e-06	0.00016081	HES1
209303_at	1.31198	9.26937	9.95458	4.86272e-06	0.000160938	NDUFS4
230542_at	-1.1572	4.92964	-9.95379	4.86583e-06	0.000160943	ZNF597
1556067_a_at	-1.6904	5.95429	-9.94892	4.88501e-06	0.000161188	KDM6B
229082_at	1.08757	5.96939	9.94755	4.89042e-06	0.000161269	CCDC125
203729_at	-1.31548	8.36507	-9.94571	4.89771e-06	0.000161412	EMP3
204173_at	2.07455	8.7988	9.9433	4.90726e-06	0.000161478	MYL6B
227031_at	-1.10612	7.70272	-9.94277	4.90936e-06	0.000161478	SNX13
239427_at	1.18453	7.99104	9.94252	4.91038e-06	0.000161478	SLAMF1
200994_at	1.30875	9.39749	9.94213	4.91193e-06	0.000161478	IPO7
220295_x_at	2.29305	5.42842	9.94148	4.91449e-06	0.000161478	DEPDC1
224789_at	3.72098	7.95238	9.93989	4.92083e-06	0.00016159	DCAF12
236247_at	1.18772	7.04333	9.93757	4.93009e-06	0.000161796	NSUN4
39582_at	-1.48204	8.48904	-9.93437	4.94286e-06	0.000162118	CYLD
221142_s_at	1.73833	7.51544	9.92653	4.97435e-06	0.000162858	PECR
227021_at	1.01683	6.84498	9.91824	5.00788e-06	0.000163857	KDM1B
211582_x_at	2.39805	7.33682	9.9126	5.03084e-06	0.000164308	LST1
218073_s_at	1.66759	7.77105	9.91118	5.03666e-06	0.000164308	TMEM48
205052_at	2.06795	8.43318	9.90947	5.04366e-06	0.000164438	AUH
225614_at	1.03761	8.4642	9.90325	5.06916e-06	0.000165072	SAAL1
224965_at	1.26051	5.89301	9.9016	5.07597e-06	0.000165097	GNG2
222759_at	-1.38392	8.28729	-9.90008	5.08222e-06	0.000165202	SUV420H1
220731_s_at	1.3995	9.8441	9.89697	5.0951e-06	0.000165512	NECAP2
231319_x_at	1.39236	6.73541	9.89558	5.10082e-06	0.000165512	KIF9
204775_at	1.69058	6.864	9.89329	5.11034e-06	0.000165566	CHAF1B
204493_at	2.00666	8.16251	9.89318	5.11081e-06	0.000165566	BID
209389_x_at	1.52587	11.2559	9.89174	5.11679e-06	0.000165566	DBI
225060_at	1.9174	4.6369	9.89154	5.11763e-06	0.000165566	LRP11
229604_at	3.15561	5.84373	9.88601	5.14068e-06	0.000166095	CMAHP
218503_at	1.54745	7.71261	9.88566	5.14212e-06	0.000166095	FOCAD
209172_s_at	2.9329	5.81133	9.88543	5.14309e-06	0.000166095	CENPF
200673_at	-1.34517	10.6823	-9.87651	5.18053e-06	0.000167026	LAPTM4A
229568_at	-1.38615	5.82684	-9.87578	5.1836e-06	0.000167026	MOB3B
244250_at	1.19113	5.36131	9.87545	5.185e-06	0.000167026	ANXA6
205072_s_at	1.64393	6.60317	9.87449	5.18906e-06	0.000167026	XRCC4
232077_s_at	-2.57125	6.98718	-9.86918	5.21155e-06	0.000167418	YPEL3
224468_s_at	1.52322	8.21654	9.8646	5.231e-06	0.000167843	C19orf48
204062_s_at	1.68193	5.93263	9.86185	5.24275e-06	0.000168122	ULK2
230109_at	-1.55439	6.53213	-9.85956	5.25255e-06	0.000168337	PDE7B
223320_s_at	1.10844	9.01373	9.85763	5.26079e-06	0.000168502	ABCB10
202745_at	-1.03091	8.5179	-9.85669	5.26484e-06	0.000168509	USP8
220618_s_at	-1.27899	6.42838	-9.85615	5.26716e-06	0.000168509	ZCWPW1
214574_x_at	2.22474	7.44241	9.85475	5.27316e-06	0.000168602	LST1
202862_at	2.21321	6.82876	9.85361	5.27806e-06	0.00016866	FAH
235381_at	-1.30228	7.87683	-9.85117	5.2886e-06	0.000168832	RSF1
213469_at	-2.57621	6.01513	-9.84783	5.30302e-06	0.000169137	PGAP1
233982_x_at	1.16548	7.9659	9.84227	5.32713e-06	0.000169535	STYXL1
226726_at	2.89871	6.10491	9.8406	5.33441e-06	0.000169668	MBOAT2
228410_at	-1.21819	6.3065	-9.83886	5.34198e-06	0.00016981	GAB3
1555889_a_at	1.32502	8.74662	9.83267	5.36904e-06	0.000170455	CRTAP
219371_s_at	-4.36735	8.31397	-9.83236	5.37042e-06	0.000170455	KLF2
219300_s_at	-2.41565	5.08214	-9.83208	5.37162e-06	0.000170455	CNTNAP2
200811_at	-1.7298	10.7132	-9.83042	5.37891e-06	0.000170503	CIRBP
225367_at	1.62001	9.11387	9.82809	5.38919e-06	0.00017062	PGM2
229060_at	-2.03756	4.98203	-9.82794	5.38984e-06	0.00017062	YPEL2
233126_s_at	1.95785	4.01834	9.82664	5.39554e-06	0.00017062	OLAH
227020_at	-2.61337	8.24385	-9.82473	5.40401e-06	0.000170789	YPEL2
207057_at	-1.29469	6.6702	-9.82102	5.4204e-06	0.0001712	SLC16A7
203910_at	3.20684	5.45091	9.8188	5.43025e-06	0.000171321	ARHGAP29
208846_s_at	1.62825	9.54018	9.81685	5.4389e-06	0.000171487	VDAC3
205269_at	2.78147	6.89386	9.8162	5.4418e-06	0.000171487	LCP2
201037_at	2.21091	9.72481	9.81448	5.44948e-06	0.00017163	PFKP
200810_s_at	-1.59097	11.3017	-9.8124	5.45874e-06	0.000171734	CIRBP
235369_at	-1.21146	6.86719	-9.81234	5.45904e-06	0.000171734	C14orf28
218953_s_at	1.0197	7.81189	9.80802	5.47834e-06	0.000172242	PCYOX1L
226437_at	1.0731	6.72391	9.80347	5.49881e-06	0.000172786	YIF1B
212385_at	-1.49118	9.18468	-9.80221	5.50448e-06	0.000172865	TCF4
218461_at	1.64122	8.86096	9.80123	5.5089e-06	0.000172894	GPN3
202279_at	1.06079	9.41376	9.7976	5.52531e-06	0.00017322	C14orf2
208610_s_at	-1.83067	8.86469	-9.78991	5.56025e-06	0.000173836	SRRM2
228162_at	1.40376	6.2962	9.78962	5.56157e-06	0.000173836	ESD
200614_at	1.06555	11.2844	9.78908	5.56402e-06	0.000173836	CLTC
226247_at	-3.15104	7.44504	-9.78637	5.57639e-06	0.000174089	PLEKHA1
205349_at	2.7241	6.58611	9.78423	5.58622e-06	0.000174089	GNA15
217299_s_at	1.19751	7.78592	9.78403	5.58714e-06	0.000174089	NBN
212789_at	1.29019	8.51868	9.78383	5.58805e-06	0.000174089	NCAPD3
233089_at	-2.23136	6.12656	-9.78148	5.5988e-06	0.000174284	QRSL1
202803_s_at	1.22973	8.6681	9.78107	5.60068e-06	0.000174284	ITGB2
1558290_a_at	1.66033	7.67239	9.77916	5.60949e-06	0.000174459	PVT1
231994_at	3.44476	6.99549	9.77763	5.61651e-06	0.000174551	CHDH
201119_s_at	1.09898	11.2432	9.77525	5.62751e-06	0.000174682	COX8A
205449_at	1.94252	8.29135	9.77483	5.62943e-06	0.000174682	SAC3D1
1559227_s_at	-1.19225	7.28003	-9.77143	5.64519e-06	0.000175071	VHL
232247_at	-1.14387	6.10358	-9.76426	5.67855e-06	0.000175807	ZNF502
214148_at	-1.44055	6.5361	-9.76111	5.69327e-06	0.000176063	ITFG2
221756_at	-3.06352	7.97382	-9.75977	5.69952e-06	0.000176157	PIK3IP1
232398_at	2.45466	5.72411	9.75245	5.73395e-06	0.000176903	CCDC150
201518_at	1.29725	9.70654	9.75068	5.74229e-06	0.000176903	CBX1
228390_at	-2.39352	8.61586	-9.75051	5.74308e-06	0.000176903	RAB30
224729_s_at	2.21468	9.05853	9.74952	5.74777e-06	0.000176948	ATPAF1
224755_at	-1.45743	8.38519	-9.74727	5.7584e-06	0.000177175	TM9SF3
222946_s_at	1.53142	5.86519	9.73866	5.79937e-06	0.000178235	AUNIP
202307_s_at	1.19285	10.0267	9.73557	5.81414e-06	0.000178589	TAP1
221823_at	1.58662	7.34288	9.73373	5.82298e-06	0.000178597	C5orf30
227624_at	-1.1105	8.59084	-9.73299	5.82652e-06	0.000178597	TET2
222796_at	-1.58313	5.92353	-9.7322	5.83031e-06	0.000178597	PTCD1
224874_at	1.43812	9.32498	9.72993	5.84124e-06	0.000178597	POLR1D
204369_at	-1.09202	8.3946	-9.72805	5.85029e-06	0.000178597	PIK3CA
204319_s_at	2.1085	10.1546	9.72802	5.85046e-06	0.000178597	RGS10
227685_at	-1.04735	8.59407	-9.72775	5.85174e-06	0.000178597	TMF1
201890_at	5.87579	9.07979	9.72697	5.85551e-06	0.000178597	RRM2
227372_s_at	3.28007	7.09452	9.72685	5.8561e-06	0.000178597	BAIAP2L1
209251_x_at	1.49058	12.4038	9.72602	5.8601e-06	0.000178597	TUBA1C
218477_at	2.69481	9.39182	9.72582	5.86104e-06	0.000178597	TMEM14A
218614_at	-1.7697	9.82505	-9.72494	5.86534e-06	0.000178597	KIAA1551
202057_at	-1.55303	6.39373	-9.72408	5.86948e-06	0.000178597	KPNA1
200877_at	1.34759	11.2947	9.72399	5.86994e-06	0.000178597	CCT4
219258_at	1.6719	8.6169	9.7205	5.88684e-06	0.000179012	TIPIN
235980_at	-1.17724	6.9385	-9.71804	5.89881e-06	0.000179276	PIK3CA
211121_s_at	1.24551	6.91167	9.71307	5.92304e-06	0.000179912	DOK1
209678_s_at	2.07539	7.00268	9.70625	5.95647e-06	0.000180727	PRKCI
203394_s_at	-3.31368	7.27755	-9.70453	5.96493e-06	0.000180838	HES1
208963_x_at	1.95742	7.97704	9.68889	6.04254e-06	0.000183034	FADS1
224690_at	-1.7119	6.98051	-9.68507	6.06165e-06	0.000183511	FAM210B
203835_at	2.23595	7.22333	9.68173	6.07844e-06	0.000183816	LRRC32
209295_at	1.10784	9.78118	9.67931	6.09062e-06	0.000184082	TNFRSF10B
233955_x_at	-1.70595	10.5555	-9.67827	6.09588e-06	0.000184139	CXXC5
1553015_a_at	1.33165	7.34478	9.67682	6.1032e-06	0.000184259	RECQL4
205512_s_at	1.75072	8.56056	9.67503	6.11228e-06	0.00018435	AIFM1
226287_at	2.84249	7.8349	9.67489	6.11298e-06	0.00018435	CCDC34
204732_s_at	-1.58424	6.0227	-9.67243	6.12542e-06	0.000184624	TRIM23
204164_at	-1.04252	8.26497	-9.67023	6.13659e-06	0.000184789	SIPA1
223738_s_at	1.24551	7.92723	9.67002	6.13768e-06	0.000184789	PGM2
205805_s_at	-1.54418	5.21091	-9.66743	6.15085e-06	0.000185084	ROR1
223319_at	1.80295	8.15533	9.66656	6.15528e-06	0.000185115	GPHN
226016_at	-1.22966	10.3937	-9.66242	6.17644e-06	0.00018565	CD47
40148_at	-2.39281	4.9771	-9.65841	6.19704e-06	0.000186167	APBB2
229588_at	-1.91386	6.84859	-9.65325	6.22361e-06	0.000186555	DNAJC10
221773_at	-2.2121	8.89929	-9.64889	6.24617e-06	0.000186993	ELK3
236854_at	-1.34285	6.21089	-9.64808	6.25039e-06	0.000186993	LINC00494
214804_at	2.49854	5.86992	9.64763	6.25268e-06	0.000186993	CENPI
208478_s_at	1.62788	8.66981	9.64646	6.25875e-06	0.000186993	BAX
211793_s_at	1.11883	6.95077	9.64437	6.26963e-06	0.000187057	ABI2
205450_at	1.62379	5.82984	9.64381	6.27256e-06	0.000187057	PHKA1
219490_s_at	1.4082	5.94241	9.64272	6.27827e-06	0.000187057	DCLRE1B
212966_at	-1.31682	6.19307	-9.64065	6.28903e-06	0.000187057	HIC2
203211_s_at	1.20242	8.50553	9.64063	6.28913e-06	0.000187057	MTMR2
218979_at	1.6973	8.32989	9.63998	6.29253e-06	0.000187057	RMI1
228795_at	-1.42969	6.49569	-9.63975	6.29376e-06	0.000187057	PRKCB
201140_s_at	-1.05353	7.20857	-9.63755	6.30526e-06	0.000187257	RAB5C
204483_at	1.08722	6.76781	9.63314	6.32843e-06	0.000187843	ENO3
224724_at	1.50973	5.88611	9.62453	6.37388e-06	0.000188987	SULF2
235650_at	1.63574	4.99074	9.62324	6.38071e-06	0.000189086	CDHR3
1555609_a_at	1.37781	5.75092	9.62195	6.38759e-06	0.000189086	ZMAT3
211031_s_at	1.29236	6.9955	9.62111	6.39205e-06	0.000189115	CLIP2
36129_at	-1.39891	9.53476	-9.61913	6.40259e-06	0.000189261	SGSM2
202637_s_at	2.08671	8.05392	9.61889	6.40388e-06	0.000189261	ICAM1
204441_s_at	1.52389	7.48958	9.61374	6.43136e-06	0.000189956	POLA2
221485_at	1.70336	8.59634	9.61318	6.43437e-06	0.000189956	B4GALT5
209689_at	-1.08092	6.79849	-9.61183	6.44159e-06	0.000190067	CCDC93
222423_at	-2.04611	7.05322	-9.60988	6.45209e-06	0.000190171	NDFIP1
211597_s_at	3.44119	7.63552	9.60326	6.48772e-06	0.000191074	HOPX
212223_at	-1.6155	8.84988	-9.6029	6.48971e-06	0.000191074	IDS
205429_s_at	1.86827	6.97965	9.60147	6.49742e-06	0.000191198	MPP6
208302_at	2.14264	5.27967	9.59957	6.50771e-06	0.000191398	HMHB1
212330_at	2.00655	10.0716	9.59507	6.5322e-06	0.000191882	TFDP1
225327_at	-1.66996	9.3084	-9.59461	6.53468e-06	0.000191882	FAM214A
203560_at	2.41826	8.55077	9.59066	6.55626e-06	0.000192412	GGH
227529_s_at	1.94903	4.05141	9.58882	6.56635e-06	0.000192605	AKAP12
225935_at	-1.77257	6.40434	-9.58597	6.58198e-06	0.000192881	CUX1
223984_s_at	1.34508	5.51828	9.58383	6.59373e-06	0.000192994	NUPL1
208774_at	-1.33156	9.07793	-9.57998	6.61497e-06	0.000193362	CSNK1D
204604_at	-1.21317	8.28149	-9.57981	6.61592e-06	0.000193362	CDK14
211302_s_at	-3.28358	7.37141	-9.57963	6.61692e-06	0.000193362	PDE4B
238725_at	-1.71631	8.24133	-9.57668	6.63321e-06	0.000193734	IRF1
218051_s_at	1.80068	6.42324	9.57288	6.65434e-06	0.000194248	NT5DC2
223490_s_at	1.91206	8.04479	9.56719	6.68602e-06	0.000194969	EXOSC3
202276_at	1.46045	10.0378	9.56635	6.69071e-06	0.000194969	SHFM1
227410_at	-3.4793	7.17819	-9.56462	6.70045e-06	0.000194969	FAM43A
229501_s_at	-1.32123	8.01389	-9.56143	6.7183e-06	0.000195351	USP8
240834_at	1.63684	5.77459	9.56101	6.7207e-06	0.000195351	FAM105B
203971_at	1.79315	6.8292	9.56011	6.72576e-06	0.000195394	SLC31A1
208662_s_at	-1.31805	9.80072	-9.55934	6.73006e-06	0.000195415	TTC3
242414_at	2.10442	7.16619	9.55584	6.74982e-06	0.000195685	QPRT
213647_at	2.83481	7.54936	9.55579	6.75011e-06	0.000195685	DNA2
219169_s_at	1.47693	8.05466	9.55451	6.75732e-06	0.00019579	TFB1M
219556_at	1.35439	6.91509	9.55138	6.77503e-06	0.0001962	C16orf59
226316_at	-1.5997	9.27607	-9.54664	6.80199e-06	0.000196668	RBM26
211952_at	1.64368	7.29669	9.54232	6.82665e-06	0.000197228	IPO5
234465_at	1.27165	6.90008	9.54199	6.82856e-06	0.000197228	EME1
202613_at	1.7976	8.17828	9.54028	6.83836e-06	0.00019733	CTPS1
207164_s_at	-1.58026	4.10876	-9.53724	6.85579e-06	0.000197701	ZNF238
222119_s_at	-1.16325	9.16621	-9.53583	6.86387e-06	0.000197829	FBXO11
202974_at	1.03808	7.30985	9.53483	6.86966e-06	0.000197892	MPP1
226970_at	-1.31556	9.04388	-9.53301	6.88013e-06	0.000198055	FBXO33
227407_at	-1.71292	8.6217	-9.53258	6.88259e-06	0.000198055	TAPT1
202255_s_at	-1.4183	8.92768	-9.53023	6.8962e-06	0.000198343	SIPA1L1
229305_at	3.16646	6.66114	9.52606	6.92034e-06	0.000198933	MLF1IP
210829_s_at	1.83101	8.12694	9.52462	6.92872e-06	0.000199069	SSBP2
225143_at	1.11803	8.47146	9.52278	6.93941e-06	0.000199271	SFXN4
219703_at	2.95329	5.73257	9.52034	6.95367e-06	0.000199471	MNS1
204510_at	2.31359	7.90353	9.51313	6.99591e-06	0.000200262	CDC7
205026_at	1.2293	5.974	9.50949	7.01731e-06	0.000200665	STAT5B
225227_at	-1.53089	9.57967	-9.50663	7.03421e-06	0.000201043	SKIL
212179_at	-1.3745	9.4333	-9.49985	7.07439e-06	0.000202086	PNISR
204128_s_at	2.32062	7.33202	9.49723	7.09003e-06	0.000202427	RFC3
220215_at	-1.20875	6.57317	-9.49578	7.09867e-06	0.000202568	ZNF669
215711_s_at	1.86252	7.10925	9.49412	7.1086e-06	0.000202733	WEE1
226310_at	-1.75246	7.08795	-9.49315	7.11437e-06	0.000202733	RICTOR
219544_at	1.26273	8.09309	9.49295	7.11559e-06	0.000202733	BORA
242624_at	-1.04621	5.23688	-9.49173	7.12292e-06	0.000202833	ABLIM2
239964_at	-1.41182	5.79667	-9.49105	7.12695e-06	0.000202833	TCL6
201200_at	1.34512	8.09332	9.48995	7.13356e-06	0.000202833	CREG1
231166_at	-2.30901	6.50721	-9.48989	7.13394e-06	0.000202833	GPR155
221543_s_at	1.15782	8.36532	9.48349	7.17249e-06	0.000203823	ERLIN2
214061_at	1.85524	7.26225	9.47728	7.21011e-06	0.000204568	WDR67
217211_at	1.07938	7.37611	9.4767	7.21365e-06	0.000204568	ACTBP9
227373_at	-1.34541	9.1149	-9.47521	7.22267e-06	0.000204669	ATXN1L
223992_x_at	-1.03066	6.8278	-9.47488	7.2247e-06	0.000204669	ZCWPW1
228976_at	-1.81335	7.52635	-9.47046	7.25166e-06	0.00020522	ICOSLG
227548_at	-1.19594	7.39601	-9.46974	7.2561e-06	0.000205239	ORMDL1
1552263_at	1.53613	8.39166	9.46691	7.27342e-06	0.000205623	MAPK1
211955_at	1.32552	9.67565	9.46429	7.28948e-06	0.00020597	IPO5
37408_at	1.12058	7.2834	9.4582	7.32707e-06	0.000206712	MRC2
219066_at	1.15404	7.6175	9.4537	7.35495e-06	0.000207284	PPCDC
225619_at	1.79465	8.13432	9.44953	7.38089e-06	0.000207801	SLAIN1
220239_at	1.53495	7.76083	9.44433	7.41338e-06	0.000208609	KLHL7
211153_s_at	1.04171	4.98257	9.44097	7.43449e-06	0.000208859	TNFSF11
219869_s_at	2.37954	7.29295	9.44048	7.43755e-06	0.000208859	SLC39A8
206574_s_at	2.61773	6.77449	9.43921	7.44557e-06	0.000208977	PTP4A3
225562_at	-2.11532	7.90369	-9.43788	7.45393e-06	0.00020902	RASA3
228111_s_at	-1.32194	6.38197	-9.43605	7.46549e-06	0.000209214	DNAH1
226024_at	1.55476	9.34826	9.43368	7.48045e-06	0.000209489	COMMD1
204857_at	-1.47882	8.10466	-9.43308	7.48426e-06	0.000209489	MAD1L1
226979_at	-1.82378	9.3102	-9.42886	7.51105e-06	0.000209952	MAP3K2
210293_s_at	1.50665	9.9053	9.42792	7.517e-06	0.000210011	SEC23B
33197_at	1.41171	5.44276	9.42679	7.52417e-06	0.000210104	MYO7A
226439_s_at	-1.37567	4.96009	-9.42614	7.52834e-06	0.000210113	NBEA
221983_at	-1.02726	8.69857	-9.42247	7.55176e-06	0.000210659	FAM134A
213982_s_at	1.63458	9.98932	9.42116	7.56017e-06	0.000210787	RABGAP1L
214293_at	1.92391	5.93301	9.41797	7.58062e-06	0.000211196	2013-09-11
204752_x_at	1.14127	8.5554	9.41766	7.58257e-06	0.000211196	PARP2
223311_s_at	1.49254	7.20983	9.41462	7.60214e-06	0.000211633	MTA3
224933_s_at	-1.58624	8.36086	-9.41122	7.6241e-06	0.000212028	JMJD1C
215936_s_at	-1.46257	7.82015	-9.40776	7.64649e-06	0.000212543	KIAA1033
225649_s_at	1.23651	10.0885	9.40685	7.65236e-06	0.000212598	STK35
205577_at	-1.44604	5.44497	-9.40229	7.68204e-06	0.000213314	PYGM
218309_at	-2.14632	5.97832	-9.39623	7.72166e-06	0.000213851	CAMK2N1
211070_x_at	1.28409	11.7746	9.3952	7.72838e-06	0.000213851	DBI
223785_at	1.78808	6.11066	9.39462	7.7322e-06	0.000213851	FANCI
236248_x_at	-2.10206	7.73812	-9.3945	7.73296e-06	0.000213851	TADA2B
225734_at	2.49251	8.1616	9.39281	7.74406e-06	0.000213851	FBXO22
229978_at	2.32274	4.69921	9.3928	7.74414e-06	0.000213851	SHISA9
220840_s_at	2.68992	6.81867	9.39276	7.74439e-06	0.000213851	C1orf112
242519_at	1.50636	5.14848	3.06554	0.0140288	0.0497453	CCDC152
208955_at	2.10986	8.05105	9.38977	7.7641e-06	0.000214134	DUT
223599_at	1.66754	5.71314	9.38954	7.7656e-06	0.000214134	TRIM6
224964_s_at	1.25023	10.1598	9.38942	7.76641e-06	0.000214134	GNG2
214358_at	1.24749	6.47929	9.38729	7.78048e-06	0.000214404	ACACA
208382_s_at	1.9499	4.82876	9.37997	7.82903e-06	0.000215417	DMC1
227740_at	-1.25983	7.12444	-9.37943	7.83264e-06	0.000215417	UHMK1
232587_at	-1.19689	5.8671	-3.0743	0.0138352	0.0491961	EML4
214848_at	-1.58412	5.99882	-9.37474	7.86389e-06	0.000215951	YWHAZ
243683_at	-1.14805	6.3407	-3.07586	0.0138011	0.04911	MORF4L2
206995_x_at	3.422	6.26816	9.37219	7.88098e-06	0.000216203	SCARF1
212697_at	-1.14073	9.31202	-9.37009	7.8951e-06	0.000216482	FAM134C
215767_at	-1.29026	5.77257	-3.07888	0.0137352	0.0489196	ZNF804A
224655_at	1.26729	10.0252	9.36687	7.9167e-06	0.000216965	AK3
228098_s_at	-1.11005	9.35166	-3.08186	0.0136705	0.0487435	MYLIP
202153_s_at	1.14941	9.58133	9.35738	7.98096e-06	0.000218289	NUP62
209366_x_at	2.45259	9.48206	9.35613	7.98947e-06	0.00021834	CYB5A
225585_at	1.50379	9.25996	9.35593	7.99081e-06	0.00021834	RAP2A
213172_at	-1.37491	5.78557	-9.35379	8.00541e-06	0.000218629	TTC9
228003_at	-1.88003	8.35789	-9.34925	8.03641e-06	0.000219366	RAB30
238706_at	-1.26502	5.7282	-3.0908	0.0134782	0.0482121	PAPD4
224479_s_at	1.06538	8.6278	9.3439	8.07315e-06	0.000220149	MRPL45
206026_s_at	2.18522	5.29228	9.33921	8.10552e-06	0.000220702	TNFAIP6
213461_at	1.58266	7.69943	9.33744	8.11779e-06	0.000220816	NUDT21
211828_s_at	1.16142	6.5893	3.09695	0.0133476	0.0478817	TNIK
219213_at	1.45407	5.83735	3.09826	0.0133199	0.0478162	JAM2
204143_s_at	1.13627	7.6965	3.09854	0.013314	0.0478028	ENOSF1
1555349_a_at	1.11887	7.59377	9.33317	8.14741e-06	0.000221512	ITGB2
217911_s_at	1.10681	7.13425	3.10065	0.0132696	0.0476654	BAG3
239252_at	-2.57765	5.83638	-9.3285	8.17993e-06	0.000222222	COX7B
206056_x_at	-1.02892	8.24584	-3.10182	0.0132452	0.0476013	SPN
223460_at	-1.212	7.10066	-9.32656	8.19352e-06	0.000222433	CAMKK1
212616_at	-1.18737	9.28424	-9.32554	8.20064e-06	0.000222516	CHD9
225136_at	-1.12248	10.8035	-9.323	8.21847e-06	0.000222889	PLEKHA2
225216_at	-1.1573	8.38377	-9.32146	8.22926e-06	0.000223071	FAM199X
1559645_at	1.66444	5.41326	3.10583	0.0131612	0.0473695	LINC00184
226134_s_at	-1.34527	9.10314	-9.3194	8.24381e-06	0.000223355	MSI2
213998_s_at	-1.53426	6.88433	-9.3157	8.26994e-06	0.000223952	DDX17
240762_at	-2.4006	4.93106	-9.3145	8.27843e-06	0.000224071	HNRNPK
209932_s_at	1.3325	11.0555	9.31311	8.28823e-06	0.000224207	DUT
210754_s_at	-1.58235	10.2783	-9.31263	8.29165e-06	0.000224207	LYN
1555638_a_at	1.29295	9.30402	3.11107	0.0130526	0.0470652	SAMSN1
221586_s_at	-1.18694	8.47488	-9.3079	8.32522e-06	0.000224948	E2F5
222686_s_at	1.26667	6.68138	9.30761	8.32729e-06	0.000224948	CPPED1
241871_at	3.74859	6.38908	9.30454	8.34926e-06	0.000225319	CAMK4
215850_s_at	-1.63753	4.2222	-9.30225	8.36564e-06	0.000225649	NDUFA5
215374_at	-1.10468	5.60242	-3.11657	0.0129396	0.046735	PAPOLA
226354_at	1.38353	9.38616	9.29906	8.38844e-06	0.000226153	LACTB
227458_at	1.1279	7.39503	3.11889	0.0128923	0.0466041	CD274
203787_at	1.98152	8.65023	9.29645	8.40728e-06	0.000226482	SSBP2
231955_s_at	1.00818	6.51578	3.11939	0.012882	0.0465792	HIBADH
200903_s_at	1.43533	9.74118	9.29622	8.40893e-06	0.000226482	AHCY
202426_s_at	1.747	6.73241	9.29366	8.42733e-06	0.000226866	RXRA
225357_s_at	-1.31129	7.07138	-9.29195	8.43974e-06	0.000227088	INO80
212581_x_at	1.65826	12.7819	9.28935	8.45857e-06	0.000227371	GAPDH
206965_at	-1.46338	4.33549	-3.12344	0.0127999	0.0463455	KLF12
223824_at	1.3675	6.60973	3.12585	0.0127512	0.0462069	RNLS
225956_at	-2.52222	8.14819	-9.28185	8.51312e-06	0.000228725	CREBRF
201471_s_at	-1.57094	9.46675	-9.27998	8.52676e-06	0.000228979	SQSTM1
221581_s_at	1.2351	10.016	9.27619	8.55449e-06	0.000229567	LAT2
212229_s_at	-1.01843	8.73599	-9.27427	8.56862e-06	0.00022969	FBXO21
233360_at	-1.24805	5.95528	-3.13311	0.0126058	0.0457803	UBE2I
1554351_a_at	1.27113	8.56414	9.27102	8.59253e-06	0.000230021	TIPRL
227224_at	-1.25258	9.001	-3.13379	0.0125922	0.045741	RALGPS2
225957_at	-2.33601	8.11947	-9.27069	8.59502e-06	0.000230021	CREBRF
211767_at	1.7381	7.01774	9.26669	8.62455e-06	0.000230585	GINS4
203130_s_at	1.29293	6.4492	9.2651	8.63637e-06	0.000230676	KIF5C
238013_at	-1.41268	8.0354	-9.26266	8.65443e-06	0.000230933	PLEKHA2
211750_x_at	1.39371	12.3996	9.2618	8.66083e-06	0.000230991	TUBA1C
226037_s_at	1.37183	8.55257	9.26078	8.66847e-06	0.000231071	TAF9B
203405_at	1.69155	9.22089	9.26027	8.67228e-06	0.000231071	PSMG1
221249_s_at	-1.12427	8.89861	-9.25886	8.68273e-06	0.000231128	FAM117A
205569_at	4.52336	7.91774	9.25884	8.68289e-06	0.000231128	LAMP3
210571_s_at	3.00808	6.29007	9.25764	8.69187e-06	0.000231254	CMAHP
222754_at	2.08692	8.90947	9.25394	8.71955e-06	0.000231765	TRNT1
205160_at	1.39068	6.08649	3.1443	0.0123848	0.0451666	PEX11A
203751_x_at	-1.28734	5.86623	-9.24689	8.77257e-06	0.000233061	JUND
239021_at	-1.2929	6.26447	-9.24591	8.78001e-06	0.000233146	TLR6
214146_s_at	-3.2756	4.58178	-3.14954	0.0122829	0.0448849	PPBP
223342_at	-1.02739	9.77172	-9.24073	8.81922e-06	0.00023396	RRM2B
204900_x_at	2.81434	8.48649	9.23608	8.85459e-06	0.000234784	SAP30
225777_at	1.4937	7.14491	9.23533	8.86032e-06	0.000234822	SAPCD2
235226_at	1.28024	6.71793	3.1545	0.012187	0.0446299	CDK19
234050_at	-2.00704	6.84481	-9.23396	8.87072e-06	0.000234984	TAGAP
213758_at	-2.18849	7.82313	-9.23299	8.87818e-06	0.000235068	COX4I1
223588_at	1.163	4.88046	3.15814	0.0121174	0.0444524	THAP2
226943_at	1.90738	7.91498	9.22675	8.92602e-06	0.000236092	C12orf73
203288_at	-1.13457	7.96017	-9.22625	8.92984e-06	0.000236092	KIAA0355
235678_at	-1.09939	7.24546	-3.15979	0.0120857	0.0443689	GM2A
209278_s_at	6.08827	8.22372	9.22461	8.94253e-06	0.000236268	TFPI2
243608_at	-1.0342	4.54339	-3.16131	0.0120569	0.0443049	COG2
1554522_at	-1.31834	6.14246	-3.16242	0.0120358	0.0442392	CNNM2
33736_at	1.09027	7.06831	9.21994	8.97859e-06	0.000236931	STOML1
223982_s_at	-1.19918	9.33247	-9.21965	8.98079e-06	0.000236931	PNPLA8
203856_at	1.11843	9.63732	9.21861	8.98889e-06	0.000236931	VRK1
208370_s_at	1.01214	7.50423	9.21829	8.99137e-06	0.000236931	RCAN1
200623_s_at	1.02284	8.28396	9.21822	8.99191e-06	0.000236931	CALM3
227212_s_at	2.32404	8.23472	9.21622	9.00741e-06	0.000237225	PHF19
224838_at	-1.70759	10.0894	-9.21523	9.01513e-06	0.000237315	FOXP1
226331_at	-1.00612	8.69788	-9.21327	9.03037e-06	0.000237561	BBX
222609_s_at	1.23386	9.35025	9.21086	9.04917e-06	0.000237753	EXOSC1
218097_s_at	1.33666	9.20276	9.21004	9.05559e-06	0.000237807	CUEDC2
213564_x_at	1.27764	12.5114	9.20778	9.0733e-06	0.000237999	LDHB
1552291_at	1.57002	7.90209	9.20743	9.07597e-06	0.000237999	PIGX
225237_s_at	-1.67044	7.65469	-9.20454	9.09869e-06	0.000238366	MSI2
221796_at	1.88998	4.92213	9.20095	9.12691e-06	0.000238978	NTRK2
213600_at	-1.62034	7.81813	-9.19629	9.16375e-06	0.000239543	SIPA1L3
227729_at	-1.41313	7.46043	-9.19576	9.16795e-06	0.000239543	ZNF134
226858_at	-1.66054	7.44602	-9.19552	9.16989e-06	0.000239543	CSNK1E
220329_s_at	1.58428	7.82695	9.19264	9.1927e-06	0.000240024	RMND1
230133_at	-1.73937	6.00813	-3.18291	0.0116533	0.0431641	RC3H2
214722_at	-1.28848	8.86407	-3.18343	0.0116438	0.0431407	NOTCH2NL
221054_s_at	-2.06911	4.23328	-9.18157	9.28115e-06	0.000241641	TCL6
223098_s_at	1.45407	7.87371	9.18001	9.29372e-06	0.000241853	LONP2
200951_s_at	2.53269	7.99522	9.17572	9.32826e-06	0.000242406	CCND2
212414_s_at	-1.07775	10.0854	-9.17444	9.33862e-06	0.00024256	2013-09-06
209211_at	1.05394	5.15449	3.18869	0.0115477	0.0428571	KLF5
217521_at	-1.12506	5.50472	-9.17188	9.35936e-06	0.000242868	HAL
232365_at	-1.74132	5.10543	-3.19019	0.0115204	0.0427733	SIAH1
239377_at	-1.19891	8.91231	-9.17	9.3746e-06	0.000243027	EIF1AD
205518_s_at	2.63733	7.88819	9.16782	9.39229e-06	0.000243261	CMAHP
219045_at	2.10276	9.10244	9.16207	9.4392e-06	0.000244129	RHOF
225898_at	1.37495	9.3528	9.1601	9.45532e-06	0.00024443	WDR54
1553861_at	-3.08591	4.72124	-9.15763	9.4756e-06	0.000244774	TCP11L2
224170_s_at	-1.09912	4.25099	-9.15739	9.47758e-06	0.000244774	TULP4
218654_s_at	1.5473	9.6899	9.15203	9.52175e-06	0.000245451	MRPS33
1559343_at	1.08182	4.93315	9.15079	9.53202e-06	0.0002456	SNHG14
224553_s_at	-1.46603	6.47097	-3.2032	0.011287	0.0420636	TNFRSF18
202626_s_at	-1.62759	10.7716	-9.14752	9.55911e-06	0.000246182	LYN
204929_s_at	1.82518	7.69769	9.14671	9.56586e-06	0.00024624	VAMP5
203921_at	-1.17939	7.79135	-3.20545	0.0112472	0.0419454	CHST2
233874_at	-1.25978	5.35538	-3.20664	0.0112261	0.0418795	SLAIN2
207286_at	-1.57289	5.1927	-3.20988	0.0111691	0.0417494	CEP135
203505_at	-3.52527	5.70007	-9.13311	9.67945e-06	0.000248456	ABCA1
222998_at	-1.13102	7.74444	-9.12945	9.71033e-06	0.000248995	MAF1
234954_at	1.72439	7.43788	9.12903	9.71387e-06	0.000248995	GAPDHP73
220773_s_at	2.02376	6.80881	9.12386	9.75766e-06	0.00025	GPHN
224828_at	-1.11292	6.70858	-3.21751	0.011036	0.0413906	CPEB4
1568678_s_at	1.12038	7.91391	9.12137	9.77885e-06	0.000250426	FGFR1OP
203960_s_at	1.39185	8.97664	9.11447	9.83773e-06	0.000251709	HSPB11
204063_s_at	1.12745	5.5865	9.11362	9.84499e-06	0.000251709	ULK2
201996_s_at	-1.8574	7.43119	-9.11321	9.84849e-06	0.000251709	SPEN
215501_s_at	-1.00307	7.88529	-3.22373	0.0109286	0.0410609	DUSP10
1553148_a_at	-1.12528	5.38177	-9.10898	9.88487e-06	0.000252431	SNX13
226568_at	2.35148	9.43237	9.10836	9.89016e-06	0.000252442	FAM102B
212319_at	-1.63839	7.62613	-9.10601	9.91047e-06	0.000252731	SGSM2
1554271_a_at	1.62988	7.09648	9.10501	9.9191e-06	0.000252833	CENPL
204199_at	-1.97033	6.02354	-9.10339	9.93309e-06	0.000253072	RALGPS1
227448_at	-2.73253	6.95807	-9.09994	9.96307e-06	0.000253717	ARGLU1
239533_at	-2.83651	6.02112	-9.09871	9.97372e-06	0.00025387	GPR155
235611_at	-1.65496	7.01405	-3.23294	0.0107716	0.0406024	SREK1
238568_s_at	-1.09981	5.24761	-3.23308	0.0107693	0.0406019	NPC1
206255_at	-1.30841	8.14255	-3.23339	0.010764	0.0405905	BLK
242650_at	-1.39026	4.4153	-3.23426	0.0107494	0.0405692	ZFAND4
223134_at	-1.30622	9.10755	-9.09287	1.00246e-05	0.00025495	BBX
213911_s_at	1.07195	12.1622	9.09278	1.00255e-05	0.00025495	H2AFZ
223533_at	1.94911	7.47656	9.08892	1.00592e-05	0.00025569	LRRC8C
203658_at	1.10167	7.61036	9.08703	1.00758e-05	0.000255874	SLC25A20
203923_s_at	-1.32459	9.76401	-9.08474	1.0096e-05	0.000256168	CYBB
219060_at	1.71016	8.11248	9.08465	1.00968e-05	0.000256168	WDYHV1
210742_at	-1.22	4.36104	-3.24033	0.0106475	0.0402762	CDC14A
203771_s_at	2.08033	7.00711	9.08315	1.01101e-05	0.000256371	BLVRA
202270_at	1.45941	8.06196	3.24133	0.0106307	0.0402294	GBP1
229513_at	-1.23981	8.67739	-3.24137	0.0106302	0.0402294	STRBP
1569225_a_at	-1.17664	4.65361	-3.24138	0.01063	0.0402294	SCML4
236539_at	-1.48803	8.02347	-9.08215	1.01189e-05	0.000256371	PTPN22
1554309_at	-1.91294	5.9486	-3.24281	0.0106061	0.0401661	EIF4G3
212533_at	1.60069	9.58332	9.07756	1.01595e-05	0.000257282	WEE1
223697_x_at	-1.07313	9.45495	-3.2442	0.010583	0.04011	C9orf64
203422_at	1.26402	7.87513	9.07505	1.01818e-05	0.000257609	POLD1
211139_s_at	1.24722	6.78448	9.07437	1.01879e-05	0.000257642	NAB1
218807_at	-2.46977	6.75883	-9.06708	1.0253e-05	0.00025905	VAV3
212995_x_at	1.08349	10.5541	9.06455	1.02757e-05	0.000259164	MZT2B
227668_at	-1.16495	7.89512	-9.06446	1.02765e-05	0.000259164	ENTHD2
210432_s_at	-2.02042	6.03088	-3.25207	0.0104532	0.0397335	SCN3A
219662_at	1.2679	7.27422	9.06344	1.02857e-05	0.000259276	C2orf49
225603_s_at	1.15718	6.901	3.25582	0.0103919	0.039542	TRIQK
65630_at	-1.22424	7.53377	-9.05666	1.03469e-05	0.000260171	TMEM80
209992_at	-1.69388	5.08443	-9.05634	1.03498e-05	0.000260171	PFKFB2
212386_at	-1.29728	11.162	-9.0554	1.03583e-05	0.000260267	TCF4
229001_at	-1.12495	7.22851	-3.25856	0.0103473	0.0394107	PPP1R3E
216373_at	-1.16424	3.57489	-3.25895	0.010341	0.0393921	TAPT1
34408_at	2.19444	6.78281	9.04859	1.04202e-05	0.000261348	RTN2
211212_s_at	1.02114	6.47291	3.26318	0.0102728	0.0392004	ORC5
222870_s_at	1.74676	9.71609	9.04268	1.04743e-05	0.000262355	B3GNT2
232366_at	-1.37883	5.6374	-9.03971	1.05017e-05	0.000262782	KIAA0232
202283_at	-1.5328	5.82842	-3.26979	0.010167	0.0388944	SERPINF1
1558621_at	-1.2812	5.71582	-3.27073	0.010152	0.0388508	CABLES1
231403_at	-1.21202	6.54014	-3.27096	0.0101482	0.0388471	TRIO
219892_at	1.30632	6.31223	3.27246	0.0101245	0.0387725	TM6SF1
229391_s_at	-2.61674	8.31776	-9.02739	1.06157e-05	0.000264526	FAM26F
201581_at	-1.45076	9.50433	-9.02696	1.06197e-05	0.000264526	TMX4
230986_at	-1.95949	6.4396	-9.02612	1.06276e-05	0.000264552	KLF8
226351_at	1.58134	7.33776	9.01719	1.07112e-05	0.000265956	NSUN4
210701_at	-1.58988	5.62422	-3.27943	0.0100147	0.0384651	CFDP1
205926_at	-1.00933	7.10995	-9.01506	1.07313e-05	0.000266222	IL27RA
227934_at	-1.9951	7.84723	-9.01381	1.07431e-05	0.000266222	KPNA5
235334_at	-2.14077	5.10023	-9.01243	1.07561e-05	0.000266345	ST6GALNAC3
1559776_at	-1.5937	8.20405	-3.28369	0.00994804	0.0382684	GM2A
242248_at	-1.51187	4.19166	-3.28377	0.00994687	0.0382666	PHKB
225378_at	1.37944	7.60654	9.00648	1.08125e-05	0.00026739	VPS37A
212387_at	-1.65658	10.0792	-9.00595	1.08175e-05	0.00026739	TCF4
226142_at	-2.5243	7.27838	-9.00592	1.08179e-05	0.00026739	GLIPR1
244519_at	1.07354	8.1554	3.28626	0.00990814	0.0381498	ASXL1
238008_at	1.37583	5.79718	3.28751	0.00988885	0.038089	PRR18
207651_at	2.33319	5.20427	9.00203	1.08549e-05	0.000268184	GPR171
204994_at	-1.20615	8.23455	-3.28851	0.00987333	0.0380493	MX2
209662_at	1.98604	9.51665	8.99655	1.09073e-05	0.000269236	CETN3
220576_at	-2.93493	5.65974	-8.99173	1.09538e-05	0.000270248	PGAP1
220855_at	-1.06403	4.86229	-3.29483	0.00977628	0.0377458	CLTC-IT1
218447_at	1.57604	9.736	8.98914	1.09787e-05	0.000270509	CMC2
232081_at	-2.96588	5.56566	-8.98841	1.09858e-05	0.000270558	ABCG1
213153_at	-1.53544	9.32226	-8.98792	1.09906e-05	0.000270558	SETD1B
244841_at	1.14986	5.36953	3.29955	0.00970429	0.037566	SEC24A
217864_s_at	-1.08303	8.9069	-8.97942	1.10731e-05	0.000271612	PIAS1
214761_at	2.50919	5.14031	8.97885	1.10788e-05	0.000271628	ZNF423
1569064_at	-1.179	4.71055	-3.3017	0.00967181	0.0374721	C15orf62
241844_x_at	-1.341	7.02291	-3.30439	0.00963118	0.0373464	TMEM156
201753_s_at	-1.13164	9.87059	-8.97261	1.11399e-05	0.00027276	ADD3
221025_x_at	1.00066	6.65938	8.96704	1.11947e-05	0.000273858	PUS7L
201552_at	-1.02358	9.60342	-8.96313	1.12334e-05	0.00027468	LAMP1
209695_at	2.558	7.1036	8.96076	1.12569e-05	0.00027501	PTP4A3
203257_s_at	1.0737	8.32813	8.95941	1.12703e-05	0.000275214	C11orf49
230300_at	-1.26227	6.05874	-3.31349	0.00949531	0.0369549	PSMA5
211965_at	-1.53418	6.83548	-3.31474	0.00947685	0.0368998	ZFP36L1
201892_s_at	1.29325	11.6033	8.95476	1.13168e-05	0.000275992	IMPDH2
215773_x_at	1.23637	8.47845	8.95318	1.13325e-05	0.00027624	PARP2
243039_at	-1.33792	5.49865	-3.31878	0.0094172	0.0366963	COBLL1
202968_s_at	-1.07633	8.16452	-3.31922	0.00941071	0.0366736	DYRK2
238551_at	1.73582	6.8745	3.31989	0.00940094	0.0366564	FUT11
207838_x_at	-1.76675	6.3169	-8.94569	1.14078e-05	0.000277504	PBXIP1
203216_s_at	2.14232	6.07415	8.94556	1.14092e-05	0.000277504	MYO6
222879_s_at	1.3499	6.89812	8.9455	1.14098e-05	0.000277504	POLH
218046_s_at	1.44883	8.93928	8.94263	1.14388e-05	0.000277715	MRPS16
225205_at	1.06143	8.47674	8.93955	1.14699e-05	0.000278224	KIF3B
207843_x_at	2.48764	9.42871	8.93839	1.14817e-05	0.000278358	CYB5A
226605_at	-1.28034	7.86926	-8.93801	1.14856e-05	0.000278358	DGKQ
209457_at	-1.25168	8.55027	-3.32548	0.00931922	0.0364121	DUSP5
204249_s_at	1.82549	7.83613	3.32738	0.00929166	0.036334	LMO2
206312_at	-1.52905	5.03421	-3.32741	0.00929132	0.036334	GUCY2C
244865_at	-1.19256	6.4658	-8.93052	1.15619e-05	0.000279836	HAX1
221027_s_at	1.97179	6.49073	8.92856	1.15821e-05	0.000280053	PLA2G12A
239282_at	1.36364	4.56014	3.33077	0.00924264	0.0361811	CCDC41
223625_at	1.27252	6.67913	8.92819	1.15859e-05	0.000280053	FAM126A
204899_s_at	1.47615	6.92256	8.92779	1.15899e-05	0.000280053	SAP30
215728_s_at	1.40656	6.69647	8.92765	1.15914e-05	0.000280053	ACOT7
208699_x_at	1.40933	9.38316	8.91894	1.16812e-05	0.000281848	TKT
227533_at	-1.43043	8.85647	-3.33642	0.00916166	0.0359542	RALGPS2
202218_s_at	1.62482	7.25606	8.91506	1.17214e-05	0.00028257	FADS2
202450_s_at	-1.00212	6.41279	-3.34111	0.00909487	0.0357571	CTSK
204446_s_at	-1.12273	10.8988	-8.90881	1.17866e-05	0.000283514	ALOX5
228988_at	-1.58234	7.24207	-3.34273	0.00907196	0.0356841	ZNF711
206348_s_at	1.36556	7.03318	8.90782	1.1797e-05	0.000283514	PDK3
229943_at	-1.40767	6.53383	-3.34297	0.00906859	0.0356734	TRIM13
205856_at	2.37586	4.92952	8.90703	1.18052e-05	0.000283514	SLC14A1
1598_g_at	1.43067	7.79394	8.90688	1.18068e-05	0.000283514	GAS6
226285_at	1.30705	7.3896	8.90683	1.18073e-05	0.000283514	CAPRIN1
1554258_a_at	2.12287	6.34046	8.90313	1.18461e-05	0.000283949	DNAJC5B
219002_at	1.33842	9.33054	8.90257	1.18521e-05	0.000283966	FASTKD1
219191_s_at	-1.3078	7.57016	-8.89129	1.19714e-05	0.000286324	BIN2
232096_x_at	-1.52742	6.43969	-3.353	0.00892798	0.0352431	FOXP1-IT1
204389_at	2.05007	4.49724	8.89053	1.19795e-05	0.000286391	MAOA
227799_at	1.76116	8.0834	8.88731	1.20138e-05	0.000286954	MYO1G
227172_at	1.05266	6.61889	8.88685	1.20187e-05	0.000286954	TMEM116
226537_at	1.54073	5.97817	8.88553	1.20328e-05	0.00028704	HINT3
226896_at	1.08535	9.61312	8.88005	1.20916e-05	0.00028819	CHCHD1
220560_at	-1.30315	5.6859	-3.35984	0.00883348	0.0349422	C11orf21
224394_at	1.21359	4.87484	8.87809	1.21127e-05	0.000288568	RNF7
213034_at	-1.8137	9.18332	-8.87593	1.2136e-05	0.000288997	SIK3
222838_at	1.24462	9.56603	3.36244	0.00879776	0.0348311	SLAMF7
240990_at	-1.12035	3.90778	-3.36519	0.00876022	0.0347126	RAB5A
230180_at	-1.95228	8.01872	-8.86936	1.22072e-05	0.000290566	DDX17
202056_at	-1.23204	7.63366	-8.86884	1.22128e-05	0.000290572	KPNA1
210950_s_at	1.52631	10.3781	8.867	1.22328e-05	0.000290766	FDFT1
209939_x_at	2.24051	10.9377	8.86663	1.22369e-05	0.000290766	CFLAR
1554575_a_at	1.10082	6.51125	8.86377	1.22681e-05	0.000291129	BPNT1
217968_at	1.51423	8.63444	8.86274	1.22793e-05	0.000291268	TSSC1
214962_s_at	-1.01255	6.00897	-3.36957	0.00870082	0.0345448	NUP160
232362_at	1.48633	5.93361	3.3697	0.00869896	0.0345448	CCDC18
1569136_at	-2.16297	5.40406	-3.36982	0.00869741	0.0345414	MGAT4A
225716_at	1.43203	9.64124	8.85916	1.23186e-05	0.000291946	BRI3BP
218528_s_at	-1.26952	9.4004	-8.85473	1.23674e-05	0.000292975	RNF38
208631_s_at	1.39027	9.76068	8.84901	1.24306e-05	0.000294345	HADHA
209624_s_at	1.32003	6.80794	8.84842	1.24371e-05	0.000294355	MCCC2
219715_s_at	1.68332	8.01052	8.848	1.24418e-05	0.000294355	TDP1
203665_at	-1.28431	6.75884	-3.3784	0.00858221	0.0341931	HMOX1
229415_at	-1.08363	6.46957	-3.37966	0.00856535	0.0341383	CYCS
223520_s_at	-1.01472	4.4678	-3.37984	0.0085629	0.0341338	KIF13A
221763_at	-1.48999	9.71666	-8.84351	1.24917e-05	0.000295281	JMJD1C
210176_at	-3.0438	7.26284	-8.84138	1.25155e-05	0.000295587	TLR1
223157_at	1.3937	9.54528	8.84024	1.25282e-05	0.000295761	NOA1
204635_at	-1.49307	6.68003	-8.83432	1.25947e-05	0.000296946	RPS6KA5
229390_at	-2.7786	9.0998	-8.83238	1.26165e-05	0.000297331	FAM26F
235198_at	-1.1976	6.74588	-8.82991	1.26444e-05	0.000297859	OSTM1
226536_at	1.61483	8.29478	8.8246	1.27045e-05	0.000299052	NSMCE2
225429_at	-1.31665	8.70175	-8.82448	1.27059e-05	0.000299052	PPP6C
203249_at	-1.30119	7.94377	-8.82391	1.27123e-05	0.000299074	EZH1
219105_x_at	2.18319	8.89999	8.82194	1.27348e-05	0.000299474	ORC6
233224_at	-1.34234	4.94651	-3.39417	0.00837446	0.0335709	KPNA3-IT1
227126_at	1.15815	4.2772	3.39431	0.00837272	0.0335664	PTPRG
223504_at	-1.30428	6.18113	-8.81948	1.27629e-05	0.000299862	DNAJC27
235970_at	-1.17762	6.41108	-8.81905	1.27678e-05	0.000299862	LCORL
202947_s_at	1.82897	9.31827	8.81829	1.27764e-05	0.000299936	GYPC
229751_s_at	1.54379	6.2498	8.81719	1.2789e-05	0.000300103	PUS7L
244013_at	-1.68039	5.08573	-8.81447	1.28202e-05	0.000300705	CCDC23
232044_at	-2.20538	7.55455	-8.81285	1.28387e-05	0.000300896	RBBP6
209900_s_at	1.35703	8.13023	8.8128	1.28393e-05	0.000300896	SLC16A1
222413_s_at	-1.1748	6.06146	-3.39932	0.00830782	0.0333674	MLL3
224651_at	-1.07648	8.85699	-8.81096	1.28605e-05	0.000301134	CCNY
209302_at	1.27681	9.45409	8.80832	1.2891e-05	0.00030172	POLR2H
218408_at	1.01951	8.87363	3.40406	0.00824696	0.0331936	TIMM10
242560_at	1.09228	9.00973	8.80341	1.29478e-05	0.000302566	FANCD2
233630_at	-1.04634	5.13208	-3.40497	0.00823533	0.0331517	CDS2
226627_at	3.27725	6.45313	8.80199	1.29643e-05	0.000302566	2013-09-08
202887_s_at	2.33381	10.2075	8.80173	1.29673e-05	0.000302566	DDIT4
214743_at	-1.54451	8.04591	-8.8014	1.29711e-05	0.000302566	CUX1
217501_at	-1.04463	7.43621	-8.79901	1.29989e-05	0.000303076	CIAO1
238722_x_at	-1.00951	6.01805	-3.40987	0.00817301	0.0329558	NAPEPLD
244801_at	-1.60766	5.39643	-3.41352	0.00812687	0.032808	PSMB7
218692_at	-1.19117	5.75087	-3.4137	0.00812453	0.0328039	SYBU
208737_at	-1.33969	10.013	-8.78823	1.31252e-05	0.000305501	ATP6V1G1
225768_at	-2.74423	8.20774	-8.78515	1.31615e-05	0.000306086	NR1D2
201408_at	-1.0708	9.23832	-8.78303	1.31865e-05	0.000306415	PPP1CB
208962_s_at	2.63897	7.61874	8.78187	1.32003e-05	0.000306466	FADS1
239178_at	-1.5551	3.48408	-8.78113	1.32091e-05	0.000306477	FGF9
227073_at	-1.62314	7.98001	-8.78088	1.3212e-05	0.000306477	MAP3K2
220140_s_at	1.42229	8.67774	8.7778	1.32486e-05	0.000307197	SNX11
1568720_at	1.06469	5.44865	3.42009	0.00804448	0.0325581	ZNF506
211561_x_at	1.40397	6.80077	8.77488	1.32834e-05	0.000307745	MAPK14
214597_at	3.09747	5.55152	8.77487	1.32835e-05	0.000307745	SSTR2
213058_at	1.37427	5.95727	3.42303	0.00800795	0.0324515	TTC28
202308_at	1.22743	7.22523	8.77217	1.33158e-05	0.000308361	SREBF1
209688_s_at	-1.00706	8.45846	-8.77023	1.3339e-05	0.000308679	CCDC93
209449_at	1.42382	9.43561	8.76783	1.33678e-05	0.000308912	LSM2
212333_at	1.5284	9.22125	8.76727	1.33746e-05	0.000308938	FAM98A
212500_at	1.22571	9.21878	8.76672	1.33812e-05	0.000308959	ADO
232599_at	-1.42563	4.07236	-3.42796	0.00794702	0.0322595	EXOC6
202984_s_at	-1.36013	8.89989	-8.7635	1.342e-05	0.000309725	BAG5
203087_s_at	1.79619	9.13723	8.76262	1.34307e-05	0.000309814	KIF2A
218099_at	1.17535	7.43787	8.76137	1.34457e-05	0.000309814	TEX2
222250_s_at	1.10716	7.80807	8.76084	1.34522e-05	0.000309814	INTS7
227094_at	1.13411	9.13766	8.75465	1.35273e-05	0.000311151	DHTKD1
244546_at	-1.11109	6.02265	-3.43538	0.00785633	0.0319768	CYCS
231775_at	-1.26625	7.89944	-8.74917	1.35941e-05	0.000312294	TNFRSF10A
211067_s_at	1.71954	6.3353	3.43958	0.0078054	0.0318169	GAS7
212420_at	-1.23854	8.49183	-8.7448	1.36477e-05	0.000313192	ELF1
217863_at	-1.22032	8.61476	-8.74458	1.36504e-05	0.000313192	PIAS1
206018_at	2.27185	4.90009	8.74187	1.36839e-05	0.000313828	FOXG1
244321_at	-1.67982	4.28104	-8.73862	1.3724e-05	0.000314352	PGAP1
210385_s_at	1.00455	7.04644	3.44514	0.00773855	0.0316104	ERAP1
201824_at	1.05826	8.15646	8.7339	1.37824e-05	0.000315559	RNF14
242726_at	-1.41164	4.94198	-3.44674	0.00771948	0.031549	ACSL3
230391_at	1.69543	8.84219	8.73118	1.38164e-05	0.000316072	CD84
202160_at	-1.5865	9.5978	-8.72965	1.38354e-05	0.000316373	CREBBP
236492_at	-1.04372	7.40738	-3.44885	0.00769435	0.031458	PPP2R2A
222672_at	1.45722	7.37018	8.72765	1.38603e-05	0.000316374	LYRM4
225629_s_at	-1.11009	9.01026	-8.7275	1.38623e-05	0.000316374	ZBTB4
207037_at	1.99284	5.19491	8.7267	1.38723e-05	0.000316374	TNFRSF11A
203659_s_at	-1.50408	8.76594	-8.72643	1.38756e-05	0.000316374	TRIM13
243764_at	-1.11819	3.76527	-8.72305	1.39181e-05	0.000316807	VSIG1
212412_at	-1.08288	7.8959	-8.72257	1.39241e-05	0.000316812	PDLIM5
210407_at	-1.47833	6.09201	-8.72192	1.39322e-05	0.000316865	PPM1A
209512_at	1.65732	7.7227	8.72094	1.39445e-05	0.000316867	HSDL2
203432_at	1.80949	9.23201	8.72054	1.39497e-05	0.000316867	TMPO
242210_at	-1.2766	4.77918	-8.7197	1.39602e-05	0.000316975	ZNF24
230925_at	1.55733	9.66477	8.71592	1.4008e-05	0.000317927	APBB1IP
207365_x_at	-1.05626	9.61293	-3.45748	0.00759244	0.0311415	USP34
223318_s_at	1.0242	8.84053	3.45788	0.00758765	0.0311289	ALKBH7
1565705_x_at	-2.04923	5.7985	-8.71452	1.40256e-05	0.000318196	ARPC3
225171_at	2.21791	7.76047	8.71243	1.40522e-05	0.000318666	ARHGAP18
211540_s_at	-1.03608	5.43377	-3.46132	0.00754753	0.0310108	RB1
212452_x_at	-1.08454	6.73213	-8.70795	1.41092e-05	0.000319561	KAT6B
228231_at	1.22921	8.22451	8.70519	1.41444e-05	0.000320123	SNX8
228258_at	-1.7204	8.77041	-8.70509	1.41457e-05	0.000320123	TBC1D10C
222516_at	1.27102	9.1191	8.70425	1.41564e-05	0.000320232	AP3M1
201010_s_at	-1.45567	10.6128	-3.46486	0.00750636	0.0308718	TXNIP
225262_at	-3.75957	5.65871	-8.70057	1.42036e-05	0.000321167	FOSL2
241425_at	-1.13865	6.75707	-3.46746	0.00747627	0.0307805	NUPL1
224320_s_at	1.67809	7.83855	8.69456	1.4281e-05	0.000322651	MCM8
203568_s_at	-1.29492	8.72105	-8.69215	1.43122e-05	0.000322804	TRIM38
222200_s_at	-1.24999	8.08364	-8.692	1.43142e-05	0.000322804	BSDC1
209243_s_at	1.0751	3.78019	8.69196	1.43147e-05	0.000322804	PEG3
224869_s_at	1.51854	8.69197	8.69133	1.43229e-05	0.000322804	MRPS25
212989_at	-1.22705	8.22408	-8.69118	1.43248e-05	0.000322804	SGMS1
203247_s_at	-1.03663	9.09772	-8.6894	1.43479e-05	0.000323094	ZNF24
205414_s_at	1.16782	5.893	3.47371	0.00740452	0.0305426	ARHGAP44
243233_at	-2.7508	5.35392	-3.47413	0.00739972	0.030532	RNU6-82
202242_at	1.24106	5.09095	8.68271	1.44351e-05	0.00032479	TSPAN7
230988_at	1.07052	5.07463	3.4781	0.00735453	0.0304029	ADD2
209390_at	-1.23538	8.30445	-8.67979	1.44734e-05	0.000325384	TSC1
228603_at	-1.34615	8.77116	-3.48029	0.00732975	0.0303188	ACTR3
222216_s_at	1.33498	8.84037	8.67633	1.45188e-05	0.000326137	MRPL17
213050_at	1.58639	5.11066	8.67572	1.45269e-05	0.000326184	COBL
229845_at	1.55807	6.89246	8.67482	1.45387e-05	0.000326315	MAPKAP1
236728_at	-1.47099	6.55601	-3.48246	0.00730529	0.0302543	LNPEP
218384_at	1.15313	8.65732	8.67207	1.45751e-05	0.000326966	CARHSP1
204897_at	1.37846	9.32768	3.48409	0.00728689	0.0301918	PTGER4
225638_at	1.34909	9.34944	8.66914	1.46138e-05	0.000327464	C1orf31
207848_at	-1.43182	4.73253	-3.48791	0.00724414	0.0300564	AVP
217538_at	-1.65907	6.51782	-8.66248	1.47024e-05	0.000329313	SGSM2
241867_at	-1.13814	6.05937	-3.49045	0.00721576	0.0299743	PARP6
231824_at	1.25311	5.42161	8.65931	1.47447e-05	0.000330043	LARP1B
205174_s_at	-1.56669	5.77785	-3.49172	0.00720171	0.0299283	QPCT
217933_s_at	1.27754	10.3407	8.65858	1.47546e-05	0.000330043	LAP3
228368_at	-1.35918	4.35553	-8.65416	1.48139e-05	0.000330727	ARHGAP20
1555486_a_at	2.54834	6.20445	8.65235	1.48383e-05	0.000331137	PRR5L
203467_at	1.04035	7.93149	8.65161	1.48483e-05	0.000331225	PMM1
225099_at	1.22137	8.36363	8.65037	1.4865e-05	0.000331463	FBXO45
242492_at	-1.22156	6.61752	-3.49864	0.0071254	0.0297005	CLNS1A
226905_at	2.27144	7.59249	3.4995	0.00711596	0.029677	FAM101B
223584_s_at	-1.38241	7.71246	-3.50127	0.00709659	0.0296165	KBTBD2
222142_at	-1.07479	5.57594	-3.50267	0.00708129	0.0295707	CYLD
202437_s_at	4.2862	6.57571	8.63776	1.50365e-05	0.000334614	CYP1B1
226412_at	-1.00937	8.99114	-3.50484	0.00705762	0.0294854	PNISR
215726_s_at	2.5952	9.40699	8.63644	1.50545e-05	0.000334732	CYB5A
238541_at	1.10117	6.27562	8.63391	1.50893e-05	0.000335368	C21orf58
209054_s_at	1.49412	8.86009	8.63267	1.51062e-05	0.000335609	WHSC1
1557737_s_at	-1.30231	5.92989	-3.50833	0.00701989	0.0293547	NKTR
238659_at	-1.25418	4.47162	-8.6307	1.51334e-05	0.000336077	KIAA0141
40837_at	-1.42814	6.34588	-8.6297	1.51471e-05	0.000336244	TLE2
223595_at	1.20296	5.42062	3.51093	0.00699188	0.0292644	TMEM133
220586_at	-1.30619	4.59673	-3.51196	0.0069808	0.029227	CHD9
[truncated: 2,503 more rows]
