# Supplementary material for: Large-scale hypomethylated blocks associated with Epstein-Barr virus–induced B-cell immortalization
Source: HighWire-hosted journal article supplement (doi:10.1101/gr.157743.113), 2013-09-25
Supplement: Supplemental_Materials.pdf [file Supplemental_Materials.pdf]

# Supplementary Material for

**Large-scale hypomethylated blocks associated with Epstein-Barr virus-induced**

**B-cell immortalization**

Kasper D. Hansen<sup>1,2,3\*</sup>, Sarven Sabunciyani<sup>2,4\*</sup>, Ben Langmead<sup>2,5</sup>, Noemi Nagy<sup>6</sup>,  
Rebecca Curley<sup>2,7</sup>, Georg Klein<sup>6</sup>, Eva Klein<sup>6</sup>, Daniel Salamon<sup>6</sup>, and Andrew P. Feinberg<sup>2,7†</sup>

Depts. of <sup>1</sup>Biostatistics, <sup>4</sup>Pediatrics, <sup>5</sup>Computer Science, and <sup>7</sup>Medicine, <sup>2</sup>Center for Epigenetics,  
and <sup>3</sup>Institute of Genetic Medicine, Johns Hopkins University, 855 N. Wolfe St., Baltimore, MD  
21205; <sup>6</sup>Department of Microbiology, Tumor and Cell Biology (MTC), Karolinska Institutet,  
Nobels väg 16, S-171 77 Stockholm, Sweden

\*Co-equal authors

†Corresponding author: [afeinberg@jhu.edu](mailto:afeinberg@jhu.edu)

**M-bias for mate 1**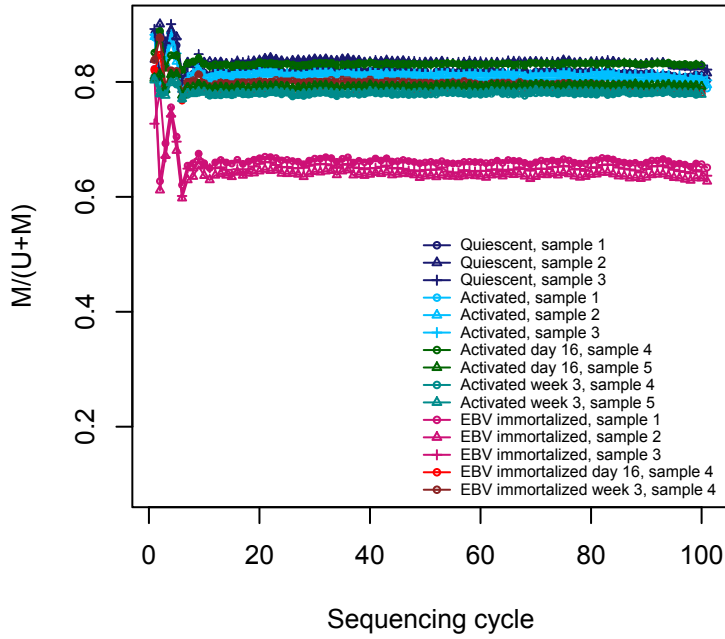**M-bias for mate 2**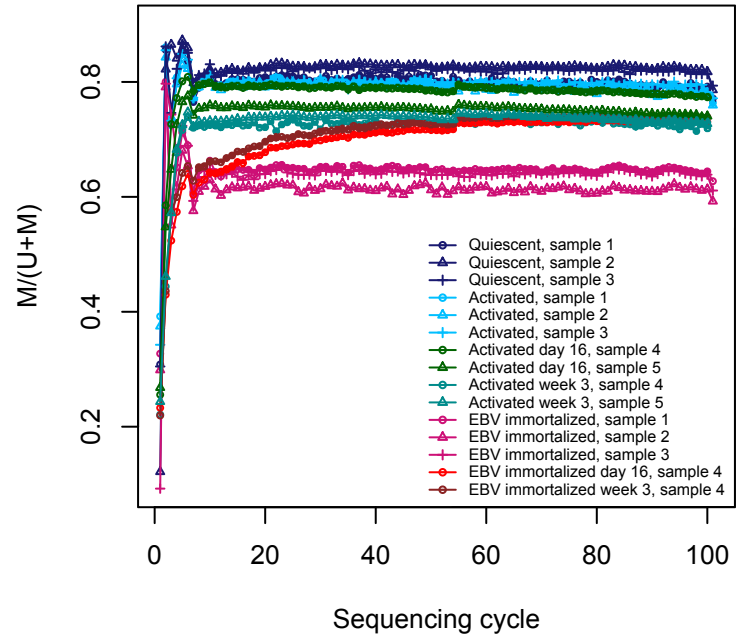

**Supplementary Figure 1.** Methylation-bias (M-bias) plots for whole-genome bisulfite sequencing samples. We plotted the mean methylation estimate for each position along our bisulfite converted sequencing reads to check for potential biases. The results for mate 1 and mate 2 reads were plotted separately. Little difference was observed in methylation estimates within an individual sample for bases from position 10 to 100. In both mates, reads containing a CpG site in the first 10 bases were excluded from the analysis since biases introduced during the end repair step of library preparation cause methylation estimates for these bases to vary based on position. The M-bias plot for the EBV transformed samples at day 16 and week 3 suggests that these two samples have a slight bias towards hypomethylation. Note that the conclusion in this manuscript is that these samples are not hypo-methylated throughout the genome.

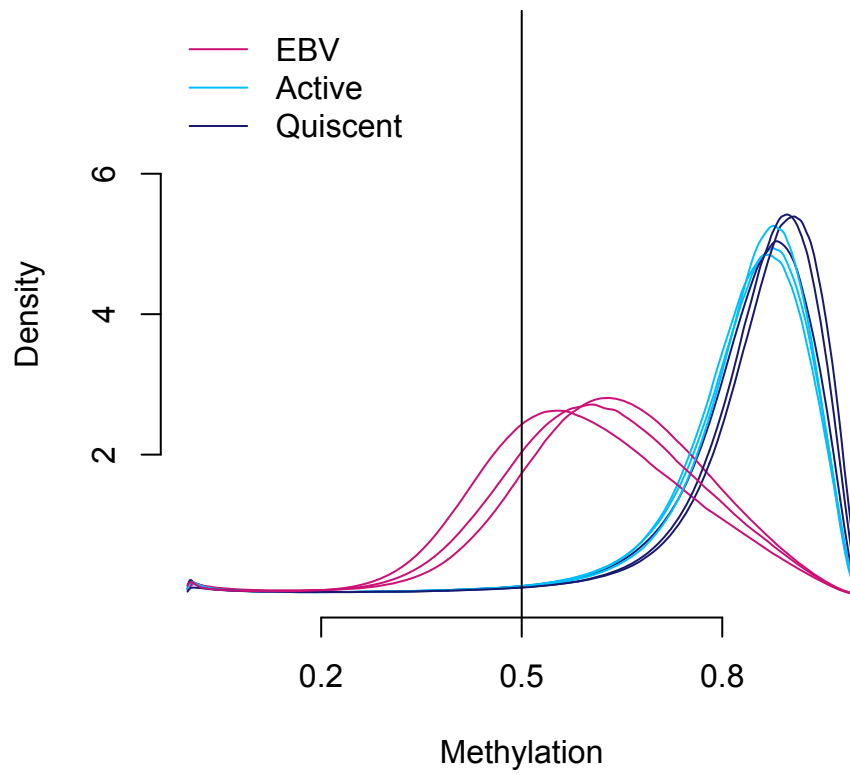

**Supplementary Figure 2.** The distribution of methylation across all CpGs inside EBV blocks. The figure shows that most of the CpGs have a methylation value greater than 50%, showing that blocks are not 50% methylated genome-wide.

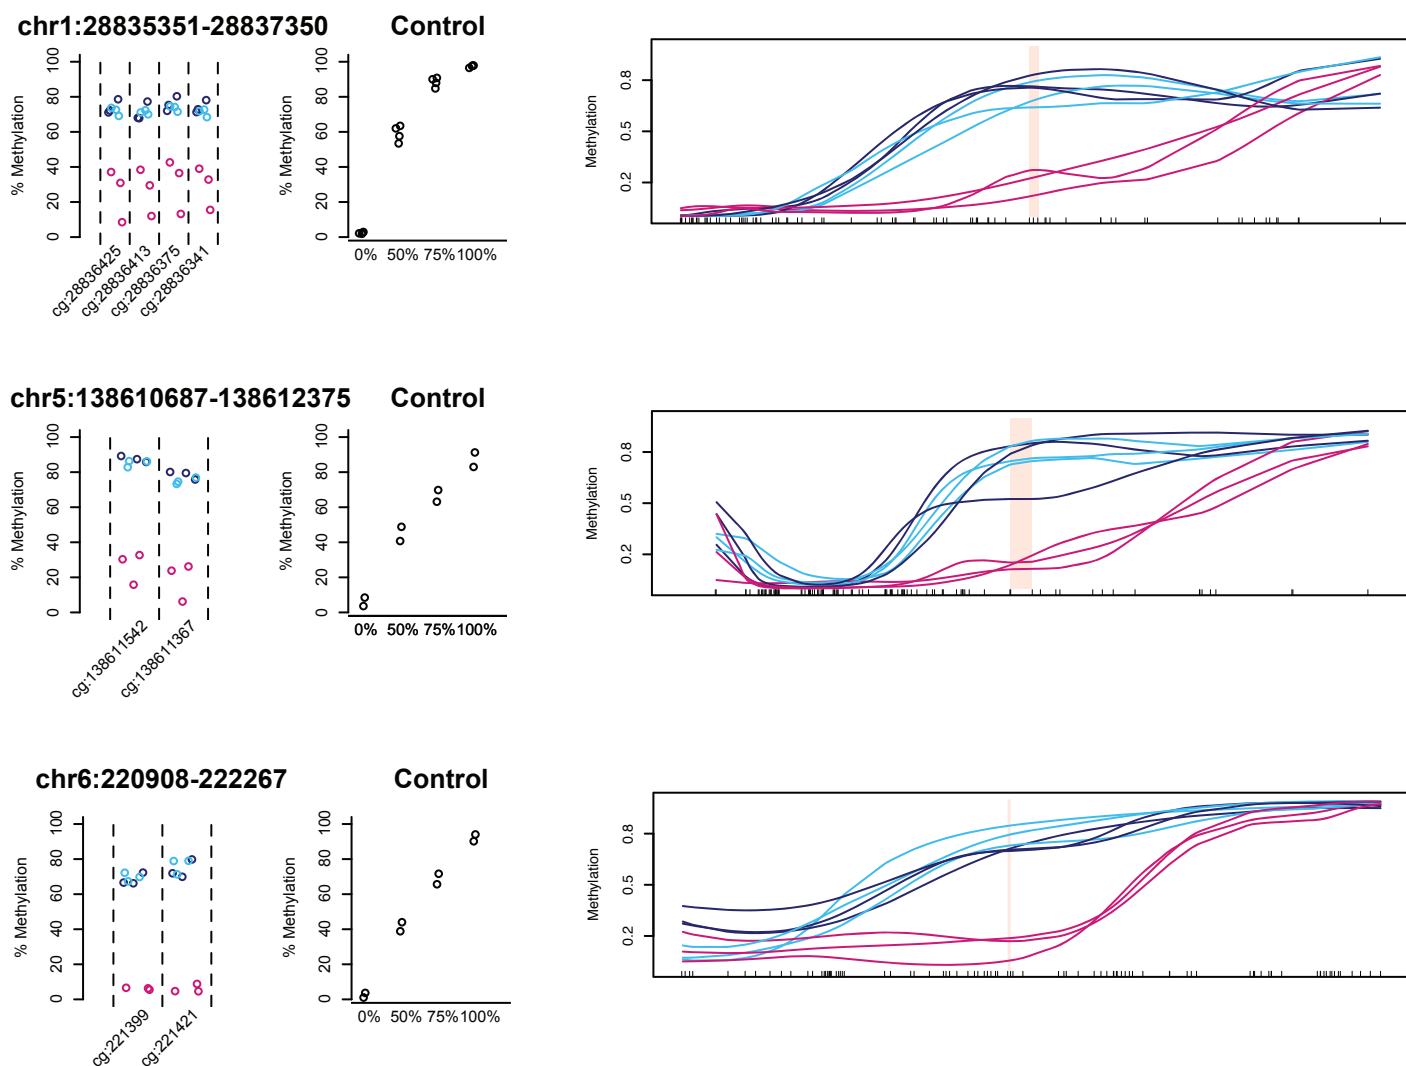

**Supplementary Figure 3.** Validation of WGBS DMRs using bisulfite pyrosequencing. Bisulfite pyrosequencing was used to measure DNA methylation in EBV transformed, CD40 activated and quiescent B-cells in DMR regions identified by WGBS. Control reactions using 0%, 50%, 75% and 100% methylated DNA was performed to assess and verify the performance of the pyrosequencing assays. The plots on the right shows the WGBS data with the region chosen for pyrosequencing marked in red. This is the first of two figures showing pyrosequencing.

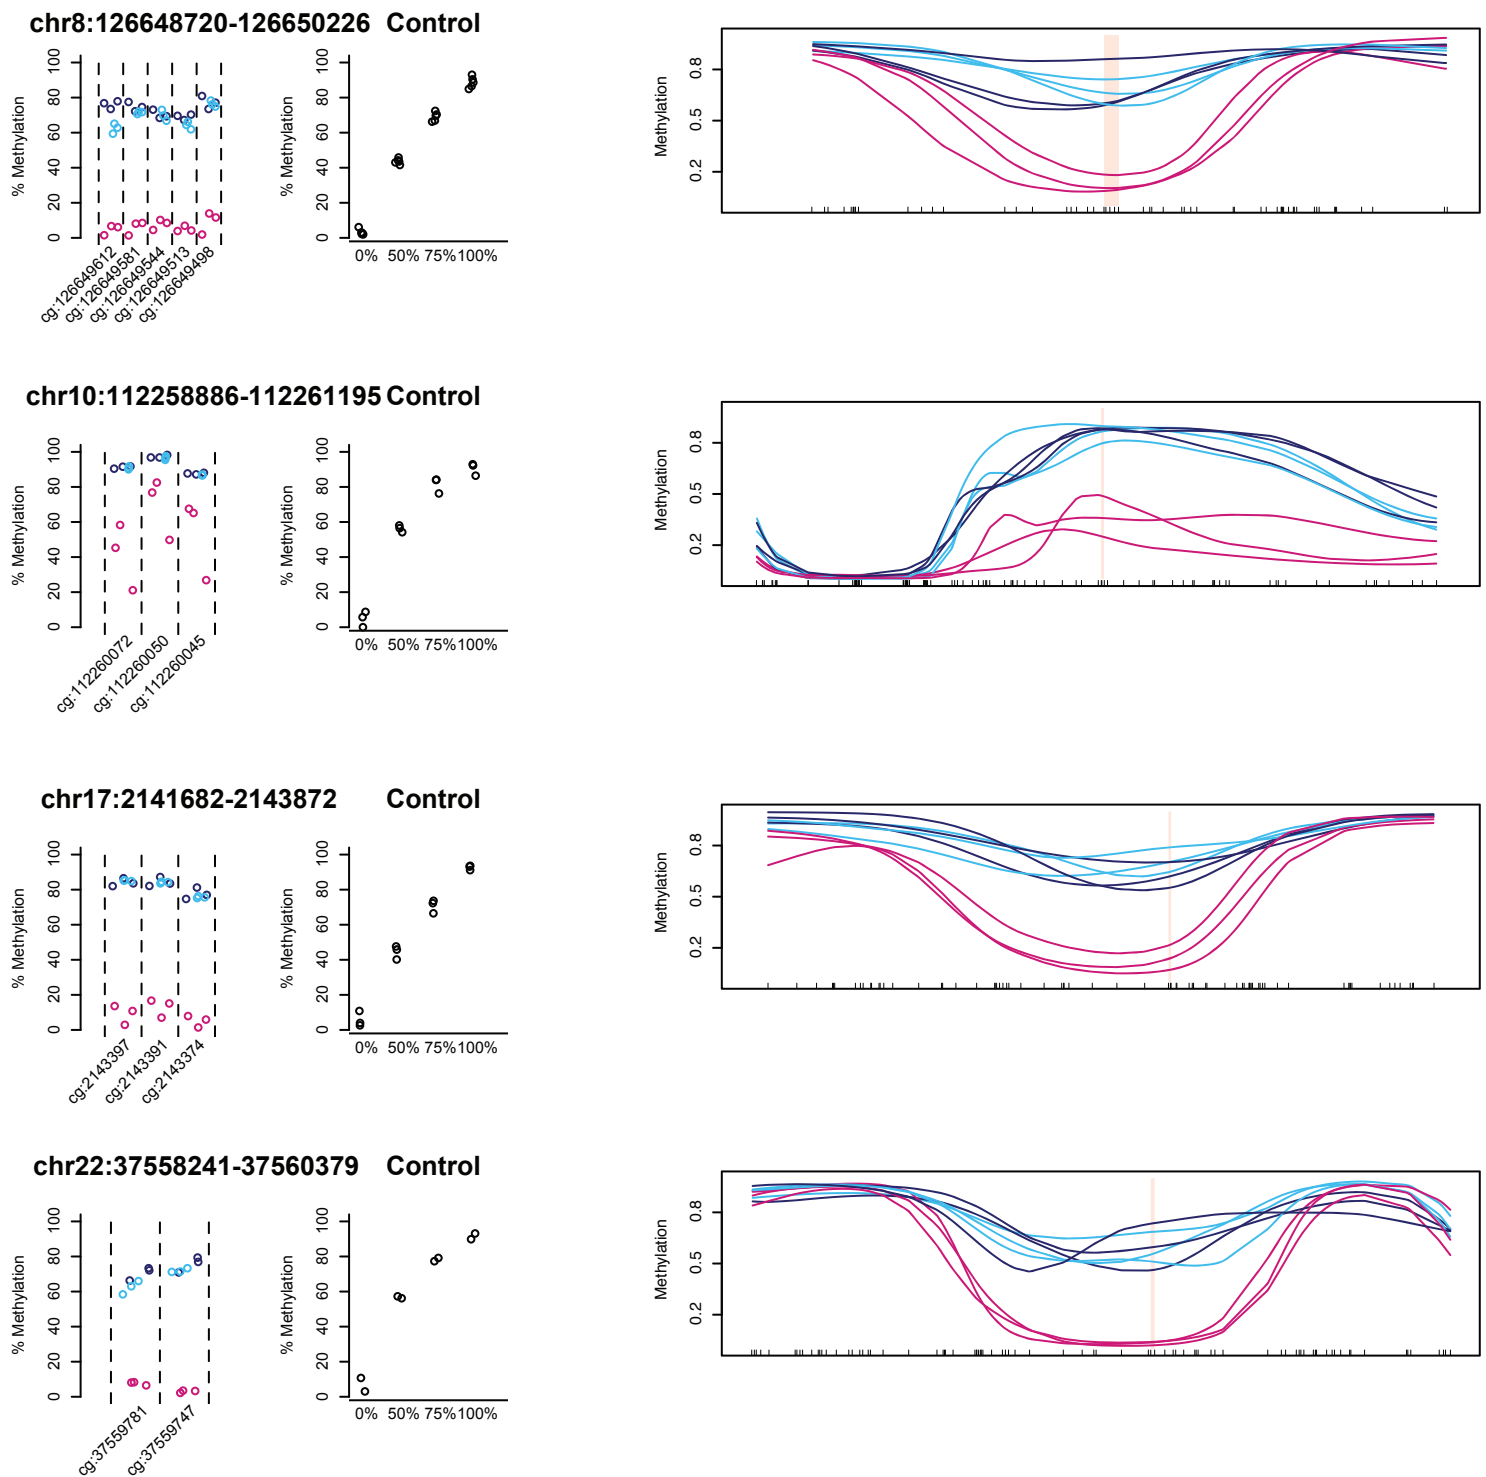

**Supplementary Figure 4.** Validation of WGBS DMRs using bisulfite pyrosequencing. Bisulfite pyrosequencing was used to measure DNA methylation in EBV transformed, CD40 activated and quiescent B-cells in DMR regions identified by WGBS. Control reactions using 0%, 50%, 75% and 100% methylated DNA was performed to assess and verify the performance of the pyrosequencing assays. The plots on the right shows the WGBS data with the region chosen for pyrosequencing marked in red. This is the second of two figures showing pyrosequencing.

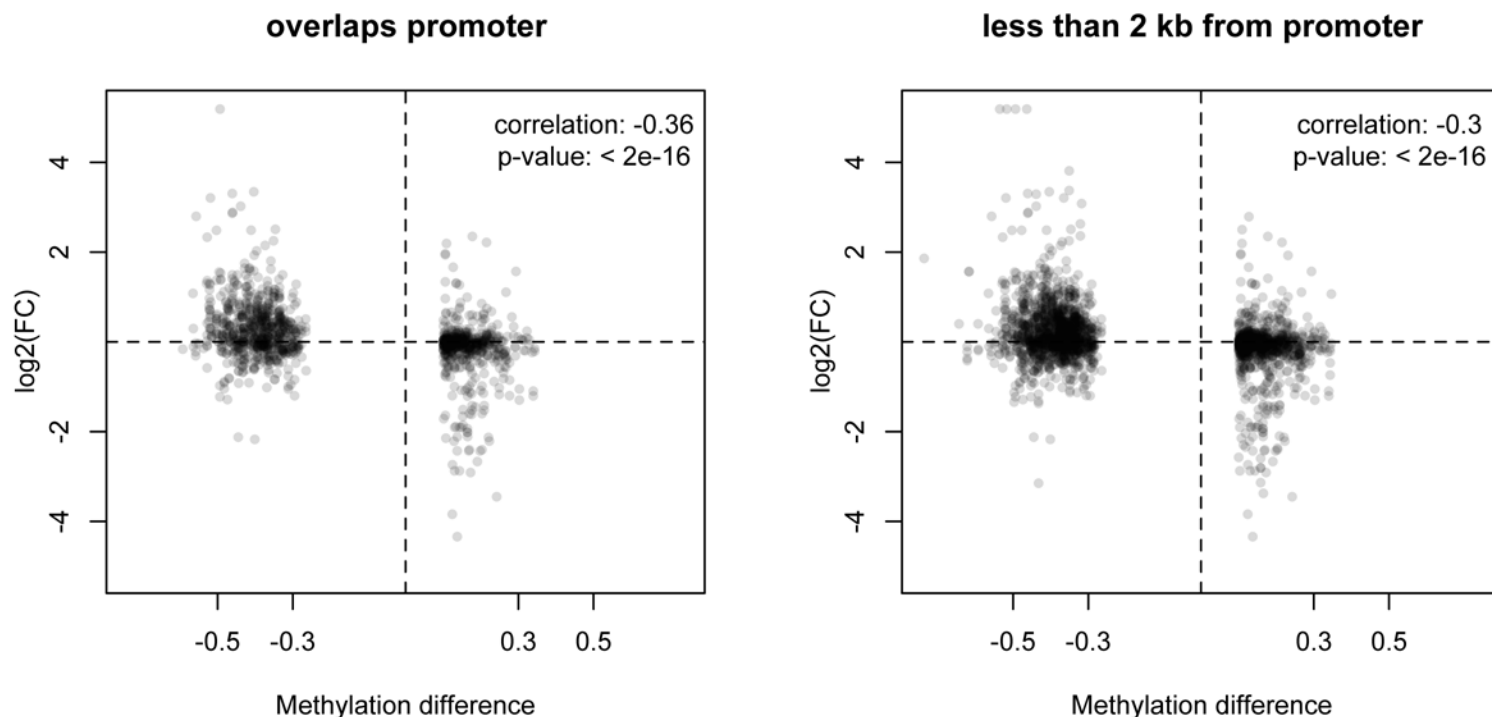

**Supplementary Figure 5.** Comparing EBV transformed cells to active cells, we investigated the relationship between small DMRs and gene expression measured using Affymetrix microarrays. We annotated transcription start sites using Ensembl, and defined promoters to be 2 kb upstream of transcription start sites (TSSs). Because the microarray assays the 3' end of the gene, one probeset may be associated with multiple TSSs. We identified small DMRs overlapping promoters (first panel) or within 2kb of a promoter (second panel). The plot shows the relationship between average methylation change across the small DMRs and the estimated fold change of the associated gene. As expected, we see a significant negative correlation. A DMR may be in the vicinity of multiple promoters, and the first panel contains 1,314 promoter-DMR pairs representing 1,266 Affymetrix probesets and 713 small DMRs. The second panel contains 2,491 promoter-DMR pairs representing 2,286 Affymetrix probesets and 1,203 small DMRs.

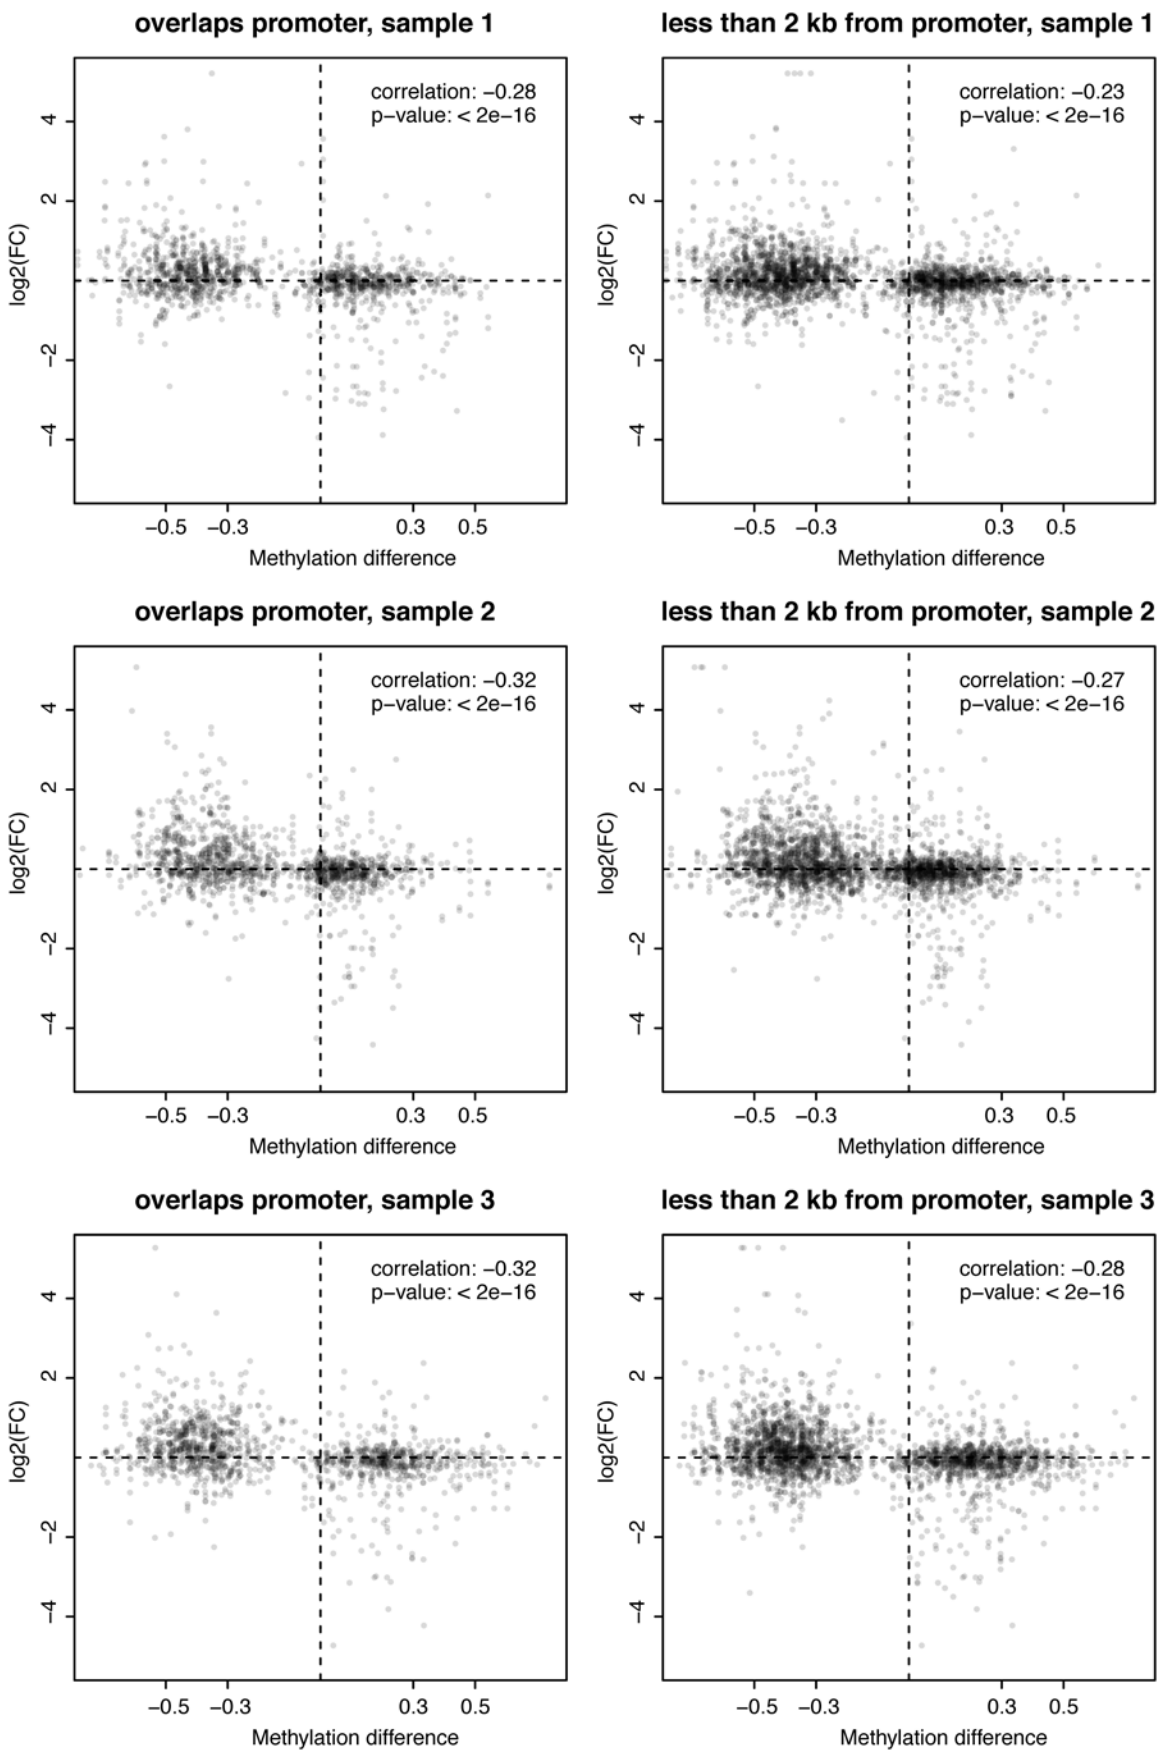

**Supplementary Figure 6.** As Supplementary Figure 5, but each sample is plotted separately.

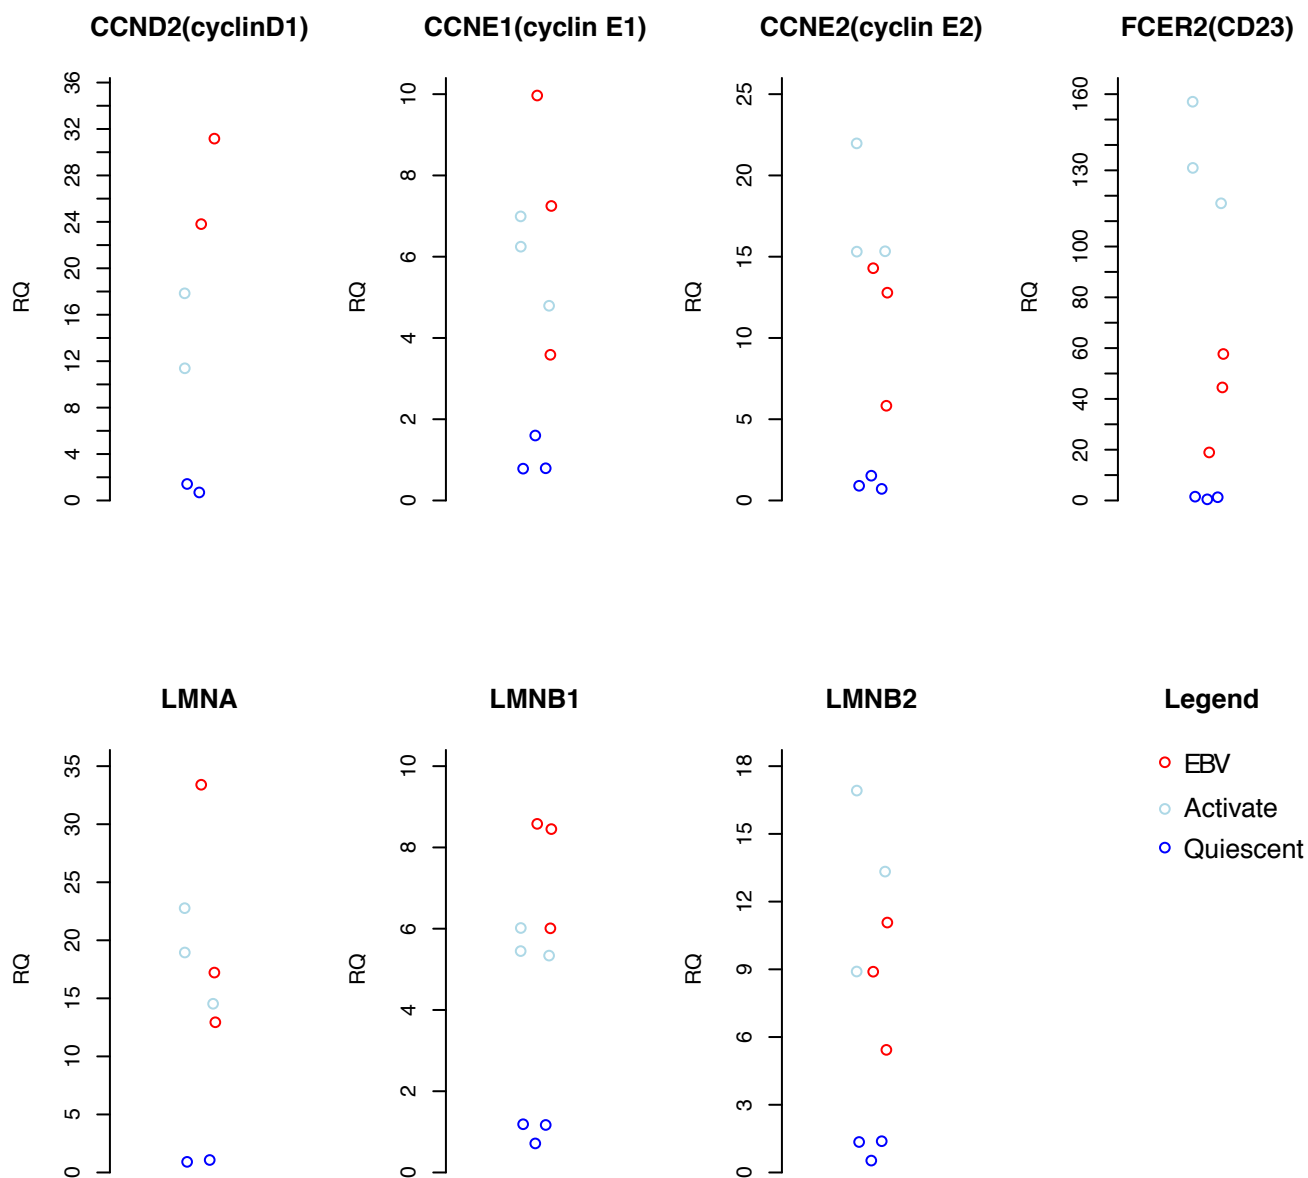

**Supplementary Figure 7.** Validation of differential gene expression using qPCR. Taqman quantitative PCR was performed to validate microarray results: The  $\Delta\Delta C_t$  method was used to perform relative quantification of gene expression levels between EBV transformed lymphocyte cell lines, CD-40 activated B-cells and resting B-cells for 7 genes. The relative quantification (RQ) value was calculated using the formula  $2^{-\Delta\Delta C_t}$ .



## Supplementary Table 1

Whole-genome bisulfite sequencing (WGBS) alignment statistics

| Sample                 | HiSeq 2000 sequencing | # paired-end reads sequenced | # ends sequenced (reads x2) | # ends aligned | Average coverage* | Column E as % of all ends | # ends aligned with mapping quality >= 10 | Column H as % of all ends | Non-unique | Column J as % of all ends |
|------------------------|-----------------------|------------------------------|-----------------------------|----------------|-------------------|---------------------------|-------------------------------------------|---------------------------|------------|---------------------------|
| Quiescent 1            | 1 lane                | 195,911,086                  | 391,822,172                 | 332,253,053    | 11.71             | 84.80%                    | 266,142,132                               | 67.92%                    | 66,110,921 | 16.87%                    |
| Quiescent 2            | 1 lane                | 147,760,733                  | 295,521,466                 | 265,323,933    | 9.35              | 89.78%                    | 223,973,373                               | 75.79%                    | 41,350,560 | 13.99%                    |
| Quiescent 3            | 1 lane                | 206,558,449                  | 413,116,898                 | 342,718,342    | 12.08             | 82.96%                    | 270,643,700                               | 65.51%                    | 72,074,642 | 17.45%                    |
| Activated 1            | 1 lane                | 140,860,942                  | 281,721,884                 | 251,935,589    | 8.88              | 89.43%                    | 207,037,749                               | 73.49%                    | 44,897,840 | 15.94%                    |
| Activated 2            | 1 lane                | 204,213,232                  | 408,426,464                 | 325,499,670    | 11.47             | 79.70%                    | 260,194,277                               | 63.71%                    | 65,305,393 | 15.99%                    |
| Activated 3            | 1 lane                | 213,890,590                  | 427,781,180                 | 346,358,367    | 12.21             | 80.97%                    | 277,357,516                               | 64.84%                    | 69,000,851 | 16.13%                    |
| EBV immortalized 1     | 1 lane                | 178,588,206                  | 357,176,412                 | 322,347,829    | 11.36             | 90.25%                    | 266,163,480                               | 74.52%                    | 56,184,349 | 15.73%                    |
| EBV immortalized 2     | 1 lane                | 214,420,911                  | 428,841,822                 | 356,086,606    | 12.55             | 83.03%                    | 284,392,959                               | 66.32%                    | 71,693,647 | 16.72%                    |
| EBV immortalized 3     | 1 lane                | 140,983,322                  | 281,966,644                 | 254,002,460    | 8.95              | 90.08%                    | 215,356,652                               | 76.38%                    | 38,645,808 | 13.71%                    |
| Activated 4, day 16    | 1 lane                | 147,267,515                  | 294,535,030                 | 245,293,798    | 8.65              | 83.28%                    | 201,576,737                               | 68.44%                    | 43,717,061 | 14.84%                    |
| Activated 5, day 16    | 1 lane                | 150,674,454                  | 301,348,908                 | 255,252,951    | 9.00              | 84.70%                    | 199,528,780                               | 66.21%                    | 55,724,171 | 18.49%                    |
| Activated 4, week 3    | 1 lane                | 227,908,920                  | 455,817,840                 | 321,742,881    | 11.34             | 70.59%                    | 258,112,234                               | 56.63%                    | 63,630,647 | 13.96%                    |
| Activated 5, week 3    | 1 lane                | 139,706,597                  | 279,413,194                 | 167,000,811    | 5.89              | 59.77%                    | 129,727,032                               | 46.43%                    | 37,273,779 | 13.34%                    |
| EBV infected 4, day 16 | 1 lane                | 146,050,097                  | 292,100,194                 | 277,111,628    | 9.77              | 94.87%                    | 219,898,372                               | 75.28%                    | 57,213,256 | 19.59%                    |
| EBV infected 4, week 3 | 1 lane                | 143,565,595                  | 287,131,190                 | 274,995,894    | 9.69              | 95.77%                    | 223,945,976                               | 77.99%                    | 51,049,918 | 17.78%                    |

\* denominator is the number of non-N bases in the human, lambda phage, and EBV reference sequences (2,865,005,545)

Supplementary Table 2

Whole-genome bisulfite sequencing (WGBS) read-level measurements statistics

| Sample               | # read-level measurements | # CpGs covered by at least one read-level measurement before filtering | Column C as % of CpGs* | # read-level measurements filtered out because sequencing cycle was aberrant according to M-bias plot | Column E as % of all read-level measurements | # read-level measurements filtered out because alignment allele was neither C nor T | Column G as % of all read-level measurements | # read-level measurements filtered out because alignment mapping quality was < 10 |
|----------------------|---------------------------|------------------------------------------------------------------------|------------------------|-------------------------------------------------------------------------------------------------------|----------------------------------------------|-------------------------------------------------------------------------------------|----------------------------------------------|-----------------------------------------------------------------------------------|
| Quiescent 1          | 277,166,593               | 25,237,980                                                             | 89.31%                 | 26,207,926                                                                                            | 9.46%                                        | 4,851,867                                                                           | 1.75%                                        | 66,063,083                                                                        |
| Quiescent 2          | 214,445,094               | 23,510,492                                                             | 83.20%                 | 20,799,525                                                                                            | 9.70%                                        | 2,020,813                                                                           | 0.94%                                        | 44,156,753                                                                        |
| Quiescent 3          | 283,539,411               | 25,054,176                                                             | 88.66%                 | 26,584,965                                                                                            | 9.38%                                        | 4,036,786                                                                           | 1.42%                                        | 68,914,650                                                                        |
| Activated 1          | 224,920,143               | 24,725,355                                                             | 87.50%                 | 21,116,578                                                                                            | 9.39%                                        | 2,190,252                                                                           | 0.97%                                        | 48,319,192                                                                        |
| Activated 2          | 295,060,766               | 25,115,691                                                             | 88.88%                 | 27,443,760                                                                                            | 9.30%                                        | 4,565,647                                                                           | 1.55%                                        | 67,614,714                                                                        |
| Activated 3          | 299,791,093               | 25,496,369                                                             | 90.23%                 | 27,846,350                                                                                            | 9.29%                                        | 4,975,358                                                                           | 1.66%                                        | 68,763,806                                                                        |
| EBV immortalized 1   | 296,691,189               | 25,540,013                                                             | 90.38%                 | 27,219,015                                                                                            | 9.17%                                        | 3,106,396                                                                           | 1.05%                                        | 61,007,074                                                                        |
| EBV immortalized 2   | 318,438,364               | 25,358,400                                                             | 89.74%                 | 29,063,999                                                                                            | 9.13%                                        | 5,425,408                                                                           | 1.70%                                        | 74,729,172                                                                        |
| EBV immortalized 3   | 203,982,182               | 22,445,929                                                             | 79.43%                 | 18,461,034                                                                                            | 9.05%                                        | 1,718,787                                                                           | 0.84%                                        | 41,031,595                                                                        |
| Activated 4, day 16  | 231,291,663               | 26,618,544                                                             | 94.20%                 | 20,783,514                                                                                            | 8.99%                                        | 6,146,555                                                                           | 2.66%                                        | 57,914,057                                                                        |
| Activated 5, day 16  | 329,174,858               | 27,959,514                                                             | 98.95%                 | 29,804,772                                                                                            | 9.05%                                        | 8,359,904                                                                           | 2.54%                                        | 96,093,569                                                                        |
| Activated 4, week 3  | 387,084,565               | 19,687,270                                                             | 69.67%                 | 36,022,428                                                                                            | 9.31%                                        | 11,188,695                                                                          | 2.89%                                        | 99,101,938                                                                        |
| Activated 5, week 3  | 210,830,056               | 27,528,388                                                             | 97.42%                 | 19,107,494                                                                                            | 9.06%                                        | 5,312,695                                                                           | 2.52%                                        | 62,851,768                                                                        |
| EBV infected 4, day  | 330,956,029               | 28,005,310                                                             | 99.11%                 | 29,122,301                                                                                            | 8.80%                                        | 8,324,108                                                                           | 2.52%                                        | 91,369,563                                                                        |
| EBV infected 4, week | 264,280,896               | 27,580,704                                                             | 97.60%                 | 23,326,823                                                                                            | 8.83%                                        | 6,657,325                                                                           | 2.52%                                        | 69,511,861                                                                        |

| Sample               | Column I as % of all read-level measurements | # read-level measurements passing all filters | Column K as % of all read-level measurements | # CpGs covered by at least one read-level measurement after filtering | Column M as % of CpGs | # methylated read-level measurements from lambda genome | # unmethylated read-level measurements from lambda genome | Estimated bisulfite conversion rate: column P / (column O + column P) |
|----------------------|----------------------------------------------|-----------------------------------------------|----------------------------------------------|-----------------------------------------------------------------------|-----------------------|---------------------------------------------------------|-----------------------------------------------------------|-----------------------------------------------------------------------|
| Quiescent 1          | 23.84%                                       | 180,043,717                                   | 64.96%                                       | 24,782,937                                                            | 87.70%                | 113,400                                                 | 8141255.00                                                | 98.63%                                                                |
| Quiescent 2          | 20.59%                                       | 147,468,003                                   | 68.77%                                       | 23,088,201                                                            | 81.71%                | 194                                                     | 436.00                                                    | N/A                                                                   |
| Quiescent 3          | 24.31%                                       | 184,003,010                                   | 64.90%                                       | 24,563,678                                                            | 86.93%                | 322,638                                                 | 7,654,438.00                                              | 95.96%                                                                |
| Activated 1          | 21.48%                                       | 153,294,121                                   | 68.15%                                       | 24,361,602                                                            | 86.21%                | 177,765                                                 | 12,754,076.00                                             | 98.63%                                                                |
| Activated 2          | 22.92%                                       | 195,436,645                                   | 66.24%                                       | 24,617,192                                                            | 87.12%                | 271,615                                                 | 19,707,244.00                                             | 98.64%                                                                |
| Activated 3          | 22.94%                                       | 198,205,579                                   | 66.11%                                       | 25,068,262                                                            | 88.71%                | 121,958                                                 | 11,597,294.00                                             | 98.96%                                                                |
| EBV immortalized 1   | 20.56%                                       | 205,358,704                                   | 69.22%                                       | 25,259,270                                                            | 89.39%                | 358,917                                                 | 19,372,771.00                                             | 98.18%                                                                |
| EBV immortalized 2   | 23.47%                                       | 209,219,785                                   | 65.70%                                       | 24,904,337                                                            | 88.13%                | 183,361                                                 | 18,190,668.00                                             | 99.00%                                                                |
| EBV immortalized 3   | 20.12%                                       | 142,770,766                                   | 69.99%                                       | 22,057,501                                                            | 78.06%                | 312                                                     | 444.00                                                    | N/A                                                                   |
| Activated 4, day 16  | 25.04%                                       | 146,447,537                                   | 63.32%                                       | 22,939,517                                                            | 81.18%                | N/A **                                                  | N/A **                                                    | N/A **                                                                |
| Activated 5, day 16  | 29.19%                                       | 194,916,613                                   | 59.21%                                       | 24,875,866                                                            | 88.03%                | N/A **                                                  | N/A **                                                    | N/A **                                                                |
| Activated 4, week 3  | 25.60%                                       | 240,771,504                                   | 62.20%                                       | 15,607,301                                                            | 55.23%                | N/A **                                                  | N/A **                                                    | N/A **                                                                |
| Activated 5, week 3  | 29.81%                                       | 123,558,099                                   | 58.61%                                       | 23,694,343                                                            | 83.85%                | N/A **                                                  | N/A **                                                    | N/A **                                                                |
| EBV infected 4, day  | 27.61%                                       | 202,140,057                                   | 61.08%                                       | 25,410,136                                                            | 89.92%                | N/A **                                                  | N/A **                                                    | N/A **                                                                |
| EBV infected 4, week | 26.30%                                       | 164,784,887                                   | 62.35%                                       | 24,476,232                                                            | 86.62%                | N/A **                                                  | N/A **                                                    | N/A **                                                                |

\* denominator is the total number of CpGs in the human, lambda phage and EBV genomes

\*\* no lambda spike-in was used in these experiments

**Supplementary Table 3**  
PCR primers for the bisulfite pyrosequencing assays

|                                  |                                 |
|----------------------------------|---------------------------------|
| <u>chr1:28835351-28837350</u>    |                                 |
| Long Primer Forward              | ATGATAGTTTTAGTTTTAAAGGTTT       |
| Long Primer Reverse              | CTTCTAAATAATCCCCCTTCAATC        |
| Nest Primer Forward              | *GGATATTAGGTTTTGATTAAATAGGAT    |
| Nest Primer Reverse              | TAACAAAATTTCCATTATAACTCAC       |
|                                  |                                 |
| <u>chr5:138610687-138612375</u>  |                                 |
| Long Primer Forward              | AGATATTATTTTGAGGATTAGTTTA       |
| Long Primer Reverse              | ATACACCACAACAATTCAATAATAACAA    |
| Nest Primer Forward              | *AAGTTTTTTAATTATTTTATTTATAGAGGA |
| Nest Primer Reverse              | TCTATCCCCTAACCAATATCTAACC       |
|                                  |                                 |
| <u>chr6:220908-222267</u>        |                                 |
| Long Primer Forward              | TTTTTGTTTTTTGTAAGTGATTTTA       |
| Long Primer Reverse              | ATCCACTCTCAAATACACCTTAATC       |
| Nest Primer Forward              | ATTATAGTTGAGTAGTAAGGAGAGG       |
| Nest Primer Reverse              | *TTTAAATAACAATAATCTAAAAATAAC    |
|                                  |                                 |
| <u>chr7:39015429-39016402</u>    |                                 |
| Long Primer Forward              | GGTTTGTTGTAAATTTTTTAAGAATTAG    |
| Long Primer Reverse              | TACAATTATCCCAAATCAAAACCTC       |
| Nest Primer Forward              | *GTTATTTGGTTTTTTGTTTAGTGTT      |
| Nest Primer Reverse              | AACTTCCCATCATCTCCTTTAAC         |
|                                  |                                 |
| <u>chr7:53286427-53287678</u>    |                                 |
| Long Primer Forward              | GGTGGGTGGAATTTATAGAATTTT        |
| Long Primer Reverse              | TAAACCCAAACCTAATTTCAAAAAC       |
| Nest Primer Forward              | TTTGTTTTTTTGAAAGTTGGATATG       |
| Nest Primer Reverse              | *ATCTCTTCCCCACTCCTCTATC         |
|                                  |                                 |
| <u>chr8:126648720-126650226</u>  |                                 |
| Long Primer Forward              | TATTATTAAGTGTAAGGGTTTGGG        |
| Long Primer Reverse              | CAATTAAATTTCAAATAATAAAAAAAA     |
| Nest Primer Forward              | *TATAATGAGGTGATGGAAGTGAAAT      |
| Nest Primer Reverse              | TAAAAAACAATAAATAAAAAAACATAAA    |
|                                  |                                 |
| <u>chr10:112258886-112261195</u> |                                 |
| Long Primer Forward              | TTTTAGAAATAGATTGATTTTGTAT       |
| Long Primer Reverse              | TTTCTCTAACAACAATTTAAAATTTAATAA  |
| Nest Primer Forward              | *TGGAGATTTGTTTATATTTGATTAT      |
| Nest Primer Reverse              | TAAAACAATTTCTACTAAAACTTAAAATAC  |
|                                  |                                 |
| <u>chr17:2141682-2143872</u>     |                                 |
| Long Primer Forward              | AAGAGGAAGTAAAAGTATATTATTTGTTAT  |
| Long Primer Reverse              | TAAATCAATCCTAAACCTAAATCCC       |
| Nest Primer Forward              | *TGGAGTTTAAGTGTAGGTGTGATTT      |
| Nest Primer Reverse              | TACCATTCAAATAAAACAAAATATCTCTAA  |
|                                  |                                 |
| <u>chr22:37558241-37560379</u>   |                                 |
| Long Primer Forward              | GGAATTTAAATTGGGTATTTTGTTTT      |
| Long Primer Reverse              | TAATCTCAATTCCTCCAACCTAAC        |
| Nest Primer Forward              | *GAGGAGGGATTTTTTTTAGTTTTTG      |
| Nest Primer Reverse              | TCCCCTACTACTTTCAAATTTACTCATA    |
|                                  |                                 |
| * Denotes a 5 prime biotin       |                                 |

**Supplementary Table 4**

Sequencing primer for bisulfite pyrosequencing

|                                  |                               |
|----------------------------------|-------------------------------|
| <u>chr1:28835351-28837350</u>    |                               |
| Sequencing Primer 1              | ACTCATCAACTAAAAATACAACC       |
| Sequencing Primer 2              | TCCACTACACTACAAAAAACTAAAA     |
| Sequencing Primer 3              | TCATCTTACACTCAACCCAAA         |
|                                  |                               |
| <u>chr5:138610687-138612375</u>  |                               |
| Sequencing Primer 1              | CCAATATCTAACCAAATAATAC        |
| Sequencing Primer 2              | AACCTCCTAAATAACTAAAATA        |
|                                  |                               |
| <u>chr6:220908-222267</u>        |                               |
| Sequencing Primer 1              | AAGAAGAGAAAAAGTAGTTTGTTT      |
| Sequencing Primer 2              | GGTTGATTATGAAAATGGTT          |
|                                  |                               |
| <u>chr7:39015429-39016402</u>    |                               |
| Sequencing Primer 1              | ACAAAACTAAACCAAACCTACC        |
| Sequencing Primer 2              | AACTCACAAAAAACAAAAAA          |
|                                  |                               |
| <u>chr7:53286427-53287678</u>    |                               |
| Sequencing Primer 1              | TTATTGGGGTTTTATTAGAGGGG       |
| Sequencing Primer 2              | GAGTTTTGTTAAGTTTAGTTTTT       |
| Sequencing Primer 3              | AAGTTGGATATGGGGGGAGAG         |
|                                  |                               |
| <u>chr8:126648720-126650226</u>  |                               |
| Sequencing Primer 1              | ATCAAAAAAACTAACCTAACT         |
| Sequencing Primer 2              | CACAAAACCCACTAACTTTAA         |
| Sequencing Primer 3              | ACCTTACCTTTCATATACTAATAA      |
| Sequencing Primer 4              | CTAATAATCCCAAAAATAATTTACT     |
|                                  |                               |
| <u>chr10:112258886-112261195</u> |                               |
| Sequencing Primer 1              | AAAAACACATAAAAAAAAACATCTA     |
| Sequencing Primer 2              | CATTACTTAAAACAATAAAA          |
|                                  |                               |
| <u>chr17:2141682-2143872</u>     |                               |
| Sequencing Primer 1              | AAAATTTTAAAAAATAAAAACAAAATCAT |
|                                  |                               |
| <u>chr22:37558241-37560379</u>   |                               |
| Sequencing Primer 1              | ACAAACTCAAACCCATATAAATAATAA   |
| Sequencing Primer 2              | CCTCTACTCCACTCAAATAAC         |

## **Supplementary Data Description**

### **Supplementary Data 1 – blocks**

An Excel file with two worksheets.

Sheet 1, “Transformation” describes (hypo) methylated blocks found by comparing EBV transformed cells to activated cells. Sheet 2, “Activation” describes (hypo) methylated blocks found by comparing activated cells to quiescent cells.

Columns are

chr, start, end: genomic coordinates in GRC37h.

n: number of covered CpGs in the block.

meanDiff: average methylation difference between group 1 and group 2.

group1.mean, group2.mean: average methylation level in groups 1 and 2.

tstat.sd: estimated standard deviation for the t-statistic

direction: hypo- or hypermethylated

fwer: the estimated family-wise error rate, as an integer (number of permutations where some equally good block is observed). Blocks with family-wise error rate less than 5% is blocks with fwer=0

For sheet 1, group 1 is transformed cells and group2 is activated cells.

For sheet 2, group 1 is activated cells and group2 is quiescent cells.

## **Supplementary Data 2 – small DMRs**

An Excel file with two worksheets.

Sheet 1, “Transformation” describes small scale DMRs found by comparing EBV transformed cells to activated cells. Sheet 2, “Activation” describes small scale DMRs found by comparing activated cells to quiescent cells.

Columns are

- chr, start, end: genomic coordinates in GRC37h.
- n: number of covered CpGs in the block.
- meanDiff: average methylation difference between group 1 and group 2.
- group1.mean, group2.mean: average methylation level in groups 1 and 2.
- tstat.sd: estimated standard deviation for the t-statistic
- direction: hypo- or hypermethylated
- fwer: the estimated family-wise error rate, as an integer (number of permutations where some equally good small DMRs are observed). Small DMRs with family-wise error rate less than 5% is blocks with fwer=0

For sheet 1, group 1 is transformed cells and group2 is activated cells.

For sheet 2, group 1 is activated cells and group2 is quiescent cells.

## **Supplementary Data 3 – Differentially expressed genes**

An Excel file with two worksheets.

Sheet 1, “Transformation” describes differentially expressed genes found by comparing EBV transformed cells to activated cells. Sheet 2, “Activation” describes differentially expressed genes found by comparing activated cells to quiescent cells.

Columns are

- affyid: Affymetrix probeset identifier.
- logFC: estimated log2 fold change.
- AveExpr: average expression across the two conditions
- t: t-statistic.
- P.Value: raw p-value
- adj.P.val: adjusted (Benjamini-Hochberg) p-value
- geneSymbol: the gene symbol
